# Supplementary material for: Multiple sclerosis risk variants regulate gene expression in innate and adaptive immune cells
Source: Life Sci Alliance. 2020 Jun 9;3(7):e202000650. doi: 10.26508/lsa.202000650 (PMC7283543; doi:10.26508/lsa.202000650)
Supplement: Supplementary file 2 [file LSA-2020-00650_Supplemental_Data_2.xlsx]

## Sheet: Monocytes
Transcript Cluster ID	Gene Symbol	SNP	P-value Genotype	Rank Genotype	FDR Genotype	% Change in Expression Genotype	P-value Phenotype	FDR Phenotype All	FDR Phenotype eQTLs	% Change in Expression Phenotype	P-value Interaction	FDR Interaction All	FDR Interaction eQTLs	Chromosome	SNP Position hg38	Risk Allele	Other Allele	Risk Allele Frequency	Gene Transcript Chip Annotation	UCSC Gene Name(s)	Gene Transcription Start Site(s)	Strand	number of SNPs within 500kb of TSS	strongest eQTL	p strongest eQTL	r2 between strongest eqTL and MS risk SNP	coef.ms.snp.unadjusted	coef.ms.snp.adjusted	adjusted/unadjusted
7908388	RGS1	rs2760524	1.46277e-50	1	1.98279e-47	-0.502636	0.253069	0.951976	0.976131	-0.080258	0.00155927	0.528519	0.110708	1	192561418	G	A	0.8412	NM_002922	uc001gsi.2	192575726	+	345	rs2984920	1.49695e-51	0.978824
7908388	RGS1	rs1323292	1.46277e-50	2	1.98279e-47	-0.502636	0.253069	0.951976	0.976131	-0.080258	0.00155927	0.528519	0.110708	1	192571891	A	G	0.8412	NM_002922	uc001gsi.2	192575726	+	345	rs2984920	1.49695e-51	0.978824
7908388	RGS1	rs1359062	6.39233e-48	3	5.77654e-45	-0.489107	0.525208	0.975333	0.976131	-0.0459468	0.00994655	0.907602	0.235402	1	192572342	C	G	0.8353	NM_002922	uc001gsi.2	192575726	+	345	rs2984920	1.49695e-51	0.938422
8147019	ZC2HC1A	rs1021156	2.11393e-38	4	1.43272e-35	-0.244358	0.408449	0.968985	0.976131	-0.0307331	0.164579	0.957749	0.730319	8	78663569	A	G	0.2529	NM_016010	uc003ybd.4	78666046	+	686	rs10092335	1.3116e-38	1
7961069	CLECL1	rs10466829	2.11544e-27	5	1.14699e-24	-0.358052	0.77331	0.99578	0.976131	0.0212952	0.571295	0.977379	0.995292	12	9723495	A	G	0.5147	NM_001253750	uc058lav.1	9733299	-	607	rs11052710	6.28517e-30	0.986528
8129728	AHI1	rs11154801	3.99926e-19	6	1.807e-16	-0.181414	0.583198	0.99462	0.976131	-0.0189552	0.965609	0.999408	0.995292	6	135418217	A	C	0.3971	NM_001134830	uc003qgj.4	135497745	-	22	rs12206850	3.19817e-19	0.98713
7956631	METTL21B	rs703842	5.38982e-19	7	2.0874e-16	-0.137922	0.849771	0.998203	0.976131	-0.0055131	0.536046	0.974744	0.995292	12	57768956	A	G	0.6882	NM_015433	uc001sqg.4	57772599	+	424	rs10783848	1.60465e-20	1
7956631	METTL21B	rs201202118	1.21562e-18	8	4.11945e-16	-0.137995	0.847243	0.998203	0.976131	-0.00554173	0.536121	0.974744	0.995292	12	57788279	A	T	0.6964	NM_015433	uc001sqg.4	57772599	+	424	rs10783848	1.60465e-20	0.984905
8008016	TBKBP1	rs4794058	1.86311e-13	9	5.6121e-11	0.115494	0.208969	0.942254	0.976131	-0.0314291	0.832442	0.998254	0.995292	17	47519732	A	G	0.503	NM_014726	uc002ilu.4	47695263	+	28	rs9901869	2.22378e-14	0.934733
8008016	TBKBP1	rs4239162	2.79102e-13	10	7.56645e-11	0.114584	0.237523	0.942254	0.976131	-0.029416	0.774172	0.998254	0.995292	17	47678444	G	A	0.5059	NM_014726	uc002ilu.4	47695263	+	28	rs9901869	2.22378e-14	0.913426
8044391	MERTK	rs17174870	6.76482e-12	11	1.66722e-09	0.29261	0.435963	0.968985	0.976131	0.0490506	0.0775503	0.944376	0.730319	2	111907624	G	A	0.7618	NM_006343	uc061myp.1	111898607	+	15	rs11884641	2.099e-12	0.984145
7986010	IQGAP1	rs8042861	2.36543e-11	12	5.3439e-09	0.0380164	0.539834	0.981549	0.976131	0.00741822	0.221823	0.962732	0.760565	15	90434101	A	C	0.4588	NM_003870	uc002bpl.2	90388217	+	10	MS risk SNP	NA	1
8089954	IQCB1	rs1920296	1.97702e-10	13	4.12286e-08	0.120465	0.0925195	0.929176	0.976131	0.0494116	0.74063	0.998254	0.995292	3	121824730	C	A	0.6088	NM_001023570	uc010hre.1	121835079	-	10	MS risk SNP	NA	1
7967412	CDK2AP1	rs1790100	1.76577e-09	14	3.41928e-07	-0.0851155	0.802618	0.998203	0.976131	-0.00569655	0.930823	0.999408	0.995292	12	123172178	G	T	0.2324	NM_001270433	uc031qjy.2; uc001ueq.5; uc058usm.1; uc058usn.1; uc058uso.1; uc058usp.1; uc058usr.1	123268254; 123272140; 123269239; 123271141; 123268077; 123272334; 123268284	-	226	rs4759417	3.6632e-11	0.891196
7947815	ACP2	rs7120737	6.94735e-09	15	1.25562e-06	-0.0999382	0.784478	0.996634	0.976131	-0.00625444	0.109791	0.944376	0.730319	11	47680843	G	A	0.1324	NM_001131064	uc001nei.3; uc058bbx.1; uc010rhg.3; uc058bby.1; uc010rhf.3; uc058bbz.1; uc010rhe.3; uc058bca.1; uc058bcb.1; uc058bcc.1; uc058bcd.1; uc058bce.1; uc010rhj.3; uc058bcf.1	47248906; 47245576; 47248802; 47248816; 47248819; 47248814; 47248628; 47244960; 47248814; 47248840; 47245378; 47248805; 47248816; 47248814	-	15	rs2957873	8.74443e-29	0.276155	-0.151904	-0.021189	0.13949
8033248	TNFSF14	rs1077667	3.65442e-07	16	6.19195e-05	-0.0752054	0.922601	0.998203	0.976131	-0.00224115	0.773266	0.998254	0.995292	19	6668961	G	A	0.7941	NM_003807	uc002mfk.3	6670588	-	76	MS risk SNP	NA	1
7944331	RNU6-376P	rs533646	4.94093e-07	17	7.87932e-05	0.115514	0.591293	0.99462	0.976131	-0.0195594	0.0252447	0.907602	0.448094	11	118696037	G	C	0.6607	ENST00000384731	uc058ibf.1	118702341	+	331	rs573905	2.65423e-11	0.413503	-0.157709	-0.039175	0.2484
8026926	MAST3	rs874628	1.5328e-06	18	0.000230856	0.0449136	0.605132	0.99462	0.976131	-0.00918577	0.721535	0.998254	0.995292	19	18193890	A	G	0.7	NM_015016	uc002nhz.5	18097792	+	292	rs12052085	1.17915e-09	0.425543	-0.0627851	-0.0251663	0.400833
7967412	CDK2AP1	rs7132277	3.16088e-06	19	0.000447072	-0.0722414	0.962382	0.998203	0.976131	-0.00111189	0.103396	0.944376	0.730319	12	123108835	A	G	0.1941	NM_001270433	uc031qjy.2; uc001ueq.5; uc058usm.1; uc058usn.1; uc058uso.1; uc058usp.1; uc058usr.1	123268254; 123272140; 123269239; 123271141; 123268077; 123272334; 123268284	-	226	rs4759417	3.6632e-11	0.575859	-0.108179	0.0127195	changes sign
8026926	MAST3	rs11554159	3.2982e-06	20	0.000447072	0.0433769	0.470246	0.968985	0.976131	-0.0132216	0.550376	0.974744	0.995292	19	18175134	G	A	0.7235	NM_015016	uc002nhz.5	18097792	+	292	rs12052085	1.17915e-09	0.558287	-0.0606588	-0.0157005	0.258833
7961069	CLECL1	rs11052877	3.70595e-06	21	0.00047842	-0.22086	0.939163	0.998203	0.976131	0.00700368	0.0494626	0.944376	0.585308	12	9753094	G	A	0.3882	NM_001253750	uc058lav.1	9733299	-	607	rs11052710	6.28517e-30	0.306759	-0.360045	-0.0517977	0.143864
7940914	FKBP2	rs694739	4.58093e-06	22	0.000564495	-0.0494789	0.440384	0.968985	0.976131	-0.0155747	0.755695	0.998254	0.995292	11	64329761	A	G	0.6382	NM_001135208	uc010rnh.3	64241155	+	16	rs3741403	2.97837e-08	0.457308	0.0732095	0.024607	0.336117
8026971	IFI30	rs874628	5.02733e-06	23	0.000592569	-0.0266949	0.487093	0.968985	0.976131	0.00901759	0.48706	0.974744	0.995292	19	18193890	A	G	0.7	NM_006332	uc002nic.3	18173666	+	294	rs7259445	3.43625e-12	0.171935	0.039036	0.0222	0.568706
8077103	TYMP	rs470119	1.19059e-05	24	0.00134488	-0.0490692	0.767516	0.99578	0.976131	-0.00601006	0.22951	0.962732	0.760565	22	50528485	A	G	0.3882	NM_001113755	uc010hbd.6; uc003bme.7; uc003bmc.7; uc062fmu.1; uc003bmd.7; uc062fmv.1; uc062fmw.1; uc062fmx.1	50529999; 50530015; 50530056; 50529996; 50530032; 50530018; 50529990; 50530012	-	14	rs131794	1.15771e-06	0.426724	-0.0725878	-0.0394803	0.543897
8007949	EFCAB13	rs4794058	2.37937e-05	25	0.00258019	0.161066	0.0223113	0.908035	0.625993	-0.134298	0.156632	0.952715	0.730319	17	47519732	A	G	0.503	NM_001195192	uc002ilm.4	47324024	+	20	rs5918	2.33742e-07	0.185432	-0.21545	-0.149368	0.693285
7986068	BLM	rs8042861	3.83559e-05	26	0.00390932	0.0609793	0.655314	0.99462	0.976131	0.0120419	0.741999	0.998254	0.995292	15	90434101	A	C	0.4588	NM_000057	uc002bpr.5; uc010bnx.5; uc059ngc.1; uc059ngd.1; uc059nge.1; uc059ngg.1; uc059ngh.1; uc059ngi.1; uc059ngj.1; uc059ngk.1	90717326; 90717393; 90717403; 90747389; 90750007; 90762363; 90762395; 90790288; 90793800; 90808770	+	16	MS risk SNP	NA	1
7939738	DDB2	rs7120737	3.89346e-05	27	0.00390932	-0.102301	0.679937	0.99462	0.976131	-0.0140708	0.936852	0.999408	0.995292	11	47680843	G	A	0.1324	NM_000107	uc001neb.3	47214941	+	23	rs3824866	9.48064e-15	0.474639	-0.155697	0.094576	changes sign
7990757	CTSH	rs59772922	4.80796e-05	28	0.00461257	-0.06119	0.483682	0.968985	0.976131	0.0154899	0.241074	0.962732	0.760565	15	78915124	A	G	0.8441	NM_004390	uc021srk.2	78945091	-	295	rs34843303	1.67953e-17	0.0239083	0.0910949	0.0722358	0.792973
8063156	CD40	rs2425752	5.23591e-05	29	0.00461257	-0.0611474	0.768665	0.99578	0.976131	-0.00826729	0.797044	0.998254	0.995292	20	46073481	A	G	0.2853	NM_001250	uc002xrg.2	46118271	+	230	rs745307	5.11667e-47	0.113083	-0.0910294	-0.0447637	0.491751
7982185	DEXI	rs12927355	5.27442e-05	30	0.00461257	-0.0796801	0.911669	0.998203	0.976131	0.00362887	0.975679	0.999408	0.995292	16	11100914	G	A	0.7059	NM_014015	uc002dal.4	10942460	-	983	rs6498135	7.46707e-09	0.23443	0.119793	0.056201	0.469152
7986685	DEXI	rs12927355	5.27442e-05	31	0.00461257	-0.0796801	0.911669	0.998203	0.976131	0.00362887	0.975679	0.999408	0.995292	16	11100914	G	A	0.7059	NM_014015	uc002dal.4	10942460	-	983	rs6498135	7.46707e-09	0.23443	0.119793	0.056201	0.469152
7897119	FAM213B	rs3748817	5.57129e-05	32	0.00470025	0.0474114	0.678691	0.99462	0.976131	0.00780767	0.807193	0.998254	0.995292	1	2594226	A	G	0.6559	NM_001195736	uc001ajv.3	2586749	+	273	rs67373773	1.28014e-07	0.288462	-0.0668282	-0.028422	0.425299
7956631	METTL21B	rs12368653	5.72145e-05	33	0.00470025	-0.08125	0.759845	0.99578	0.976131	-0.010964	0.341961	0.962732	0.933816	12	57739473	A	G	0.4765	NM_015433	uc001sqg.4	57772599	+	424	rs10783848	1.60465e-20	0.400558	-0.121495	0.0297001	changes sign
7982185	DEXI	rs12708716	6.90825e-05	34	0.00535093	-0.0787641	0.863978	0.998203	0.976131	0.005626	0.968629	0.999408	0.995292	16	11086016	A	G	0.6941	NM_014015	uc002dal.4	10942460	-	983	rs6498135	7.46707e-09	0.260591	0.118357	0.0540527	0.456691
7986685	DEXI	rs12708716	6.90825e-05	35	0.00535093	-0.0787641	0.863978	0.998203	0.976131	0.005626	0.968629	0.999408	0.995292	16	11086016	A	G	0.6941	NM_014015	uc002dal.4	10942460	-	983	rs6498135	7.46707e-09	0.260591	0.118357	0.0540527	0.456691
8063156	CD40	rs4810485	8.30042e-05	36	0.00625068	-0.0643224	0.707222	0.995524	0.976131	-0.010562	0.62386	0.985816	0.995292	20	46119308	A	C	0.2706	NM_001250	uc002xrg.2	46118271	+	230	rs745307	5.11667e-47	0.101322	-0.0959165	-0.0567547	0.591709
8048898	SP140	rs9989735	8.98263e-05	37	0.00658159	-0.0692041	0.949709	0.998203	0.976131	0.0014802	0.480572	0.974744	0.995292	2	230250739	C	G	0.1737	NM_001005176	uc002vqj.4	230225763	+	226	MS risk SNP	NA	1
8007949	EFCAB13	rs4239162	0.000120056	38	0.00852863	0.152807	0.0248386	0.908035	0.625993	-0.137091	0.211563	0.962732	0.760565	17	47678444	G	A	0.5059	NM_001195192	uc002ilm.4	47324024	+	20	rs5918	2.33742e-07	0.183111	-0.205151	-0.136874	0.667184
8063156	CD40	rs6074022	0.000128948	39	0.00852863	-0.0619368	0.678049	0.99462	0.976131	-0.0116769	0.565532	0.977379	0.995292	20	46111557	C	T	0.2735	NM_001250	uc002xrg.2	46118271	+	230	rs745307	5.11667e-47	0.0973488	-0.092243	-0.0561232	0.608428
8015575	GHDC	rs9891119	0.000128983	40	0.00852863	-0.0312651	0.47858	0.968985	0.976131	0.0098214	0.519711	0.974744	0.995292	17	42355962	C	A	0.3265	NM_001142622	uc060fhk.1; uc002hzd.4; uc002hze.5; uc002hzf.5; uc060fhl.1; uc060fhm.1; uc060fhn.1; uc060fho.1; uc060fhp.1; uc060fhq.1; uc060fhr.1; uc060fhs.1	42194459; 42194195; 42194494; 42194484; 42194532; 42191070; 42194478; 42194502; 42194487; 42194513; 42194308; 42194494	-	306	rs1053004	8.03365e-05	0.668572	-0.0458261	-0.0220213	0.480541
8015575	GHDC	rs4796791	0.000128983	41	0.00852863	-0.0312651	0.47858	0.968985	0.976131	0.0098214	0.519711	0.974744	0.995292	17	42378745	A	G	0.3265	NM_001142622	uc060fhk.1; uc002hzd.4; uc002hze.5; uc002hzf.5; uc060fhl.1; uc060fhm.1; uc060fhn.1; uc060fho.1; uc060fhp.1; uc060fhq.1; uc060fhr.1; uc060fhs.1	42194459; 42194195; 42194494; 42194484; 42194532; 42191070; 42194478; 42194502; 42194487; 42194513; 42194308; 42194494	-	306	rs1053004	8.03365e-05	0.668572	-0.0458261	-0.0220213	0.480541
8102006	MANBA	rs228614	0.000132703	42	0.00856566	0.0387336	0.417132	0.968985	0.976131	-0.0151107	0.802882	0.998254	0.995292	4	102657480	G	A	0.5324	NM_005908	uc003hwg.4	102760994	-	19	rs223498	2.26248e-07	0.555849	-0.0548258	-0.00797419	0.145446
7897119	FAM213B	rs4648356	0.000141671	43	0.00893184	0.0475883	0.6093	0.99462	0.976131	0.0098242	0.948104	0.999408	0.995292	1	2792599	C	A	0.6716	NM_001195736	uc001ajv.3	2586749	+	273	rs67373773	1.28014e-07	0.286553	-0.0670719	-0.0266876	0.397896
8050766	ADCY3	rs4665719	0.000156235	44	0.00962621	0.103366	0.885053	0.998203	0.976131	0.00590678	0.0484435	0.944376	0.585308	2	24794991	G	A	0.2412	NM_004036	uc002rfs.5	24919839	-	136	rs13407913	2.12823e-29	0.219471	0.141912	-0.0106835	changes sign
7939839	PTPRJ	rs7120737	0.000169276	45	0.010198	0.0468156	0.282986	0.951976	0.976131	0.0180789	0.786425	0.998254	0.995292	11	47680843	G	A	0.1324	NM_002843	uc001ngp.5	47980560	+	5	MS risk SNP	NA	1
8063351	SLC9A8	rs17785991	0.000188322	46	0.0110987	0.033459	0.414987	0.968985	0.976131	0.0138384	0.86641	0.999408	0.995292	20	49822224	A	T	0.3265	NM_001260491	uc010zyj.3	49812712	+	309	rs73125642	3.83376e-05	0.0929102	0.0474811	0.0367765	0.774551
8038326	SLC6A16	rs2303759	0.000274796	47	0.0156279	0.0571061	0.620056	0.99462	0.976131	0.0143758	0.207403	0.962732	0.760565	19	49365794	C	A	0.2692	NM_014037	uc002pmz.4	49325225	-	15	rs11671438	2.10141e-07	0.162073	0.0801202	0.0408685	0.51009
7897648	PEX14	rs10492972	0.000276702	48	0.0156279	-0.0343212	0.109945	0.929176	0.976131	-0.0260933	0.823939	0.998254	0.995292	1	10293054	C	T	0.3006	NM_004565	uc001arn.5	10474886	+	8	MS risk SNP	NA	1
8110327	RGS14	rs4976646	0.000308833	49	0.0170867	0.0320254	0.157359	0.935905	0.976131	-0.0218689	0.481183	0.974744	0.995292	5	177361569	G	A	0.3095	NM_006480	uc003mgf.4	177357836	+	11	MS risk SNP	NA	1
8147019	ZC2HC1A	rs1520333	0.000349632	50	0.018957	-0.126459	0.22911	0.942254	0.976131	-0.0664883	0.783067	0.998254	0.995292	8	78488803	G	A	0.2735	NM_016010	uc003ybd.4	78666046	+	686	rs10092335	1.3116e-38	0.163381	-0.194548	-0.0263443	0.135413
8110327	RGS14	rs4075958	0.00036202	51	0.0192438	0.0331467	0.162727	0.935905	0.976131	-0.023	0.878576	0.999408	0.995292	5	177357511	A	G	0.2515	NM_006480	uc003mgf.4	177357836	+	11	rs4976646	0.000308833	0.751945	0.0493483	0.0443079	0.897862
8131967	HOXA-AS2	rs706015	0.000379781	52	0.0197998	0.0751694	0.330654	0.968985	0.976131	0.029398	0.95588	0.999408	0.995292	7	26975369	C	A	0.1824	ENST00000517635	uc064cfx.1	27115347	+	555	imm_7_27105081*	1.18163e-05	0.326306	0.104564	0.0564586	0.539944
8026971	IFI30	rs11554159	0.000429436	53	0.021702	-0.0218587	0.363342	0.968985	0.976131	0.0117206	0.0955042	0.944376	0.730319	19	18175134	G	A	0.7235	NM_006332	uc002nic.3	18173666	+	294	rs7259445	3.43625e-12	0.160029	0.0318852	0.0141443	0.4436
8038326	SLC6A16	rs8107548	0.000432278	54	0.021702	0.0564614	0.666075	0.99462	0.976131	0.012528	0.24638	0.962732	0.760565	19	49367386	G	A	0.2647	NM_014037	uc002pmz.4	49325225	-	15	8000869	2.10141e-07	0.156612	0.07924	0.0386251	0.487445
8015575	GHDC	rs744166	0.000491391	55	0.0242211	-0.0274643	0.39198	0.968985	0.976131	0.0122724	0.156501	0.952715	0.730319	17	42362183	G	A	0.3971	NM_001142622	uc060fhk.1; uc002hzd.4; uc002hze.5; uc002hzf.5; uc060fhl.1; uc060fhm.1; uc060fhn.1; uc060fho.1; uc060fhp.1; uc060fhq.1; uc060fhr.1; uc060fhs.1	42194459; 42194195; 42194494; 42194484; 42194532; 42191070; 42194478; 42194502; 42194487; 42194513; 42194308; 42194494	-	306	rs1053004	8.03365e-05	0.46284	-0.0401768	-0.0164307	0.408959
7956639	TSFM	rs201202118	0.000515947	56	0.0242695	0.0322793	0.406431	0.968985	0.976131	-0.0145672	0.819629	0.998254	0.995292	12	57788279	A	T	0.6964	NM_001172695	uc010ssf.3	57782760	+	421	rs2069502	0.00043619	0.97003
7897620	PGD	rs10492972	0.000528678	57	0.0242695	-0.0229542	0.823333	0.998203	0.976131	-0.00277823	0.900845	0.999408	0.995292	1	10293054	C	T	0.3006	NM_002631	uc001arc.4	10399079	+	9	MS risk SNP	NA	1
8048898	SP140	rs10201872	0.000533757	58	0.0242695	-0.0553335	0.660682	0.99462	0.976131	0.010208	0.228296	0.962732	0.760565	2	230242009	A	G	0.1824	NM_001005176	uc002vqj.4	230225763	+	226	rs13397985	0.000276855	0.960612
7982185	DEXI	rs7200786	0.000540824	59	0.0242695	-0.0647895	0.80345	0.998203	0.976131	0.00810376	0.268675	0.962732	0.763037	16	11083944	A	G	0.4941	NM_014015	uc002dal.4	10942460	-	983	rs6498135	7.46707e-09	0.202924	-0.096637	-0.0355926	0.368312
7986685	DEXI	rs7200786	0.000540824	60	0.0242695	-0.0647895	0.80345	0.998203	0.976131	0.00810376	0.268675	0.962732	0.763037	16	11083944	A	G	0.4941	NM_014015	uc002dal.4	10942460	-	983	rs6498135	7.46707e-09	0.202924	-0.096637	-0.0355926	0.368312
8034021	CDC37	rs8112449	0.000546086	61	0.0242695	-0.0222543	0.573351	0.99462	0.976131	-0.0071324	0.875427	0.999408	0.995292	19	10409388	G	A	0.6353	NM_007065	uc002mof.2	10403533	-	233	MS risk SNP	NA	1
7999419	DEXI	rs7200786	0.000570182	62	0.0249317	-0.0645313	0.0264504	0.908035	0.625993	0.074631	0.524123	0.974744	0.995292	16	11083944	A	G	0.4941	NM_014015	uc002dal.4	10942460	-	983	rs794428	0.000479172	0.363791	-0.0962387	-0.054968	0.571163
8007976	NPEPPS	rs4794058	0.000690714	63	0.0293103	0.0352893	0.995744	0.999431	0.995744	-9.77411e-05	0.932716	0.999408	0.995292	17	47519732	A	G	0.503	NM_006310	uc002ilr.5	47531063	+	22	rs9901869	0.000431253	0.934733
8138789	JAZF1	rs917116	0.000692025	64	0.0293103	-0.0689041	0.399894	0.968985	0.976131	0.0331637	0.141024	0.948749	0.730319	7	28133120	C	A	0.2529	NM_175061	uc003szn.4	28180743	-	219	rs849326	1.84832e-09	0.0347287	-0.102998	-0.0608306	0.590598
8042381	PNO1	rs7595717	0.000705374	65	0.0293103	0.0521373	0.330811	0.968985	0.976131	0.0248821	0.11672	0.944376	0.730319	2	68360345	A	G	0.2647	NM_020143	uc002seh.5	68157843	+	300	rs17035173	4.98814e-18	0.181531	0.073323	0.0086351	0.117768
7934477	CAMK2G	rs2688608	0.000713567	66	0.0293103	-0.0262647	0.413398	0.968985	0.976131	0.0125904	0.983055	0.999408	0.995292	10	73898591	A	C	0.6147	NM_001204492	uc057uej.1; uc057uei.1; uc057uek.1; uc057ueh.1; uc057uem.1; uc057uee.1; uc057uef.1; uc057ueg.1; uc001jvr.3; uc001jvt.3; uc001jvo.3; uc001jvm.2; uc001jvs.2; uc057uec.1	73817782; 73842211; 73848012; 73848018; 73852816; 73860854; 73874461; 73874502; 73874519; 73874554; 73874580; 73874591; 73874591; 73874591	-	6	MS risk SNP	NA	1
8105067	PTGER4	rs6880778	0.000730954	67	0.0295763	-0.0526185	0.229642	0.942254	0.976131	0.0412551	0.974605	0.999408	0.995292	5	40398994	G	A	0.5412	NM_000958	uc003jlz.5	40679497	+	643	rs10941504	0.000331908	0.356167	0.0779827	0.0436288	0.559468
7956639	TSFM	rs703842	0.00101807	68	0.0405881	0.0303462	0.38716	0.968985	0.976131	-0.0151689	0.758984	0.998254	0.995292	12	57768956	A	G	0.6882	NM_001172695	uc010ssf.3	57782760	+	421	rs2069502	0.00043619	0.95666
8007976	NPEPPS	rs4239162	0.00106817	69	0.0419681	0.0332167	0.957921	0.998203	0.976131	0.000980805	0.995292	0.999691	0.995292	17	47678444	G	A	0.5059	NM_006310	uc002ilr.5	47531063	+	22	rs9901869	0.000431253	0.913426
7941004	CCDC88B	rs694739	0.00118325	70	0.0458257	0.0238502	0.368123	0.968985	0.976131	-0.0125912	0.526936	0.974744	0.995292	11	64329761	A	G	0.6382	NM_032251	uc001nzy.4	64340222	+	18	rs645078	0.000633319	0.743867	-0.0340047	-0.0128109	0.623261
8083677	SCHIP1	rs1014486	0.0012757	71	0.0487104	0.0439456	0.851695	0.998203	0.976131	-0.00434314	0.158948	0.953651	0.730319	3	159973324	G	A	0.4559	NM_001197107	uc003fcu.3; uc062pmk.1; uc062pml.1; uc062pmm.1; uc062pmn.1; uc062pmo.1; uc062pmp.1; uc062pmq.1	159839860; 159839937; 159839939; 159840059; 159840098; 159852938; 159852991; 159888791	+	296	MS risk SNP	NA	1
7956613	TSPAN31	rs12368653	0.00173307	72	0.0652548	0.031007	0.373225	0.968985	NA	0.0164595	0.369092	0.970201	NA	12	57739473	A	G	0.4765	NM_005981	uc001spt.4	57744880	+		*imm_7_27105081 is the name assigned to the SNP on the Immunochip
7956648	XRCC6BP1	rs12368653	0.00184442	73	0.0684961	0.0906558	0.0976437	0.929176	NA	0.0893296	0.656142	0.985816	NA	12	57739473	A	G	0.4765	XM_005269223	uc058qeg.1; uc001sqp.4; uc058qeh.1; uc058qei.1	57941540; 57941576; 57941795; 57949740	+		(based on its NCBI36/hg18 position), but there is no SNP
8034034	KEAP1	rs8112449	0.00208055	74	0.0762213	0.0335239	0.609298	0.99462	NA	0.00945706	0.128321	0.944376	NA	19	10409388	G	A	0.6353	NM_012289	uc002moq.2	10502896	-		at this position in the UCSC genome browswer
7959574	SETD8	rs7132277	0.00211607	75	0.0764889	0.0381069	0.0592237	0.908035	NA	-0.033983	0.289472	0.962732	NA	12	123108835	A	G	0.1941	NM_020382	uc001uew.4	123383772	+
7904293	PTGFRN	rs1335532	0.00214745	76	0.0766018	-0.0809355	0.0674658	0.908035	NA	0.0698282	0.208918	0.962732	NA	1	116558335	A	G	0.8647	NM_020440	uc001egv.2	116910056	+
8138708	HOXA1	rs706015	0.00219009	77	0.0771083	0.0699108	0.881657	0.998203	NA	0.00546483	0.0184671	0.907602	NA	7	26975369	C	A	0.1824	S79869	uc003sye.4; uc003syd.4	27095974; 27095996	-
7928471	ADK	rs2688608	0.00242451	78	0.0842672	-0.12468	0.613065	0.99462	NA	0.0389393	0.745279	0.998254	NA	10	73898591	A	C	0.6147	NM_001123	uc001jwj.4	74176685	+
7972973	SETD8	rs1790100	0.00252721	79	0.0867249	-0.0504852	0.0723974	0.908035	NA	0.046272	0.812866	0.998254	NA	12	123172178	G	T	0.2324	AF287261	uc058usx.1; uc001uew.4; uc058usy.1; uc058usz.1; uc058uta.1; uc058utb.1; uc058utc.1; uc058utd.1; uc058ute.1	123383772; 123383772; 123384165; 123384172; 123388899; 123389270; 123389482; 123390041; 123391379	+
7999435	PRM2	rs6498184	0.00258215	80	0.0869029	-0.0434546	0.377322	0.968985	NA	-0.0204988	0.774574	0.998254	NA	16	11342133	G	A	0.8235	NM_001286356	uc002dau.2; uc032drg.2	11276480; 11276480	-
7897128	ACTRT2	rs3748817	0.00260176	81	0.0869029	-0.0389409	0.175181	0.942254	NA	0.029778	0.983935	0.999408	NA	1	2594226	A	G	0.6559	NM_080431	uc001ajz.4	3021482	+
7952022	AMICA1	rs533646	0.00262856	82	0.0869029	0.0213225	0.0724875	0.908035	NA	0.0223839	0.41758	0.974744	NA	11	118696037	G	C	0.6607	NM_001098526	uc001psk.3	118225094	-
7906613	SLAMF7	rs35967351	0.00279469	83	0.0908697	0.115541	0.960837	0.998203	NA	0.00311225	0.88141	0.999408	NA	1	160742014	A	T	0.6706	NM_001282591	uc010pjp.4	160739056	+
8077099	SCO2	rs470119	0.00281559	84	0.0908697	-0.0460459	0.861991	0.998203	NA	0.00434959	0.0460148	0.944376	NA	22	50528485	A	G	0.3882	NM_001169109	uc021wsa.2	50526439	-
7967412	CDK2AP1	rs949143	0.00298863	85	0.0953198	-0.0395153	0.533292	0.976861	NA	-0.0149989	0.658726	0.985816	NA	12	123110616	G	A	0.3176	NM_001270433	uc031qjy.2; uc001ueq.5; uc058usm.1; uc058usn.1; uc058uso.1; uc058usp.1; uc058usr.1	123268254; 123272140; 123269239; 123271141; 123268077; 123272334; 123268284	-
7956648	XRCC6BP1	rs201202118	0.00319577	86	0.100741	0.0892239	0.060197	0.908035	NA	0.10443	0.75178	0.998254	NA	12	57788279	A	T	0.6964	XM_005269223	uc058qeg.1; uc001sqp.4; uc058qeh.1; uc058qei.1	57941540; 57941576; 57941795; 57949740	+
7956639	TSFM	rs12368653	0.00336383	87	0.10482	0.026297	0.353538	0.968985	NA	-0.0164827	0.0536901	0.944376	NA	12	57739473	A	G	0.4765	NM_001172695	uc010ssf.3	57782760	+
7904293	PTGFRN	rs2300747	0.00375246	88	0.115601	-0.0755261	0.0731744	0.908035	NA	0.0718504	0.350499	0.970201	NA	1	116561593	A	G	0.8676	NM_020440	uc001egv.2	116910056	+
7967337	ABCB9	rs7132277	0.00392585	89	0.119584	0.0392694	0.829431	0.998203	NA	0.00418193	0.23197	0.962732	NA	12	123108835	A	G	0.1941	NM_001243014	uc021rfo.2	122966460	-
8053733	SETD8	rs7132277	0.00423092	90	0.127445	0.0389412	0.474428	0.968985	NA	-0.0137607	0.415299	0.974744	NA	12	123108835	A	G	0.1941	NM_020382	uc001uew.4	123383772	+
8077123	CPT1B	rs470119	0.00446823	91	0.132784	-0.036574	0.875155	0.998203	NA	-0.00359271	0.91924	0.999408	NA	22	50528485	A	G	0.3882	NM_001145134	uc062fnl.1	50577915	-
8044417	TMEM87B	rs17174870	0.00450614	92	0.132784	-0.0498991	0.452336	0.968985	NA	0.021293	0.30165	0.962732	NA	2	111907624	G	A	0.7618	NM_032824	uc002thm.2	112055222	+
7904293	PTGFRN	rs6677309	0.00476523	93	0.138909	-0.0760798	0.0955829	0.929176	NA	0.0711799	0.386438	0.974744	NA	1	116537544	A	C	0.8728	NM_020440	uc001egv.2	116910056	+
7959574	SETD8	rs949143	0.00486389	94	0.140277	0.0297723	0.137879	0.934639	NA	-0.0268695	0.999008	0.999691	NA	12	123110616	G	A	0.3176	NM_020382	uc001uew.4	123383772	+
8102065	BDH2	rs7665090	0.00568925	95	0.159781	0.068105	0.107193	0.929176	NA	-0.0640079	0.498022	0.974744	NA	4	102630446	G	A	0.5235	NM_020139	uc003hwz.4	103099883	-
8040552	NCOA1	rs4665719	0.00569186	96	0.159781	0.0216474	0.210091	0.942254	NA	-0.0178838	0.436674	0.974744	NA	2	24794991	G	A	0.2412	NM_003743	uc061hdc.1	24584476	+
8064098	RNU6-994P	rs6062314	0.00571698	97	0.159781	0.174457	0.376467	0.968985	NA	-0.0595106	0.762819	0.998254	NA	20	63778360	A	G	0.91471	ENST00000410507	uc061yma.1	63337338	+
8067722	STMN3	rs6062314	0.00620665	98	0.170228	0.0519207	0.232663	0.942254	NA	-0.0240654	0.566448	0.977379	NA	20	63778360	A	G	0.91471	NM_001276310	uc031ruo.1	63652766	-
7897128	ACTRT2	rs4648356	0.00621638	99	0.170228	-0.0354135	0.241545	0.942651	NA	0.0264632	0.58536	0.979575	NA	1	2792599	C	A	0.6716	NM_080431	uc001ajz.4	3021482	+
8003210	C16orf74	rs13333054	0.00652202	100	0.175392	0.0429789	0.140173	0.935905	NA	-0.0363138	0.941237	0.999408	NA	16	85977427	A	G	0.2235	ENST00000602583	uc059xzr.1	85710850	-
8053733	SETD8	rs1790100	0.00653436	101	0.175392	0.0361307	0.613746	0.99462	NA	-0.0102586	0.795347	0.998254	NA	12	123172178	G	T	0.2324	NM_020382	uc001uew.4	123383772	+
8044450	ZC3H6	rs17174870	0.00696086	102	0.185009	0.0374985	0.345953	0.968985	NA	0.0215843	0.857997	0.999383	NA	2	111907624	G	A	0.7618	NM_198581	uc002thq.2	112275593	+
7999419	DEXI	rs4780346	0.00715373	103	0.188289	-0.0559688	0.0915566	0.926156	NA	0.0602545	0.984541	0.999408	NA	16	11194949	A	G	0.2618	NM_014015	uc002dal.4	10942460	-
7964535	CYP27B1	rs201202118	0.00742677	104	0.193596	0.0299305	0.937508	0.998203	NA	-0.00151907	0.836357	0.998254	NA	12	57788279	A	T	0.6964	NM_000785	uc001spz.2	57767251	-
8115562	RNF145	rs2546890	0.00769829	105	0.198763	0.0382472	0.129082	0.932519	NA	0.0387144	0.57187	0.977379	NA	5	159332892	A	G	0.497	NM_001199380	uc010jiq.3	159210053	-
8053733	SETD8	rs949143	0.00788657	106	0.201703	0.0298035	0.751525	0.99578	NA	-0.00636467	0.505254	0.974744	NA	12	123110616	G	A	0.3176	NM_020382	uc001uew.4	123383772	+
7964499	AGAP2	rs12368653	0.00833074	107	0.211071	-0.0253909	0.823052	0.998203	NA	-0.00409149	0.501352	0.974744	NA	12	57739473	A	G	0.4765	NM_001122772	uc001spq.4	57738246	-
8064098	RNU6-994P	rs2256814	0.00850255	108	0.21343	0.129015	0.266065	0.951976	NA	-0.0739392	0.988042	0.999408	NA	20	63742630	A	G	0.2088	ENST00000410507	uc061yma.1	63337338	+
7964535	CYP27B1	rs703842	0.00867522	109	0.215766	0.0289462	0.923236	0.998203	NA	-0.0018302	0.801088	0.998254	NA	12	57768956	A	G	0.6882	NM_000785	uc001spz.2	57767251	-
7956613	TSPAN31	rs703842	0.00913681	110	0.223425	0.0261983	0.279555	0.951976	NA	0.0205663	0.626209	0.985816	NA	12	57768956	A	G	0.6882	NM_005981	uc001spt.4	57744880	+
7956648	XRCC6BP1	rs703842	0.00917853	111	0.223425	0.0787334	0.0732318	0.908035	NA	0.100954	0.68648	0.994448	NA	12	57768956	A	G	0.6882	XM_005269223	uc058qeg.1; uc001sqp.4; uc058qeh.1; uc058qei.1	57941540; 57941576; 57941795; 57949740	+
8102006	MANBA	rs7665090	0.0092304	112	0.223425	0.0275199	0.288176	0.951976	NA	-0.0195147	0.958584	0.999408	NA	4	102630446	G	A	0.5235	NM_005908	uc003hwg.4	102760994	-
7956613	TSPAN31	rs201202118	0.00972282	113	0.231517	0.0264451	0.27281	0.951976	NA	0.0206459	0.621877	0.985816	NA	12	57788279	A	T	0.6964	NM_005981	uc001spt.4	57744880	+
7944375	TRAPPC4	rs523604	0.00982588	114	0.231517	-0.0495907	0.859467	0.998203	NA	-0.00625356	0.148639	0.952715	NA	11	118885029	A	G	0.5353	NM_016146	uc010ryo.4	119018431	+
7934513	AP3M1	rs2688608	0.00988775	115	0.231517	-0.0178608	0.505581	0.972686	NA	0.00830809	0.399321	0.974744	NA	10	73898591	A	C	0.6147	NM_012095	uc057uew.1; uc057uex.1; uc001jwg.4; uc001jwh.4	74130004; 74150757; 74150842; 74151063	-
7972973	SETD8	rs949143	0.0099063	116	0.231517	-0.0384206	0.113541	0.929176	NA	0.0401066	0.823396	0.998254	NA	12	123110616	G	A	0.3176	AF287261	uc058usx.1; uc001uew.4; uc058usy.1; uc058usz.1; uc058uta.1; uc058utb.1; uc058utc.1; uc058utd.1; uc058ute.1	123383772; 123383772; 123384165; 123384172; 123388899; 123389270; 123389482; 123390041; 123391379	+
7928395	FUT11	rs2688608	0.0100548	117	0.232978	0.0210965	0.923033	0.998203	NA	-0.00147681	0.210411	0.962732	NA	10	73898591	A	C	0.6147	NM_001284194	uc001juz.3	73772290	+
8042159	RNA5SP95	rs842639	0.010174	118	0.233744	-0.0386485	0.098512	0.929176	NA	-0.0454045	0.452431	0.974744	NA	2	60868110	A	G	0.6294	ENST00000410319	uc061jlp.1	60998751	+
7996805	RNU4-36P	rs1886700	0.0104646	119	0.2384	0.0575242	0.238438	0.942254	NA	0.0345917	0.49708	0.974744	NA	16	68652002	A	G	0.1382	ENST00000364294	uc059wgw.1	68535514	+
8008887	RPS6KB1	rs8070345	0.0105532	120	0.238414	-0.0228563	0.305139	0.966392	NA	0.0198332	0.389983	0.974744	NA	17	59739396	A	G	0.5059	NM_001272042	uc010won.4	59893129	+
8105063	RNU1-150P	rs4613763	0.0107152	121	0.240074	-0.0617922	0.978851	0.999121	NA	-0.000632178	0.360607	0.970201	NA	5	40392626	G	A	0.09412	ENST00000362491	uc021xxq.1	40269557	+
8015681	CCR10	rs744166	0.0109099	122	0.242433	0.0373635	0.324947	0.968985	NA	0.0248287	0.581055	0.978581	NA	17	42362183	G	A	0.3971	NM_016602	uc002iax.5	42681843	-
7934690	ZCCHC24	rs1250550	0.0111926	123	0.243852	0.0373974	0.36965	0.968985	NA	-0.0214573	0.456478	0.974744	NA	10	79300560	A	C	0.3588	NM_153367	uc001kak.4	79445627	-
7952046	MPZL2	rs533646	0.0112329	124	0.243852	0.0855569	0.233288	0.942254	NA	0.0679598	0.541709	0.974744	NA	11	118696037	G	C	0.6607	NM_144765	uc001pso.4	118264536	-
7959574	SETD8	rs1790100	0.0112436	125	0.243852	0.0305123	0.093772	0.929176	NA	-0.0302031	0.699114	0.998254	NA	12	123172178	G	T	0.2324	NM_020382	uc001uew.4	123383772	+
7967337	ABCB9	rs1790100	0.0114511	126	0.2447	0.0331941	0.67936	0.99462	NA	0.00773961	0.0840175	0.944376	NA	12	123172178	G	T	0.2324	NM_001243014	uc021rfo.2	122966460	-
7956551	ARHGEF25	rs201202118	0.0114632	127	0.2447	-0.031765	0.0488535	0.908035	NA	0.0462828	0.126277	0.944376	NA	12	57788279	A	T	0.6964	NM_001111270	uc009zpy.5	57610179	+
8074806	PPM1F	rs2283792	0.0117272	128	0.247647	-0.0267541	0.470069	0.968985	NA	-0.0146692	0.356068	0.970201	NA	22	21776836	C	A	0.5	NM_014634	uc002zvp.3	21952837	-
7934459	NDST2	rs2688608	0.0118046	129	0.247647	0.0223409	0.714603	0.995524	NA	0.00615494	0.0847499	0.944376	NA	10	73898591	A	C	0.6147	NM_003635	uc001jvk.3	73811584	-
8091737	IFT80	rs2243123	0.0118754	130	0.247647	-0.0420543	0.793135	0.996843	NA	0.00741542	0.858323	0.999383	NA	3	159991864	G	A	0.3	NM_001190241	uc003fde.3	160399273	-
8035177	SLC35E1	rs1870071	0.0125241	131	0.258127	0.0219173	0.949116	0.998203	NA	0.00102963	0.556656	0.976014	NA	19	16394295	G	A	0.2882	ENST00000409648	uc060uzs.1	16571536	-
7960529	SCNN1A	rs12296430	0.0125683	132	0.258127	0.0312682	0.234981	0.942254	NA	0.0221574	0.305169	0.962732	NA	12	6394334	C	G	0.2235	NM_001038	uc001qnx.4	6375549	-
7953943	GABARAPL1	rs11052877	0.0126719	133	0.258298	0.0382028	0.860543	0.998203	NA	0.00449929	0.924292	0.999408	NA	12	9753094	G	A	0.3882	NM_031412	uc001qxs.4	10212804	+
8125993	ETV7	rs941816	0.0127974	134	0.258909	-0.0544215	0.329405	0.968985	NA	-0.0335501	0.917517	0.999408	NA	6	36407527	G	A	0.1912	NM_001207035	uc003olz.3	36387566	-
8125959	SLC26A8	rs941816	0.013319	135	0.266643	-0.0705376	0.614689	0.99462	NA	0.0254002	0.0180096	0.907602	NA	6	36407527	G	A	0.1912	NM_138718	uc003oll.4	36024493	-
8066953	SPATA2	rs17785991	0.0133764	136	0.266643	0.0328192	0.39447	0.968985	NA	0.0203051	0.227059	0.962732	NA	20	49822224	A	T	0.3265	NM_001135773	uc010gie.5	49913739	-
8110318	PRELID1	rs4976646	0.0137269	137	0.271633	-0.0255379	0.620449	0.99462	NA	0.00949246	0.354539	0.970201	NA	5	177361569	G	A	0.3095	NM_001271828	uc021yiq.3	177303820	+
8114691	HDAC3	rs35952555	0.0144652	138	0.284167	0.0225486	0.0260692	0.908035	NA	-0.0338084	0.874861	0.999408	NA	5	142126991	C	A	0.6029	NM_003883	uc003llf.3	141636870	-
8017148	RNU6-450P	rs8070345	0.0148357	139	0.28935	-0.0489003	0.193676	0.942254	NA	-0.059242	0.986267	0.999408	NA	17	59739396	A	G	0.5059	ENST00000364654	uc060ieg.1	59847544	-
7928408	ZSWIM8	rs2688608	0.0152453	140	0.295215	0.0296518	0.0176476	0.908035	NA	0.0534076	0.0541399	0.944376	NA	10	73898591	A	C	0.6147	ENST00000446546	uc057udc.1	73785654	+
7956551	ARHGEF25	rs703842	0.0156864	141	0.300533	-0.0293302	0.0465683	0.908035	NA	0.0471388	0.116913	0.944376	NA	12	57768956	A	G	0.6882	NM_001111270	uc009zpy.5	57610179	+
8131179	TTYH3	rs1843938	0.0157417	142	0.300533	0.0223876	0.776842	0.99578	NA	0.00500891	0.549796	0.974744	NA	7	3073400	A	G	0.4324	NM_025250	uc003smp.4	2631950	+
8008885	MIR21	rs180515	0.0159202	143	0.301816	0.0943356	0.128979	0.932519	NA	0.11393	0.70273	0.998254	NA	17	59946914	G	A	0.35	NR_029493	uc002ixv.3	59841265	+
7947828	MYBPC3	rs7120737	0.0164485	144	0.308615	0.0294218	0.232775	0.942254	NA	0.0201131	0.0577338	0.944376	NA	11	47680843	G	A	0.1324	NM_000256	uc058bdz.1	47352702	-
7961075	CD69	rs11052877	0.0165367	145	0.308615	0.0973122	0.565446	0.99462	NA	-0.0380925	0.169178	0.962732	NA	12	9753094	G	A	0.3882	NM_001781	uc001qwk.3	9760901	-
7897257	RNF207	rs3007421	0.0166203	146	0.308615	-0.0428334	0.645654	0.99462	NA	0.0108411	0.653045	0.985816	NA	1	6470129	A	G	0.1294	ENST00000466994	uc057btl.1	6205474	+
7991932	FAM195A	rs2744148	0.0178946	147	0.330016	0.0366121	0.279252	0.951976	NA	0.0223686	0.263722	0.962732	NA	16	1023552	G	A	0.1559	ENST00000307650	uc002cic.2	641812	+
7960438	ANO2	rs12296430	0.0184156	148	0.335143	0.0417289	0.438864	0.968985	NA	-0.0214922	0.0917	0.944376	NA	12	6394334	C	G	0.2235	XM_006718991	uc058kbi.1; uc058kbj.1; uc058kbk.1; uc058kbl.1; uc058kbm.1; uc058kbn.1; uc058kbo.1; uc058kbp.1; uc058kbq.1; uc058kbr.1; uc058kbs.1; uc058kbt.1	5563337; 5945259; 5946232; 5946232; 5564638; 5615295; 5739968; 5733180; 5741123; 5741111; 5870436; 5881806	-
7960464	VWF	rs1800693	0.0185934	149	0.335143	-0.0324937	0.100108	0.929176	NA	0.0421443	0.164862	0.957749	NA	12	6330843	G	A	0.45	NM_000552	uc001qnn.2	6124675	-
7921237	FCRL5	rs3761959	0.0186042	150	0.335143	0.0339423	0.827559	0.998203	NA	0.00545922	0.288311	0.962732	NA	1	157699488	G	A	0.5559	NM_001195388	uc057mei.1; uc001fqu.3; uc057mej.1; uc057mek.1; uc057mel.1; uc010phv.2; uc001fqv.2; uc057mem.1	157516073; 157552520; 157522794; 157528669; 157519076; 157552455; 157552455; 157552467	-
7903391	NA	rs7552544	0.0186672	151	0.335143	-0.0377539	0.472007	0.968985	NA	-0.0201943	0.37432	0.970201	NA	1	100775337	A	G	0.5828	NA	uc057iru.1	101133152	+
7975772	ZC2HC1C	rs2300603	0.0193656	152	0.344781	-0.0353264	0.700776	0.995524	NA	0.00925983	0.293687	0.962732	NA	14	75539214	A	G	0.7456	NM_024643	uc001xrh.5	75069279	+
7999431	PRM3	rs6498184	0.0194583	153	0.344781	0.0350479	0.529962	0.975333	NA	-0.0146266	0.282852	0.962732	NA	16	11342133	G	A	0.8235	NM_021247	uc002dat.3	11273641	-
7980603	RNU6-835P	rs2119704	0.0197214	154	0.347173	-0.0520936	0.336223	0.968985	NA	0.0270713	0.731154	0.998254	NA	14	88021345	C	A	0.91471	ENST00000516974	uc021rxg.1	87996448	-
7952103	DDX6	rs533646	0.0198579	155	0.347322	0.0220116	0.062913	0.908035	NA	0.0327578	0.219912	0.962732	NA	11	118696037	G	C	0.6607	NM_001257191	uc031ygs.2	118790948	-
8042195	AHSA2	rs842639	0.0200351	156	0.348174	-0.0274714	0.911872	0.998203	NA	-0.00247784	0.727104	0.998254	NA	2	60868110	A	G	0.6294	NM_152392	uc002sbb.4	61177417	+
7985934	SEMA4B	rs8042861	0.0202012	157	0.348825	-0.0228493	0.895866	0.998203	NA	0.00243695	0.820202	0.998254	NA	15	90434101	A	C	0.4588	NM_020210	uc002boy.4	90184962	+
8067812	LKAAEAR1	rs6062314	0.0210334	158	0.360896	0.0413908	0.802039	0.998203	NA	0.00475686	0.793719	0.998254	NA	20	63778360	A	G	0.91471	NM_001007125	uc002yie.1	64084359	-
8105063	RNU1-150P	rs6880778	0.0212002	159	0.361471	-0.0273538	0.82978	0.998203	NA	0.0051779	0.0415822	0.944376	NA	5	40398994	G	A	0.5412	ENST00000362491	uc021xxq.1	40269557	+
8040614	RN7SL856P	rs4665719	0.0216277	160	0.366454	0.0368566	0.0185059	0.908035	NA	-0.0621031	0.0729474	0.944376	NA	2	24794991	G	A	0.2412	ENST00000461754	uc061her.1	25058031	+
8003210	C16orf74	rs17445836	0.0221371	161	0.370471	0.0373646	0.12697	0.932519	NA	-0.0376924	0.0931184	0.944376	NA	16	85984057	G	A	0.7874	ENST00000602583	uc059xzr.1	85710850	-
7917726	RNU4-59P	rs11810217	0.0221381	162	0.370471	0.0570596	0.258363	0.951976	NA	0.0420137	0.897573	0.999408	NA	1	92682820	A	G	0.2706	ENST00000364447	uc057ihx.1	92700934	-
7952243	C1QTNF5	rs523604	0.0225877	163	0.375676	0.0205364	0.637023	0.99462	NA	0.0079214	0.110484	0.944376	NA	11	118885029	A	G	0.5353	NM_001278431	uc058iiv.2; uc284mzs.1; uc058iiu.2; uc284mzt.1	119340883; 119340567; 119340798; 119340940	-
8000811	MAPK3	rs7204270	0.0230222	164	0.380568	-0.0223211	0.476508	0.968985	NA	-0.0131968	0.286144	0.962732	NA	16	30145642	G	A	0.5265	NM_001040056	uc032dxc.2	30123209	-
8089970	ILDR1	rs2255214	0.0236514	165	0.386525	0.0223153	0.912684	0.998203	NA	0.00220809	0.445581	0.974744	NA	3	122051692	C	A	0.5147	NM_001199799	uc003ees.4	122022204	-
8015511	DHX58	rs744166	0.0236677	166	0.386525	-0.0349396	0.864137	0.998203	NA	0.00486527	0.449181	0.974744	NA	17	42362183	G	A	0.3971	NM_024119	uc002hyw.5	42112733	-
8114787	GNPDA1	rs35952555	0.0242985	167	0.394451	0.037919	0.545504	0.987884	NA	0.0149044	0.480836	0.974744	NA	5	142126991	C	A	0.6029	NM_005471	uc010jgh.4	142013031	-
7908650	IGFN1	rs7522462	0.0246586	168	0.397913	0.0327246	0.0666505	0.908035	NA	-0.0419219	0.553692	0.974744	NA	1	200912467	G	A	0.7176	NM_001164586	uc001gwc.3	201190824	+
8007263	HSD17B1	rs744166	0.0248801	169	0.399112	-0.0264891	0.463383	0.968985	NA	-0.0151162	0.257441	0.962732	NA	17	42362183	G	A	0.3971	NM_000413	uc002hzw.4	42549213	+
8047265	C2orf47	rs281783	0.0259704	170	0.414151	0.0332287	0.828381	0.998203	NA	0.00444312	0.82347	0.998254	NA	2	199886859	A	G	0.8118	NM_024520	uc002uvm.4	199955316	+
8102065	BDH2	rs228614	0.0263406	171	0.417599	0.0565095	0.127201	0.932519	NA	-0.0610991	0.483976	0.974744	NA	4	102657480	G	A	0.5324	NM_020139	uc003hwz.4	103099883	-
7999468	LITAF	rs6498184	0.0266223	172	0.419611	-0.12384	0.451005	0.968985	NA	-0.0604791	0.358478	0.970201	NA	16	11342133	G	A	0.8235	NM_001136472	uc002dbb.4	11586950	-
7952116	BCL9L	rs523604	0.0270574	173	0.423509	-0.0293567	0.699604	0.995524	NA	-0.00903594	0.671229	0.987894	NA	11	118885029	A	G	0.5353	NM_182557	uc001pug.5	118910904	-
8063380	RNU6-147P	rs17785991	0.027182	174	0.423509	-0.0386593	0.445164	0.968985	NA	-0.0220558	0.14974	0.952715	NA	20	49822224	A	T	0.3265	ENST00000383983	uc061xqz.1	49972105	+
7923233	KIF21B	rs12122721	0.0277433	175	0.429783	-0.0293763	0.627252	0.99462	NA	0.0101241	0.272392	0.962732	NA	1	201015352	G	A	0.7029	NM_001252100	uc001gvs.3	201023700	-
8126018	STK38	rs941816	0.0285411	176	0.439631	-0.0186697	0.504657	0.972686	NA	-0.0085026	0.86682	0.999408	NA	6	36407527	G	A	0.1912	NM_007271	uc003omh.3	36547470	-
7969815	CLYBL	rs4772201	0.0288364	177	0.441669	0.0580283	0.666281	0.99462	NA	0.0126324	0.98588	0.999408	NA	13	99434005	A	G	0.8118	NM_206808	uc001vok.5	99606695	+
8058091	SATB2	rs281783	0.0292121	178	0.44491	-0.0474148	0.861333	0.998203	NA	-0.00530368	0.377201	0.970201	NA	2	199886859	A	G	0.8118	NM_001172509	uc002uuy.2	199458096	-
8089261	CBLB	rs2028597	0.029424	179	0.445217	-0.0547317	0.844175	0.998203	NA	-0.00448162	0.128889	0.944376	NA	3	105839993	G	A	0.92941	XM_006713797	uc062mdc.1; uc003dwc.4; uc062mdd.1; uc003dwa.4; uc003dwe.3; uc003dwd.3; uc062mde.1; uc062mdf.1; uc062mdg.1	105702201; 105869043; 105673993; 105682130; 105869043; 105869043; 105869422; 105869422; 105869552	-
7906688	PPOX	rs35967351	0.029634	180	0.445217	-0.0228727	0.63578	0.99462	NA	-0.00865995	0.645909	0.985816	NA	1	160742014	A	T	0.6706	NM_000309	uc001fyg.3	161166409	+
7911767	MMEL1	rs3748817	0.029725	181	0.445217	0.0266742	0.906127	0.998203	NA	0.0024091	0.726993	0.998254	NA	1	2594226	A	G	0.6559	NM_033467	uc001ajy.3	2632990	-
8044415	RN7SL297P	rs17174870	0.031256	182	0.459266	0.0491407	0.700808	0.995524	NA	-0.0131924	0.922442	0.999408	NA	2	111907624	G	A	0.7618	ENST00000483161	uc021vmv.2	111930174	+
7908650	IGFN1	rs55838263	0.0312831	183	0.459266	0.0317728	0.0682298	0.908035	NA	-0.0416902	0.570666	0.977379	NA	1	200905600	A	G	0.7118	NM_001164586	uc001gwc.3	201190824	+
7925996	FBXO18	rs3118470	0.0312912	184	0.459266	-0.0199417	0.122256	0.930133	NA	-0.0253617	0.843507	0.998254	NA	10	6059750	G	A	0.3294	NM_001258452	uc057rkw.1; uc057rkx.1; uc057rky.1; uc057rkv.1; uc057rkz.1; uc057rla.1; uc057rlb.1; uc057rld.1; uc057rle.1; uc057rlf.1; uc057rlg.1; uc057rlc.1; uc057rli.1; uc001iis.5; uc001iit.5; uc057rku.1	5890279; 5903165; 5906505; 5890247; 5914177; 5917061; 5921345; 5923570; 5925263; 5925410; 5925410; 5921353; 5936632; 5890230; 5894385; 5890202	+
8108861	NDFIP1	rs35952555	0.0314971	185	0.459266	-0.0242922	0.907423	0.998203	NA	0.00204878	0.972578	0.999408	NA	5	142126991	C	A	0.6029	NM_030571	uc003lmi.5	142108504	+
8033892	ANGPTL6	rs34536443	0.0316476	186	0.459266	-0.0588164	0.789543	0.996634	NA	-0.00500444	0.410679	0.974744	NA	19	10352442	C	G	0.97041	NM_031917	uc002mmy.2	10102796	-
8082003	EAF2	rs2255214	0.0316794	187	0.459266	-0.0238534	0.83838	0.998203	NA	-0.00438176	0.772813	0.998254	NA	3	122051692	C	A	0.5147	NM_018456	uc003een.4	121835214	+
8025672	SLC44A2	rs34536443	0.0320261	188	0.460806	-0.088714	0.928089	0.998203	NA	-0.00257877	0.882998	0.999408	NA	19	10352442	C	G	0.97041	ENST00000586078	uc002mpg.2	10625524	+
8014891	IKZF3	rs12946510	0.0321256	189	0.460806	-0.0480972	0.502189	0.972686	NA	-0.026693	0.629797	0.985816	NA	17	39756124	A	G	0.4912	NM_001257408	uc002htd.5	39864188	-
7921237	FCRL5	rs2050568	0.0329702	190	0.468197	0.0318084	0.829525	0.998203	NA	0.0054253	0.232099	0.962732	NA	1	157800451	G	A	0.5325	NM_001195388	uc057mei.1; uc001fqu.3; uc057mej.1; uc057mek.1; uc057mel.1; uc010phv.2; uc001fqv.2; uc057mem.1	157516073; 157552520; 157522794; 157528669; 157519076; 157552455; 157552455; 157552467	-
7908650	IGFN1	rs12122721	0.0329956	191	0.468197	0.0322293	0.0859533	0.908035	NA	-0.0390445	0.724625	0.998254	NA	1	201015352	G	A	0.7029	NM_001164586	uc001gwc.3	201190824	+
8139057	ELMO1	rs60600003	0.033289	192	0.468197	-0.0335548	0.559977	0.994169	NA	-0.0105959	0.530934	0.974744	NA	7	37342861	C	A	0.07738	ENST00000396040	uc003tfi.3	36985060	-
7912040	TNFRSF25	rs3007421	0.0333316	193	0.468197	-0.0326542	0.709043	0.995524	NA	-0.00699994	0.503482	0.974744	NA	1	6470129	A	G	0.1294	NM_001039664	uc057buq.1; uc057bur.1; uc001anh.4; uc057bus.1; uc057but.1; uc001ane.4; uc001anf.4; uc001ang.4; uc001ana.4; uc057buu.1; uc057buv.1; uc057buw.1; uc057bux.1; uc057buy.1; uc057buz.1; uc057bva.1; uc057bvb.1; uc057bvc.1; uc057bvd.1; uc057bve.1	6463622; 6466099; 6466175; 6466175; 6466175; 6466195; 6466175; 6466107; 6466107; 6466107; 6466107; 6466107; 6466107; 6463347; 6462607; 6465272; 6465630; 6466107; 6466099; 6465858	-
7991989	RHOT2	rs2744148	0.0335985	194	0.469513	0.0243533	0.0604689	0.908035	NA	-0.0293132	0.226584	0.962732	NA	16	1023552	G	A	0.1559	NM_138769	uc002cip.4	668085	+
8078442	CCR4	rs28723576	0.0342824	195	0.473622	-0.0446476	0.548056	0.988938	NA	0.0219433	0.939037	0.999408	NA	3	32936460	A	G	0.5414	NM_005508	uc003cfg.2	32951573	+
7980603	RNU6-835P	rs74796499	0.0343201	196	0.473622	-0.0648192	0.331696	0.968985	NA	0.0279936	0.64414	0.985816	NA	14	87965984	C	A	0.95882	ENST00000516974	uc021rxg.1	87996448	-
8171876	METTL1	rs703842	0.0344167	197	0.473622	-0.0511122	0.470908	0.968985	NA	-0.0299447	0.128283	0.944376	NA	12	57768956	A	G	0.6882	ENST00000553125	uc058qct.1	57772116	-
8008825	DHX40	rs180515	0.0346685	198	0.474215	0.0269601	0.928975	0.998203	NA	0.00216561	0.302907	0.962732	NA	17	59946914	G	A	0.35	NM_001166301	uc010woe.3	59565611	+
8111812	NA	rs4613763	0.0348096	199	0.474215	-0.0528403	0.768389	0.99578	NA	-0.00739006	0.616893	0.985816	NA	5	40392626	G	A	0.09412	NA	uc063dfk.1	40790204	-
7952129	RPS25	rs533646	0.0358859	200	0.484677	-0.0146086	0.903518	0.998203	NA	-0.0015212	0.80341	0.998254	NA	11	118696037	G	C	0.6607	NM_001028	uc001pun.4	119018690	-
7999435	PRM2	rs7191700	0.0359719	201	0.484677	-0.0282783	0.440835	0.968985	NA	-0.0193143	0.491641	0.974744	NA	16	11312946	C	T	0.6627	NM_001286356	uc002dau.2; uc032drg.2	11276480; 11276480	-
7967420	SBNO1	rs7132277	0.0361379	202	0.484677	-0.0247818	0.314539	0.968985	NA	0.0186028	0.1397	0.948749	NA	12	123108835	A	G	0.1941	NM_001167856	uc010tap.2	123350441	-
7953303	PLEKHG6	rs1800693	0.0362927	203	0.484677	-0.0214126	0.389307	0.968985	NA	-0.0156936	0.410675	0.974744	NA	12	6330843	G	A	0.45	NM_001144857	uc010sex.3	6312650	+
8006900	PNMT	rs12946510	0.0367081	204	0.487821	0.0197059	0.35899	0.968985	NA	-0.0168924	0.874371	0.999408	NA	17	39756124	A	G	0.4912	NM_002686	uc002hsi.3	39668157	+
7964522	CDK4	rs201202118	0.0369143	205	0.488169	-0.0189108	0.78262	0.996095	NA	0.00439821	0.484483	0.974744	NA	12	57788279	A	T	0.6964	NM_000075	uc001spv.4	57752521	-
8033969	RAVER1	rs8112449	0.0377494	206	0.495413	-0.0131996	0.025376	0.908035	NA	0.027079	0.148967	0.952715	NA	19	10409388	G	A	0.6353	NM_133452	uc060tgv.1	10333638	-
8081867	TIMMDC1	rs2293370	0.0378683	207	0.495413	-0.0245888	0.901899	0.998203	NA	0.00208077	0.846438	0.998254	NA	3	119501087	G	A	0.8521	NM_016589	uc003ecn.4	119498531	+
8129410	THEMIS	rs802734	0.0380103	208	0.495413	-0.0513265	0.365812	0.968985	NA	-0.0361915	0.759644	0.998254	NA	6	127957653	A	G	0.7147	NM_001010923	uc021zfa.1	127901081	-
8030403	PRR12	rs2303759	0.0384102	209	0.497779	-0.0139149	0.569529	0.99462	NA	0.00741702	0.20936	0.962732	NA	19	49365794	C	A	0.2692	NM_020719	uc002poo.5	49591642	+
8025633	PDE4A	rs2288904	0.0385961	210	0.497779	-0.0318346	0.773525	0.99578	NA	-0.00666176	0.473729	0.974744	NA	19	10631494	G	A	0.7882	NM_001111307	uc002moj.3	10420654	+
8081867	TIMMDC1	rs1131265	0.0387836	211	0.497779	-0.0252463	0.985403	0.999431	NA	0.000308272	0.920975	0.999408	NA	3	119503609	C	G	0.8491	NM_016589	uc003ecn.4	119498531	+
8015511	DHX58	rs2293152	0.0389263	212	0.497779	-0.0344733	0.720553	0.99578	NA	0.0100468	0.384725	0.974744	NA	17	42329511	C	G	0.6235	NM_024119	uc002hyw.5	42112733	-
7994647	PRRT2	rs7204270	0.0396428	213	0.502058	-0.024039	0.964189	0.998203	NA	0.00091575	0.310284	0.962732	NA	16	30145642	G	A	0.5265	NM_001256442	uc002dud.4	29812190	+
8082035	CD86	rs9282641	0.0399838	214	0.502058	-0.0309932	0.661504	0.99462	NA	0.00802224	0.936923	0.999408	NA	3	122077921	G	A	0.9	NM_001206924	uc011bjp.3	122055365	+
7956539	DTX3	rs201202118	0.0403045	215	0.502058	0.0238518	0.613642	0.99462	NA	0.0105167	0.990425	0.999548	NA	12	57788279	A	T	0.6964	NM_001286245	uc001sox.3	57604833	+
8030403	PRR12	rs8107548	0.0403545	216	0.502058	-0.0135989	0.589775	0.99462	NA	0.00701314	0.178893	0.962732	NA	19	49367386	G	A	0.2647	NM_020719	uc002poo.5	49591642	+
8066745	ZNF334	rs6074022	0.0403696	217	0.502058	-0.0319023	0.151152	0.935905	NA	-0.038685	0.529019	0.974744	NA	20	46111557	C	T	0.2735	XM_005260447	uc061xmv.1; uc002xsa.5; uc061xmu.1; uc002xsc.5; uc010ghl.5; uc002xsd.5	46506370; 46506638; 46509622; 46513554; 46513555; 46513559	-
8081826	UPK1B	rs1132200	0.0404429	218	0.502058	0.045997	0.776781	0.99578	NA	-0.0081521	0.118453	0.944376	NA	3	119431989	C	T	0.8706	NM_006952	uc003ecc.4	119173517	+
7964522	CDK4	rs703842	0.0405572	219	0.502058	-0.0183642	0.785094	0.996634	NA	0.00458036	0.497034	0.974744	NA	12	57768956	A	G	0.6882	NM_000075	uc001spv.4	57752521	-
7985213	CHRNA5	rs59772922	0.0425735	220	0.512781	0.143914	0.875536	0.998203	NA	0.012456	0.896266	0.999408	NA	15	78915124	A	G	0.8441	NM_000745	uc002bdy.3	78565519	+
8081867	TIMMDC1	rs1132200	0.0426779	221	0.512781	-0.0249653	0.922451	0.998203	NA	0.00163458	0.843353	0.998254	NA	3	119431989	C	T	0.8706	NM_016589	uc003ecn.4	119498531	+
7897661	RN7SL614P	rs10492972	0.0427479	222	0.512781	-0.0276358	0.861424	0.998203	NA	0.00384201	0.185369	0.962732	NA	1	10293054	C	T	0.3006	ENST00000461850	uc057cdf.1	10616835	+
7940409	CD5	rs34383631	0.0427748	223	0.512781	0.0343095	0.284692	0.951976	NA	-0.0309406	0.707816	0.998254	NA	11	61025858	A	G	0.4676	NM_014207	uc009ynk.4	61102394	+
8000869	SEPT1	rs7204270	0.043627	224	0.512781	-0.0368712	0.92755	0.998203	NA	0.00303356	0.271046	0.962732	NA	16	30145642	G	A	0.5265	NM_052838	uc002dxy.5	30382850	-
8015490	DNAJC7	rs9891119	0.0436654	225	0.512781	-0.0187296	0.302655	0.961895	NA	0.0163021	0.499851	0.974744	NA	17	42355962	C	A	0.3265	NM_001144766	uc010wgb.3	42017151	-
8015490	DNAJC7	rs4796791	0.0436654	226	0.512781	-0.0187296	0.302655	0.961895	NA	0.0163021	0.499851	0.974744	NA	17	42378745	A	G	0.3265	NM_001144766	uc010wgb.3	42017151	-
8081826	UPK1B	rs2293370	0.0437031	227	0.512781	0.0433629	0.675514	0.99462	NA	-0.0117824	0.120674	0.944376	NA	3	119501087	G	A	0.8521	NM_006952	uc003ecc.4	119173517	+
7940372	TMEM109	rs650258	0.0438309	228	0.512781	-0.016451	0.918529	0.998203	NA	0.00160077	0.72464	0.998254	NA	11	61064810	G	A	0.65	NM_024092	uc001nqg.4	60913873	+
7967337	ABCB9	rs949143	0.044132	229	0.512781	0.0224983	0.571139	0.99462	NA	0.0114868	0.106881	0.944376	NA	12	123110616	G	A	0.3176	NM_001243014	uc021rfo.2	122966460	-
8077171	RABL2B	rs470119	0.0441794	230	0.512781	0.0201344	0.952609	0.998203	NA	0.00103043	0.295707	0.962732	NA	22	50528485	A	G	0.3882	NM_001003789	uc062fos.1; uc003bnk.2; uc062fot.1; uc003bnm.2; uc003bnl.2; uc062fou.1; uc003bnn.2; uc062fov.1; uc062fow.1; uc062fox.1; uc062foy.1; uc062foz.1; uc062fpa.1; uc062fpb.1; uc062fpc.1	50783662; 50783621; 50782314; 50783642; 50783659; 50783662; 50783663; 50770502; 50783638; 50775833; 50783286; 50783630; 50783600; 50783630; 50783045	-
8007312	TUBG2	rs9891119	0.0442947	231	0.512781	0.0468531	0.512899	0.972686	NA	0.0242423	0.0595607	0.944376	NA	17	42355962	C	A	0.3265	NM_016437	uc010wgr.3	42659304	+
8007312	TUBG2	rs4796791	0.0442947	232	0.512781	0.0468531	0.512899	0.972686	NA	0.0242423	0.0595607	0.944376	NA	17	42378745	A	G	0.3265	NM_016437	uc010wgr.3	42659304	+
8026568	C19orf44	rs1870071	0.0443995	233	0.512781	-0.0220557	0.72087	0.99578	NA	-0.00730263	0.414941	0.974744	NA	19	16394295	G	A	0.2882	NM_001288834	uc002neg.5	16496393	+
8008096	SNX11	rs4239162	0.0445179	234	0.512781	0.0195834	0.733575	0.99578	NA	0.00616714	0.465935	0.974744	NA	17	47678444	G	A	0.5059	NM_013323	uc002ing.2	48107584	+
8008885	MIR21	rs8070345	0.0445985	235	0.512781	0.0687369	0.1227	0.930133	NA	0.116752	0.807688	0.998254	NA	17	59739396	A	G	0.5059	NR_029493	uc002ixv.3	59841265	+
8067802	RGS19	rs6062314	0.044639	236	0.512781	-0.0224322	0.383237	0.968985	NA	-0.0112599	0.232299	0.962732	NA	20	63778360	A	G	0.91471	NM_005873	uc002yhy.4	64079492	-
7929288	EXOC6	rs7923837	0.0453069	237	0.518257	-0.0234265	0.487835	0.968985	NA	0.0139929	0.750475	0.998254	NA	10	92722160	G	A	0.6471	NM_001013848	uc001kie.4	92834712	+
8138795	RNU6-979P	rs917116	0.0459191	238	0.522614	-0.0726821	0.455757	0.968985	NA	-0.0461593	0.722801	0.998254	NA	7	28133120	C	A	0.2529	ENST00000383896	uc022aav.1	28118219	-
8151447	IL7	rs1021156	0.0462492	239	0.522614	0.0440383	0.369654	0.968985	NA	-0.0333099	0.405091	0.974744	NA	8	78663569	A	G	0.2529	NM_000880	uc003ybg.3	78805523	-
7953341	TAPBPL	rs12296430	0.0462661	240	0.522614	0.0392037	0.198336	0.942254	NA	0.0378644	0.254009	0.962732	NA	12	6394334	C	G	0.2235	NM_018009	uc001qog.5	6452083	+
8042391	PLEK	rs7592330	0.0470269	241	0.525315	0.0205031	0.285085	0.951976	NA	-0.0195484	0.843291	0.998254	NA	2	68419651	A	G	0.5853	NM_002664	uc002sen.5	68365172	+
8042391	PLEK	rs7595037	0.0470269	242	0.525315	0.0205031	0.285085	0.951976	NA	-0.0195484	0.843291	0.998254	NA	2	68419963	A	G	0.5824	NM_002664	uc002sen.5	68365172	+
7917737	RN7SL692P	rs11810217	0.0470865	243	0.525315	0.0274864	0.152501	0.935905	NA	0.0295413	0.23094	0.962732	NA	1	92682820	A	G	0.2706	ENST00000464677	uc057iig.1	92975114	-
8081826	UPK1B	rs1131265	0.0478944	244	0.532138	0.0401288	0.645491	0.99462	NA	-0.0119778	0.096998	0.944376	NA	3	119503609	C	G	0.8491	NM_006952	uc003ecc.4	119173517	+
8007290	MLX	rs744166	0.0485727	245	0.537472	-0.0167217	0.481705	0.968985	NA	0.0111685	0.927675	0.999408	NA	17	42362183	G	A	0.3971	NM_170607	uc002iag.4	42567071	+
8104926	RNU6-1305P	rs6897932	0.0490833	246	0.537507	-0.0355323	0.0860731	0.908035	NA	0.0524419	0.609889	0.985816	NA	5	35874473	G	A	0.7059	ENST00000364353	uc063czn.1	36155118	+
8104926	RNU6-1305P	rs6881706	0.0490833	247	0.537507	-0.0355323	0.0860731	0.908035	NA	0.0524419	0.609889	0.985816	NA	5	35879054	C	A	0.7059	ENST00000364353	uc063czn.1	36155118	+
8066745	ZNF334	rs4810485	0.0493041	248	0.537507	-0.0306041	0.152113	0.935905	NA	-0.0381761	0.494444	0.974744	NA	20	46119308	A	C	0.2706	XM_005260447	uc061xmv.1; uc002xsa.5; uc061xmu.1; uc002xsc.5; uc010ghl.5; uc002xsd.5	46506370; 46506638; 46509622; 46513554; 46513555; 46513559	-
7985192	HYKK	rs59772922	0.0493689	249	0.537507	-0.0425319	0.0435087	0.908035	NA	0.0624759	0.97308	0.999408	NA	15	78915124	A	G	0.8441	NM_001083612	uc010ble.4	78507563	+
8130499	DYNLT1	rs1738074	0.0498986	250	0.5411	-0.0288081	0.945784	0.998203	NA	0.00196924	0.649335	0.985816	NA	6	159044945	G	A	0.6147	NM_001291602	uc063snu.1; uc003qrn.3; uc063snv.1	158642788; 158644739; 158644738	-
8119016	MAPK13	rs941816	0.0504845	251	0.545273	-0.0348382	0.173023	0.942254	NA	0.0365689	0.327399	0.962732	NA	6	36407527	G	A	0.1912	NM_002754	uc003ols.5	36130320	+
7944285	ARCN1	rs533646	0.0508118	252	0.54663	-0.0167507	0.915518	0.998203	NA	0.00154779	0.513579	0.974744	NA	11	118696037	G	C	0.6607	NM_001655	uc001ptq.4	118572452	+
7947991	NUP160	rs7120737	0.051806	253	0.555122	-0.0301528	0.195673	0.942254	NA	0.0269789	0.715864	0.998254	NA	11	47680843	G	A	0.1324	NM_015231	uc001ngm.4	47848467	-
8014871	PGAP3	rs12946510	0.0524213	254	0.55573	-0.0209154	0.451056	0.968985	NA	-0.0152839	0.510685	0.974744	NA	17	39756124	A	G	0.4912	ENST00000309862	uc060eso.1	39688057	-
7994769	CORO1A	rs7204270	0.0524422	255	0.55573	-0.0116308	0.736465	0.99578	NA	0.0041486	0.316202	0.962732	NA	16	30145642	G	A	0.5265	NM_001193333	uc059tbf.1; uc059tbg.1; uc002dww.4; uc059tbi.1; uc059tbk.1; uc059tbl.1; uc059tbm.1; uc010bzq.4; uc059tbn.1; uc059tbo.1; uc059tbp.1; uc059tbq.1; uc059tbs.1; uc059tbt.1; uc059tbu.1; uc002dwy.2; uc059tbv.1	30182826; 30182986; 30183421; 30183513; 30183604; 30183608; 30183608; 30183608; 30183616; 30183618; 30183620; 30183824; 30184217; 30184747; 30185931; 30186681; 30188074	+
8067727	ARFRP1	rs2256814	0.0524776	256	0.55573	0.0216104	0.176732	0.942254	NA	0.0253121	0.998573	0.999691	NA	20	63742630	A	G	0.2088	NM_001134758	uc061yol.1; uc061yog.1; uc061yoh.1; uc061yok.1; uc061yon.1; uc061yom.1; uc032ppa.2; uc061yoi.1; uc032ppb.2; uc032ppe.2; uc061yoj.1; uc032ppd.2; uc032ppj.2; uc032ppc.2	63700301; 63700777; 63701388; 63706053; 63706738; 63706874; 63707658; 63707838; 63707853; 63707916; 63707996; 63708013; 63708013; 63708025	-
8081925	NR1I2	rs1132200	0.053232	257	0.561525	0.0304358	0.968285	0.998203	NA	0.000784517	0.393814	0.974744	NA	3	119431989	C	T	0.8706	NM_003889	uc003edj.5	119780483	+
7925996	FBXO18	rs2104286	0.0543029	258	0.570601	-0.0198923	0.202157	0.942254	NA	-0.0211719	0.903192	0.999408	NA	10	6057082	A	G	0.7618	NM_001258452	uc057rkw.1; uc057rkx.1; uc057rky.1; uc057rkv.1; uc057rkz.1; uc057rla.1; uc057rlb.1; uc057rld.1; uc057rle.1; uc057rlf.1; uc057rlg.1; uc057rlc.1; uc057rli.1; uc001iis.5; uc001iit.5; uc057rku.1	5890279; 5903165; 5906505; 5890247; 5914177; 5917061; 5921345; 5923570; 5925263; 5925410; 5925410; 5921353; 5936632; 5890230; 5894385; 5890202	+
8083677	SCHIP1	rs4680534	0.0545922	259	0.571426	0.0271269	0.803656	0.998203	NA	0.00585165	0.0519195	0.944376	NA	3	159981157	C	T	0.3882	NM_001197107	uc003fcu.3; uc062pmk.1; uc062pml.1; uc062pmm.1; uc062pmn.1; uc062pmo.1; uc062pmp.1; uc062pmq.1	159839860; 159839937; 159839939; 159840059; 159840098; 159852938; 159852991; 159888791	+
7992219	BAIAP3	rs2744148	0.0549654	260	0.571427	0.0244834	0.864164	0.998203	NA	0.00300818	0.424808	0.974744	NA	16	1023552	G	A	0.1559	NM_001199098	uc021tag.2	1333644	+
7935027	IDE	rs7923837	0.0550138	261	0.571427	0.0178601	0.768506	0.99578	NA	0.00491001	0.961665	0.999408	NA	10	92722160	G	A	0.6471	NM_001165946	uc010qnp.2	92497761	-
8007212	STAT5A	rs744166	0.056766	262	0.58543	-0.0176987	0.139416	0.935905	NA	-0.0241809	0.784801	0.998254	NA	17	42362183	G	A	0.3971	NM_001288718	uc010cya.3	42287866	+
8025741	DNM2	rs2288904	0.0567939	263	0.58543	0.0137075	0.391298	0.968985	NA	-0.010266	0.878837	0.999408	NA	19	10631494	G	A	0.7882	NM_001005360	uc002mpt.3	10718162	+
8089970	ILDR1	rs9282641	0.057092	264	0.586275	0.0344254	0.930897	0.998203	NA	0.00178492	0.411603	0.974744	NA	3	122077921	G	A	0.9	NM_001199799	uc003ees.4	122022204	-
8025584	SNORD105	rs34536443	0.0576148	265	0.58941	-0.157288	0.914044	0.998203	NA	-0.00616901	0.276077	0.962732	NA	19	10352442	C	G	0.97041	NR_004381	uc010dwy.1	10107650	+
7934690	ZCCHC24	rs1250542	0.0578335	266	0.589424	0.0274155	0.398707	0.968985	NA	-0.0197953	0.265932	0.962732	NA	10	79274913	A	G	0.3946	NM_153367	uc001kak.4	79445627	-
8035146	CALR3	rs1870071	0.0580863	267	0.589783	-0.0340505	0.625424	0.99462	NA	-0.0141727	0.680053	0.99142	NA	19	16394295	G	A	0.2882	NM_145046	uc002ned.3	16496192	-
8000884	DCTPP1	rs7204270	0.0587521	268	0.594317	-0.0218803	0.510038	0.972686	NA	-0.0132483	0.0898352	0.944376	NA	16	30145642	G	A	0.5265	NM_024096	uc002dyf.4	30430075	-
7903393	S1PR1	rs11581062	0.0592747	269	0.594855	0.0398576	0.877891	0.998203	NA	-0.00485522	0.0273511	0.907602	NA	1	100941963	G	A	0.2853	NM_001400	uc001dud.3	101236887	+
7956539	DTX3	rs703842	0.0596334	270	0.594855	0.0215661	0.639701	0.99462	NA	0.00978125	0.954497	0.999408	NA	12	57768956	A	G	0.6882	NM_001286245	uc001sox.3	57604833	+
7952116	BCL9L	rs533646	0.0597865	271	0.594855	0.0260885	0.484847	0.968985	NA	-0.0165461	0.509126	0.974744	NA	11	118696037	G	C	0.6607	NM_182557	uc001pug.5	118910904	-
8007188	CNP	rs9891119	0.0603849	272	0.594855	-0.0204951	0.908305	0.998203	NA	0.00211327	0.754845	0.998254	NA	17	42355962	C	A	0.3265	NM_033133	uc002hyl.2	41966740	+
8007188	CNP	rs4796791	0.0603849	273	0.594855	-0.0204951	0.908305	0.998203	NA	0.00211327	0.754845	0.998254	NA	17	42378745	A	G	0.3265	NM_033133	uc002hyl.2	41966740	+
7934411	USP54	rs2688608	0.060648	274	0.594855	-0.0241698	0.0198805	0.908035	NA	-0.0526153	0.901794	0.999408	NA	10	73898591	A	C	0.6147	NM_152586	uc057ubt.1	73575675	-
8081853	POGLUT1	rs1132200	0.0608676	275	0.594855	0.0443849	0.343578	0.968985	NA	0.0282345	0.11333	0.944376	NA	3	119431989	C	T	0.8706	NM_152305	uc003ecm.4	119468937	+
7999419	DEXI	rs7191700	0.0609844	276	0.594855	-0.034073	0.0402434	0.908035	NA	0.0744126	0.123767	0.944376	NA	16	11312946	C	T	0.6627	NM_014015	uc002dal.4	10942460	-
8015681	CCR10	rs9891119	0.0617519	277	0.594855	0.0294913	0.301902	0.961895	NA	0.0260807	0.167451	0.961782	NA	17	42355962	C	A	0.3265	NM_016602	uc002iax.5	42681843	-
8015681	CCR10	rs4796791	0.0617519	278	0.594855	0.0294913	0.301902	0.961895	NA	0.0260807	0.167451	0.961782	NA	17	42378745	A	G	0.3265	NM_016602	uc002iax.5	42681843	-
7897339	CAMTA1	rs3007421	0.0617578	279	0.594855	0.0295713	0.2745	0.951976	NA	-0.0221586	0.531876	0.974744	NA	1	6470129	A	G	0.1294	NM_015215	uc001aoi.3	6785323	+
7975793	BATF	rs2300603	0.061808	280	0.594855	0.0253933	0.855292	0.998203	NA	-0.00384643	0.133432	0.948564	NA	14	75539214	A	G	0.7456	NM_006399	uc001xrr.4	75522424	+
7917283	MCOLN2	rs12087340	0.0629251	281	0.594855	0.126086	0.371278	0.968985	NA	0.0547792	0.0499682	0.944376	NA	1	85281310	A	G	0.07647	NM_153259	uc001dkm.4	84996940	-
8081853	POGLUT1	rs1131265	0.0629607	282	0.594855	0.0424971	0.377114	0.968985	NA	0.0262611	0.101403	0.944376	NA	3	119503609	C	G	0.8491	NM_152305	uc003ecm.4	119468937	+
8081853	POGLUT1	rs2293370	0.0632345	283	0.594855	0.0425261	0.338839	0.968985	NA	0.0287045	0.111877	0.944376	NA	3	119501087	G	A	0.8521	NM_152305	uc003ecm.4	119468937	+
7903355	GPR88	rs7552544	0.0632901	284	0.594855	0.0174706	0.724457	0.99578	NA	0.00648598	0.0864207	0.944376	NA	1	100775337	A	G	0.5828	NM_022049	uc001dth.4	100538136	+
8047097	GLS	rs9967792	0.0633206	285	0.594855	-0.0198985	0.729677	0.99578	NA	-0.00648473	0.966443	0.999408	NA	2	191109709	G	A	0.6618	NM_001256310	uc002use.4	190880833	+
7964548	METTL1	rs201202118	0.0638198	286	0.594855	0.0359468	0.478663	0.968985	NA	-0.0244404	0.902513	0.999408	NA	12	57788279	A	T	0.6964	NM_005371	uc010ssd.3	57772793	-
8089785	POPDC2	rs2293370	0.0639451	287	0.594855	-0.0446814	0.870784	0.998203	NA	-0.00546841	0.330198	0.962732	NA	3	119501087	G	A	0.8521	NM_022135	uc003ecx.2	119660590	-
8014863	RNU6-233P	rs12946510	0.0639579	288	0.594855	-0.0376377	0.47541	0.968985	NA	-0.0259562	0.573388	0.977379	NA	17	39756124	A	G	0.4912	ENST00000410845	uc060eqy.1	39546244	-
8008825	DHX40	rs8070345	0.0640173	289	0.594855	0.0221707	0.883032	0.998203	NA	0.00351348	0.672148	0.988175	NA	17	59739396	A	G	0.5059	NM_001166301	uc010woe.3	59565611	+
8171876	METTL1	rs201202118	0.0640182	290	0.594855	-0.0468105	0.472492	0.968985	NA	-0.0285143	0.109377	0.944376	NA	12	57788279	A	T	0.6964	ENST00000553125	uc058qct.1	57772116	-
8000779	TBX6	rs7204270	0.0640202	291	0.594855	0.0219151	0.653804	0.99462	NA	0.00918515	0.0724286	0.944376	NA	16	30145642	G	A	0.5265	ENST00000553607	uc002dwk.1	30091887	-
8034021	CDC37	rs34536443	0.0640715	292	0.594855	-0.035124	0.814855	0.998203	NA	-0.00291709	0.834678	0.998254	NA	19	10352442	C	G	0.97041	NM_007065	uc002mof.2	10403533	-
8116070	PDLIM7	rs4075958	0.0646306	293	0.594905	-0.0205326	0.100582	0.929176	NA	0.03389	0.356334	0.970201	NA	5	177357511	A	G	0.2515	NM_005451	uc003mhc.3	177497583	-
8017150	TUBD1	rs180515	0.0646747	294	0.594905	-0.0266883	0.00339396	0.657215	NA	0.0842602	0.132235	0.948564	NA	17	59946914	G	A	0.35	NM_001193609	uc002ixw.3; uc010ddf.3; uc010ddi.3; uc002ixx.3; uc010wok.3; uc060ieh.1; uc060iei.1; uc010wol.3; uc060iej.1; uc060iek.1; uc060iel.1; uc060iem.1; uc060ien.1; uc060ieo.1; uc060iep.1; uc060ieq.1	59892945; 59892945; 59892715; 59892920; 59892858; 59891003; 59891003; 59892893; 59892941; 59881148; 59892893; 59878762; 59892899; 59892935; 59892943; 59892935	-
8077116	ODF3B	rs470119	0.0647351	295	0.594905	-0.0294846	0.439108	0.968985	NA	0.0218523	0.507888	0.974744	NA	22	50528485	A	G	0.3882	XM_006724415	uc062fmy.1; uc003bmg.3; uc003bmh.2; uc062fmz.1; uc062fna.1; uc062fnb.1; uc062fnc.1; uc062fnd.1; uc062fne.1	50531822; 50532184; 50532579; 50532108; 50532147; 50532077; 50531423; 50531679; 50532580	-
8137208	ATP6V0E2	rs354033	0.0651499	296	0.596694	0.0208136	0.797029	0.997891	NA	-0.00484304	0.178625	0.962732	NA	7	149592373	G	A	0.7265	NM_001100592	uc064jbm.1	149872967	+
7960438	ANO2	rs1800693	0.0655926	297	0.598726	-0.0286011	0.369228	0.968985	NA	-0.0246106	0.183416	0.962732	NA	12	6330843	G	A	0.45	XM_006718991	uc058kbi.1; uc058kbj.1; uc058kbk.1; uc058kbl.1; uc058kbm.1; uc058kbn.1; uc058kbo.1; uc058kbp.1; uc058kbq.1; uc058kbr.1; uc058kbs.1; uc058kbt.1	5563337; 5945259; 5946232; 5946232; 5564638; 5615295; 5739968; 5733180; 5741123; 5741111; 5870436; 5881806	-
8025076	VAV1	rs1077667	0.0660937	298	0.601275	0.0185852	0.586156	0.99462	NA	-0.00823649	0.522589	0.974744	NA	19	6668961	G	A	0.7941	NM_001258206	uc010dva.3	6772713	+
7980309	C14orf1	rs2300603	0.0663686	299	0.601757	0.0332221	0.883989	0.998203	NA	-0.00381994	0.0761918	0.944376	NA	14	75539214	A	G	0.7456	NM_007176	uc001xrt.4	75661189	-
7999433	NA	rs7200786	0.0669498	300	0.603009	-0.0248996	0.419993	0.968985	NA	0.0196681	0.820154	0.998254	NA	16	11083944	A	G	0.4941	NA	uc059qus.1	11274236	-
8067125	BCAS1	rs2248359	0.0669515	301	0.603009	0.0250769	0.667504	0.99462	NA	-0.0101095	0.0432226	0.944376	NA	20	54174979	G	A	0.6059	NM_003657	uc002xws.3	54070594	-
8064108	C20orf195	rs6062314	0.0679792	302	0.608059	0.0343345	0.727282	0.99578	NA	-0.00709252	0.551637	0.974744	NA	20	63778360	A	G	0.91471	XM_005260231	uc061ynl.1; uc061ynm.1; uc002yfj.4; uc061ynn.1	63547890; 63553714; 63553019; 63554142	+
8104856	SPEF2	rs6897932	0.0681852	303	0.608059	-0.0250734	0.442743	0.968985	NA	0.0179409	0.424367	0.974744	NA	5	35874473	G	A	0.7059	NM_024867	uc003jjo.4	35617843	+
8104856	SPEF2	rs6881706	0.0681852	304	0.608059	-0.0250734	0.442743	0.968985	NA	0.0179409	0.424367	0.974744	NA	5	35879054	C	A	0.7059	NM_024867	uc003jjo.4	35617843	+
8089785	POPDC2	rs1131265	0.0685225	305	0.609064	-0.0443409	0.850694	0.998203	NA	-0.00620216	0.334996	0.962732	NA	3	119503609	C	G	0.8491	NM_022135	uc003ecx.2	119660590	-
7992255	GNPTG	rs2744148	0.0692165	306	0.613222	-0.0272162	0.45072	0.968985	NA	0.0155398	0.56362	0.977379	NA	16	1023552	G	A	0.1559	NM_032520	uc002clm.4	1351922	+
7953383	SCARNA10	rs1800693	0.0701861	307	0.618713	-0.0976761	0.359408	0.968985	NA	0.0883678	0.768857	0.998254	NA	12	6330843	G	A	0.45	NR_004387	uc009zeo.1	6510221	+
8112139	IL6ST	rs71624119	0.0709805	308	0.618713	-0.0317626	0.146604	0.935905	NA	0.0422675	0.00515569	0.846137	NA	5	56144903	G	A	0.7706	NM_001190981	uc063dsc.1	55976278	-
8137118	ZNF783	rs354033	0.0712339	309	0.618713	0.0203549	0.314731	0.968985	NA	-0.0187979	0.894319	0.999408	NA	7	149592373	G	A	0.7265	ENST00000378052	uc064jae.1	149262170	+
8121118	CASP8AP2	rs72928038	0.0712993	310	0.618713	-0.0301508	0.169262	0.942254	NA	0.0322615	0.0314013	0.907602	NA	6	90267049	A	G	0.1794	NM_001137667	uc063qch.1; uc063qci.1; uc063qcj.1; uc063qck.1; uc063qcl.1; uc063qcm.1	89829893; 89829899; 89829899; 89829930; 89829938; 89829940	+
8082012	SLC15A2	rs2255214	0.0716119	311	0.618713	-0.024186	0.19904	0.942254	NA	-0.0327846	0.345007	0.965277	NA	3	122051692	C	A	0.5147	NM_001145998	uc011bjn.2	121894439	+
8076894	MLC1	rs470119	0.0717141	312	0.618713	0.0360564	0.290245	0.951976	NA	-0.0332065	0.535708	0.974744	NA	22	50528485	A	G	0.3882	NM_015166	uc003bjh.2	50085902	-
8042391	PLEK	rs7595717	0.0717176	313	0.618713	0.0199285	0.206671	0.942254	NA	-0.0236184	0.568933	0.977379	NA	2	68360345	A	G	0.2647	NM_002664	uc002sen.5	68365172	+
7917707	EVI5	rs11810217	0.0719651	314	0.618713	0.0265944	0.0231265	0.908035	NA	-0.0493783	0.93108	0.999408	NA	1	92682820	A	G	0.2706	NM_005665	uc001dox.3	92792404	-
8023757	CD226	rs763361	0.0721596	315	0.618713	-0.0717704	0.460868	0.968985	NA	0.0547307	0.796922	0.998254	NA	18	69864406	T	C	0.4912	NM_006566	uc002lkm.6	69956996	-
8137091	ZNF398	rs354033	0.0722216	316	0.618713	-0.0198802	0.997681	0.999681	NA	-5.48563e-05	0.695817	0.997796	NA	7	149592373	G	A	0.7265	NM_020781	uc011kul.3	149126415	+
8148325	RNU1-106P	rs4410871	0.0723468	317	0.618713	-0.0334968	0.0508296	0.908035	NA	-0.0665763	0.176603	0.962732	NA	8	127802783	G	A	0.6794	ENST00000384382	uc064qej.1	127999130	+
7975324	GALNT16	rs2236262	0.0727703	318	0.620379	-0.0223385	0.284715	0.951976	NA	0.0216588	0.109257	0.944376	NA	14	68794755	A	G	0.5529	NM_001168368	uc059cuo.1; uc059cup.1; uc059cuq.1; uc059cus.1; uc059cut.1; uc001xla.3; uc010aqu.3; uc059cuu.1; uc059cur.1; uc001xlb.3	69259276; 69259641; 69259641; 69298540; 69332521; 69260290; 69260200; 69352028; 69260173; 69259963	+
7961075	CD69	rs10466829	0.0731221	319	0.621423	0.0729122	0.597028	0.99462	NA	-0.0342739	0.586969	0.981057	NA	12	9723495	A	G	0.5147	NM_001781	uc001qwk.3	9760901	-
8096663	CISD2	rs228614	0.0738475	320	0.624303	0.0241082	0.452124	0.968985	NA	0.0176437	0.438259	0.974744	NA	4	102657480	G	A	0.5324	NM_001008388	uc003hwt.5	102868977	+
8111533	LMBRD2	rs6897932	0.0743423	321	0.624303	-0.0232647	0.443944	0.968985	NA	0.0178688	0.357135	0.970201	NA	5	35874473	G	A	0.7059	NM_001007527	uc003jka.2	36151961	-
8111533	LMBRD2	rs6881706	0.0743423	322	0.624303	-0.0232647	0.443944	0.968985	NA	0.0178688	0.357135	0.970201	NA	5	35879054	C	A	0.7059	NM_001007527	uc003jka.2	36151961	-
8110265	FGFR4	rs4075958	0.0743821	323	0.624303	0.0179212	0.641636	0.99462	NA	0.00886074	0.396388	0.974744	NA	5	177357511	A	G	0.2515	NM_001291980	uc011dfu.3	177086904	+
8130505	EZR	rs212405	0.0749994	324	0.626645	-0.0216078	0.840081	0.998203	NA	0.00426031	0.313307	0.962732	NA	6	159049527	T	A	0.6824	NM_001111077	uc003qru.5	158819412	-
7996807	ZFP90	rs1886700	0.0751796	325	0.626645	0.0396395	0.0857072	0.908035	NA	-0.0483634	0.928679	0.999408	NA	16	68652002	A	G	0.1382	NM_133458	uc002ewe.3	68539757	+
8048887	RNU6-613P	rs10201872	0.0755224	326	0.626645	-0.0496816	0.626844	0.99462	NA	-0.0193052	0.721774	0.998254	NA	2	230242009	A	G	0.1824	ENST00000410412	uc061thn.1	229894345	+
8000716	SEZ6L2	rs7204270	0.0755858	327	0.626645	-0.0173409	0.49948	0.972686	NA	-0.0120625	0.75184	0.998254	NA	16	30145642	G	A	0.5265	NM_001114099	uc002dus.5; uc002dup.5; uc002duq.5; uc010ved.3; uc010vec.3; uc059swc.1; uc059swd.1; uc059swe.1; uc059swf.1	29899064; 29899090; 29899547; 29899264; 29899264; 29888593; 29886019; 29897928; 29899109	-
7940349	CCDC86	rs34383631	0.0760509	328	0.628579	-0.0203487	0.431609	0.968985	NA	0.016361	0.0144877	0.907602	NA	11	61025858	A	G	0.4676	NM_024098	uc001nqa.3	60842070	+
8006877	STARD3	rs12946510	0.0767693	329	0.629593	-0.0163961	0.64957	0.99462	NA	0.00759541	0.701488	0.998254	NA	17	39756124	A	G	0.4912	NM_001165937	uc010wei.3	39637140	+
7991401	HDDC3	rs8042861	0.0770196	330	0.629593	-0.0198465	0.548108	0.988938	NA	-0.0131098	0.205488	0.962732	NA	15	90434101	A	C	0.4588	NM_001286451	uc032cpi.2	90932569	-
8007188	CNP	rs744166	0.077087	331	0.629593	-0.0181327	0.834665	0.998203	NA	0.00380206	0.826598	0.998254	NA	17	42362183	G	A	0.3971	NM_033133	uc002hyl.2	41966740	+
8017150	TUBD1	rs8070345	0.0771025	332	0.629593	-0.0229381	0.00334349	0.657215	NA	0.0827597	0.66871	0.987612	NA	17	59739396	A	G	0.5059	NM_001193609	uc002ixw.3; uc010ddf.3; uc010ddi.3; uc002ixx.3; uc010wok.3; uc060ieh.1; uc060iei.1; uc010wol.3; uc060iej.1; uc060iek.1; uc060iel.1; uc060iem.1; uc060ien.1; uc060ieo.1; uc060iep.1; uc060ieq.1	59892945; 59892945; 59892715; 59892920; 59892858; 59891003; 59891003; 59892893; 59892941; 59881148; 59892893; 59878762; 59892899; 59892935; 59892943; 59892935	-
8067709	GMEB2	rs6062314	0.0776022	333	0.630415	-0.0264976	0.0208236	0.908035	NA	-0.0381027	0.433935	0.974744	NA	20	63778360	A	G	0.91471	NM_012384	uc002yfq.2	63627041	-
8014650	NPEPPS	rs4794058	0.0779387	334	0.630415	0.0164224	0.615656	0.99462	NA	0.00924268	0.517233	0.974744	NA	17	47519732	A	G	0.503	NM_006310	uc002ilr.5	47531063	+
7940391	CD6	rs650258	0.0782822	335	0.630415	0.0230329	0.605006	0.99462	NA	-0.012354	0.0578745	0.944376	NA	11	61064810	G	A	0.65	NM_001254750	uc001nqr.4	60971865	+
7964499	AGAP2	rs201202118	0.0783014	336	0.630415	-0.0177375	0.669081	0.99462	NA	-0.00793325	0.293177	0.962732	NA	12	57788279	A	T	0.6964	NM_001122772	uc001spq.4	57738246	-
7931873	GDI2	rs12722489	0.0783658	337	0.630415	0.018845	0.658846	0.99462	NA	0.0062741	0.23854	0.962732	NA	10	6060049	C	T	0.8647	NM_001115156	uc001iim.5	5813411	-
7964499	AGAP2	rs703842	0.0789353	338	0.631727	-0.0172778	0.678165	0.99462	NA	-0.00778204	0.306083	0.962732	NA	12	57768956	A	G	0.6882	NM_001122772	uc001spq.4	57738246	-
7981364	CINP	rs12148050	0.0795646	339	0.631727	0.019457	0.38323	0.968985	NA	-0.0163349	0.170922	0.962732	NA	14	102797451	A	G	0.3441	NM_032630	uc059fna.1	102362892	-
7999431	PRM3	rs4780346	0.0798427	340	0.631727	0.0281449	0.754912	0.99578	NA	-0.00762361	0.872113	0.999408	NA	16	11194949	A	G	0.2618	NM_021247	uc002dat.3	11273641	-
7897293	RNU6-731P	rs3007421	0.0800773	341	0.631727	0.034776	0.218203	0.942254	NA	0.0301796	0.909595	0.999408	NA	1	6470129	A	G	0.1294	ENST00000517213	uc057bvj.1	6540853	+
7953936	TMEM52B	rs11052877	0.0803801	342	0.631727	0.0241518	0.660176	0.99462	NA	0.0104786	0.737922	0.998254	NA	12	9753094	G	A	0.3882	NM_001079815	uc031yuk.2	10170541	+
7902700	NA	rs12087340	0.0805624	343	0.631727	0.0601397	0.147681	0.935905	NA	-0.0428693	1.38423e-05	0.0375264	NA	1	85281310	A	G	0.07647	NA	uc057iar.1	85592279	+
8035449	LSM4	rs874628	0.0808102	344	0.631727	-0.0126122	0.307883	0.968985	NA	-0.0146344	0.262039	0.962732	NA	19	18193890	A	G	0.7	NM_001252129	uc021uqn.2	18323071	-
7994813	ZNF48	rs7204270	0.0809592	345	0.631727	-0.0252095	0.481094	0.968985	NA	0.0178475	0.232494	0.962732	NA	16	30145642	G	A	0.5265	NM_001214906	uc021tgi.2	30378311	+
7912012	ACOT7	rs3007421	0.0813657	346	0.631727	0.02222	0.143704	0.935905	NA	0.0249145	0.342181	0.962732	NA	1	6470129	A	G	0.1294	NM_007274	uc001amt.4	6393766	-
7925976	RN7SL445P	rs3118470	0.0816281	347	0.631727	-0.0269401	0.745671	0.99578	NA	0.00927519	0.295879	0.962732	NA	10	6059750	G	A	0.3294	ENST00000495609	uc057rjt.1	5631462	+
8063115	MMP9	rs4810485	0.081787	348	0.631727	0.0414439	0.756513	0.99578	NA	0.0124891	0.690745	0.994886	NA	20	46119308	A	C	0.2706	NM_004994	uc002xqz.3	46008907	+
8089988	CCDC58	rs9282641	0.0818066	349	0.631727	0.0484008	0.663217	0.99462	NA	-0.0126663	0.0148221	0.907602	NA	3	122077921	G	A	0.9	NM_001017928	uc003eey.4	122383231	-
7928602	SFTPA1	rs1250550	0.0820711	350	0.631727	-0.0180101	0.0350163	0.908035	NA	-0.0383229	0.81129	0.998254	NA	10	79300560	A	C	0.3588	NM_001093770	uc057ull.1; uc057ulj.1; uc057ulk.1; uc001kap.4; uc001kar.4; uc009xry.4	79610960; 79610952; 79610954; 79610938; 79610938; 79610944	+
7928632	SFTPA1	rs1250550	0.0820711	351	0.631727	-0.0180101	0.0350163	0.908035	NA	-0.0383229	0.81129	0.998254	NA	10	79300560	A	C	0.3588	NM_001093770	uc057ull.1; uc057ulj.1; uc057ulk.1; uc001kap.4; uc001kar.4; uc009xry.4	79610960; 79610952; 79610954; 79610938; 79610938; 79610944	+
8007272	COASY	rs9891119	0.0825049	352	0.631727	0.020301	0.184326	0.942254	NA	-0.0244686	0.723246	0.998254	NA	17	42355962	C	A	0.3265	NM_001042532	uc010cyj.5	42562150	+
8007272	COASY	rs4796791	0.0825049	353	0.631727	0.020301	0.184326	0.942254	NA	-0.0244686	0.723246	0.998254	NA	17	42378745	A	G	0.3265	NM_001042532	uc010cyj.5	42562150	+
7921806	B4GALT3	rs35967351	0.0832614	354	0.631727	0.0151521	0.57309	0.99462	NA	0.00802664	0.650184	0.985816	NA	1	160742014	A	T	0.6706	NM_001199873	uc001fyq.3; uc057mpm.1; uc001fyr.3; uc001fys.3; uc057mpn.1; uc057mpo.1; uc057mpp.1; uc057mpq.1; uc057mpr.1; uc057mps.1; uc057mpt.1; uc057mpu.1; uc057mpv.1	161177485; 161177420; 161177968; 161177497; 161172410; 161177479; 161176156; 161177494; 161177468; 161177149; 161177491; 161177497; 161177479	-
8026991	PGPEP1	rs874628	0.0833724	355	0.631727	0.0172033	0.141306	0.935905	NA	0.0303205	0.163081	0.957749	NA	19	18193890	A	G	0.7	NM_017712	uc002nis.2	18340586	+
8015511	DHX58	rs9891119	0.0834879	356	0.631727	-0.0281655	0.910045	0.998203	NA	0.00317774	0.231862	0.962732	NA	17	42355962	C	A	0.3265	NM_024119	uc002hyw.5	42112733	-
8015511	DHX58	rs4796791	0.0834879	357	0.631727	-0.0281655	0.910045	0.998203	NA	0.00317774	0.231862	0.962732	NA	17	42378745	A	G	0.3265	NM_024119	uc002hyw.5	42112733	-
7911767	MMEL1	rs4648356	0.0836528	358	0.631727	0.0221342	0.851206	0.998203	NA	0.00376255	0.533575	0.974744	NA	1	2792599	C	A	0.6716	NM_033467	uc001ajy.3	2632990	-
8033818	OLFM2	rs34536443	0.0838751	359	0.631727	-0.0431775	0.297111	0.961895	NA	0.0177236	0.572764	0.977379	NA	19	10352442	C	G	0.97041	NM_058164	uc002mmp.4	9936552	-
7931873	GDI2	rs62626317	0.0840115	360	0.631727	0.0174419	0.659504	0.99462	NA	0.00630367	0.0451877	0.944376	NA	10	6068962	A	G	0.8324	NM_001115156	uc001iim.5	5813411	-
7975793	BATF	rs4903324	0.0842137	361	0.631727	0.0269957	0.700066	0.995524	NA	-0.00810874	0.625462	0.985816	NA	14	75495168	A	G	0.2088	NM_006399	uc001xrr.4	75522424	+
7953321	LTBR	rs12296430	0.0843546	362	0.631727	-0.0210674	0.468303	0.968985	NA	0.013473	0.0970508	0.944376	NA	12	6394334	C	G	0.2235	NM_001270987	uc010sfc.3	6375428	+
8003230	LINC00917	rs17445836	0.0846324	363	0.632062	-0.0595079	0.278131	0.951976	NA	-0.0597595	0.637932	0.985816	NA	16	85984057	G	A	0.7874	ENST00000600892	uc010chq.3	86337556	-
8143714	ZNF777	rs354033	0.085462	364	0.636504	0.0193963	0.668283	0.99462	NA	0.00880658	0.624528	0.985816	NA	7	149592373	G	A	0.7265	NM_015694	uc003wfv.4	149461123	-
8067818	NPBWR2	rs2256814	0.0857118	365	0.636615	-0.0292916	0.18718	0.942254	NA	0.0343225	0.181306	0.962732	NA	20	63742630	A	G	0.2088	NM_005286	uc011abt.3	64107171	-
8066745	ZNF334	rs2425752	0.0860086	366	0.637074	-0.0258351	0.165821	0.935905	NA	-0.0374392	0.5447	0.974744	NA	20	46073481	A	G	0.2853	XM_005260447	uc061xmv.1; uc002xsa.5; uc061xmu.1; uc002xsc.5; uc010ghl.5; uc002xsd.5	46506370; 46506638; 46509622; 46513554; 46513555; 46513559	-
7996761	PLA2G15	rs1886700	0.0867799	367	0.639443	0.0332778	0.11925	0.929176	NA	-0.0377393	0.186586	0.962732	NA	16	68652002	A	G	0.1382	NM_012320	uc002evr.4	68245343	+
7921652	SLAMF1	rs35967351	0.0868001	368	0.639443	0.0397134	0.513904	0.9729	NA	-0.0243414	0.325214	0.962732	NA	1	160742014	A	T	0.6706	NM_003037	uc001fwl.6	160647295	-
8017162	RNFT1	rs8070345	0.0876195	369	0.640883	-0.0214604	0.315961	0.968985	NA	0.0255126	0.798706	0.998254	NA	17	59739396	A	G	0.5059	NM_016125	uc002iya.4	59964719	-
8110265	FGFR4	rs4976646	0.0882418	370	0.640883	0.016791	0.643283	0.99462	NA	0.00843371	0.583208	0.978581	NA	5	177361569	G	A	0.3095	NM_001291980	uc011dfu.3	177086904	+
7940989	ESRRA	rs694739	0.088408	371	0.640883	-0.0186885	0.773058	0.99578	NA	-0.00581915	0.919515	0.999408	NA	11	64329761	A	G	0.6382	NM_001282450	uc001nzs.3	64306226	+
8017148	RNU6-450P	rs180515	0.0885707	372	0.640883	-0.0364296	0.240319	0.942254	NA	-0.0547441	0.55563	0.976014	NA	17	59946914	G	A	0.35	ENST00000364654	uc060ieg.1	59847544	-
7960512	RN7SL69P	rs1800693	0.0886827	373	0.640883	0.0288186	0.781227	0.99578	NA	-0.00795857	0.657802	0.985816	NA	12	6330843	G	A	0.45	ENST00000468423	uc021qtu.2	6095970	-
7980580	GALC	rs2119704	0.0886878	374	0.640883	0.0344665	0.502192	0.972686	NA	-0.0151928	0.150609	0.952715	NA	14	88021345	C	A	0.91471	NM_000153	uc001xvt.3	87993271	-
8089928	RNU4-62P	rs2255214	0.0886961	375	0.640883	-0.0241193	0.0859219	0.908035	NA	0.0492216	0.30415	0.962732	NA	3	122051692	C	A	0.5147	ENST00000410125	uc062myl.1	121655604	-
8066641	ZNF335	rs2425752	0.0888867	376	0.640883	0.0122232	0.87925	0.998203	NA	0.00216368	0.316955	0.962732	NA	20	46073481	A	G	0.2853	NM_022095	uc002xqw.4	45972172	-
7940884	NUDT22	rs694739	0.0893993	377	0.642869	-0.0133491	0.703402	0.995524	NA	0.00537478	0.63399	0.985816	NA	11	64329761	A	G	0.6382	NM_001128612	uc058cuo.1; uc058cup.1; uc058cuq.1; uc058cur.1; uc001nyq.6; uc001nyp.6; uc058cus.1; uc058cut.1; uc058cuu.1; uc058cuw.1; uc058cux.1; uc058cuy.1	64225940; 64226267; 64226274; 64226289; 64226289; 64226289; 64226299; 64226608; 64229130; 64229262; 64229301; 64229541	+
7999468	LITAF	rs7191700	0.090927	378	0.648394	-0.086785	0.513035	0.972686	NA	-0.054354	0.677087	0.991086	NA	16	11312946	C	T	0.6627	NM_001136472	uc002dbb.4	11586950	-
7959604	DDX55	rs7132277	0.0911675	379	0.648394	-0.0237014	0.981464	0.999431	NA	0.000495755	0.95548	0.999408	NA	12	123108835	A	G	0.1941	NM_020936	uc001ufi.4	123602098	+
8089785	POPDC2	rs1132200	0.0913213	380	0.648394	-0.0422888	0.825411	0.998203	NA	-0.0073712	0.364066	0.970201	NA	3	119431989	C	T	0.8706	NM_022135	uc003ecx.2	119660590	-
7985226	MORF4L1	rs59772922	0.0914815	381	0.648394	0.0198237	0.123291	0.930133	NA	0.0275922	0.53245	0.974744	NA	15	78915124	A	G	0.8441	NM_001265604	uc059mfo.1; uc059mfp.1; uc002bem.5; uc002bel.5; uc059mfq.1; uc059mfr.1; uc059mfs.1; uc059mft.1; uc059mfu.1; uc059mfv.1; uc059mfw.1; uc010une.4; uc059mfx.1; uc031qtb.2; uc059mfy.1; uc059mfz.1; uc059mga.1; uc059mgb.1; uc059mgc.1; uc059mgd.1; uc059mge.1; uc059mgf.1; uc059mgg.1	78810486; 78847666; 78872775; 78872813; 78872815; 78872886; 78872953; 78872972; 78872974; 78872983; 78872986; 78873004; 78873024; 78873029; 78873042; 78873722; 78873820; 78876491; 78877764; 78877777; 78878239; 78890641; 78891551	+
7953418	LAG3	rs1800693	0.091535	382	0.648394	-0.0187636	0.508644	0.972686	NA	-0.012461	0.0124813	0.907602	NA	12	6330843	G	A	0.45	NM_002286	uc001qqt.5	6772519	+
8131205	SDK1	rs1843938	0.0916027	383	0.648394	-0.0153483	0.701517	0.995524	NA	-0.00673355	0.766959	0.998254	NA	7	3073400	A	G	0.4324	NM_001079653	uc003smx.4; uc064bca.1; uc064bcb.1; uc064bcf.1; uc064bcg.1; uc064bch.1; uc003smy.4; uc064bci.1; uc064bcj.1; uc064bck.1	3301447; 3301586; 3301586; 3950919; 3950920; 3971465; 4129684; 4174221; 4227154; 4232886	+
8033996	TYK2	rs34536443	0.0921164	384	0.650332	-0.0348954	0.0396676	0.908035	NA	0.0295865	0.560787	0.977379	NA	19	10352442	C	G	0.97041	NM_003331	uc002moc.5	10380676	-
8102039	SLC9B1	rs228614	0.0923942	385	0.650435	-0.0258285	0.394593	0.968985	NA	-0.0242942	0.902555	0.999408	NA	4	102657480	G	A	0.5324	NM_001100874	uc003hwu.4	103019719	-
7917741	TMED5	rs11810217	0.0926108	386	0.650435	-0.0156475	0.641733	0.99462	NA	-0.00725709	0.789105	0.998254	NA	1	92682820	A	G	0.2706	NM_001167830	uc001dpo.4	93180361	-
8074817	TOP3B	rs2283792	0.0935077	387	0.654647	-0.016705	0.795738	0.997491	NA	-0.0050134	0.818001	0.998254	NA	22	21776836	C	A	0.5	NM_003935	uc002zvs.5	21982750	-
8081925	NR1I2	rs2293370	0.094294	388	0.654647	0.0246982	0.909078	0.998203	NA	0.00231247	0.319558	0.962732	NA	3	119501087	G	A	0.8521	NM_003889	uc003edj.5	119780483	+
8115997	RAB24	rs4075958	0.0943078	389	0.654647	0.0212906	0.692127	0.995524	NA	-0.00916633	0.753351	0.998254	NA	5	177357511	A	G	0.2515	NM_001031677	uc003mfw.5	177303708	-
7953395	COPS7A	rs1800693	0.0944113	390	0.654647	-0.0153786	0.0673156	0.908035	NA	-0.0294303	0.372316	0.970201	NA	12	6330843	G	A	0.45	NM_001164093	uc001qqn.5	6724286	+
8041642	RNU6-958P	rs6718520	0.094873	391	0.654647	-0.0799589	0.0195797	0.908035	NA	-0.165934	0.35348	0.970201	NA	2	43098432	A	G	0.4412	ENST00000516995	uc061iqx.1	43408306	+
7929315	CYP26C1	rs7923837	0.0948745	392	0.654647	-0.0149306	0.678327	0.99462	NA	0.00649494	0.51143	0.974744	NA	10	92722160	G	A	0.6471	NM_183374	uc010qns.2	93061263	+
8110253	ZNF346	rs4075958	0.0953188	393	0.654647	-0.0185531	0.0848334	0.908035	NA	0.0355968	0.558905	0.977303	NA	5	177357511	A	G	0.2515	NM_012279	uc003mfi.4	177022695	+
8114185	CDKN2AIPNL	rs756699	0.095413	394	0.654647	0.032892	0.899812	0.998203	NA	-0.00313988	0.723473	0.998254	NA	5	134110884	A	G	0.8757	NM_080656	uc011cxs.3	134411898	-
8002218	ESRP2	rs1886700	0.096033	395	0.654647	0.0275261	0.0769127	0.908035	NA	0.0394034	0.542187	0.974744	NA	16	68652002	A	G	0.1382	NM_024939	uc002evq.2	68236584	-
8026982	MPV17L2	rs11554159	0.0960398	396	0.654647	-0.0131091	0.882729	0.998203	NA	-0.00243919	0.637944	0.985816	NA	19	18175134	G	A	0.7235	NM_032683	uc002nid.4	18193181	+
7953333	CD27	rs1800693	0.096593	397	0.654647	0.0332774	0.0849856	0.908035	NA	-0.0590686	0.0911441	0.944376	NA	12	6330843	G	A	0.45	NM_001242	uc001qod.4	6444866	+
7947894	CELF1	rs7120737	0.0967853	398	0.654647	0.0191353	0.461988	0.968985	NA	0.010425	0.279054	0.962732	NA	11	47680843	G	A	0.1324	NM_001172640	uc010rhm.3	47489024	-
8064168	LIME1	rs2256814	0.0968242	399	0.654647	-0.0159108	0.919726	0.998203	NA	0.0016944	0.677784	0.991086	NA	20	63742630	A	G	0.2088	NM_017806	uc002ygp.5	63736642	+
8066641	ZNF335	rs4810485	0.0969633	400	0.654647	0.0126422	0.8766	0.998203	NA	0.00220609	0.138632	0.948749	NA	20	46119308	A	C	0.2706	NM_022095	uc002xqw.4	45972172	-
7998466	UNKL	rs2744148	0.0971359	401	0.654647	0.0189626	0.0274009	0.908035	NA	-0.0343519	0.123197	0.944376	NA	16	1023552	G	A	0.1559	NM_001037125	uc002clq.5	1414751	-
7917676	GLMN	rs11810217	0.0972604	402	0.654647	-0.0251386	0.254056	0.951976	NA	0.0267553	0.0652679	0.944376	NA	1	92682820	A	G	0.2706	NM_053274	uc001dor.4	92298976	-
7902660	WDR63	rs11587876	0.0973156	403	0.654647	0.0256522	0.0403954	0.908035	NA	0.0507328	0.896935	0.999408	NA	1	85449500	A	G	0.7618	NM_001288563	uc009wcl.5	85062311	+
7939835	FAM180B	rs7120737	0.0985038	404	0.656004	0.031624	0.143797	0.935905	NA	0.0365571	0.121352	0.944376	NA	11	47680843	G	A	0.1324	NM_001164379	uc058bgt.1	47586692	+
8007355	VPS25	rs2293152	0.0986008	405	0.656004	-0.0161271	0.8873	0.998203	NA	-0.00236968	0.575035	0.977379	NA	17	42329511	C	G	0.6235	NM_032353	uc002ibi.5	42773435	+
8007917	RN7SL270P	rs4794058	0.0988082	406	0.656004	-0.0280661	0.0620652	0.908035	NA	-0.052926	0.27516	0.962732	NA	17	47519732	A	G	0.503	ENST00000579643	uc060gme.1	47041824	+
8077036	DENND6B	rs470119	0.0992893	407	0.656004	0.0149391	0.0433081	0.908035	NA	0.0322665	0.0749709	0.944376	NA	22	50528485	A	G	0.3882	NM_001001794	uc011arv.2	50327060	-
7912292	LZIC	rs10492972	0.099674	408	0.656004	0.0169053	0.781076	0.99578	NA	-0.00515071	0.854783	0.999383	NA	1	10293054	C	T	0.3006	NM_032368	uc001aqm.4	9942768	-
7944216	ATP5L	rs523604	0.0997254	409	0.656004	-0.0138133	0.18738	0.942254	NA	-0.0196882	0.187915	0.962732	NA	11	118885029	A	G	0.5353	NM_006476	uc001psx.4	118401153	+
8110123	FAM153A	rs4976646	0.100049	410	0.656004	0.0212063	0.818022	0.998203	NA	0.00546335	0.30126	0.962732	NA	5	177361569	G	A	0.3095	XM_006714843	uc063khq.1; uc063khp.1; uc063khn.1; uc063khr.1; uc063khw.1; uc063kib.1; uc063khs.1; uc063kia.1; uc063kic.1; uc063khx.1; uc063kid.1; uc063khz.1; uc063khy.1; uc063kho.1; uc063kht.1; uc003mic.4; uc063khu.1; uc063kig.1; uc063kih.1; uc063khv.1; uc063kie.1; uc063kif.1; uc010jkp.2	177714152; 177716363; 177717252; 177723156; 177745214; 177750394; 177753206; 177753263; 177753263; 177753275; 177753275; 177753296; 177753297; 177780465; 177780633; 177780676; 177780845; 177781684; 177782813; 177782837; 177782965; 177783364; 177783398	-
8081925	NR1I2	rs1131265	0.100373	411	0.656004	0.0244794	0.970307	0.998203	NA	-0.000714942	0.242269	0.962732	NA	3	119503609	C	G	0.8491	NM_003889	uc003edj.5	119780483	+
8063071	ZSWIM3	rs2425752	0.100639	412	0.656004	-0.0235306	0.237414	0.942254	NA	-0.0320094	0.254256	0.962732	NA	20	46073481	A	G	0.2853	NM_080752	uc002xqd.4	45857616	+
7908637	GPR25	rs7522462	0.101151	413	0.656004	0.0207518	0.162914	0.935905	NA	-0.028514	0.138515	0.948749	NA	1	200912467	G	A	0.7176	NM_005298	uc001gvn.3	200873037	+
8066641	ZNF335	rs6074022	0.101319	414	0.656004	0.0124282	0.852638	0.998203	NA	0.00261098	0.128784	0.944376	NA	20	46111557	C	T	0.2735	NM_022095	uc002xqw.4	45972172	-
8025828	LDLR	rs2288904	0.101438	415	0.656004	0.0571278	0.488991	0.968985	NA	0.0377829	0.608322	0.985816	NA	19	10631494	G	A	0.7882	NM_000527	uc002mqk.5	11089361	+
8091733	RNU2-31P	rs1014486	0.101503	416	0.656004	-0.0347469	0.0662329	0.908035	NA	-0.0724659	0.858331	0.999383	NA	3	159973324	G	A	0.4559	ENST00000516954	uc062pmi.1	159808570	-
8089999	KPNA1	rs9282641	0.101642	417	0.656004	-0.0202709	0.468239	0.968985	NA	-0.010873	0.103709	0.944376	NA	3	122077921	G	A	0.9	NM_002264	uc003efe.3	122514928	-
7949124	PYGM	rs694739	0.102031	418	0.656004	0.0182688	0.81265	0.998203	NA	0.00483365	0.0216519	0.907602	NA	11	64329761	A	G	0.6382	NM_005609	uc001oax.5	64760297	-
8030416	SCAF1	rs8107548	0.102302	419	0.656004	-0.0120002	0.733383	0.99578	NA	0.00494363	0.915021	0.999408	NA	19	49367386	G	A	0.2647	NM_021228	uc002poq.4	49642124	+
8025697	ILF3	rs2288904	0.102405	420	0.656004	0.0142869	0.99768	0.999681	NA	3.68013e-05	0.937793	0.999408	NA	19	10631494	G	A	0.7882	NM_001137673	uc002mpm.3	10654327	+
8047262	C2orf69	rs281783	0.102406	421	0.656004	0.0213383	0.0394096	0.908035	NA	0.0382893	0.302322	0.962732	NA	2	199886859	A	G	0.8118	NM_153689	uc010zhb.2	199911255	+
8023547	RNU2-69P	rs7238078	0.102451	422	0.656004	-0.0383493	0.599805	0.99462	NA	-0.0182442	0.800151	0.998254	NA	18	58716960	A	C	0.7824	ENST00000516061	uc060pql.1	58926296	-
7917338	BCL10	rs11587876	0.10267	423	0.656004	0.0171414	0.650732	0.99462	NA	0.00821693	0.236525	0.962732	NA	1	85449500	A	G	0.7618	NM_003921	uc021opd.3	85277090	-
7923183	ZNF281	rs55838263	0.102762	424	0.656004	-0.0255668	0.139705	0.935905	NA	0.0370081	0.939121	0.999408	NA	1	200905600	A	G	0.7118	NM_001281293	uc001gve.5; uc001gvf.3; uc001gvg.3	200410056; 200410009; 200409992	-
7953409	PTMS	rs12296430	0.10285	425	0.656004	0.0247568	0.865492	0.998203	NA	-0.00394358	0.574963	0.977379	NA	12	6394334	C	G	0.2235	NM_002824	uc001qqq.3	6766374	+
7999419	DEXI	rs12927355	0.103083	426	0.656004	-0.0339732	0.0507385	0.908035	NA	0.0679425	0.19448	0.962732	NA	16	11100914	G	A	0.7059	NM_014015	uc002dal.4	10942460	-
8085730	RNU6-138P	rs11719975	0.103441	427	0.656744	-0.0199715	0.726445	0.99578	NA	-0.00744179	0.456725	0.974744	NA	3	18744093	C	G	0.2618	ENST00000515952	uc021wtu.1	18955049	-
8066964	TMEM189	rs17785991	0.105045	428	0.662541	-0.0141841	0.162957	0.935905	NA	0.0238021	0.994729	0.999691	NA	20	49822224	A	T	0.3265	NM_001162505	uc010gif.3	50153734	-
7997712	IRF8	rs13333054	0.10509	429	0.662541	-0.020823	0.430118	0.968985	NA	-0.0170992	0.99943	0.999691	NA	16	85977427	A	G	0.2235	NM_002163	uc002fjh.4	85898802	+
8008887	RPS6KB1	rs180515	0.105436	430	0.662541	-0.0162367	0.262866	0.951976	NA	0.0222585	0.957054	0.999408	NA	17	59946914	G	A	0.35	NM_001272042	uc010won.4	59893129	+
8014903	GSDMB	rs12946510	0.105868	431	0.662541	-0.0214716	0.310488	0.968985	NA	-0.0233826	0.113274	0.944376	NA	17	39756124	A	G	0.4912	NM_001165958	uc010cwj.4	39918650	-
8085946	EOMES	rs669607	0.106479	432	0.662541	0.0159302	0.00117158	0.415197	NA	-0.0634243	0.981289	0.999408	NA	3	28029953	C	A	0.5294	NM_001278182	uc003cdy.5	27722312	-
8085946	EOMES	rs1813375	0.106479	433	0.662541	0.0159302	0.00117158	0.415197	NA	-0.0634243	0.981289	0.999408	NA	3	28037080	A	C	0.5294	NM_001278182	uc003cdy.5	27722312	-
8085946	EOMES	rs170934	0.106479	434	0.662541	0.0159302	0.00117158	0.415197	NA	-0.0634243	0.981289	0.999408	NA	3	28037594	T	C	0.5294	NM_001278182	uc003cdy.5	27722312	-
8081880	ADPRH	rs1131265	0.106819	435	0.662541	0.0325925	0.0569792	0.908035	NA	-0.052068	0.747511	0.998254	NA	3	119503609	C	G	0.8491	NM_001125	uc003ecs.3	119579675	+
7934690	ZCCHC24	rs1782645	0.107187	436	0.662541	0.0227057	0.463862	0.968985	NA	-0.0183723	0.164983	0.957749	NA	10	79288854	A	G	0.4441	NM_153367	uc001kak.4	79445627	-
8026982	MPV17L2	rs874628	0.107816	437	0.662541	-0.0126005	0.8297	0.998203	NA	-0.00355978	0.337223	0.962732	NA	19	18193890	A	G	0.7	NM_032683	uc002nid.4	18193181	+
8034055	KRI1	rs34536443	0.107919	438	0.662541	-0.0490402	0.0456884	0.908035	NA	0.0417815	0.049835	0.944376	NA	19	10352442	C	G	0.97041	NM_023008	uc002moy.2	10566037	-
8108078	RN7SL541P	rs756699	0.107923	439	0.662541	0.0380198	0.134545	0.934639	NA	-0.0453826	0.506773	0.974744	NA	5	134110884	A	G	0.8757	ENST00000464317	uc021ydq.2	134517809	+
8116031	PFN3	rs4976646	0.10797	440	0.662541	-0.0175723	0.439119	0.968985	NA	-0.0156066	0.377784	0.97078	NA	5	177361569	G	A	0.3095	NM_001029886	uc003mgl.2	177400636	-
7918026	EXTL2	rs11581062	0.108309	441	0.662541	0.0432579	0.498931	0.972686	NA	-0.0261648	0.478576	0.974744	NA	1	100941963	G	A	0.2853	NM_001033025	uc031pnh.1; uc001dtk.3; uc001dtl.3; uc057iqy.1; uc057iqz.1; uc057ira.1; uc057irb.1	100895179; 100894812; 100895998; 100894664; 100894811; 100894681; 100894805	-
8035449	LSM4	rs11554159	0.108369	442	0.662541	-0.011607	0.339677	0.968985	NA	-0.0135138	0.195366	0.962732	NA	19	18175134	G	A	0.7235	NM_001252129	uc021uqn.2	18323071	-
7953442	GPR162	rs12296430	0.10849	443	0.662541	0.0279229	0.464274	0.968985	NA	-0.0202508	0.915681	0.999408	NA	12	6394334	C	G	0.2235	NM_019858	uc001qqw.2	6821544	+
8083677	SCHIP1	rs2243123	0.108693	444	0.662541	0.0219496	0.466602	0.968985	NA	0.0169535	0.260235	0.962732	NA	3	159991864	G	A	0.3	NM_001197107	uc003fcu.3; uc062pmk.1; uc062pml.1; uc062pmm.1; uc062pmn.1; uc062pmo.1; uc062pmp.1; uc062pmq.1	159839860; 159839937; 159839939; 159840059; 159840098; 159852938; 159852991; 159888791	+
8034055	KRI1	rs8112449	0.108753	445	0.662541	-0.0191371	0.0645263	0.908035	NA	0.0381525	0.245814	0.962732	NA	19	10409388	G	A	0.6353	NM_023008	uc002moy.2	10566037	-
8033987	ICAM3	rs2288904	0.110256	446	0.667196	-0.0287971	0.0312802	0.908035	NA	-0.052419	0.345377	0.965277	NA	19	10631494	G	A	0.7882	NM_002162	uc002mob.3	10339823	-
8111506	CAPSL	rs6897932	0.110693	447	0.667196	0.022663	0.75278	0.99578	NA	0.00747556	0.653304	0.985816	NA	5	35874473	G	A	0.7059	NM_001042625	uc003jjt.2	35938635	-
8111506	CAPSL	rs6881706	0.110693	448	0.667196	0.022663	0.75278	0.99578	NA	0.00747556	0.653304	0.985816	NA	5	35879054	C	A	0.7059	NM_001042625	uc003jjt.2	35938635	-
7925996	FBXO18	rs12722489	0.111223	449	0.667196	-0.0210202	0.15571	0.935905	NA	-0.0235975	0.379115	0.971438	NA	10	6060049	C	T	0.8647	NM_001258452	uc057rkw.1; uc057rkx.1; uc057rky.1; uc057rkv.1; uc057rkz.1; uc057rla.1; uc057rlb.1; uc057rld.1; uc057rle.1; uc057rlf.1; uc057rlg.1; uc057rlc.1; uc057rli.1; uc001iis.5; uc001iit.5; uc057rku.1	5890279; 5903165; 5906505; 5890247; 5914177; 5917061; 5921345; 5923570; 5925263; 5925410; 5925410; 5921353; 5936632; 5890230; 5894385; 5890202	+
8007397	PSME3	rs9891119	0.11123	450	0.667196	-0.0126684	0.864634	0.998203	NA	-0.0021104	0.122347	0.944376	NA	17	42355962	C	A	0.3265	NM_001267045	uc002ibs.5	42833417	+
8007397	PSME3	rs4796791	0.11123	451	0.667196	-0.0126684	0.864634	0.998203	NA	-0.0021104	0.122347	0.944376	NA	17	42378745	A	G	0.3265	NM_001267045	uc002ibs.5	42833417	+
8089926	RN7SL172P	rs1920296	0.11124	452	0.667196	0.0331429	0.563067	0.99462	NA	0.0196301	0.872275	0.999408	NA	3	121824730	C	A	0.6088	ENST00000460535	uc062myk.1	121654296	-
7981346	MOK	rs12148050	0.111762	453	0.668844	0.0297571	0.838257	0.998203	NA	0.00582436	0.207328	0.962732	NA	14	102797451	A	G	0.3441	NM_001272011	uc010txv.4	102305185	-
8110362	GRK6	rs4976646	0.113038	454	0.671129	-0.0118536	0.89539	0.998203	NA	0.00175678	0.371283	0.970201	NA	5	177361569	G	A	0.3095	NM_001004105	uc003mgq.3	177426842	+
8102050	SLC9B2	rs228614	0.113114	455	0.671129	0.0313134	0.400718	0.968985	NA	-0.0330053	0.990798	0.999548	NA	4	102657480	G	A	0.5324	NM_178833	uc003hwy.4	103076773	-
8063078	CTSA	rs6074022	0.113127	456	0.671129	0.0100824	0.235796	0.942254	NA	0.0143928	0.683838	0.993507	NA	20	46111557	C	T	0.2735	NM_000308	uc002xqh.4	45891043	+
7902965	BTBD8	rs41286801	0.114182	457	0.671129	0.0508954	0.611188	0.99462	NA	-0.0197402	0.133208	0.948564	NA	1	92509907	A	G	0.1941	NM_183242	uc001doo.5	92080335	+
8007263	HSD17B1	rs9891119	0.1143	458	0.671129	-0.0201766	0.4383	0.968985	NA	-0.0161202	0.595344	0.985063	NA	17	42355962	C	A	0.3265	NM_000413	uc002hzw.4	42549213	+
8007263	HSD17B1	rs4796791	0.1143	459	0.671129	-0.0201766	0.4383	0.968985	NA	-0.0161202	0.595344	0.985063	NA	17	42378745	A	G	0.3265	NM_000413	uc002hzw.4	42549213	+
7940391	CD6	rs34383631	0.114487	460	0.671129	0.0216684	0.762808	0.99578	NA	-0.00719632	0.726661	0.998254	NA	11	61025858	A	G	0.4676	NM_001254750	uc001nqr.4	60971865	+
8033179	SLC25A41	rs1077667	0.114584	461	0.671129	0.0234583	0.709889	0.995524	NA	0.00849671	0.711991	0.998254	NA	19	6668961	G	A	0.7941	NM_173637	uc010dus.4	6433762	-
7944463	NLRX1	rs533646	0.114675	462	0.671129	-0.0175588	0.220997	0.942254	NA	-0.023137	0.779889	0.998254	NA	11	118696037	G	C	0.6607	NM_001282144	uc001pvx.5	119168763	+
7999427	TNP2	rs4780346	0.115218	463	0.671129	-0.0216366	0.410752	0.968985	NA	0.0185555	0.889129	0.999408	NA	16	11194949	A	G	0.2618	NM_005425	uc002das.4	11269332	-
7944300	RNU6-1157P	rs523604	0.115413	464	0.671129	-0.0355585	0.415467	0.968985	NA	0.0336578	0.0465905	0.944376	NA	11	118885029	A	G	0.5353	ENST00000384456	uc058iab.1	118593987	+
8048889	FBXO36	rs9989735	0.11545	465	0.671129	0.0402413	0.15307	0.935905	NA	0.0431246	0.457802	0.974744	NA	2	230250739	C	G	0.1737	AK289655	uc061tho.1; uc061thp.1; uc002vqb.4; uc002vqa.4	229922490; 229922505; 229922301; 229922495	+
8086048	TMPPE	rs28723576	0.115454	466	0.671129	0.0189035	0.636903	0.99462	NA	-0.0095136	0.827406	0.998254	NA	3	32936460	A	G	0.5414	NM_001039770	uc003cfk.3	33096801	-
8059650	SP110	rs10201872	0.115609	467	0.671129	-0.0222465	0.944616	0.998203	NA	0.00142027	0.454099	0.974744	NA	2	230242009	A	G	0.1824	NM_001185015	uc061tik.1; uc061tii.1; uc061tij.1; uc061tih.1; uc061tip.1; uc061tiq.1; uc061tir.1; uc061tiu.1; uc002vqg.5; uc002vqh.5; uc061tiv.1; uc010fxk.4; uc061tiw.1; uc002vqi.5; uc061tix.1	230170915; 230171616; 230172312; 230173514; 230178257; 230211547; 230212905; 230219902; 230219950; 230219951; 230219961; 230219973; 230219989; 230220112; 230225729	-
8033151	ACER1	rs1077667	0.116057	468	0.671585	0.0233624	0.965668	0.998203	NA	0.000979433	0.958682	0.999408	NA	19	6668961	G	A	0.7941	NM_133492	uc002mel.3	6333629	-
8015572	HCRT	rs2293152	0.116315	469	0.671585	0.0190409	0.834763	0.998203	NA	0.00441273	0.453966	0.974744	NA	17	42329511	C	G	0.6235	NM_001524	uc002hzc.1	42185452	-
8035345	INSL3	rs874628	0.116502	470	0.671585	-0.0221785	0.487684	0.968985	NA	0.0174393	0.296652	0.962732	NA	19	18193890	A	G	0.7	NM_001265587	uc010ebf.3	17821574	-
8064277	MYT1	rs6062314	0.116722	471	0.671585	0.0279566	0.0426948	0.908035	NA	0.0391248	0.868082	0.999408	NA	20	63778360	A	G	0.91471	NM_004535	uc002yii.3	64164473	+
8042117	RNU6-612P	rs842639	0.116927	472	0.671585	0.0312868	0.220862	0.942254	NA	-0.0431059	0.133028	0.948564	NA	2	60868110	A	G	0.6294	ENST00000516909	uc061jld.1	60719639	+
7949033	MACROD1	rs694739	0.117839	473	0.675016	0.0151716	0.285034	0.951976	NA	-0.0185392	0.545881	0.974744	NA	11	64329761	A	G	0.6382	NM_014067	uc001nyh.4	64166061	-
7921275	FCRL3	rs3761959	0.118022	474	0.675016	-0.0296212	0.21829	0.942254	NA	-0.0443046	0.186412	0.962732	NA	1	157699488	G	A	0.5559	NM_052939	uc001frb.4	157700857	-
8081880	ADPRH	rs2293370	0.118276	475	0.675048	0.0319402	0.0679812	0.908035	NA	-0.0501568	0.615756	0.985816	NA	3	119501087	G	A	0.8521	NM_001125	uc003ecs.3	119579675	+
8035351	JAK3	rs874628	0.11903	476	0.677395	-0.0261867	0.030825	0.908035	NA	0.0713027	0.222777	0.962732	NA	19	18193890	A	G	0.7	NM_000215	uc002nhn.5	17848032	-
7949172	MAP4K2	rs694739	0.119187	477	0.677395	-0.0171046	0.999015	0.999753	NA	2.51148e-05	0.127847	0.944376	NA	11	64329761	A	G	0.6382	NM_004579	uc001obh.4	64803241	-
8148315	POU5F1B	rs4410871	0.119615	478	0.6784	0.0280679	0.176853	0.942254	NA	-0.0420759	0.62111	0.985816	NA	8	127802783	G	A	0.6794	NM_001159542	uc003ysf.4	127414289	+
7960642	ACRBP	rs1800693	0.120704	479	0.68301	-0.0147055	0.000659991	0.415197	NA	-0.0579778	0.468013	0.974744	NA	12	6330843	G	A	0.45	NM_032489	uc001qpu.2	6647460	-
7953341	TAPBPL	rs1800693	0.12102	480	0.68301	-0.0255445	0.233892	0.942254	NA	0.0348425	0.699789	0.998254	NA	12	6330843	G	A	0.45	NM_018009	uc001qog.5	6452083	+
8091757	TRIM59	rs4680534	0.121183	481	0.68301	-0.0282868	0.663704	0.99462	NA	-0.0129545	0.744332	0.998254	NA	3	159981157	C	T	0.3882	NM_173084	uc003fdm.4	160449829	-
7996772	SLC7A6	rs1886700	0.122842	482	0.689106	0.0342837	0.548548	0.988938	NA	-0.0171571	0.957307	0.999408	NA	16	68652002	A	G	0.1382	NM_001076785	uc002evt.3	68264559	+
7964555	AVIL	rs201202118	0.123302	483	0.689106	-0.0222891	0.126549	0.932519	NA	-0.0362295	0.0588632	0.944376	NA	12	57788279	A	T	0.6964	NM_006576	uc001sqj.4	57816471	-
7967420	SBNO1	rs1790100	0.123367	484	0.689106	-0.017355	0.389785	0.968985	NA	0.0158631	0.289097	0.962732	NA	12	123172178	G	T	0.2324	NM_001167856	uc010tap.2	123350441	-
7948502	RNU6-933P	rs34383631	0.12348	485	0.689106	0.0377222	0.574521	0.99462	NA	-0.0221043	0.161173	0.953651	NA	11	61025858	A	G	0.4676	ENST00000384424	uc058bxf.1	60985167	-
7956522	KIF5A	rs12368653	0.123536	486	0.689106	-0.0281165	0.899988	0.998203	NA	0.00388075	0.834344	0.998254	NA	12	57739473	A	G	0.4765	ENST00000455537	uc001sor.2	57549997	+
7921275	FCRL3	rs2050568	0.124353	487	0.692238	-0.0305503	0.237287	0.942254	NA	-0.043608	0.610741	0.985816	NA	1	157800451	G	A	0.5325	NM_052939	uc001frb.4	157700857	-
7904408	HSD3B2	rs666930	0.124942	488	0.693251	-0.0251667	0.25005	0.951976	NA	0.0348175	0.0668063	0.944376	NA	1	119716347	G	A	0.5588	NM_000198	uc001eht.4	119415083	+
8121132	GJA10	rs72928038	0.125369	489	0.693251	-0.0286942	0.0696885	0.908035	NA	-0.0443268	0.760386	0.998254	NA	6	90267049	A	G	0.1794	NM_032602	uc011eaa.3	89894468	+
7997680	GSE1	rs13333054	0.125503	490	0.693251	-0.0146457	0.438001	0.968985	NA	-0.0127654	0.505497	0.974744	NA	16	85977427	A	G	0.2235	NM_001134473	uc002fiw.4	85611408	+
8026991	PGPEP1	rs11554159	0.125709	491	0.693251	0.015909	0.166014	0.935905	NA	0.0287009	0.0890522	0.944376	NA	19	18175134	G	A	0.7235	NM_017712	uc002nis.2	18340586	+
7953442	GPR162	rs1800693	0.126079	492	0.693251	-0.0223077	0.396219	0.968985	NA	-0.0224453	0.334526	0.962732	NA	12	6330843	G	A	0.45	NM_019858	uc001qqw.2	6821544	+
8044669	RABL2B	rs470119	0.126223	493	0.693251	0.0166271	0.703823	0.995524	NA	0.0069895	0.612352	0.985816	NA	22	50528485	A	G	0.3882	NM_001003789	uc062fos.1; uc003bnk.2; uc062fot.1; uc003bnm.2; uc003bnl.2; uc062fou.1; uc003bnn.2; uc062fov.1; uc062fow.1; uc062fox.1; uc062foy.1; uc062foz.1; uc062fpa.1; uc062fpb.1; uc062fpc.1	50783662; 50783621; 50782314; 50783642; 50783659; 50783662; 50783663; 50770502; 50783638; 50775833; 50783286; 50783630; 50783600; 50783630; 50783045	-
7997702	COX4I1	rs13333054	0.126325	494	0.693251	-0.0131067	0.558721	0.993836	NA	0.00853501	0.122339	0.944376	NA	16	85977427	A	G	0.2235	ENST00000562929	uc059yat.1	85805068	+
8025601	ICAM1	rs8112449	0.126674	495	0.693765	-0.0239847	0.630523	0.99462	NA	0.0136385	0.981172	0.999408	NA	19	10409388	G	A	0.6353	NM_000201	uc002mnq.3	10270834	+
7940473	TMEM138	rs34383631	0.127366	496	0.69615	-0.0150229	0.73849	0.99578	NA	0.00593033	0.600133	0.985816	NA	11	61025858	A	G	0.4676	NM_016464	uc001nrl.3	61362000	+
8052418	PUS10	rs842639	0.127843	497	0.696459	0.0244432	0.332388	0.968985	NA	0.0280779	0.00530592	0.846137	NA	2	60868110	A	G	0.6294	NM_144709	uc002sao.4	61018254	-
8063115	MMP9	rs2425752	0.128275	498	0.696459	0.0338346	0.778213	0.99578	NA	0.0114254	0.772524	0.998254	NA	20	46073481	A	G	0.2853	NM_004994	uc002xqz.3	46008907	+
7964555	AVIL	rs703842	0.128482	499	0.696459	-0.0205947	0.128717	0.932519	NA	-0.0356857	0.065977	0.944376	NA	12	57768956	A	G	0.6882	NM_006576	uc001sqj.4	57816471	-
7911941	CHD5	rs3007421	0.129177	500	0.696459	-0.0189519	0.971911	0.998203	NA	-0.000592463	0.180394	0.962732	NA	1	6470129	A	G	0.1294	NM_015557	uc001amb.3	6180123	-
7964575	RNU6-1083P	rs12368653	0.129371	501	0.696459	-0.031433	0.430642	0.968985	NA	-0.0280226	0.435324	0.974744	NA	12	57739473	A	G	0.4765	ENST00000384022	uc058qdr.1	57806260	-
7928589	PPIF	rs1250542	0.129388	502	0.696459	0.0280003	0.59359	0.99462	NA	0.0160736	0.413499	0.974744	NA	10	79274913	A	G	0.3946	ENST00000472580	uc057ulc.1	79347468	+
8064156	ZGPAT	rs6062314	0.129718	503	0.696459	0.0146891	0.509969	0.972686	NA	-0.0077216	0.472871	0.974744	NA	20	63778360	A	G	0.91471	ENST00000431125	uc061yop.1	63708061	+
7952086	TREH	rs523604	0.129793	504	0.696459	0.0164543	0.84496	0.998203	NA	0.00368726	0.0557142	0.944376	NA	11	118885029	A	G	0.5353	NM_007180	uc031ygn.2	118679673	-
7992010	RHBDL1	rs2744148	0.12993	505	0.696459	-0.0227353	0.250735	0.951976	NA	0.0237609	0.990167	0.999548	NA	16	1023552	G	A	0.1559	NM_001278721	uc059ooh.1	675682	+
8138718	HOXA2	rs706015	0.130193	506	0.696459	-0.0287645	0.258454	0.951976	NA	0.0329026	0.713146	0.998254	NA	7	26975369	C	A	0.1824	NM_006735	uc003syh.4	27102811	-
8035351	JAK3	rs11554159	0.130748	507	0.696459	-0.024568	0.024037	0.908035	NA	0.0739508	0.2643	0.962732	NA	19	18175134	G	A	0.7235	NM_000215	uc002nhn.5	17848032	-
7999423	SOCS1	rs6498184	0.131302	508	0.696459	-0.0203475	0.70331	0.995524	NA	-0.0085639	0.236731	0.962732	NA	16	11342133	G	A	0.8235	NM_003745	uc002dar.2	11256179	-
8066697	SLC35C2	rs6074022	0.131377	509	0.696459	0.0135257	0.781596	0.99578	NA	0.00469164	0.278772	0.962732	NA	20	46111557	C	T	0.2735	NM_001281457	uc061xlv.1; uc061xlw.1; uc061xlx.1; uc061xma.1; uc061xmb.1; uc021wen.2; uc061xmc.1; uc061xlz.1; uc061xly.1; uc002xrq.5; uc002xrr.5; uc002xrp.5; uc010zxp.4	46353197; 46355195; 46357701; 46358506; 46358764; 46363174; 46364361; 46364381; 46364390; 46364395; 46364401; 46364404; 46364458	-
8129804	MAP3K5	rs17066096	0.131886	510	0.696459	0.0153079	0.0598744	0.908035	NA	-0.0319071	0.564002	0.977379	NA	6	137131771	G	A	0.2735	NM_005923	uc003qhc.4	136792518	-
8089988	CCDC58	rs2255214	0.132175	511	0.696459	0.022409	0.719322	0.99578	NA	-0.0102872	0.829589	0.998254	NA	3	122051692	C	A	0.5147	NM_001017928	uc003eey.4	122383231	-
7953871	NA	rs11052877	0.132541	512	0.696459	0.0335937	0.123858	0.930133	NA	-0.0593964	0.26369	0.962732	NA	12	9753094	G	A	0.3882	NA	uc021quu.1	9445057	+
8025728	QTRT1	rs2288904	0.132986	513	0.696459	-0.018192	0.101977	0.929176	NA	0.03039	0.333574	0.962732	NA	19	10631494	G	A	0.7882	NM_031209	uc002mpr.4	10701450	+
8115543	EBF1	rs11743296	0.133034	514	0.696459	0.0271135	0.689508	0.995524	NA	-0.00932504	0.797588	0.998254	NA	5	159497075	A	G	0.1559	NM_001290360	uc063jes.1; uc063jeo.1; uc063jev.1; uc063jep.1; uc063jeq.1; uc063jeu.1; uc063jey.1; uc003lxl.7; uc063jer.1; uc010jip.4; uc063jet.1	158708009; 158840123; 159019129; 159073794; 159096370; 159096606; 159097623; 159099693; 159099757; 159099761; 159099761	-
7908637	GPR25	rs12122721	0.134051	515	0.696459	0.0204166	0.191372	0.942254	NA	-0.0266585	0.26263	0.962732	NA	1	201015352	G	A	0.7029	NM_005298	uc001gvn.3	200873037	+
7999412	TVP23A	rs7191700	0.134263	516	0.696459	-0.0218495	0.481034	0.968985	NA	0.0199251	0.425153	0.974744	NA	16	11312946	C	T	0.6627	XM_006720945	uc002dad.4; uc059qta.1; uc010uyr.2; uc059qtb.1; uc059qtc.1; uc059qte.1; uc059qtf.1; uc010buo.2; uc059qtg.1; uc059qth.1; uc059qti.1	10818607; 10818600; 10818600; 10818600; 10818600; 10774996; 10818651; 10818785; 10773441; 10775031; 10818794	-
7961111	CLEC1A	rs10466829	0.134279	517	0.696459	0.0265342	0.579606	0.99462	NA	-0.0160636	0.711697	0.998254	NA	12	9723495	A	G	0.5147	NM_016511	uc001qxb.4	10098985	-
8030416	SCAF1	rs2303759	0.134681	518	0.696459	-0.0109503	0.778571	0.99578	NA	0.00406454	0.86188	0.999383	NA	19	49365794	C	A	0.2692	NM_021228	uc002poq.4	49642124	+
8112121	SLC38A9	rs71624119	0.135038	519	0.696459	0.0147747	0.556315	0.992869	NA	-0.00958983	0.40645	0.974744	NA	5	56144903	G	A	0.7706	NM_001258286	uc003jqd.4	55693053	-
7993195	CIITA	rs7200786	0.135233	520	0.696459	-0.0169599	0.630694	0.99462	NA	0.00995275	0.055587	0.944376	NA	16	11083944	A	G	0.4941	NM_000246	uc002dai.5	10877197	+
8137183	SSPO	rs354033	0.135503	521	0.696459	0.013861	0.0537566	0.908035	NA	0.0323095	0.488162	0.974744	NA	7	149592373	G	A	0.7265	NM_198455	uc064jau.1	149776041	+
8066598	ACOT8	rs6074022	0.135544	522	0.696459	0.0127076	0.309345	0.968985	NA	-0.015421	0.246086	0.962732	NA	20	46111557	C	T	0.2735	NM_005469	uc002xqa.3	45857406	-
7982185	DEXI	rs6498184	0.135725	523	0.696459	0.0325374	0.918948	0.998203	NA	-0.00357078	0.499123	0.974744	NA	16	11342133	G	A	0.8235	NM_014015	uc002dal.4	10942460	-
7986685	DEXI	rs6498184	0.135725	524	0.696459	0.0325374	0.918948	0.998203	NA	-0.00357078	0.499123	0.974744	NA	16	11342133	G	A	0.8235	NM_014015	uc002dal.4	10942460	-
7928401	CHCHD1	rs2688608	0.135896	525	0.696459	-0.0189858	0.405863	0.968985	NA	0.0193859	0.919407	0.999408	NA	10	73898591	A	C	0.6147	ENST00000372837	uc001jvb.3	73782046	+
7921713	TSTD1	rs35967351	0.135995	526	0.696459	-0.0254806	0.214413	0.942254	NA	-0.0348722	0.463152	0.974744	NA	1	160742014	A	T	0.6706	NM_001113205	uc001fxh.5	161038937	-
7917304	MCOLN3	rs12087340	0.136451	527	0.696459	0.0472381	0.823067	0.998203	NA	-0.00644387	0.831784	0.998254	NA	1	85281310	A	G	0.07647	NM_001253693	uc001dkq.4	85048446	-
7953418	LAG3	rs12296430	0.136914	528	0.696459	0.0185186	0.594019	0.99462	NA	-0.0106947	0.0330264	0.907602	NA	12	6394334	C	G	0.2235	NM_002286	uc001qqt.5	6772519	+
8082046	CASR	rs2255214	0.136966	529	0.696459	-0.0197448	0.158783	0.935905	NA	0.0360488	0.569869	0.977379	NA	3	122051692	C	A	0.5147	NM_000388	uc003eev.5	122183682	+
8067652	EEF1A2	rs2256814	0.137859	530	0.696459	0.0137976	0.832285	0.998203	NA	-0.00355121	0.456976	0.974744	NA	20	63742630	A	G	0.2088	NM_001958	uc002yfe.3	63499315	-
7908637	GPR25	rs55838263	0.137888	531	0.696459	0.0189534	0.178007	0.942254	NA	-0.0279469	0.183796	0.962732	NA	1	200905600	A	G	0.7118	NM_005298	uc001gvn.3	200873037	+
7999431	PRM3	rs7200786	0.137906	532	0.696459	0.0206299	0.592389	0.99462	NA	-0.0128473	0.400076	0.974744	NA	16	11083944	A	G	0.4941	NM_021247	uc002dat.3	11273641	-
7998367	RPUSD1	rs2744148	0.138024	533	0.696459	-0.0183457	0.0153259	0.908035	NA	0.0434887	0.624108	0.985816	NA	16	1023552	G	A	0.1559	NM_058192	uc002ckb.3	788383	-
8063078	CTSA	rs4810485	0.138216	534	0.696459	0.00952107	0.240516	0.942254	NA	0.014271	0.644478	0.985816	NA	20	46119308	A	C	0.2706	NM_000308	uc002xqh.4	45891043	+
7994637	MAZ	rs7204270	0.138528	535	0.696459	0.0127485	0.569567	0.99462	NA	0.00893865	0.415966	0.974744	NA	16	30145642	G	A	0.5265	NM_001042539	uc002dtx.5	29806595	+
8007323	CNTNAP1	rs9891119	0.138749	536	0.696459	-0.019518	0.669227	0.99462	NA	-0.00959756	0.789683	0.998254	NA	17	42355962	C	A	0.3265	NM_003632	uc002iay.4	42682612	+
8007323	CNTNAP1	rs4796791	0.138749	537	0.696459	-0.019518	0.669227	0.99462	NA	-0.00959756	0.789683	0.998254	NA	17	42378745	A	G	0.3265	NM_003632	uc002iay.4	42682612	+
7953901	CLEC12A	rs11052877	0.13918	538	0.696459	-0.0350746	0.0963868	0.929176	NA	0.0832094	0.229772	0.962732	NA	12	9753094	G	A	0.3882	NM_001207010	uc001qwq.3	9951315	+
8026579	TMEM38A	rs1870071	0.139273	539	0.696459	0.0285648	0.381974	0.968985	NA	0.0293663	0.576969	0.977602	NA	19	16394295	G	A	0.2882	NM_024074	uc002nes.4	16661126	+
7929258	KIF11	rs7923837	0.1394	540	0.696459	0.0297017	0.96377	0.998203	NA	-0.00161677	0.879979	0.999408	NA	10	92722160	G	A	0.6471	NM_004523	uc001kic.4	92593285	+
7959563	C12orf65	rs7132277	0.140121	541	0.696459	0.018173	0.117684	0.929176	NA	0.0290884	0.202044	0.962732	NA	12	123108835	A	G	0.1941	ENST00000425637	uc001ueo.4	123233436	+
8025766	CARM1	rs2288904	0.140382	542	0.696459	-0.0147033	0.434461	0.968985	NA	0.0111984	0.239172	0.962732	NA	19	10631494	G	A	0.7882	NM_199141	uc002mpz.4	10871512	+
7897559	RNU6-828P	rs10492972	0.140395	543	0.696459	-0.0300015	0.537826	0.97987	NA	-0.0210162	0.708642	0.998254	NA	1	10293054	C	T	0.3006	ENST00000364876	uc057ccb.1	10163267	+
7967331	VPS37B	rs7132277	0.14058	544	0.696459	0.0181518	0.57581	0.99462	NA	-0.0102017	0.879814	0.999408	NA	12	123108835	A	G	0.1941	NM_024667	uc001udl.4	122896444	-
8083709	SMC4	rs1014486	0.140672	545	0.696459	0.0147137	0.558044	0.993834	NA	-0.0103807	0.916788	0.999408	NA	3	159973324	G	A	0.4559	NM_001002800	uc003fdh.5	160399303	+
8064156	ZGPAT	rs2256814	0.140815	546	0.696459	-0.0100867	0.67336	0.99462	NA	-0.00509082	0.70369	0.998254	NA	20	63742630	A	G	0.2088	ENST00000431125	uc061yop.1	63708061	+
8000738	KCTD13	rs7204270	0.140874	547	0.696459	0.0173858	0.133358	0.934639	NA	0.0308537	0.939083	0.999408	NA	16	30145642	G	A	0.5265	NM_178863	uc002duv.5	29927035	-
8026954	PIK3R2	rs11554159	0.14117	548	0.696459	0.0137971	0.629373	0.99462	NA	-0.00892518	0.992542	0.999548	NA	19	18175134	G	A	0.7235	NM_005027	uc002nia.3	18153117	+
8021453	SEC11C	rs7238078	0.141391	549	0.696459	-0.0210371	0.403085	0.968985	NA	0.0189733	0.30613	0.962732	NA	18	58716960	A	C	0.7824	NM_033280	uc002lht.4	59139476	+
7918923	RNA5SP55	rs2300747	0.141672	550	0.696459	-0.0708384	0.928488	0.998203	NA	0.00566139	0.0959388	0.944376	NA	1	116561593	A	G	0.8676	ENST00000516701	uc021osl.1	116962471	-
7897076	MORN1	rs3748817	0.141903	551	0.696459	0.0232619	0.524875	0.975333	NA	0.015339	0.929234	0.999408	NA	1	2594226	A	G	0.6559	AK055432	uc001ajb.2; uc009vld.4; uc001ajd.2; uc057bls.1; uc057blu.1; uc057blv.1; uc057blw.1; uc010nyy.3; uc057blx.1; uc057bly.1; uc057blz.1	2391707; 2391687; 2391707; 2375878; 2387529; 2385121; 2388337; 2391671; 2388509; 2388316; 2389996	-
8015635	PTRF	rs2293152	0.141974	552	0.696459	0.0177939	0.636498	0.99462	NA	-0.00956776	0.359523	0.970201	NA	17	42329511	C	G	0.6235	NM_012232	uc002hzo.4	42423517	-
7964548	METTL1	rs703842	0.142256	553	0.696459	0.0287883	0.432894	0.968985	NA	-0.0266425	0.864082	0.999408	NA	12	57768956	A	G	0.6882	NM_005371	uc010ssd.3	57772793	-
7917737	RN7SL692P	rs41286801	0.1427	554	0.696459	0.0226799	0.183183	0.942254	NA	0.027732	0.576472	0.977602	NA	1	92509907	A	G	0.1941	ENST00000464677	uc057iig.1	92975114	-
7921821	ADAMTS4	rs35967351	0.142912	555	0.696459	-0.0189092	0.998575	0.999681	NA	-4.07236e-05	0.780477	0.998254	NA	1	160742014	A	T	0.6706	NM_005099	uc001fyt.5	161199056	-
7952069	IFT46	rs523604	0.143039	556	0.696459	-0.0161096	0.709664	0.995524	NA	0.00766772	0.387529	0.974744	NA	11	118885029	A	G	0.5353	NM_001168618	uc001ptp.2	118566076	-
8048887	RNU6-613P	rs9989735	0.143327	557	0.696459	-0.0450754	0.630369	0.99462	NA	-0.0196953	0.559937	0.977379	NA	2	230250739	C	G	0.1737	ENST00000410412	uc061thn.1	229894345	+
8007250	NAGLU	rs2293152	0.143523	558	0.696459	-0.015987	0.183647	0.942254	NA	-0.0243879	0.0184205	0.907602	NA	17	42329511	C	G	0.6235	NM_000263	uc002hzv.4	42536171	+
8026533	HSH2D	rs1870071	0.143722	559	0.696459	-0.0263744	0.208688	0.942254	NA	-0.037706	0.98874	0.999408	NA	19	16394295	G	A	0.2882	NM_001291274	uc032hot.2; uc060uxk.1; uc060uxl.1; uc060uxm.1; uc060uxn.1; uc060uxo.1; uc060uxp.1; uc060uxq.1	16134027; 16143684; 16143684; 16143690; 16143694; 16143714; 16143735; 16152551	+
7949067	BAD	rs694739	0.143865	560	0.696459	0.0141716	0.235354	0.942254	NA	-0.0218441	0.527497	0.974744	NA	11	64329761	A	G	0.6382	NM_004322	uc001nzc.4	64284639	-
7960637	LPAR5	rs12296430	0.144661	561	0.698641	-0.0178338	0.943239	0.998203	NA	-0.00131299	0.79929	0.998254	NA	12	6394334	C	G	0.2235	NM_001142961	uc009zer.2	6631649	-
7964413	R3HDM2	rs12368653	0.144831	562	0.698641	0.0119676	0.779568	0.99578	NA	0.00406533	0.355432	0.970201	NA	12	57739473	A	G	0.4765	NM_014925	uc009zpm.1	57310463	-
8017143	PTRH2	rs8070345	0.145295	563	0.699634	0.0206889	0.213932	0.942254	NA	0.0354541	0.521373	0.974744	NA	17	59739396	A	G	0.5059	ENST00000409433	uc060idm.1	59707626	-
7991939	WDR90	rs2744148	0.145918	564	0.700802	-0.0122006	0.388728	0.968985	NA	0.0108984	0.26193	0.962732	NA	16	1023552	G	A	0.1559	NM_145294	uc002cii.2	649416	+
7991399	RN7SL363P	rs8042861	0.146054	565	0.700802	0.0234053	0.65302	0.99462	NA	0.0132643	0.263873	0.962732	NA	15	90434101	A	C	0.4588	ENST00000482412	uc059ngm.1	90856207	-
7961120	CLEC7A	rs10466829	0.146651	566	0.701487	-0.0217379	0.483498	0.968985	NA	0.0177193	0.611653	0.985816	NA	12	9723495	A	G	0.5147	NM_022570	uc001qxf.4	10130241	-
7931899	IL15RA	rs2104286	0.146715	567	0.701487	0.021095	0.683175	0.994659	NA	-0.00929865	0.824424	0.998254	NA	10	6057082	A	G	0.7618	NM_001243539	uc001iiw.4	5978187	-
8059596	TRIP12	rs10201872	0.146988	568	0.701556	-0.0134233	0.912923	0.998203	NA	-0.00137748	0.728639	0.998254	NA	2	230242009	A	G	0.1824	NM_001284214	uc002vpx.3	229921999	-
7985983	NGRN	rs8042861	0.147935	569	0.703162	-0.0166085	0.415555	0.968985	NA	0.0185242	0.588407	0.981436	NA	15	90434101	A	C	0.4588	NR_028052	uc002bpg.2; uc002bpf.2; uc059nek.1	90265658; 90265704; 90266342	+
7906602	VANGL2	rs35967351	0.148008	570	0.703162	0.0184161	0.191442	0.942254	NA	-0.0261107	0.9696	0.999408	NA	1	160742014	A	T	0.6706	NM_020335	uc001fwc.3	160400585	+
8014650	NPEPPS	rs4239162	0.148102	571	0.703162	0.0135373	0.56151	0.99462	NA	0.0103267	0.454926	0.974744	NA	17	47678444	G	A	0.5059	NM_006310	uc002ilr.5	47531063	+
7956522	KIF5A	rs201202118	0.14965	572	0.708123	-0.0255849	0.872538	0.998203	NA	-0.00476971	0.0189369	0.907602	NA	12	57788279	A	T	0.6964	ENST00000455537	uc001sor.2	57549997	+
8114733	ARAP3	rs35952555	0.14967	573	0.708123	0.0209667	0.450585	0.968985	NA	-0.0169861	0.968947	0.999408	NA	5	142126991	C	A	0.6029	NM_022481	uc003llm.4	141682221	-
8042144	REL	rs842639	0.150272	574	0.708699	0.0124821	0.717971	0.99578	NA	-0.00564742	0.926063	0.999408	NA	2	60868110	A	G	0.6294	NM_001291746	uc002san.2	60881655	+
7917283	MCOLN2	rs11587876	0.150314	575	0.708699	0.0512592	0.161643	0.935905	NA	0.0837284	0.197305	0.962732	NA	1	85449500	A	G	0.7618	NM_153259	uc001dkm.4	84996940	-
7967386	MPHOSPH9	rs949143	0.151172	576	0.710984	0.0159928	0.962315	0.998203	NA	-0.000952332	0.616193	0.985816	NA	12	123110616	G	A	0.3176	NM_022782	uc001uel.5	123233123	-
7975799	FLVCR2	rs2300603	0.151407	577	0.710984	0.0258928	0.0435425	0.908035	NA	0.0590012	0.0232544	0.907602	NA	14	75539214	A	G	0.7456	NM_001195283	uc010tvd.2	75605461	+
7961059	KLRB1	rs11052877	0.151721	578	0.710984	0.0491206	0.0755766	0.908035	NA	-0.10067	0.545651	0.974744	NA	12	9753094	G	A	0.3882	NM_002258	uc010sgt.3	9607886	-
7940349	CCDC86	rs650258	0.15208	579	0.710984	-0.0154592	0.324528	0.968985	NA	0.0204211	0.902385	0.999408	NA	11	61064810	G	A	0.65	NM_024098	uc001nqa.3	60842070	+
8064242	LINC00176	rs6062314	0.152388	580	0.710984	0.0254745	0.654712	0.99462	NA	0.00916958	0.449154	0.974744	NA	20	63778360	A	G	0.91471	NR_027686	uc002yhq.4; uc011abq.3; uc061yqq.1; uc010gko.4	64034343; 64035662; 64038139; 64038131	+
7940840	OTUB1	rs694739	0.152602	581	0.710984	0.00822617	0.140982	0.935905	NA	-0.017093	0.793447	0.998254	NA	11	64329761	A	G	0.6382	NM_017670	uc001nyf.2	63986412	+
8085912	RNU6-342P	rs2371108	0.152635	582	0.710984	-0.0297998	0.718182	0.99578	NA	0.012765	0.609745	0.985816	NA	3	27715527	A	C	0.4118	ENST00000384521	uc062hqi.1	27265683	-
7972487	DOCK9	rs4772201	0.153081	583	0.711274	-0.0328626	0.284628	0.951976	NA	-0.0304217	0.879246	0.999408	NA	13	99434005	A	G	0.8118	NM_001130048	uc058xyi.1; uc058xyj.1; uc058xyk.1; uc058xyl.1; uc010tir.2; uc058xym.1; uc058xyn.1; uc058xyo.1; uc058xyp.1; uc058xyq.1; uc058xyr.1; uc058xys.1; uc058xyt.1; uc010tis.2; uc010tit.2; uc058xyu.1; uc058xyv.1	98831793; 98977990; 98978084; 99086406; 99086406; 98978061; 98829455; 98829366; 98847684; 98829496; 98855984; 98850080; 98860476; 98978084; 99086625; 98888685; 99086393	-
7998297	FBXL16	rs2744148	0.153369	584	0.711274	0.019444	0.752476	0.99578	NA	-0.00592104	0.63478	0.985816	NA	16	1023552	G	A	0.1559	NM_153350	uc021taa.2	705829	-
8083707	C3orf80	rs1014486	0.153484	585	0.711274	-0.0188753	0.646961	0.99462	NA	0.0107196	0.490129	0.974744	NA	3	159973324	G	A	0.4559	NM_001168214	uc021xgp.2	160225635	+
7986765	RPL5	rs11810217	0.154198	586	0.712798	-0.0105652	0.757552	0.99578	NA	0.00381679	0.286704	0.962732	NA	1	92682820	A	G	0.2706	NM_000969	uc001doz.4	92832024	+
7903355	GPR88	rs12027668	0.15457	587	0.712798	0.0138782	0.852791	0.998203	NA	0.00340843	0.522023	0.974744	NA	1	100865428	G	A	0.429	NM_022049	uc001dth.4	100538136	+
8033319	SH2D3A	rs1077667	0.154602	588	0.712798	0.0184541	0.395944	0.968985	NA	-0.0171626	0.360961	0.970201	NA	19	6668961	G	A	0.7941	NM_005490	uc002mft.4	6767588	-
8007290	MLX	rs2293152	0.155221	589	0.71444	-0.0132397	0.374838	0.968985	NA	0.0138583	0.338938	0.962732	NA	17	42329511	C	G	0.6235	NM_170607	uc002iag.4	42567071	+
8000856	TBC1D10B	rs7204270	0.155611	590	0.714838	-0.0166534	0.312295	0.968985	NA	-0.0203886	0.0359812	0.93286	NA	16	30145642	G	A	0.5265	NM_015527	uc002dxu.3	30370264	-
8017186	HEATR6	rs180515	0.155835	591	0.714838	-0.0177161	0.26846	0.951976	NA	0.0277257	0.651841	0.985816	NA	17	59946914	G	A	0.35	NM_022070	uc002iyk.2	60078931	-
8066697	SLC35C2	rs2425752	0.157279	592	0.715866	0.0119546	0.80284	0.998203	NA	0.00416767	0.295977	0.962732	NA	20	46073481	A	G	0.2853	NM_001281457	uc061xlv.1; uc061xlw.1; uc061xlx.1; uc061xma.1; uc061xmb.1; uc021wen.2; uc061xmc.1; uc061xlz.1; uc061xly.1; uc002xrq.5; uc002xrr.5; uc002xrp.5; uc010zxp.4	46353197; 46355195; 46357701; 46358506; 46358764; 46363174; 46364361; 46364381; 46364390; 46364395; 46364401; 46364404; 46364458	-
7986765	RPL5	rs41286801	0.157761	593	0.715866	-0.0119677	0.689526	0.995524	NA	0.00499413	0.320278	0.962732	NA	1	92509907	A	G	0.1941	NM_000969	uc001doz.4	92832024	+
8082058	CSTA	rs2255214	0.157914	594	0.715866	-0.0189691	0.275066	0.951976	NA	-0.027178	0.38398	0.974253	NA	3	122051692	C	A	0.5147	NM_005213	uc003eex.4	122325243	+
7897561	KIF1B	rs10492972	0.158037	595	0.715866	0.0216942	0.929353	0.998203	NA	0.00221727	0.626391	0.985816	NA	1	10293054	C	T	0.3006	NM_015074	uc001aqw.5	10210804	+
8034108	YIPF2	rs2288904	0.158245	596	0.715866	-0.0140758	0.386307	0.968985	NA	-0.0122679	0.986813	0.999408	NA	19	10631494	G	A	0.7882	NM_024029	uc002mqb.4	10928653	-
7960553	MRPL51	rs1800693	0.158248	597	0.715866	0.0176357	0.0793374	0.908035	NA	0.0403758	0.530056	0.974744	NA	12	6330843	G	A	0.45	NM_016497	uc001qom.3	6493598	-
7949080	NRXN2	rs694739	0.158559	598	0.715866	-0.0148285	0.256804	0.951976	NA	0.0213931	0.520759	0.974744	NA	11	64329761	A	G	0.6382	NM_015080	uc021qkw.2	64723188	-
8035435	KIAA1683	rs874628	0.158634	599	0.715866	-0.016054	0.27263	0.951976	NA	-0.0244604	0.882112	0.999408	NA	19	18193890	A	G	0.7	NM_001145304	uc010ebn.3	18274509	-
8000799	GDPD3	rs7204270	0.158651	600	0.715866	-0.0259053	0.140899	0.935905	NA	-0.0443901	0.583684	0.978581	NA	16	30145642	G	A	0.5265	NM_024307	uc002dwp.4	30113856	-
8035156	CHERP	rs1870071	0.158889	601	0.715866	0.0129834	0.301846	0.961895	NA	0.0174436	0.331801	0.962732	NA	19	16394295	G	A	0.2882	NM_006387	uc002nei.2	16542530	-
7941039	RPS6KA4	rs694739	0.158964	602	0.715866	0.0157181	0.920093	0.998203	NA	-0.00202813	0.0762577	0.944376	NA	11	64329761	A	G	0.6382	NM_001006944	uc001oaf.4; uc001oae.4; uc058cxl.1; uc058cxm.1; uc058cxn.1; uc058cxo.1; uc058cxp.1; uc058cxq.1	64359147; 64359170; 64359180; 64359181; 64359181; 64359283; 64360516; 64360989	+
7997680	GSE1	rs17445836	0.159671	603	0.716816	0.0140908	0.330425	0.968985	NA	-0.0161652	0.32843	0.962732	NA	16	85984057	G	A	0.7874	NM_001134473	uc002fiw.4	85611408	+
7953914	CLEC12B	rs11052877	0.160109	604	0.716816	-0.0434642	0.971384	0.998203	NA	0.0019844	0.864976	0.999408	NA	12	9753094	G	A	0.3882	NM_001129998	uc001qwz.3	10010631	+
7918923	RNA5SP55	rs1335532	0.160222	605	0.716816	-0.0669856	0.964166	0.998203	NA	0.00284074	0.0913717	0.944376	NA	1	116558335	A	G	0.8647	ENST00000516701	uc021osl.1	116962471	-
8025129	MBD3L5	rs1077667	0.160407	606	0.716816	-0.0202141	0.924125	0.998203	NA	-0.0020571	0.788182	0.998254	NA	19	6668961	G	A	0.7941	NM_001136507	uc010xjl.3	7030577	+
7902687	CYR61	rs12087340	0.160897	607	0.716816	-0.0360475	0.78915	0.996634	NA	-0.00647234	0.735138	0.998254	NA	1	85281310	A	G	0.07647	NM_001554	uc001dle.4	85580760	+
7906622	LY9	rs35967351	0.161423	608	0.716816	0.0218995	0.979848	0.999431	NA	-0.000630471	0.540373	0.974744	NA	1	160742014	A	T	0.6706	NM_001033667	uc001fwt.5	160796186	+
8108066	UBE2B	rs756699	0.161459	609	0.716816	0.0189845	0.776673	0.99578	NA	-0.00514204	0.574778	0.977379	NA	5	134110884	A	G	0.8757	NM_003337	uc003kzh.4	134371178	+
7944335	CXCR5	rs533646	0.162256	610	0.716816	-0.0283386	0.815728	0.998203	NA	-0.00822757	0.88569	0.999408	NA	11	118696037	G	C	0.6607	NM_001716	uc001pue.5	118883765	+
8033969	RAVER1	rs2288904	0.162418	611	0.716816	0.0100344	0.0256088	0.908035	NA	0.0272322	0.0744932	0.944376	NA	19	10631494	G	A	0.7882	NM_133452	uc060tgv.1	10333638	-
7960635	SCARNA11	rs12296430	0.162853	612	0.716816	-0.0231633	0.101639	0.929176	NA	-0.0402013	0.264413	0.962732	NA	12	6394334	C	G	0.2235	NR_003012	uc001qpr.2	6581609	-
8067610	CHRNA4	rs6062314	0.162897	613	0.716816	0.0283677	0.941736	0.998203	NA	0.00163957	0.282465	0.962732	NA	20	63778360	A	G	0.91471	NM_000744	uc061ymc.1; uc061ymg.1; uc061ymi.1; uc061ymd.1; uc061ymj.1; uc061yml.1; uc061ymh.1; uc061yme.1; uc061ymf.1; uc002yes.4; uc010gke.2; uc061ymb.1; uc061ymn.1; uc061ymo.1	63346935; 63351131; 63356138; 63359699; 63359839; 63361165; 63361190; 63361304; 63361304; 63361343; 63361396; 63377993; 63378137; 63378401	-
8033969	RAVER1	rs34536443	0.162902	614	0.716816	-0.0229294	0.0118968	0.908035	NA	0.0303586	0.579214	0.978566	NA	19	10352442	C	G	0.97041	NM_133452	uc060tgv.1	10333638	-
8081822	C3orf30	rs1131265	0.163112	615	0.716816	0.0317083	0.0668176	0.908035	NA	-0.0537781	0.575829	0.977602	NA	3	119503609	C	G	0.8491	NM_152539	uc003ecb.1	119146149	+
8116070	PDLIM7	rs4976646	0.163113	616	0.716816	-0.0152648	0.173019	0.942254	NA	0.0283886	0.179291	0.962732	NA	5	177361569	G	A	0.3095	NM_005451	uc003mhc.3	177497583	-
8114191	RNU6-456P	rs756699	0.163141	617	0.716816	-0.0318522	0.393885	0.968985	NA	-0.0245024	0.390084	0.974744	NA	5	134110884	A	G	0.8757	ENST00000384493	uc063hbp.1	134500284	-
8111796	PRKAA1	rs4613763	0.164731	618	0.721481	-0.0200454	0.551973	0.989032	NA	0.00851977	0.192212	0.962732	NA	5	40392626	G	A	0.09412	NM_006251	uc003jmc.4	40798198	-
7961083	CLEC2B	rs10466829	0.164735	619	0.721481	0.0428678	0.428943	0.968985	NA	0.0456962	0.701148	0.998254	NA	12	9723495	A	G	0.5147	NM_005127	uc001qwn.4	9870136	-
8064111	RTEL1	rs2256814	0.16538	620	0.723138	0.00893729	0.737644	0.99578	NA	0.00406396	0.577678	0.978192	NA	20	63742630	A	G	0.2088	NM_001283009	uc032poz.2	63658311	+
7949021	RCOR2	rs694739	0.165826	621	0.723918	0.0147916	0.852267	0.998203	NA	0.00348227	0.145024	0.952715	NA	11	64329761	A	G	0.6382	NM_173587	uc001nyc.3	63916844	-
7908421	TROVE2	rs2760524	0.167795	622	0.729071	-0.0192467	0.704468	0.995524	NA	-0.00729139	0.288654	0.962732	NA	1	192561418	G	A	0.8412	NM_001042369	uc001gsw.4	193060056	+
7908421	TROVE2	rs1323292	0.167795	623	0.729071	-0.0192467	0.704468	0.995524	NA	-0.00729139	0.288654	0.962732	NA	1	192571891	A	G	0.8412	NM_001042369	uc001gsw.4	193060056	+
7975311	EXD2	rs2236262	0.167813	624	0.729071	0.0175181	0.272309	0.951976	NA	-0.0198194	0.863385	0.999408	NA	14	68794755	A	G	0.5529	NM_001193360	uc059cui.1; uc059cuf.1; uc059cuk.1; uc059cuj.1; uc059cul.1; uc059cum.1; uc059cuh.1; uc059cug.1; uc001xkt.4; uc059cue.1; uc001xkv.4; uc001xkw.4; uc010tte.2	69191812; 69191532; 69224129; 69191834; 69227949; 69235611; 69191805; 69191765; 69191530; 69191528; 69191510; 69191554; 69191765	+
7992071	MSLN	rs2744148	0.168502	625	0.730893	-0.0236337	0.316773	0.968985	NA	0.0238095	0.252319	0.962732	NA	16	1023552	G	A	0.1559	NM_001177355	uc002cjt.2	760761	+
8081822	C3orf30	rs1132200	0.169324	626	0.733287	0.0326772	0.0711139	0.908035	NA	-0.0566002	0.66049	0.986643	NA	3	119431989	C	T	0.8706	NM_152539	uc003ecb.1	119146149	+
8008900	CA4	rs8070345	0.169686	627	0.733684	0.00999636	0.587554	0.99462	NA	0.0084307	0.853409	0.999383	NA	17	59739396	A	G	0.5059	NM_000717	uc002iym.5	60149935	+
7960689	MLF2	rs1800693	0.170245	628	0.734929	-0.0105909	0.0980408	0.929176	NA	-0.0216829	0.110521	0.944376	NA	12	6330843	G	A	0.45	NM_005439	uc010sfi.3	6752916	-
8066598	ACOT8	rs4810485	0.17078	629	0.736064	0.011641	0.309408	0.968985	NA	-0.0157073	0.272884	0.962732	NA	20	46119308	A	C	0.2706	NM_005469	uc002xqa.3	45857406	-
8042161	PEX13	rs842639	0.171165	630	0.736279	0.0190748	0.219402	0.942254	NA	0.0298023	0.0869	0.944376	NA	2	60868110	A	G	0.6294	NM_002618	uc002sau.5	61017721	+
8083707	C3orf80	rs2243123	0.171373	631	0.736279	0.0180485	0.985309	0.999431	NA	-0.000412761	0.648971	0.985816	NA	3	159991864	G	A	0.3	NM_001168214	uc021xgp.2	160225635	+
7917359	ZNHIT6	rs11587876	0.171807	632	0.736977	0.022662	0.0950955	0.929176	NA	0.0424022	0.995492	0.999691	NA	1	85449500	A	G	0.7618	NM_001170670	uc010osc.2	85708433	-
8025659	ATG4D	rs2288904	0.172129	633	0.737189	-0.0141669	0.919895	0.998203	NA	0.00160162	0.905508	0.999408	NA	19	10631494	G	A	0.7882	NM_001281504	uc060tiz.1; uc010xlg.3; uc060tja.1; uc060tjb.1; uc002mov.5; uc060tjc.1; uc060tjd.1; uc060tje.1; uc060tjf.1; uc060tjg.1; uc060tjh.1; uc060tjj.1	10543894; 10543916; 10543916; 10543917; 10543917; 10543970; 10544282; 10544308; 10545009; 10545119; 10549028; 10551935	+
8074153	ACR	rs470119	0.172777	634	0.738799	-0.0240895	0.642207	0.99462	NA	0.0134483	0.173302	0.962732	NA	22	50528485	A	G	0.3882	NM_001097	uc003bnh.5	50738195	+
8067680	HELZ2	rs6062314	0.173239	635	0.739609	-0.0194589	0.470749	0.968985	NA	0.0121972	0.834773	0.998254	NA	20	63778360	A	G	0.91471	NM_001037335	uc061ynp.1	63572455	-
7975779	FOS	rs2300603	0.173626	636	0.740095	0.0238759	0.621854	0.99462	NA	-0.0122202	0.548828	0.974744	NA	14	75539214	A	G	0.7456	NM_005252	uc001xrn.4	75278773	+
7923233	KIF21B	rs55838263	0.175687	637	0.746919	-0.0186379	0.666663	0.99462	NA	0.00910564	0.303064	0.962732	NA	1	200905600	A	G	0.7118	NM_001252100	uc001gvs.3	201023700	-
7921298	FCRL2	rs2050568	0.176229	638	0.746919	-0.0196637	0.211063	0.942254	NA	-0.0340621	0.944901	0.999408	NA	1	157800451	G	A	0.5325	NM_030764	uc001fre.3	157777122	-
8108080	JADE2	rs756699	0.177275	639	0.746919	0.0217871	0.989587	0.999431	NA	-0.000278431	0.637702	0.985816	NA	5	134110884	A	G	0.8757	NM_001289984	uc003kzm.3	134525672	+
7944275	TMEM25	rs533646	0.177353	640	0.746919	-0.0175468	0.582374	0.99462	NA	0.0129361	0.443128	0.974744	NA	11	118696037	G	C	0.6607	NM_001144034	uc009zad.4; uc001pth.4; uc001ptm.3; uc058hys.1; uc058hyt.1; uc058hyu.1; uc058hyv.1; uc058hyw.1; uc001ptl.3; uc058hyx.1; uc058hyy.1; uc058hyz.1; uc058hza.1; uc058hzb.1; uc058hzc.1; uc058hzd.1; uc001pti.4; uc058hze.1; uc001ptk.5; uc058hzf.1; uc058hzg.1; uc058hzh.1; uc010rye.3; uc058hzi.1; uc058hzj.1; uc058hzk.1; uc058hzl.1; uc058hzm.1; uc058hzn.1; uc058hzo.1	118531040; 118531087; 118531087; 118531174; 118531191; 118531191; 118531191; 118531191; 118531198; 118531201; 118531201; 118531201; 118531201; 118531201; 118531201; 118531201; 118531201; 118531201; 118531201; 118531201; 118531202; 118531202; 118531208; 118531357; 118531389; 118531470; 118531495; 118531525; 118531572; 118533031	+
7993195	CIITA	rs6498184	0.177753	641	0.746919	-0.0160272	0.641297	0.99462	NA	0.00961965	0.275062	0.962732	NA	16	11342133	G	A	0.8235	NM_000246	uc002dai.5	10877197	+
8059596	TRIP12	rs9989735	0.177775	642	0.746919	-0.0138107	0.912385	0.998203	NA	-0.00148681	0.500621	0.974744	NA	2	230250739	C	G	0.1737	NM_001284214	uc002vpx.3	229921999	-
8110253	ZNF346	rs4976646	0.17807	643	0.746919	-0.0147438	0.0265998	0.908035	NA	0.0461121	0.827609	0.998254	NA	5	177361569	G	A	0.3095	NM_012279	uc003mfi.4	177022695	+
8111812	NA	rs6880778	0.178226	644	0.746919	-0.0177621	0.90266	0.998203	NA	-0.0030905	0.703293	0.998254	NA	5	40398994	G	A	0.5412	NA	uc063dfk.1	40790204	-
8126016	RN7SL502P	rs941816	0.178532	645	0.746919	0.0312236	0.886674	0.998203	NA	0.00517658	0.245197	0.962732	NA	6	36407527	G	A	0.1912	ENST00000481857	uc063oeg.1	36451201	-
8066697	SLC35C2	rs4810485	0.17858	646	0.746919	0.0120411	0.78966	0.996634	NA	0.00442691	0.31765	0.962732	NA	20	46119308	A	C	0.2706	NM_001281457	uc061xlv.1; uc061xlw.1; uc061xlx.1; uc061xma.1; uc061xmb.1; uc021wen.2; uc061xmc.1; uc061xlz.1; uc061xly.1; uc002xrq.5; uc002xrr.5; uc002xrp.5; uc010zxp.4	46353197; 46355195; 46357701; 46358506; 46358764; 46363174; 46364361; 46364381; 46364390; 46364395; 46364401; 46364404; 46364458	-
8154359	RPL18A	rs11554159	0.179175	647	0.746919	-0.0107824	0.994336	0.999431	NA	-0.000117514	0.452952	0.974744	NA	19	18175134	G	A	0.7235	AY779046	uc002nhp.4; uc060vnh.1; uc060vni.1; uc060vnj.1; uc060vnk.1; uc060vnl.1; uc060vnm.1	17859875; 17859920; 17859931; 17859952; 17860124; 17860762; 17861332	+
8054664	ZC3H8	rs17174870	0.179474	648	0.746919	-0.0194237	0.186099	0.942254	NA	-0.0299878	0.212943	0.962732	NA	2	111907624	G	A	0.7618	NM_032494	uc061mze.1	112255111	-
8102039	SLC9B1	rs7665090	0.179973	649	0.746919	-0.0207761	0.439658	0.968985	NA	-0.0219496	0.486926	0.974744	NA	4	102630446	G	A	0.5235	NM_001100874	uc003hwu.4	103019719	-
8007212	STAT5A	rs9891119	0.180138	650	0.746919	-0.0132929	0.147685	0.935905	NA	-0.0248384	0.768013	0.998254	NA	17	42355962	C	A	0.3265	NM_001288718	uc010cya.3	42287866	+
8007212	STAT5A	rs4796791	0.180138	651	0.746919	-0.0132929	0.147685	0.935905	NA	-0.0248384	0.768013	0.998254	NA	17	42378745	A	G	0.3265	NM_001288718	uc010cya.3	42287866	+
7944418	C2CD2L	rs533646	0.180284	652	0.746919	-0.0130241	0.733409	0.99578	NA	0.00598653	0.330354	0.962732	NA	11	118696037	G	C	0.6607	NM_001290474	uc058igg.1; uc058igh.1; uc058igi.1; uc058igj.1; uc058igk.1; uc001pvn.4; uc058igl.1; uc058igm.1; uc058ign.1; uc058igo.1	119102197; 119106714; 119106741; 119106749; 119106941; 119107382; 119110102; 119110586; 119111056; 119111560	+
8129861	IFNGR1	rs17066096	0.180484	653	0.746919	0.0155143	0.0207417	0.908035	NA	0.0456441	0.546654	0.974744	NA	6	137131771	G	A	0.2735	NM_000416	uc003qho.3	137219449	-
8035187	MED26	rs1870071	0.180557	654	0.746919	-0.0165148	0.399065	0.968985	NA	-0.0190993	0.964111	0.999408	NA	19	16394295	G	A	0.2882	NM_004831	uc002nen.2	16628206	-
7944339	RN7SL688P	rs533646	0.180623	655	0.746919	-0.0214971	0.763914	0.99578	NA	0.00846848	0.370878	0.970201	NA	11	118696037	G	C	0.6607	ENST00000471754	uc058ibu.1	118931215	+
8082012	SLC15A2	rs9282641	0.181029	656	0.746919	-0.0320133	0.236972	0.942254	NA	-0.0327446	0.860963	0.999383	NA	3	122077921	G	A	0.9	NM_001145998	uc011bjn.2	121894439	+
8077160	ARSA	rs470119	0.181255	657	0.746919	0.0241998	0.953342	0.998203	NA	-0.00168088	0.445458	0.974744	NA	22	50528485	A	G	0.3882	NM_000487	uc021wse.2	50628172	-
8048980	CAB39	rs10201872	0.181288	658	0.746919	-0.0180163	0.648079	0.99462	NA	-0.0090009	0.805688	0.998254	NA	2	230242009	A	G	0.1824	NM_001130849	uc010fxq.4	230713547	+
8089926	RN7SL172P	rs9282641	0.181763	659	0.747739	-0.0389505	0.436606	0.968985	NA	0.0263519	0.824566	0.998254	NA	3	122077921	G	A	0.9	ENST00000460535	uc062myk.1	121654296	-
8015681	CCR10	rs2293152	0.182202	660	0.748407	0.0206223	0.427074	0.968985	NA	0.0200975	0.641681	0.985816	NA	17	42329511	C	G	0.6235	NM_016602	uc002iax.5	42681843	-
8034055	KRI1	rs2288904	0.18374	661	0.753586	0.0188725	0.062938	0.908035	NA	0.0385031	0.0878166	0.944376	NA	19	10631494	G	A	0.7882	NM_023008	uc002moy.2	10566037	-
8125941	SRPK1	rs941816	0.184248	662	0.754525	-0.0136138	0.681035	0.99462	NA	-0.00647139	0.253902	0.962732	NA	6	36407527	G	A	0.1912	NM_003137	uc003olj.4	35921342	-
7897076	MORN1	rs4648356	0.184859	663	0.755687	0.020577	0.490381	0.968985	NA	0.0170103	0.463987	0.974744	NA	1	2792599	C	A	0.6716	AK055432	uc001ajb.2; uc009vld.4; uc001ajd.2; uc057bls.1; uc057blu.1; uc057blv.1; uc057blw.1; uc010nyy.3; uc057blx.1; uc057bly.1; uc057blz.1	2391707; 2391687; 2391707; 2375878; 2387529; 2385121; 2388337; 2391671; 2388509; 2388316; 2389996	-
7923189	KIF14	rs55838263	0.185501	664	0.755687	-0.0213838	0.903248	0.998203	NA	-0.00315869	0.17906	0.962732	NA	1	200905600	A	G	0.7118	NM_014875	uc010ppk.2	200620734	-
8033912	DNMT1	rs2288904	0.185756	665	0.755687	0.0139955	0.797282	0.997891	NA	0.00417787	0.504509	0.974744	NA	19	10631494	G	A	0.7882	NM_001130823	uc010xlc.3	10195079	-
7975324	GALNT16	rs4902647	0.185832	666	0.755687	-0.0156335	0.356325	0.968985	NA	0.0190164	0.324944	0.962732	NA	14	68787474	G	A	0.5824	NM_001168368	uc059cuo.1; uc059cup.1; uc059cuq.1; uc059cus.1; uc059cut.1; uc001xla.3; uc010aqu.3; uc059cuu.1; uc059cur.1; uc001xlb.3	69259276; 69259641; 69259641; 69298540; 69332521; 69260290; 69260200; 69352028; 69260173; 69259963	+
7917676	GLMN	rs41286801	0.18597	667	0.755687	-0.0218175	0.226755	0.942254	NA	0.0291052	0.204955	0.962732	NA	1	92509907	A	G	0.1941	NM_053274	uc001dor.4	92298976	-
7906652	NIT1	rs35967351	0.186204	668	0.755687	-0.012358	0.103072	0.929176	NA	-0.0266116	0.519675	0.974744	NA	1	160742014	A	T	0.6706	NM_001185092	uc001fxw.4	161118117	+
7944447	ABCG4	rs523604	0.187168	669	0.758245	-0.0144682	0.420771	0.968985	NA	-0.0163819	0.908539	0.999408	NA	11	118885029	A	G	0.5353	NM_001142505	uc031yhl.2	119149512	+
8030374	FCGRT	rs8107548	0.187394	670	0.758245	0.0147392	0.585511	0.99462	NA	-0.01139	0.147494	0.952715	NA	19	49367386	G	A	0.2647	NM_001136019	uc002poe.3	49512278	+
8007272	COASY	rs744166	0.188393	671	0.760821	0.0140691	0.163351	0.935905	NA	-0.0262726	0.345232	0.965277	NA	17	42362183	G	A	0.3971	NM_001042532	uc010cyj.5	42562150	+
7926037	PFKFB3	rs2104286	0.188592	672	0.760821	-0.0330844	0.622556	0.99462	NA	0.0198392	0.815839	0.998254	NA	10	6057082	A	G	0.7618	NM_001145443	uc001ijd.4	6144933	+
7923007	UCHL5	rs1359062	0.189063	673	0.761581	-0.0146611	0.198404	0.942254	NA	0.0229906	0.127339	0.944376	NA	1	192572342	C	G	0.8353	NM_001199262	uc001gsp.4	193059361	-
7959604	DDX55	rs949143	0.189342	674	0.761581	-0.014919	0.847615	0.998203	NA	-0.00404686	0.440762	0.974744	NA	12	123110616	G	A	0.3176	NM_020936	uc001ufi.4	123602098	+
8063115	MMP9	rs6074022	0.190894	675	0.762137	0.0307323	0.746909	0.99578	NA	0.0133396	0.914664	0.999408	NA	20	46111557	C	T	0.2735	NM_004994	uc002xqz.3	46008907	+
7996819	CDH3	rs1886700	0.191611	676	0.762137	0.0215327	0.95208	0.998203	NA	-0.00131211	0.67494	0.990132	NA	16	68652002	A	G	0.1382	NM_001793	uc002ewf.3	68644835	+
7948565	CYB561A3	rs650258	0.192276	677	0.762137	0.0121107	0.790886	0.996635	NA	-0.00474356	0.287876	0.962732	NA	11	61064810	G	A	0.65	NM_001161452	uc001nrg.4; uc010rlh.3; uc058caj.1; uc058cak.1; uc058cal.1; uc058cam.1; uc058can.1; uc058cao.1; uc058cap.1; uc058caq.1; uc058car.1; uc058cas.1; uc058cau.1; uc009yno.3; uc058cav.1; uc058caw.1; uc058cax.1; uc058cay.1; uc058caz.1; uc058cba.1; uc058cbb.1	61362299; 61362283; 61361913; 61361913; 61351284; 61361890; 61361853; 61361849; 61357279; 61356801; 61354741; 61357347; 61361264; 61356889; 61361885; 61361840; 61361876; 61362271; 61361882; 61362262; 61362248	-
7956426	INHBE	rs201202118	0.192875	678	0.762137	-0.0202494	0.683209	0.994659	NA	-0.0107452	0.264035	0.962732	NA	12	57788279	A	T	0.6964	NM_031479	uc001snw.4	57455320	+
7897280	HES3	rs3007421	0.193058	679	0.762137	0.0194982	0.797685	0.997934	NA	-0.00466062	0.0279978	0.907602	NA	1	6470129	A	G	0.1294	NM_001024598	uc009vly.2	6244191	+
8034043	S1PR5	rs8112449	0.193161	680	0.762137	-0.0111643	0.796227	0.997491	NA	-0.00405327	0.39695	0.974744	NA	19	10409388	G	A	0.6353	NM_001166215	uc002mou.3	10517931	-
8026520	RAB8A	rs1870071	0.193218	681	0.762137	-0.00904815	0.352849	0.968985	NA	0.0115878	0.688799	0.994886	NA	19	16394295	G	A	0.2882	NM_005370	uc002ndn.5	16111628	+
7921319	FCRL1	rs2050568	0.193307	682	0.762137	-0.0189206	0.321543	0.968985	NA	-0.027095	0.855507	0.999383	NA	1	157800451	G	A	0.5325	NM_001159397	uc001fri.4	157820089	-
7980316	TGFB3	rs2300603	0.193486	683	0.762137	-0.0216828	0.975218	0.999028	NA	-0.000774105	0.753116	0.998254	NA	14	75539214	A	G	0.7456	NM_003239	uc001xsc.3	75981191	-
7897068	SKI	rs3748817	0.193632	684	0.762137	-0.0127278	0.997837	0.999681	NA	-4.70297e-05	0.410774	0.974744	NA	1	2594226	A	G	0.6559	NM_003036	uc001aja.5	2228694	+
8007290	MLX	rs9891119	0.193671	685	0.762137	-0.0121085	0.491077	0.968985	NA	0.0108614	0.483146	0.974744	NA	17	42355962	C	A	0.3265	NM_170607	uc002iag.4	42567071	+
8007290	MLX	rs4796791	0.193671	686	0.762137	-0.0121085	0.491077	0.968985	NA	0.0108614	0.483146	0.974744	NA	17	42378745	A	G	0.3265	NM_170607	uc002iag.4	42567071	+
8081890	PLA1A	rs1131265	0.193782	687	0.762137	0.0226224	0.128801	0.932519	NA	-0.0348546	0.432038	0.974744	NA	3	119503609	C	G	0.8491	NM_001206960	uc003ecv.4	119597884	+
8017141	RNU4-13P	rs180515	0.193788	688	0.762137	-0.0235996	0.254695	0.951976	NA	-0.0402138	0.955739	0.999408	NA	17	59946914	G	A	0.35	ENST00000364019	uc060icp.1	59537499	-
8096663	CISD2	rs7665090	0.194021	689	0.762137	0.0177585	0.510496	0.972686	NA	0.0154332	0.204389	0.962732	NA	4	102630446	G	A	0.5235	NM_001008388	uc003hwt.5	102868977	+
8091735	IFT80	rs2243123	0.194312	690	0.762137	0.0204304	0.947232	0.998203	NA	-0.00166768	0.222863	0.962732	NA	3	159991864	G	A	0.3	ENST00000483754	uc062pnb.1; uc003fdb.3; uc003fde.3; uc062pnc.1; uc062pnd.1; uc062pne.1; uc062pnf.1; uc062png.1; uc062pnh.1; uc062pni.1; uc062pnj.1; uc062pnk.1; uc062pnl.1; uc062pnm.1; uc062pnn.1; uc062pno.1; uc062pnp.1; uc062pnq.1; uc062pnr.1; uc062pns.1; uc062pnt.1; uc062pnu.1; uc062pnv.1; uc062pnw.1; uc062pnx.1; uc062pny.1; uc062pnz.1	160399532; 160383656; 160399273; 160399209; 160268761; 160277478; 160307781; 160357499; 160320147; 160399221; 160377454; 160399207; 160399223; 160399544; 160399533; 160399223; 160399216; 160399223; 160399245; 160399216; 160399216; 160399247; 160399215; 160399544; 160399520; 160399247; 160399880	-
8052721	PPP3R1	rs7595717	0.19433	691	0.762137	-0.0119476	0.619755	0.99462	NA	0.00846141	0.39634	0.974744	NA	2	68360345	A	G	0.2647	NM_000945	uc002sei.2	68252531	-
7960700	RN7SL380P	rs1800693	0.19454	692	0.762137	0.0183743	0.992764	0.999431	NA	0.000227697	0.911246	0.999408	NA	12	6330843	G	A	0.45	ENST00000461702	uc058kku.1	6784161	-
7964575	RNU6-1083P	rs703842	0.195514	693	0.763319	-0.0254084	0.370745	0.968985	NA	-0.0316478	0.13467	0.948564	NA	12	57768956	A	G	0.6882	ENST00000384022	uc058qdr.1	57806260	-
7992145	SSTR5	rs2744148	0.195915	694	0.763319	0.0162763	0.266448	0.951976	NA	0.0197029	0.205306	0.962732	NA	16	1023552	G	A	0.1559	NM_001053	uc002ckq.4	1078780	+
8007250	NAGLU	rs744166	0.196269	695	0.763319	-0.0135315	0.137745	0.934639	NA	-0.0266247	0.220502	0.962732	NA	17	42362183	G	A	0.3971	NM_000263	uc002hzv.4	42536171	+
8026877	SLC5A5	rs874628	0.196423	696	0.763319	0.0128074	0.0638856	0.908035	NA	-0.0342294	0.642217	0.985816	NA	19	18193890	A	G	0.7	NM_000453	uc002nhr.4	17871972	+
8137874	CARD11	rs1843938	0.196433	697	0.763319	0.0183319	0.750212	0.99578	NA	0.00791194	0.0929787	0.944376	NA	7	3073400	A	G	0.4324	NM_032415	uc003smv.5	3043945	-
7976976	TECPR2	rs12148050	0.196531	698	0.763319	-0.0146691	0.408348	0.968985	NA	0.0157395	0.114651	0.944376	NA	14	102797451	A	G	0.3441	NM_001172631	uc010awl.4	102363078	+
8015655	FAM134C	rs2293152	0.197721	699	0.764836	0.0118364	0.373962	0.968985	NA	-0.0126202	0.240812	0.962732	NA	17	42329511	C	G	0.6235	NM_178126	uc060fkv.1	42609384	-
8091733	RNU2-31P	rs2243123	0.19787	700	0.764836	-0.0288917	0.0217131	0.908035	NA	-0.0877323	0.457983	0.974744	NA	3	159991864	G	A	0.3	ENST00000516954	uc062pmi.1	159808570	-
8089759	TMEM39A	rs1131265	0.198264	701	0.764836	0.0223832	0.00966245	0.908035	NA	0.0622209	0.394685	0.974744	NA	3	119503609	C	G	0.8491	NM_018266	uc003eck.3	119463682	-
8007302	TUBG1	rs744166	0.198523	702	0.764836	0.0176794	0.963495	0.998203	NA	-0.00105205	0.0819985	0.944376	NA	17	42362183	G	A	0.3971	NM_001070	uc002ian.4	42609675	+
8026954	PIK3R2	rs874628	0.198647	703	0.764836	0.0118177	0.665904	0.99462	NA	-0.00808292	0.576762	0.977602	NA	19	18193890	A	G	0.7	NM_005027	uc002nia.3	18153117	+
7986049	CRTC3	rs8042861	0.198749	704	0.764836	-0.0127081	0.325739	0.968985	NA	0.0184432	0.359472	0.970201	NA	15	90434101	A	C	0.4588	NM_001042574	uc002bpo.5	90529924	+
8025551	C19orf66	rs34536443	0.198897	705	0.764836	-0.0338524	0.612229	0.99462	NA	0.00920285	0.690259	0.994886	NA	19	10352442	C	G	0.97041	NM_018381	uc002mmu.5	10086129	+
8122265	TNFAIP3	rs7769192	0.199755	706	0.765452	0.0349693	0.0630686	0.908035	NA	0.101334	0.292024	0.962732	NA	6	137641518	G	A	0.5	NM_001270507	uc031spv.2; uc063rui.1; uc063ruj.1; uc003qhr.5; uc063ruk.1; uc063rul.1; uc063rum.1; uc063run.1; uc063ruo.1; uc063rup.1; uc063ruq.1	137867187; 137867213; 137867321; 137867443; 137867581; 137871210; 137871210; 137871210; 137871210; 137871210; 137875837	+
8081890	PLA1A	rs2293370	0.200058	707	0.765452	0.0224578	0.109081	0.929176	NA	-0.0374119	0.500401	0.974744	NA	3	119501087	G	A	0.8521	NM_001206960	uc003ecv.4	119597884	+
7923007	UCHL5	rs2760524	0.200187	708	0.765452	-0.0147316	0.220913	0.942254	NA	0.0221346	0.121541	0.944376	NA	1	192561418	G	A	0.8412	NM_001199262	uc001gsp.4	193059361	-
7923007	UCHL5	rs1323292	0.200187	709	0.765452	-0.0147316	0.220913	0.942254	NA	0.0221346	0.121541	0.944376	NA	1	192571891	A	G	0.8412	NM_001199262	uc001gsp.4	193059361	-
8025741	DNM2	rs34536443	0.20097	710	0.767221	-0.021007	0.530758	0.975333	NA	-0.00742586	0.8838	0.999408	NA	19	10352442	C	G	0.97041	NM_001005360	uc002mpt.3	10718162	+
8052742	FBXO48	rs7595717	0.201215	711	0.767221	0.0235995	0.327548	0.968985	NA	0.0290587	0.588167	0.981436	NA	2	68360345	A	G	0.2647	NM_001024680	uc002seo.5	68467258	-
8047257	SATB2-AS1	rs281783	0.201608	712	0.767639	-0.0242972	0.187344	0.942254	NA	-0.0334666	0.0102292	0.907602	NA	2	199886859	A	G	0.8118	NR_026830	uc002uvd.3	199468097	+
8089993	WDR5B	rs9282641	0.202714	713	0.770767	-0.0333012	0.134682	0.934639	NA	0.0441314	0.58194	0.978581	NA	3	122077921	G	A	0.9	NM_019069	uc003efa.2	122416051	-
7964575	RNU6-1083P	rs201202118	0.203214	714	0.771587	-0.0256742	0.368911	0.968985	NA	-0.0317338	0.142453	0.950247	NA	12	57788279	A	T	0.6964	ENST00000384022	uc058qdr.1	57806260	-
8089759	TMEM39A	rs1132200	0.203818	715	0.772798	0.0235399	0.00796717	0.908035	NA	0.0629812	0.645379	0.985816	NA	3	119431989	C	T	0.8706	NM_018266	uc003eck.3	119463682	-
7969776	UBAC2	rs4772201	0.204242	716	0.773324	-0.0171109	0.38973	0.968985	NA	-0.0148451	0.351874	0.970201	NA	13	99434005	A	G	0.8118	NM_001144072	uc001voa.5	99200773	+
8081822	C3orf30	rs2293370	0.205228	717	0.773802	0.0294025	0.0681019	0.908035	NA	-0.0549089	0.619606	0.985816	NA	3	119501087	G	A	0.8521	NM_152539	uc003ecb.1	119146149	+
8132832	DDC-AS1	rs201847125	0.205645	718	0.773802	-0.0163164	0.95438	0.998203	NA	-0.00129377	0.150397	0.952715	NA	7	50285971	G	A	0.7012	NR_033845	uc022adg.1	50531758	+
8042416	ARHGAP25	rs7595717	0.205701	719	0.773802	0.0149277	0.924373	0.998203	NA	-0.00194234	0.294772	0.962732	NA	2	68360345	A	G	0.2647	NM_001007231	uc010fdg.4	68734834	+
8066925	PTGIS	rs17785991	0.205754	720	0.773802	0.0174067	0.999892	0.999892	NA	3.36447e-06	0.742186	0.998254	NA	20	49822224	A	T	0.3265	NM_000961	uc002xut.4	49568146	-
7999419	DEXI	rs12708716	0.205795	721	0.773802	-0.0269167	0.0639137	0.908035	NA	0.0684663	0.333859	0.962732	NA	16	11086016	A	G	0.6941	NM_014015	uc002dal.4	10942460	-
8082075	DTX3L	rs9282641	0.207346	722	0.776695	-0.0234427	0.0574393	0.908035	NA	0.0411133	0.717052	0.998254	NA	3	122077921	G	A	0.9	NM_138287	uc003efk.4	122564237	+
8025788	SMARCA4	rs2288904	0.207369	723	0.776695	0.0125931	0.326095	0.968985	NA	-0.0123524	0.6276	0.985816	NA	19	10631494	G	A	0.7882	NM_001128844	uc010dxp.4	10961000	+
7967318	HCAR2	rs7132277	0.207424	724	0.776695	-0.0490371	0.146167	0.935905	NA	0.090383	0.910141	0.999408	NA	12	123108835	A	G	0.1941	NM_177551	uc001ucx.2	122703343	-
7998381	LMF1	rs2744148	0.208541	725	0.777807	-0.0250145	0.208637	0.942254	NA	-0.0352727	0.597066	0.985816	NA	16	1023552	G	A	0.1559	NM_022773	uc059otd.1	970999	-
8026496	LINC00661	rs1870071	0.209011	726	0.777807	-0.0195207	0.547038	0.98868	NA	0.0153021	0.60849	0.985816	NA	19	16394295	G	A	0.2882	NR_026828	uc002nbw.3	16015633	+
7931914	IL2RA	rs2104286	0.209017	727	0.777807	0.0217035	0.276149	0.951976	NA	0.0277352	0.400641	0.974744	NA	10	6057082	A	G	0.7618	NM_000417	uc001iiz.3	6062325	-
7948574	CPSF7	rs650258	0.209092	728	0.777807	-0.00897044	0.587895	0.99462	NA	-0.00776222	0.315617	0.962732	NA	11	61064810	G	A	0.65	NM_001136040	uc001nrq.4	61430031	-
7925978	FAM208B	rs2104286	0.20935	729	0.777807	-0.0156628	0.0972716	0.929176	NA	0.0333784	0.790611	0.998254	NA	10	6057082	A	G	0.7618	NM_017782	uc001iij.3	5684837	+
8002237	SLC7A6OS	rs1886700	0.209804	730	0.777807	0.016284	0.621381	0.99462	NA	-0.00900106	0.66128	0.986643	NA	16	68652002	A	G	0.1382	NM_032178	uc002evw.3	68310945	-
7956423	INHBC	rs12368653	0.210427	731	0.777807	-0.0194672	0.949711	0.998203	NA	0.00162792	0.669131	0.987612	NA	12	57739473	A	G	0.4765	NM_005538	uc001snv.3	57434759	+
8131195	AMZ1	rs1843938	0.210522	732	0.777807	-0.0122889	0.483312	0.968985	NA	0.0134159	0.119216	0.944376	NA	7	3073400	A	G	0.4324	NM_001284355	uc003sms.3	2688201	+
8025601	ICAM1	rs34536443	0.210961	733	0.777807	-0.0521152	0.563314	0.99462	NA	0.0166723	0.639329	0.985816	NA	19	10352442	C	G	0.97041	NM_000201	uc002mnq.3	10270834	+
8008087	NFE2L1	rs4239162	0.211142	734	0.777807	0.0116936	0.418138	0.968985	NA	-0.0138059	0.730583	0.998254	NA	17	47678444	G	A	0.5059	NM_003204	uc002imz.5	48048358	+
8015490	DNAJC7	rs744166	0.211295	735	0.777807	-0.0112489	0.257491	0.951976	NA	0.0180361	0.215876	0.962732	NA	17	42362183	G	A	0.3971	NM_001144766	uc010wgb.3	42017151	-
7932867	ZNF438	rs793108	0.211445	736	0.777807	0.0189643	0.780382	0.99578	NA	0.00735751	0.864631	0.999408	NA	10	31126177	A	G	0.4971	NM_001143766	uc057snu.1; uc057snw.1; uc057snx.1; uc001ivn.4; uc001ivo.5; uc010qeb.3; uc010qea.3; uc010qdz.3; uc010qdy.3	30923388; 30984426; 30984426; 30999517; 31031925; 31031937; 31031937; 31031937; 31031937	-
8050790	DNAJC27	rs4665719	0.212138	737	0.777807	0.0191941	0.859821	0.998203	NA	0.00440818	0.501116	0.974744	NA	2	24794991	G	A	0.2412	NM_001198559	uc010eyg.2	24972094	-
7981387	CDC42BPB	rs12148050	0.21215	738	0.777807	-0.0227425	0.731349	0.99578	NA	-0.00992525	0.952647	0.999408	NA	14	102797451	A	G	0.3441	NM_006035	uc001ymi.2	103057462	-
8116031	PFN3	rs4075958	0.212156	739	0.777807	-0.0139105	0.702406	0.995524	NA	-0.0073219	0.200848	0.962732	NA	5	177357511	A	G	0.2515	NM_001029886	uc003mgl.2	177400636	-
8064302	PCMTD2	rs6062314	0.212312	740	0.777807	-0.0193293	0.550003	0.988938	NA	0.0105585	0.289618	0.962732	NA	20	63778360	A	G	0.91471	NM_001104925	uc002yim.5	64255740	+
8015712	COA3	rs9891119	0.213074	741	0.778496	0.0125094	0.357336	0.968985	NA	0.0163832	0.253542	0.962732	NA	17	42355962	C	A	0.3265	NM_001040431	uc002ibl.5	42798704	-
8015712	COA3	rs4796791	0.213074	742	0.778496	0.0125094	0.357336	0.968985	NA	0.0163832	0.253542	0.962732	NA	17	42378745	A	G	0.3265	NM_001040431	uc002ibl.5	42798704	-
8089759	TMEM39A	rs2293370	0.213957	743	0.780668	0.0209661	0.0060562	0.908035	NA	0.0660009	0.591839	0.983186	NA	3	119501087	G	A	0.8521	NM_018266	uc003eck.3	119463682	-
8066598	ACOT8	rs2425752	0.214779	744	0.782616	0.00985452	0.313459	0.968985	NA	-0.0157793	0.6041	0.985816	NA	20	46073481	A	G	0.2853	NM_005469	uc002xqa.3	45857406	-
7923332	TNNT2	rs12122721	0.215165	745	0.782968	0.0186116	0.263321	0.951976	NA	-0.0256105	0.536663	0.974744	NA	1	201015352	G	A	0.7029	NM_000364	uc057ohb.1; uc009wzp.5; uc057ohc.1; uc001gwg.5; uc057ohd.1; uc057ohe.1; uc057ohf.1; uc057ohg.1; uc057ohh.1; uc057ohi.1; uc057ohj.1; uc001gwi.5; uc057ohk.1; uc057ohl.1; uc009wzs.2; uc057ohm.1; uc057ohn.1; uc057oho.1; uc057ohp.1; uc057ohq.1; uc057ohr.1; uc057ohs.1; uc057oht.1; uc057ohu.1; uc057ohv.1	201363350; 201364188; 201377661; 201377680; 201377680; 201373254; 201373254; 201373254; 201377700; 201373266; 201377664; 201377661; 201377762; 201377664; 201366966; 201361357; 201373315; 201377633; 201367808; 201377652; 201377664; 201368314; 201373265; 201375368; 201377680	-
7959473	DENR	rs1790100	0.216065	746	0.784573	-0.0209961	0.413689	0.968985	NA	-0.0203699	0.896318	0.999408	NA	12	123172178	G	T	0.2324	AB014731	uc001uda.4; uc058uoh.1; uc058uoi.1; uc058uoj.1	122752773; 122752823; 122752826; 122752846	+
7940959	GPR137	rs694739	0.216441	747	0.784573	0.0110312	0.518456	0.975333	NA	0.0106356	0.679909	0.99142	NA	11	64329761	A	G	0.6382	NM_001170726	uc010rni.3	64284338	+
8064042	ARFGAP1	rs2256814	0.216474	748	0.784573	0.00910465	0.241759	0.942651	NA	0.0147749	0.22256	0.962732	NA	20	63742630	A	G	0.2088	NM_001281482	uc002yen.5	63272832	+
8015715	BECN1	rs744166	0.217014	749	0.785481	0.0116386	0.672343	0.99462	NA	0.00702923	0.679554	0.99142	NA	17	42362183	G	A	0.3971	NM_003766	uc002ibn.3	42824263	-
7903022	SNORD21	rs41286801	0.217649	750	0.786727	-0.0359846	0.201187	0.942254	NA	0.0481861	0.790645	0.998254	NA	1	92509907	A	G	0.1941	NR_000006	uc001dpe.2	92837288	+
8003226	RNU1-103P	rs35929052	0.218397	751	0.78677	-0.035208	0.438144	0.968985	NA	-0.028567	0.382301	0.97225	NA	16	85960878	G	A	0.8824	ENST00000516502	uc059xzz.1	85781899	-
8108832	KIAA0141	rs35952555	0.218605	752	0.78677	-0.0137686	0.453645	0.968985	NA	-0.0124204	0.0321406	0.907602	NA	5	142126991	C	A	0.6029	NM_014773	uc003llt.4	141923807	+
7960559	IFFO1	rs12296430	0.218841	753	0.78677	0.0130267	0.0564164	0.908035	NA	0.035512	0.467436	0.974744	NA	12	6394334	C	G	0.2235	XM_006718979	uc058kgj.1; uc001qpa.3; uc001qpb.2; uc058kgk.1; uc001qpf.3; uc058kgl.1; uc058kgm.1; uc010sfe.3; uc001qpc.3; uc058kgn.1; uc058kgo.1; uc058kgp.1	6551900; 6549265; 6550467; 6551900; 6556071; 6556071; 6556071; 6556083; 6556073; 6556063; 6556071; 6549113	-
8007250	NAGLU	rs9891119	0.219112	754	0.78677	-0.0134594	0.132006	0.934639	NA	-0.0275321	0.191575	0.962732	NA	17	42355962	C	A	0.3265	NM_000263	uc002hzv.4	42536171	+
8007250	NAGLU	rs4796791	0.219112	755	0.78677	-0.0134594	0.132006	0.934639	NA	-0.0275321	0.191575	0.962732	NA	17	42378745	A	G	0.3265	NM_000263	uc002hzv.4	42536171	+
7975311	EXD2	rs4902647	0.219694	756	0.787146	0.0147249	0.327927	0.968985	NA	-0.0178169	0.754426	0.998254	NA	14	68787474	G	A	0.5824	NM_001193360	uc059cui.1; uc059cuf.1; uc059cuk.1; uc059cuj.1; uc059cul.1; uc059cum.1; uc059cuh.1; uc059cug.1; uc001xkt.4; uc059cue.1; uc001xkv.4; uc001xkw.4; uc010tte.2	69191812; 69191532; 69224129; 69191834; 69227949; 69235611; 69191805; 69191765; 69191530; 69191528; 69191510; 69191554; 69191765	+
7953291	CD9	rs1800693	0.219797	757	0.787146	-0.109345	0.649155	0.99462	NA	0.0928871	0.688343	0.994886	NA	12	6330843	G	A	0.45	NM_001769	uc001qnq.3	6200448	+
7960654	ING4	rs12296430	0.221389	758	0.791801	-0.0136917	0.730582	0.99578	NA	-0.0062788	0.486762	0.974744	NA	12	6394334	C	G	0.2235	NM_001127583	uc001qpx.5	6663101	-
8114805	FGF1	rs35952555	0.222197	759	0.793645	-0.0226266	0.660566	0.99462	NA	0.0122881	0.45735	0.974744	NA	5	142126991	C	A	0.6029	NM_000800	uc003lmm.5; uc063ifa.1; uc031slk.2; uc031sln.2; uc031slm.2; uc003lmp.6; uc063ifb.1; uc003lmn.6; uc031slo.2; uc063iex.1; uc003lmr.4; uc003lmq.4; uc063iew.1; uc063iey.1; uc063iez.1; uc003lms.5	142621342; 142644201; 142644301; 142685672; 142685703; 142686051; 142686066; 142686385; 142686495; 142698021; 142698046; 142698046; 142698052; 142698052; 142698052; 142698070	-
8066619	PLTP	rs2425752	0.223971	760	0.797275	0.0160502	0.699659	0.995524	NA	-0.00931885	0.0482935	0.944376	NA	20	46073481	A	G	0.2853	NM_001242921	uc002xql.3	45910937	-
8007272	COASY	rs2293152	0.224608	761	0.797275	0.0142036	0.131126	0.934639	NA	-0.0282067	0.459569	0.974744	NA	17	42329511	C	G	0.6235	NM_001042532	uc010cyj.5	42562150	+
7908397	RGS13	rs1359062	0.22477	762	0.797275	-0.0268564	0.992964	0.999431	NA	0.000275108	0.161463	0.953651	NA	1	192572342	C	G	0.8353	NM_002927	uc001gsj.4	192636144	+
7934698	SFTPA2	rs1250550	0.224904	763	0.797275	-0.0116718	0.201418	0.942254	NA	-0.0226991	0.756726	0.998254	NA	10	79300560	A	C	0.3588	NM_001098668	uc001kal.5	79560395	-
7934708	SFTPA2	rs1250550	0.224904	764	0.797275	-0.0116718	0.201418	0.942254	NA	-0.0226991	0.756726	0.998254	NA	10	79300560	A	C	0.3588	NM_001098668	uc001kal.5	79560395	-
8008900	CA4	rs180515	0.226015	765	0.797275	0.00930148	0.622775	0.99462	NA	0.00764995	0.184768	0.962732	NA	17	59946914	G	A	0.35	NM_000717	uc002iym.5	60149935	+
7918900	RNU6-817P	rs1335532	0.226057	766	0.797275	0.0272781	0.836483	0.998203	NA	-0.00569317	0.700737	0.998254	NA	1	116558335	A	G	0.8647	ENST00000391083	uc057jsb.1	116413869	-
8007028	CASC3	rs12946510	0.226117	767	0.797275	-0.00943508	0.222888	0.942254	NA	0.0172993	0.0942413	0.944376	NA	17	39756124	A	G	0.4912	NM_007359	uc002hue.4	40140322	+
7960464	VWF	rs12296430	0.226124	768	0.797275	0.0207136	0.0804264	0.908035	NA	0.0447947	0.809056	0.998254	NA	12	6394334	C	G	0.2235	NM_000552	uc001qnn.2	6124675	-
8063078	CTSA	rs2425752	0.226155	769	0.797275	0.00720714	0.235985	0.942254	NA	0.0140073	0.719037	0.998254	NA	20	46073481	A	G	0.2853	NM_000308	uc002xqh.4	45891043	+
7923189	KIF14	rs7522462	0.226536	770	0.797582	-0.0188438	0.876936	0.998203	NA	-0.00402999	0.231503	0.962732	NA	1	200912467	G	A	0.7176	NM_014875	uc010ppk.2	200620734	-
7925996	FBXO18	rs62626317	0.227813	771	0.799151	-0.0148883	0.151863	0.935905	NA	-0.0237826	0.181962	0.962732	NA	10	6068962	A	G	0.8324	NM_001258452	uc057rkw.1; uc057rkx.1; uc057rky.1; uc057rkv.1; uc057rkz.1; uc057rla.1; uc057rlb.1; uc057rld.1; uc057rle.1; uc057rlf.1; uc057rlg.1; uc057rlc.1; uc057rli.1; uc001iis.5; uc001iit.5; uc057rku.1	5890279; 5903165; 5906505; 5890247; 5914177; 5917061; 5921345; 5923570; 5925263; 5925410; 5925410; 5921353; 5936632; 5890230; 5894385; 5890202	+
7926037	PFKFB3	rs3118470	0.228129	772	0.799151	0.0279528	0.663977	0.99462	NA	0.0173682	0.772418	0.998254	NA	10	6059750	G	A	0.3294	NM_001145443	uc001ijd.4	6144933	+
7986160	UNC45A	rs8042861	0.22855	773	0.799151	-0.00843339	0.52303	0.975333	NA	-0.00894593	0.545161	0.974744	NA	15	90434101	A	C	0.4588	XM_005254963	uc059nig.1; uc059nih.1; uc002bqd.3; uc059nii.1; uc059nip.1; uc059niq.1; uc059nir.1; uc010uqp.2; uc002bqg.4; uc059nis.1; uc059nit.1; uc059niu.1; uc059niv.1; uc032cpj.2; uc021suj.2	90930179; 90930179; 90930179; 90930217; 90935284; 90935284; 90935284; 90935284; 90935284; 90935309; 90935423; 90942442; 90945035; 90947236; 90949352	+
8064203	ABHD16B	rs6062314	0.229273	774	0.799151	-0.0250416	0.675955	0.99462	NA	-0.0101431	0.160525	0.953651	NA	20	63778360	A	G	0.91471	NM_080622	uc002ygx.3	63861497	+
7972973	SETD8	rs7132277	0.22939	775	0.799151	-0.0209271	0.115798	0.929176	NA	0.0452204	0.0383887	0.937584	NA	12	123108835	A	G	0.1941	AF287261	uc058usx.1; uc001uew.4; uc058usy.1; uc058usz.1; uc058uta.1; uc058utb.1; uc058utc.1; uc058utd.1; uc058ute.1	123383772; 123383772; 123384165; 123384172; 123388899; 123389270; 123389482; 123390041; 123391379	+
7990729	CHRNB4	rs59772922	0.229414	776	0.799151	-0.0198437	0.527849	0.975333	NA	0.0147168	0.636693	0.985816	NA	15	78915124	A	G	0.8441	NM_000750	uc002bed.2	78641245	-
7999431	PRM3	rs7191700	0.229738	777	0.799151	0.0165633	0.570486	0.99462	NA	-0.0142528	0.396734	0.974744	NA	16	11312946	C	T	0.6627	NM_021247	uc002dat.3	11273641	-
7964484	B4GALNT1	rs201202118	0.229786	778	0.799151	-0.0158499	0.0821132	0.908035	NA	-0.0407644	0.0851308	0.944376	NA	12	57788279	A	T	0.6964	NM_001276469	uc001spi.5	57633202	-
7975779	FOS	rs4903324	0.230053	779	0.799151	0.0239265	0.531075	0.975333	NA	-0.0155672	0.525642	0.974744	NA	14	75495168	A	G	0.2088	NM_005252	uc001xrn.4	75278773	+
8026877	SLC5A5	rs11554159	0.230177	780	0.799151	0.0118034	0.0531121	0.908035	NA	-0.0352896	0.624238	0.985816	NA	19	18175134	G	A	0.7235	NM_000453	uc002nhr.4	17871972	+
7967358	PITPNM2	rs7132277	0.230317	781	0.799151	-0.0182103	0.255272	0.951976	NA	-0.0264778	0.825127	0.998254	NA	12	123108835	A	G	0.1941	NM_020845	uc001uej.2	123110428	-
7993248	RMI2	rs6498184	0.23102	782	0.799151	-0.0151201	0.695049	0.995524	NA	-0.00802326	0.810883	0.998254	NA	16	11342133	G	A	0.8235	NM_152308	uc002daw.2	11345430	+
7944418	C2CD2L	rs523604	0.231029	783	0.799151	0.0107344	0.691275	0.995524	NA	0.00666253	0.304177	0.962732	NA	11	118885029	A	G	0.5353	NM_001290474	uc058igg.1; uc058igh.1; uc058igi.1; uc058igj.1; uc058igk.1; uc001pvn.4; uc058igl.1; uc058igm.1; uc058ign.1; uc058igo.1	119102197; 119106714; 119106741; 119106749; 119106941; 119107382; 119110102; 119110586; 119111056; 119111560	+
8034075	CDKN2D	rs8112449	0.231108	784	0.799151	-0.0143238	0.315597	0.968985	NA	-0.0201221	0.330712	0.962732	NA	19	10409388	G	A	0.6353	NM_001800	uc002mpa.4; uc002mpb.4	10568978; 10569059	-
7928558	ZMIZ1	rs1782645	0.232048	785	0.801379	0.0105077	0.705261	0.995524	NA	0.00649562	0.252228	0.962732	NA	10	79288854	A	G	0.4441	NM_020338	uc001kaf.3	79069034	+
7956426	INHBE	rs703842	0.232725	786	0.801863	-0.0179551	0.71046	0.995524	NA	-0.00999054	0.248906	0.962732	NA	12	57768956	A	G	0.6882	NM_031479	uc001snw.4	57455320	+
7959638	TCTN2	rs1790100	0.232812	787	0.801863	-0.0314773	0.344389	0.968985	NA	-0.0371861	0.94739	0.999408	NA	12	123172178	G	T	0.2324	NM_001143850	uc009zya.4	123671112	+
8003204	GINS2	rs35929052	0.233211	788	0.801863	-0.0282628	0.971317	0.998203	NA	-0.00107865	0.213989	0.962732	NA	16	85960878	G	A	0.8824	NM_016095	uc002fja.4	85688999	-
7993185	NUBP1	rs4780346	0.233372	789	0.801863	0.0122017	0.524646	0.975333	NA	0.00902265	0.31486	0.962732	NA	16	11194949	A	G	0.2618	NM_001278506	uc002dab.3	10743854	+
8015715	BECN1	rs9891119	0.234644	790	0.802998	0.0119366	0.635972	0.99462	NA	0.00781799	0.646073	0.985816	NA	17	42355962	C	A	0.3265	NM_003766	uc002ibn.3	42824263	-
8015715	BECN1	rs4796791	0.234644	791	0.802998	0.0119366	0.635972	0.99462	NA	0.00781799	0.646073	0.985816	NA	17	42378745	A	G	0.3265	NM_003766	uc002ibn.3	42824263	-
8064245	TCEA2	rs2256814	0.234823	792	0.802998	-0.0132066	0.416518	0.968985	NA	0.0151478	0.900814	0.999408	NA	20	63742630	A	G	0.2088	NM_003195	uc061yqu.1	64063143	+
8109612	ADRA1B	rs11743296	0.234886	793	0.802998	-0.01638	0.468271	0.968985	NA	0.0133607	0.756482	0.998254	NA	5	159497075	A	G	0.1559	NM_000679	uc003lxt.2	159916782	+
8138749	HOXA9	rs706015	0.235873	794	0.804214	-0.0318197	0.902328	0.998203	NA	0.00483932	0.775365	0.998254	NA	7	26975369	C	A	0.1824	NM_152739	uc003syt.4	27165530	-
7918900	RNU6-817P	rs2300747	0.236864	795	0.804214	0.0269215	0.819074	0.998203	NA	-0.00648866	0.667985	0.987612	NA	1	116561593	A	G	0.8676	ENST00000391083	uc057jsb.1	116413869	-
8042381	PNO1	rs7592330	0.237165	796	0.804214	0.0180147	0.118036	0.929176	NA	0.0406399	0.838938	0.998254	NA	2	68419651	A	G	0.5853	NM_020143	uc002seh.5	68157843	+
8042381	PNO1	rs7595037	0.237165	797	0.804214	0.0180147	0.118036	0.929176	NA	0.0406399	0.838938	0.998254	NA	2	68419963	A	G	0.5824	NM_020143	uc002seh.5	68157843	+
8123101	C6orf99	rs1738074	0.237321	798	0.804214	0.0352126	0.39338	0.968985	NA	-0.047846	0.650634	0.985816	NA	6	159044945	G	A	0.6147	NM_001195032	uc063soc.1; uc063sod.1; uc063soe.1; uc063sof.1	158869938; 158870168; 158895216; 158908836	+
7999478	TXNDC11	rs7191700	0.237483	799	0.804214	-0.00909788	0.321183	0.968985	NA	-0.0141025	0.468833	0.974744	NA	16	11312946	C	T	0.6627	NM_015914	uc002dbg.2	11742878	-
8148315	POU5F1B	rs2456449	0.23751	800	0.804214	0.0259543	0.191971	0.942254	NA	-0.0402039	0.113458	0.944376	NA	8	127180736	G	A	0.3794	NM_001159542	uc003ysf.4	127414289	+
8008052	SP2	rs4239162	0.238831	801	0.804214	0.012974	0.156076	0.935905	NA	0.0290482	0.33412	0.962732	NA	17	47678444	G	A	0.5059	BC016680	uc060grc.1; uc002imk.3	47896149; 47896149	+
7986092	FURIN	rs8042861	0.238984	802	0.804214	0.0078913	0.91175	0.998203	NA	-0.00138989	0.84352	0.998254	NA	15	90434101	A	C	0.4588	NM_001289823	uc032cpf.1	90871538	+
8041638	RNU6-137P	rs12466022	0.239063	803	0.804214	0.0292042	0.327243	0.968985	NA	-0.0348368	0.919322	0.999408	NA	2	43131922	C	A	0.7147	ENST00000363680	uc061ipx.1	42712739	+
8115543	EBF1	rs2546890	0.239154	804	0.804214	-0.0142385	0.790665	0.996635	NA	-0.00624143	0.927438	0.999408	NA	5	159332892	A	G	0.497	NM_001290360	uc063jes.1; uc063jeo.1; uc063jev.1; uc063jep.1; uc063jeq.1; uc063jeu.1; uc063jey.1; uc003lxl.7; uc063jer.1; uc010jip.4; uc063jet.1	158708009; 158840123; 159019129; 159073794; 159096370; 159096606; 159097623; 159099693; 159099757; 159099761; 159099761	-
8128258	RN7SKP110	rs12212193	0.239527	805	0.804214	0.015512	0.853757	0.998203	NA	0.00416435	0.831359	0.998254	NA	6	90287050	G	A	0.5148	ENST00000410146	uc021zcs.1	90001506	-
7947928	C1QTNF4	rs7120737	0.23962	806	0.804214	0.0148608	0.0716983	0.908035	NA	0.0308005	0.294828	0.962732	NA	11	47680843	G	A	0.1324	NM_031909	uc001ngc.3	47594659	-
8066619	PLTP	rs6074022	0.239828	807	0.804214	0.0166506	0.715183	0.99578	NA	-0.00874372	0.150506	0.952715	NA	20	46111557	C	T	0.2735	NM_001242921	uc002xql.3	45910937	-
8007414	AOC2	rs744166	0.239861	808	0.804214	0.01699	0.752406	0.99578	NA	0.00735584	0.138997	0.948749	NA	17	42362183	G	A	0.3971	NM_001158	uc002ibt.5	42844600	+
8025563	P2RY11	rs34536443	0.239989	809	0.804214	-0.0290225	0.0765089	0.908035	NA	0.030296	0.817527	0.998254	NA	19	10352442	C	G	0.97041	NM_002566	uc002mnc.4	10111537	+
7928589	PPIF	rs1250550	0.240607	810	0.804257	0.0216191	0.770954	0.99578	NA	0.00852759	0.852947	0.999383	NA	10	79300560	A	C	0.3588	ENST00000472580	uc057ulc.1	79347468	+
8085912	RNU6-342P	rs11129295	0.241061	811	0.804257	-0.024323	0.664282	0.99462	NA	0.0153323	0.584772	0.979196	NA	3	27747289	A	G	0.3853	ENST00000384521	uc062hqi.1	27265683	-
7948511	VWCE	rs34383631	0.241099	812	0.804257	-0.0126425	0.785756	0.996634	NA	0.00500526	0.669597	0.987612	NA	11	61025858	A	G	0.4676	NM_152718	uc001nra.4	61295424	-
7960702	CDCA3	rs12296430	0.241649	813	0.804257	-0.0168111	0.976132	0.999028	NA	0.000664387	0.663035	0.987249	NA	12	6394334	C	G	0.2235	NM_031299	uc001qrg.3	6852066	-
7940372	TMEM109	rs34383631	0.241707	814	0.804257	0.0106578	0.991572	0.999431	NA	-0.000175695	0.416602	0.974744	NA	11	61025858	A	G	0.4676	NM_024092	uc001nqg.4	60913873	+
8030374	FCGRT	rs2303759	0.241782	815	0.804257	0.0126722	0.626572	0.99462	NA	-0.0102689	0.124139	0.944376	NA	19	49365794	C	A	0.2692	NM_001136019	uc002poe.3	49512278	+
8007355	VPS25	rs9891119	0.243305	816	0.807251	-0.010876	0.742593	0.99578	NA	-0.00538878	0.728467	0.998254	NA	17	42355962	C	A	0.3265	NM_032353	uc002ibi.5	42773435	+
8007355	VPS25	rs4796791	0.243305	817	0.807251	-0.010876	0.742593	0.99578	NA	-0.00538878	0.728467	0.998254	NA	17	42378745	A	G	0.3265	NM_032353	uc002ibi.5	42773435	+
7992181	TPSAB1	rs2744148	0.243575	818	0.807251	0.0148057	0.816267	0.998203	NA	0.00438478	0.824158	0.998254	NA	16	1023552	G	A	0.1559	NM_003294	uc002ckz.4	1240695	+
8033987	ICAM3	rs8112449	0.24498	819	0.809993	0.0183538	0.0281804	0.908035	NA	-0.0538895	0.115355	0.944376	NA	19	10409388	G	A	0.6353	NM_002162	uc002mob.3	10339823	-
7917728	FAM69A	rs41286801	0.245	820	0.809993	-0.0512911	0.51274	0.972686	NA	-0.036248	0.187072	0.962732	NA	1	92509907	A	G	0.1941	NM_001006605	uc001dpg.4	92961500	-
8035477	ELL	rs11554159	0.245778	821	0.810661	0.0102138	0.665716	0.99462	NA	0.00768167	0.716876	0.998254	NA	19	18175134	G	A	0.7235	NM_006532	uc002njh.3	18522127	-
8007312	TUBG2	rs744166	0.2458	822	0.810661	0.0253538	0.604085	0.99462	NA	0.0196441	0.764864	0.998254	NA	17	42362183	G	A	0.3971	NM_016437	uc010wgr.3	42659304	+
7908639	C1orf106	rs12122721	0.246429	823	0.810883	0.0169404	0.978111	0.999028	NA	0.000607858	0.773597	0.998254	NA	1	201015352	G	A	0.7029	NM_001142569	uc010ppm.3	200894820	+
8035345	INSL3	rs11554159	0.246608	824	0.810883	-0.0162218	0.427498	0.968985	NA	0.0200114	0.477137	0.974744	NA	19	18175134	G	A	0.7235	NM_001265587	uc010ebf.3	17821574	-
7960666	ZNF384	rs12296430	0.24681	825	0.810883	0.00812828	0.0306741	0.908035	NA	0.0256781	0.486952	0.974744	NA	12	6394334	C	G	0.2235	NM_133476	uc001qqa.4	6689510	-
8090018	PARP9	rs2255214	0.247064	826	0.810883	-0.0168938	0.198707	0.942254	NA	0.0376745	0.802368	0.998254	NA	3	122051692	C	A	0.5147	NM_001146102	uc003efi.5; uc003efg.5; uc003efh.5; uc062nan.1; uc011bjs.4; uc003efj.3; uc062nao.1	122564577; 122564253; 122564577; 122546003; 122564242; 122564315; 122564242	-
8057771	STAT4	rs9967792	0.247925	827	0.812407	0.025397	0.425572	0.968985	NA	-0.0318453	0.292689	0.962732	NA	2	191109709	G	A	0.6618	NM_003151	uc002usm.3	191151260	-
8110347	SLC34A1	rs4075958	0.248127	828	0.812407	0.016055	0.418987	0.968985	NA	0.0191964	0.40392	0.974744	NA	5	177357511	A	G	0.2515	NM_003052	uc003mgk.5	177384443	+
7928600	EIF5AL1	rs1250542	0.249303	829	0.812411	0.0096747	0.57466	0.99462	NA	-0.00717786	0.498382	0.974744	NA	10	79274913	A	G	0.3946	NM_001099692	uc009xrx.4	79512600	+
7996785	PRMT7	rs1886700	0.249388	830	0.812411	0.0189695	0.903847	0.998203	NA	0.00255995	0.79344	0.998254	NA	16	68652002	A	G	0.1382	NM_001184824	uc010vlg.3	68311055	+
8110318	PRELID1	rs4075958	0.249533	831	0.812411	-0.0128452	0.70953	0.995524	NA	0.00758903	0.118502	0.944376	NA	5	177357511	A	G	0.2515	NM_001271828	uc021yiq.3	177303820	+
7923233	KIF21B	rs7522462	0.249592	832	0.812411	-0.015718	0.722622	0.99578	NA	0.00807665	0.23858	0.962732	NA	1	200912467	G	A	0.7176	NM_001252100	uc001gvs.3	201023700	-
7964460	DDIT3	rs201202118	0.249757	833	0.812411	0.0198063	0.00246534	0.603561	NA	-0.0862735	0.187467	0.962732	NA	12	57788279	A	T	0.6964	NM_001195053	uc021qzj.2; uc009zpt.4; uc058pxu.1; uc001soi.4; uc058pxv.1; uc009zps.4; uc058pxw.1	57520492; 57520517; 57517743; 57520517; 57520511; 57520511; 57520511	-
7926021	RBM17	rs2104286	0.250014	834	0.812411	0.0122053	0.485723	0.968985	NA	0.0127084	0.955461	0.999408	NA	10	6057082	A	G	0.7618	NM_001145547	uc010qav.3	6089345	+
8038395	NOSIP	rs8107548	0.250611	835	0.812411	-0.0108018	0.414926	0.968985	NA	0.0149061	0.790991	0.998254	NA	19	49367386	G	A	0.2647	NM_001270960	uc061bfk.1; uc061bfl.1; uc061bfm.1; uc002pol.5; uc061bfn.1; uc061bfo.1; uc061bfp.1; uc061bfq.1; uc061bfr.1; uc061bfs.1; uc061bft.1; uc061bfu.1; uc061bfv.1; uc061bfw.1; uc061bfx.1; uc061bfy.1	49560630; 49580535; 49580558; 49580572; 49580555; 49557295; 49560049; 49590262; 49560691; 49580532; 49580556; 49579278; 49560050; 49560397; 49560037; 49580547	-
8114119	FSTL4	rs756699	0.250903	836	0.812411	-0.0188234	0.410657	0.968985	NA	-0.0185254	0.203913	0.962732	NA	5	134110884	A	G	0.8757	NM_015082	uc003kyn.2	133612564	-
8064203	ABHD16B	rs2256814	0.251296	837	0.812411	-0.0178561	0.742661	0.99578	NA	-0.00793051	0.741081	0.998254	NA	20	63742630	A	G	0.2088	NM_080622	uc002ygx.3	63861497	+
7980265	ACYP1	rs2300603	0.251374	838	0.812411	0.0211169	0.917058	0.998203	NA	0.00296206	0.106113	0.944376	NA	14	75539214	A	G	0.7456	NM_001107	uc059dmm.1; uc001xrf.4; uc059dmn.1; uc059dml.1; uc001xrg.4; uc059dmk.1	75064007; 75064015; 75064020; 75064027; 75064049; 75069483	-
8067792	SAMD10	rs6062314	0.251425	839	0.812411	-0.0185652	0.216931	0.942254	NA	0.022827	0.583306	0.978581	NA	20	63778360	A	G	0.91471	NM_080621	uc002yhm.2	63979642	-
8014916	ORMDL3	rs12946510	0.25215	840	0.812961	-0.0133643	0.972429	0.998203	NA	0.000706572	0.7393	0.998254	NA	17	39756124	A	G	0.4912	NM_139280	uc002htj.3	39927601	-
8016390	COPZ2	rs4239162	0.252777	841	0.812961	-0.019959	0.765913	0.99578	NA	-0.00943469	0.625165	0.985816	NA	17	47678444	G	A	0.5059	NM_016429	uc032flu.2	48037782	-
8021416	MIR122	rs7238078	0.253297	842	0.812961	0.0277316	0.982535	0.999431	NA	-0.000767915	0.568205	0.977379	NA	18	58716960	A	C	0.7824	NR_029667	uc060poy.1	58451067	+
8047159	RNU6-1045P	rs9967792	0.253603	843	0.812961	0.0230332	0.136026	0.934639	NA	-0.0559299	0.536472	0.974744	NA	2	191109709	G	A	0.6618	ENST00000516321	uc061qtz.1	191370937	+
8116086	DOK3	rs4075958	0.254173	844	0.812961	0.0128848	0.382165	0.968985	NA	-0.0175814	0.523013	0.974744	NA	5	177357511	A	G	0.2515	NM_001144875	uc003mhi.5	177510385	-
7993259	SNN	rs7191700	0.254227	845	0.812961	0.0129315	0.245289	0.948912	NA	-0.0242433	0.373081	0.970201	NA	16	11312946	C	T	0.6627	NM_003498	uc002dbf.5	11668413	+
7948511	VWCE	rs650258	0.25435	846	0.812961	0.0112793	0.815702	0.998203	NA	0.00435444	0.381333	0.97225	NA	11	61064810	G	A	0.65	NM_152718	uc001nra.4	61295424	-
7911750	HES5	rs3748817	0.254361	847	0.812961	-0.0103474	0.674817	0.99462	NA	-0.0066206	0.23901	0.962732	NA	1	2594226	A	G	0.6559	NM_001010926	uc001ajn.3	2530245	-
7961083	CLEC2B	rs11052877	0.254645	848	0.812961	0.0364569	0.42085	0.968985	NA	0.0454884	0.242618	0.962732	NA	12	9753094	G	A	0.3882	NM_005127	uc001qwn.4	9870136	-
7972548	GPR18	rs4772201	0.254651	849	0.812961	-0.0365132	0.707879	0.995524	NA	0.0148522	0.10681	0.944376	NA	13	99434005	A	G	0.8118	NM_001098200	uc010afv.4	99258428	-
8026564	KLF2	rs1870071	0.255176	850	0.812961	0.0137645	0.890136	0.998203	NA	-0.00282957	0.290768	0.962732	NA	19	16394295	G	A	0.2882	NM_016270	uc002ndw.4	16324816	+
8064191	TPD52L2	rs2256814	0.25567	851	0.812961	0.0105528	0.660727	0.99462	NA	-0.00616564	0.18783	0.962732	NA	20	63742630	A	G	0.2088	NM_001243891	uc011abl.3; uc021wgf.1; uc021wgg.1; uc002yhc.4; uc002yhd.4; uc002ygz.4; uc002ygy.4; uc002yha.4; uc002yhb.4; uc061yqa.1	63865242; 63865227; 63865227; 63865289; 63865289; 63865289; 63865293; 63865293; 63865293; 63886881	+
8015712	COA3	rs744166	0.256115	852	0.812961	0.0107014	0.38789	0.968985	NA	0.0153915	0.470211	0.974744	NA	17	42362183	G	A	0.3971	NM_001040431	uc002ibl.5	42798704	-
7952249	USP2	rs523604	0.256296	853	0.812961	0.0123047	0.846598	0.998203	NA	0.00377305	0.49633	0.974744	NA	11	118885029	A	G	0.5353	NM_001243759	uc001pwn.5	119381711	-
8000700	RN7SKP127	rs7204270	0.256768	854	0.812961	0.0239234	0.599028	0.99462	NA	-0.0194737	0.650148	0.985816	NA	16	30145642	G	A	0.5265	ENST00000410443	uc059stv.1	29731404	-
8003599	RN7SKP127	rs7204270	0.256768	855	0.812961	0.0239234	0.599028	0.99462	NA	-0.0194737	0.650148	0.985816	NA	16	30145642	G	A	0.5265	ENST00000410443	uc059stv.1	29731404	-
8016382	SP6	rs4239162	0.257066	856	0.812961	0.0138755	0.968326	0.998203	NA	0.000880424	0.29673	0.962732	NA	17	47678444	G	A	0.5059	NM_001258248	uc002img.3	47851193	-
8067802	RGS19	rs2256814	0.257687	857	0.812961	-0.00943675	0.401288	0.968985	NA	-0.010552	0.846949	0.998254	NA	20	63742630	A	G	0.2088	NM_005873	uc002yhy.4	64079492	-
8038441	RNU6-841P	rs2303759	0.258094	858	0.812961	-0.0158435	0.738507	0.99578	NA	0.00922264	0.798386	0.998254	NA	19	49365794	C	A	0.2692	ENST00000383872	uc061bjb.1	49764630	-
8007228	ATP6V0A1	rs2293152	0.258388	859	0.812961	0.0145845	0.737789	0.99578	NA	0.00737028	0.530483	0.974744	NA	17	42329511	C	G	0.6235	NM_001130020	uc002hzs.4	42458879	+
7926916	ZEB1	rs793108	0.258745	860	0.812961	0.0160452	0.745437	0.99578	NA	0.00821502	0.878932	0.999408	NA	10	31126177	A	G	0.4971	NM_001128128	uc057sov.1; uc057sox.1; uc057sow.1; uc057sou.1; uc057sot.1; uc057soi.1; uc009xln.2; uc009xlm.2; uc057sok.1; uc009xll.3; uc057son.1; uc057sos.1; uc057som.1; uc057sop.1; uc057soq.1; uc057sol.1; uc057sor.1; uc057soj.1; uc001ivv.5; uc010qeh.3; uc057soh.1; uc001ivs.5; uc001ivu.5; uc009xlp.4; uc057soo.1	31322009; 31381722; 31355143; 31321689; 31321620; 31318782; 31321473; 31321134; 31318836; 31320605; 31319215; 31321151; 31319212; 31320112; 31320125; 31319211; 31320546; 31318817; 31319211; 31319221; 31318494; 31319124; 31319171; 31321134; 31319215	+
8007263	HSD17B1	rs2293152	0.258893	861	0.812961	-0.0143597	0.572687	0.99462	NA	-0.0122067	0.267154	0.962732	NA	17	42329511	C	G	0.6235	NM_000413	uc002hzw.4	42549213	+
8003217	EMC8	rs35929052	0.259239	862	0.812961	0.0147177	0.155101	0.935905	NA	0.0253409	0.870777	0.999408	NA	16	85960878	G	A	0.8824	NM_001142288	uc010vol.3	85799608	-
7903393	S1PR1	rs7552544	0.259433	863	0.812961	0.0212816	0.747628	0.99578	NA	-0.0102663	0.093794	0.944376	NA	1	100775337	A	G	0.5828	NM_001400	uc001dud.3	101236887	+
7928600	EIF5AL1	rs1782645	0.259592	864	0.812961	0.00811978	0.610132	0.99462	NA	-0.00647231	0.642962	0.985816	NA	10	79288854	A	G	0.4441	NM_001099692	uc009xrx.4	79512600	+
7922408	SNORD78	rs842639	0.259609	865	0.812961	-0.028734	0.744236	0.99578	NA	-0.0152048	0.843906	0.998254	NA	2	60868110	A	G	0.6294	NR_003944	uc061jji.1; uc021vjg.1	57544534; 72760533	+
7964484	B4GALNT1	rs703842	0.259692	866	0.812961	-0.0145259	0.075187	0.908035	NA	-0.0403444	0.0879271	0.944376	NA	12	57768956	A	G	0.6882	NM_001276469	uc001spi.5	57633202	-
7921319	FCRL1	rs3761959	0.260738	867	0.813029	-0.0169288	0.358483	0.968985	NA	-0.0258208	0.312015	0.962732	NA	1	157699488	G	A	0.5559	NM_001159397	uc001fri.4	157820089	-
7952179	H2AFX	rs533646	0.260895	868	0.813029	0.0110608	0.289455	0.951976	NA	0.0187372	0.761286	0.998254	NA	11	118696037	G	C	0.6607	NM_002105	uc001pvg.4	119095467	-
7999419	DEXI	rs6498184	0.261117	869	0.813029	-0.0237842	0.0453766	0.908035	NA	0.0698963	0.649332	0.985816	NA	16	11342133	G	A	0.8235	NM_014015	uc002dal.4	10942460	-
7918923	RNA5SP55	rs6677309	0.261259	870	0.813029	-0.0568912	0.947021	0.998203	NA	-0.0042615	0.176691	0.962732	NA	1	116537544	A	C	0.8728	ENST00000516701	uc021osl.1	116962471	-
7897520	RN7SKP269	rs10492972	0.26191	871	0.813029	0.0241479	0.397441	0.968985	NA	0.0312844	0.60458	0.985816	NA	1	10293054	C	T	0.3006	ENST00000365545	uc057cbr.1	9947317	+
7928600	EIF5AL1	rs1250550	0.262239	872	0.813029	0.00859484	0.521446	0.975333	NA	-0.00803791	0.681189	0.992318	NA	10	79300560	A	C	0.3588	NM_001099692	uc009xrx.4	79512600	+
8110123	FAM153A	rs4075958	0.262862	873	0.813029	0.015383	0.703202	0.995524	NA	0.00900432	0.751782	0.998254	NA	5	177357511	A	G	0.2515	XM_006714843	uc063khq.1; uc063khp.1; uc063khn.1; uc063khr.1; uc063khw.1; uc063kib.1; uc063khs.1; uc063kia.1; uc063kic.1; uc063khx.1; uc063kid.1; uc063khz.1; uc063khy.1; uc063kho.1; uc063kht.1; uc003mic.4; uc063khu.1; uc063kig.1; uc063kih.1; uc063khv.1; uc063kie.1; uc063kif.1; uc010jkp.2	177714152; 177716363; 177717252; 177723156; 177745214; 177750394; 177753206; 177753263; 177753263; 177753275; 177753275; 177753296; 177753297; 177780465; 177780633; 177780676; 177780845; 177781684; 177782813; 177782837; 177782965; 177783364; 177783398	-
7961142	OLR1	rs10466829	0.263267	874	0.813029	0.041665	0.775575	0.99578	NA	0.0181282	0.640155	0.985816	NA	12	9723495	A	G	0.5147	NM_001172632	uc010sha.2	10172132	-
8007388	CNTD1	rs744166	0.263493	875	0.813029	-0.0181146	0.356926	0.968985	NA	-0.0258209	0.0311765	0.907602	NA	17	42362183	G	A	0.3971	NM_173478	uc002ibm.5	42798791	+
8016387	PRR15L	rs4239162	0.263599	876	0.813029	0.0181904	0.504151	0.972686	NA	-0.0190061	0.537338	0.974744	NA	17	47678444	G	A	0.5059	NM_024320	uc002imp.5	47957878	-
7911993	ICMT	rs3007421	0.264067	877	0.813029	0.017576	0.700036	0.995524	NA	0.00727929	0.918328	0.999408	NA	1	6470129	A	G	0.1294	NM_012405	uc001amk.4	6235940	-
8016382	SP6	rs4794058	0.264463	878	0.813029	0.0138694	0.985873	0.999431	NA	0.000401094	0.332417	0.962732	NA	17	47519732	A	G	0.503	NM_001258248	uc002img.3	47851193	-
7993248	RMI2	rs7191700	0.264468	879	0.813029	-0.0124966	0.745854	0.99578	NA	-0.0067382	0.193861	0.962732	NA	16	11312946	C	T	0.6627	NM_152308	uc002daw.2	11345430	+
8137112	ZNF212	rs354033	0.264468	880	0.813029	-0.0123871	0.0471623	0.908035	NA	-0.0372844	0.724433	0.998254	NA	7	149592373	G	A	0.7265	NM_012256	uc003wfp.3	149239650	+
8066619	PLTP	rs4810485	0.264542	881	0.813029	0.0158856	0.698862	0.995524	NA	-0.00923774	0.160659	0.953651	NA	20	46119308	A	C	0.2706	NM_001242921	uc002xql.3	45910937	-
8129872	OLIG3	rs13192841	0.265029	882	0.813029	-0.0194758	0.844162	0.998203	NA	-0.00563956	0.135059	0.948564	NA	6	137646077	A	G	0.2353	NM_175747	uc003qhp.2	137494250	-
7908397	RGS13	rs2760524	0.265111	883	0.813029	-0.0248721	0.968665	0.998203	NA	-0.00125598	0.138726	0.948749	NA	1	192561418	G	A	0.8412	NM_002927	uc001gsj.4	192636144	+
7908397	RGS13	rs1323292	0.265111	884	0.813029	-0.0248721	0.968665	0.998203	NA	-0.00125598	0.138726	0.948749	NA	1	192571891	A	G	0.8412	NM_002927	uc001gsj.4	192636144	+
8138776	HIBADH	rs917116	0.265599	885	0.813603	0.0130268	0.743863	0.99578	NA	-0.00671561	0.255809	0.962732	NA	7	28133120	C	A	0.2529	NM_152740	uc003szf.4	27662995	-
7999433	NA	rs4780346	0.266289	886	0.814795	-0.0174612	0.552751	0.989768	NA	0.0146595	0.375381	0.970201	NA	16	11194949	A	G	0.2618	NA	uc059qus.1	11274236	-
8115997	RAB24	rs4976646	0.266918	887	0.815201	0.0140749	0.722969	0.99578	NA	-0.00806656	0.821999	0.998254	NA	5	177361569	G	A	0.3095	NM_001031677	uc003mfw.5	177303708	-
8116020	LMAN2	rs4976646	0.267023	888	0.815201	0.00715049	0.13701	0.934639	NA	-0.0181222	0.247126	0.962732	NA	5	177361569	G	A	0.3095	NM_006816	uc003mge.4	177351852	-
8006968	GSDMA	rs12946510	0.268721	889	0.81779	0.015482	0.05835	0.908035	NA	-0.044695	0.540504	0.974744	NA	17	39756124	A	G	0.4912	NM_178171	uc002htl.1	39962972	+
8007363	WNK4	rs2293152	0.268984	890	0.81779	-0.0156014	0.355573	0.968985	NA	-0.0216919	0.820086	0.998254	NA	17	42329511	C	G	0.6235	NM_032387	uc002ibj.4	42780677	+
8027002	GDF15	rs874628	0.269208	891	0.81779	0.014927	0.262939	0.951976	NA	0.028281	0.834444	0.998254	NA	19	18193890	A	G	0.7	NM_004864	uc002niv.2	18386157	+
8040576	RNU6-936P	rs4665719	0.269225	892	0.81779	0.0301913	0.129335	0.932519	NA	-0.0743392	0.230221	0.962732	NA	2	24794991	G	A	0.2412	ENST00000384005	uc061hdd.1	24676308	+
7964460	DDIT3	rs703842	0.269463	893	0.81779	0.0185767	0.00210225	0.56992	NA	-0.0866317	0.183707	0.962732	NA	12	57768956	A	G	0.6882	NM_001195053	uc021qzj.2; uc009zpt.4; uc058pxu.1; uc001soi.4; uc058pxv.1; uc009zps.4; uc058pxw.1	57520492; 57520517; 57517743; 57520517; 57520511; 57520511; 57520511	-
8154359	RPL18A	rs874628	0.269681	894	0.81779	-0.00866623	0.975668	0.999028	NA	-0.000505558	0.275596	0.962732	NA	19	18193890	A	G	0.7	AY779046	uc002nhp.4; uc060vnh.1; uc060vni.1; uc060vnj.1; uc060vnk.1; uc060vnl.1; uc060vnm.1	17859875; 17859920; 17859931; 17859952; 17860124; 17860762; 17861332	+
7967456	RILPL2	rs1790100	0.270229	895	0.818538	-0.0123143	0.149628	0.935905	NA	0.0263566	0.595543	0.985063	NA	12	123172178	G	T	0.2324	NM_145058	uc001uey.2	123436717	-
8129861	IFNGR1	rs13192841	0.271327	896	0.820278	-0.0130205	0.0343854	0.908035	NA	0.0434467	0.390663	0.974744	NA	6	137646077	A	G	0.2353	NM_000416	uc003qho.3	137219449	-
7982185	DEXI	rs4780346	0.27212	897	0.820278	-0.0249588	0.943736	0.998203	NA	-0.00246914	0.523319	0.974744	NA	16	11194949	A	G	0.2618	NM_014015	uc002dal.4	10942460	-
7986685	DEXI	rs4780346	0.27212	898	0.820278	-0.0249588	0.943736	0.998203	NA	-0.00246914	0.523319	0.974744	NA	16	11194949	A	G	0.2618	NM_014015	uc002dal.4	10942460	-
7911989	RPL22	rs3007421	0.272122	899	0.820278	-0.0304485	0.409052	0.968985	NA	0.0312692	0.447718	0.974744	NA	1	6470129	A	G	0.1294	NM_000983	uc001amd.4	6199612	-
8016412	RNU6-1201P	rs4239162	0.272317	900	0.820278	0.0251239	0.678754	0.99462	NA	-0.0163071	0.20171	0.962732	NA	17	47678444	G	A	0.5059	ENST00000384227	uc060guj.1	48088784	-
8067754	C20orf181	rs2256814	0.273091	901	0.820935	-0.0139277	0.623307	0.99462	NA	0.0100765	0.921263	0.999408	NA	20	63742630	A	G	0.2088	XR_109593	uc061ypy.1	63843915	-
8008052	SP2	rs4794058	0.273388	902	0.820935	0.0121861	0.132634	0.934639	NA	0.0310216	0.34098	0.962732	NA	17	47519732	A	G	0.503	BC016680	uc060grc.1; uc002imk.3	47896149; 47896149	+
8030366	SNORD35A	rs8107548	0.273669	903	0.820935	-0.0359767	0.946657	0.998203	NA	-0.00423793	0.813201	0.998254	NA	19	49367386	G	A	0.2647	NR_000018	uc010enb.1	49491174	+
7921332	CD5L	rs2050568	0.273746	904	0.820935	-0.0115919	0.710343	0.995524	NA	0.00687825	0.0702949	0.944376	NA	1	157800451	G	A	0.5325	NM_005894	uc001frk.5	157841798	-
8177130	SLC9B1	rs7665090	0.274388	905	0.82195	0.0327643	0.762027	0.99578	NA	0.017711	0.366454	0.970201	NA	4	102630446	G	A	0.5235	NM_001100874	uc003hwu.4	103019719	-
7959597	TMED2	rs1790100	0.274773	906	0.822197	0.00821103	0.549515	0.988938	NA	0.00710752	0.46102	0.974744	NA	12	123172178	G	T	0.2324	NM_006815	uc001ufg.4	123584530	+
8129880	PERP	rs67297943	0.275969	907	0.823364	0.0175904	0.990947	0.999431	NA	0.000259521	0.2832	0.962732	NA	6	137923679	A	G	0.8118	NM_022121	uc003qht.3	138107511	-
7947947	AGBL2	rs7120737	0.275991	908	0.823364	0.0227428	0.133604	0.934639	NA	-0.0370768	0.898515	0.999408	NA	11	47680843	G	A	0.1324	NM_024783	uc001ngg.4	47715360	-
7993185	NUBP1	rs7200786	0.276074	909	0.823364	0.00885204	0.661732	0.99462	NA	0.00659263	0.201855	0.962732	NA	16	11083944	A	G	0.4941	NM_001278506	uc002dab.3	10743854	+
8025601	ICAM1	rs2288904	0.276939	910	0.823543	0.0217189	0.642071	0.99462	NA	0.0133741	0.0774004	0.944376	NA	19	10631494	G	A	0.7882	NM_000201	uc002mnq.3	10270834	+
7991877	CAPN15	rs2744148	0.277202	911	0.823543	-0.00913143	0.414098	0.968985	NA	0.0103236	0.119027	0.944376	NA	16	1023552	G	A	0.1559	NM_005632	uc002chi.3	527855	+
7956539	DTX3	rs12368653	0.277257	912	0.823543	0.0126536	0.627684	0.99462	NA	0.0101854	0.884265	0.999408	NA	12	57739473	A	G	0.4765	NM_001286245	uc001sox.3	57604833	+
8025103	EMR1	rs1077667	0.27735	913	0.823543	0.0438612	0.393228	0.968985	NA	0.0497212	0.665349	0.987612	NA	19	6668961	G	A	0.7941	NM_001256252	uc010dvb.5	6887578	+
8078310	RNU1-96P	rs11129295	0.277759	914	0.823856	0.0258464	0.0702345	0.908035	NA	-0.0705112	0.314025	0.962732	NA	3	27747289	A	G	0.3853	ENST00000364163	uc062hqv.1	27513870	+
7923231	RNU6-704P	rs12122721	0.278285	915	0.824012	-0.0253989	0.621646	0.99462	NA	-0.0194106	0.780418	0.998254	NA	1	201015352	G	A	0.7029	ENST00000364162	uc057oge.1	200933447	-
7911902	NPHP4	rs3007421	0.278571	916	0.824012	0.0142311	0.207882	0.942254	NA	-0.0210221	0.976604	0.999408	NA	1	6470129	A	G	0.1294	NM_001291593	uc057bsc.1; uc001alr.2; uc057bsd.1; uc057bse.1; uc001alq.3; uc057bsf.1; uc057bsg.1; uc057bsh.1; uc057bsi.1; uc057bsj.1; uc057bsk.1	5867652; 5868375; 5992424; 5992473; 5992471; 5992447; 5873841; 5877466; 5882849; 5992473; 5905324	-
7947881	RAPSN	rs7120737	0.278836	917	0.824012	0.0165824	0.0105596	0.908035	NA	-0.0479388	0.0598602	0.944376	NA	11	47680843	G	A	0.1324	NM_005055	uc001nfi.2	47449178	-
7931873	GDI2	rs2104286	0.279027	918	0.824012	0.0103341	0.713709	0.995524	NA	0.00518504	0.698504	0.998254	NA	10	6057082	A	G	0.7618	NM_001115156	uc001iim.5	5813411	-
8076511	RPL5	rs11810217	0.279723	919	0.824967	0.0101882	0.423758	0.968985	NA	0.0115664	0.272989	0.962732	NA	1	92682820	A	G	0.2706	NM_000969	uc001doz.4	92832024	+
8033892	ANGPTL6	rs8112449	0.279959	920	0.824967	-0.0120301	0.607478	0.99462	NA	-0.0102122	0.719669	0.998254	NA	19	10409388	G	A	0.6353	NM_031917	uc002mmy.2	10102796	-
7911730	PANK4	rs3748817	0.280441	921	0.825488	0.0102521	0.759919	0.99578	NA	0.00506721	0.0805826	0.944376	NA	1	2594226	A	G	0.6559	NM_018216	uc001ajm.3	2526628	-
7908421	TROVE2	rs1359062	0.28143	922	0.8275	-0.0147238	0.73358	0.99578	NA	-0.00646114	0.190573	0.962732	NA	1	192572342	C	G	0.8353	NM_001042369	uc001gsw.4	193060056	+
7903369	SLC30A7	rs11581062	0.282604	923	0.829381	0.00995508	0.21574	0.942254	NA	0.0180933	0.254732	0.962732	NA	1	100941963	G	A	0.2853	NM_001144884	uc001dtn.3; uc001dto.3; uc057ird.1	100896075; 100896253; 100961827	+
7923347	LAD1	rs7522462	0.28291	924	0.829381	0.0148856	0.818361	0.998203	NA	-0.005191	0.160971	0.953651	NA	1	200912467	G	A	0.7176	NM_005558	uc001gwm.4	201399608	-
8025672	SLC44A2	rs2288904	0.283003	925	0.829381	0.0219299	0.85861	0.998203	NA	-0.00514889	0.967202	0.999408	NA	19	10631494	G	A	0.7882	ENST00000586078	uc002mpg.2	10625524	+
7908639	C1orf106	rs55838263	0.283647	926	0.829381	0.0151505	0.98928	0.999431	NA	-0.000306867	0.631993	0.985816	NA	1	200905600	A	G	0.7118	NM_001142569	uc010ppm.3	200894820	+
7918913	IGSF3	rs6677309	0.284002	927	0.829381	-0.01958	0.0661986	0.908035	NA	0.0460863	0.141851	0.949525	NA	1	116537544	A	C	0.8728	NM_001007237	uc001egr.3	116667753	-
8138741	HOXA6	rs706015	0.284034	928	0.829381	0.0208761	0.97172	0.998203	NA	-0.00104587	0.996132	0.999691	NA	7	26975369	C	A	0.1824	NM_024014	uc003syo.3	27147774	-
8089999	KPNA1	rs2255214	0.284211	929	0.829381	-0.0084598	0.435469	0.968985	NA	-0.0119532	0.729158	0.998254	NA	3	122051692	C	A	0.5147	NM_002264	uc003efe.3	122514928	-
8066921	KCNB1	rs17785991	0.285039	930	0.830399	0.0140543	0.45833	0.968985	NA	0.0176606	0.155747	0.952715	NA	20	49822224	A	T	0.3265	NM_004975	uc002xur.3	49482676	-
8050719	ITSN2	rs4665719	0.285324	931	0.830399	0.00847043	0.751228	0.99578	NA	-0.0045927	0.71016	0.998254	NA	2	24794991	G	A	0.2412	NM_147152	uc002rfg.4	24360508	-
8137151	SSPO	rs354033	0.285478	932	0.830399	0.00696515	0.924307	0.998203	NA	-0.001215	0.550551	0.974744	NA	7	149592373	G	A	0.7265	ENST00000475488	uc064jay.1	149786219	+
8132343	NA	rs60600003	0.285803	933	0.830453	0.0371754	0.857648	0.998203	NA	-0.00622673	0.724179	0.998254	NA	7	37342861	C	A	0.07738	NA	uc064cwo.1	37419627	+
8038382	PIH1D1	rs2303759	0.286512	934	0.831196	-0.0099404	0.615013	0.99462	NA	0.00948814	0.490726	0.974744	NA	19	49365794	C	A	0.2692	NM_017916	uc002pns.3	49451810	-
7897288	ESPN	rs3007421	0.286672	935	0.831196	-0.0181855	0.651273	0.99462	NA	0.0103209	0.800758	0.998254	NA	1	6470129	A	G	0.1294	NM_031475	uc001amy.3	6424787	+
7964413	R3HDM2	rs201202118	0.287434	936	0.831789	0.00873044	0.642203	0.99462	NA	0.00681391	0.0423515	0.944376	NA	12	57788279	A	T	0.6964	NM_014925	uc009zpm.1	57310463	-
8007355	VPS25	rs744166	0.28749	937	0.831789	-0.00957985	0.773274	0.99578	NA	-0.00476006	0.30203	0.962732	NA	17	42362183	G	A	0.3971	NM_032353	uc002ibi.5	42773435	+
8051820	THADA	rs12466022	0.288257	938	0.833119	-0.0119443	0.850407	0.998203	NA	0.00314788	0.201214	0.962732	NA	2	43131922	C	A	0.7147	NM_001083953	uc002rsw.5	43595974	-
8116033	F12	rs4976646	0.289459	939	0.835701	-0.0102938	0.0793512	0.908035	NA	-0.0313155	0.63404	0.985816	NA	5	177361569	G	A	0.3095	NM_000505	uc003mgo.5	177409576	-
8035465	ISYNA1	rs874628	0.289857	940	0.835916	0.0128047	0.72173	0.99578	NA	-0.00819873	0.677739	0.991086	NA	19	18193890	A	G	0.7	NM_001170938	uc002nje.3	18438167	-
8030366	SNORD35A	rs2303759	0.29015	941	0.835916	-0.0339386	0.970617	0.998203	NA	-0.00230593	0.931143	0.999408	NA	19	49365794	C	A	0.2692	NR_000018	uc010enb.1	49491174	+
8066609	SPATA25	rs2425752	0.292146	942	0.840461	0.0126474	0.816033	0.998203	NA	-0.00526609	0.770621	0.998254	NA	20	46073481	A	G	0.2853	NM_080608	uc002xqf.4	45887635	-
8063028	DNTTIP1	rs2425752	0.292348	943	0.840461	-0.010672	0.365168	0.968985	NA	0.0173291	0.230245	0.962732	NA	20	46073481	A	G	0.2853	NM_052951	uc002xpk.3	45791936	+
8038382	PIH1D1	rs8107548	0.292914	944	0.840933	-0.0101302	0.616075	0.99462	NA	0.00941621	0.461601	0.974744	NA	19	49367386	G	A	0.2647	NM_017916	uc002pns.3	49451810	-
8025826	RN7SL192P	rs2288904	0.293132	945	0.840933	-0.0190505	0.68264	0.994659	NA	-0.0101706	0.156325	0.952715	NA	19	10631494	G	A	0.7882	ENST00000584303	uc060tny.1	11011707	+
7959597	TMED2	rs7132277	0.293939	946	0.841815	0.00789772	0.600851	0.99462	NA	0.00627489	0.547846	0.974744	NA	12	123108835	A	G	0.1941	NM_006815	uc001ufg.4	123584530	+
7956522	KIF5A	rs703842	0.294061	947	0.841815	-0.0180846	0.944426	0.998203	NA	-0.00228174	0.0151744	0.907602	NA	12	57768956	A	G	0.6882	ENST00000455537	uc001sor.2	57549997	+
8000757	DOC2A	rs7204270	0.294875	948	0.843256	0.0113733	0.525325	0.975333	NA	-0.0117822	0.128386	0.944376	NA	16	30145642	G	A	0.5265	NM_001282063	uc002dvo.4	30011421	-
7961091	CLEC2A	rs11052877	0.29525	949	0.843439	0.0173764	0.967818	0.998203	NA	-0.00117982	0.984635	0.999408	NA	12	9753094	G	A	0.3882	NM_207375	uc009zhb.3	9932347	-
7999468	LITAF	rs4780346	0.296704	950	0.846699	-0.0581331	0.323745	0.968985	NA	-0.0810794	0.0196739	0.907602	NA	16	11194949	A	G	0.2618	NM_001136472	uc002dbb.4	11586950	-
8027002	GDF15	rs11554159	0.298836	951	0.846952	0.0147733	0.285678	0.951976	NA	0.0270187	0.972128	0.999408	NA	19	18175134	G	A	0.7235	NM_004864	uc002niv.2	18386157	+
8073962	MOV10L1	rs470119	0.298899	952	0.846952	0.016528	0.765534	0.99578	NA	0.00751853	0.663143	0.987249	NA	22	50528485	A	G	0.3882	NM_001164104	uc003bjk.5	50090064	+
8105077	CARD6	rs6880778	0.298978	953	0.846952	-0.0145957	0.180247	0.942254	NA	0.0389347	0.235716	0.962732	NA	5	40398994	G	A	0.5412	NM_032587	uc003jmg.4	40841183	+
8067792	SAMD10	rs2256814	0.299593	954	0.846952	0.0115023	0.29274	0.956166	NA	0.0196596	0.617206	0.985816	NA	20	63742630	A	G	0.2088	NM_080621	uc002yhm.2	63979642	-
8067812	LKAAEAR1	rs2256814	0.300411	955	0.846952	0.0124643	0.819897	0.998203	NA	0.00435925	0.158818	0.953651	NA	20	63742630	A	G	0.2088	NM_001007125	uc002yie.1	64084359	-
7919088	ADAM30	rs666930	0.300643	956	0.846952	-0.0170371	0.728468	0.99578	NA	0.0102307	0.307372	0.962732	NA	1	119716347	G	A	0.5588	NM_021794	uc001eij.4	119896495	-
7911796	LINC00982	rs4648356	0.301469	957	0.846952	-0.0124889	0.364876	0.968985	NA	-0.016572	0.404256	0.974744	NA	1	2792599	C	A	0.6716	NR_015440	uc057bov.1; uc001aka.4; uc057bow.1; uc057box.1; uc057boy.1; uc057boz.1; uc010nzg.2	3062531; 3063786; 3061751; 3062032; 3068437; 3063682; 3067769	-
8064245	TCEA2	rs6062314	0.301672	958	0.846952	0.0174201	0.524256	0.975333	NA	0.0117084	0.493334	0.974744	NA	20	63778360	A	G	0.91471	NM_003195	uc061yqu.1	64063143	+
8110382	PRR7	rs4976646	0.301947	959	0.846952	0.00971888	0.199806	0.942254	NA	0.0235227	0.796967	0.998254	NA	5	177361569	G	A	0.3095	NM_001174101	uc003mgv.3	177446826	+
8115957	HK3	rs4976646	0.302198	960	0.846952	0.0114444	0.710259	0.995524	NA	-0.00708533	0.0534905	0.944376	NA	5	177361569	G	A	0.3095	NM_002115	uc003mfa.4	176899332	-
7911720	PEX10	rs4648356	0.302477	961	0.846952	0.0136806	0.332056	0.968985	NA	-0.0214006	0.300046	0.962732	NA	1	2792599	C	A	0.6716	NM_002617	uc001ajh.4	2412571	-
7975772	ZC2HC1C	rs4903324	0.302759	962	0.846952	-0.0188597	0.561513	0.99462	NA	0.0146494	0.959898	0.999408	NA	14	75495168	A	G	0.2088	NM_024643	uc001xrh.5	75069279	+
8051793	OXER1	rs6718520	0.302792	963	0.846952	0.016057	0.682984	0.994659	NA	0.0103314	0.47851	0.974744	NA	2	43098432	A	G	0.4412	NM_148962	uc002rss.4	42764261	-
8052703	WDR92	rs7595717	0.30297	964	0.846952	0.0143334	0.530046	0.975333	NA	-0.0147598	0.0346917	0.93286	NA	2	68360345	A	G	0.2647	NM_001256476	uc002sef.3	68157482	-
8033987	ICAM3	rs34536443	0.303016	965	0.846952	0.0431977	0.0159226	0.908035	NA	-0.0594607	0.420911	0.974744	NA	19	10352442	C	G	0.97041	NM_002162	uc002mob.3	10339823	-
8089970	ILDR1	rs1920296	0.303474	966	0.846952	-0.0121658	0.754948	0.99578	NA	0.00638694	0.25477	0.962732	NA	3	121824730	C	A	0.6088	NM_001199799	uc003ees.4	122022204	-
8007188	CNP	rs2293152	0.304663	967	0.846952	-0.0112455	0.756017	0.99578	NA	0.00578651	0.181489	0.962732	NA	17	42329511	C	G	0.6235	NM_033133	uc002hyl.2	41966740	+
7939805	SLC39A13	rs7120737	0.304959	968	0.846952	0.0155544	0.748038	0.99578	NA	-0.00611583	0.0688599	0.944376	NA	11	47680843	G	A	0.1324	NM_001128225	uc009ylq.4	47408628	+
7918034	DPH5	rs11581062	0.305098	969	0.846952	0.0164789	0.118076	0.929176	NA	-0.0367386	0.485444	0.974744	NA	1	100941963	G	A	0.2853	NM_001077394	uc001dtw.4; uc057ire.1; uc001dts.4; uc001dtz.4; uc057irf.1; uc057irg.1; uc057irh.1; uc057iri.1; uc001dtr.4; uc057irj.1; uc057irk.1; uc057irl.1; uc001dtt.4; uc057irm.1; uc057iro.1; uc057irp.1	101025762; 101021720; 101025772; 101026088; 100995150; 101025351; 101025775; 101025815; 101025763; 101025771; 101025761; 101025755; 101025767; 101025815; 101025753; 101025787	-
8063382	SNAI1	rs17785991	0.305412	970	0.846952	-0.0215608	0.324999	0.968985	NA	0.0369847	0.484768	0.974744	NA	20	49822224	A	T	0.3265	NM_005985	uc002xuz.4	49982998	+
7931899	IL15RA	rs62626317	0.305469	971	0.846952	0.0176951	0.759883	0.99578	NA	-0.00688901	0.238499	0.962732	NA	10	6068962	A	G	0.8324	NM_001243539	uc001iiw.4	5978187	-
7931914	IL2RA	rs62626317	0.306373	972	0.846952	0.0208725	0.247702	0.951976	NA	0.030214	0.854903	0.999383	NA	10	6068962	A	G	0.8324	NM_000417	uc001iiz.3	6062325	-
7998407	C1QTNF8	rs2744148	0.306568	973	0.846952	-0.0172303	0.381157	0.968985	NA	0.0199987	0.635994	0.985816	NA	16	1023552	G	A	0.1559	NM_207419	uc010uuw.2	1096244	-
7940473	TMEM138	rs650258	0.306659	974	0.846952	0.00948262	0.748312	0.99578	NA	0.00577034	0.902883	0.999408	NA	11	61064810	G	A	0.65	NM_016464	uc001nrl.3	61362000	+
7923332	TNNT2	rs55838263	0.306998	975	0.846952	0.0149483	0.268132	0.951976	NA	-0.0261127	0.982251	0.999408	NA	1	200905600	A	G	0.7118	NM_000364	uc057ohb.1; uc009wzp.5; uc057ohc.1; uc001gwg.5; uc057ohd.1; uc057ohe.1; uc057ohf.1; uc057ohg.1; uc057ohh.1; uc057ohi.1; uc057ohj.1; uc001gwi.5; uc057ohk.1; uc057ohl.1; uc009wzs.2; uc057ohm.1; uc057ohn.1; uc057oho.1; uc057ohp.1; uc057ohq.1; uc057ohr.1; uc057ohs.1; uc057oht.1; uc057ohu.1; uc057ohv.1	201363350; 201364188; 201377661; 201377680; 201377680; 201373254; 201373254; 201373254; 201377700; 201373266; 201377664; 201377661; 201377762; 201377664; 201366966; 201361357; 201373315; 201377633; 201367808; 201377652; 201377664; 201368314; 201373265; 201375368; 201377680	-
8078319	ZCWPW2	rs669607	0.307354	976	0.846952	-0.0155455	0.937206	0.998203	NA	0.00230018	0.830584	0.998254	NA	3	28029953	C	A	0.5294	NM_001040432	uc003ceh.4	28349148	+
8078319	ZCWPW2	rs1813375	0.307354	977	0.846952	-0.0155455	0.937206	0.998203	NA	0.00230018	0.830584	0.998254	NA	3	28037080	A	C	0.5294	NM_001040432	uc003ceh.4	28349148	+
8078319	ZCWPW2	rs170934	0.307354	978	0.846952	-0.0155455	0.937206	0.998203	NA	0.00230018	0.830584	0.998254	NA	3	28037594	T	C	0.5294	NM_001040432	uc003ceh.4	28349148	+
8078448	RN7SL296P	rs28723576	0.308344	979	0.846952	-0.0238639	0.501514	0.972686	NA	0.0267746	0.158757	0.953651	NA	3	32936460	A	G	0.5414	ENST00000585237	uc062hwp.1	33103007	+
8143759	ATP6V0E2-AS1	rs354033	0.308346	980	0.846952	-0.0163212	0.973857	0.998662	NA	0.000842058	0.103237	0.944376	NA	7	149592373	G	A	0.7265	NR_027040	uc003wgn.5	149873845	-
7956551	ARHGEF25	rs12368653	0.308877	981	0.846952	-0.012707	0.0558732	0.908035	NA	0.0451834	0.684678	0.994195	NA	12	57739473	A	G	0.4765	NM_001111270	uc009zpy.5	57610179	+
7931873	GDI2	rs3118470	0.308937	982	0.846952	0.00860407	0.614899	0.99462	NA	0.0072292	0.937357	0.999408	NA	10	6059750	G	A	0.3294	NM_001115156	uc001iim.5	5813411	-
8008834	CLTC	rs180515	0.309367	983	0.846952	0.00717764	0.0796451	0.908035	NA	0.0253388	0.838359	0.998254	NA	17	59946914	G	A	0.35	NM_001288653	uc002ixr.1	59619688	+
8104321	ADAMTS16	rs1393122	0.309677	984	0.846952	-0.0152597	0.50229	0.972686	NA	0.0146627	0.0469459	0.944376	NA	5	4725035	A	G	0.8235	NM_139056	uc003jdl.4	5140329	+
8035193	SMIM7	rs1870071	0.309744	985	0.846952	0.0122783	0.259713	0.951976	NA	0.0233896	0.327248	0.962732	NA	19	16394295	G	A	0.2882	NM_024104	uc002ner.4	16660157	-
8033899	EIF3G	rs34536443	0.309904	986	0.846952	-0.0194167	0.702313	0.995524	NA	0.00477952	0.981745	0.999408	NA	19	10352442	C	G	0.97041	NM_003755	uc002mnd.4	10119902	-
7964535	CYP27B1	rs12368653	0.310469	987	0.846952	0.0111361	0.969464	0.998203	NA	0.000724856	0.370756	0.970201	NA	12	57739473	A	G	0.4765	NM_000785	uc001spz.2	57767251	-
8137101	ZNF282	rs354033	0.310927	988	0.846952	0.00807661	0.942948	0.998203	NA	0.00102705	0.750289	0.998254	NA	7	149592373	G	A	0.7265	NM_003575	uc033apc.1	149195484	+
8007397	PSME3	rs744166	0.311035	989	0.846952	-0.00781719	0.938746	0.998203	NA	-0.000941131	0.0270042	0.907602	NA	17	42362183	G	A	0.3971	NM_001267045	uc002ibs.5	42833417	+
7998280	WDR24	rs2744148	0.311094	990	0.846952	-0.0114047	0.822199	0.998203	NA	0.00376952	0.544793	0.974744	NA	16	1023552	G	A	0.1559	NM_032259	uc002ciz.2	690400	-
8110362	GRK6	rs4075958	0.311237	991	0.846952	-0.00767334	0.972891	0.998299	NA	0.000439911	0.288915	0.962732	NA	5	177357511	A	G	0.2515	NM_001004105	uc003mgq.3	177426842	+
8000706	CDIPT	rs7204270	0.311515	992	0.846952	0.00963111	0.808612	0.998203	NA	-0.00403349	0.401457	0.974744	NA	16	30145642	G	A	0.5265	NM_001286585	uc002dun.5	29863204	-
7992271	TELO2	rs2744148	0.311676	993	0.846952	0.0115223	0.402336	0.968985	NA	-0.0139236	0.696425	0.99789	NA	16	1023552	G	A	0.1559	NM_016111	uc002cly.4	1493362	+
8038347	TEAD2	rs2303759	0.311715	994	0.846952	0.00952743	0.447875	0.968985	NA	-0.0141498	0.756619	0.998254	NA	19	49365794	C	A	0.2692	NM_001256658	uc002pnh.5; uc031rls.2; uc002pni.5; uc002pnj.5; uc002png.5; uc010yao.4; uc061bbi.1; uc061bbj.1; uc061bbk.1; uc061bbm.1	49361495; 49362382; 49362407; 49362457; 49360438; 49362441; 49357255; 49357256; 49362441; 49359857	-
7991898	NHLRC4	rs2744148	0.312038	995	0.846952	0.0163596	0.863425	0.998203	NA	-0.0038818	0.657095	0.985816	NA	16	1023552	G	A	0.1559	NM_176677	uc021szs.3	566995	+
7904396	HAO2	rs666930	0.312097	996	0.846952	0.0130571	0.358769	0.968985	NA	-0.0221866	0.0782692	0.944376	NA	1	119716347	G	A	0.5588	NM_001005783	uc057jvh.1	119368808	+
7908639	C1orf106	rs7522462	0.312246	997	0.846952	0.0140022	0.997086	0.999681	NA	8.27597e-05	0.692553	0.994971	NA	1	200912467	G	A	0.7176	NM_001142569	uc010ppm.3	200894820	+
8063011	WFDC10A	rs4810485	0.312284	998	0.846952	0.0173348	0.478714	0.968985	NA	-0.0204255	0.880235	0.999408	NA	20	46119308	A	C	0.2706	NM_080753	uc002xoz.4	45629525	+
8025728	QTRT1	rs8112449	0.312318	999	0.846952	-0.0103266	0.154814	0.935905	NA	0.0265491	0.646169	0.985816	NA	19	10409388	G	A	0.6353	NM_031209	uc002mpr.4	10701450	+
8130528	RSPH3	rs212405	0.312898	1000	0.846952	0.0140488	0.653541	0.99462	NA	-0.0104506	0.288527	0.962732	NA	6	159049527	T	A	0.6824	NM_031924	uc063soj.1	159000166	-
8080958	GPR27	rs9828629	0.313098	1001	0.846952	-0.0150894	0.251228	0.951976	NA	-0.0320795	0.928356	0.999408	NA	3	71481195	G	A	0.6676	NM_018971	uc011bge.3	71754049	+
7990755	RNU6-415P	rs59772922	0.313616	1002	0.846952	-0.0273106	0.849693	0.998203	NA	0.00778576	0.718956	0.998254	NA	15	78915124	A	G	0.8441	ENST00000516252	uc059mgh.1	78898936	-
8033257	C3	rs1077667	0.313773	1003	0.846952	-0.0277387	0.351896	0.968985	NA	0.0410669	0.023057	0.907602	NA	19	6668961	G	A	0.7941	NM_000064	uc002mfm.4	6720682	-
8148317	MYC	rs4410871	0.31398	1004	0.846952	0.0147356	0.0129945	0.908035	NA	0.0640012	0.220283	0.962732	NA	8	127802783	G	A	0.6794	NM_002467	uc064qdk.2	127736068	+
7917431	RNA5SP51	rs11587876	0.314515	1005	0.846952	-0.0230037	0.147055	0.935905	NA	-0.0527888	0.210894	0.962732	NA	1	85449500	A	G	0.7618	ENST00000364750	uc057iav.1	85883798	-
7912283	CTNNBIP1	rs10492972	0.314762	1006	0.846952	-0.0119019	0.200912	0.942254	NA	-0.0242244	0.65846	0.985816	NA	1	10293054	C	T	0.3006	NM_020248	uc001aqk.2	9910263	-
8115957	HK3	rs4075958	0.314856	1007	0.846952	0.0113486	0.854485	0.998203	NA	-0.00352129	0.23272	0.962732	NA	5	177357511	A	G	0.2515	NM_002115	uc003mfa.4	176899332	-
7904303	CD101	rs6677309	0.314912	1008	0.846952	-0.0635439	0.767722	0.99578	NA	-0.0228869	0.498585	0.974744	NA	1	116537544	A	C	0.8728	NM_001256106	uc057jsu.1; uc010oxc.3; uc057jsx.1; uc057jsy.1	117001749; 117001811; 117032943; 117034046	+
7996891	CIRH1A	rs1886700	0.315553	1009	0.847548	0.0126449	0.102905	0.929176	NA	0.0284154	0.924752	0.999408	NA	16	68652002	A	G	0.1382	NM_032830	uc002ews.5	69132514	+
8089928	RNU4-62P	rs1920296	0.315809	1010	0.847548	0.0180927	0.149094	0.935905	NA	0.0427681	0.741073	0.998254	NA	3	121824730	C	A	0.6088	ENST00000410125	uc062myl.1	121655604	-
7994609	QPRT	rs7204270	0.316138	1011	0.847548	0.0119258	0.672611	0.99462	NA	0.00865208	0.222841	0.962732	NA	16	30145642	G	A	0.5265	NM_014298	uc002dto.4	29679036	+
7960575	NOP2	rs12296430	0.316728	1012	0.847548	0.0096879	0.464788	0.968985	NA	0.0118912	0.49967	0.974744	NA	12	6394334	C	G	0.2235	NM_001033714	uc058kgu.1	6568286	-
8030251	TRPM4	rs8107548	0.317004	1013	0.847548	-0.0138687	0.789268	0.996634	NA	0.00679597	0.556472	0.976014	NA	19	49367386	G	A	0.2647	NM_017636	uc002pmw.4	49157740	+
8064059	COL20A1	rs6062314	0.31701	1014	0.847548	0.016484	0.791639	0.996635	NA	0.00484084	0.742308	0.998254	NA	20	63778360	A	G	0.91471	NM_020882	uc011aau.2	63293185	+
8063026	RNU6ATAC38P	rs2425752	0.317396	1015	0.847744	0.0146069	0.708676	0.995524	NA	0.00964351	0.452538	0.974744	NA	20	46073481	A	G	0.2853	ENST00000408119	uc021wel.1	45778697	+
8025551	C19orf66	rs8112449	0.317892	1016	0.848099	0.0103142	0.585323	0.99462	NA	0.0100996	0.24648	0.962732	NA	19	10409388	G	A	0.6353	NM_018381	uc002mmu.5	10086129	+
7961111	CLEC1A	rs11052877	0.31863	1017	0.848099	0.0173681	0.592909	0.99462	NA	-0.0155215	0.0874107	0.944376	NA	12	9753094	G	A	0.3882	NM_016511	uc001qxb.4	10098985	-
8008870	VMP1	rs8070345	0.318791	1018	0.848099	-0.00706392	0.678072	0.99462	NA	0.0059015	0.509979	0.974744	NA	17	59739396	A	G	0.5059	NM_030938	uc002ixu.5	59707464	+
8090018	PARP9	rs9282641	0.3188	1019	0.848099	-0.026713	0.193799	0.942254	NA	0.038226	0.65082	0.985816	NA	3	122077921	G	A	0.9	NM_001146102	uc003efi.5; uc003efg.5; uc003efh.5; uc062nan.1; uc011bjs.4; uc003efj.3; uc062nao.1	122564577; 122564253; 122564577; 122546003; 122564242; 122564315; 122564242	-
7960689	MLF2	rs12296430	0.3194	1020	0.848099	-0.00816194	0.0887464	0.917704	NA	-0.021478	0.695991	0.997796	NA	12	6394334	C	G	0.2235	NM_005439	uc010sfi.3	6752916	-
8123104	FNDC1	rs1738074	0.320139	1021	0.848099	-0.00808903	0.581518	0.99462	NA	0.00919631	0.366076	0.970201	NA	6	159044945	G	A	0.6147	NM_032532	uc010kjv.4	159169396	+
8083709	SMC4	rs4680534	0.320179	1022	0.848099	0.0103309	0.669737	0.99462	NA	-0.00748701	0.834121	0.998254	NA	3	159981157	C	T	0.3882	NM_001002800	uc003fdh.5	160399303	+
8033352	MBD3L2	rs1077667	0.320477	1023	0.848099	-0.0134223	0.961755	0.998203	NA	0.000988396	0.165898	0.959447	NA	19	6668961	G	A	0.7941	NM_144614	uc010dvf.2	7049320	+
7953390	ZNF384	rs1800693	0.320555	1024	0.848099	-0.0121713	0.369859	0.968985	NA	0.0194778	0.328217	0.962732	NA	12	6330843	G	A	0.45	ENST00000396799	uc001qqa.4; uc010sfh.3; uc058kiu.1; uc001qqd.4; uc058kiv.1; uc058kix.1; uc009zew.2; uc058kiy.1; uc058kiz.1; uc058kja.1; uc058kjb.1; uc058kjc.1; uc058kjd.1; uc058kje.1; uc058kjf.1; uc058kjg.1	6689510; 6689510; 6689292; 6689454; 6669157; 6673395; 6689455; 6678542; 6689297; 6688689; 6688569; 6688896; 6688859; 6689299; 6689456; 6689572	-
8007008	THRA	rs12946510	0.320768	1025	0.848099	-0.0165194	0.187184	0.942254	NA	0.0396397	0.615246	0.985816	NA	17	39756124	A	G	0.4912	NM_199334	uc002htv.4	40062898	+
8058106	RN7SL717P	rs281783	0.321259	1026	0.848099	-0.0266218	0.791481	0.996635	NA	-0.00978073	0.129431	0.945785	NA	2	199886859	A	G	0.8118	ENST00000478343	uc061rdi.1	199901377	-
8035380	IL12RB1	rs874628	0.321283	1027	0.848099	0.0103185	0.146047	0.935905	NA	0.0301775	0.381745	0.97225	NA	19	18193890	A	G	0.7	NM_001290023	uc002nhw.2; uc002nhx.2; uc002nhy.3; uc060vod.1; uc060voe.1; uc060vof.1; uc060vog.1	18087003; 18098944; 18086932; 18086996; 18098816; 18098927; 18086930	-
8003230	LINC00917	rs35929052	0.322312	1028	0.849473	-0.0430563	0.242008	0.942651	NA	-0.0656706	0.925372	0.999408	NA	16	85960878	G	A	0.8824	ENST00000600892	uc010chq.3	86337556	-
7959604	DDX55	rs1790100	0.323169	1029	0.849473	-0.0136551	0.914889	0.998203	NA	-0.00225078	0.668139	0.987612	NA	12	123172178	G	T	0.2324	NM_020936	uc001ufi.4	123602098	+
7944401	HMBS	rs523604	0.323264	1030	0.849473	-0.0160775	0.716566	0.99578	NA	-0.0105357	0.567176	0.977379	NA	11	118885029	A	G	0.5353	NM_000190	uc001puz.2	119084882	+
8014841	MED1	rs12946510	0.323665	1031	0.849473	-0.00917721	0.982168	0.999431	NA	0.000372288	0.183511	0.962732	NA	17	39756124	A	G	0.4912	NM_004774	uc002hrv.5	39451286	-
7948493	SLC15A3	rs34383631	0.324002	1032	0.849473	-0.0109521	0.490861	0.968985	NA	-0.0141161	0.619386	0.985816	NA	11	61025858	A	G	0.4676	NM_016582	uc001nqn.3	60951785	-
7991893	PRR35	rs2744148	0.324169	1033	0.849473	0.0125039	0.915401	0.998203	NA	0.00200232	0.838551	0.998254	NA	16	1023552	G	A	0.1559	NM_145270	uc002chk.4	560421	+
8015503	ZNF385C	rs744166	0.324189	1034	0.849473	0.0115016	0.681302	0.99462	NA	0.00856714	0.947666	0.999408	NA	17	42362183	G	A	0.3971	ENST00000496039	uc060fgh.1	42028131	-
7903024	NA	rs11810217	0.3245	1035	0.849473	0.0214817	0.452476	0.968985	NA	0.0241345	0.267767	0.962732	NA	1	92682820	A	G	0.2706	NA	uc057iie.1	92846058	+
7906642	KLHDC9	rs35967351	0.324623	1036	0.849473	-0.013337	0.978392	0.999028	NA	0.000617727	0.338142	0.962732	NA	1	160742014	A	T	0.6706	NM_001007255	uc001fxs.4	161098393	+
7921259	FCRL4	rs2050568	0.325052	1037	0.849776	-0.0131047	0.122023	0.930133	NA	-0.0361996	0.376207	0.970201	NA	1	157800451	G	A	0.5325	NM_031282	uc001fqw.3	157598080	-
8076909	TUBGCP6	rs470119	0.325505	1038	0.850066	0.00978712	0.210009	0.942254	NA	-0.021489	0.461318	0.974744	NA	22	50528485	A	G	0.3882	NM_020461	uc003bkb.2	50244564	-
7944341	UPK2	rs523604	0.325791	1039	0.850066	0.0128117	0.196909	0.942254	NA	-0.0285266	0.763948	0.998254	NA	11	118885029	A	G	0.5353	NM_006760	uc001puh.4	118956315	+
7921259	FCRL4	rs3761959	0.326808	1040	0.8519	-0.0127622	0.120309	0.930133	NA	-0.0370156	0.828401	0.998254	NA	1	157699488	G	A	0.5559	NM_031282	uc001fqw.3	157598080	-
8089911	HCLS1	rs9282641	0.327175	1041	0.852039	-0.0135506	0.491003	0.968985	NA	-0.0113808	0.152991	0.952715	NA	3	122077921	G	A	0.9	NM_005335	uc003eeh.5	121660911	-
7953291	CD9	rs12296430	0.32797	1042	0.852904	0.112855	0.603495	0.99462	NA	0.105261	0.931514	0.999408	NA	12	6394334	C	G	0.2235	NM_001769	uc001qnq.3	6200448	+
7903391	NA	rs12027668	0.328137	1043	0.852904	-0.0166989	0.578135	0.99462	NA	-0.016719	0.880739	0.999408	NA	1	100865428	G	A	0.429	NA	uc057iru.1	101133152	+
8067610	CHRNA4	rs2256814	0.328752	1044	0.853564	-0.0135767	0.806376	0.998203	NA	0.00563708	0.373035	0.970201	NA	20	63742630	A	G	0.2088	NM_000744	uc061ymc.1; uc061ymg.1; uc061ymi.1; uc061ymd.1; uc061ymj.1; uc061yml.1; uc061ymh.1; uc061yme.1; uc061ymf.1; uc002yes.4; uc010gke.2; uc061ymb.1; uc061ymn.1; uc061ymo.1	63346935; 63351131; 63356138; 63359699; 63359839; 63361165; 63361190; 63361304; 63361304; 63361343; 63361396; 63377993; 63378137; 63378401	-
8007058	WIPF2	rs12946510	0.329239	1045	0.853564	0.0106887	0.742049	0.99578	NA	0.00674908	0.673031	0.9884	NA	17	39756124	A	G	0.4912	NM_133264	uc002hug.2	40219321	+
8083737	MIR15B	rs4680534	0.329534	1046	0.853564	-0.0308013	0.971674	0.998203	NA	-0.00207048	0.325962	0.962732	NA	3	159981157	C	T	0.3882	NR_029663	uc011boz.1	160404587	+
8035380	IL12RB1	rs11554159	0.32965	1047	0.853564	0.0101388	0.158269	0.935905	NA	0.0292431	0.370565	0.970201	NA	19	18175134	G	A	0.7235	NM_001290023	uc002nhw.2; uc002nhx.2; uc002nhy.3; uc060vod.1; uc060voe.1; uc060vof.1; uc060vog.1	18087003; 18098944; 18086932; 18086996; 18098816; 18098927; 18086930	-
8066574	WFDC10B	rs2425752	0.330564	1048	0.855114	0.0137686	0.805915	0.998203	NA	0.00614962	0.0844989	0.944376	NA	20	46073481	A	G	0.2853	NM_172006	uc002xpb.4	45705019	-
7999423	SOCS1	rs7191700	0.331833	1049	0.85706	-0.0120324	0.732918	0.99578	NA	-0.00774221	0.574218	0.977379	NA	16	11312946	C	T	0.6627	NM_003745	uc002dar.2	11256179	-
7998427	TPSG1	rs2744148	0.331949	1050	0.85706	0.0130537	0.637016	0.99462	NA	-0.0088462	0.122081	0.944376	NA	16	1023552	G	A	0.1559	NM_012467	uc002ckw.3	1225257	-
7923332	TNNT2	rs7522462	0.332402	1051	0.857414	0.0139891	0.264105	0.951976	NA	-0.0257397	0.978097	0.999408	NA	1	200912467	G	A	0.7176	NM_000364	uc057ohb.1; uc009wzp.5; uc057ohc.1; uc001gwg.5; uc057ohd.1; uc057ohe.1; uc057ohf.1; uc057ohg.1; uc057ohh.1; uc057ohi.1; uc057ohj.1; uc001gwi.5; uc057ohk.1; uc057ohl.1; uc009wzs.2; uc057ohm.1; uc057ohn.1; uc057oho.1; uc057ohp.1; uc057ohq.1; uc057ohr.1; uc057ohs.1; uc057oht.1; uc057ohu.1; uc057ohv.1	201363350; 201364188; 201377661; 201377680; 201377680; 201373254; 201373254; 201373254; 201377700; 201373266; 201377664; 201377661; 201377762; 201377664; 201366966; 201361357; 201373315; 201377633; 201367808; 201377652; 201377664; 201368314; 201373265; 201375368; 201377680	-
7949206	MEN1	rs694739	0.332866	1052	0.857794	-0.00777642	0.0270054	0.908035	NA	-0.0344964	0.858632	0.999383	NA	11	64329761	A	G	0.6382	NM_130799	uc001obm.4	64810716	-
8071566	PPIL2	rs2283792	0.333378	1053	0.858107	-0.00993649	0.594219	0.99462	NA	0.010958	0.449751	0.974744	NA	22	21776836	C	A	0.5	NM_014337	uc062bzt.1	21666039	+
8030292	DKKL1	rs8107548	0.33413	1054	0.858107	-0.0158849	0.975964	0.999028	NA	0.000941842	0.999691	0.999691	NA	19	49367386	G	A	0.2647	NM_001197301	uc061bbq.1	49363933	+
7944271	TTC36	rs533646	0.334324	1055	0.858107	0.0123686	0.710631	0.995524	NA	-0.00853009	0.477085	0.974744	NA	11	118696037	G	C	0.6607	NM_001080441	uc001ptg.2	118527471	+
8105077	CARD6	rs4613763	0.334375	1056	0.858107	0.0288178	0.165216	0.935905	NA	0.0399576	0.23216	0.962732	NA	5	40392626	G	A	0.09412	NM_032587	uc003jmg.4	40841183	+
8076937	HDAC10	rs470119	0.334862	1057	0.858107	0.00959866	0.930528	0.998203	NA	0.00146058	0.349042	0.970201	NA	22	50528485	A	G	0.3882	NM_001159286	uc010hav.4	50251032	-
8033956	S1PR2	rs2288904	0.335095	1058	0.858107	0.0126275	0.220369	0.942254	NA	0.022689	0.0226158	0.907602	NA	19	10631494	G	A	0.7882	NM_004230	uc002mnl.3	10231272	-
8082012	SLC15A2	rs1920296	0.335278	1059	0.858107	-0.0156155	0.156634	0.935905	NA	-0.038311	0.032605	0.907602	NA	3	121824730	C	A	0.6088	NM_001145998	uc011bjn.2	121894439	+
8007323	CNTNAP1	rs744166	0.335519	1060	0.858107	-0.0117147	0.72628	0.99578	NA	-0.0079619	0.915347	0.999408	NA	17	42362183	G	A	0.3971	NM_003632	uc002iay.4	42682612	+
7975799	FLVCR2	rs4903324	0.33586	1061	0.858168	-0.0201269	0.0528428	0.908035	NA	0.0557767	0.022928	0.907602	NA	14	75495168	A	G	0.2088	NM_001195283	uc010tvd.2	75605461	+
8016400	MIR152	rs4239162	0.336278	1062	0.858427	-0.0123467	0.233948	0.942254	NA	-0.0285998	0.870421	0.999408	NA	17	47678444	G	A	0.5059	NR_029687	uc010wld.2	48037262	-
7968972	COX17	rs2293370	0.337352	1063	0.859103	0.0146241	0.404602	0.968985	NA	0.0177854	0.476203	0.974744	NA	3	119501087	G	A	0.8521	NM_005694	uc003ecz.2	119677403	-
8041640	LINC01126	rs2163226	0.337416	1064	0.859103	-0.0223474	0.562147	0.99462	NA	-0.0203938	0.0001053	0.116848	NA	2	43134117	A	G	0.7059	NR_027251	uc010ynx.2	43227209	+
7918913	IGSF3	rs1335532	0.337493	1065	0.859103	-0.0173029	0.0639404	0.908035	NA	0.043911	0.0669195	0.944376	NA	1	116558335	A	G	0.8647	NM_001007237	uc001egr.3	116667753	-
7918900	RNU6-817P	rs6677309	0.338074	1066	0.859455	0.0222982	0.81158	0.998203	NA	-0.00683061	0.265325	0.962732	NA	1	116537544	A	C	0.8728	ENST00000391083	uc057jsb.1	116413869	-
8041640	LINC01126	rs12466022	0.338266	1067	0.859455	-0.0231413	0.596994	0.99462	NA	-0.0189546	0.0505081	0.944376	NA	2	43131922	C	A	0.7147	NR_027251	uc010ynx.2	43227209	+
8015706	RAMP2-AS1	rs2293152	0.339172	1068	0.860343	-0.0146188	0.221123	0.942254	NA	0.0313729	0.981597	0.999408	NA	17	42329511	C	G	0.6235	NR_024461	uc002ibf.6	42761103	-
7931914	IL2RA	rs3118470	0.33925	1069	0.860343	-0.0145395	0.258963	0.951976	NA	0.0300304	0.822471	0.998254	NA	10	6059750	G	A	0.3294	NM_000417	uc001iiz.3	6062325	-
8063043	UBE2C	rs2425752	0.339739	1070	0.860777	0.00887405	0.421567	0.968985	NA	-0.0141366	0.810144	0.998254	NA	20	46073481	A	G	0.2853	NM_001281741	uc032pld.2	45812575	+
8047125	RNU6-959P	rs9967792	0.3401	1071	0.860888	-0.0181053	0.365518	0.968985	NA	-0.031949	0.708968	0.998254	NA	2	191109709	G	A	0.6618	ENST00000384671	uc061qtn.1	191121949	+
7977033	AMN	rs12148050	0.342105	1072	0.861923	-0.00780456	0.466225	0.968985	NA	0.0104267	0.164452	0.957749	NA	14	102797451	A	G	0.3441	NM_030943	uc001ymg.5	102922655	+
7999496	ZC3H7A	rs6498184	0.342168	1073	0.861923	-0.0104724	0.250377	0.951976	NA	0.0199019	0.198794	0.962732	NA	16	11342133	G	A	0.8235	NM_014153	uc002dbl.4	11797267	-
7953878	CLEC2D	rs11052877	0.342275	1074	0.861923	-0.0222479	0.501848	0.972686	NA	0.027085	0.0152997	0.907602	NA	12	9753094	G	A	0.3882	NM_001004419	uc001qwf.4	9669712	+
7928630	EIF5AL1	rs1250550	0.342485	1075	0.861923	0.00727263	0.598312	0.99462	NA	-0.00660979	0.637753	0.985816	NA	10	79300560	A	C	0.3588	NM_001099692	uc009xrx.4	79512600	+
7956417	RNU6-879P	rs12368653	0.342791	1076	0.861923	0.0138402	0.671157	0.99462	NA	-0.0104818	0.703147	0.998254	NA	12	57739473	A	G	0.4765	ENST00000364328	uc058pvk.1	57415295	+
7959473	DENR	rs949143	0.343104	1077	0.861923	0.0145058	0.367853	0.968985	NA	-0.0221282	0.979295	0.999408	NA	12	123110616	G	A	0.3176	AB014731	uc001uda.4; uc058uoh.1; uc058uoi.1; uc058uoj.1	122752773; 122752823; 122752826; 122752846	+
8066579	WFDC3	rs2425752	0.343257	1078	0.861923	0.0153861	0.152087	0.935905	NA	-0.0404306	0.197119	0.962732	NA	20	46073481	A	G	0.2853	NM_080614	uc002xpf.1	45791908	-
7964548	METTL1	rs12368653	0.343893	1079	0.861923	0.0185079	0.463033	0.968985	NA	-0.0259296	0.244273	0.962732	NA	12	57739473	A	G	0.4765	NM_005371	uc010ssd.3	57772793	-
8038441	RNU6-841P	rs8107548	0.344359	1080	0.861923	-0.0133556	0.730972	0.99578	NA	0.00879759	0.652099	0.985816	NA	19	49367386	G	A	0.2647	ENST00000383872	uc061bjb.1	49764630	-
7960529	SCNN1A	rs1800693	0.34482	1081	0.861923	-0.0105488	0.286512	0.951976	NA	0.0204259	0.115494	0.944376	NA	12	6330843	G	A	0.45	NM_001038	uc001qnx.4	6375549	-
7980580	GALC	rs74796499	0.344824	1082	0.861923	0.0262154	0.433508	0.968985	NA	-0.01733	0.632723	0.985816	NA	14	87965984	C	A	0.95882	NM_000153	uc001xvt.3	87993271	-
8083739	MIR16-2	rs2243123	0.344959	1083	0.861923	-0.0171887	0.34789	0.968985	NA	0.0289255	0.413876	0.974744	NA	3	159991864	G	A	0.3	NR_029525	uc003fdk.3	160404744	+
7906662	UFC1	rs35967351	0.345114	1084	0.861923	0.0082308	0.64098	0.99462	NA	0.00663784	0.167307	0.961782	NA	1	160742014	A	T	0.6706	NM_016406	uc001fyd.5	161153751	+
8007420	AOC3	rs744166	0.345428	1085	0.861923	0.0155445	0.109883	0.929176	NA	0.0464447	0.64596	0.985816	NA	17	42362183	G	A	0.3971	NM_001277731	uc031rao.3	42851183	+
7940891	DNAJC4	rs694739	0.3457	1086	0.861923	0.00912037	0.569445	0.99462	NA	-0.0103726	0.00404314	0.846137	NA	11	64329761	A	G	0.6382	NM_005528	uc001nys.4	64230277	+
8063074	ZSWIM1	rs2425752	0.345758	1087	0.861923	0.0103546	0.14505	0.935905	NA	0.0291211	0.0445344	0.944376	NA	20	46073481	A	G	0.2853	NM_080603	uc010ghi.4	45881226	+
7919051	ZNF697	rs666930	0.345914	1088	0.861923	-0.0104227	0.123712	0.930133	NA	0.0327287	0.339731	0.962732	NA	1	119716347	G	A	0.5588	NM_001080470	uc001ehy.2	119647773	-
8015655	FAM134C	rs744166	0.346276	1089	0.862034	-0.00802023	0.413707	0.968985	NA	-0.0117773	0.117582	0.944376	NA	17	42362183	G	A	0.3971	NM_178126	uc060fkv.1	42609384	-
7956573	SLC26A10	rs703842	0.346651	1090	0.862176	-0.0155638	0.799962	0.998203	NA	0.00749423	0.837902	0.998254	NA	12	57768956	A	G	0.6882	NM_133489	uc001spe.4	57619909	+
8038395	NOSIP	rs2303759	0.347476	1091	0.863435	-0.00858301	0.474751	0.968985	NA	0.0130196	0.876018	0.999408	NA	19	49365794	C	A	0.2692	NM_001270960	uc061bfk.1; uc061bfl.1; uc061bfm.1; uc002pol.5; uc061bfn.1; uc061bfo.1; uc061bfp.1; uc061bfq.1; uc061bfr.1; uc061bfs.1; uc061bft.1; uc061bfu.1; uc061bfv.1; uc061bfw.1; uc061bfx.1; uc061bfy.1	49560630; 49580535; 49580558; 49580572; 49580555; 49557295; 49560049; 49590262; 49560691; 49580532; 49580556; 49579278; 49560050; 49560397; 49560037; 49580547	-
8006958	ZPBP2	rs12946510	0.348171	1092	0.86386	0.0149063	0.804816	0.998203	NA	0.00705747	0.221418	0.962732	NA	17	39756124	A	G	0.4912	NM_198844	uc002htf.4	39868215	+
7967325	HCAR1	rs949143	0.348324	1093	0.86386	0.0143738	0.0740175	0.908035	NA	-0.0494654	0.62042	0.985816	NA	12	123110616	G	A	0.3176	NM_032554	uc001ucz.4	122730843	-
8129848	IL22RA2	rs7769192	0.349369	1094	0.86386	-0.0163718	0.517316	0.975079	NA	0.0217292	0.0102743	0.907602	NA	6	137641518	G	A	0.5	NM_052962	uc003qhl.4	137173648	-
8081890	PLA1A	rs1132200	0.349604	1095	0.86386	0.0172736	0.133263	0.934639	NA	-0.0352232	0.608683	0.985816	NA	3	119431989	C	T	0.8706	NM_001206960	uc003ecv.4	119597884	+
7948476	PRPF19	rs650258	0.349621	1096	0.86386	-0.00668748	0.942712	0.998203	NA	-0.00103285	0.972647	0.999408	NA	11	61064810	G	A	0.65	NM_014502	uc001nqf.4	60906588	-
8064208	DNAJC5	rs6062314	0.350073	1097	0.86386	0.0117163	0.934105	0.998203	NA	-0.00118925	0.762455	0.998254	NA	20	63778360	A	G	0.91471	NM_025219	uc002yhf.4	63895181	+
8033233	TUBB4A	rs1077667	0.351285	1098	0.86386	0.0151564	0.950849	0.998203	NA	0.00154383	0.676335	0.991086	NA	19	6668961	G	A	0.7941	NM_001289123	uc060sjy.1	6502803	-
7923271	CACNA1S	rs12122721	0.351322	1099	0.86386	0.0127066	0.768812	0.99578	NA	0.00613265	0.399374	0.974744	NA	1	201015352	G	A	0.7029	NM_000069	uc001gvv.4	201112566	-
7902977	KIAA1107	rs41286801	0.351618	1100	0.86386	0.0224653	0.95267	0.998203	NA	-0.00189038	0.06927	0.944376	NA	1	92509907	A	G	0.1941	NM_015237	uc010otd.2	92167051	+
8007992	KPNB1	rs4794058	0.352248	1101	0.86386	0.00863297	0.250699	0.951976	NA	0.021274	0.711967	0.998254	NA	17	47519732	A	G	0.503	NM_001276453	uc010wkw.2	47651195	+
7934432	RNU6-883P	rs2688608	0.352449	1102	0.86386	0.014526	0.157516	0.935905	NA	0.0402641	0.186674	0.962732	NA	10	73898591	A	C	0.6147	ENST00000384597	uc057ubx.1	73529157	-
7927305	AGAP5	rs2688608	0.352587	1103	0.86386	0.0112573	0.752576	0.99578	NA	-0.00712914	0.584586	0.979196	NA	10	73898591	A	C	0.6147	NM_001144000	uc009xri.4	73697867	-
7917304	MCOLN3	rs11587876	0.352628	1104	0.86386	-0.016005	0.948442	0.998203	NA	0.00183702	0.817935	0.998254	NA	1	85449500	A	G	0.7618	NM_001253693	uc001dkq.4	85048446	-
7906307	KIRREL	rs3761959	0.352958	1105	0.86386	0.00836023	0.511382	0.972686	NA	-0.0109607	0.766022	0.998254	NA	1	157699488	G	A	0.5559	NM_001286349	uc001frp.4	157993272	+
7934753	EIF5AL1	rs1250550	0.353816	1106	0.86386	0.00710305	0.650707	0.99462	NA	-0.00568337	0.74909	0.998254	NA	10	79300560	A	C	0.3588	NM_001099692	uc009xrx.4	79512600	+
8111552	NADK2	rs6897932	0.353831	1107	0.86386	0.0139465	0.616195	0.99462	NA	-0.0126408	0.461114	0.974744	NA	5	35874473	G	A	0.7059	NM_001085411	uc003jkf.6	36241798	-
8111552	NADK2	rs6881706	0.353831	1108	0.86386	0.0139465	0.616195	0.99462	NA	-0.0126408	0.461114	0.974744	NA	5	35879054	C	A	0.7059	NM_001085411	uc003jkf.6	36241798	-
8007212	STAT5A	rs2293152	0.355254	1109	0.86386	0.00958223	0.156289	0.935905	NA	-0.0239903	0.546288	0.974744	NA	17	42329511	C	G	0.6235	NM_001288718	uc010cya.3	42287866	+
7960682	PIANP	rs12296430	0.35526	1110	0.86386	0.0117433	0.0990465	0.929176	NA	-0.0341799	0.946069	0.999408	NA	12	6394334	C	G	0.2235	NM_001244014	uc001qqg.3	6700800	-
8007208	HSPB9	rs2293152	0.355338	1111	0.86386	-0.0141401	0.918156	0.998203	NA	-0.00257116	0.91858	0.999408	NA	17	42329511	C	G	0.6235	NM_033194	uc002hyy.3	42121430	+
8109595	NA	rs11743296	0.35587	1112	0.86386	-0.0168652	0.0583533	0.908035	NA	-0.0443588	0.939119	0.999408	NA	5	159497075	A	G	0.1559	NA	uc063jfk.1	159230193	+
8074131	SHANK3	rs470119	0.356953	1113	0.86386	-0.00908366	0.987	0.999431	NA	0.000272821	0.518388	0.974744	NA	22	50528485	A	G	0.3882	NM_033517	uc062fom.2	50674641	+
8130505	EZR	rs1738074	0.357238	1114	0.86386	-0.0105024	0.943037	0.998203	NA	0.00152774	0.215369	0.962732	NA	6	159044945	G	A	0.6147	NM_001111077	uc003qru.5	158819412	-
8033960	FDX1L	rs8112449	0.357482	1115	0.86386	-0.00980772	0.46428	0.968985	NA	0.0137245	0.621997	0.985816	NA	19	10409388	G	A	0.6353	NM_001031734	uc002mny.3	10316015	-
7976080	GPR65	rs74796499	0.357524	1116	0.86386	-0.0287157	0.343275	0.968985	NA	-0.0265951	0.193532	0.962732	NA	14	87965984	C	A	0.95882	NM_003608	uc001xvv.3	88005123	+
7911683	C1orf86	rs3748817	0.357543	1117	0.86386	-0.00712907	0.759027	0.99578	NA	-0.00436494	0.710263	0.998254	NA	1	2594226	A	G	0.6559	NM_001256947	uc031pku.2	2194750	-
8007197	NKIRAS2	rs2293152	0.357678	1118	0.86386	-0.00716539	0.927548	0.998203	NA	-0.0011539	0.601565	0.985816	NA	17	42329511	C	G	0.6235	NM_001001349	uc002hyq.4	42017019	+
8105434	RNU6-299P	rs71624119	0.35788	1119	0.86386	-0.0215049	0.579294	0.99462	NA	-0.0218438	0.219778	0.962732	NA	5	56144903	G	A	0.7706	ENST00000517223	uc063dso.1	56125670	+
8015545	RAB5C	rs744166	0.35823	1120	0.86386	-0.00627726	0.667277	0.99462	NA	0.00518939	0.551731	0.974744	NA	17	42362183	G	A	0.3971	NM_001252039	uc010cxx.4	42154988	-
7960553	MRPL51	rs12296430	0.358368	1121	0.86386	0.0133882	0.0871302	0.9085	NA	0.0400244	0.563366	0.977379	NA	12	6394334	C	G	0.2235	NM_016497	uc001qom.3	6493598	-
7904281	C1orf137	rs2300747	0.358717	1122	0.86386	-0.0180525	0.50171	0.972686	NA	-0.0170814	0.133498	0.948564	NA	1	116561593	A	G	0.8676	NM_001013643	uc031una.2	116694111	+
8074003	TRABD	rs470119	0.358917	1123	0.86386	-0.00904677	0.373323	0.968985	NA	-0.0148256	0.198857	0.962732	NA	22	50528485	A	G	0.3882	NM_025204	uc003bjs.2	50185916	+
8076962	MAPK12	rs470119	0.358945	1124	0.86386	-0.00982874	0.43234	0.968985	NA	-0.0136574	0.669149	0.987612	NA	22	50528485	A	G	0.3882	NM_002969	uc003bkm.2	50261825	-
7967325	HCAR1	rs7132277	0.359234	1125	0.86386	0.017184	0.0578958	0.908035	NA	-0.0526656	0.283141	0.962732	NA	12	123108835	A	G	0.1941	NM_032554	uc001ucz.4	122730843	-
7934434	MYOZ1	rs2688608	0.35956	1126	0.86386	0.0120204	0.618918	0.99462	NA	0.0115557	0.772751	0.998254	NA	10	73898591	A	C	0.6147	NM_021245	uc001jur.5	73641757	-
7921667	CD48	rs35967351	0.35983	1127	0.86386	0.00865104	0.163826	0.935905	NA	0.021486	0.669236	0.987612	NA	1	160742014	A	T	0.6706	NM_001778	uc001fwn.4	160711851	-
7903358	VCAM1	rs7552544	0.359832	1128	0.86386	-0.0135721	0.998519	0.999681	NA	-5.26447e-05	0.0591777	0.944376	NA	1	100775337	A	G	0.5828	NM_001078	uc001dti.5	100719759	+
8035477	ELL	rs874628	0.359967	1129	0.86386	0.00803778	0.647238	0.99462	NA	0.0082009	0.46357	0.974744	NA	19	18193890	A	G	0.7	NM_006532	uc002njh.3	18522127	-
8048889	FBXO36	rs10201872	0.360742	1130	0.86386	0.0202864	0.211034	0.942254	NA	0.0367909	0.308514	0.962732	NA	2	230242009	A	G	0.1824	AK289655	uc061tho.1; uc061thp.1; uc002vqb.4; uc002vqa.4	229922490; 229922505; 229922301; 229922495	+
8078450	CRTAP	rs28723576	0.360856	1131	0.86386	-0.00755415	0.934291	0.998203	NA	-0.00116542	0.697829	0.998254	NA	3	32936460	A	G	0.5414	NM_006371	uc003cfl.5	33113978	+
7935011	CPEB3	rs7923837	0.361019	1132	0.86386	0.00993643	0.481428	0.968985	NA	-0.0129059	0.454028	0.974744	NA	10	92722160	G	A	0.6471	NM_001178137	uc001khv.3	92243246	-
8038443	FUZ	rs2303759	0.361057	1133	0.86386	0.00750487	0.0523053	0.908035	NA	-0.0325497	0.652977	0.985816	NA	19	49365794	C	A	0.2692	NM_001171937	uc002ppu.4	49813175	-
7999433	NA	rs12927355	0.361393	1134	0.86386	-0.013601	0.484393	0.968985	NA	0.0172024	0.950137	0.999408	NA	16	11100914	G	A	0.7059	NA	uc059qus.1	11274236	-
7967318	HCAR2	rs1790100	0.361929	1135	0.86386	-0.0373193	0.179603	0.942254	NA	0.0847736	0.286578	0.962732	NA	12	123172178	G	T	0.2324	NM_177551	uc001ucx.2	122703343	-
7908614	CAMSAP2	rs7522462	0.362684	1136	0.86386	-0.024197	0.364356	0.968985	NA	0.0389647	0.597605	0.985816	NA	1	200912467	G	A	0.7176	NM_203459	uc001gvk.4	200739557	+
7981377	ANKRD9	rs12148050	0.363129	1137	0.86386	-0.0113792	0.833779	0.998203	NA	-0.00422901	0.127728	0.944376	NA	14	102797451	A	G	0.3441	NM_152326	uc001ylz.2	102509791	-
8038367	SLC17A7	rs2303759	0.3646	1138	0.86386	0.0102741	0.3995	0.968985	NA	-0.0186885	0.946939	0.999408	NA	19	49365794	C	A	0.2692	NM_020309	uc002pnp.4	49441551	-
7921690	ITLN1	rs35967351	0.364941	1139	0.86386	-0.0143917	0.63142	0.99462	NA	0.0128769	0.787589	0.998254	NA	1	160742014	A	T	0.6706	NM_017625	uc001fxc.4	160885170	-
8007427	AOC3	rs744166	0.365396	1140	0.86386	0.0149077	0.201321	0.942254	NA	-0.0356348	0.34336	0.963613	NA	17	42362183	G	A	0.3971	NM_001277731	uc031rao.3	42851183	+
7999396	TEKT5	rs12927355	0.365465	1141	0.86386	0.0141991	0.825487	0.998203	NA	-0.00546312	0.342455	0.962732	NA	16	11100914	G	A	0.7059	NM_144674	uc002czz.2	10694945	-
7952086	TREH	rs533646	0.365625	1142	0.86386	-0.0101736	0.867618	0.998203	NA	-0.00318307	0.816911	0.998254	NA	11	118696037	G	C	0.6607	NM_007180	uc031ygn.2	118679673	-
7904303	CD101	rs1335532	0.366068	1143	0.86386	-0.0571912	0.721462	0.99578	NA	-0.0270556	0.474514	0.974744	NA	1	116558335	A	G	0.8647	NM_001256106	uc057jsu.1; uc010oxc.3; uc057jsx.1; uc057jsy.1	117001749; 117001811; 117032943; 117034046	+
7964484	B4GALNT1	rs12368653	0.366105	1144	0.86386	-0.0121543	0.0846067	0.908035	NA	-0.0394127	0.409543	0.974744	NA	12	57739473	A	G	0.4765	NM_001276469	uc001spi.5	57633202	-
7917338	BCL10	rs12087340	0.366174	1145	0.86386	0.0164763	0.837367	0.998203	NA	0.00383048	0.746278	0.998254	NA	1	85281310	A	G	0.07647	NM_003921	uc021opd.3	85277090	-
8078435	TRIM71	rs28723576	0.366951	1146	0.86386	-0.010397	0.983234	0.999431	NA	-0.000405626	0.978817	0.999408	NA	3	32936460	A	G	0.5414	NM_001039111	uc003cff.4	32818017	+
8091733	RNU2-31P	rs4680534	0.367337	1147	0.86386	-0.0202549	0.0403817	0.908035	NA	-0.0808783	0.434339	0.974744	NA	3	159981157	C	T	0.3882	ENST00000516954	uc062pmi.1	159808570	-
7928369	SEC24C	rs2688608	0.367762	1148	0.86386	-0.00757285	0.356251	0.968985	NA	0.0156004	0.000924872	0.528519	NA	10	73898591	A	C	0.6147	NM_004922	uc001juw.4	73744390	+
8063074	ZSWIM1	rs6074022	0.368101	1149	0.86386	0.010188	0.146934	0.935905	NA	0.0297586	0.0906095	0.944376	NA	20	46111557	C	T	0.2735	NM_080603	uc010ghi.4	45881226	+
7934442	SYNPO2L	rs2688608	0.368129	1150	0.86386	-0.0127821	0.765185	0.99578	NA	0.00734151	0.00175458	0.528519	NA	10	73898591	A	C	0.6147	NM_001114133	uc001jut.6	73656072	-
7906330	CD1D	rs2050568	0.368149	1151	0.86386	-0.00954143	0.764635	0.99578	NA	-0.00583085	0.628646	0.985816	NA	1	157800451	G	A	0.5325	NM_001766	uc001frr.4	158179946	+
8030360	SNORD32A	rs8107548	0.368217	1152	0.86386	-0.0273089	0.799488	0.998203	NA	0.0149042	0.727208	0.998254	NA	19	49367386	G	A	0.2647	NR_000021	uc061bed.1	49489964	+
8123104	FNDC1	rs212405	0.36823	1153	0.86386	-0.00804375	0.581498	0.99462	NA	0.00913452	0.36437	0.970201	NA	6	159049527	T	A	0.6824	NM_032532	uc010kjv.4	159169396	+
7931888	ANKRD16	rs3118470	0.368338	1154	0.86386	0.0125112	0.519433	0.975333	NA	-0.0155817	0.440018	0.974744	NA	10	6059750	G	A	0.3294	NM_001009941	uc009xif.4	5889871	-
7956488	KIF5A	rs201202118	0.368993	1155	0.86386	-0.00902813	0.810523	0.998203	NA	-0.00445787	0.152597	0.952715	NA	12	57788279	A	T	0.6964	NM_004984	uc001sor.2	57549997	+
8088813	PROK2	rs9828629	0.369266	1156	0.86386	-0.038473	0.285195	0.951976	NA	-0.0767248	0.800064	0.998254	NA	3	71481195	G	A	0.6676	NM_001126128	uc003dpa.5	71785061	-
8026830	FCHO1	rs11554159	0.369307	1157	0.86386	0.0121858	0.405493	0.968985	NA	-0.0205577	0.30198	0.962732	NA	19	18175134	G	A	0.7235	NM_001161357	uc060vlu.1	17747717	+
8007363	WNK4	rs9891119	0.369427	1158	0.86386	-0.0133986	0.282912	0.951976	NA	-0.0248564	0.195108	0.962732	NA	17	42355962	C	A	0.3265	NM_032387	uc002ibj.4	42780677	+
8007363	WNK4	rs4796791	0.369427	1159	0.86386	-0.0133986	0.282912	0.951976	NA	-0.0248564	0.195108	0.962732	NA	17	42378745	A	G	0.3265	NM_032387	uc002ibj.4	42780677	+
8130499	DYNLT1	rs212405	0.369634	1160	0.86386	-0.0142168	0.938332	0.998203	NA	-0.00221908	0.5259	0.974744	NA	6	159049527	T	A	0.6824	NM_001291602	uc063snu.1; uc003qrn.3; uc063snv.1	158642788; 158644739; 158644738	-
7944365	CCDC84	rs523604	0.370029	1161	0.864038	-0.00904622	0.889741	0.998203	NA	-0.00257129	0.154127	0.952715	NA	11	118885029	A	G	0.5353	NM_198489	uc001pul.5	118998141	+
7961120	CLEC7A	rs11052877	0.370414	1162	0.864194	-0.0133804	0.498806	0.972686	NA	0.0168962	0.328167	0.962732	NA	12	9753094	G	A	0.3882	NM_022570	uc001qxf.4	10130241	-
8030498	MED25	rs8107548	0.371079	1163	0.865001	-0.00639729	0.960884	0.998203	NA	0.000710282	0.0965191	0.944376	NA	19	49367386	G	A	0.2647	NM_030973	uc002ppw.3	49818288	+
8034097	ILF3-AS1	rs34536443	0.371527	1164	0.865086	-0.056231	0.450336	0.968985	NA	-0.0294922	0.0476186	0.944376	NA	19	10352442	C	G	0.97041	NR_024333	uc002mpj.4	10653844	-
7975815	TTLL5	rs4903324	0.371756	1165	0.865086	-0.0150961	0.527885	0.975333	NA	0.014822	0.494447	0.974744	NA	14	75495168	A	G	0.2088	NM_015072	uc001xrx.4	75661277	+
7994692	TAOK2	rs7204270	0.372073	1166	0.865086	0.00866433	0.63015	0.99462	NA	-0.00836356	0.140019	0.948749	NA	16	30145642	G	A	0.5265	NM_001252043	uc021tgf.2	29974181	+
8025612	ICAM4	rs8112449	0.372425	1167	0.865162	0.0410969	0.876042	0.998203	NA	0.0112672	0.856118	0.999383	NA	19	10409388	G	A	0.6353	NM_001039132	uc002mnr.3	10286973	+
8063369	RNF114	rs17785991	0.37301	1168	0.86578	0.00719477	0.0865878	0.908035	NA	0.0264976	0.832886	0.998254	NA	20	49822224	A	T	0.3265	NM_018683	uc002xux.4	49936347	+
8007921	MYL4	rs4794058	0.373967	1169	0.867258	0.0132935	0.113695	0.929176	NA	-0.0431729	0.312336	0.962732	NA	17	47519732	A	G	0.503	NM_001002841	uc002ilg.4	47209061	+
8007208	HSPB9	rs744166	0.374434	1170	0.867599	-0.013313	0.865735	0.998203	NA	-0.0042038	0.790265	0.998254	NA	17	42362183	G	A	0.3971	NM_033194	uc002hyy.3	42121430	+
7944435	HINFP	rs523604	0.374828	1171	0.867676	-0.00808292	0.972294	0.998203	NA	0.00060901	0.566599	0.977379	NA	11	118885029	A	G	0.5353	NM_001243259	uc021qrj.2	119121615	+
8121132	GJA10	rs12212193	0.375108	1172	0.867676	-0.0131098	0.0765324	0.908035	NA	-0.0441739	0.796288	0.998254	NA	6	90287050	G	A	0.5148	NM_032602	uc011eaa.3	89894468	+
8110399	B4GALT7	rs4976646	0.376461	1173	0.869453	0.00867643	0.0694502	0.908035	NA	-0.0323868	0.980341	0.999408	NA	5	177361569	G	A	0.3095	NM_007255	uc003mhy.4	177600099	+
8017143	PTRH2	rs180515	0.376824	1174	0.869453	0.0132222	0.239856	0.942254	NA	0.0336946	0.582289	0.978581	NA	17	59946914	G	A	0.35	ENST00000409433	uc060idm.1	59707626	-
8016336	OSBPL7	rs4239162	0.376838	1175	0.869453	-0.00758638	0.0220841	0.908035	NA	-0.0383586	0.804881	0.998254	NA	17	47678444	G	A	0.5059	NM_145798	uc002ilx.2	47821770	-
8139632	FIGNL1	rs201847125	0.377793	1176	0.870503	-0.0158057	0.156625	0.935905	NA	0.0418816	0.294935	0.962732	NA	7	50285971	G	A	0.7012	NM_001287495	uc032zml.1	50450390	-
8123101	C6orf99	rs212405	0.377935	1177	0.870503	0.029091	0.407994	0.968985	NA	-0.0473662	0.988192	0.999408	NA	6	159049527	T	A	0.6824	NM_001195032	uc063soc.1; uc063sod.1; uc063soe.1; uc063sof.1	158869938; 158870168; 158895216; 158908836	+
7994603	SPN	rs7204270	0.378501	1178	0.871066	-0.00978948	0.246724	0.950096	NA	0.0219668	0.695564	0.997796	NA	16	30145642	G	A	0.5265	NM_001030288	uc002dtm.5	29662978	+
7903334	CDC14A	rs7552544	0.379031	1179	0.871546	0.00950523	0.869793	0.998203	NA	0.00328565	0.202528	0.962732	NA	1	100775337	A	G	0.5828	NM_003672	uc001dtg.5	100352599	+
8067756	UCKL1	rs6062314	0.379352	1180	0.871546	0.0134672	0.430752	0.968985	NA	-0.0137489	0.857644	0.999383	NA	20	63778360	A	G	0.91471	NM_001193379	uc011abm.3	63951126	-
8063349	RNU6-919P	rs17785991	0.380007	1181	0.872311	-0.0184968	0.942585	0.998203	NA	-0.00276515	0.638956	0.985816	NA	20	49822224	A	T	0.3265	ENST00000516731	uc061xqn.1	49794810	+
8030498	MED25	rs2303759	0.380719	1182	0.872683	-0.00591498	0.925667	0.998203	NA	0.00129947	0.144232	0.952715	NA	19	49365794	C	A	0.2692	NM_030973	uc002ppw.3	49818288	+
7904281	C1orf137	rs1335532	0.380813	1183	0.872683	-0.0172578	0.480768	0.968985	NA	-0.0176852	0.12738	0.944376	NA	1	116558335	A	G	0.8647	NM_001013643	uc031una.2	116694111	+
8137202	ZNF862	rs354033	0.3818	1184	0.874207	0.00696726	0.941287	0.998203	NA	-0.00105592	0.307026	0.962732	NA	7	149592373	G	A	0.7265	NM_001099220	uc010lpn.4	149838366	+
7969770	RNU6-83P	rs4772201	0.383452	1185	0.875807	-0.024649	0.117605	0.929176	NA	-0.053436	0.773212	0.998254	NA	13	99434005	A	G	0.8118	NR_046948	uc032amy.2	99025233	+
8035456	LRRC25	rs11554159	0.384034	1186	0.875807	-0.00814019	0.214536	0.942254	NA	-0.0227933	0.76522	0.998254	NA	19	18175134	G	A	0.7235	NM_145256	uc002niw.4	18397617	-
8152819	RNU4-25P	rs4410871	0.385495	1187	0.875807	0.023647	0.506313	0.972686	NA	-0.0322587	0.52439	0.974744	NA	8	127802783	G	A	0.6794	ENST00000410569	uc022bbi.1	128010611	-
8026895	CCDC124	rs11554159	0.385739	1188	0.875807	-0.00756532	0.177376	0.942254	NA	-0.0220845	0.787335	0.998254	NA	19	18175134	G	A	0.7235	NM_001136203	uc010xpz.3	17933015	+
7994756	PPP4C	rs7204270	0.386521	1189	0.875807	-0.00623007	0.110299	0.929176	NA	0.0201065	0.515724	0.974744	NA	16	30145642	G	A	0.5265	NM_002720	uc002dwf.4	30075989	+
7944478	PDZD3	rs523604	0.386697	1190	0.875807	0.0112776	0.334988	0.968985	NA	-0.021398	0.660916	0.986643	NA	11	118885029	A	G	0.5353	NM_024791	uc001pvy.4	119185485	+
7897322	PHF13	rs3007421	0.386735	1191	0.875807	-0.0127594	0.0301662	0.908035	NA	-0.0387367	0.855455	0.999383	NA	1	6470129	A	G	0.1294	NM_153812	uc001aob.5	6613684	+
8030251	TRPM4	rs2303759	0.387467	1192	0.875807	-0.012093	0.780865	0.99578	NA	0.00710089	0.444944	0.974744	NA	19	49365794	C	A	0.2692	NM_017636	uc002pmw.4	49157740	+
7956573	SLC26A10	rs201202118	0.387748	1193	0.875807	-0.0146103	0.793997	0.997464	NA	0.00781207	0.844936	0.998254	NA	12	57788279	A	T	0.6964	NM_133489	uc001spe.4	57619909	+
8043349	ANAPC1	rs17174870	0.388339	1194	0.875807	-0.0148521	0.527936	0.975333	NA	0.0174544	0.0269674	0.907602	NA	2	111907624	G	A	0.7618	NM_022662	uc002thi.4	111884690	-
8008074	CDK5RAP3	rs4794058	0.388495	1195	0.875807	-0.00938388	0.325086	0.968985	NA	-0.019793	0.831361	0.998254	NA	17	47519732	A	G	0.503	NM_001278197	uc010wlc.4	47970533	+
8030128	PPP1R15A	rs2303759	0.388956	1196	0.875807	0.0132382	0.99181	0.999431	NA	0.000295586	0.220373	0.962732	NA	19	49365794	C	A	0.2692	NM_014330	uc002pky.5	48872391	+
8066559	WFDC9	rs6074022	0.389149	1197	0.875807	0.0201297	0.380803	0.968985	NA	0.0352425	0.128346	0.944376	NA	20	46111557	C	T	0.2735	NM_147198	uc002xoy.3	45631268	-
7991927	WFIKKN1	rs2744148	0.389368	1198	0.875807	0.0102514	0.558321	0.993834	NA	-0.0102244	0.0863747	0.944376	NA	16	1023552	G	A	0.1559	NM_053284	uc002cht.2	630931	+
8130539	TAGAP	rs212405	0.389968	1199	0.875807	0.0127325	0.243756	0.946736	NA	0.0299806	0.274474	0.962732	NA	6	159049527	T	A	0.6824	NM_001278733	uc003qrz.5; uc003qsa.5; uc003qsb.4	159045152; 159045152; 159045018	-
8035456	LRRC25	rs874628	0.390005	1200	0.875807	-0.00832882	0.206681	0.942254	NA	-0.0234554	0.717522	0.998254	NA	19	18193890	A	G	0.7	NM_145256	uc002niw.4	18397617	-
8052698	C1D	rs7592330	0.390096	1201	0.875807	0.00791634	0.375187	0.968985	NA	0.0160891	0.903568	0.999408	NA	2	68419651	A	G	0.5853	NM_001190263	uc061jxu.1; uc061jxs.1; uc002seb.4; uc061jxv.1; uc061jxt.1; uc002sec.4; uc061jxw.1	68046568; 68062982; 68062983; 68062994; 68063009; 68063025; 68110948	-
8052698	C1D	rs7595037	0.390096	1202	0.875807	0.00791634	0.375187	0.968985	NA	0.0160891	0.903568	0.999408	NA	2	68419963	A	G	0.5824	NM_001190263	uc061jxu.1; uc061jxs.1; uc002seb.4; uc061jxv.1; uc061jxt.1; uc002sec.4; uc061jxw.1	68046568; 68062982; 68062983; 68062994; 68063009; 68063025; 68110948	-
7903355	GPR88	rs11581062	0.390433	1203	0.875807	0.00918971	0.645734	0.99462	NA	0.00841355	0.52286	0.974744	NA	1	100941963	G	A	0.2853	NM_022049	uc001dth.4	100538136	+
7906348	CD1C	rs2050568	0.390527	1204	0.875807	0.0179663	0.55055	0.988938	NA	-0.0233758	0.330877	0.962732	NA	1	157800451	G	A	0.5325	NM_001765	uc001fru.4	158289785	+
8171876	METTL1	rs12368653	0.391037	1205	0.875807	-0.0219751	0.41137	0.968985	NA	-0.0342003	0.477664	0.974744	NA	12	57739473	A	G	0.4765	ENST00000553125	uc058qct.1	57772116	-
7948502	RNU6-933P	rs650258	0.391057	1206	0.875807	0.0193785	0.484099	0.968985	NA	-0.0276633	0.702717	0.998254	NA	11	61064810	G	A	0.65	ENST00000384424	uc058bxf.1	60985167	-
8064059	COL20A1	rs2256814	0.391143	1207	0.875807	0.00949953	0.836321	0.998203	NA	0.00383032	0.334118	0.962732	NA	20	63742630	A	G	0.2088	NM_020882	uc011aau.2	63293185	+
8033356	MBD3L5	rs1077667	0.391344	1208	0.875807	-0.0123929	0.789565	0.996634	NA	-0.00596152	0.291314	0.962732	NA	19	6668961	G	A	0.7941	NM_001136507	uc010xjl.3	7030577	+
8033359	MBD3L5	rs1077667	0.391344	1209	0.875807	-0.0123929	0.789565	0.996634	NA	-0.00596152	0.291314	0.962732	NA	19	6668961	G	A	0.7941	NM_001136507	uc010xjl.3	7030577	+
7904433	PHGDH	rs666930	0.391536	1210	0.875807	0.011057	0.826135	0.998203	NA	0.00538474	0.738628	0.998254	NA	1	119716347	G	A	0.5588	ENST00000369407	uc001eib.4	119719626	+
8083737	MIR15B	rs1014486	0.39168	1211	0.875807	-0.0278931	0.978092	0.999028	NA	-0.0016146	0.103639	0.944376	NA	3	159973324	G	A	0.4559	NR_029663	uc011boz.1	160404587	+
8033996	TYK2	rs8112449	0.391981	1212	0.875807	-0.00685998	0.0453098	0.908035	NA	0.0282181	0.133936	0.948564	NA	19	10409388	G	A	0.6353	NM_003331	uc002moc.5	10380676	-
7953878	CLEC2D	rs10466829	0.392384	1213	0.875807	-0.0191162	0.511981	0.972686	NA	0.0268612	0.0368855	0.936817	NA	12	9723495	A	G	0.5147	NM_001004419	uc001qwf.4	9669712	+
8033118	MLLT1	rs1077667	0.392427	1214	0.875807	-0.00853273	0.306341	0.968654	NA	0.0156614	0.662816	0.987249	NA	19	6668961	G	A	0.7941	NM_005934	uc002mek.4	6279948	-
7944401	HMBS	rs533646	0.392514	1215	0.875807	0.0149959	0.484032	0.968985	NA	-0.0208869	0.734911	0.998254	NA	11	118696037	G	C	0.6607	NM_000190	uc001puz.2	119084882	+
8038367	SLC17A7	rs8107548	0.393278	1216	0.875813	0.00982887	0.424002	0.968985	NA	-0.0179062	0.921463	0.999408	NA	19	49367386	G	A	0.2647	NM_020309	uc002pnp.4	49441551	-
8015642	PSMC3IP	rs9891119	0.393486	1217	0.875813	-0.0112968	0.0184562	0.908035	NA	0.0567878	0.0933566	0.944376	NA	17	42355962	C	A	0.3265	NM_001256014	uc002iaj.5	42577697	-
8015642	PSMC3IP	rs4796791	0.393486	1218	0.875813	-0.0112968	0.0184562	0.908035	NA	0.0567878	0.0933566	0.944376	NA	17	42378745	A	G	0.3265	NM_001256014	uc002iaj.5	42577697	-
8033241	CD70	rs1077667	0.39396	1219	0.876149	-0.0131541	0.551115	0.988938	NA	0.0138607	0.398206	0.974744	NA	19	6668961	G	A	0.7941	NM_001252	uc002mfi.3	6591152	-
8030448	CPT1C	rs2303759	0.396099	1220	0.87748	-0.00930281	0.629987	0.99462	NA	0.0102723	0.857259	0.999383	NA	19	49365794	C	A	0.2692	NM_001136052	uc002ppk.4	49691143	+
8015642	PSMC3IP	rs744166	0.397476	1221	0.87748	-0.0103168	0.0140837	0.908035	NA	0.057662	0.109934	0.944376	NA	17	42362183	G	A	0.3971	NM_001256014	uc002iaj.5	42577697	-
7908614	CAMSAP2	rs55838263	0.397596	1222	0.87748	-0.0226385	0.365882	0.968985	NA	0.038342	0.578996	0.978566	NA	1	200905600	A	G	0.7118	NM_203459	uc001gvk.4	200739557	+
8026830	FCHO1	rs874628	0.39842	1223	0.87748	0.0111236	0.423419	0.968985	NA	-0.0197448	0.322899	0.962732	NA	19	18193890	A	G	0.7	NM_001161357	uc060vlu.1	17747717	+
7925978	FAM208B	rs3118470	0.398452	1224	0.87748	0.00954231	0.127422	0.932519	NA	0.0316028	0.569489	0.977379	NA	10	6059750	G	A	0.3294	NM_017782	uc001iij.3	5684837	+
8030277	CD37	rs8107548	0.398813	1225	0.87748	-0.00557054	0.450728	0.968985	NA	0.00916978	0.854469	0.999383	NA	19	49367386	G	A	0.2647	NM_001040031	uc002pne.4	49335395	+
8015554	KCNH4	rs9891119	0.39888	1226	0.87748	0.0105431	0.453349	0.968985	NA	-0.0155998	0.03832	0.937584	NA	17	42355962	C	A	0.3265	NM_012285	uc002hzb.3	42181278	-
8015554	KCNH4	rs4796791	0.39888	1227	0.87748	0.0105431	0.453349	0.968985	NA	-0.0155998	0.03832	0.937584	NA	17	42378745	A	G	0.3265	NM_012285	uc002hzb.3	42181278	-
7992021	STUB1	rs2744148	0.399106	1228	0.87748	-0.0112086	0.0840446	0.908035	NA	0.0330679	0.0502752	0.944376	NA	16	1023552	G	A	0.1559	NM_001293197	uc002ciu.4	680223	+
7952132	SLC37A4	rs533646	0.399472	1229	0.87748	0.00828034	0.298751	0.961895	NA	-0.0196787	0.890325	0.999408	NA	11	118696037	G	C	0.6607	NM_001164277	uc058idf.1	119030906	-
8064175	SLC2A4RG	rs2256814	0.39958	1230	0.87748	0.0101274	0.487906	0.968985	NA	0.0133402	0.433189	0.974744	NA	20	63742630	A	G	0.2088	NM_020062	uc002ygq.4	63739860	+
7999423	SOCS1	rs4780346	0.40007	1231	0.87748	-0.0118162	0.581443	0.99462	NA	-0.0122461	0.795042	0.998254	NA	16	11194949	A	G	0.2618	NM_003745	uc002dar.2	11256179	-
7964596	RN7SKP65	rs201202118	0.40007	1232	0.87748	0.0275662	0.266454	0.951976	NA	-0.0632299	0.377105	0.970201	NA	12	57788279	A	T	0.6964	ENST00000410278	uc058qej.1	57978277	-
8015665	PLEKHH3	rs2293152	0.4004	1233	0.87748	-0.0118906	0.354763	0.968985	NA	-0.0217826	0.984287	0.999408	NA	17	42329511	C	G	0.6235	NM_024927	uc002iau.5	42676951	-
7953428	CD4	rs1800693	0.400491	1234	0.87748	-0.00844632	0.0680952	0.908035	NA	0.0337564	0.713624	0.998254	NA	12	6330843	G	A	0.45	NM_000616	uc001qqv.3	6789471	+
8102004	RN7SL728P	rs228614	0.401336	1235	0.87748	0.0126956	0.958228	0.998203	NA	-0.00148482	0.384167	0.974253	NA	4	102657480	G	A	0.5324	ENST00000464718	uc062yod.1	102348691	-
8066609	SPATA25	rs4810485	0.401602	1236	0.87748	0.010754	0.826896	0.998203	NA	-0.00484902	0.891992	0.999408	NA	20	46119308	A	C	0.2706	NM_080608	uc002xqf.4	45887635	-
8026631	F2RL3	rs1870071	0.402136	1237	0.87748	-0.0091456	0.166081	0.935905	NA	0.026065	0.50456	0.974744	NA	19	16394295	G	A	0.2882	NM_003950	uc002nfa.4	16888859	+
8044440	FBLN7	rs17174870	0.402331	1238	0.87748	0.0104663	0.620174	0.99462	NA	0.0100273	0.429042	0.974744	NA	2	111907624	G	A	0.7618	NM_153214	uc002tho.2	112138384	+
7997372	RNA5SP431	rs12149527	0.402344	1239	0.87748	0.015953	0.255215	0.951976	NA	-0.0387724	0.613295	0.985816	NA	16	79076699	A	G	0.4765	ENST00000410312	uc059xla.1	79264453	+
7953934	RN7SKP161	rs11052877	0.402501	1240	0.87748	-0.0125115	0.920253	0.998203	NA	0.00248313	0.428727	0.974744	NA	12	9753094	G	A	0.3882	ENST00000411110	uc058lbu.1	10084185	+
8137865	GNA12	rs1843938	0.402779	1241	0.87748	-0.0103852	0.360731	0.968985	NA	0.0210853	0.352885	0.970201	NA	7	3073400	A	G	0.4324	NM_001282440	uc032zbv.2	2763140	-
7931899	IL15RA	rs3118470	0.40311	1242	0.87748	-0.0107174	0.763242	0.99578	NA	-0.00691356	0.920383	0.999408	NA	10	6059750	G	A	0.3294	NM_001243539	uc001iiw.4	5978187	-
7917707	EVI5	rs41286801	0.403705	1243	0.87748	0.0136285	0.0250542	0.908035	NA	-0.0495068	0.290266	0.962732	NA	1	92509907	A	G	0.1941	NM_005665	uc001dox.3	92792404	-
8129872	OLIG3	rs17066096	0.403781	1244	0.87748	0.0145799	0.899226	0.998203	NA	-0.00356254	0.081321	0.944376	NA	6	137131771	G	A	0.2735	NM_175747	uc003qhp.2	137494250	-
7956417	RNU6-879P	rs201202118	0.404992	1245	0.87748	0.0127165	0.784696	0.996634	NA	-0.00657696	0.991614	0.999548	NA	12	57788279	A	T	0.6964	ENST00000364328	uc058pvk.1	57415295	+
8130528	RSPH3	rs1738074	0.405046	1246	0.87748	0.0111148	0.686594	0.995524	NA	-0.00973131	0.782916	0.998254	NA	6	159044945	G	A	0.6147	NM_031924	uc063soj.1	159000166	-
7918913	IGSF3	rs2300747	0.405056	1247	0.87748	-0.0147498	0.0739487	0.908035	NA	0.0439384	0.098101	0.944376	NA	1	116561593	A	G	0.8676	NM_001007237	uc001egr.3	116667753	-
7964466	DCTN2	rs12368653	0.405192	1248	0.87748	0.00640046	0.0131505	0.908035	NA	-0.0353062	0.325969	0.962732	NA	12	57739473	A	G	0.4765	NM_001261412	uc058pyo.1	57547172	-
8034021	CDC37	rs2288904	0.405199	1249	0.87748	0.00754389	0.661441	0.99462	NA	-0.00552749	0.80548	0.998254	NA	19	10631494	G	A	0.7882	NM_007065	uc002mof.2	10403533	-
8021442	ZNF532	rs7238078	0.405227	1250	0.87748	-0.0197325	0.0566864	0.908035	NA	0.0697352	0.903913	0.999408	NA	18	58716960	A	C	0.7824	NM_018181	uc002lho.4	58862599	+
7953936	TMEM52B	rs10466829	0.405288	1251	0.87748	0.0123294	0.618485	0.99462	NA	0.0120284	0.256056	0.962732	NA	12	9723495	A	G	0.5147	NM_001079815	uc031yuk.2	10170541	+
8138770	HOXA13	rs706015	0.40534	1252	0.87748	-0.0108518	0.526894	0.975333	NA	0.0129884	0.878072	0.999408	NA	7	26975369	C	A	0.1824	NM_000522	uc003szb.2	27200106	-
8073992	PANX2	rs470119	0.40577	1253	0.87748	-0.00820153	0.812175	0.998203	NA	-0.00397015	0.91031	0.999408	NA	22	50528485	A	G	0.3882	NM_001160300	uc003bjo.5	50170730	+
8021707	SOCS6	rs763361	0.405887	1254	0.87748	0.0132275	0.170801	0.942254	NA	0.0387251	0.363488	0.970201	NA	18	69864406	T	C	0.4912	NM_004232	uc002lkr.2	70288900	+
7928630	EIF5AL1	rs1250542	0.407951	1255	0.879546	0.00693984	0.662381	0.99462	NA	-0.005589	0.62676	0.985816	NA	10	79274913	A	G	0.3946	NM_001099692	uc009xrx.4	79512600	+
7999478	TXNDC11	rs6498184	0.408181	1256	0.879546	-0.00727944	0.278693	0.951976	NA	-0.0153313	0.679715	0.99142	NA	16	11342133	G	A	0.8235	NM_015914	uc002dbg.2	11742878	-
8034101	TMED1	rs8112449	0.408541	1257	0.879546	-0.0080902	0.890767	0.998203	NA	0.00244211	0.720215	0.998254	NA	19	10409388	G	A	0.6353	NM_006858	uc002mpy.5	10836290	-
8017186	HEATR6	rs8070345	0.40893	1258	0.879546	-0.00996772	0.272185	0.951976	NA	0.0278169	0.213232	0.962732	NA	17	59739396	A	G	0.5059	NM_022070	uc002iyk.2	60078931	-
8033162	KHSRP	rs1077667	0.408976	1259	0.879546	0.00894352	0.11099	0.929176	NA	-0.0259512	0.559129	0.977303	NA	19	6668961	G	A	0.7941	NM_003685	uc002mer.5	6424794	-
7940377	TMEM132A	rs34383631	0.409372	1260	0.879546	-0.00682221	0.0424402	0.908035	NA	-0.0285047	0.0847978	0.944376	NA	11	61025858	A	G	0.4676	NM_017870	uc001nqi.4	60924480	+
8081997	FBXO40	rs1920296	0.409479	1261	0.879546	-0.0133214	0.57381	0.99462	NA	0.0143296	0.998815	0.999691	NA	3	121824730	C	A	0.6088	NM_016298	uc003eeg.3	121593118	+
8033960	FDX1L	rs34536443	0.409585	1262	0.879546	-0.0242938	0.452988	0.968985	NA	0.0145051	0.29021	0.962732	NA	19	10352442	C	G	0.97041	NM_001031734	uc002mny.3	10316015	-
7918034	DPH5	rs12027668	0.409763	1263	0.879546	-0.0110509	0.150465	0.935905	NA	-0.035099	0.573401	0.977379	NA	1	100865428	G	A	0.429	NM_001077394	uc001dtw.4; uc057ire.1; uc001dts.4; uc001dtz.4; uc057irf.1; uc057irg.1; uc057irh.1; uc057iri.1; uc001dtr.4; uc057irj.1; uc057irk.1; uc057irl.1; uc001dtt.4; uc057irm.1; uc057iro.1; uc057irp.1	101025762; 101021720; 101025772; 101026088; 100995150; 101025351; 101025775; 101025815; 101025763; 101025771; 101025761; 101025755; 101025767; 101025815; 101025753; 101025787	-
8007043	RAPGEFL1	rs12946510	0.41128	1264	0.880187	-0.0128752	0.22156	0.942254	NA	0.0353998	0.0443587	0.944376	NA	17	39756124	A	G	0.4912	NM_016339	uc060exn.1	40177094	+
8074106	KLHDC7B	rs470119	0.41149	1265	0.880187	-0.012032	0.981244	0.999431	NA	-0.000538397	0.105729	0.944376	NA	22	50528485	A	G	0.3882	NM_138433	uc003bmi.3	50548032	+
8027006	SSBP4	rs874628	0.411662	1266	0.880187	0.00812047	0.455355	0.968985	NA	0.0141306	0.715144	0.998254	NA	19	18193890	A	G	0.7	NM_001009998	uc002niz.3	18419335	+
7968972	COX17	rs1131265	0.411754	1267	0.880187	0.0123738	0.30221	0.961895	NA	0.0223269	0.234646	0.962732	NA	3	119503609	C	G	0.8491	NM_005694	uc003ecz.2	119677403	-
8025058	TRIP10	rs1077667	0.412376	1268	0.880187	0.0141943	0.523934	0.975333	NA	-0.0158226	0.887221	0.999408	NA	19	6668961	G	A	0.7941	NM_001288962	uc002mfs.5	6739726	+
7985924	ZNF710	rs8042861	0.412519	1269	0.880187	0.00718597	0.815358	0.998203	NA	0.0041458	0.253699	0.962732	NA	15	90434101	A	C	0.4588	NM_198526	uc002bov.3	90001391	+
7923221	DDX59	rs12122721	0.412631	1270	0.880187	-0.0146913	0.681037	0.99462	NA	-0.0115581	0.325298	0.962732	NA	1	201015352	G	A	0.7029	NM_001031725	uc009wzk.4	200669969	-
8089911	HCLS1	rs1920296	0.413842	1271	0.880187	-0.00745297	0.43982	0.968985	NA	-0.0127599	0.3523	0.970201	NA	3	121824730	C	A	0.6088	NM_005335	uc003eeh.5	121660911	-
7960594	CHD4	rs12296430	0.413918	1272	0.880187	-0.00670222	0.871903	0.998203	NA	0.00205898	0.0917095	0.944376	NA	12	6394334	C	G	0.2235	ENST00000544484	uc001qpp.4	6607368	-
7977018	TRAF3	rs12148050	0.414036	1273	0.880187	-0.00833554	0.0992716	0.929176	NA	0.0300563	0.324327	0.962732	NA	14	102797451	A	G	0.3441	NM_003300	uc059fnw.1; uc059foa.1; uc059fnz.1; uc059fob.1; uc010txy.3; uc059fnx.1; uc001ymc.3; uc001yme.3; uc001ymd.3	102777617; 102875674; 102871926; 102875686; 102777601; 102830353; 102777556; 102777478; 102777475	+
7917359	ZNHIT6	rs12087340	0.414262	1274	0.880187	-0.0239444	0.0908959	0.924008	NA	0.0456388	0.51496	0.974744	NA	1	85281310	A	G	0.07647	NM_001170670	uc010osc.2	85708433	-
8083739	MIR16-2	rs4680534	0.414373	1275	0.880187	0.0156875	0.509806	0.972686	NA	0.0206399	0.807805	0.998254	NA	3	159981157	C	T	0.3882	NR_029525	uc003fdk.3	160404744	+
7996860	TANGO6	rs1886700	0.414555	1276	0.880187	-0.0114759	0.222812	0.942254	NA	-0.0220708	0.865176	0.999408	NA	16	68652002	A	G	0.1382	NM_024562	uc002ewi.5	68843605	+
8025697	ILF3	rs34536443	0.414607	1277	0.880187	-0.0156298	0.892497	0.998203	NA	0.00168742	0.464152	0.974744	NA	19	10352442	C	G	0.97041	NM_001137673	uc002mpm.3	10654327	+
7921571	PEX19	rs35967351	0.415434	1278	0.880462	0.00769014	0.425723	0.968985	NA	0.0132666	0.0331437	0.907602	NA	1	160742014	A	T	0.6706	NM_001193644	uc001fvs.3; uc057mjs.1; uc057mjt.1; uc057mju.1; uc057mjv.1; uc057mjw.1; uc057mjx.1; uc057mjy.1; uc057mjz.1; uc057mka.1; uc057mkb.1; uc057mkc.1	160285146; 160285154; 160280082; 160285096; 160282144; 160284223; 160285146; 160284231; 160282519; 160286348; 160285133; 160285141	-
8081989	ARGFX	rs1920296	0.415563	1279	0.880462	-0.0165295	0.0422809	0.908035	NA	0.0717363	0.0308567	0.907602	NA	3	121824730	C	A	0.6088	NM_001012659	uc062myc.1	121570703	+
8050761	RNA5SP88	rs4665719	0.41594	1280	0.880462	0.0147719	0.0522881	0.908035	NA	0.0589856	0.838516	0.998254	NA	2	24794991	G	A	0.2412	ENST00000365560	uc061hda.1	24564738	-
8108050	TCF7	rs756699	0.416035	1281	0.880462	-0.0177988	0.354251	0.968985	NA	0.0272279	0.325592	0.962732	NA	5	134110884	A	G	0.8757	NM_001134851	uc003kyu.3	134115624	+
7904281	C1orf137	rs6677309	0.417844	1282	0.883601	-0.0163775	0.449602	0.968985	NA	-0.0192547	0.210025	0.962732	NA	1	116537544	A	C	0.8728	NM_001013643	uc031una.2	116694111	+
7921583	COPA	rs35967351	0.418782	1283	0.884892	-0.00536185	0.487922	0.968985	NA	0.00836589	0.000129304	0.116848	NA	1	160742014	A	T	0.6706	NM_001098398	uc001fvv.5	160343248	-
8139622	ZPBP	rs201847125	0.419796	1284	0.886344	0.014923	0.434507	0.968985	NA	0.0235705	0.024448	0.907602	NA	7	50285971	G	A	0.7012	NM_001159878	uc010kyw.4	50093236	-
7944285	ARCN1	rs523604	0.420588	1285	0.887245	0.00682851	0.788537	0.996634	NA	0.00405354	0.282478	0.962732	NA	11	118885029	A	G	0.5353	NM_001655	uc001ptq.4	118572452	+
7903393	S1PR1	rs12027668	0.421407	1286	0.887245	0.015113	0.680989	0.99462	NA	-0.0133842	0.118355	0.944376	NA	1	100865428	G	A	0.429	NM_001400	uc001dud.3	101236887	+
8123080	SYTL3	rs1738074	0.421895	1287	0.887245	-0.0112034	0.451968	0.968985	NA	-0.0195102	0.886836	0.999408	NA	6	159044945	G	A	0.6147	NM_001009991	uc003qrp.3; uc003qrs.3; uc003qrr.3; uc063snw.1; uc063snx.1	158650013; 158650013; 158650013; 158650052; 158661318	+
7904303	CD101	rs2300747	0.422117	1288	0.887245	-0.0507363	0.739193	0.99578	NA	-0.025531	0.326658	0.962732	NA	1	116561593	A	G	0.8676	NM_001256106	uc057jsu.1; uc010oxc.3; uc057jsx.1; uc057jsy.1	117001749; 117001811; 117032943; 117034046	+
7961067	RNU6-700P	rs10466829	0.422176	1289	0.887245	0.013618	0.937097	0.998203	NA	0.00227482	0.378689	0.971438	NA	12	9723495	A	G	0.5147	ENST00000391043	uc058lae.1	9624228	-
7953914	CLEC12B	rs10466829	0.422466	1290	0.887245	-0.0239434	0.990488	0.999431	NA	-0.000673245	0.889471	0.999408	NA	12	9723495	A	G	0.5147	NM_001129998	uc001qwz.3	10010631	+
7934753	EIF5AL1	rs1782645	0.422723	1291	0.887245	0.00576753	0.71915	0.99578	NA	-0.00456895	0.810395	0.998254	NA	10	79288854	A	G	0.4441	NM_001099692	uc009xrx.4	79512600	+
8063074	ZSWIM1	rs4810485	0.422906	1292	0.887245	0.00912174	0.14734	0.935905	NA	0.029677	0.0976841	0.944376	NA	20	46119308	A	C	0.2706	NM_080603	uc010ghi.4	45881226	+
7952227	C1QTNF5	rs523604	0.423168	1293	0.887245	0.00612572	0.435256	0.968985	NA	-0.0110611	0.998796	0.999691	NA	11	118885029	A	G	0.5353	NM_015645	uc058iiv.2	119340883	-
8030277	CD37	rs2303759	0.423669	1294	0.88761	-0.00533765	0.440236	0.968985	NA	0.0093816	0.934415	0.999408	NA	19	49365794	C	A	0.2692	NM_001040031	uc002pne.4	49335395	+
8035435	KIAA1683	rs11554159	0.425385	1295	0.887943	-0.00909672	0.301872	0.961895	NA	-0.0228851	0.3934	0.974744	NA	19	18175134	G	A	0.7235	NM_001145304	uc010ebn.3	18274509	-
8015460	ACLY	rs2293152	0.425515	1296	0.887943	0.00530412	0.887112	0.998203	NA	0.0017595	0.184133	0.962732	NA	17	42329511	C	G	0.6235	NM_001096	uc002hyg.4; uc060fek.1; uc002hyh.4; uc010wfy.3; uc060fel.1; uc060fen.1; uc060feo.1; uc060fep.1; uc060feq.1; uc060fer.1	41918987; 41918962; 41919019; 41918983; 41919022; 41870719; 41918951; 41905641; 41918951; 41930542	-
8026861	B3GNT3	rs874628	0.425651	1297	0.887943	-0.00826266	0.990394	0.999431	NA	-0.000248874	0.0754038	0.944376	NA	19	18193890	A	G	0.7	NM_014256	uc002nhl.2	17795109	+
8071559	SDF2L1	rs2283792	0.425811	1298	0.887943	0.00963997	0.904356	0.998203	NA	0.0027526	0.722095	0.998254	NA	22	21776836	C	A	0.5	NM_022044	uc002zvf.4	21642260	+
8007197	NKIRAS2	rs744166	0.426135	1299	0.887943	0.00618411	0.904725	0.998203	NA	-0.00146553	0.988208	0.999408	NA	17	42362183	G	A	0.3971	NM_001001349	uc002hyq.4	42017019	+
7944331	RNU6-376P	rs523604	0.426242	1300	0.887943	0.0175137	0.75779	0.99578	NA	-0.0120031	0.861309	0.999383	NA	11	118885029	A	G	0.5353	ENST00000384731	uc058ibf.1	118702341	+
8063011	WFDC10A	rs6074022	0.426691	1301	0.887943	0.0135583	0.490166	0.968985	NA	-0.0199228	0.779147	0.998254	NA	20	46111557	C	T	0.2735	NM_080753	uc002xoz.4	45629525	+
7934753	EIF5AL1	rs1250542	0.427453	1302	0.887943	0.00665419	0.71395	0.995524	NA	-0.00472518	0.499812	0.974744	NA	10	79274913	A	G	0.3946	NM_001099692	uc009xrx.4	79512600	+
7959473	DENR	rs7132277	0.427769	1303	0.887943	-0.013851	0.414229	0.968985	NA	-0.0203578	0.645053	0.985816	NA	12	123108835	A	G	0.1941	AB014731	uc001uda.4; uc058uoh.1; uc058uoi.1; uc058uoj.1	122752773; 122752823; 122752826; 122752846	+
8030383	RCN3	rs8107548	0.428965	1304	0.887943	0.0122398	0.661058	0.99462	NA	0.0127299	0.77382	0.998254	NA	19	49367386	G	A	0.2647	NM_020650	uc002poj.4	49527617	+
8016366	MRPL10	rs4794058	0.429025	1305	0.887943	0.00998372	0.176426	0.942254	NA	-0.0306428	0.209158	0.962732	NA	17	47519732	A	G	0.503	NM_145255	uc002ilz.4	47831517	-
8016371	SCRN2	rs4794058	0.429129	1306	0.887943	-0.00757108	0.343058	0.968985	NA	-0.017226	0.153942	0.952715	NA	17	47519732	A	G	0.503	NM_001145023	uc002imf.4	47841289	-
8063347	RN7SL197P	rs17785991	0.429712	1307	0.887943	0.0141948	0.207397	0.942254	NA	-0.0379504	0.646208	0.985816	NA	20	49822224	A	T	0.3265	ENST00000466981	uc061xqm.1	49721948	+
8066579	WFDC3	rs4810485	0.429806	1308	0.887943	0.0135193	0.159068	0.935905	NA	-0.0396662	0.144058	0.952715	NA	20	46119308	A	C	0.2706	NM_080614	uc002xpf.1	45791908	-
8129872	OLIG3	rs7769192	0.430336	1309	0.887943	0.0120915	0.953533	0.998203	NA	-0.00168683	0.0974513	0.944376	NA	6	137641518	G	A	0.5	NM_175747	uc003qhp.2	137494250	-
7953351	NCAPD2	rs12296430	0.430477	1310	0.887943	0.0136195	0.854279	0.998203	NA	0.00514759	0.866731	0.999408	NA	12	6394334	C	G	0.2235	NM_014865	uc001qoo.3	6493378	+
7999433	NA	rs7191700	0.430527	1311	0.887943	-0.0105131	0.431215	0.968985	NA	0.0193557	0.255987	0.962732	NA	16	11312946	C	T	0.6627	NA	uc059qus.1	11274236	-
7953395	COPS7A	rs12296430	0.430648	1312	0.887943	0.00761785	0.0756185	0.908035	NA	-0.0283227	0.495572	0.974744	NA	12	6394334	C	G	0.2235	NM_001164093	uc001qqn.5	6724286	+
7975787	JDP2	rs4903324	0.430772	1313	0.887943	-0.0154015	0.753171	0.99578	NA	0.00790792	0.848756	0.998254	NA	14	75495168	A	G	0.2088	NM_001135047	uc010asj.4	75427715	+
7967463	RILPL1	rs949143	0.432127	1314	0.887943	0.0146025	0.241035	0.942651	NA	-0.0385148	0.319861	0.962732	NA	12	123110616	G	A	0.3176	NM_178314	uc001ufe.3	123533718	-
7967325	HCAR1	rs1790100	0.432794	1315	0.887943	0.0145061	0.0611663	0.908035	NA	-0.051034	0.16994	0.962732	NA	12	123172178	G	T	0.2324	NM_032554	uc001ucz.4	122730843	-
7968972	COX17	rs1132200	0.433487	1316	0.887943	0.0124304	0.291958	0.954763	NA	0.0227872	0.538932	0.974744	NA	3	119431989	C	T	0.8706	NM_005694	uc003ecz.2	119677403	-
7998434	TPSAB1	rs2744148	0.433961	1317	0.887943	0.00991035	0.809584	0.998203	NA	0.00423967	0.611789	0.985816	NA	16	1023552	G	A	0.1559	NM_003294	uc002ckz.4	1240695	+
7940486	SDHAF2	rs34383631	0.434188	1318	0.887943	0.00651027	0.758967	0.99578	NA	-0.00436335	0.0552611	0.944376	NA	11	61025858	A	G	0.4676	NM_017841	uc001nrt.4	61430072	+
8122256	SLC35D3	rs17066096	0.434408	1319	0.887943	0.0133499	0.551194	0.988938	NA	-0.0163882	0.659426	0.986048	NA	6	137131771	G	A	0.2735	NM_001008783	uc003qhe.4	136922263	+
8119078	RN7SL748P	rs941816	0.434443	1320	0.887943	-0.0162913	0.704566	0.995524	NA	0.0129139	0.394956	0.974744	NA	6	36407527	G	A	0.1912	ENST00000483066	uc063oeh.1	36522190	+
8034075	CDKN2D	rs34536443	0.434912	1321	0.887943	-0.0241267	0.329576	0.968985	NA	-0.0197731	0.841973	0.998254	NA	19	10352442	C	G	0.97041	NM_001800	uc002mpa.4; uc002mpb.4	10568978; 10569059	-
8015545	RAB5C	rs9891119	0.435107	1322	0.887943	-0.00584184	0.675014	0.99462	NA	0.00499848	0.336701	0.962732	NA	17	42355962	C	A	0.3265	NM_001252039	uc010cxx.4	42154988	-
8015545	RAB5C	rs4796791	0.435107	1323	0.887943	-0.00584184	0.675014	0.99462	NA	0.00499848	0.336701	0.962732	NA	17	42378745	A	G	0.3265	NM_001252039	uc010cxx.4	42154988	-
7998374	GNG13	rs2744148	0.436064	1324	0.887943	0.0118981	0.90516	0.998203	NA	0.00243897	0.4186	0.974744	NA	16	1023552	G	A	0.1559	NM_016541	uc002ckh.4	800733	-
8016324	CDC27	rs4794058	0.436777	1325	0.887943	0.00863682	0.0410083	0.908035	NA	0.0423871	0.859495	0.999383	NA	17	47519732	A	G	0.503	NM_001114091	uc002ile.5	47189176	-
7940409	CD5	rs650258	0.436897	1326	0.887943	0.0128132	0.25477	0.951976	NA	-0.0354619	0.845005	0.998254	NA	11	61064810	G	A	0.65	NM_014207	uc009ynk.4	61102394	+
8138721	HOXA3	rs706015	0.436927	1327	0.887943	-0.0123533	0.484828	0.968985	NA	-0.0166926	0.919323	0.999408	NA	7	26975369	C	A	0.1824	NM_030661	uc011jzl.3	27119595	-
8007427	AOC3	rs9891119	0.437231	1328	0.887943	0.0140682	0.218672	0.942254	NA	-0.034641	0.0961946	0.944376	NA	17	42355962	C	A	0.3265	NM_001277731	uc031rao.3	42851183	+
8007427	AOC3	rs4796791	0.437231	1329	0.887943	0.0140682	0.218672	0.942254	NA	-0.034641	0.0961946	0.944376	NA	17	42378745	A	G	0.3265	NM_001277731	uc031rao.3	42851183	+
8066559	WFDC9	rs4810485	0.438131	1330	0.887943	0.0182555	0.392038	0.968985	NA	0.0348563	0.154887	0.952715	NA	20	46119308	A	C	0.2706	NM_147198	uc002xoy.3	45631268	-
7928602	SFTPA1	rs1250542	0.438569	1331	0.887943	0.00891071	0.082177	0.908035	NA	-0.0352373	0.985956	0.999408	NA	10	79274913	A	G	0.3946	NM_001093770	uc057ull.1; uc057ulj.1; uc057ulk.1; uc001kap.4; uc001kar.4; uc009xry.4	79610960; 79610952; 79610954; 79610938; 79610938; 79610944	+
7928632	SFTPA1	rs1250542	0.438569	1332	0.887943	0.00891071	0.082177	0.908035	NA	-0.0352373	0.985956	0.999408	NA	10	79274913	A	G	0.3946	NM_001093770	uc057ull.1; uc057ulj.1; uc057ulk.1; uc001kap.4; uc001kar.4; uc009xry.4	79610960; 79610952; 79610954; 79610938; 79610938; 79610944	+
8000906	ZNF764	rs7204270	0.438767	1333	0.887943	-0.00911525	0.0450253	0.908035	NA	0.0417104	0.712171	0.998254	NA	16	30145642	G	A	0.5265	NM_001172679	uc002dyr.3	30558498	-
8121936	C6orf58	rs802734	0.438809	1334	0.887943	0.0125561	0.555653	0.992595	NA	-0.0146438	0.97829	0.999408	NA	6	127957653	A	G	0.7147	NM_001010905	uc003qbh.5	127577173	+
7919047	RNU1-75P	rs666930	0.439156	1335	0.887943	-0.0140041	0.121859	0.930133	NA	-0.0507662	0.0260284	0.907602	NA	1	119716347	G	A	0.5588	ENST00000347264	uc057jvf.1	119331525	-
7952129	RPS25	rs523604	0.439169	1336	0.887943	-0.00467769	0.627282	0.99462	NA	-0.00609414	0.997841	0.999691	NA	11	118885029	A	G	0.5353	NM_001028	uc001pun.4	119018690	-
7929322	CYP26A1	rs7923837	0.439757	1337	0.887943	-0.00994362	0.0910034	0.924008	NA	-0.0372627	0.546689	0.974744	NA	10	92722160	G	A	0.6471	NM_000783	uc001kil.3	93073889	+
7959621	NA	rs1790100	0.440083	1338	0.887943	-0.0139948	0.287747	0.951976	NA	0.0301891	0.805064	0.998254	NA	12	123172178	G	T	0.2324	NA	uc058uua.1	123616707	+
8035465	ISYNA1	rs11554159	0.440195	1339	0.887943	0.0095803	0.678017	0.99462	NA	-0.00951625	0.462754	0.974744	NA	19	18175134	G	A	0.7235	NM_001170938	uc002nje.3	18438167	-
8030339	FLT3LG	rs8107548	0.440568	1340	0.887943	-0.00726416	0.675697	0.99462	NA	-0.00740863	0.0243627	0.907602	NA	19	49367386	G	A	0.2647	NM_001204502	uc061bdo.1; uc061bdp.1; uc002pnu.4; uc002pnv.4; uc061bdq.1; uc010yau.3; uc002pnx.3; uc061bdr.1; uc061bdt.1; uc061bdu.1; uc061bdv.1; uc061bdw.1	49474206; 49474227; 49474233; 49474235; 49474235; 49474251; 49474560; 49474582; 49474601; 49475779; 49476108; 49478916	+
8030292	DKKL1	rs2303759	0.440834	1341	0.887943	-0.0130977	0.983767	0.999431	NA	-0.000654871	0.908495	0.999408	NA	19	49365794	C	A	0.2692	NM_001197301	uc061bbq.1	49363933	+
8026895	CCDC124	rs874628	0.44086	1342	0.887943	-0.00671766	0.201153	0.942254	NA	-0.0225568	0.962075	0.999408	NA	19	18193890	A	G	0.7	NM_001136203	uc010xpz.3	17933015	+
7897509	NMNAT1	rs10492972	0.440926	1343	0.887943	0.0143158	0.966191	0.998203	NA	0.00122011	0.841851	0.998254	NA	1	10293054	C	T	0.3006	NM_022787	uc001aqp.3	9943427	+
8015607	STAT3	rs744166	0.441207	1344	0.887943	-0.00545773	0.350841	0.968985	NA	0.0112964	0.89971	0.999408	NA	17	42362183	G	A	0.3971	NM_003150	uc002hzm.2	42388414	-
7921625	SLAMF6	rs35967351	0.441905	1345	0.887943	0.0253142	0.20605	0.942254	NA	-0.0702259	0.652521	0.985816	NA	1	160742014	A	T	0.6706	ENST00000368055	uc010pji.3	160523242	-
8026989	RN7SL513P	rs874628	0.44281	1346	0.887943	-0.0133946	0.14798	0.935905	NA	0.0521404	0.314599	0.962732	NA	19	18193890	A	G	0.7	ENST00000465715	uc060vpx.1	18333275	+
8058108	TYW5	rs281783	0.443062	1347	0.887943	0.0120618	0.379273	0.968985	NA	0.0199276	0.433193	0.974744	NA	2	199886859	A	G	0.8118	NM_001039693	uc002uvi.5	199955736	-
8042402	APLF	rs7592330	0.443143	1348	0.887943	-0.0119011	0.888633	0.998203	NA	-0.00392619	0.59799	0.985816	NA	2	68419651	A	G	0.5853	NM_173545	uc002sep.4	68467560	+
8042402	APLF	rs7595037	0.443143	1349	0.887943	-0.0119011	0.888633	0.998203	NA	-0.00392619	0.59799	0.985816	NA	2	68419963	A	G	0.5824	NM_173545	uc002sep.4	68467560	+
7928630	EIF5AL1	rs1782645	0.443723	1350	0.887943	0.00550939	0.658893	0.99462	NA	-0.00560596	0.971743	0.999408	NA	10	79288854	A	G	0.4441	NM_001099692	uc009xrx.4	79512600	+
8064108	C20orf195	rs2256814	0.444838	1351	0.887943	0.00982582	0.719096	0.99578	NA	-0.00731485	0.503639	0.974744	NA	20	63742630	A	G	0.2088	XM_005260231	uc061ynl.1; uc061ynm.1; uc002yfj.4; uc061ynn.1	63547890; 63553714; 63553019; 63554142	+
8143702	ZNF425	rs354033	0.445062	1352	0.887943	-0.0101345	0.426589	0.968985	NA	-0.0179112	0.464032	0.974744	NA	7	149592373	G	A	0.7265	NM_001001661	uc003wfj.4	149126346	-
8051814	ZFP36L2	rs12466022	0.445254	1353	0.887943	-0.0133244	0.283992	0.951976	NA	0.0275258	0.24089	0.962732	NA	2	43131922	C	A	0.7147	NM_006887	uc002rsv.5	43226609	-
8063097	PCIF1	rs4810485	0.446312	1354	0.887943	0.00562859	0.584679	0.99462	NA	-0.00692839	0.510314	0.974744	NA	20	46119308	A	C	0.2706	NM_022104	uc002xqs.4	45934627	+
8008074	CDK5RAP3	rs4239162	0.446347	1355	0.887943	-0.00817427	0.275427	0.951976	NA	-0.0217773	0.861769	0.999383	NA	17	47678444	G	A	0.5059	NM_001278197	uc010wlc.4	47970533	+
7908409	RGS2	rs2760524	0.446493	1356	0.887943	-0.0110748	0.847535	0.998203	NA	0.00391311	0.969137	0.999408	NA	1	192561418	G	A	0.8412	ENST00000464302	uc057obd.1	192809041	+
7908409	RGS2	rs1323292	0.446493	1357	0.887943	-0.0110748	0.847535	0.998203	NA	0.00391311	0.969137	0.999408	NA	1	192571891	A	G	0.8412	ENST00000464302	uc057obd.1	192809041	+
7947934	MTCH2	rs7120737	0.446562	1358	0.887943	0.0105534	0.587044	0.99462	NA	0.00990452	0.639842	0.985816	NA	11	47680843	G	A	0.1324	NM_014342	uc010rho.3	47642623	-
7948574	CPSF7	rs34383631	0.446616	1359	0.887943	-0.00629521	0.498358	0.972686	NA	-0.00960293	0.608235	0.985816	NA	11	61025858	A	G	0.4676	NM_001136040	uc001nrq.4	61430031	-
7981383	RN7SL546P	rs12148050	0.446909	1360	0.887943	0.0189292	0.957596	0.998203	NA	-0.00211215	0.677157	0.991086	NA	14	102797451	A	G	0.3441	ENST00000479428	uc059fnp.1	102583177	-
8086057	UBP1	rs28723576	0.446983	1361	0.887943	-0.00629091	0.407876	0.968985	NA	0.0117745	0.877418	0.999408	NA	3	32936460	A	G	0.5414	NM_001128160	uc003cfr.6	33440010	-
7967322	HCAR3	rs949143	0.447029	1362	0.887943	0.0271306	0.288702	0.951976	NA	0.072293	0.163275	0.957749	NA	12	123110616	G	A	0.3176	NM_006018	uc001ucy.4	122716892	-
7911730	PANK4	rs4648356	0.447509	1363	0.887943	0.00756716	0.791867	0.996635	NA	0.00436547	0.227707	0.962732	NA	1	2792599	C	A	0.6716	NM_018216	uc001ajm.3	2526628	-
8014956	NR1D1	rs12946510	0.447656	1364	0.887943	0.0158498	0.549825	0.988938	NA	0.0222809	0.568024	0.977379	NA	17	39756124	A	G	0.4912	NM_021724	uc002htz.4	40100725	-
7947926	RNU5E-10P	rs7120737	0.447769	1365	0.887943	0.019756	0.0890285	0.917704	NA	-0.0567393	0.292615	0.962732	NA	11	47680843	G	A	0.1324	ENST00000363506	uc058bgd.1	47576588	-
8063028	DNTTIP1	rs6074022	0.44804	1366	0.887943	-0.00850815	0.382539	0.968985	NA	0.0167436	0.362153	0.970201	NA	20	46111557	C	T	0.2735	NM_052951	uc002xpk.3	45791936	+
8042115	RN7SL361P	rs842639	0.44827	1367	0.887943	-0.0157134	0.216166	0.942254	NA	-0.0458675	0.334497	0.962732	NA	2	60868110	A	G	0.6294	ENST00000470785	uc061jlc.1	60640704	+
8063097	PCIF1	rs6074022	0.44839	1368	0.887943	0.00550639	0.588769	0.99462	NA	-0.00676243	0.522067	0.974744	NA	20	46111557	C	T	0.2735	NM_022104	uc002xqs.4	45934627	+
7944195	UBE4A	rs533646	0.449264	1369	0.887943	-0.00636572	0.43205	0.968985	NA	0.0112693	0.435404	0.974744	NA	11	118696037	G	C	0.6607	NM_001204077	uc001psw.4	118359584	+
7964522	CDK4	rs12368653	0.449332	1370	0.887943	-0.00661737	0.856833	0.998203	NA	0.00308924	0.705665	0.998254	NA	12	57739473	A	G	0.4765	NM_000075	uc001spv.4	57752521	-
8003204	GINS2	rs13333054	0.450632	1371	0.887943	-0.0145115	0.941123	0.998203	NA	-0.00222551	0.843572	0.998254	NA	16	85977427	A	G	0.2235	NM_016095	uc002fja.4	85688999	-
8015685	EZH1	rs2293152	0.450928	1372	0.887943	0.00780726	0.030515	0.908035	NA	0.0377504	0.50059	0.974744	NA	17	42329511	C	G	0.6235	NM_001991	uc002iaz.4	42745030	-
7964413	R3HDM2	rs703842	0.451347	1373	0.887943	0.00610079	0.68353	0.994659	NA	0.00595781	0.0330724	0.907602	NA	12	57768956	A	G	0.6882	NM_014925	uc009zpm.1	57310463	-
8067743	ZBTB46	rs6062314	0.451393	1374	0.887943	0.0133252	0.211368	0.942254	NA	0.0239393	0.110111	0.944376	NA	20	63778360	A	G	0.91471	NM_025224	uc061ypr.1	63790923	-
7923319	TMEM9	rs7522462	0.451456	1375	0.887943	0.0104153	0.440659	0.968985	NA	-0.0173228	0.984537	0.999408	NA	1	200912467	G	A	0.7176	NM_001288564	uc001gwa.5	201171574	-
8030525	PTOV1	rs2303759	0.451867	1376	0.887943	0.00555279	0.846553	0.998203	NA	-0.00278778	0.522502	0.974744	NA	19	49365794	C	A	0.2692	NM_017432	uc002pqf.2	49851158	+
8071547	UBE2L3	rs2283792	0.451974	1377	0.887943	-0.00847037	0.86812	0.998203	NA	-0.00375843	0.812024	0.998254	NA	22	21776836	C	A	0.5	NM_001256355	uc031rxe.1	21549446	+
8007420	AOC3	rs9891119	0.452567	1378	0.887943	0.0135991	0.107927	0.929176	NA	0.0471532	0.795382	0.998254	NA	17	42355962	C	A	0.3265	NM_001277731	uc031rao.3	42851183	+
8007420	AOC3	rs4796791	0.452567	1379	0.887943	0.0135991	0.107927	0.929176	NA	0.0471532	0.795382	0.998254	NA	17	42378745	A	G	0.3265	NM_001277731	uc031rao.3	42851183	+
8114767	PCDH1	rs35952555	0.452826	1380	0.887943	0.00849602	0.68466	0.995524	NA	-0.00712204	0.326921	0.962732	NA	5	142126991	C	A	0.6029	NM_001278613	uc063icw.1; uc063icx.1; uc063icz.1; uc063icy.1; uc063icv.1; uc003llp.4; uc003llq.4; uc063ida.1	141866202; 141868575; 141868882; 141869589; 141878409; 141878410; 141878410; 141879246	-
8064168	LIME1	rs6062314	0.452835	1381	0.887943	0.011489	0.908207	0.998203	NA	-0.00193617	0.0876909	0.944376	NA	20	63778360	A	G	0.91471	NM_017806	uc002ygp.5	63736642	+
8116086	DOK3	rs4976646	0.452946	1382	0.887943	0.00831207	0.311258	0.968985	NA	-0.0203763	0.691026	0.994886	NA	5	177361569	G	A	0.3095	NM_001144875	uc003mhi.5	177510385	-
7934393	PPP3CB	rs2688608	0.452979	1383	0.887943	-0.00692721	0.238419	0.942254	NA	-0.0210239	0.777514	0.998254	NA	10	73898591	A	C	0.6147	NM_001142353	uc001juf.4	73496024	-
8091735	IFT80	rs4680534	0.453943	1384	0.888836	0.0124541	0.818089	0.998203	NA	-0.0061837	0.351427	0.970201	NA	3	159981157	C	T	0.3882	ENST00000483754	uc062pnb.1; uc003fdb.3; uc003fde.3; uc062pnc.1; uc062pnd.1; uc062pne.1; uc062pnf.1; uc062png.1; uc062pnh.1; uc062pni.1; uc062pnj.1; uc062pnk.1; uc062pnl.1; uc062pnm.1; uc062pnn.1; uc062pno.1; uc062pnp.1; uc062pnq.1; uc062pnr.1; uc062pns.1; uc062pnt.1; uc062pnu.1; uc062pnv.1; uc062pnw.1; uc062pnx.1; uc062pny.1; uc062pnz.1	160399532; 160383656; 160399273; 160399209; 160268761; 160277478; 160307781; 160357499; 160320147; 160399221; 160377454; 160399207; 160399223; 160399544; 160399533; 160399223; 160399216; 160399223; 160399245; 160399216; 160399216; 160399247; 160399215; 160399544; 160399520; 160399247; 160399880	-
7959586	SNRNP35	rs949143	0.45409	1385	0.888836	0.00782997	0.23907	0.942254	NA	-0.0213802	0.347508	0.969371	NA	12	123110616	G	A	0.3176	NM_180699	uc021rfv.3	123459522	+
8052735	CNRIP1	rs7595717	0.455239	1386	0.889306	-0.00741138	0.17511	0.942254	NA	-0.0250881	0.778161	0.998254	NA	2	68360345	A	G	0.2647	NM_001111101	uc002sej.5	68319400	-
7998307	CCDC78	rs2744148	0.455294	1387	0.889306	-0.0119127	0.213398	0.942254	NA	0.028533	0.0983269	0.944376	NA	16	1023552	G	A	0.1559	NM_001031737	uc002cjg.3	726473	-
8066579	WFDC3	rs6074022	0.455314	1388	0.889306	0.0127295	0.15418	0.935905	NA	-0.0395149	0.147593	0.952715	NA	20	46111557	C	T	0.2735	NM_080614	uc002xpf.1	45791908	-
7940333	MS4A15	rs34383631	0.45691	1389	0.890673	-0.00945859	0.535804	0.978945	NA	0.0138306	0.134822	0.948564	NA	11	61025858	A	G	0.4676	NM_001098835	uc009ynf.2	60757007	+
7993248	RMI2	rs12708716	0.457201	1390	0.890673	-0.00955211	0.649244	0.99462	NA	-0.00918066	0.4675	0.974744	NA	16	11086016	A	G	0.6941	NM_152308	uc002daw.2	11345430	+
7944382	VPS11	rs533646	0.457297	1391	0.890673	-0.00692469	0.0988588	0.929176	NA	-0.0279329	0.650352	0.985816	NA	11	118696037	G	C	0.6607	NM_001290185	uc031yhi.2	119067820	+
7992038	METRN	rs2744148	0.457328	1392	0.890673	-0.00923584	0.121738	0.930133	NA	-0.0268048	0.842756	0.998254	NA	16	1023552	G	A	0.1559	NM_024042	uc010bra.4	715114	+
8081880	ADPRH	rs1132200	0.458098	1393	0.891531	0.0158571	0.0847804	0.908035	NA	-0.0485448	0.871061	0.999408	NA	3	119431989	C	T	0.8706	NM_001125	uc003ecs.3	119579675	+
8007388	CNTD1	rs9891119	0.459369	1394	0.892724	-0.0122391	0.346705	0.968985	NA	-0.0263041	0.242841	0.962732	NA	17	42355962	C	A	0.3265	NM_173478	uc002ibm.5	42798791	+
8007388	CNTD1	rs4796791	0.459369	1395	0.892724	-0.0122391	0.346705	0.968985	NA	-0.0263041	0.242841	0.962732	NA	17	42378745	A	G	0.3265	NM_173478	uc002ibm.5	42798791	+
8035494	FKBP8	rs11554159	0.46169	1396	0.894544	-0.00642376	0.165497	0.935905	NA	-0.0242645	0.935225	0.999408	NA	19	18175134	G	A	0.7235	NM_012181	uc060vrp.1	18543577	-
7999396	TEKT5	rs12708716	0.46174	1397	0.894544	0.0114436	0.817984	0.998203	NA	-0.00562608	0.442859	0.974744	NA	16	11086016	A	G	0.6941	NM_144674	uc002czz.2	10694945	-
8038347	TEAD2	rs8107548	0.46197	1398	0.894544	0.00714674	0.450107	0.968985	NA	-0.0140171	0.975856	0.999408	NA	19	49367386	G	A	0.2647	NM_001256658	uc002pnh.5; uc031rls.2; uc002pni.5; uc002pnj.5; uc002png.5; uc010yao.4; uc061bbi.1; uc061bbj.1; uc061bbk.1; uc061bbm.1	49361495; 49362382; 49362407; 49362457; 49360438; 49362441; 49357255; 49357256; 49362441; 49359857	-
8063071	ZSWIM3	rs6074022	0.46223	1399	0.894544	-0.0115604	0.216704	0.942254	NA	-0.0333826	0.399431	0.974744	NA	20	46111557	C	T	0.2735	NM_080752	uc002xqd.4	45857616	+
7959563	C12orf65	rs949143	0.462271	1400	0.894544	0.00776347	0.0812007	0.908035	NA	0.0325283	0.870775	0.999408	NA	12	123110616	G	A	0.3176	ENST00000425637	uc001ueo.4	123233436	+
7953892	KLRF1	rs11052877	0.462286	1401	0.894544	-0.0386761	0.529362	0.975333	NA	-0.047335	0.858318	0.999383	NA	12	9753094	G	A	0.3882	NM_001291822	uc031yub.2	9827480	+
7944302	PHLDB1	rs533646	0.463291	1402	0.89585	0.00967155	0.407441	0.968985	NA	0.0195509	0.981546	0.999408	NA	11	118696037	G	C	0.6607	NM_001144758	uc001pts.3	118607590	+
8030171	FTL	rs2303759	0.464376	1403	0.897148	0.00539999	0.0944563	0.929176	NA	0.0244185	0.545149	0.974744	NA	19	49365794	C	A	0.2692	NM_000146	uc002plo.4	48965300	+
8063028	DNTTIP1	rs4810485	0.464747	1404	0.897148	-0.00824919	0.375904	0.968985	NA	0.0169129	0.361863	0.970201	NA	20	46119308	A	C	0.2706	NM_052951	uc002xpk.3	45791936	+
7999440	PRM1	rs7191700	0.464955	1405	0.897148	-0.00994481	0.0653917	0.908035	NA	0.0477267	0.688249	0.994886	NA	16	11312946	C	T	0.6627	NM_002761	uc002dav.4	11281350	-
7959500	HIP1R	rs1790100	0.466318	1406	0.899138	0.00867448	0.0703837	0.908035	NA	0.0336681	0.328111	0.962732	NA	12	123172178	G	T	0.2324	NM_003959	uc001udj.2	122835425	+
7968331	UBE2L3	rs2283792	0.466742	1407	0.899317	-0.00416636	0.637065	0.99462	NA	-0.00592154	0.872373	0.999408	NA	22	21776836	C	A	0.5	NM_003347	uc002zva.2	21567546	+
8059648	RNY4P19	rs10201872	0.467415	1408	0.899974	0.0261262	0.542107	0.984291	NA	-0.0337637	0.847114	0.998254	NA	2	230242009	A	G	0.1824	ENST00000362530	uc061thw.1	230058324	-
7960654	ING4	rs1800693	0.468976	1409	0.900976	0.00733258	0.767872	0.99578	NA	-0.00535678	0.826706	0.998254	NA	12	6330843	G	A	0.45	NM_001127583	uc001qpx.5	6663101	-
8081997	FBXO40	rs2255214	0.469289	1410	0.900976	-0.009766	0.515499	0.974907	NA	0.0165523	0.18877	0.962732	NA	3	122051692	C	A	0.5147	NM_016298	uc003eeg.3	121593118	+
8033825	COL5A3	rs8112449	0.469417	1411	0.900976	0.00625414	0.439659	0.968985	NA	0.0110515	0.643406	0.985816	NA	19	10409388	G	A	0.6353	NM_015719	uc002mmq.1	10010471	-
8050805	POMC	rs4665719	0.469455	1412	0.900976	-0.0120907	0.0147404	0.908035	NA	-0.0667413	0.0221768	0.907602	NA	2	24794991	G	A	0.2412	NM_000939	uc002rfz.2	25168604	-
8003210	C16orf74	rs35929052	0.470163	1413	0.900976	0.014409	0.17815	0.942254	NA	-0.0332675	0.323691	0.962732	NA	16	85960878	G	A	0.8824	ENST00000602583	uc059xzr.1	85710850	-
8038407	RRAS	rs8107548	0.471012	1414	0.900976	-0.0101974	0.0658685	0.908035	NA	0.0544986	0.165983	0.959447	NA	19	49367386	G	A	0.2647	NM_006270	uc002pop.2	49640201	-
7944447	ABCG4	rs533646	0.471017	1415	0.900976	0.00837575	0.575497	0.99462	NA	-0.0114783	0.9919	0.999548	NA	11	118696037	G	C	0.6607	NM_001142505	uc031yhl.2	119149512	+
8132813	C7orf72	rs201847125	0.47116	1416	0.900976	-0.0105805	0.237929	0.942254	NA	-0.0286315	0.0729171	0.944376	NA	7	50285971	G	A	0.7012	NM_001161834	uc011kcj.3	50096035	+
7906720	FCER1G	rs35967351	0.471249	1417	0.900976	-0.00714543	0.314468	0.968985	NA	0.0180093	0.815745	0.998254	NA	1	160742014	A	T	0.6706	NM_004106	uc001fyz.1	161215296	+
7897236	KCNAB2	rs3007421	0.471711	1418	0.900976	-0.00840086	0.581141	0.99462	NA	-0.0078213	0.443713	0.974744	NA	1	6470129	A	G	0.1294	NM_001199860	uc001alx.3	6034282	+
7948534	DDB1	rs34383631	0.471992	1419	0.900976	0.00463522	0.275407	0.951976	NA	0.0134843	0.407647	0.974744	NA	11	61025858	A	G	0.4676	NM_001923	uc001nrc.6	61333366	-
8066609	SPATA25	rs6074022	0.472345	1420	0.900976	0.0092748	0.838077	0.998203	NA	-0.00459606	0.949368	0.999408	NA	20	46111557	C	T	0.2735	NM_080608	uc002xqf.4	45887635	-
8112159	ANKRD55	rs71624119	0.472433	1421	0.900976	-0.0127626	0.585226	0.99462	NA	0.0156863	0.311019	0.962732	NA	5	56144903	G	A	0.7706	NM_024669	uc003jqu.4	56233359	-
8071642	IGLV6-57	rs2283792	0.472588	1422	0.900976	-0.00976191	0.895131	0.998203	NA	0.00333351	0.290268	0.962732	NA	22	21776836	C	A	0.5	ENST00000390285	uc062cbe.1	22195712	+
8119000	MAPK14	rs941816	0.472926	1423	0.900986	-0.00731946	0.176753	0.942254	NA	0.0215651	0.870399	0.999408	NA	6	36407527	G	A	0.1912	NM_001315	uc003olp.4	36027710	+
7923271	CACNA1S	rs55838263	0.473719	1424	0.901064	0.00974425	0.775549	0.99578	NA	0.00601826	0.661244	0.986643	NA	1	200905600	A	G	0.7118	NM_000069	uc001gvv.4	201112566	-
8067818	NPBWR2	rs6062314	0.473738	1425	0.901064	0.0172377	0.326657	0.968985	NA	0.0275892	0.654449	0.985816	NA	20	63778360	A	G	0.91471	NM_005286	uc011abt.3	64107171	-
7923347	LAD1	rs55838263	0.473964	1426	0.901064	0.0100957	0.875024	0.998203	NA	-0.00358628	0.269365	0.962732	NA	1	200905600	A	G	0.7118	NM_005558	uc001gwm.4	201399608	-
8042416	ARHGAP25	rs7592330	0.475302	1427	0.901326	0.00787834	0.913312	0.998203	NA	0.00218271	0.772807	0.998254	NA	2	68419651	A	G	0.5853	NM_001007231	uc010fdg.4	68734834	+
8042416	ARHGAP25	rs7595037	0.475302	1428	0.901326	0.00787834	0.913312	0.998203	NA	0.00218271	0.772807	0.998254	NA	2	68419963	A	G	0.5824	NM_001007231	uc010fdg.4	68734834	+
7923189	KIF14	rs12122721	0.475481	1429	0.901326	-0.0121296	0.772391	0.99578	NA	-0.00738146	0.316478	0.962732	NA	1	201015352	G	A	0.7029	NM_014875	uc010ppk.2	200620734	-
8123080	SYTL3	rs212405	0.475764	1430	0.901326	-0.0104405	0.441862	0.968985	NA	-0.0196157	0.487629	0.974744	NA	6	159049527	T	A	0.6824	NM_001009991	uc003qrp.3; uc003qrs.3; uc003qrr.3; uc063snw.1; uc063snx.1	158650013; 158650013; 158650013; 158650052; 158661318	+
8064216	RNU1-134P	rs2256814	0.475764	1431	0.901326	-0.0323504	0.576823	0.99462	NA	-0.0378088	0.234678	0.962732	NA	20	63742630	A	G	0.2088	ENST00000362935	uc061yqc.1	63908954	+
8035445	JUND	rs11554159	0.476235	1432	0.901587	0.00737005	0.357102	0.968985	NA	-0.0186373	0.811908	0.998254	NA	19	18175134	G	A	0.7235	NM_001286968	uc002nip.4; uc060vps.1	18281622; 18280929	-
8034084	AP1M2	rs34536443	0.476801	1433	0.90203	-0.0236702	0.0688512	0.908035	NA	0.0413894	0.0895027	0.944376	NA	19	10352442	C	G	0.97041	NM_005498	uc002mpc.4	10587314	-
8078310	RNU1-96P	rs2371108	0.477329	1434	0.902269	0.0171182	0.0629371	0.908035	NA	-0.0711115	0.507611	0.974744	NA	3	27715527	A	C	0.4118	ENST00000364163	uc062hqv.1	27513870	+
8074789	RN7SL280P	rs2283792	0.477781	1435	0.902269	-0.0140273	0.633638	0.99462	NA	-0.0190252	0.478263	0.974744	NA	22	21776836	C	A	0.5	ENST00000496490	uc062bzz.1	21723182	-
8054766	ACR	rs470119	0.477927	1436	0.902269	0.0106778	0.73428	0.99578	NA	0.00827411	0.877138	0.999408	NA	22	50528485	A	G	0.3882	NM_001097	uc003bnh.5	50738195	+
8030360	SNORD32A	rs2303759	0.4788	1437	0.902595	-0.0211273	0.75806	0.99578	NA	0.0175767	0.988525	0.999408	NA	19	49365794	C	A	0.2692	NR_000021	uc061bed.1	49489964	+
8007312	TUBG2	rs2293152	0.478867	1438	0.902595	0.0149408	0.658791	0.99462	NA	0.0168299	0.996177	0.999691	NA	17	42329511	C	G	0.6235	NM_016437	uc010wgr.3	42659304	+
8086051	SUSD5	rs28723576	0.479098	1439	0.902595	-0.00937111	0.453979	0.968985	NA	0.017165	0.503684	0.974744	NA	3	32936460	A	G	0.5414	NM_015551	uc003cfo.2	33219215	-
7967420	SBNO1	rs949143	0.479602	1440	0.902879	-0.00678118	0.446748	0.968985	NA	0.014065	0.542647	0.974744	NA	12	123110616	G	A	0.3176	NM_001167856	uc010tap.2	123350441	-
8038427	TSKS	rs2303759	0.480195	1441	0.902879	-0.00988984	0.96528	0.998203	NA	-0.00110654	0.321538	0.962732	NA	19	49365794	C	A	0.2692	ENST00000358830	uc061bja.1	49747378	-
8131970	EVX1	rs706015	0.480484	1442	0.902879	-0.00920845	0.0729756	0.908035	NA	0.0358448	0.27879	0.962732	NA	7	26975369	C	A	0.1824	NM_001989	uc003szd.2	27242699	+
8014825	FBXL20	rs12946510	0.480755	1443	0.902879	-0.0065649	0.38809	0.968985	NA	-0.0142707	0.71042	0.998254	NA	17	39756124	A	G	0.4912	NM_001184906	uc010cvu.4	39401623	-
8035494	FKBP8	rs874628	0.480914	1444	0.902879	-0.00614499	0.159949	0.935905	NA	-0.0247693	0.954431	0.999408	NA	19	18193890	A	G	0.7	NM_012181	uc060vrp.1	18543577	-
8139640	DDC	rs201847125	0.482764	1445	0.905725	0.00984053	0.346437	0.968985	NA	-0.0216965	0.126993	0.944376	NA	7	50285971	G	A	0.7012	NM_000790	uc003tpf.5	50561054	-
7903391	NA	rs11581062	0.483387	1446	0.906073	-0.0126823	0.380668	0.968985	NA	-0.0249599	0.0540656	0.944376	NA	1	100941963	G	A	0.2853	NA	uc057iru.1	101133152	+
8033159	PSPN	rs1077667	0.483618	1447	0.906073	0.00758228	0.401218	0.968985	NA	0.0139456	0.862295	0.999408	NA	19	6668961	G	A	0.7941	NM_004158	uc010xja.2	6375849	-
8035318	UNC13A	rs11554159	0.484511	1448	0.906328	0.00867282	0.71363	0.995524	NA	0.00848789	0.899456	0.999408	NA	19	18175134	G	A	0.7235	NM_001080421	uc060vkq.1	17688199	-
7986132	MAN2A2	rs8042861	0.484581	1449	0.906328	-0.00638989	0.625907	0.99462	NA	0.00894619	0.609317	0.985816	NA	15	90434101	A	C	0.4588	NM_006122	uc002bqc.4	90904189	+
8038314	C19orf73	rs8107548	0.485022	1450	0.906328	-0.00929992	0.23371	0.942254	NA	0.0294959	0.0673164	0.944376	NA	19	49367386	G	A	0.2647	NM_018111	uc002pmq.4	49119140	-
8067754	C20orf181	rs6062314	0.485547	1451	0.906328	-0.0128166	0.696074	0.995524	NA	0.00800447	0.527372	0.974744	NA	20	63778360	A	G	0.91471	XR_109593	uc061ypy.1	63843915	-
7990714	CHRNA3	rs59772922	0.485676	1452	0.906328	0.0128107	0.329084	0.968985	NA	0.0244385	0.0059446	0.893422	NA	15	78915124	A	G	0.8441	NM_000743	uc002bec.4	78621179	-
8126007	PXT1	rs941816	0.48576	1453	0.906328	-0.0166468	0.4028	0.968985	NA	-0.0306913	0.85546	0.999383	NA	6	36407527	G	A	0.1912	NM_152990	uc003omd.3	36442889	-
8064100	PPDPF	rs2256814	0.486673	1454	0.90672	-0.0156707	0.740052	0.99578	NA	0.0119311	0.511759	0.974744	NA	20	63742630	A	G	0.2088	NM_024299	uc002yff.4	63520723	+
8083707	C3orf80	rs4680534	0.48753	1455	0.90672	-0.00935402	0.829261	0.998203	NA	0.00501894	0.138084	0.948749	NA	3	159981157	C	T	0.3882	NM_001168214	uc021xgp.2	160225635	+
8041638	RNU6-137P	rs2163226	0.487925	1456	0.90672	0.0166279	0.403198	0.968985	NA	-0.0308373	0.457697	0.974744	NA	2	43134117	A	G	0.7059	ENST00000363680	uc061ipx.1	42712739	+
8112174	RNA5SP185	rs71624119	0.488041	1457	0.90672	-0.00947107	0.909567	0.998203	NA	0.0024888	0.625704	0.985816	NA	5	56144903	G	A	0.7706	ENST00000390963	uc063dss.1	56260446	-
7998494	CCDC154	rs2744148	0.488394	1458	0.90672	-0.00861241	0.132888	0.934639	NA	-0.0260405	0.591306	0.983186	NA	16	1023552	G	A	0.1559	NM_001143980	uc059oxj.1	1444489	-
7903010	RPL5	rs41286801	0.488408	1459	0.90672	-0.00709897	0.0047509	0.80498	NA	0.0406415	0.474601	0.974744	NA	1	92509907	A	G	0.1941	NM_000969	uc001doz.4	92832024	+
7956524	PIP4K2C	rs201202118	0.488621	1460	0.90672	-0.00696659	0.958732	0.998203	NA	0.000964751	0.016758	0.907602	NA	12	57788279	A	T	0.6964	NM_001146259	uc010srs.3	57591242	+
7923319	TMEM9	rs55838263	0.488646	1461	0.90672	0.00975898	0.446341	0.968985	NA	-0.0172451	0.987788	0.999408	NA	1	200905600	A	G	0.7118	NM_001288564	uc001gwa.5	201171574	-
7940323	MS4A8	rs34383631	0.489453	1462	0.906722	-0.0106382	0.301442	0.961895	NA	-0.0281013	0.843501	0.998254	NA	11	61025858	A	G	0.4676	NM_031457	uc001npv.4	60699573	+
8051812	RNU6-242P	rs6718520	0.489597	1463	0.906722	0.0350764	0.29476	0.961605	NA	-0.0782113	0.0562826	0.944376	NA	2	43098432	A	G	0.4412	ENST00000384359	uc061iqj.1	43091494	-
8152815	TMEM75	rs759648	0.490277	1464	0.906722	-0.0102359	0.397923	0.968985	NA	-0.023613	0.956698	0.999408	NA	8	128146699	C	A	0.3059	NR_103558	uc003ysm.3	127948723	-
7993185	NUBP1	rs12927355	0.490527	1465	0.906722	0.00672766	0.63913	0.99462	NA	0.00738105	0.730186	0.998254	NA	16	11100914	G	A	0.7059	NM_001278506	uc002dab.3	10743854	+
8026821	MAP1S	rs874628	0.4908	1466	0.906722	0.00544818	0.363304	0.968985	NA	-0.0149596	0.507039	0.974744	NA	19	18193890	A	G	0.7	NM_018174	uc002nhe.2	17719351	+
7934451	AGAP5	rs2688608	0.491713	1467	0.906722	0.00887734	0.99032	0.999431	NA	0.000280281	0.923592	0.999408	NA	10	73898591	A	C	0.6147	NM_001144000	uc009xri.4	73697867	-
8063043	UBE2C	rs6074022	0.491933	1468	0.906722	0.00678144	0.447789	0.968985	NA	-0.0135432	0.765744	0.998254	NA	20	46111557	C	T	0.2735	NM_001281741	uc032pld.2	45812575	+
8015685	EZH1	rs744166	0.493499	1469	0.906722	-0.00639785	0.0344414	0.908035	NA	0.0381202	0.77764	0.998254	NA	17	42362183	G	A	0.3971	NM_001991	uc002iaz.4	42745030	-
8111569	RANBP3L	rs6897932	0.493985	1470	0.906722	-0.0132114	0.631522	0.99462	NA	-0.0141795	0.59187	0.983186	NA	5	35874473	G	A	0.7059	NM_001161429	uc011cow.3	36301900	-
8111569	RANBP3L	rs6881706	0.493985	1471	0.906722	-0.0132114	0.631522	0.99462	NA	-0.0141795	0.59187	0.983186	NA	5	35879054	C	A	0.7059	NM_001161429	uc011cow.3	36301900	-
8116113	FAM193B	rs4976646	0.494224	1472	0.906722	-0.00631894	0.918321	0.998203	NA	-0.00185795	0.872674	0.999408	NA	5	177361569	G	A	0.3095	NM_001190946	uc003mhu.4	177554507	-
7975787	JDP2	rs2300603	0.495341	1473	0.906722	-0.0120644	0.784764	0.996634	NA	0.0071894	0.988011	0.999408	NA	14	75539214	A	G	0.7456	NM_001135047	uc010asj.4	75427715	+
8086008	DYNC1LI1	rs28723576	0.495689	1474	0.906722	-0.00686918	0.29856	0.961895	NA	0.0187326	0.802122	0.998254	NA	3	32936460	A	G	0.5414	NM_016141	uc003cfb.4	32570874	-
7956593	OS9	rs12368653	0.495708	1475	0.906722	0.0039725	0.939285	0.998203	NA	0.000944611	0.249114	0.962732	NA	12	57739473	A	G	0.4765	NM_001017956	uc001spl.4	57693954	+
7985997	NGRN	rs8042861	0.496133	1476	0.906722	0.00774545	0.258131	0.951976	NA	-0.0245404	0.348565	0.970185	NA	15	90434101	A	C	0.4588	ENST00000379095	uc002bpf.2	90265704	+
7993223	CLEC16A	rs4780346	0.496199	1477	0.906722	-0.00543203	0.984491	0.999431	NA	0.000245573	0.605705	0.985816	NA	16	11194949	A	G	0.2618	NM_001243403	uc002dan.5	10944580	+
8063026	RNU6ATAC38P	rs4810485	0.497178	1478	0.906722	0.010792	0.704495	0.995524	NA	0.010338	0.274394	0.962732	NA	20	46119308	A	C	0.2706	ENST00000408119	uc021wel.1	45778697	+
7948504	VPS37C	rs650258	0.497705	1479	0.906722	0.00569093	0.243072	0.945433	NA	0.01976	0.328613	0.962732	NA	11	61064810	G	A	0.65	NM_017966	uc001nqv.2	61161617	-
7897295	TAS1R1	rs3007421	0.49794	1480	0.906722	0.0117427	0.928756	0.998203	NA	-0.00202907	0.707252	0.998254	NA	1	6470129	A	G	0.1294	NM_138697	uc001ant.4	6555180	+
8067680	HELZ2	rs2256814	0.49804	1481	0.906722	-0.00638376	0.460634	0.968985	NA	0.0124714	0.0145292	0.907602	NA	20	63742630	A	G	0.2088	NM_001037335	uc061ynp.1	63572455	-
7980304	RNU4ATAC14P	rs4903324	0.498159	1482	0.906722	-0.0299765	0.880019	0.998203	NA	0.00940639	0.467993	0.974744	NA	14	75495168	A	G	0.2088	ENST00000516204	uc059dnl.1	75202169	-
8067743	ZBTB46	rs2256814	0.498687	1483	0.906722	-0.00806029	0.175805	0.942254	NA	0.0262015	0.857589	0.999383	NA	20	63742630	A	G	0.2088	NM_025224	uc061ypr.1	63790923	-
7949019	RNU6-1306P	rs694739	0.498874	1484	0.906722	-0.0343692	0.968782	0.998203	NA	-0.00300876	0.852118	0.999383	NA	11	64329761	A	G	0.6382	ENST00000365219	uc058csc.1	63882685	-
8025053	TNFSF9	rs1077667	0.499309	1485	0.906722	0.010439	0.361546	0.968985	NA	0.0212941	0.969426	0.999408	NA	19	6668961	G	A	0.7941	NM_003811	uc002mfh.2	6530998	+
7998449	TSR3	rs2744148	0.49936	1486	0.906722	-0.00950782	0.355387	0.968985	NA	0.0175551	0.682998	0.992819	NA	16	1023552	G	A	0.1559	NM_001001410	uc002cll.4	1351911	-
7934384	MSS51	rs2688608	0.499741	1487	0.906722	-0.00863753	0.474883	0.968985	NA	0.016643	0.731778	0.998254	NA	10	73898591	A	C	0.6147	NM_001024593	uc001jud.4	73433561	-
7928558	ZMIZ1	rs1250542	0.500785	1488	0.906722	0.00642845	0.748963	0.99578	NA	0.00552252	0.637162	0.985816	NA	10	79274913	A	G	0.3946	NM_020338	uc001kaf.3	79069034	+
7917735	RNU6-970P	rs11810217	0.50108	1489	0.906722	-0.0156734	0.194246	0.942254	NA	0.0460517	0.964028	0.999408	NA	1	92682820	A	G	0.2706	ENST00000516312	uc057iif.1	92969710	-
8091757	TRIM59	rs1014486	0.501095	1490	0.906722	-0.012035	0.504634	0.972686	NA	-0.0198457	0.6027	0.985816	NA	3	159973324	G	A	0.4559	NM_173084	uc003fdm.4	160449829	-
7923271	CACNA1S	rs7522462	0.501509	1491	0.906722	0.00915635	0.769007	0.99578	NA	0.00619464	0.682682	0.992819	NA	1	200912467	G	A	0.7176	NM_000069	uc001gvv.4	201112566	-
7999433	NA	rs12708716	0.501825	1492	0.906722	-0.0102001	0.474096	0.968985	NA	0.017299	0.880182	0.999408	NA	16	11086016	A	G	0.6941	NA	uc059qus.1	11274236	-
7994715	INO80E	rs7204270	0.501859	1493	0.906722	-0.00664719	0.165444	0.935905	NA	-0.0255494	0.665575	0.987612	NA	16	30145642	G	A	0.5265	ENST00000540562	uc059sxt.1	29996273	+
7993195	CIITA	rs4780346	0.501918	1494	0.906722	-0.00813196	0.738438	0.99578	NA	0.0068009	0.299444	0.962732	NA	16	11194949	A	G	0.2618	NM_000246	uc002dai.5	10877197	+
8007176	TTC25	rs9891119	0.502257	1495	0.906722	0.0109342	0.331995	0.968985	NA	0.0244887	0.807127	0.998254	NA	17	42355962	C	A	0.3265	NM_031421	uc032fin.2	41930655	+
8007176	TTC25	rs4796791	0.502257	1496	0.906722	0.0109342	0.331995	0.968985	NA	0.0244887	0.807127	0.998254	NA	17	42378745	A	G	0.3265	NM_031421	uc032fin.2	41930655	+
7949046	TRPT1	rs694739	0.502354	1497	0.906722	0.00823199	0.472509	0.968985	NA	-0.0147562	0.969305	0.999408	NA	11	64329761	A	G	0.6382	NM_001033678	uc001nyn.4; uc010rnd.3; uc010rne.3; uc058cuc.1; uc058cud.1; uc058cue.1; uc058cuf.1; uc058cug.1; uc058cuh.1; uc001nyo.4; uc058cui.1; uc058cuj.1; uc058cuk.1; uc058cul.1; uc058cum.1; uc058cun.1	64226150; 64226254; 64226254; 64224666; 64224824; 64226229; 64224634; 64226164; 64224669; 64226209; 64225870; 64226158; 64226233; 64226148; 64226141; 64226234	-
8026821	MAP1S	rs11554159	0.50236	1498	0.906722	0.0053324	0.349139	0.968985	NA	-0.0153812	0.468289	0.974744	NA	19	18175134	G	A	0.7235	NM_018174	uc002nhe.2	17719351	+
7917322	SYDE2	rs12087340	0.502422	1499	0.906722	-0.0155532	0.786764	0.996634	NA	0.00602633	0.609522	0.985816	NA	1	85281310	A	G	0.07647	NM_032184	uc009wcm.4	85201046	-
7953934	RN7SKP161	rs10466829	0.502451	1500	0.906722	-0.0101033	0.937384	0.998203	NA	0.00197116	0.158585	0.953651	NA	12	9723495	A	G	0.5147	ENST00000411110	uc058lbu.1	10084185	+
8074020	SELO	rs470119	0.502752	1501	0.906722	-0.00661659	0.668439	0.99462	NA	-0.00714447	0.39653	0.974744	NA	22	50528485	A	G	0.3882	NM_031454	uc021wry.1	50200978	+
7917695	RN7SL824P	rs11810217	0.502965	1502	0.906722	0.0158524	0.532294	0.975692	NA	-0.0218637	0.556797	0.976014	NA	1	92682820	A	G	0.2706	ENST00000470692	uc057ihr.1	92402685	-
7944351	FOXR1	rs533646	0.503554	1503	0.906722	0.00960821	0.256612	0.951976	NA	-0.0275266	0.445162	0.974744	NA	11	118696037	G	C	0.6607	NM_181721	uc001pui.4	118971706	+
7964596	RN7SKP65	rs703842	0.503609	1504	0.906722	0.0226534	0.258919	0.951976	NA	-0.0646908	0.36205	0.970201	NA	12	57768956	A	G	0.6882	ENST00000410278	uc058qej.1	57978277	-
8033956	S1PR2	rs34536443	0.50367	1505	0.906722	-0.0177667	0.204811	0.942254	NA	0.0241202	0.151572	0.952715	NA	19	10352442	C	G	0.97041	NM_004230	uc002mnl.3	10231272	-
8096635	NFKB1	rs7665090	0.503697	1506	0.906722	-0.00651277	0.460633	0.968985	NA	-0.0133516	0.708853	0.998254	NA	4	102630446	G	A	0.5235	NM_001165412	uc011ceq.3	102501330	+
8016336	OSBPL7	rs4794058	0.504907	1507	0.908013	-0.00585331	0.0197825	0.908035	NA	-0.0383503	0.880144	0.999408	NA	17	47519732	A	G	0.503	NM_145798	uc002ilx.2	47821770	-
8007992	KPNB1	rs4239162	0.505084	1508	0.908013	0.0063854	0.213281	0.942254	NA	0.0227358	0.672076	0.988175	NA	17	47678444	G	A	0.5059	NM_001276453	uc010wkw.2	47651195	+
7967358	PITPNM2	rs1790100	0.505696	1509	0.908282	-0.00987487	0.216948	0.942254	NA	-0.0281304	0.884936	0.999408	NA	12	123172178	G	T	0.2324	NM_020845	uc001uej.2	123110428	-
8126058	PPIL1	rs941816	0.506518	1510	0.908282	0.010654	0.550907	0.988938	NA	0.0137559	0.49557	0.974744	NA	6	36407527	G	A	0.1912	NM_016059	uc003omu.3	36875024	-
8030383	RCN3	rs2303759	0.506725	1511	0.908282	0.010187	0.630562	0.99462	NA	0.0139426	0.731539	0.998254	NA	19	49365794	C	A	0.2692	NM_020650	uc002poj.4	49527617	+
8129880	PERP	rs7769192	0.506895	1512	0.908282	-0.00793008	0.89513	0.998203	NA	-0.00300799	0.265842	0.962732	NA	6	137641518	G	A	0.5	NM_022121	uc003qht.3	138107511	-
7926914	RNA5SP309	rs793108	0.506909	1513	0.908282	0.00939785	0.509225	0.972686	NA	0.0167722	0.830561	0.998254	NA	10	31126177	A	G	0.4971	ENST00000516670	uc021pou.1	31259598	+
7956573	SLC26A10	rs12368653	0.507627	1514	0.908968	-0.0112911	0.802866	0.998203	NA	0.00745078	0.47562	0.974744	NA	12	57739473	A	G	0.4765	NM_133489	uc001spe.4	57619909	+
8038314	C19orf73	rs2303759	0.508016	1515	0.90897	-0.00865686	0.256368	0.951976	NA	0.0285489	0.0595687	0.944376	NA	19	49365794	C	A	0.2692	NM_018111	uc002pmq.4	49119140	-
7921786	PFDN2	rs35967351	0.508427	1516	0.90897	0.00698376	0.681114	0.99462	NA	0.0073392	0.498447	0.974744	NA	1	160742014	A	T	0.6706	NM_012394	uc001fxu.4	161118111	-
7912086	NOL9	rs3007421	0.508844	1517	0.90897	-0.00829601	0.711696	0.995524	NA	0.00610011	0.986327	0.999408	NA	1	6470129	A	G	0.1294	NM_024654	uc001ans.4	6554535	-
7939751	NR1H3	rs7120737	0.509517	1518	0.90897	-0.0145728	0.499169	0.972686	NA	-0.0193987	0.794056	0.998254	NA	11	47680843	G	A	0.1324	NM_001130101	uc001nen.5	47257997	+
8008870	VMP1	rs180515	0.509648	1519	0.90897	-0.0046284	0.634051	0.99462	NA	0.00681922	0.349662	0.970201	NA	17	59946914	G	A	0.35	NM_030938	uc002ixu.5	59707464	+
7975770	RNU6-689P	rs4903324	0.510279	1520	0.90897	0.0161975	0.141507	0.935905	NA	-0.0483578	0.723544	0.998254	NA	14	75495168	A	G	0.2088	ENST00000384197	uc059dmd.1	75020760	+
8083737	MIR15B	rs2243123	0.510334	1521	0.90897	-0.0214797	0.800606	0.998203	NA	-0.0141681	0.82383	0.998254	NA	3	159991864	G	A	0.3	NR_029663	uc011boz.1	160404587	+
7999440	PRM1	rs7200786	0.51043	1522	0.90897	0.00909984	0.0769355	0.908035	NA	0.043645	0.294482	0.962732	NA	16	11083944	A	G	0.4941	NM_002761	uc002dav.4	11281350	-
8034099	MIR199A1	rs2288904	0.510882	1523	0.90897	0.0204557	0.252744	0.951976	NA	-0.054409	0.646282	0.985816	NA	19	10631494	G	A	0.7882	NR_029586	uc010xlj.1	10817496	-
7919067	REG4	rs666930	0.510982	1524	0.90897	0.00847134	0.378893	0.968985	NA	0.0210223	0.385744	0.974744	NA	1	119716347	G	A	0.5588	NM_001159352	uc001eig.3	119811580	-
7993248	RMI2	rs12927355	0.513146	1525	0.912129	-0.0084834	0.642579	0.99462	NA	-0.00945122	0.389691	0.974744	NA	16	11100914	G	A	0.7059	NM_152308	uc002daw.2	11345430	+
7961091	CLEC2A	rs10466829	0.51343	1526	0.912129	0.0111181	0.993283	0.999431	NA	-0.000246084	0.589006	0.981436	NA	12	9723495	A	G	0.5147	NM_207375	uc009zhb.3	9932347	-
7931899	IL15RA	rs12722489	0.514341	1527	0.912922	0.0121495	0.77396	0.99578	NA	-0.0065405	0.270835	0.962732	NA	10	6060049	C	T	0.8647	NM_001243539	uc001iiw.4	5978187	-
8030321	ALDH16A1	rs2303759	0.51455	1528	0.912922	-0.00749345	0.343204	0.968985	NA	-0.0210004	0.16118	0.953651	NA	19	49365794	C	A	0.2692	NM_001145396	uc010yar.3	49453235	+
7939818	PTPMT1	rs7120737	0.516118	1529	0.913	-0.00766008	0.71897	0.99578	NA	-0.00506054	0.416699	0.974744	NA	11	47680843	G	A	0.1324	NM_001143984	uc001nfv.5	47565429	+
8064218	PRPF6	rs2256814	0.516573	1530	0.913	-0.0059724	0.428784	0.968985	NA	0.0112123	0.846521	0.998254	NA	20	63742630	A	G	0.2088	NM_012469	uc002yho.4	63981134	+
7908409	RGS2	rs1359062	0.516631	1531	0.913	-0.00932733	0.830942	0.998203	NA	0.00433065	0.956884	0.999408	NA	1	192572342	C	G	0.8353	ENST00000464302	uc057obd.1	192809041	+
8033135	GTF2F1	rs1077667	0.517367	1532	0.913	-0.00598562	0.74375	0.99578	NA	-0.00457878	0.991079	0.999548	NA	19	6668961	G	A	0.7941	NM_002096	uc002meq.3	6393460	-
8030448	CPT1C	rs8107548	0.518085	1533	0.913	-0.00714739	0.630875	0.99462	NA	0.0101476	0.686266	0.994448	NA	19	49367386	G	A	0.2647	NM_001136052	uc002ppk.4	49691143	+
7967386	MPHOSPH9	rs1790100	0.518936	1534	0.913	0.00847474	0.897899	0.998203	NA	-0.00263678	0.12402	0.944376	NA	12	123172178	G	T	0.2324	NM_022782	uc001uel.5	123233123	-
8002247	RNU4-30P	rs1886700	0.518939	1535	0.913	-0.0122528	0.462176	0.968985	NA	0.0183217	0.492645	0.974744	NA	16	68652002	A	G	0.1382	ENST00000410245	uc021tke.1	68329529	-
8017141	RNU4-13P	rs8070345	0.518958	1536	0.913	-0.0112491	0.268343	0.951976	NA	-0.0400145	0.916249	0.999408	NA	17	59739396	A	G	0.5059	ENST00000364019	uc060icp.1	59537499	-
8052735	CNRIP1	rs7592330	0.519321	1537	0.913	0.00592964	0.116882	0.929176	NA	-0.0283374	0.61933	0.985816	NA	2	68419651	A	G	0.5853	NM_001111101	uc002sej.5	68319400	-
8052735	CNRIP1	rs7595037	0.519321	1538	0.913	0.00592964	0.116882	0.929176	NA	-0.0283374	0.61933	0.985816	NA	2	68419963	A	G	0.5824	NM_001111101	uc002sej.5	68319400	-
7944365	CCDC84	rs533646	0.519592	1539	0.913	-0.00696535	0.903066	0.998203	NA	-0.00232672	0.692156	0.994929	NA	11	118696037	G	C	0.6607	NM_198489	uc001pul.5	118998141	+
7904421	HSD3B1	rs666930	0.519658	1540	0.913	-0.00713177	0.581096	0.99462	NA	-0.0114772	0.964834	0.999408	NA	1	119716347	G	A	0.5588	NM_000862	uc001ehv.2	119507202	+
7960635	SCARNA11	rs1800693	0.519913	1541	0.913	-0.00931408	0.106213	0.929176	NA	-0.039744	0.324453	0.962732	NA	12	6330843	G	A	0.45	NR_003012	uc001qpr.2	6581609	-
8008834	CLTC	rs8070345	0.519952	1542	0.913	0.00370193	0.0734709	0.908035	NA	0.0252303	0.816007	0.998254	NA	17	59739396	A	G	0.5059	NM_001288653	uc002ixr.1	59619688	+
7944275	TMEM25	rs523604	0.520089	1543	0.913	0.00836785	0.590531	0.99462	NA	0.0123154	0.205757	0.962732	NA	11	118885029	A	G	0.5353	NM_001144034	uc009zad.4; uc001pth.4; uc001ptm.3; uc058hys.1; uc058hyt.1; uc058hyu.1; uc058hyv.1; uc058hyw.1; uc001ptl.3; uc058hyx.1; uc058hyy.1; uc058hyz.1; uc058hza.1; uc058hzb.1; uc058hzc.1; uc058hzd.1; uc001pti.4; uc058hze.1; uc001ptk.5; uc058hzf.1; uc058hzg.1; uc058hzh.1; uc010rye.3; uc058hzi.1; uc058hzj.1; uc058hzk.1; uc058hzl.1; uc058hzm.1; uc058hzn.1; uc058hzo.1	118531040; 118531087; 118531087; 118531174; 118531191; 118531191; 118531191; 118531191; 118531198; 118531201; 118531201; 118531201; 118531201; 118531201; 118531201; 118531201; 118531201; 118531201; 118531201; 118531201; 118531202; 118531202; 118531208; 118531357; 118531389; 118531470; 118531495; 118531525; 118531572; 118533031	+
8016366	MRPL10	rs4239162	0.520664	1544	0.913	0.00810658	0.170742	0.942254	NA	-0.0314781	0.268645	0.962732	NA	17	47678444	G	A	0.5059	NM_145255	uc002ilz.4	47831517	-
8082066	FAM162A	rs9282641	0.520767	1545	0.913	-0.0172898	0.991296	0.999431	NA	-0.000319284	0.402606	0.974744	NA	3	122077921	G	A	0.9	NM_014367	uc003eez.4	122384181	+
7897089	PLCH2	rs4648356	0.521104	1546	0.913	-0.00547441	0.0284615	0.908035	NA	-0.030857	0.202803	0.962732	NA	1	2792599	C	A	0.6716	ENST00000343889	uc001ajk.2	2479089	+
7977046	TNFAIP2	rs12148050	0.521298	1547	0.913	0.00768105	0.637924	0.99462	NA	-0.00945864	0.179915	0.962732	NA	14	102797451	A	G	0.3441	NM_006291	uc001ymm.1	103126326	+
8048926	SP140L	rs10201872	0.521329	1548	0.913	0.0107135	0.286553	0.951976	NA	0.0249632	0.0798642	0.944376	NA	2	230242009	A	G	0.1824	ENST00000396563	uc032ouy.2	230327269	+
7921332	CD5L	rs3761959	0.522748	1549	0.913246	-0.00660621	0.667812	0.99462	NA	0.00811143	0.0528571	0.944376	NA	1	157699488	G	A	0.5559	NM_005894	uc001frk.5	157841798	-
7947969	FNBP4	rs7120737	0.523408	1550	0.913246	0.00879689	0.507993	0.972686	NA	-0.0110879	0.977472	0.999408	NA	11	47680843	G	A	0.1324	NM_015308	uc009ylv.4	47767301	-
8066559	WFDC9	rs2425752	0.523678	1551	0.913246	0.0140489	0.387724	0.968985	NA	0.034666	0.108549	0.944376	NA	20	46073481	A	G	0.2853	NM_147198	uc002xoy.3	45631268	-
8016387	PRR15L	rs4794058	0.523955	1552	0.913246	0.00995353	0.428484	0.968985	NA	-0.0218488	0.795424	0.998254	NA	17	47519732	A	G	0.503	NM_024320	uc002imp.5	47957878	-
8128260	MAP3K7	rs12212193	0.52413	1553	0.913246	-0.00494009	0.31772	0.968985	NA	-0.0127148	0.244069	0.962732	NA	6	90287050	G	A	0.5148	NM_003188	uc003pob.3	90587045	-
7906728	TOMM40L	rs35967351	0.5246	1554	0.913246	-0.010955	0.935357	0.998203	NA	0.00227899	0.00652982	0.893422	NA	1	160742014	A	T	0.6706	NM_001286373	uc010pkl.3; uc001fzd.5; uc057mqv.1; uc057mqw.1; uc057mqx.1; uc057mqy.1; uc001fze.5; uc057mqz.1; uc057mra.1	161225938; 161226002; 161226059; 161226062; 161226072; 161226081; 161226303; 161227883; 161228429	+
7917331	C1orf52	rs11587876	0.524799	1555	0.913246	-0.00862513	0.924288	0.998203	NA	0.00200876	0.124631	0.944376	NA	1	85449500	A	G	0.7618	NM_198077	uc001dkv.4	85259642	-
7903049	CCDC18	rs11810217	0.524888	1556	0.913246	0.0138109	0.792725	0.996843	NA	-0.00826561	0.902261	0.999408	NA	1	92682820	A	G	0.2706	NM_206886	uc021opx.2	93180362	+
7944335	CXCR5	rs523604	0.525066	1557	0.913246	0.0123369	0.675422	0.99462	NA	-0.0146763	0.00383622	0.846137	NA	11	118885029	A	G	0.5353	NM_001716	uc001pue.5	118883765	+
7964555	AVIL	rs12368653	0.525536	1558	0.913246	-0.00861562	0.129253	0.932519	NA	-0.0369135	0.113485	0.944376	NA	12	57739473	A	G	0.4765	NM_006576	uc001sqj.4	57816471	-
8030525	PTOV1	rs8107548	0.52557	1559	0.913246	0.0048058	0.853115	0.998203	NA	-0.00267684	0.580712	0.978581	NA	19	49367386	G	A	0.2647	NM_017432	uc002pqf.2	49851158	+
7921702	ITLN2	rs35967351	0.526661	1560	0.913246	-0.00974665	0.378941	0.968985	NA	0.0222111	0.715064	0.998254	NA	1	160742014	A	T	0.6706	NM_080878	uc001fxd.4	160954799	-
8074791	MAPK1	rs2283792	0.527039	1561	0.913246	-0.00362204	0.729231	0.99578	NA	0.00417255	0.656456	0.985816	NA	22	21776836	C	A	0.5	NM_002745	uc002zvn.4	21867629	-
7940341	MS4A10	rs650258	0.527187	1562	0.913246	-0.00923708	0.886359	0.998203	NA	-0.00402902	0.750977	0.998254	NA	11	61064810	G	A	0.65	NM_206893	uc001npz.1	60785347	+
8048940	SP100	rs9989735	0.527398	1563	0.913246	-0.00907314	0.999511	0.999879	NA	1.17385e-05	0.141035	0.948749	NA	2	230250739	C	G	0.1737	NM_001206702	uc002vqq.3	230416246	+
7994730	C16orf92	rs7204270	0.527403	1564	0.913246	-0.00937902	0.859068	0.998203	NA	0.00446825	0.785971	0.998254	NA	16	30145642	G	A	0.5265	NM_001109660	uc002dvs.2	30023333	+
8066716	ELMO2	rs2425752	0.527556	1565	0.913246	-0.00739047	0.40986	0.968985	NA	-0.0180391	0.337301	0.962732	NA	20	46073481	A	G	0.2853	NM_133171	uc002xrt.2	46406617	-
8089743	B4GALT4	rs1132200	0.528093	1566	0.913246	-0.0124623	0.772166	0.99578	NA	-0.00735466	0.441802	0.974744	NA	3	119431989	C	T	0.8706	NM_003778	uc003eci.4	119241103	-
8047272	SPATS2L	rs281783	0.52891	1567	0.913246	0.0190465	0.399216	0.968985	NA	-0.0330048	0.644354	0.985816	NA	2	199886859	A	G	0.8118	NM_001100422	uc002uvp.5	200306150	+
8007363	WNK4	rs744166	0.528911	1568	0.913246	-0.00898508	0.300486	0.961895	NA	-0.0237671	0.965924	0.999408	NA	17	42362183	G	A	0.3971	NM_032387	uc002ibj.4	42780677	+
7999427	TNP2	rs12708716	0.529125	1569	0.913246	-0.00855205	0.332382	0.968985	NA	0.0216067	0.48567	0.974744	NA	16	11086016	A	G	0.6941	NM_005425	uc002das.4	11269332	-
8025028	CLPP	rs1077667	0.529708	1570	0.913246	-0.00675389	0.709869	0.995524	NA	-0.00611901	0.366391	0.970201	NA	19	6668961	G	A	0.7941	NM_006012	uc002mem.2	6361451	+
8016371	SCRN2	rs4239162	0.531193	1571	0.913246	-0.00602618	0.41276	0.968985	NA	-0.0146856	0.19462	0.962732	NA	17	47678444	G	A	0.5059	NM_001145023	uc002imf.4	47841289	-
8082003	EAF2	rs9282641	0.531491	1572	0.913246	-0.0120537	0.741144	0.99578	NA	-0.00733776	0.652188	0.985816	NA	3	122077921	G	A	0.9	NM_018456	uc003een.4	121835214	+
8074108	MAPK8IP2	rs470119	0.532378	1573	0.913246	0.00719932	0.475673	0.968985	NA	0.0138865	0.552459	0.974744	NA	22	50528485	A	G	0.3882	NM_012324	uc032qrw.2	50600684	+
8089928	RNU4-62P	rs9282641	0.532573	1574	0.913246	-0.0164557	0.11118	0.929176	NA	0.0470601	0.441425	0.974744	NA	3	122077921	G	A	0.9	ENST00000410125	uc062myl.1	121655604	-
7933427	AGAP5	rs2688608	0.532714	1575	0.913246	0.00805137	0.891812	0.998203	NA	0.00314678	0.860479	0.999383	NA	10	73898591	A	C	0.6147	NM_001144000	uc009xri.4	73697867	-
7999427	TNP2	rs12927355	0.532775	1576	0.913246	-0.00860784	0.346491	0.968985	NA	0.0214312	0.497312	0.974744	NA	16	11100914	G	A	0.7059	NM_005425	uc002das.4	11269332	-
7991395	GABARAPL3	rs8042861	0.53297	1577	0.913246	-0.0104843	0.330285	0.968985	NA	-0.0326361	0.921077	0.999408	NA	15	90434101	A	C	0.4588	NR_028287	uc059nep.1	90347586	+
7904254	ATP1A1	rs6677309	0.533007	1578	0.913246	0.00592145	0.692063	0.995524	NA	-0.0047932	0.43936	0.974744	NA	1	116537544	A	C	0.8728	NM_000701	uc001ege.5	116373259	+
7956524	PIP4K2C	rs703842	0.533095	1579	0.913246	-0.00602623	0.944418	0.998203	NA	0.00127351	0.0165809	0.907602	NA	12	57768956	A	G	0.6882	NM_001146259	uc010srs.3	57591242	+
7992121	PRR25	rs2744148	0.533311	1580	0.913246	0.0108788	0.354153	0.968985	NA	0.0220172	0.329072	0.962732	NA	16	1023552	G	A	0.1559	NM_001013638	uc010uut.2	805442	+
7917322	SYDE2	rs11587876	0.533622	1581	0.913246	-0.00810859	0.923851	0.998203	NA	0.00202039	0.0900361	0.944376	NA	1	85449500	A	G	0.7618	NM_032184	uc009wcm.4	85201046	-
8027024	UBA52	rs11554159	0.534142	1582	0.913246	0.00494122	0.414211	0.968985	NA	-0.0134271	0.632539	0.985816	NA	19	18175134	G	A	0.7235	NM_001033930	uc002njr.4	18571859	+
8063071	ZSWIM3	rs4810485	0.534486	1583	0.913246	-0.00977777	0.213783	0.942254	NA	-0.0332259	0.364745	0.970201	NA	20	46119308	A	C	0.2706	NM_080752	uc002xqd.4	45857616	+
8015590	STAT5B	rs744166	0.534544	1584	0.913246	-0.00495019	0.931583	0.998203	NA	0.00122408	0.329379	0.962732	NA	17	42362183	G	A	0.3971	NM_012448	uc002hzh.4	42276406	-
7998457	UNKL	rs2744148	0.534992	1585	0.913246	-0.00833315	0.986166	0.999431	NA	0.000326567	0.982679	0.999408	NA	16	1023552	G	A	0.1559	NM_001193388	uc031qup.2	1414720	-
7961102	CLEC1B	rs11052877	0.535293	1586	0.913246	-0.0148561	0.938126	0.998203	NA	0.00317192	0.917325	0.999408	NA	12	9753094	G	A	0.3882	NM_001099431	uc058lbk.1	9999300	-
8052747	BMP10	rs7592330	0.535773	1587	0.913246	-0.00992099	0.648013	0.99462	NA	0.013044	0.932962	0.999408	NA	2	68419651	A	G	0.5853	NM_014482	uc002sez.1	68871517	-
8052747	BMP10	rs7595037	0.535773	1588	0.913246	-0.00992099	0.648013	0.99462	NA	0.013044	0.932962	0.999408	NA	2	68419963	A	G	0.5824	NM_014482	uc002sez.1	68871517	-
8114145	VDAC1	rs756699	0.53579	1589	0.913246	0.0112859	0.342156	0.968985	NA	0.0232013	0.252542	0.962732	NA	5	134110884	A	G	0.8757	NM_003374	uc003kyr.3	134005133	-
7998267	JMJD8	rs2744148	0.535959	1590	0.913246	-0.00698418	0.523724	0.975333	NA	0.0107327	0.819832	0.998254	NA	16	1023552	G	A	0.1559	NM_001005920	uc002ciw.2	684439	-
7944493	CBL	rs523604	0.536227	1591	0.913246	-0.00625067	0.691251	0.995524	NA	0.00740307	0.747378	0.998254	NA	11	118885029	A	G	0.5353	NM_005188	uc001pwe.6	119206275	+
7979849	DCAF5	rs2236262	0.536936	1592	0.913246	0.00539747	0.214603	0.942254	NA	-0.0171869	0.298548	0.962732	NA	14	68794755	A	G	0.5529	NM_001284206	uc001xkq.4	69153003	-
8015642	PSMC3IP	rs2293152	0.537053	1593	0.913246	-0.00822705	0.0123347	0.908035	NA	0.0591602	0.700023	0.998254	NA	17	42329511	C	G	0.6235	NM_001256014	uc002iaj.5	42577697	-
8101992	SLC39A8	rs7665090	0.537216	1594	0.913246	-0.018035	0.113341	0.929176	NA	0.0961398	0.295892	0.962732	NA	4	102630446	G	A	0.5235	NM_001135148	uc011ceo.2; uc003hwb.2; uc003hwc.3; uc062yny.1; uc062ynz.1; uc062yoa.1; uc062yob.1; uc062yoc.1	102345205; 102345139; 102345474; 102304488; 102353000; 102345437; 102345482; 102431258	-
7998405	SSTR5-AS1	rs2744148	0.537302	1595	0.913246	0.0159789	0.538529	0.980492	NA	0.0210906	0.567415	0.977379	NA	16	1023552	G	A	0.1559	NR_027242	uc059oui.1	1078673	-
7993185	NUBP1	rs12708716	0.537687	1596	0.913327	0.00594807	0.633766	0.99462	NA	0.00728255	0.690617	0.994886	NA	16	11086016	A	G	0.6941	NM_001278506	uc002dab.3	10743854	+
7953871	NA	rs10466829	0.538077	1597	0.913364	-0.0134866	0.153924	0.935905	NA	-0.0546251	0.195123	0.962732	NA	12	9723495	A	G	0.5147	NA	uc021quu.1	9445057	+
8000917	ZNF785	rs7204270	0.538566	1598	0.913364	-0.00717262	0.266367	0.951976	NA	-0.0224046	0.571136	0.977379	NA	16	30145642	G	A	0.5265	NM_152458	uc002dyw.3	30585771	-
7931863	ASB13	rs12722489	0.538719	1599	0.913364	-0.0106904	0.214094	0.942254	NA	-0.0279872	0.348005	0.969622	NA	10	6060049	C	T	0.8647	NM_024701	uc001iig.3	5666578	-
8023766	RTTN	rs763361	0.539844	1600	0.914152	0.00842512	0.837338	0.998203	NA	-0.00510322	0.0108929	0.907602	NA	18	69864406	T	C	0.4912	NM_173630	uc002lkp.4	70205945	-
8115978	UIMC1	rs4075958	0.540142	1601	0.914152	-0.00685439	0.919192	0.998203	NA	0.00206129	0.726667	0.998254	NA	5	177357511	A	G	0.2515	NM_001199297	uc063kar.1; uc063kas.1; uc003mfe.2; uc063kaq.1; uc063kax.1; uc063kau.1; uc063kam.1; uc063kay.1; uc063kan.1; uc063kaw.1; uc063kap.1; uc063kao.1; uc063kat.1; uc063kav.1	176906176; 176907307; 176968889; 176970793; 176980276; 177006365; 177006408; 177006570; 177006581; 177006714; 177006715; 177006751; 177022602; 177022633	-
8152819	RNU4-25P	rs759648	0.540196	1602	0.914152	-0.0147344	0.511261	0.972686	NA	-0.0314603	0.583638	0.978581	NA	8	128146699	C	A	0.3059	ENST00000410569	uc022bbi.1	128010611	-
8102050	SLC9B2	rs7665090	0.540822	1603	0.914174	0.0123571	0.341019	0.968985	NA	-0.0370016	0.992297	0.999548	NA	4	102630446	G	A	0.5235	NM_178833	uc003hwy.4	103076773	-
8026494	OR10H4	rs1870071	0.540883	1604	0.914174	-0.0106962	0.881576	0.998203	NA	-0.00434639	0.285064	0.962732	NA	19	16394295	G	A	0.2882	NM_001004465	uc010xov.2	15949007	+
8017212	USP32	rs180515	0.542006	1605	0.914837	-0.00602311	0.119039	0.929176	NA	0.0307248	0.438658	0.974744	NA	17	59946914	G	A	0.35	NM_032582	uc002iyo.2	60392134	-
7926059	RN7SKP78	rs2104286	0.542328	1606	0.914837	-0.013493	0.198281	0.942254	NA	-0.0460139	0.881834	0.999408	NA	10	6057082	A	G	0.7618	ENST00000364711	uc057rmr.1	6149622	+
7903369	SLC30A7	rs12027668	0.542526	1607	0.914837	-0.00487507	0.225788	0.942254	NA	0.0181033	0.263343	0.962732	NA	1	100865428	G	A	0.429	NM_001144884	uc001dtn.3; uc001dto.3; uc057ird.1	100896075; 100896253; 100961827	+
8030171	FTL	rs8107548	0.542626	1608	0.914837	0.00460899	0.0958516	0.929176	NA	0.0244024	0.465255	0.974744	NA	19	49367386	G	A	0.2647	NM_000146	uc002plo.4	48965300	+
7944185	CD3G	rs533646	0.543251	1609	0.915077	0.0300294	0.186251	0.942254	NA	-0.0969443	0.528782	0.974744	NA	11	118696037	G	C	0.6607	NM_000073	uc001psu.3	118344355	+
7906330	CD1D	rs3761959	0.543443	1610	0.915077	-0.00628162	0.751625	0.99578	NA	-0.00594028	0.788925	0.998254	NA	1	157699488	G	A	0.5559	NM_001766	uc001frr.4	158179946	+
8038427	TSKS	rs8107548	0.543865	1611	0.91522	-0.0084815	0.950924	0.998203	NA	-0.0015585	0.284465	0.962732	NA	19	49367386	G	A	0.2647	ENST00000358830	uc061bja.1	49747378	-
8030128	PPP1R15A	rs8107548	0.54451	1612	0.915737	0.00950201	0.925516	0.998203	NA	0.00270081	0.287271	0.962732	NA	19	49367386	G	A	0.2647	NM_014330	uc002pky.5	48872391	+
7940835	COX8A	rs694739	0.545295	1613	0.916152	-0.00580646	0.922446	0.998203	NA	-0.00178279	0.0477987	0.944376	NA	11	64329761	A	G	0.6382	NM_004074	uc001nye.3	63974606	+
7961067	RNU6-700P	rs11052877	0.545433	1614	0.916152	-0.00990201	0.87037	0.998203	NA	0.00471396	0.396681	0.974744	NA	12	9753094	G	A	0.3882	ENST00000391043	uc058lae.1	9624228	-
8067773	ZNF512B	rs6062314	0.545775	1615	0.916158	-0.0126624	0.798215	0.998137	NA	0.00619277	0.0792074	0.944376	NA	20	63778360	A	G	0.91471	NM_020713	uc002yhl.3	63969865	-
8034075	CDKN2D	rs2288904	0.546587	1616	0.91661	-0.00844353	0.401844	0.968985	NA	-0.0168874	0.342691	0.962732	NA	19	10631494	G	A	0.7882	NM_001800	uc002mpa.4; uc002mpb.4	10568978; 10569059	-
8067709	GMEB2	rs2256814	0.547338	1617	0.91661	0.00582943	0.0140344	0.908035	NA	-0.0404247	0.107451	0.944376	NA	20	63742630	A	G	0.2088	NM_012384	uc002yfq.2	63627041	-
8008064	PNPO	rs4794058	0.547474	1618	0.91661	-0.00655526	0.173364	0.942254	NA	-0.0272798	0.88524	0.999408	NA	17	47519732	A	G	0.503	NM_018129	uc002imo.4	47941570	+
8023528	ALPK2	rs7238078	0.547695	1619	0.91661	-0.0126154	0.78035	0.99578	NA	-0.00909909	0.341821	0.962732	NA	18	58716960	A	C	0.7824	NM_052947	uc002lhj.5	58628957	-
8105067	PTGER4	rs4613763	0.548045	1620	0.91661	-0.0202137	0.298903	0.961895	NA	0.036578	0.914766	0.999408	NA	5	40392626	G	A	0.09412	NM_000958	uc003jlz.5	40679497	+
8025621	ICAM5	rs34536443	0.548073	1621	0.91661	0.0152921	0.494989	0.972686	NA	-0.0114323	0.227369	0.962732	NA	19	10352442	C	G	0.97041	NM_003259	uc002mnu.5	10289980	+
8015572	HCRT	rs744166	0.549304	1622	0.918103	0.0073122	0.767556	0.99578	NA	0.00626097	0.843572	0.998254	NA	17	42362183	G	A	0.3971	NM_001524	uc002hzc.1	42185452	-
8152815	TMEM75	rs2019960	0.550198	1623	0.918989	-0.00997595	0.47004	0.968985	NA	-0.0201926	0.987816	0.999408	NA	8	128180025	G	A	0.2426	NR_103558	uc003ysm.3	127948723	-
8038319	HRC	rs8107548	0.550682	1624	0.918989	-0.0079533	0.595514	0.99462	NA	0.0135441	0.606684	0.985816	NA	19	49367386	G	A	0.2647	NM_002152	uc002pmv.4	49155424	-
8033899	EIF3G	rs8112449	0.552346	1625	0.918989	-0.00409852	0.736433	0.99578	NA	0.0042875	0.0901597	0.944376	NA	19	10409388	G	A	0.6353	NM_003755	uc002mnd.4	10119902	-
8115570	IL12B	rs11743296	0.5524	1626	0.918989	-0.0100304	0.517128	0.975079	NA	-0.0145539	0.284084	0.962732	NA	5	159497075	A	G	0.1559	NM_002187	uc003lxr.2	159330887	-
8030321	ALDH16A1	rs8107548	0.552807	1627	0.918989	-0.00718996	0.438085	0.968985	NA	-0.0181006	0.0875374	0.944376	NA	19	49367386	G	A	0.2647	NM_001145396	uc010yar.3	49453235	+
7911796	LINC00982	rs3748817	0.55282	1628	0.918989	-0.00679862	0.422391	0.968985	NA	-0.0148707	0.622192	0.985816	NA	1	2594226	A	G	0.6559	NR_015440	uc057bov.1; uc001aka.4; uc057bow.1; uc057box.1; uc057boy.1; uc057boz.1; uc010nzg.2	3062531; 3063786; 3061751; 3062032; 3068437; 3063682; 3067769	-
8105409	RNA5SP183	rs71624119	0.553979	1629	0.918989	-0.0262961	0.330411	0.968985	NA	-0.0687642	0.432995	0.974744	NA	5	56144903	G	A	0.7706	ENST00000362452	uc063drs.1	55777468	+
8138757	HOXA10	rs706015	0.554406	1630	0.918989	-0.00628284	0.0644692	0.908035	NA	0.0337661	0.830106	0.998254	NA	7	26975369	C	A	0.1824	NM_018951	uc011jzm.3	27174306	-
8048980	CAB39	rs9989735	0.554482	1631	0.918989	-0.00954018	0.726838	0.99578	NA	-0.00725814	0.574294	0.977379	NA	2	230250739	C	G	0.1737	NM_001130849	uc010fxq.4	230713547	+
8082058	CSTA	rs9282641	0.554655	1632	0.918989	-0.0142684	0.268536	0.951976	NA	-0.0287803	0.955517	0.999408	NA	3	122077921	G	A	0.9	NM_005213	uc003eex.4	122325243	+
7917697	GFI1	rs41286801	0.554729	1633	0.918989	0.0096216	0.728853	0.99578	NA	-0.00782483	0.786678	0.998254	NA	1	92509907	A	G	0.1941	NM_001127215	uc001dou.5	92483954	-
7952132	SLC37A4	rs523604	0.555391	1634	0.918989	0.00586617	0.296261	0.961874	NA	-0.0192107	0.529599	0.974744	NA	11	118885029	A	G	0.5353	NM_001164277	uc058idf.1	119030906	-
8104912	SKP2	rs6897932	0.555816	1635	0.918989	-0.0066671	0.672947	0.99462	NA	0.00805745	0.156736	0.952715	NA	5	35874473	G	A	0.7059	NM_001243120	uc011cou.3	36152042	+
8104912	SKP2	rs6881706	0.555816	1636	0.918989	-0.0066671	0.672947	0.99462	NA	0.00805745	0.156736	0.952715	NA	5	35879054	C	A	0.7059	NM_001243120	uc011cou.3	36152042	+
7964436	ARHGAP9	rs201202118	0.555967	1637	0.918989	-0.00547017	0.277653	0.951976	NA	-0.0200273	0.43322	0.974744	NA	12	57788279	A	T	0.6964	NM_001080156	uc001snz.4	57478198	-
7999440	PRM1	rs12708716	0.557065	1638	0.918989	0.00911974	0.077732	0.908035	NA	0.0439538	0.153741	0.952715	NA	16	11086016	A	G	0.6941	NM_002761	uc002dav.4	11281350	-
7999440	PRM1	rs4780346	0.557342	1639	0.918989	-0.00925534	0.0832617	0.908035	NA	0.0433759	0.788947	0.998254	NA	16	11194949	A	G	0.2618	NM_002761	uc002dav.4	11281350	-
7926037	PFKFB3	rs12722489	0.557386	1640	0.918989	-0.0178125	0.71068	0.995524	NA	0.0148602	0.774193	0.998254	NA	10	6060049	C	T	0.8647	NM_001145443	uc001ijd.4	6144933	+
7975760	EIF2B2	rs4903324	0.557838	1641	0.918989	0.0116597	0.713613	0.995524	NA	-0.0097322	0.298573	0.962732	NA	14	75495168	A	G	0.2088	NM_014239	uc001xrc.3	75002910	+
7956488	KIF5A	rs703842	0.558098	1642	0.918989	-0.00579312	0.856436	0.998203	NA	-0.0034002	0.136359	0.948749	NA	12	57768956	A	G	0.6882	NM_004984	uc001sor.2	57549997	+
7923231	RNU6-704P	rs55838263	0.558163	1643	0.918989	-0.013533	0.595532	0.99462	NA	-0.0210789	0.75853	0.998254	NA	1	200905600	A	G	0.7118	ENST00000364162	uc057oge.1	200933447	-
8102024	UBE2D3	rs7665090	0.5582	1644	0.918989	-0.00605298	0.575002	0.99462	NA	-0.0103498	0.0369751	0.936817	NA	4	102630446	G	A	0.5235	NM_181886	uc011cet.4	102827948	-
7903028	RN7SKP123	rs11810217	0.558277	1645	0.918989	-0.00997735	0.542431	0.984291	NA	0.0154011	0.646674	0.985816	NA	1	92682820	A	G	0.2706	ENST00000410732	uc057iii.1	93026251	+
8025035	ALKBH7	rs1077667	0.558506	1646	0.918989	-0.00792638	0.489974	0.968985	NA	0.014178	0.743747	0.998254	NA	19	6668961	G	A	0.7941	NM_032306	uc002meo.3	6372432	+
8025563	P2RY11	rs8112449	0.55854	1647	0.918989	0.00557499	0.0732397	0.908035	NA	0.0300914	0.115771	0.944376	NA	19	10409388	G	A	0.6353	NM_002566	uc002mnc.4	10111537	+
8015456	KLHL11	rs744166	0.558648	1648	0.918989	0.00697364	0.777644	0.99578	NA	-0.00584855	0.27913	0.962732	NA	17	42362183	G	A	0.3971	NM_018143	uc002hyf.2	41865431	-
8034099	MIR199A1	rs34536443	0.559044	1649	0.919084	-0.0409719	0.257082	0.951976	NA	-0.0550515	0.497136	0.974744	NA	19	10352442	C	G	0.97041	NR_029586	uc010xlj.1	10817496	-
8052703	WDR92	rs7592330	0.560955	1650	0.920667	-0.00758798	0.701543	0.995524	NA	-0.00890686	0.84217	0.998254	NA	2	68419651	A	G	0.5853	NM_001256476	uc002sef.3	68157482	-
8052703	WDR92	rs7595037	0.560955	1651	0.920667	-0.00758798	0.701543	0.995524	NA	-0.00890686	0.84217	0.998254	NA	2	68419963	A	G	0.5824	NM_001256476	uc002sef.3	68157482	-
7964436	ARHGAP9	rs12368653	0.561497	1652	0.920667	-0.00512642	0.289006	0.951976	NA	-0.0192519	0.475939	0.974744	NA	12	57739473	A	G	0.4765	NM_001080156	uc001snz.4	57478198	-
7923005	RN7SKP126	rs2760524	0.562649	1653	0.920667	0.0132781	0.838539	0.998203	NA	-0.00649785	0.252976	0.962732	NA	1	192561418	G	A	0.8412	ENST00000411143	uc021pgn.1	192875985	-
7923005	RN7SKP126	rs1323292	0.562649	1654	0.920667	0.0132781	0.838539	0.998203	NA	-0.00649785	0.252976	0.962732	NA	1	192571891	A	G	0.8412	ENST00000411143	uc021pgn.1	192875985	-
7997700	RN7SL381P	rs35929052	0.562789	1655	0.920667	-0.016102	0.422391	0.968985	NA	0.0281935	0.896518	0.999408	NA	16	85960878	G	A	0.8824	ENST00000577658	uc059xze.1	85659377	+
8081838	ARHGAP31	rs1131265	0.562877	1656	0.920667	0.0112475	0.472495	0.968985	NA	0.0186375	0.541789	0.974744	NA	3	119503609	C	G	0.8491	NM_020754	uc003ecj.5	119294372	+
8038309	KCNA7	rs8107548	0.562891	1657	0.920667	0.00906959	0.589669	0.99462	NA	-0.0154391	0.805011	0.998254	NA	19	49367386	G	A	0.2647	NM_031886	uc002pmg.3	49072941	-
7939068	RPS25	rs523604	0.563064	1658	0.920667	0.00489832	0.213561	0.942254	NA	0.0193946	0.840931	0.998254	NA	11	118885029	A	G	0.5353	NM_001028	uc001pun.4	119018690	-
8119052	PNPLA1	rs941816	0.563859	1659	0.921361	-0.0103139	0.193835	0.942254	NA	-0.0321952	0.657927	0.985816	NA	6	36407527	G	A	0.1912	NM_001145716	uc010jwe.2	36243202	+
8067140	CYP24A1	rs2248359	0.564392	1660	0.921361	0.00878072	0.154331	0.935905	NA	0.0368857	0.489237	0.974744	NA	20	54174979	G	A	0.6059	NM_001128915	uc002xww.3	54173649	-
8148325	RNU1-106P	rs759648	0.564797	1661	0.921361	-0.0104344	0.0381723	0.908035	NA	-0.0709985	0.487819	0.974744	NA	8	128146699	C	A	0.3059	ENST00000384382	uc064qej.1	127999130	+
7959535	OGFOD2	rs949143	0.564848	1662	0.921361	0.00531438	0.943118	0.998203	NA	0.00117227	0.594342	0.985063	NA	12	123110616	G	A	0.3176	NM_024623	uc001udz.2	122974579	+
8063019	SPINT4	rs2425752	0.565545	1663	0.921834	0.00953048	0.420111	0.968985	NA	-0.0233285	0.748556	0.998254	NA	20	46073481	A	G	0.2853	NM_178455	uc002xpe.2	45722350	+
7912102	KLHL21	rs3007421	0.565818	1664	0.921834	-0.00948739	0.853483	0.998203	NA	-0.00395731	0.195846	0.962732	NA	1	6470129	A	G	0.1294	NM_014851	uc001aoa.3	6602869	-
7956417	RNU6-879P	rs703842	0.567035	1665	0.923021	0.00837841	0.748015	0.99578	NA	-0.00796538	0.950673	0.999408	NA	12	57768956	A	G	0.6882	ENST00000364328	uc058pvk.1	57415295	+
8000910	ZNF688	rs7204270	0.567273	1666	0.923021	0.00678861	0.38594	0.968985	NA	0.0184235	0.177975	0.962732	NA	16	30145642	G	A	0.5265	NM_145271	uc002dyt.4	30572734	-
8081997	FBXO40	rs9282641	0.567839	1667	0.923021	-0.0134239	0.522113	0.975333	NA	0.0166098	0.573023	0.977379	NA	3	122077921	G	A	0.9	NM_016298	uc003eeg.3	121593118	+
7960642	ACRBP	rs12296430	0.567908	1668	0.923021	0.0060297	0.0013358	0.415197	NA	-0.0569927	0.971806	0.999408	NA	12	6394334	C	G	0.2235	NM_032489	uc001qpu.2	6647460	-
8008914	C17orf64	rs180515	0.568368	1669	0.923214	-0.00863022	0.750088	0.99578	NA	-0.00894071	0.858579	0.999383	NA	17	59946914	G	A	0.35	NM_181707	uc002iyq.4	60422508	+
7944223	KMT2A	rs533646	0.569029	1670	0.923735	-0.00504272	0.820616	0.998203	NA	-0.00374502	0.988148	0.999408	NA	11	118696037	G	C	0.6607	NM_001197104	uc001ptb.4	118436489	+
7940851	FLRT1	rs694739	0.569909	1671	0.924134	-0.00627128	0.462166	0.968985	NA	-0.0148482	0.00682901	0.893422	NA	11	64329761	A	G	0.6382	NM_013280	uc001nyi.2	64103187	+
8000791	YPEL3	rs7204270	0.570018	1672	0.924134	0.00674042	0.0960606	0.929176	NA	0.0356642	0.675568	0.990516	NA	16	30145642	G	A	0.5265	NM_031477	uc002dwl.3	30096200	-
8003583	KIF22	rs7204270	0.57073	1673	0.924134	-0.00464775	0.16027	0.935905	NA	-0.0217329	0.0175113	0.907602	NA	16	30145642	G	A	0.5265	NM_001256269	uc010vdw.2; uc002dts.5; uc059stx.1; uc059sty.1; uc059stz.1; uc059sua.1; uc059sub.1; uc059suc.1; uc059sud.1; uc059sue.1	29790718; 29790719; 29790733; 29790753; 29790970; 29796885; 29796987; 29799152; 29803399; 29803499	+
8089771	CD80	rs1132200	0.570896	1674	0.924134	-0.0130867	0.307204	0.968654	NA	-0.029722	0.48222	0.974744	NA	3	119431989	C	T	0.8706	ENST00000383669	uc010hqt.2	119557728	-
8067727	ARFRP1	rs6062314	0.570979	1675	0.924134	0.0093011	0.117164	0.929176	NA	0.0290544	0.299807	0.962732	NA	20	63778360	A	G	0.91471	NM_001134758	uc061yol.1; uc061yog.1; uc061yoh.1; uc061yok.1; uc061yon.1; uc061yom.1; uc032ppa.2; uc061yoi.1; uc032ppb.2; uc032ppe.2; uc061yoj.1; uc032ppd.2; uc032ppj.2; uc032ppc.2	63700301; 63700777; 63701388; 63706053; 63706738; 63706874; 63707658; 63707838; 63707853; 63707916; 63707996; 63708013; 63708013; 63708025	-
8119088	CDKN1A	rs941816	0.573076	1676	0.926038	-0.0123074	0.152808	0.935905	NA	-0.0473513	0.996414	0.999691	NA	6	36407527	G	A	0.1912	NM_000389	uc003omm.5	36678657	+
7922408	SNORD78	rs7592330	0.57318	1677	0.926038	-0.0143472	0.749993	0.99578	NA	-0.0151057	0.91149	0.999408	NA	2	68419651	A	G	0.5853	NR_003944	uc061jji.1; uc021vjg.1	57544534; 72760533	+
7922408	SNORD78	rs7595037	0.57318	1678	0.926038	-0.0143472	0.749993	0.99578	NA	-0.0151057	0.91149	0.999408	NA	2	68419963	A	G	0.5824	NR_003944	uc061jji.1; uc021vjg.1	57544534; 72760533	+
7923231	RNU6-704P	rs7522462	0.574245	1679	0.927206	-0.0130605	0.594117	0.99462	NA	-0.0212876	0.771902	0.998254	NA	1	200912467	G	A	0.7176	ENST00000364162	uc057oge.1	200933447	-
7949060	PPP1R14B	rs694739	0.575795	1680	0.929154	-0.00537286	0.463556	0.968985	NA	-0.0133454	0.347558	0.969371	NA	11	64329761	A	G	0.6382	NM_138689	uc001nza.4	64246941	-
8063011	WFDC10A	rs2425752	0.576492	1681	0.929727	0.00903868	0.486388	0.968985	NA	-0.0201732	0.842181	0.998254	NA	20	46073481	A	G	0.2853	NM_080753	uc002xoz.4	45629525	+
8021695	DOK6	rs763361	0.577486	1682	0.930763	0.0109462	0.671588	0.99462	NA	-0.0152837	0.215158	0.962732	NA	18	69864406	T	C	0.4912	NM_152721	uc002lkl.4	69401054	+
8067652	EEF1A2	rs6062314	0.578036	1683	0.930763	0.00776986	0.934604	0.998203	NA	-0.00130482	0.743946	0.998254	NA	20	63778360	A	G	0.91471	NM_001958	uc002yfe.3	63499315	-
7934505	C10orf55	rs2688608	0.578767	1684	0.930763	0.00960857	0.369247	0.968985	NA	0.0271291	0.49216	0.974744	NA	10	73898591	A	C	0.6147	NM_001001791	uc057ueo.1	73916642	-
8015526	KAT2A	rs9891119	0.578852	1685	0.930763	-0.00610189	0.102783	0.929176	NA	-0.0297875	0.239005	0.962732	NA	17	42355962	C	A	0.3265	NM_021078	uc002hyx.3	42121358	-
8015526	KAT2A	rs4796791	0.578852	1686	0.930763	-0.00610189	0.102783	0.929176	NA	-0.0297875	0.239005	0.962732	NA	17	42378745	A	G	0.3265	NM_021078	uc002hyx.3	42121358	-
7940315	LINC00301	rs34383631	0.579406	1687	0.931103	-0.00640229	0.0788223	0.908035	NA	0.0369339	0.522525	0.974744	NA	11	61025858	A	G	0.4676	NR_026946	uc001npt.4	60615750	+
8051812	RNU6-242P	rs2163226	0.580594	1688	0.931783	0.0285866	0.289876	0.951976	NA	-0.0795536	0.324214	0.962732	NA	2	43134117	A	G	0.7059	ENST00000384359	uc061iqj.1	43091494	-
8111524	UGT3A2	rs6897932	0.581253	1689	0.931783	-0.00804421	0.508588	0.972686	NA	-0.0160354	0.553246	0.974744	NA	5	35874473	G	A	0.7059	NM_001168316	uc011cos.3	36066882	-
8111524	UGT3A2	rs6881706	0.581253	1690	0.931783	-0.00804421	0.508588	0.972686	NA	-0.0160354	0.553246	0.974744	NA	5	35879054	C	A	0.7059	NM_001168316	uc011cos.3	36066882	-
7940996	PRDX5	rs694739	0.581852	1691	0.931783	0.00826747	0.283789	0.951976	NA	-0.0267302	0.396278	0.974744	NA	11	64329761	A	G	0.6382	NM_012094	uc001nzu.4	64318087	+
7940798	MARK2	rs694739	0.582338	1692	0.931783	0.00370705	0.603889	0.99462	NA	0.00671373	0.939243	0.999408	NA	11	64329761	A	G	0.6382	NM_001039469	uc001nxw.4	63838927	+
7967322	HCAR3	rs1790100	0.582535	1693	0.931783	-0.0226705	0.284687	0.951976	NA	0.0730254	0.485638	0.974744	NA	12	123172178	G	T	0.2324	NM_006018	uc001ucy.4	122716892	-
8119080	SRSF3	rs941816	0.583169	1694	0.931783	-0.00564909	0.750959	0.99578	NA	-0.00514324	0.334121	0.962732	NA	6	36407527	G	A	0.1912	NR_036610	uc063oei.1; uc063oej.1; uc063oek.1; uc003omj.4; uc063oel.1; uc063oem.1; uc063oen.1; uc063oeo.1	36594352; 36594366; 36594367; 36594367; 36594390; 36594591; 36599437; 36600402	+
7918026	EXTL2	rs7552544	0.583175	1695	0.931783	0.0133319	0.458495	0.968985	NA	-0.0306831	0.276621	0.962732	NA	1	100775337	A	G	0.5828	NM_001033025	uc031pnh.1; uc001dtk.3; uc001dtl.3; uc057iqy.1; uc057iqz.1; uc057ira.1; uc057irb.1	100895179; 100894812; 100895998; 100894664; 100894811; 100894681; 100894805	-
8016402	CBX1	rs4239162	0.583686	1696	0.931783	0.00524917	0.137469	0.934639	NA	0.0271919	0.037743	0.937584	NA	17	47678444	G	A	0.5059	NM_006807	uc002ind.4	48101198	-
8003230	LINC00917	rs13333054	0.583842	1697	0.931783	-0.0191421	0.220144	0.942254	NA	-0.0671174	0.806301	0.998254	NA	16	85977427	A	G	0.2235	ENST00000600892	uc010chq.3	86337556	-
8007197	NKIRAS2	rs9891119	0.584299	1698	0.931783	0.00438921	0.919678	0.998203	NA	-0.00124886	0.647797	0.985816	NA	17	42355962	C	A	0.3265	NM_001001349	uc002hyq.4	42017019	+
8007197	NKIRAS2	rs4796791	0.584299	1699	0.931783	0.00438921	0.919678	0.998203	NA	-0.00124886	0.647797	0.985816	NA	17	42378745	A	G	0.3265	NM_001001349	uc002hyq.4	42017019	+
8007208	HSPB9	rs9891119	0.584798	1700	0.931783	-0.00897853	0.84549	0.998203	NA	-0.00484828	0.573454	0.977379	NA	17	42355962	C	A	0.3265	NM_033194	uc002hyy.3	42121430	+
8007208	HSPB9	rs4796791	0.584798	1701	0.931783	-0.00897853	0.84549	0.998203	NA	-0.00484828	0.573454	0.977379	NA	17	42378745	A	G	0.3265	NM_033194	uc002hyy.3	42121430	+
8038407	RRAS	rs2303759	0.584985	1702	0.931783	-0.00714768	0.0219726	0.908035	NA	0.0591907	0.0405739	0.944376	NA	19	49365794	C	A	0.2692	NM_006270	uc002pop.2	49640201	-
8063026	RNU6ATAC38P	rs6074022	0.585422	1703	0.931931	0.00866476	0.698204	0.995524	NA	0.0105408	0.247237	0.962732	NA	20	46111557	C	T	0.2735	ENST00000408119	uc021wel.1	45778697	+
8030113	RUVBL2	rs8107548	0.586285	1704	0.93257	-0.0044413	0.307282	0.968654	NA	0.0161816	0.944503	0.999408	NA	19	49367386	G	A	0.2647	NM_006666	uc002plr.2	48993447	+
7940869	FERMT3	rs694739	0.586511	1705	0.93257	0.00312	0.972278	0.998203	NA	-0.000406901	0.377156	0.970201	NA	11	64329761	A	G	0.6382	NM_031471	uc001nym.3	64206733	+
8007348	RAMP2	rs744166	0.586951	1706	0.932722	0.00785925	0.677756	0.99462	NA	0.0104069	0.455752	0.974744	NA	17	42362183	G	A	0.3971	NM_005854	uc002ibg.5	42761193	+
8015715	BECN1	rs2293152	0.58786	1707	0.932762	-0.00557507	0.688496	0.995524	NA	0.00673378	0.640553	0.985816	NA	17	42329511	C	G	0.6235	NM_003766	uc002ibn.3	42824263	-
8035120	EPS15L1	rs1870071	0.588265	1708	0.932762	0.00546972	0.344513	0.968985	NA	0.0174165	0.119732	0.944376	NA	19	16394295	G	A	0.2882	NM_001258374	uc002ndx.5	16472012	-
7999427	TNP2	rs7191700	0.588897	1709	0.932762	-0.00671885	0.31773	0.968985	NA	0.0230175	0.71783	0.998254	NA	16	11312946	C	T	0.6627	NM_005425	uc002das.4	11269332	-
7925978	FAM208B	rs12722489	0.588986	1710	0.932762	-0.00818657	0.125577	0.932519	NA	0.0311811	0.425097	0.974744	NA	10	6060049	C	T	0.8647	NM_017782	uc001iij.3	5684837	+
7897527	UBE4B	rs10492972	0.589418	1711	0.932762	0.00458796	0.0543519	0.908035	NA	0.0278999	0.423419	0.974744	NA	1	10293054	C	T	0.3006	NM_001105562	uc001aqs.5	10033595	+
7903358	VCAM1	rs11581062	0.58944	1712	0.932762	-0.00932872	0.9831	0.999431	NA	-0.000595719	0.79638	0.998254	NA	1	100941963	G	A	0.2853	NM_001078	uc001dti.5	100719759	+
8052416	RN7SL632P	rs842639	0.589985	1713	0.932762	0.00824854	0.289417	0.951976	NA	-0.0293574	0.14266	0.950247	NA	2	60868110	A	G	0.6294	ENST00000489734	uc061jll.1	60831929	-
7967322	HCAR3	rs7132277	0.590283	1714	0.932762	-0.0223192	0.261789	0.951976	NA	0.0754496	0.685767	0.994448	NA	12	123108835	A	G	0.1941	NM_006018	uc001ucy.4	122716892	-
8007921	MYL4	rs4239162	0.590478	1715	0.932762	0.00802458	0.106786	0.929176	NA	-0.0438027	0.437159	0.974744	NA	17	47678444	G	A	0.5059	NM_001002841	uc002ilg.4	47209061	+
8111814	RPL37	rs6880778	0.590907	1716	0.932762	0.00515118	0.193847	0.942254	NA	-0.0248407	0.258929	0.962732	NA	5	40398994	G	A	0.5412	NM_000997	uc021xxr.2	40835335	-
7953508	TPI1	rs12296430	0.590951	1717	0.932762	0.00681076	0.143666	0.935905	NA	-0.0290667	0.479657	0.974744	NA	12	6394334	C	G	0.2235	NM_000365	uc058kmn.1	6867530	+
8042113	RNU1-32P	rs842639	0.591105	1718	0.932762	-0.0146817	0.531676	0.975333	NA	-0.0330119	0.932226	0.999408	NA	2	60868110	A	G	0.6294	ENST00000363937	uc061jku.1	60384604	+
8026513	TPM4	rs1870071	0.591713	1719	0.933089	-0.00538989	0.0266332	0.908035	NA	0.041324	0.598703	0.985816	NA	19	16394295	G	A	0.2882	NM_001145160	uc002ndi.3	16067506	+
8025697	ILF3	rs8112449	0.592	1720	0.933089	0.00349509	0.840618	0.998203	NA	0.00255953	0.612398	0.985816	NA	19	10409388	G	A	0.6353	NM_001137673	uc002mpm.3	10654327	+
7994620	KIF22	rs7204270	0.593626	1721	0.934581	-0.00437465	0.108756	0.929176	NA	-0.0247843	0.0275544	0.907602	NA	16	30145642	G	A	0.5265	NM_001256269	uc010vdw.2; uc002dts.5; uc059stx.1; uc059sty.1; uc059stz.1; uc059sua.1; uc059sub.1; uc059suc.1; uc059sud.1; uc059sue.1	29790718; 29790719; 29790733; 29790753; 29790970; 29796885; 29796987; 29799152; 29803399; 29803499	+
8132347	GPR141	rs60600003	0.594241	1722	0.934581	-0.0138617	0.912444	0.998203	NA	-0.00311042	0.984773	0.999408	NA	7	37342861	C	A	0.07738	NM_181791	uc003tfm.1	37740393	+
8006999	CSF3	rs12946510	0.594348	1723	0.934581	-0.00623741	0.551142	0.988938	NA	0.0134542	0.856185	0.999383	NA	17	39756124	A	G	0.4912	NM_000759	uc002htp.4	40015443	+
8034099	MIR199A1	rs8112449	0.594356	1724	0.934581	0.01475	0.296156	0.961874	NA	-0.0507625	0.745321	0.998254	NA	19	10409388	G	A	0.6353	NR_029586	uc010xlj.1	10817496	-
8074082	NCAPH2	rs470119	0.594671	1725	0.934581	0.00528463	0.454933	0.968985	NA	-0.0130012	0.0768003	0.944376	NA	22	50528485	A	G	0.3882	NM_001185011	uc003blx.5	50508259	+
7956443	MARS	rs12368653	0.595459	1726	0.934613	-0.0040613	0.196888	0.942254	NA	-0.0185324	0.411046	0.974744	NA	12	57739473	A	G	0.4765	NM_004990	uc001sog.4	57487956	+
7993259	SNN	rs4780346	0.595537	1727	0.934613	0.00739878	0.343593	0.968985	NA	-0.0201236	0.395312	0.974744	NA	16	11194949	A	G	0.2618	NM_003498	uc002dbf.5	11668413	+
7998485	C16orf91	rs2744148	0.595725	1728	0.934613	0.00804309	0.559422	0.993836	NA	0.0113021	0.477438	0.974744	NA	16	1023552	G	A	0.1559	NM_001272051	uc002clr.4	1420800	-
8089926	RN7SL172P	rs2255214	0.596358	1729	0.935065	-0.00915055	0.506349	0.972686	NA	0.0221505	0.256113	0.962732	NA	3	122051692	C	A	0.5147	ENST00000460535	uc062myk.1	121654296	-
7902992	RPAP2	rs11810217	0.599275	1730	0.938861	-0.00651227	0.564642	0.99462	NA	-0.0106406	0.0472575	0.944376	NA	1	92682820	A	G	0.2706	NM_024813	uc001dot.3	92298964	+
7940824	NAA40	rs694739	0.599472	1731	0.938861	0.00725732	0.516693	0.975079	NA	-0.0156133	0.332774	0.962732	NA	11	64329761	A	G	0.6382	NM_024771	uc009yoz.4	63938995	+
8081838	ARHGAP31	rs2293370	0.600973	1732	0.940465	0.0104997	0.454558	0.968985	NA	0.0194608	0.443089	0.974744	NA	3	119501087	G	A	0.8521	NM_020754	uc003ecj.5	119294372	+
8114171	CDKL3	rs756699	0.60119	1733	0.940465	0.00999102	0.865431	0.998203	NA	0.00424203	0.110376	0.944376	NA	5	134110884	A	G	0.8757	NM_001113575	uc003kzf.5	134367074	-
7967456	RILPL2	rs7132277	0.601851	1734	0.940886	-0.00593419	0.161988	0.935905	NA	0.0257453	0.638132	0.985816	NA	12	123108835	A	G	0.1941	NM_145058	uc001uey.2	123436717	-
7902687	CYR61	rs11587876	0.602153	1735	0.940886	-0.00793213	0.540727	0.982515	NA	-0.0146608	0.444222	0.974744	NA	1	85449500	A	G	0.7618	NM_001554	uc001dle.4	85580760	+
8030470	AP2A1	rs2303759	0.60318	1736	0.941106	0.00478096	0.112542	0.929176	NA	0.0291346	0.808685	0.998254	NA	19	49365794	C	A	0.2692	NM_014203	uc002ppn.4	49767133	+
8114709	FCHSD1	rs35952555	0.603419	1737	0.941106	0.00639543	0.143635	0.935905	NA	-0.0294717	0.632517	0.985816	NA	5	142126991	C	A	0.6029	NM_033449	uc003llk.3	141651419	-
8015490	DNAJC7	rs2293152	0.603606	1738	0.941106	0.00495631	0.23988	0.942254	NA	0.0183943	0.910519	0.999408	NA	17	42329511	C	G	0.6235	NM_001144766	uc010wgb.3	42017151	-
8033825	COL5A3	rs34536443	0.603777	1739	0.941106	-0.01218	0.529758	0.975333	NA	0.00976835	0.792374	0.998254	NA	19	10352442	C	G	0.97041	NM_015719	uc002mmq.1	10010471	-
8074063	ADM2	rs470119	0.604261	1740	0.941106	-0.00409938	0.107462	0.929176	NA	0.0232372	0.356075	0.970201	NA	22	50528485	A	G	0.3882	NM_001253845	uc003blj.4; uc011ary.3	50481555; 50481723	+
7928411	ZSWIM8	rs2688608	0.604948	1741	0.941106	-0.00435647	0.817568	0.998203	NA	-0.0038632	0.918106	0.999408	NA	10	73898591	A	C	0.6147	NM_001242487	uc009xrl.4	73785661	+
8111814	RPL37	rs4613763	0.605741	1742	0.941106	-0.0101591	0.178418	0.942254	NA	-0.0247541	0.32567	0.962732	NA	5	40392626	G	A	0.09412	NM_000997	uc021xxr.2	40835335	-
7993223	CLEC16A	rs6498184	0.605834	1743	0.941106	-0.00417346	0.926187	0.998203	NA	0.0013222	0.0550482	0.944376	NA	16	11342133	G	A	0.8235	NM_001243403	uc002dan.5	10944580	+
7998336	NARFL	rs2744148	0.605906	1744	0.941106	-0.00780436	0.152392	0.935905	NA	0.0296925	0.225452	0.962732	NA	16	1023552	G	A	0.1559	NM_022493	uc002cjr.4	741002	-
8138745	HOXA7	rs706015	0.607068	1745	0.941106	-0.00729996	0.618252	0.99462	NA	-0.0111968	0.512635	0.974744	NA	7	26975369	C	A	0.1824	NM_006896	uc003sys.4	27156677	-
8052698	C1D	rs7595717	0.607221	1746	0.941106	0.00513423	0.418927	0.968985	NA	0.0152609	0.831357	0.998254	NA	2	68360345	A	G	0.2647	NM_001190263	uc061jxu.1; uc061jxs.1; uc002seb.4; uc061jxv.1; uc061jxt.1; uc002sec.4; uc061jxw.1	68046568; 68062982; 68062983; 68062994; 68063009; 68063025; 68110948	-
8038246	TULP2	rs8107548	0.607519	1747	0.941106	-0.00714291	0.580596	0.99462	NA	0.0141004	0.376502	0.970201	NA	19	49367386	G	A	0.2647	NM_003323	uc002pkz.3	48898733	-
7964579	CTDSP2	rs12368653	0.608167	1748	0.941106	0.00346718	0.478639	0.968985	NA	-0.0101436	0.647771	0.985816	NA	12	57739473	A	G	0.4765	NM_005730	uc001sqm.4	57846739	-
7921298	FCRL2	rs3761959	0.60817	1749	0.941106	-0.00775309	0.246585	0.950096	NA	-0.0325223	0.957073	0.999408	NA	1	157699488	G	A	0.5559	NM_030764	uc001fre.3	157777122	-
8000772	FAM57B	rs7204270	0.60819	1750	0.941106	0.00601879	0.16304	0.935905	NA	-0.0280376	0.59366	0.984952	NA	16	30145642	G	A	0.5265	NM_031478	uc002dvt.4	30031259	-
8035083	CYP4F2	rs1870071	0.608278	1751	0.941106	0.00941375	0.192818	0.942254	NA	-0.0390321	0.379512	0.971536	NA	19	16394295	G	A	0.2882	NM_001082	uc002nbs.2	15898120	-
7979824	ACTN1	rs4902647	0.608518	1752	0.941106	-0.00608158	0.536469	0.978945	NA	-0.0112953	0.330519	0.962732	NA	14	68787474	G	A	0.5824	NM_001102	uc001xkl.4	68979440	-
7918902	CD58	rs2300747	0.608542	1753	0.941106	0.00665527	0.268817	0.951976	NA	-0.0192956	0.369725	0.970201	NA	1	116561593	A	G	0.8676	NM_001779	uc001egm.4	116571039	-
8071646	VPREB1	rs2283792	0.61032	1754	0.941636	0.00776279	0.517573	0.975079	NA	0.0186541	0.942461	0.999408	NA	22	21776836	C	A	0.5	NM_007128	uc002zvx.2	22244674	+
8026900	KCNN1	rs874628	0.610451	1755	0.941636	0.00466694	0.238395	0.942254	NA	0.0212663	0.649779	0.985816	NA	19	18193890	A	G	0.7	NM_002248	uc002nht.4	17951292	+
7960544	VAMP1	rs1800693	0.61063	1756	0.941636	0.00696548	0.0364902	0.908035	NA	-0.0478836	0.465471	0.974744	NA	12	6330843	G	A	0.45	NM_014231	uc001qok.4	6470677	-
7940441	PGA3	rs34383631	0.611069	1757	0.941636	0.0370931	0.46533	0.968985	NA	-0.0772042	0.922265	0.999408	NA	11	61025858	A	G	0.4676	NM_001079807	uc001nqx.4	61203379	+
8030113	RUVBL2	rs2303759	0.611133	1758	0.941636	-0.0041387	0.33081	0.968985	NA	0.0149228	0.974015	0.999408	NA	19	49365794	C	A	0.2692	NM_006666	uc002plr.2	48993447	+
8025633	PDE4A	rs8112449	0.611256	1759	0.941636	-0.00721726	0.621197	0.99462	NA	-0.0116883	0.814262	0.998254	NA	19	10409388	G	A	0.6353	NM_001111307	uc002moj.3	10420654	+
8122265	TNFAIP3	rs67297943	0.61201	1760	0.941636	-0.0175483	0.118495	0.929176	NA	0.0880077	0.721727	0.998254	NA	6	137923679	A	G	0.8118	NM_001270507	uc031spv.2; uc063rui.1; uc063ruj.1; uc003qhr.5; uc063ruk.1; uc063rul.1; uc063rum.1; uc063run.1; uc063ruo.1; uc063rup.1; uc063ruq.1	137867187; 137867213; 137867321; 137867443; 137867581; 137871210; 137871210; 137871210; 137871210; 137871210; 137875837	+
8071554	CCDC116	rs2283792	0.612049	1761	0.941636	-0.00571938	0.58869	0.99462	NA	0.012338	0.591258	0.983186	NA	22	21776836	C	A	0.5	NM_152612	uc002zve.4	21632728	+
7969792	RN7SKP9	rs4772201	0.612188	1762	0.941636	-0.00633745	0.0566126	0.908035	NA	0.0303345	0.247928	0.962732	NA	13	99434005	A	G	0.8118	ENST00000364923	uc058xzb.1	99205707	+
8063043	UBE2C	rs4810485	0.612359	1763	0.941636	0.00501558	0.445771	0.968985	NA	-0.0135057	0.847338	0.998254	NA	20	46119308	A	C	0.2706	NM_001281741	uc032pld.2	45812575	+
7902992	RPAP2	rs41286801	0.614338	1764	0.944005	-0.00702518	0.611684	0.99462	NA	-0.00971596	0.00913967	0.907602	NA	1	92509907	A	G	0.1941	NM_024813	uc001dot.3	92298964	+
8015590	STAT5B	rs9891119	0.615258	1765	0.944005	0.00417864	0.881941	0.998203	NA	0.00205047	0.488033	0.974744	NA	17	42355962	C	A	0.3265	NM_012448	uc002hzh.4	42276406	-
8015590	STAT5B	rs4796791	0.615258	1766	0.944005	0.00417864	0.881941	0.998203	NA	0.00205047	0.488033	0.974744	NA	17	42378745	A	G	0.3265	NM_012448	uc002hzh.4	42276406	-
8074030	PPP6R2	rs470119	0.615292	1767	0.944005	0.00418058	0.824329	0.998203	NA	-0.00347737	0.338074	0.962732	NA	22	50528485	A	G	0.3882	NM_001242898	uc003blc.4	50343316	+
8143749	ZNF467	rs354033	0.616393	1768	0.944233	-0.00743316	0.679794	0.99462	NA	0.0104016	0.885519	0.999408	NA	7	149592373	G	A	0.7265	NM_207336	uc003wgd.3	149773479	-
8138728	HOXA4	rs706015	0.616776	1769	0.944233	-0.00828752	0.439117	0.968985	NA	0.0196	0.317746	0.962732	NA	7	26975369	C	A	0.1824	NM_002141	uc003sym.4	27130780	-
7940341	MS4A10	rs34383631	0.61697	1770	0.944233	-0.00770938	0.830766	0.998203	NA	-0.00605066	0.790843	0.998254	NA	11	61025858	A	G	0.4676	NM_206893	uc001npz.1	60785347	+
8081431	ALCAM	rs2028597	0.617443	1771	0.944233	-0.0206776	0.269606	0.951976	NA	0.0394329	0.760273	0.998254	NA	3	105839993	G	A	0.92941	NM_001243280	uc003dvy.4	105367342	+
8007176	TTC25	rs2293152	0.618122	1772	0.944233	0.00765724	0.378746	0.968985	NA	0.0222978	0.65773	0.985816	NA	17	42329511	C	G	0.6235	NM_031421	uc032fin.2	41930655	+
8007169	KLHL10	rs2293152	0.618274	1773	0.944233	-0.00764821	0.0179061	0.908035	NA	-0.057592	0.477705	0.974744	NA	17	42329511	C	G	0.6235	NM_152467	uc010cxr.4	41837779	+
8110289	NSD1	rs4075958	0.618527	1774	0.944233	0.0040254	0.929558	0.998203	NA	-0.00125419	0.0603675	0.944376	NA	5	177357511	A	G	0.2515	NM_022455	uc003mfr.5	177133924	+
7917728	FAM69A	rs11810217	0.619833	1775	0.944233	-0.0191128	0.450451	0.968985	NA	-0.0427086	0.210745	0.962732	NA	1	92682820	A	G	0.2706	NM_001006605	uc001dpg.4	92961500	-
7904244	MAB21L3	rs2300747	0.620224	1776	0.944233	-0.0144617	0.412244	0.968985	NA	-0.0328029	0.155206	0.952715	NA	1	116561593	A	G	0.8676	NM_152367	uc001egc.1	116111754	+
7975851	IFT43	rs2300603	0.621354	1777	0.944233	-0.00852885	0.950339	0.998203	NA	0.00155381	0.759362	0.998254	NA	14	75539214	A	G	0.7456	NM_001102564	uc010asm.1	75985752	+
8110392	TMED9	rs4976646	0.62166	1778	0.944233	0.00450074	0.109963	0.929176	NA	0.0276117	0.212189	0.962732	NA	5	177361569	G	A	0.3095	NM_017510	uc003mhx.4	177592157	+
8096635	NFKB1	rs228614	0.622051	1779	0.944233	0.00462232	0.511473	0.972686	NA	-0.0116494	0.62209	0.985816	NA	4	102657480	G	A	0.5324	NM_001165412	uc011ceq.3	102501330	+
7952056	CD3D	rs533646	0.622892	1780	0.944233	0.0130861	0.0765726	0.908035	NA	-0.0837424	0.846553	0.998254	NA	11	118696037	G	C	0.6607	NM_000732	uc001pss.2	118342744	-
7976084	SPATA7	rs74796499	0.623133	1781	0.944233	-0.0154409	0.219017	0.942254	NA	-0.0343556	0.411774	0.974744	NA	14	87965984	C	A	0.95882	NM_001040428	uc001xwr.5	88385667	+
8108847	RNF14	rs35952555	0.623181	1782	0.944233	0.00791176	0.467799	0.968985	NA	0.0179281	0.035713	0.93286	NA	5	142126991	C	A	0.6029	NM_001201365	uc003llz.4	141966836	+
8089930	GOLGB1	rs9282641	0.62349	1783	0.944233	0.0087712	0.437802	0.968985	NA	0.0160847	0.576375	0.977602	NA	3	122077921	G	A	0.9	NM_001256486	uc010hrc.5	121749740	-
8034043	S1PR5	rs2288904	0.623513	1784	0.944233	-0.00514261	0.880305	0.998203	NA	-0.00239341	0.494198	0.974744	NA	19	10631494	G	A	0.7882	NM_001166215	uc002mou.3	10517931	-
7953333	CD27	rs12296430	0.623674	1785	0.944233	-0.0110266	0.0738342	0.908035	NA	-0.0608587	0.668241	0.987612	NA	12	6394334	C	G	0.2235	NM_001242	uc001qod.4	6444866	+
8047086	NAB1	rs9967792	0.623677	1786	0.944233	-0.00599005	0.838518	0.998203	NA	-0.00464845	0.0906104	0.944376	NA	2	191109709	G	A	0.6618	NM_005966	uc002usb.4	190649232	+
7923221	DDX59	rs55838263	0.625174	1787	0.944233	-0.0088941	0.67007	0.99462	NA	-0.0122745	0.0793087	0.944376	NA	1	200905600	A	G	0.7118	NM_001031725	uc009wzk.4	200669969	-
7903024	NA	rs41286801	0.625553	1788	0.944233	-0.011572	0.398366	0.968985	NA	0.0272891	0.376846	0.970201	NA	1	92509907	A	G	0.1941	NA	uc057iie.1	92846058	+
7956623	2009-03-01	rs12368653	0.625758	1789	0.944233	0.00662073	0.0945742	0.929176	NA	-0.0382291	0.602755	0.985816	NA	12	57739473	A	G	0.4765	ENST00000548358	uc001spy.4	57757486	+
8104901	IL7R	rs6897932	0.625803	1790	0.944233	0.0372731	0.0829624	0.908035	NA	-0.172976	0.65684	0.985816	NA	5	35874473	G	A	0.7059	NM_002185	uc003jjs.5	35856848	+
8104901	IL7R	rs6881706	0.625803	1791	0.944233	0.0372731	0.0829624	0.908035	NA	-0.172976	0.65684	0.985816	NA	5	35879054	C	A	0.7059	NM_002185	uc003jjs.5	35856848	+
8026610	SIN3B	rs1870071	0.62587	1792	0.944233	0.00604735	0.725459	0.99578	NA	-0.00755946	0.224263	0.962732	NA	19	16394295	G	A	0.2882	NM_015260	uc002ney.3	16829406	+
7944339	RN7SL688P	rs523604	0.626416	1793	0.944233	-0.00790793	0.770673	0.99578	NA	-0.00808607	0.536194	0.974744	NA	11	118885029	A	G	0.5353	ENST00000471754	uc058ibu.1	118931215	+
8066612	NEURL2	rs2425752	0.627528	1794	0.944233	-0.00528725	0.513432	0.972686	NA	-0.0127904	0.973906	0.999408	NA	20	46073481	A	G	0.2853	NM_001278535	uc061xjz.1; uc002xqg.3	45890476; 45891287	-
8148317	MYC	rs2019960	0.627595	1795	0.944233	-0.00755128	0.0105997	0.908035	NA	0.0666278	0.885872	0.999408	NA	8	128180025	G	A	0.2426	NM_002467	uc064qdk.2	127736068	+
8025515	RDH8	rs8112449	0.627963	1796	0.944233	0.00689442	0.572616	0.99462	NA	-0.0131021	0.405647	0.974744	NA	19	10409388	G	A	0.6353	NM_015725	uc002mmr.5	10013248	+
7999427	TNP2	rs6498184	0.628693	1797	0.944233	-0.00656613	0.340799	0.968985	NA	0.0217451	0.527373	0.974744	NA	16	11342133	G	A	0.8235	NM_005425	uc002das.4	11269332	-
8114797	SPRY4	rs35952555	0.628789	1798	0.944233	-0.0079563	0.531738	0.975333	NA	-0.0154046	0.790561	0.998254	NA	5	142126991	C	A	0.6029	NM_001127496	uc063iej.1; uc063iek.1; uc010jgi.2; uc003lml.3; uc063ieo.1	142324182; 142324417; 142325001; 142325040; 142326455	-
8025584	SNORD105	rs8112449	0.628935	1799	0.944233	-0.0170754	0.872735	0.998203	NA	-0.00940896	0.74335	0.998254	NA	19	10409388	G	A	0.6353	NR_004381	uc010dwy.1	10107650	+
8038288	CGB1	rs8107548	0.628958	1800	0.944233	0.00510654	0.0659917	0.908035	NA	-0.0351758	0.357016	0.970201	NA	19	49367386	G	A	0.2647	NM_033377	uc002plx.4	49036816	-
7917347	DDAH1	rs12087340	0.628985	1801	0.944233	0.0165924	0.631791	0.99462	NA	-0.014398	0.530745	0.974744	NA	1	85281310	A	G	0.07647	NM_001134445	uc057iag.1	85578363	-
8015526	KAT2A	rs744166	0.629189	1802	0.944233	-0.00498576	0.10216	0.929176	NA	-0.0292797	0.525217	0.974744	NA	17	42362183	G	A	0.3971	NM_021078	uc002hyx.3	42121358	-
8021418	MALT1	rs7238078	0.629372	1803	0.944233	0.00602436	0.729754	0.99578	NA	0.00634917	0.084791	0.944376	NA	18	58716960	A	C	0.7824	NM_006785	uc002lhm.3	58671385	+
7993248	RMI2	rs4780346	0.629475	1804	0.944233	0.00588407	0.648902	0.99462	NA	-0.00919875	0.963705	0.999408	NA	16	11194949	A	G	0.2618	NM_152308	uc002daw.2	11345430	+
7941062	SLC22A11	rs694739	0.630332	1805	0.944233	-0.00586462	0.600619	0.99462	NA	-0.0116939	0.21249	0.962732	NA	11	64329761	A	G	0.6382	NM_018484	uc001oai.4	64555625	+
8000702	C16orf54	rs7204270	0.630632	1806	0.944233	-0.00701031	0.327114	0.968985	NA	0.0249102	0.15351	0.952715	NA	16	30145642	G	A	0.5265	NM_175900	uc002dtp.3	29746006	-
8003601	C16orf54	rs7204270	0.630632	1807	0.944233	-0.00701031	0.327114	0.968985	NA	0.0249102	0.15351	0.952715	NA	16	30145642	G	A	0.5265	NM_175900	uc002dtp.3	29746006	-
8116994	RNU6-793P	rs17119	0.630823	1808	0.944233	0.0109536	0.773193	0.99578	NA	-0.00855936	0.257624	0.962732	NA	6	14719265	A	G	0.8	ENST00000384233	uc063lzi.1	14646534	+
7906307	KIRREL	rs2050568	0.63158	1809	0.944233	0.00429596	0.487671	0.968985	NA	-0.0115237	0.446517	0.974744	NA	1	157800451	G	A	0.5325	NM_001286349	uc001frp.4	157993272	+
8078312	CMC1	rs669607	0.632025	1810	0.944233	0.00777802	0.995584	0.999431	NA	-0.000178963	0.759794	0.998254	NA	3	28029953	C	A	0.5294	NM_182523	uc003cea.4	28241594	+
8078312	CMC1	rs1813375	0.632025	1811	0.944233	0.00777802	0.995584	0.999431	NA	-0.000178963	0.759794	0.998254	NA	3	28037080	A	C	0.5294	NM_182523	uc003cea.4	28241594	+
8078312	CMC1	rs170934	0.632025	1812	0.944233	0.00777802	0.995584	0.999431	NA	-0.000178963	0.759794	0.998254	NA	3	28037594	T	C	0.5294	NM_182523	uc003cea.4	28241594	+
8038305	NTF4	rs2303759	0.632326	1813	0.944233	0.00640418	0.302368	0.961895	NA	0.0262277	0.0456088	0.944376	NA	19	49365794	C	A	0.2692	NM_006179	uc061ayz.1	49061997	-
7940358	ZP1	rs34383631	0.632365	1814	0.944233	-0.00552854	0.0484445	0.908035	NA	-0.0399051	0.402717	0.974744	NA	11	61025858	A	G	0.4676	ENST00000537203	uc001nqe.4	60870511	+
8002266	CHTF8	rs1886700	0.632808	1815	0.944233	0.00599974	0.508646	0.972686	NA	-0.0112908	0.101872	0.944376	NA	16	68652002	A	G	0.1382	ENST00000306585	uc059wiz.1	69120570	-
8038288	CGB1	rs2303759	0.633001	1816	0.944233	0.00499176	0.0855736	0.908035	NA	-0.034178	0.322855	0.962732	NA	19	49365794	C	A	0.2692	NM_033377	uc002plx.4	49036816	-
7940431	PGA3	rs34383631	0.633656	1817	0.944233	0.0347219	0.459864	0.968985	NA	-0.0781149	0.9787	0.999408	NA	11	61025858	A	G	0.4676	NM_001079807	uc001nqx.4	61203379	+
8110347	SLC34A1	rs4976646	0.633799	1818	0.944233	0.00628867	0.412745	0.968985	NA	0.0196723	0.571658	0.977379	NA	5	177361569	G	A	0.3095	NM_003052	uc003mgk.5	177384443	+
7953892	KLRF1	rs10466829	0.633822	1819	0.944233	0.0244111	0.477831	0.968985	NA	-0.0539458	0.280539	0.962732	NA	12	9723495	A	G	0.5147	NM_001291822	uc031yub.2	9827480	+
8077169	RNU6-409P	rs470119	0.6339	1820	0.944233	0.00842872	0.854998	0.998203	NA	0.00511891	0.984791	0.999408	NA	22	50528485	A	G	0.3882	ENST00000384114	uc062foo.1	50691363	-
7959586	SNRNP35	rs7132277	0.634617	1821	0.944292	0.005744	0.213316	0.942254	NA	-0.0225494	0.192181	0.962732	NA	12	123108835	A	G	0.1941	NM_180699	uc021rfv.3	123459522	+
8015712	COA3	rs2293152	0.634637	1822	0.944292	-0.0048903	0.378678	0.968985	NA	0.0151933	0.529715	0.974744	NA	17	42329511	C	G	0.6235	NM_001040431	uc002ibl.5	42798704	-
8000903	ZNF747	rs7204270	0.635205	1823	0.944618	-0.0044344	0.122816	0.930133	NA	0.0251074	0.201391	0.962732	NA	16	30145642	G	A	0.5265	NM_023931	uc002dyn.4	30535347	-
8025672	SLC44A2	rs8112449	0.635702	1824	0.94484	-0.0080396	0.904475	0.998203	NA	-0.00350985	0.409478	0.974744	NA	19	10409388	G	A	0.6353	ENST00000586078	uc002mpg.2	10625524	+
8066569	WFDC11	rs4810485	0.636143	1825	0.944978	0.0110997	0.474451	0.968985	NA	-0.0282255	0.316003	0.962732	NA	20	46119308	A	C	0.2706	NM_147197	uc002xpa.4	45670239	-
8089930	GOLGB1	rs2255214	0.636524	1826	0.945026	0.00490794	0.43285	0.968985	NA	0.0161951	0.36035	0.970201	NA	3	122051692	C	A	0.5147	NM_001256486	uc010hrc.5	121749740	-
7940493	PPP1R32	rs650258	0.636914	1827	0.945087	0.00503795	0.854234	0.998203	NA	-0.00372913	0.317643	0.962732	NA	11	61064810	G	A	0.65	NM_001170753	uc009ynq.3	61481119	+
7964592	MIR26A2	rs12368653	0.63749	1828	0.945272	0.0116568	0.313778	0.968985	NA	0.0427249	0.304545	0.962732	NA	12	57739473	A	G	0.4765	NR_029847	uc001sqn.2	57824692	-
7993259	SNN	rs6498184	0.637736	1829	0.945272	-0.00597167	0.343899	0.968985	NA	-0.020196	0.645451	0.985816	NA	16	11342133	G	A	0.8235	NM_003498	uc002dbf.5	11668413	+
8030158	BAX	rs8107548	0.640277	1830	0.948085	0.00312595	0.284956	0.951976	NA	-0.0137641	0.757601	0.998254	NA	19	49367386	G	A	0.2647	NM_001291428	uc061axs.1; uc002plk.4; uc061axt.1; uc061axu.1; uc002plh.2; uc061axv.1; uc002plj.4; uc002pll.4; uc061axw.1; uc061axx.1; uc002plf.2; uc061axy.1; uc061axz.1	48954814; 48954876; 48954896; 48954928; 48954928; 48954928; 48954928; 48954928; 48954928; 48954928; 48954928; 48955507; 48955852	+
7903026	RNU6-210P	rs11810217	0.640336	1831	0.948085	0.00824549	0.00789923	0.908035	NA	-0.0715713	0.519854	0.974744	NA	1	92682820	A	G	0.2706	ENST00000516943	uc057iih.1	93010256	+
7923319	TMEM9	rs12122721	0.640815	1832	0.948085	0.00678484	0.480478	0.968985	NA	-0.0155047	0.724007	0.998254	NA	1	201015352	G	A	0.7029	NM_001288564	uc001gwa.5	201171574	-
8139656	GRB10	rs201847125	0.641033	1833	0.948085	-0.00937966	0.977446	0.999028	NA	0.000951925	0.651721	0.985816	NA	7	50285971	G	A	0.7012	NM_001001549	uc003tpj.3	50732353	-
8071564	MIR130B	rs2283792	0.641384	1834	0.948088	0.00681492	0.521825	0.975333	NA	0.0183935	0.579343	0.978566	NA	22	21776836	C	A	0.5	NR_029845	uc011aii.1	21653303	+
8033912	DNMT1	rs8112449	0.642855	1835	0.949392	0.00418521	0.697481	0.995524	NA	0.00645432	0.593096	0.984618	NA	19	10409388	G	A	0.6353	NM_001130823	uc010xlc.3	10195079	-
8042402	APLF	rs7595717	0.642967	1836	0.949392	-0.00726479	0.910762	0.998203	NA	-0.00319228	0.989086	0.999408	NA	2	68360345	A	G	0.2647	NM_173545	uc002sep.4	68467560	+
7944510	RNF26	rs523604	0.644578	1837	0.950218	0.0042275	0.187095	0.942254	NA	0.023395	0.300583	0.962732	NA	11	118885029	A	G	0.5353	NM_032015	uc001pwh.4	119334526	+
7999496	ZC3H7A	rs7191700	0.644664	1838	0.950218	-0.0043368	0.278937	0.951976	NA	0.0197086	0.990069	0.999548	NA	16	11312946	C	T	0.6627	NM_014153	uc002dbl.4	11797267	-
8074057	RN7SL500P	rs470119	0.644797	1839	0.950218	-0.0072485	0.941424	0.998203	NA	-0.00184388	0.00907368	0.907602	NA	22	50528485	A	G	0.3882	ENST00000470627	uc062flt.1	50371209	+
7953469	GNB3	rs12296430	0.645249	1840	0.950218	-0.00517678	0.489036	0.968985	NA	0.0127408	0.557643	0.976595	NA	12	6394334	C	G	0.2235	NM_002075	uc001qrd.3	6840210	+
8002264	RNU6-898P	rs1886700	0.646481	1841	0.950218	0.0151397	0.760056	0.99578	NA	0.0147851	0.108057	0.944376	NA	16	68652002	A	G	0.1382	ENST00000365627	uc059wiw.1	69007155	-
7917697	GFI1	rs11810217	0.646542	1842	0.950218	0.00671957	0.775008	0.99578	NA	-0.00635227	0.721724	0.998254	NA	1	92682820	A	G	0.2706	NM_001127215	uc001dou.5	92483954	-
8038309	KCNA7	rs2303759	0.646717	1843	0.950218	0.00654232	0.667797	0.99462	NA	-0.01228	0.801688	0.998254	NA	19	49365794	C	A	0.2692	NM_031886	uc002pmg.3	49072941	-
8066569	WFDC11	rs2425752	0.647364	1844	0.950218	0.0100578	0.466409	0.968985	NA	-0.028327	0.556951	0.976014	NA	20	46073481	A	G	0.2853	NM_147197	uc002xpa.4	45670239	-
8007323	CNTNAP1	rs2293152	0.64742	1845	0.950218	0.00587632	0.739874	0.99578	NA	-0.00745614	0.941777	0.999408	NA	17	42329511	C	G	0.6235	NM_003632	uc002iay.4	42682612	+
7999396	TEKT5	rs7200786	0.647938	1846	0.950218	0.00630459	0.815191	0.998203	NA	-0.00562932	0.512762	0.974744	NA	16	11083944	A	G	0.4941	NM_144674	uc002czz.2	10694945	-
8063453	PFDN4	rs2248359	0.648093	1847	0.950218	0.00777122	0.843717	0.998203	NA	0.0057659	0.172153	0.962732	NA	20	54174979	G	A	0.6059	ENST00000487129	uc061xvi.1	54208311	+
8114152	SKP1	rs756699	0.648646	1848	0.950218	0.010112	0.226231	0.942254	NA	-0.0344835	0.723872	0.998254	NA	5	134110884	A	G	0.8757	NM_006930	uc003kzd.5	134176964	-
8008029	TBX21	rs4239162	0.648732	1849	0.950218	0.00492183	0.0590204	0.908035	NA	-0.0373983	0.245417	0.962732	NA	17	47678444	G	A	0.5059	NM_013351	uc002ilv.1	47733243	+
7967358	PITPNM2	rs949143	0.649099	1850	0.950218	-0.00595787	0.189934	0.942254	NA	-0.0296345	0.620106	0.985816	NA	12	123110616	G	A	0.3176	NM_020845	uc001uej.2	123110428	-
7952200	CCDC153	rs533646	0.649152	1851	0.950218	0.00652478	0.339052	0.968985	NA	0.023802	0.767216	0.998254	NA	11	118696037	G	C	0.6607	XM_006718818	uc058ihx.1; uc058ihy.1; uc058ihz.1; uc058iia.1	119195487; 119196769; 119196769; 119195874	-
7952036	MPZL3	rs533646	0.649737	1852	0.950218	0.00659728	0.0173451	0.908035	NA	0.0628132	0.138156	0.948749	NA	11	118696037	G	C	0.6607	NM_001286152	uc009yzx.4	118252347	-
7994615	ZG16	rs7204270	0.650131	1853	0.950218	-0.00593906	0.00779402	0.908035	NA	-0.0586511	0.657933	0.985816	NA	16	30145642	G	A	0.5265	NM_152338	uc002dtr.5	29778239	+
8030437	PRMT1	rs8107548	0.650577	1854	0.950218	0.00385726	0.635392	0.99462	NA	0.00804993	0.0213287	0.907602	NA	19	49367386	G	A	0.2647	NM_001207042	uc021uxv.1	49677151	+
7992125	SOX8	rs2744148	0.650794	1855	0.950218	0.00689786	0.510501	0.972686	NA	0.0135453	0.0443352	0.944376	NA	16	1023552	G	A	0.1559	NM_014587	uc002ckn.3	981807	+
7967463	RILPL1	rs7132277	0.650849	1856	0.950218	0.0101458	0.209003	0.942254	NA	-0.0406523	0.809976	0.998254	NA	12	123108835	A	G	0.1941	NM_178314	uc001ufe.3	123533718	-
8067671	SRMS	rs6062314	0.650887	1857	0.950218	-0.00736684	0.450352	0.968985	NA	0.0138936	0.708209	0.998254	NA	20	63778360	A	G	0.91471	NM_080823	uc002yfi.3	63547504	-
7940377	TMEM132A	rs650258	0.653193	1858	0.951799	0.00322867	0.0452386	0.908035	NA	-0.0283848	0.274439	0.962732	NA	11	61064810	G	A	0.65	NM_017870	uc001nqi.4	60924480	+
7940479	TMEM216	rs34383631	0.653429	1859	0.951799	0.00575618	0.679181	0.99462	NA	0.00945663	0.0205815	0.907602	NA	11	61025858	A	G	0.4676	NM_001173990	uc010rlj.3	61391686	+
7940924	PLCB3	rs694739	0.653918	1860	0.951799	-0.00430727	0.519558	0.975333	NA	-0.0112098	0.629922	0.985816	NA	11	64329761	A	G	0.6382	NM_000932	uc009ypi.4	64251546	+
8128258	RN7SKP110	rs72928038	0.654119	1861	0.951799	0.00763437	0.824707	0.998203	NA	0.00491122	0.91061	0.999408	NA	6	90267049	A	G	0.1794	ENST00000410146	uc021zcs.1	90001506	-
7999412	TVP23A	rs7200786	0.654235	1862	0.951799	0.00669369	0.633758	0.99462	NA	0.0135219	0.477914	0.974744	NA	16	11083944	A	G	0.4941	XM_006720945	uc002dad.4; uc059qta.1; uc010uyr.2; uc059qtb.1; uc059qtc.1; uc059qte.1; uc059qtf.1; uc010buo.2; uc059qtg.1; uc059qth.1; uc059qti.1	10818607; 10818600; 10818600; 10818600; 10818600; 10774996; 10818651; 10818785; 10773441; 10775031; 10818794	-
7993195	CIITA	rs12708716	0.654281	1863	0.951799	-0.00576466	0.68779	0.995524	NA	0.00818244	0.190941	0.962732	NA	16	11086016	A	G	0.6941	NM_000246	uc002dai.5	10877197	+
8122265	TNFAIP3	rs13192841	0.655157	1864	0.951799	0.0143379	0.115923	0.929176	NA	0.089106	0.217979	0.962732	NA	6	137646077	A	G	0.2353	NM_001270507	uc031spv.2; uc063rui.1; uc063ruj.1; uc003qhr.5; uc063ruk.1; uc063rul.1; uc063rum.1; uc063run.1; uc063ruo.1; uc063rup.1; uc063ruq.1	137867187; 137867213; 137867321; 137867443; 137867581; 137871210; 137871210; 137871210; 137871210; 137871210; 137875837	+
8076998	PLXNB2	rs470119	0.655279	1865	0.951799	0.00354466	0.555712	0.992595	NA	-0.00837326	0.236068	0.962732	NA	22	50528485	A	G	0.3882	NM_012401	uc003bkv.4	50307572	-
7952069	IFT46	rs533646	0.655804	1866	0.951799	0.00554949	0.860638	0.998203	NA	0.00368378	0.430252	0.974744	NA	11	118696037	G	C	0.6607	NM_001168618	uc001ptp.2	118566076	-
7979813	ZFP36L1	rs4902647	0.655956	1867	0.951799	-0.00529185	0.702268	0.995524	NA	0.00704928	0.765593	0.998254	NA	14	68787474	G	A	0.5824	NM_001244701	uc059csy.1; uc001xkh.3; uc001xki.3; uc059cta.1; uc059ctb.1; uc059csz.1	68791243; 68793240; 68794736; 68796081; 68796214; 68796253	-
7999435	PRM2	rs7200786	0.655971	1868	0.951799	0.00615023	0.265388	0.951976	NA	-0.026541	0.0519786	0.944376	NA	16	11083944	A	G	0.4941	NM_001286356	uc002dau.2; uc032drg.2	11276480; 11276480	-
7926037	PFKFB3	rs62626317	0.656262	1869	0.951799	-0.0127862	0.732003	0.99578	NA	0.0136475	0.570609	0.977379	NA	10	6068962	A	G	0.8324	NM_001145443	uc001ijd.4	6144933	+
8116012	MXD3	rs4976646	0.656534	1870	0.951799	0.00491686	0.535249	0.978945	NA	-0.0125263	0.778435	0.998254	NA	5	177361569	G	A	0.3095	NM_001142935	uc010jkk.3	177311898	-
7980605	KCNK10	rs2119704	0.657598	1871	0.952831	-0.011836	0.809213	0.998203	NA	-0.00763096	0.453655	0.974744	NA	14	88021345	C	A	0.91471	NM_138317	uc001xwn.4	88323249	-
8089743	B4GALT4	rs2293370	0.658132	1872	0.953096	-0.00825633	0.854871	0.998203	NA	-0.00458331	0.494548	0.974744	NA	3	119501087	G	A	0.8521	NM_003778	uc003eci.4	119241103	-
7908382	RGS21	rs1359062	0.659429	1873	0.954465	-0.00783924	0.193663	0.942254	NA	-0.0321129	0.415557	0.974744	NA	1	192572342	C	G	0.8353	NM_001039152	uc001gsh.4	192316991	+
8125980	C6orf222	rs941816	0.660648	1874	0.955626	0.00652538	0.633076	0.99462	NA	-0.0104534	0.585985	0.980016	NA	6	36407527	G	A	0.1912	NM_001010903	uc003oly.4	36336885	-
8025041	CRB3	rs1077667	0.660936	1875	0.955626	-0.00594831	0.324578	0.968985	NA	0.0205025	0.578966	0.978566	NA	19	6668961	G	A	0.7941	NM_139161	uc002mfa.4	6464278	+
7964436	ARHGAP9	rs703842	0.66129	1876	0.955628	-0.00397866	0.279491	0.951976	NA	-0.0195486	0.458962	0.974744	NA	12	57768956	A	G	0.6882	NM_001080156	uc001snz.4	57478198	-
7985932	RN7SL346P	rs8042861	0.661757	1877	0.955794	0.00611815	0.874974	0.998203	NA	-0.00402899	0.0557374	0.944376	NA	15	90434101	A	C	0.4588	ENST00000491561	uc059ndm.1	90166232	+
7956426	INHBE	rs12368653	0.66241	1878	0.956227	-0.00685744	0.63467	0.99462	NA	-0.0123196	0.011309	0.907602	NA	12	57739473	A	G	0.4765	NM_031479	uc001snw.4	57455320	+
7980316	TGFB3	rs4903324	0.663309	1879	0.956619	-0.00848977	0.990654	0.999431	NA	0.000293463	0.569653	0.977379	NA	14	75495168	A	G	0.2088	NM_003239	uc001xsc.3	75981191	-
8026915	ARRDC2	rs11554159	0.663434	1880	0.956619	-0.00525588	0.260348	0.951976	NA	-0.0255899	0.965422	0.999408	NA	19	18175134	G	A	0.7235	NM_001286826	uc002nhu.4; uc060vnv.1; uc060vnw.1; uc060vnx.1; uc002nhv.3; uc060vny.1; uc060vnz.1; uc060voa.1; uc060voc.1	18001131; 18007181; 18007239; 18008167; 18008167; 18008169; 18008169; 18008169; 18009548	+
7923317	ASCL5	rs55838263	0.66374	1881	0.956619	-0.00687732	0.86315	0.998203	NA	0.004127	0.144275	0.952715	NA	1	200905600	A	G	0.7118	NM_001270601	uc031prl.1	201115372	-
8051799	HAAO	rs6718520	0.664422	1882	0.956632	-0.00533566	0.896779	0.998203	NA	-0.00266857	0.821629	0.998254	NA	2	43098432	A	G	0.4412	NM_012205	uc002rst.5	42792592	-
7911750	HES5	rs4648356	0.665194	1883	0.956632	-0.00390826	0.704027	0.995524	NA	-0.00605391	0.115577	0.944376	NA	1	2792599	C	A	0.6716	NM_001010926	uc001ajn.3	2530245	-
7897263	RNF207	rs3007421	0.667097	1884	0.956632	-0.00687279	0.8138	0.998203	NA	-0.00483465	0.197391	0.962732	NA	1	6470129	A	G	0.1294	ENST00000485539	uc001amh.4	6208617	+
7967331	VPS37B	rs1790100	0.667117	1885	0.956632	0.00553949	0.689924	0.995524	NA	-0.00727459	0.849562	0.99877	NA	12	123172178	G	T	0.2324	NM_024667	uc001udl.4	122896444	-
8074780	YPEL1	rs2283792	0.667832	1886	0.956632	0.00518296	0.455234	0.968985	NA	-0.0175965	0.790711	0.998254	NA	22	21776836	C	A	0.5	NM_013313	uc002zvl.4	21735834	-
8051814	ZFP36L2	rs2163226	0.668285	1887	0.956632	-0.00717233	0.320172	0.968985	NA	0.0252709	0.00460652	0.846137	NA	2	43134117	A	G	0.7059	NM_006887	uc002rsv.5	43226609	-
8105411	IL31RA	rs71624119	0.668702	1888	0.956632	0.0150439	0.965884	0.998203	NA	-0.00236583	0.121294	0.944376	NA	5	56144903	G	A	0.7706	NM_001242636	uc021xyq.1	55853321	+
7960700	RN7SL380P	rs12296430	0.668966	1889	0.956632	0.00711336	0.986114	0.999431	NA	-0.000436145	0.519657	0.974744	NA	12	6394334	C	G	0.2235	ENST00000461702	uc058kku.1	6784161	-
8116033	F12	rs4075958	0.669028	1890	0.956632	-0.0042466	0.0557643	0.908035	NA	-0.0356083	0.374629	0.970201	NA	5	177357511	A	G	0.2515	NM_000505	uc003mgo.5	177409576	-
8026868	RPL18A	rs11554159	0.669201	1891	0.956632	-0.00204137	0.995424	0.999431	NA	-6.92107e-05	0.803409	0.998254	NA	19	18175134	G	A	0.7235	NM_000980	uc002nhp.4	17859875	+
8015665	PLEKHH3	rs9891119	0.66955	1892	0.956632	-0.00657507	0.327122	0.968985	NA	-0.0237732	0.517884	0.974744	NA	17	42355962	C	A	0.3265	NM_024927	uc002iau.5	42676951	-
8015665	PLEKHH3	rs4796791	0.66955	1893	0.956632	-0.00657507	0.327122	0.968985	NA	-0.0237732	0.517884	0.974744	NA	17	42378745	A	G	0.3265	NM_024927	uc002iau.5	42676951	-
8026915	ARRDC2	rs874628	0.669755	1894	0.956632	-0.00499378	0.263897	0.951976	NA	-0.0254946	0.85198	0.999383	NA	19	18193890	A	G	0.7	NM_001286826	uc002nhu.4; uc060vnv.1; uc060vnw.1; uc060vnx.1; uc002nhv.3; uc060vny.1; uc060vnz.1; uc060voa.1; uc060voc.1	18001131; 18007181; 18007239; 18008167; 18008167; 18008169; 18008169; 18008169; 18009548	+
8026875	SNORA68	rs11554159	0.670281	1895	0.956632	-0.018707	0.574025	0.99462	NA	0.0448402	0.898295	0.999408	NA	19	18175134	G	A	0.7235	NR_000012	uc002nhq.1	17862587	+
8148317	MYC	rs759648	0.670431	1896	0.956632	-0.00607261	0.00982955	0.908035	NA	0.0668146	0.941545	0.999408	NA	8	128146699	C	A	0.3059	NM_002467	uc064qdk.2	127736068	+
8059648	RNY4P19	rs9989735	0.670799	1897	0.956632	0.0187731	0.623594	0.99462	NA	-0.0283675	0.670933	0.987894	NA	2	230250739	C	G	0.1737	ENST00000362530	uc061thw.1	230058324	-
8026861	B3GNT3	rs11554159	0.670819	1898	0.956632	-0.00438863	0.970974	0.998203	NA	0.000749229	0.299363	0.962732	NA	19	18175134	G	A	0.7235	NM_014256	uc002nhl.2	17795109	+
7931863	ASB13	rs2104286	0.671379	1899	0.956632	-0.00608421	0.226547	0.942254	NA	-0.0273012	0.781807	0.998254	NA	10	6057082	A	G	0.7618	NM_024701	uc001iig.3	5666578	-
7944375	TRAPPC4	rs533646	0.671932	1900	0.956632	0.00924884	0.901984	0.998203	NA	-0.00452027	0.286078	0.962732	NA	11	118696037	G	C	0.6607	NM_016146	uc010ryo.4	119018431	+
8074591	RN7SKP63	rs2283792	0.671954	1901	0.956632	-0.00672277	0.545141	0.987884	NA	-0.0191054	0.54258	0.974744	NA	22	21776836	C	A	0.5	ENST00000363187	uc021wmf.1	21389190	+
8027049	KLHL26	rs874628	0.672499	1902	0.956632	0.00370364	0.845412	0.998203	NA	0.00328991	0.108342	0.944376	NA	19	18193890	A	G	0.7	NM_018316	uc002njz.2	18636964	+
7940421	PGA3	rs34383631	0.673177	1903	0.956632	0.0306692	0.562562	0.99462	NA	-0.0617355	0.939111	0.999408	NA	11	61025858	A	G	0.4676	NM_001079807	uc001nqx.4	61203379	+
8030437	PRMT1	rs2303759	0.673263	1904	0.956632	0.00344535	0.674581	0.99462	NA	0.00718528	0.0312139	0.907602	NA	19	49365794	C	A	0.2692	NM_001207042	uc021uxv.1	49677151	+
8025633	PDE4A	rs34536443	0.673348	1905	0.956632	0.0155445	0.590579	0.99462	NA	-0.0125953	0.529715	0.974744	NA	19	10352442	C	G	0.97041	NM_001111307	uc002moj.3	10420654	+
8122222	PDE7B	rs11154801	0.674314	1906	0.956632	-0.0109312	0.164813	0.935905	NA	-0.0533756	0.838474	0.998254	NA	6	135418217	A	C	0.3971	NM_018945	uc003qgp.4	135851695	+
7999412	TVP23A	rs12927355	0.67464	1907	0.956632	-0.00723	0.59913	0.99462	NA	0.0145727	0.785973	0.998254	NA	16	11100914	G	A	0.7059	XM_006720945	uc002dad.4; uc059qta.1; uc010uyr.2; uc059qtb.1; uc059qtc.1; uc059qte.1; uc059qtf.1; uc010buo.2; uc059qtg.1; uc059qth.1; uc059qti.1	10818607; 10818600; 10818600; 10818600; 10818600; 10774996; 10818651; 10818785; 10773441; 10775031; 10818794	-
8151447	IL7	rs1520333	0.67471	1908	0.956632	0.0098303	0.494072	0.972686	NA	-0.025755	0.500018	0.974744	NA	8	78488803	G	A	0.2735	NM_000880	uc003ybg.3	78805523	-
8038261	GYS1	rs2303759	0.675403	1909	0.956632	-0.00460131	0.189804	0.942254	NA	0.028206	0.0800748	0.944376	NA	19	49365794	C	A	0.2692	NM_001161587	uc010emm.4	48993310	-
7999440	PRM1	rs6498184	0.675445	1910	0.956632	-0.00621567	0.0806214	0.908035	NA	0.0451863	0.663883	0.987612	NA	16	11342133	G	A	0.8235	NM_002761	uc002dav.4	11281350	-
7979811	RNU6-921P	rs4902647	0.675686	1911	0.956632	0.0205472	0.107894	0.929176	NA	-0.115922	0.236931	0.962732	NA	14	68787474	G	A	0.5824	ENST00000384361	uc059csx.1	68736028	-
7944302	PHLDB1	rs523604	0.67569	1912	0.956632	0.00543463	0.33812	0.968985	NA	0.0220296	0.192256	0.962732	NA	11	118885029	A	G	0.5353	NM_001144758	uc001pts.3	118607590	+
7949075	TRMT112	rs694739	0.676014	1913	0.956632	0.00512069	0.818045	0.998203	NA	-0.00493649	0.384078	0.974253	NA	11	64329761	A	G	0.6382	NM_001286082	uc031xrl.2	64317558	-
7994781	SLX1A	rs7204270	0.676535	1914	0.956632	0.00494621	0.972004	0.998203	NA	0.000739227	0.402054	0.974744	NA	16	30145642	G	A	0.5265	NM_001014999	uc002dxg.4	30193916	+
8122279	KIAA1244	rs67297943	0.676788	1915	0.956632	0.00407133	0.957864	0.998203	NA	-0.000744356	0.497494	0.974744	NA	6	137923679	A	G	0.8118	NM_020340	uc003qhu.4	138161920	+
8042413	PROKR1	rs7592330	0.677089	1916	0.956632	0.00547044	0.710791	0.995524	NA	0.00885821	0.457837	0.974744	NA	2	68419651	A	G	0.5853	NM_138964	uc010yqj.3	68643588	+
8042413	PROKR1	rs7595037	0.677089	1917	0.956632	0.00547044	0.710791	0.995524	NA	0.00885821	0.457837	0.974744	NA	2	68419963	A	G	0.5824	NM_138964	uc010yqj.3	68643588	+
8027032	C19orf60	rs874628	0.677259	1918	0.956632	0.00501575	0.105039	0.929176	NA	0.0381787	0.755898	0.998254	NA	19	18193890	A	G	0.7	NM_001100418	uc002njv.5	18588724	+
7992147	CACNA1H	rs2744148	0.677714	1919	0.956632	-0.0040562	0.227471	0.942254	NA	-0.0168487	0.19124	0.962732	NA	16	1023552	G	A	0.1559	NM_001005407	uc002ckt.4	1153240	+
8121118	CASP8AP2	rs12212193	0.678186	1920	0.956632	-0.00560853	0.151761	0.935905	NA	0.0335174	0.00411226	0.846137	NA	6	90287050	G	A	0.5148	NM_001137667	uc063qch.1; uc063qci.1; uc063qcj.1; uc063qck.1; uc063qcl.1; uc063qcm.1	89829893; 89829899; 89829899; 89829930; 89829938; 89829940	+
7897132	PRDM16	rs3748817	0.678291	1921	0.956632	-0.00431495	0.655658	0.99462	NA	-0.00778611	0.0548463	0.944376	NA	1	2594226	A	G	0.6559	NM_022114	uc001akf.4	3069210	+
8015635	PTRF	rs9891119	0.678866	1922	0.956632	0.00516024	0.71459	0.995524	NA	-0.00737419	0.442885	0.974744	NA	17	42355962	C	A	0.3265	NM_012232	uc002hzo.4	42423517	-
8015635	PTRF	rs4796791	0.678866	1923	0.956632	0.00516024	0.71459	0.995524	NA	-0.00737419	0.442885	0.974744	NA	17	42378745	A	G	0.3265	NM_012232	uc002hzo.4	42423517	-
7993223	CLEC16A	rs7200786	0.67944	1924	0.956632	0.0030954	0.948139	0.998203	NA	0.000807254	0.224951	0.962732	NA	16	11083944	A	G	0.4941	NM_001243403	uc002dan.5	10944580	+
8008064	PNPO	rs4239162	0.679862	1925	0.956632	-0.00450568	0.163684	0.935905	NA	-0.0277258	0.995495	0.999691	NA	17	47678444	G	A	0.5059	NM_018129	uc002imo.4	47941570	+
8074769	RIMBP3C	rs2283792	0.68033	1926	0.956632	-0.00706275	0.601774	0.99462	NA	-0.0176436	0.611353	0.985816	NA	22	21776836	C	A	0.5	ENST00000331505	uc062bzf.1	21550831	-
8132811	C7orf72	rs201847125	0.680752	1927	0.956632	-0.00752573	0.055952	0.908035	NA	-0.053858	0.523276	0.974744	NA	7	50285971	G	A	0.7012	NM_001161834	uc011kcj.3	50096035	+
8066549	WFDC8	rs2425752	0.681499	1928	0.956632	-0.0057516	0.900954	0.998203	NA	0.00311032	0.793146	0.998254	NA	20	46073481	A	G	0.2853	NM_130896	uc002xox.3	45579326	-
7944271	TTC36	rs523604	0.681602	1929	0.956632	-0.00530122	0.663838	0.99462	NA	-0.00983821	0.135498	0.948749	NA	11	118885029	A	G	0.5353	NM_001080441	uc001ptg.2	118527471	+
8038443	FUZ	rs8107548	0.681708	1930	0.956632	0.00349192	0.0604108	0.908035	NA	-0.0312537	0.390574	0.974744	NA	19	49367386	G	A	0.2647	NM_001171937	uc002ppu.4	49813175	-
7906671	USP21	rs35967351	0.682282	1931	0.956632	-0.00357388	0.146729	0.935905	NA	-0.0203778	0.980406	0.999408	NA	1	160742014	A	T	0.6706	NM_001014443	uc031vci.2	161159463	+
7992205	UBE2I	rs2744148	0.682651	1932	0.956632	0.00430825	0.474146	0.968985	NA	-0.0100266	0.726036	0.998254	NA	16	1023552	G	A	0.1559	XM_005255541	uc002cld.3; uc002clc.2; uc002clg.3; uc002clf.3; uc059ovj.1; uc059ovk.1; uc059ovl.1; uc059ovm.1; uc059ovn.1; uc059ovo.1; uc059ovp.1; uc059ovq.1; uc059ovr.1; uc059ovs.1; uc002clh.2; uc059ovt.1; uc059ovu.1; uc059ovv.1; uc059ovy.1	1308879; 1309152; 1309509; 1309634; 1309635; 1309647; 1309655; 1309677; 1309698; 1309757; 1309802; 1311870; 1312184; 1313559; 1313994; 1314044; 1314548; 1315324; 1319880	+
8007302	TUBG1	rs2293152	0.682765	1933	0.956632	-0.00579677	0.958982	0.998203	NA	-0.00122017	0.328228	0.962732	NA	17	42329511	C	G	0.6235	NM_001070	uc002ian.4	42609675	+
7923317	ASCL5	rs7522462	0.683356	1934	0.956632	-0.00633087	0.869744	0.998203	NA	0.00401056	0.15308	0.952715	NA	1	200912467	G	A	0.7176	NM_001270601	uc031prl.1	201115372	-
7994817	ZNF771	rs7204270	0.683371	1935	0.956632	-0.00661835	0.192711	0.942254	NA	0.0372113	0.25478	0.962732	NA	16	30145642	G	A	0.5265	NM_001142305	uc002dyd.4; uc010ver.3; uc059ted.1; uc059tee.1	30407296; 30407413; 30407628; 30408030	+
8026587	NWD1	rs1870071	0.683439	1936	0.956632	0.00508409	0.439206	0.968985	NA	-0.0175333	0.0442964	0.944376	NA	19	16394295	G	A	0.2882	NM_001007525	uc002neu.5	16719979	+
7906576	NCSTN	rs35967351	0.683562	1937	0.956632	-0.00353275	0.244857	0.948912	NA	-0.0162849	0.141809	0.949525	NA	1	160742014	A	T	0.6706	NM_001290184	uc001fvy.4	160343315	+
7959484	CCDC62	rs1790100	0.683863	1938	0.956632	0.00990824	0.10977	0.929176	NA	-0.055365	0.925467	0.999408	NA	12	123172178	G	T	0.2324	NM_201435	uc001udc.4	122774326	+
8042168	KIAA1841	rs842639	0.684379	1939	0.95686	0.00625409	0.489991	0.968985	NA	-0.0192289	0.774971	0.998254	NA	2	60868110	A	G	0.6294	NM_001129993	uc002saw.5	61065932	+
7921834	APOA2	rs35967351	0.685069	1940	0.957331	0.0076605	0.712844	0.995524	NA	-0.0121396	0.0748379	0.944376	NA	1	160742014	A	T	0.6706	NM_001643	uc001fzc.2	161223628	-
8066574	WFDC10B	rs4810485	0.685457	1941	0.95735	0.0058865	0.782005	0.99578	NA	0.00697328	0.243503	0.962732	NA	20	46119308	A	C	0.2706	NM_172006	uc002xpb.4	45705019	-
8015635	PTRF	rs744166	0.686049	1942	0.95735	0.00469985	0.704527	0.995524	NA	-0.007846	0.27947	0.962732	NA	17	42362183	G	A	0.3971	NM_012232	uc002hzo.4	42423517	-
7980296	TMED10	rs2300603	0.686538	1943	0.95735	0.00364791	0.23828	0.942254	NA	0.0166692	0.915444	0.999408	NA	14	75539214	A	G	0.7456	NM_006827	uc001xrm.2	75176631	-
7959563	C12orf65	rs1790100	0.686602	1944	0.95735	0.00488818	0.084174	0.908035	NA	0.0321092	0.515939	0.974744	NA	12	123172178	G	T	0.2324	ENST00000425637	uc001ueo.4	123233436	+
7992092	CHTF18	rs2744148	0.686848	1945	0.95735	-0.0050201	0.333026	0.968985	NA	0.0171416	0.216535	0.962732	NA	16	1023552	G	A	0.1559	NM_022092	uc002cke.4	788621	+
7959535	OGFOD2	rs7132277	0.688061	1946	0.958548	0.00435141	0.987213	0.999431	NA	0.000270992	0.251899	0.962732	NA	12	123108835	A	G	0.1941	NM_024623	uc001udz.2	122974579	+
8085999	CMTM6	rs28723576	0.688479	1947	0.958613	0.00282571	0.852882	0.998203	NA	-0.00232928	0.112139	0.944376	NA	3	32936460	A	G	0.5414	NM_017801	uc003cfa.2	32503408	-
8051820	THADA	rs6718520	0.688815	1948	0.958613	-0.00421061	0.972257	0.998203	NA	0.000586229	0.969764	0.999408	NA	2	43098432	A	G	0.4412	NM_001083953	uc002rsw.5	43595974	-
8066939	B4GALT5	rs17785991	0.68971	1949	0.959342	-0.00375835	0.647525	0.99462	NA	0.0084751	0.583122	0.978581	NA	20	49822224	A	T	0.3265	NM_004776	uc002xuu.5	49713878	-
8008029	TBX21	rs4794058	0.690047	1950	0.959342	0.00436956	0.0569479	0.908035	NA	-0.0379363	0.25636	0.962732	NA	17	47519732	A	G	0.503	NM_013351	uc002ilv.1	47733243	+
7994655	PAGR1	rs7204270	0.690454	1951	0.959416	0.00430882	0.963208	0.998203	NA	0.00086112	0.90881	0.999408	NA	16	30145642	G	A	0.5265	NM_024516	uc002dug.5	29815951	+
8041642	RNU6-958P	rs2163226	0.691846	1952	0.960136	0.0204249	0.0112662	0.908035	NA	-0.180037	0.0944637	0.944376	NA	2	43134117	A	G	0.7059	ENST00000516995	uc061iqx.1	43408306	+
8027049	KLHL26	rs11554159	0.692073	1953	0.960136	0.0034735	0.862916	0.998203	NA	0.0028627	0.0908275	0.944376	NA	19	18175134	G	A	0.7235	NM_018316	uc002njz.2	18636964	+
7948565	CYB561A3	rs34383631	0.692176	1954	0.960136	0.00393853	0.880487	0.998203	NA	-0.00265932	0.527935	0.974744	NA	11	61025858	A	G	0.4676	NM_001161452	uc001nrg.4; uc010rlh.3; uc058caj.1; uc058cak.1; uc058cal.1; uc058cam.1; uc058can.1; uc058cao.1; uc058cap.1; uc058caq.1; uc058car.1; uc058cas.1; uc058cau.1; uc009yno.3; uc058cav.1; uc058caw.1; uc058cax.1; uc058cay.1; uc058caz.1; uc058cba.1; uc058cbb.1	61362299; 61362283; 61361913; 61361913; 61351284; 61361890; 61361853; 61361849; 61357279; 61356801; 61354741; 61357347; 61361264; 61356889; 61361885; 61361840; 61361876; 61362271; 61361882; 61362262; 61362248	-
7952145	HYOU1	rs533646	0.692388	1955	0.960136	-0.00392833	0.937235	0.998203	NA	0.00150728	0.903482	0.999408	NA	11	118696037	G	C	0.6607	NM_001130991	uc031yhc.2; uc058ids.1; uc058idt.1; uc058idu.1; uc058idv.1; uc058idw.1; uc058idx.1; uc058idy.1; uc058idz.1; uc058iea.1; uc058ieb.1; uc058iec.1; uc058ied.1; uc058iee.1; uc058ief.1; uc058ieg.1; uc058ieh.1; uc058iei.1; uc058iej.1; uc058iek.1; uc058iel.1; uc058iem.1	119057137; 119057112; 119057194; 119057157; 119057137; 119057134; 119048106; 119048825; 119057139; 119056850; 119055418; 119057105; 119057024; 119057202; 119057137; 119056910; 119057175; 119057112; 119057134; 119057129; 119057142; 119057134	-
8041640	LINC01126	rs6718520	0.692771	1956	0.960175	-0.0082593	0.491105	0.968985	NA	-0.0241776	0.635686	0.985816	NA	2	43098432	A	G	0.4412	NR_027251	uc010ynx.2	43227209	+
7926021	RBM17	rs62626317	0.693856	1957	0.960801	0.00507763	0.429756	0.968985	NA	0.0142679	0.98414	0.999408	NA	10	6068962	A	G	0.8324	NM_001145547	uc010qav.3	6089345	+
8119109	C6orf89	rs941816	0.695011	1958	0.960801	0.00405565	0.888659	0.998203	NA	-0.00220884	0.678437	0.99142	NA	6	36407527	G	A	0.1912	NM_001286635	uc003omx.4	36885853	+
7998251	C16orf13	rs2744148	0.695119	1959	0.960801	-0.00488074	0.829688	0.998203	NA	-0.00376953	0.515467	0.974744	NA	16	1023552	G	A	0.1559	NM_001040162	uc002cia.3	636351	-
8089930	GOLGB1	rs1920296	0.695875	1960	0.960801	-0.00463901	0.422489	0.968985	NA	0.016496	0.86664	0.999408	NA	3	121824730	C	A	0.6088	NM_001256486	uc010hrc.5	121749740	-
7959500	HIP1R	rs7132277	0.695955	1961	0.960801	0.00476657	0.0719624	0.908035	NA	0.033526	0.375796	0.970201	NA	12	123108835	A	G	0.1941	NM_003959	uc001udj.2	122835425	+
8030158	BAX	rs2303759	0.696543	1962	0.960801	0.0026429	0.277608	0.951976	NA	-0.0140075	0.662721	0.987249	NA	19	49365794	C	A	0.2692	NM_001291428	uc061axs.1; uc002plk.4; uc061axt.1; uc061axu.1; uc002plh.2; uc061axv.1; uc002plj.4; uc002pll.4; uc061axw.1; uc061axx.1; uc002plf.2; uc061axy.1; uc061axz.1	48954814; 48954876; 48954896; 48954928; 48954928; 48954928; 48954928; 48954928; 48954928; 48954928; 48954928; 48955507; 48955852	+
8030181	CGB1	rs2303759	0.696819	1963	0.960801	0.00385132	0.273759	0.951976	NA	-0.0203404	0.442349	0.974744	NA	19	49365794	C	A	0.2692	NM_033377	uc002plx.4	49036816	-
8015572	HCRT	rs9891119	0.696903	1964	0.960801	0.00504017	0.751343	0.99578	NA	0.00666624	0.979723	0.999408	NA	17	42355962	C	A	0.3265	NM_001524	uc002hzc.1	42185452	-
8015572	HCRT	rs4796791	0.696903	1965	0.960801	0.00504017	0.751343	0.99578	NA	0.00666624	0.979723	0.999408	NA	17	42378745	A	G	0.3265	NM_001524	uc002hzc.1	42185452	-
7994804	MYLPF	rs7204270	0.697677	1966	0.960801	-0.00458359	0.14343	0.935905	NA	0.0302783	0.547288	0.974744	NA	16	30145642	G	A	0.5265	NM_013292	uc002dxv.2	30374776	+
8034101	TMED1	rs34536443	0.697781	1967	0.960801	-0.009866	0.835656	0.998203	NA	0.00374839	0.971524	0.999408	NA	19	10352442	C	G	0.97041	NM_006858	uc002mpy.5	10836290	-
8114138	C5orf15	rs756699	0.697872	1968	0.960801	-0.00735617	0.0654389	0.908035	NA	0.0470927	0.610832	0.985816	NA	5	134110884	A	G	0.8757	NM_020199	uc003kyo.4	133968787	-
8064216	RNU1-134P	rs6062314	0.697937	1969	0.960801	-0.0223298	0.528306	0.975333	NA	-0.0428029	0.836454	0.998254	NA	20	63778360	A	G	0.91471	ENST00000362935	uc061yqc.1	63908954	+
7994737	ALDOA	rs7204270	0.698368	1970	0.960801	-0.00226717	0.320971	0.968985	NA	-0.0121348	0.552827	0.974744	NA	16	30145642	G	A	0.5265	NM_000034	uc002dvx.4	30053089	+
7964466	DCTN2	rs201202118	0.69923	1971	0.960801	-0.00315215	0.0199644	0.908035	NA	-0.0334393	0.294957	0.962732	NA	12	57788279	A	T	0.6964	NM_001261412	uc058pyo.1	57547172	-
7956423	INHBC	rs201202118	0.699373	1972	0.960801	-0.00601579	0.871211	0.998203	NA	-0.00413842	0.530702	0.974744	NA	12	57788279	A	T	0.6964	NM_005538	uc001snv.3	57434759	+
8066757	SLC13A3	rs4810485	0.699699	1973	0.960801	0.00438016	0.763947	0.99578	NA	-0.00566076	0.123109	0.944376	NA	20	46119308	A	C	0.2706	NM_001011554	uc061xna.1; uc061xnb.1; uc061xnc.1; uc061xmy.1; uc002xsf.3; uc010zxw.3; uc061xmw.1; uc061xmx.1; uc002xsi.5; uc061xmz.1; uc061xnd.1	46588091; 46600616; 46613725; 46613886; 46651440; 46651459; 46670139; 46670139; 46670139; 46676075; 46684467	-
8091737	IFT80	rs1014486	0.699996	1974	0.960801	-0.00677131	0.770437	0.99578	NA	0.00875615	0.621782	0.985816	NA	3	159973324	G	A	0.4559	NM_001190241	uc003fde.3	160399273	-
7939068	RPS25	rs533646	0.7008	1975	0.960801	-0.00358563	0.444564	0.968985	NA	0.013338	0.859968	0.999383	NA	11	118696037	G	C	0.6607	NM_001028	uc001pun.4	119018690	-
7953924	CLEC9A	rs11052877	0.701775	1976	0.960801	-0.00574243	0.263648	0.951976	NA	-0.0273106	0.719636	0.998254	NA	12	9753094	G	A	0.3882	NM_207345	uc001qxa.4	10030676	+
8102024	UBE2D3	rs228614	0.702546	1977	0.960801	-0.00393134	0.573631	0.99462	NA	-0.0105037	0.230488	0.962732	NA	4	102657480	G	A	0.5324	NM_181886	uc011cet.4	102827948	-
8038319	HRC	rs2303759	0.70265	1978	0.960801	-0.00500174	0.598756	0.99462	NA	0.0132961	0.798564	0.998254	NA	19	49365794	C	A	0.2692	NM_002152	uc002pmv.4	49155424	-
8015503	ZNF385C	rs9891119	0.702771	1979	0.960801	0.00475509	0.679743	0.99462	NA	0.00853213	0.977204	0.999408	NA	17	42355962	C	A	0.3265	ENST00000496039	uc060fgh.1	42028131	-
8015503	ZNF385C	rs4796791	0.702771	1980	0.960801	0.00475509	0.679743	0.99462	NA	0.00853213	0.977204	0.999408	NA	17	42378745	A	G	0.3265	ENST00000496039	uc060fgh.1	42028131	-
8066590	TNNC2	rs2425752	0.70316	1981	0.960801	-0.00434009	0.829804	0.998203	NA	0.00458553	0.299434	0.962732	NA	20	46073481	A	G	0.2853	NM_003279	uc002xpr.4	45827341	-
7986004	ZNF774	rs8042861	0.703789	1982	0.960801	0.00509357	0.761761	0.99578	NA	0.00759683	0.997575	0.999691	NA	15	90434101	A	C	0.4588	NM_001004309	uc002bpk.5	90352244	+
8000848	CD2BP2	rs7204270	0.70408	1983	0.960801	0.0036037	0.920344	0.998203	NA	0.00167	0.0888734	0.944376	NA	16	30145642	G	A	0.5265	NM_001243646	uc002dxr.4	30354934	-
7902984	C1orf146	rs41286801	0.704501	1984	0.960801	0.00665281	0.961905	0.998203	NA	-0.00113301	0.229884	0.962732	NA	1	92509907	A	G	0.1941	NM_001012425	uc001doq.4	92217939	+
7931888	ANKRD16	rs2104286	0.704823	1985	0.960801	-0.00602763	0.52133	0.975333	NA	-0.0154967	0.924897	0.999408	NA	10	6057082	A	G	0.7618	NM_001009941	uc009xif.4	5889871	-
8109610	RNU4ATAC2P	rs11743296	0.70635	1986	0.960801	-0.0125821	0.126795	0.932519	NA	0.0651673	0.212505	0.962732	NA	5	159497075	A	G	0.1559	ENST00000408674	uc063jfp.1	159318041	+
8030199	SNRNP70	rs2303759	0.70679	1987	0.960801	0.00345739	0.33177	0.968985	NA	-0.0174112	0.0874077	0.944376	NA	19	49365794	C	A	0.2692	NM_003089	uc002pmk.4	49085422	+
8138765	HOXA11	rs706015	0.707254	1988	0.960801	-0.0057445	0.0485989	0.908035	NA	-0.0458662	0.173392	0.962732	NA	7	26975369	C	A	0.1824	NM_005523	uc003syx.4	27185216	-
7923317	ASCL5	rs12122721	0.707613	1989	0.960801	-0.00589073	0.89037	0.998203	NA	0.00335525	0.103457	0.944376	NA	1	201015352	G	A	0.7029	NM_001270601	uc031prl.1	201115372	-
8015445	NT5C3B	rs2293152	0.707847	1990	0.960801	0.0177707	0.0194072	0.908035	NA	-0.165926	0.997278	0.999691	NA	17	42329511	C	G	0.6235	NM_052935	uc021txo.2	41836263	-
7999423	SOCS1	rs7200786	0.70811	1991	0.960801	-0.00474815	0.651305	0.99462	NA	-0.0102842	0.542282	0.974744	NA	16	11083944	A	G	0.4941	NM_003745	uc002dar.2	11256179	-
8132819	IKZF1	rs201847125	0.708769	1992	0.960801	0.00359748	0.486327	0.968985	NA	0.0112969	0.752451	0.998254	NA	7	50285971	G	A	0.7012	NM_001220765	uc003tox.5	50304781	+
8110289	NSD1	rs4976646	0.708858	1993	0.960801	0.00281364	0.872919	0.998203	NA	0.00227887	0.0626134	0.944376	NA	5	177361569	G	A	0.3095	NM_022455	uc003mfr.5	177133924	+
8000899	ZNF768	rs7204270	0.709	1994	0.960801	-0.00435883	0.790474	0.996635	NA	0.00539344	0.0935231	0.944376	NA	16	30145642	G	A	0.5265	NM_024671	uc002dyk.4	30526589	-
8177130	SLC9B1	rs228614	0.709028	1995	0.960801	0.0106305	0.795904	0.997491	NA	0.0149314	0.774742	0.998254	NA	4	102657480	G	A	0.5324	NM_001100874	uc003hwu.4	103019719	-
7908614	CAMSAP2	rs12122721	0.709203	1996	0.960801	-0.0106025	0.447263	0.968985	NA	0.0331984	0.5888	0.981436	NA	1	201015352	G	A	0.7029	NM_203459	uc001gvk.4	200739557	+
8027032	C19orf60	rs11554159	0.709487	1997	0.960801	0.0046126	0.107487	0.929176	NA	0.0377662	0.988785	0.999408	NA	19	18175134	G	A	0.7235	NM_001100418	uc002njv.5	18588724	+
7967463	RILPL1	rs1790100	0.709709	1998	0.960801	0.00816063	0.222967	0.942254	NA	-0.0394689	0.598764	0.985816	NA	12	123172178	G	T	0.2324	NM_178314	uc001ufe.3	123533718	-
8078196	KCNH8	rs11719975	0.710025	1999	0.960801	-0.00585451	0.226596	0.942254	NA	-0.0299572	0.946291	0.999408	NA	3	18744093	C	G	0.2618	NM_144633	uc003cbk.2	19148453	+
[truncated: 712 more rows]

## Sheet: NK cells
Transcript Cluster ID	Gene Symbol	SNP	P-value Genotype	Rank Genotype	FDR Genotype	% Change in Expression Genotype	P-value Phenotype	FDR Phenotype All	FDR Phenotype eQTLs	% Change in Expression Phenotype	P-value Interaction	FDR Interaction All	FDR Interaction eQTLs	Chromosome	SNP Position hg38	Risk Allele	Other Allele	Risk Allele Frequency	Gene Transcript Chip Annotation	UCSC Gene Name(s)	Gene Transcription Start Site(s)	Strand	number of SNPs within 500kb of TSS	strongest eQTL	p strongest eQTL	r2 between strongest eqTL and MS risk SNP	coef.ms.snp.unadjusted	coef.ms.snp.adjusted	adjusted/unadjusted
8014903	GSDMB	rs12946510	1.03266e-39	1	2.79955e-36	-0.266483	0.8601	0.979009	0.939498	0.00891035	0.411692	0.993208	0.926308	17	39756124	A	G	0.4912	NM_001165958	uc010cwj.4	39918650	-	510	rs2313430	1.59949e-59	0.740464	-0.447098	-0.0622198	0.139164
8014916	ORMDL3	rs12946510	6.45693e-37	2	8.75237e-34	-0.2063	0.402583	0.97435	0.715929	-0.0323904	0.281109	0.984017	0.926308	17	39756124	A	G	0.4912	NM_139280	uc002htj.3	39927601	-	509	rs4065275	5.41199e-82	0.644582	-0.333334	-0.0824898	0.247469
8129728	AHI1	rs11154801	1.20301e-27	3	1.08712e-24	-0.246509	0.703822	0.976987	0.879777	-0.0165869	0.17071	0.984017	0.926308	6	135418217	A	C	0.3971	NM_001134830	uc003qgj.4	135497745	-	22	MS risk SNP	NA	1
7956631	METTL21B	rs703842	2.16055e-20	4	1.46432e-17	-0.115018	0.31151	0.97435	0.63718	-0.0231274	0.920956	0.998472	0.941887	12	57768956	A	G	0.6882	NM_015433	uc001sqg.4	57772599	+	424	rs11172344	1.10939e-20	1
7956631	METTL21B	rs201202118	2.30883e-16	5	1.25185e-13	-0.107353	0.300088	0.97435	0.63718	-0.0239538	0.808772	0.998472	0.927805	12	57788279	A	T	0.6964	NM_015433	uc001sqg.4	57772599	+	424	rs11172344	1.10939e-20	0.984955
8044417	TMEM87B	rs17174870	7.63127e-12	6	3.44806e-09	-0.0942547	0.0859731	0.879521	0.322399	0.0442375	0.874169	0.998472	0.927805	2	111907624	G	A	0.7618	NM_032824	uc002thm.2	112055222	+	14	MS risk SNP	NA	1
7928558	ZMIZ1	rs1782645	1.98851e-11	7	7.70122e-09	0.105815	0.0721157	0.858559	0.322399	-0.0557755	0.564091	0.993208	0.927805	10	79288854	A	G	0.4441	NM_020338	uc001kaf.3	79069034	+	162	rs1108618	3.73854e-12	0.857973
8089954	IQCB1	rs1920296	3.61805e-11	8	1.22607e-08	0.0938196	0.026952	0.838831	0.232665	0.0582785	0.196476	0.984017	0.926308	3	121824730	C	A	0.6088	NM_001023570	uc010hre.1	121835079	-	10	MS risk SNP	NA	1
7928558	ZMIZ1	rs1250542	1.56873e-10	9	4.72535e-08	0.111818	0.064594	0.838831	0.322399	-0.0574834	0.830538	0.998472	0.927805	10	79274913	A	G	0.3946	NM_020338	uc001kaf.3	79069034	+	162	rs1108618	3.73854e-12	0.715757	0.15292	0.0564676	0.369262
8008016	TBKBP1	rs4794058	9.76966e-10	10	2.64855e-07	0.0879065	0.256022	0.97435	0.63718	-0.0290596	0.690876	0.998472	0.927805	17	47519732	A	G	0.503	NM_014726	uc002ilu.4	47695263	+	28	MS risk SNP	NA	1
8008016	TBKBP1	rs4239162	1.39534e-09	11	3.43888e-07	0.0879136	0.229465	0.96895	0.61682	-0.0318393	0.696154	0.998472	0.927805	17	47678444	G	A	0.5059	NM_014726	uc002ilu.4	47695263	+	28	rs4794058	9.76966e-10	0.977666
7929282	HHEX	rs7923837	5.7651e-09	12	1.30243e-06	-0.155572	0.626431	0.975854	0.854225	-0.0271521	0.827297	0.998472	0.927805	10	92722160	G	A	0.6471	NM_002729	uc001kid.4	92689950	+	24	rs2497318	5.85161e-35	0.500873	0.243953	-0.0341116	changes sign
8105067	PTGER4	rs6880778	5.3472e-08	13	1.1151e-05	-0.101792	0.654553	0.975854	0.858547	0.0193245	0.495601	0.993208	0.927805	5	40398994	G	A	0.5412	NM_000958	uc003jlz.5	40679497	+	643	rs6880809	1.20832e-13	0.627656	0.154878	-0.0444933	changes sign
8125993	ETV7	rs941816	6.66231e-08	14	1.29011e-05	-0.119226	0.179237	0.96895	0.57612	-0.0517023	0.861256	0.998472	0.927805	6	36407527	G	A	0.1912	NM_001207035	uc003olz.3	36387566	-	27	rs7766404	3.97695e-11	0.345708	-0.183156	-0.0838825	0.457984
8030277	CD37	rs8107548	9.23565e-08	15	1.66919e-05	-0.0474035	0.36201	0.97435	0.694215	-0.0152105	0.666423	0.998472	0.927805	19	49367386	G	A	0.2647	NM_001040031	uc002pne.4	49335395	+	16	MS risk SNP	NA	1
8030277	CD37	rs2303759	1.40552e-07	16	2.38149e-05	-0.0469062	0.370248	0.97435	0.694215	-0.0152791	0.753326	0.998472	0.927805	19	49365794	C	A	0.2692	NM_001040031	uc002pne.4	49335395	+	16	rs8107548	9.23565e-08	0.985845
7961069	CLECL1	rs10466829	3.59616e-07	17	5.73482e-05	-0.144376	0.876865	0.979009	0.939498	-0.00856839	0.68373	0.998472	0.927805	12	9723495	A	G	0.5147	NM_001253750	uc058lav.1	9733299	-	607	rs34201389	2.73255e-14	0.0573705	0.224951	0.159048	0.707035
8025672	SLC44A2	rs2288904	4.29739e-07	18	6.47235e-05	0.0424856	0.854021	0.979009	0.939498	-0.00249489	0.153448	0.984017	0.926308	19	10631494	G	A	0.7882	ENST00000586078	uc002mpg.2	10625524	+	249	rs8106664	3.47835e-07	0.967747
8132819	IKZF1	rs201847125	4.55736e-06	19	0.000650263	0.0402354	0.0815779	0.871442	0.322399	0.0294165	0.270304	0.984017	0.926308	7	50285971	G	A	0.7012	NM_001220765	uc003tox.5	50304781	+	622	rs7781977	2.22734e-07	0.617828	-0.05691	-0.00801759	0.140882
8147019	ZC2HC1A	rs1021156	4.81972e-06	20	0.000653313	-0.142099	0.956503	0.991997	0.957224	-0.00285044	0.243759	0.984017	0.926308	8	78663569	A	G	0.2529	NM_016010	uc003ybd.4	78666046	+	686	rs1466526	3.26322e-06	0.985487
8017150	TUBD1	rs180515	6.32453e-06	21	0.000816467	-0.0513254	0.00101472	0.52529	0.0456624	0.0774018	0.354305	0.99012	0.926308	17	59946914	G	A	0.35	NM_001193609	uc002ixw.3; uc010ddf.3; uc010ddi.3; uc002ixx.3; uc010wok.3; uc060ieh.1; uc060iei.1; uc010wol.3; uc060iej.1; uc060iek.1; uc060iel.1; uc060iem.1; uc060ien.1; uc060ieo.1; uc060iep.1; uc060ieq.1	59892945; 59892945; 59892715; 59892920; 59892858; 59891003; 59891003; 59892893; 59892941; 59881148; 59892893; 59878762; 59892899; 59892935; 59892943; 59892935	-	8	MS risk SNP	NA	1
7928558	ZMIZ1	rs1250550	1.04688e-05	22	0.00129005	0.0932694	0.0279447	0.838831	0.232665	-0.0749134	0.374878	0.99012	0.926308	10	79300560	A	C	0.3588	NM_020338	uc001kaf.3	79069034	+	162	rs1108618	3.73854e-12	0.341966	0.128649	0.0334986	0.260387
7986010	IQGAP1	rs8042861	1.23677e-05	23	0.00145777	0.0268922	0.602119	0.975854	0.84673	-0.00649527	0.110268	0.984017	0.926308	15	90434101	A	C	0.4588	NM_003870	uc002bpl.2	90388217	+	10	MS risk SNP	NA	1
7921275	FCRL3	rs3761959	1.35288e-05	24	0.00151405	-0.0860521	0.859332	0.979009	0.939498	0.00739687	0.874814	0.998472	0.927805	1	157699488	G	A	0.5559	NM_052939	uc001frb.4	157700857	-	23	rs7522061	5.50927e-06	0.945655
7967412	CDK2AP1	rs949143	1.44022e-05	25	0.00151405	-0.06701	0.525196	0.97435	0.814959	-0.0183934	0.411625	0.993208	0.926308	12	123110616	G	A	0.3176	NM_001270433	uc031qjy.2; uc001ueq.5; uc058usm.1; uc058usn.1; uc058uso.1; uc058usp.1; uc058usr.1	123268254; 123272140; 123269239; 123271141; 123268077; 123272334; 123268284	-	226	rs73231928	6.45528e-07	0.774266	-0.100067	-0.0278979	0.278794
7956631	METTL21B	rs12368653	1.45206e-05	26	0.00151405	-0.0661511	0.304302	0.97435	0.63718	-0.0299614	0.512814	0.993208	0.927805	12	57739473	A	G	0.4765	NM_015433	uc001sqg.4	57772599	+	424	rs11172344	1.10939e-20	0.399893	-0.0990458	0.00974902	changes sign
8000856	TBC1D10B	rs7204270	3.49951e-05	27	0.00351377	-0.0354996	0.957224	0.992246	0.957224	0.00101532	0.576263	0.993208	0.927805	16	30145642	G	A	0.5265	NM_015527	uc002dxu.3	30370264	-	145	rs11865086	4.39594e-07	0.662963	0.0521463	0.00377744	0.0724393
7921275	FCRL3	rs2050568	3.97911e-05	28	0.00385263	-0.078638	0.667759	0.975854	0.858547	0.0186362	0.563972	0.993208	0.927805	1	157800451	G	A	0.5325	NM_052939	uc001frb.4	157700857	-	23	rs7522061	5.50927e-06	0.622604	0.11816	0.0450132	0.380952
8042391	PLEK	rs7595717	4.1509e-05	29	0.00388037	0.0495395	0.0230571	0.838831	0.232665	-0.0459815	0.11724	0.984017	0.926308	2	68360345	A	G	0.2647	NM_002664	uc002sen.5	68365172	+	295	rs7586203	2.43495e-08	0.0298344	0.0697564	0.0523582	0.750586
7967420	SBNO1	rs949143	5.73107e-05	30	0.00517898	-0.0308005	0.210507	0.96895	0.61682	-0.0192933	0.88657	0.998472	0.927805	12	123110616	G	A	0.3176	NM_001167856	uc010tap.2	123350441	-	217	rs2277343	4.38863e-05	0.799644	-0.0457856	-0.0221046	0.482785
7947815	ACP2	rs7120737	7.05244e-05	31	0.00616747	-0.078383	0.95052	0.990338	0.957224	-0.00178024	0.663918	0.998472	0.927805	11	47680843	G	A	0.1324	NM_001131064	uc001nei.3; uc058bbx.1; uc010rhg.3; uc058bby.1; uc010rhf.3; uc058bbz.1; uc010rhe.3; uc058bca.1; uc058bcb.1; uc058bcc.1; uc058bcd.1; uc058bce.1; uc010rhj.3; uc058bcf.1	47248906; 47245576; 47248802; 47248816; 47248819; 47248814; 47248628; 47244960; 47248814; 47248840; 47245378; 47248805; 47248816; 47248814	-	15	rs3824866	2.28745e-18	0.474639	-0.117761	0.053843	changes sign
8035435	KIAA1683	rs874628	0.00010732	32	0.00909202	-0.0482832	0.285683	0.97435	0.63718	-0.0249529	0.435693	0.993208	0.927805	19	18193890	A	G	0.7	NM_001145304	uc010ebn.3	18274509	-	300	rs60170051	4.41869e-08	0.0710675	0.0713958	0.0487203	0.682396
7911754	TNFRSF14	rs4648356	0.000134877	33	0.0110804	-0.0349721	0.453078	0.97435	0.728161	0.0146472	0.0250068	0.984017	0.926308	1	2792599	C	A	0.6716	XR_430632	uc057bni.1; uc057bnj.1; uc057bnk.1; uc057bnl.1; uc057bnm.1; uc001ajr.4; uc057bnn.1; uc057bno.1; uc057bnp.1; uc057bnq.1; uc057bnr.1; uc057bns.1; uc057bnt.1; uc057bnu.1; uc057bnv.1; uc057bnw.1	2555638; 2555790; 2555801; 2555979; 2556221; 2556365; 2556385; 2556404; 2556405; 2556556; 2556570; 2557812; 2559579; 2560553; 2560681; 2561800	+	272	rs10752745	1.96768e-07	0.40664	0.0513574	0.00400335	0.0779507
7959549	ARL6IP4	rs7132277	0.000212584	34	0.0169504	-0.0446066	0.0642223	0.838831	0.322399	0.0326964	0.71069	0.998472	0.927805	12	123108835	A	G	0.1941	NM_001002251	uc001ued.5; uc001uee.4; uc058uqh.1; uc001uec.5; uc058uqi.1; uc001uef.5; uc058uqj.1; uc058uqk.1; uc009zxt.5; uc058uql.1; uc058uqm.1; uc058uqn.1; uc058uqo.1; uc058uqp.1; uc058uqq.1; uc058uqr.1; uc058uqs.1; uc058uqt.1; uc058uqu.1; uc058uqv.1	122980059; 122980059; 122980178; 122980188; 122980190; 122980190; 122980230; 122980262; 122980494; 122980681; 122980695; 122980702; 122980715; 122980720; 122980732; 122980747; 122980927; 122981136; 122981139; 122981952	+	231	rs1727317	6.31575e-05	0.778651	-0.0658332	-0.0136221	0.206919
8108861	NDFIP1	rs35952555	0.000246887	35	0.0185471	-0.0429412	0.788944	0.979009	0.939498	-0.00532803	0.344887	0.99012	0.926308	5	142126991	C	A	0.6029	NM_030571	uc003lmi.5	142108504	+	329	rs6863411	2.57195e-05	0.95103
7939751	NR1H3	rs7120737	0.000250988	36	0.0185471	0.0551694	0.172292	0.968392	0.57612	0.030325	0.668172	0.998472	0.927805	11	47680843	G	A	0.1324	NM_001130101	uc001nen.5	47257997	+	15	rs3824866	4.71019e-05	0.474639	0.0774747	0.0300217	0.387503
7911754	TNFRSF14	rs3748817	0.000253133	37	0.0185471	-0.0343465	0.424084	0.97435	0.715929	0.0154758	0.13598	0.984017	0.926308	1	2594226	A	G	0.6559	XR_430632	uc057bni.1; uc057bnj.1; uc057bnk.1; uc057bnl.1; uc057bnm.1; uc001ajr.4; uc057bnn.1; uc057bno.1; uc057bnp.1; uc057bnq.1; uc057bnr.1; uc057bns.1; uc057bnt.1; uc057bnu.1; uc057bnv.1; uc057bnw.1	2555638; 2555790; 2555801; 2555979; 2556221; 2556365; 2556385; 2556404; 2556405; 2556556; 2556570; 2557812; 2559579; 2560553; 2560681; 2561800	+	272	rs10752745	1.96768e-07	0.366149	0.0504225	0.000863299	0.0171213
8017150	TUBD1	rs8070345	0.000383339	38	0.0273482	-0.0377861	0.00671413	0.64696	0.151068	0.0667902	0.967096	0.998472	0.967096	17	59739396	A	G	0.5059	NM_001193609	uc002ixw.3; uc010ddf.3; uc010ddi.3; uc002ixx.3; uc010wok.3; uc060ieh.1; uc060iei.1; uc010wol.3; uc060iej.1; uc060iek.1; uc060iel.1; uc060iem.1; uc060ien.1; uc060ieo.1; uc060iep.1; uc060ieq.1	59892945; 59892945; 59892715; 59892920; 59892858; 59891003; 59891003; 59892893; 59892941; 59881148; 59892893; 59878762; 59892899; 59892935; 59892943; 59892935	-	8	rs180515	6.32453e-06	0.484571	0.0555704	0.00851914	0.153303
7999427	TNP2	rs7191700	0.000417128	39	0.0289958	-0.0345258	0.233021	0.96895	0.61682	-0.0235964	0.855254	0.998472	0.927805	16	11312946	C	T	0.6627	NM_005425	uc002das.4	11269332	-	996	MS risk SNP	NA	1
7940959	GPR137	rs694739	0.000435608	40	0.0295233	0.0361441	0.808628	0.979009	0.939498	0.00397669	0.356242	0.99012	0.926308	11	64329761	A	G	0.6382	NM_001170726	uc010rni.3	64284338	+	17	MS risk SNP	NA	1
7959549	ARL6IP4	rs949143	0.000613417	41	0.0404248	-0.0315644	0.0692952	0.84511	0.322399	0.0334523	0.848517	0.998472	0.927805	12	123110616	G	A	0.3176	NM_001002251	uc001ued.5; uc001uee.4; uc058uqh.1; uc001uec.5; uc058uqi.1; uc001uef.5; uc058uqj.1; uc058uqk.1; uc009zxt.5; uc058uql.1; uc058uqm.1; uc058uqn.1; uc058uqo.1; uc058uqp.1; uc058uqq.1; uc058uqr.1; uc058uqs.1; uc058uqt.1; uc058uqu.1; uc058uqv.1	122980059; 122980059; 122980178; 122980188; 122980190; 122980190; 122980230; 122980262; 122980494; 122980681; 122980695; 122980702; 122980715; 122980720; 122980732; 122980747; 122980927; 122981136; 122981139; 122981952	+	231	rs1727317	6.31575e-05	0.495069	-0.0462719	-0.0162856	0.351953
8035435	KIAA1683	rs11554159	0.000626278	42	0.0404248	-0.0419999	0.429557	0.97435	0.715929	-0.0190028	0.0713692	0.984017	0.926308	19	18175134	G	A	0.7235	NM_001145304	uc010ebn.3	18274509	-	300	rs60170051	4.41869e-08	0.0412184	0.0619023	0.0420554	0.679383
8015642	PSMC3IP	rs9891119	0.000808605	43	0.0497799	0.0473757	0.56607	0.97435	0.821715	0.0145413	0.366421	0.99012	0.926308	17	42355962	C	A	0.3265	NM_001256014	uc002iaj.5	42577697	-	322	rs963987	0.000134399	0.643989	0.0667275	0.0162036	0.242832
8015642	PSMC3IP	rs4796791	0.000808605	44	0.0497799	0.0473757	0.56607	0.97435	0.821715	0.0145413	0.366421	0.99012	0.926308	17	42378745	A	G	0.3265	NM_001256014	uc002iaj.5	42577697	-	322	rs963987	0.000134399	0.643989	0.0667275	0.0162036	0.242832
7976080	GPR65	rs2119704	0.000826298	45	0.0497799	0.0692166	0.031022	0.838831	0.232665	0.0500948	0.225059	0.984017	0.926308	14	88021345	C	A	0.91471	NM_003608	uc001xvv.3	88005123	+	713	rs10147587	9.75529e-06	0.807075
8015642	PSMC3IP	rs744166	0.000985459	46	0.0580778	0.0447408	0.616204	0.975854	NA	0.0127491	0.79339	0.998472	NA	17	42362183	G	A	0.3971	NM_001256014	uc002iaj.5	42577697	-
7897620	PGD	rs10492972	0.0010506	47	0.0605998	-0.0380555	0.285548	0.97435	NA	0.0207327	0.523569	0.993208	NA	1	10293054	C	T	0.3006	NM_002631	uc001arc.4	10399079	+
8089928	RNU4-62P	rs1920296	0.001251	48	0.0706557	0.0538157	0.594982	0.975854	NA	-0.016629	0.482729	0.993208	NA	3	121824730	C	A	0.6088	ENST00000410125	uc062myl.1	121655604	-
8016371	SCRN2	rs4794058	0.00136066	49	0.0752807	0.0343515	0.0338453	0.838831	NA	0.0447359	0.968686	0.998472	NA	17	47519732	A	G	0.503	NM_001145023	uc002imf.4	47841289	-
8110327	RGS14	rs4976646	0.00157126	50	0.0848981	-0.024481	0.861917	0.979009	NA	-0.00270014	0.774454	0.998472	NA	5	177361569	G	A	0.3095	NM_006480	uc003mgf.4	177357836	+
8016371	SCRN2	rs4239162	0.00159712	51	0.0848981	0.0337141	0.0312126	0.838831	NA	0.0443908	0.948876	0.998472	NA	17	47678444	G	A	0.5059	NM_001145023	uc002imf.4	47841289	-
8017148	RNU6-450P	rs180515	0.00184846	52	0.0940506	-0.0579398	0.0624661	0.838831	NA	-0.0703416	0.599113	0.993208	NA	17	59946914	G	A	0.35	ENST00000364654	uc060ieg.1	59847544	-
8052721	PPP3R1	rs7592330	0.00187338	53	0.0940506	0.0239058	0.268317	0.97435	NA	-0.0183149	0.190538	0.984017	NA	2	68419651	A	G	0.5853	NM_000945	uc002sei.2	68252531	-
8052721	PPP3R1	rs7595037	0.00187338	54	0.0940506	0.0239058	0.268317	0.97435	NA	-0.0183149	0.190538	0.984017	NA	2	68419963	A	G	0.5824	NM_000945	uc002sei.2	68252531	-
8078448	RN7SL296P	rs28723576	0.00190919	55	0.0941059	0.0728851	0.144094	0.945206	NA	0.057504	0.629555	0.998472	NA	3	32936460	A	G	0.5414	ENST00000585237	uc062hwp.1	33103007	+
8102065	BDH2	rs228614	0.00214674	56	0.103925	0.0655856	0.782885	0.979009	NA	0.0104424	0.192061	0.984017	NA	4	102657480	G	A	0.5324	NM_020139	uc003hwz.4	103099883	-
8035177	SLC35E1	rs1870071	0.00241	57	0.114623	0.0269551	0.511345	0.97435	NA	-0.0106541	0.135224	0.984017	NA	19	16394295	G	A	0.2882	ENST00000409648	uc060uzs.1	16571536	-
7912040	TNFRSF25	rs3007421	0.00245426	58	0.114715	-0.0621618	0.927799	0.989181	NA	0.00273737	0.779028	0.998472	NA	1	6470129	A	G	0.1294	NM_001039664	uc057buq.1; uc057bur.1; uc001anh.4; uc057bus.1; uc057but.1; uc001ane.4; uc001anf.4; uc001ang.4; uc001ana.4; uc057buu.1; uc057buv.1; uc057buw.1; uc057bux.1; uc057buy.1; uc057buz.1; uc057bva.1; uc057bvb.1; uc057bvc.1; uc057bvd.1; uc057bve.1	6463622; 6466099; 6466175; 6466175; 6466175; 6466195; 6466175; 6466107; 6466107; 6466107; 6466107; 6466107; 6466107; 6463347; 6462607; 6465272; 6465630; 6466107; 6466099; 6465858	-
8000811	MAPK3	rs7204270	0.00255735	59	0.117508	-0.0376996	0.633681	0.975854	NA	-0.0116555	0.357055	0.99012	NA	16	30145642	G	A	0.5265	NM_001040056	uc032dxc.2	30123209	-
8082003	EAF2	rs1920296	0.00262505	60	0.118608	0.0450584	0.0841319	0.874581	NA	-0.0465976	0.411821	0.993208	NA	3	121824730	C	A	0.6088	NM_018456	uc003een.4	121835214	+
7949075	TRMT112	rs694739	0.00273552	61	0.121243	-0.0500982	0.770727	0.979009	NA	0.00811311	0.903048	0.998472	NA	11	64329761	A	G	0.6382	NM_001286082	uc031xrl.2	64317558	-
8007212	STAT5A	rs744166	0.0027728	62	0.121243	-0.0267825	0.870638	0.979009	NA	-0.00309862	0.579337	0.993208	NA	17	42362183	G	A	0.3971	NM_001288718	uc010cya.3	42287866	+
7939738	DDB2	rs7120737	0.00292276	63	0.125772	-0.0378849	0.689032	0.975854	NA	-0.00749145	0.773761	0.998472	NA	11	47680843	G	A	0.1324	NM_000107	uc001neb.3	47214941	+
8038326	SLC6A16	rs2303759	0.00321044	64	0.135992	-0.0362037	0.171502	0.968392	NA	-0.0312193	0.475974	0.993208	NA	19	49365794	C	A	0.2692	NM_014037	uc002pmz.4	49325225	-
8110327	RGS14	rs4075958	0.00342119	65	0.14269	-0.0228054	0.867625	0.979009	NA	-0.00273976	0.958041	0.998472	NA	5	177357511	A	G	0.2515	NM_006480	uc003mgf.4	177357836	+
8089771	CD80	rs2293370	0.00379363	66	0.15407	0.0512946	0.16089	0.957297	NA	-0.0373757	0.98795	0.998472	NA	3	119501087	G	A	0.8521	ENST00000383669	uc010hqt.2	119557728	-
8147012	PKIA	rs1021156	0.00386075	67	0.15407	-0.0704007	0.86146	0.979009	NA	0.00765216	0.129431	0.984017	NA	8	78663569	A	G	0.2529	NM_006823	uc010lzo.4; uc003ybb.4; uc003yba.4	78591230; 78516354; 78516138	+
8089771	CD80	rs1131265	0.00386454	68	0.15407	0.0520454	0.16042	0.957297	NA	-0.0373517	0.967408	0.998472	NA	3	119503609	C	G	0.8491	ENST00000383669	uc010hqt.2	119557728	-
8042391	PLEK	rs7592330	0.00414622	69	0.158612	0.0297009	0.074814	0.858559	NA	-0.0379342	0.787789	0.998472	NA	2	68419651	A	G	0.5853	NM_002664	uc002sen.5	68365172	+
8042391	PLEK	rs7595037	0.00414622	70	0.158612	0.0297009	0.074814	0.858559	NA	-0.0379342	0.787789	0.998472	NA	2	68419963	A	G	0.5824	NM_002664	uc002sen.5	68365172	+
8023766	RTTN	rs763361	0.00415399	71	0.158612	0.0350058	0.96078	0.992665	NA	-0.00120468	0.0296394	0.984017	NA	18	69864406	T	C	0.4912	NM_173630	uc002lkp.4	70205945	-
7912292	LZIC	rs10492972	0.00422634	72	0.159133	0.0360619	0.6861	0.975854	NA	0.00783996	0.233281	0.984017	NA	1	10293054	C	T	0.3006	NM_032368	uc001aqm.4	9942768	-
7964548	METTL1	rs703842	0.00436591	73	0.160334	0.0633793	0.234464	0.96895	NA	-0.0456853	0.218684	0.984017	NA	12	57768956	A	G	0.6882	NM_005371	uc010ssd.3	57772793	-
8000738	KCTD13	rs7204270	0.0044679	74	0.160334	0.0316464	0.408912	0.97435	NA	0.018262	0.545203	0.993208	NA	16	30145642	G	A	0.5265	NM_178863	uc002duv.5	29927035	-
8052747	BMP10	rs7592330	0.00459365	75	0.160334	0.0443489	0.913291	0.987214	NA	0.00346345	0.898187	0.998472	NA	2	68419651	A	G	0.5853	NM_014482	uc002sez.1	68871517	-
8052747	BMP10	rs7595037	0.00459365	76	0.160334	0.0443489	0.913291	0.987214	NA	0.00346345	0.898187	0.998472	NA	2	68419963	A	G	0.5824	NM_014482	uc002sez.1	68871517	-
7967412	CDK2AP1	rs7132277	0.00465433	77	0.160334	-0.0587604	0.487924	0.97435	NA	-0.0207021	0.291126	0.984017	NA	12	123108835	A	G	0.1941	NM_001270433	uc031qjy.2; uc001ueq.5; uc058usm.1; uc058usn.1; uc058uso.1; uc058usp.1; uc058usr.1	123268254; 123272140; 123269239; 123271141; 123268077; 123272334; 123268284	-
8089771	CD80	rs1132200	0.00468065	78	0.160334	0.055942	0.173296	0.968673	NA	-0.0364895	0.886543	0.998472	NA	3	119431989	C	T	0.8706	ENST00000383669	uc010hqt.2	119557728	-
7967412	CDK2AP1	rs1790100	0.00471308	79	0.160334	-0.056714	0.546614	0.97435	NA	-0.0177859	0.311587	0.987217	NA	12	123172178	G	T	0.2324	NM_001270433	uc031qjy.2; uc001ueq.5; uc058usm.1; uc058usn.1; uc058uso.1; uc058usp.1; uc058usr.1	123268254; 123272140; 123269239; 123271141; 123268077; 123272334; 123268284	-
7911701	MORN1	rs4648356	0.00473136	80	0.160334	0.026692	0.212769	0.96895	NA	0.0244415	0.611722	0.994337	NA	1	2792599	C	A	0.6716	XM_006710906	uc001ajb.2; uc009vld.4; uc001ajd.2; uc057bls.1; uc057blu.1; uc057blv.1; uc057blw.1; uc010nyy.3; uc057blx.1; uc057bly.1; uc057blz.1	2391707; 2391687; 2391707; 2375878; 2387529; 2385121; 2388337; 2391671; 2388509; 2388316; 2389996	-
7902957	EPHX4	rs41286801	0.00496056	81	0.163608	-0.132797	0.773371	0.979009	NA	0.0211693	0.915361	0.998472	NA	1	92509907	A	G	0.1941	NM_173567	uc001don.3	92029981	+
[truncated: 2,630 more rows]

## Sheet: B cells
Transcript Cluster ID	Gene Symbol	SNP	P-value Genotype	Rank Genotype	FDR Genotype	% Change in Expression Genotype	P-value Phenotype	FDR Phenotype All	FDR Phenotype eQTLs	% Change in Expression Phenotype	P-value Interaction	FDR Interaction All	FDR Interaction eQTLs	Chromosome	SNP Position hg38	Risk Allele	Other Allele	Risk Allele Frequency	Gene Transcript Chip Annotation	UCSC Gene Name(s)	Gene Transcription Start Site(s)	Strand	number of SNPs within 500kb of TSS	strongest eQTL	p strongest eQTL	r2 between strongest eQTL and MS risk SNP	coef.ms.snp.unadjusted	coef.ms.snp.adjusted	adjusted/unadjusted
[truncated: 2,711 more rows]

[truncated: 2 more sheets: CD4 cells, CD8 cells]
