# Supplementary material for: Multiple sclerosis risk variants regulate gene expression in innate and adaptive immune cells
Source: Life Sci Alliance. 2020 Jun 9;3(7):e202000650. doi: 10.26508/lsa.202000650 (PMC7283543; doi:10.26508/lsa.202000650)
Supplement: Supplementary file 6 [file LSA-2020-00650_Supplemental_Data_6.xlsx]

## Sheet: Monocytes, all
Transcript Cluster ID	p Value	Rank	False Discovery Rate	est. % diff in expression	Gene Name	Control Gene	Chromosome(s)	Hg38 Transcription Start Site(s)	Hg38 Strand	MS Risk SNPs within 500kb
8105545	2.38575e-05	1	0.699289	0.100163	IPO11	FALSE	chr5	62418883	+	NA
8090688	6.49389e-05	2	0.699289	-0.108309	SNORA58	FALSE	chr1 chr3	53771153; 154259726; 131479233	-	NA
8146336	8.11789e-05	3	0.699289	-0.06986	SPIDR	FALSE	chr8	47260574	+	NA
8153868	0.000114844	4	0.699289	0.0573534	C8orf82	FALSE	chr8	144529092	-	NA
7895267	0.000132976	5	0.699289	-0.0748887	NA	FALSE	NA	NA	NA	NA
7893310	0.00014447	6	0.699289	-0.250936	NA	FALSE	NA	NA	NA	NA
8156935	0.000147011	7	0.699289	0.0922759	ZNF189	FALSE	chr9	101399088; 101398872; 101399027; 101399027	+	NA
8127502	0.00021727	8	0.794774	0.0936177	LINC00472	FALSE	chr6	71420103; 71420266; 71420769; 71420261; 71420267; 71420267	-	NA
8118824	0.000255086	9	0.794774	-0.0717968	NA	FALSE	NA	NA	NA	NA
7893650	0.000263427	10	0.794774	-0.0618097	NA	FALSE	NA	NA	NA	NA
8016033	0.000274154	11	0.794774	0.0961703	FAM171A2	FALSE	chr17	44363875	-	NA
8005951	0.000315881	12	0.794774	0.130807	SNORD42B	FALSE	chr17	28720549	+	NA
8165398	0.000332613	13	0.794774	-0.077871	FUT7	FALSE	chr9	137033010	-	NA
8013035	0.000334169	14	0.794774	0.0938951	ZNF624	FALSE	chr17	16653853	-	NA
8169868	0.000361537	15	0.802539	0.0676813	UTP14A	FALSE	NA	NA	NA	NA
7936817	0.000416001	16	0.821036	0.0923215	C10orf88	FALSE	chr10	122954403	-	NA
8080773	0.000424553	17	0.821036	0.0828766	RPP14	FALSE	chr3	58306261	+	NA
7958011	0.000462103	18	0.821036	-0.121115	NA	FALSE	NA	NA	NA	NA
8023703	0.000533521	19	0.821036	-0.0894111	LINC00305	FALSE	chr18	64149030	-	NA
7892671	0.000545978	20	0.821036	-0.22013	NA	FALSE	NA	NA	NA	NA
7960514	0.000647508	21	0.821036	-0.126893	NA	FALSE	NA	NA	NA	NA
8160647	0.000740967	22	0.821036	-0.0505207	BAG1	FALSE	chr9	33264571	-	NA
7896433	0.000766925	23	0.821036	0.247964	NA	FALSE	NA	NA	NA	NA
7937979	0.000807208	24	0.821036	-0.0804003	OR51T1	FALSE	chr11	4881818	+	NA
7978403	0.000807941	25	0.821036	-0.0778711	NA	FALSE	NA	NA	NA	NA
8088828	0.00082926	26	0.821036	-0.0864389	RNA5SP136	FALSE	chr3	72691811	-	NA
7996934	0.000833704	27	0.821036	0.0633271	NIP7	FALSE	chr16	69339796	+	NA
7928444	0.000842396	28	0.821036	-0.0595058	VCL	FALSE	chr10	73998113	+	rs2688608
7960642	0.000940662	29	0.821036	-0.056739	ACRBP	FALSE	chr12	6647460	-	rs12296430; rs1800693
8046169	0.000988568	30	0.821036	0.0772505	PPIG	FALSE	chr2	169584339	+	NA
8030950	0.00108174	31	0.821036	0.128054	ZNF701	FALSE	chr19	52570663	+	NA
7892878	0.00108215	32	0.821036	-0.122574	NA	FALSE	NA	NA	NA	NA
8003578	0.00110516	33	0.821036	-0.0710506	ZG16	FALSE	chr16	29778239	+	rs7204270
8003953	0.0012552	34	0.821036	-0.0553776	PSMB6	FALSE	chr17	4796143	+	NA
8043322	0.0012673	35	0.821036	0.0969261	ANAPC1P1	FALSE	NA	NA	NA	NA
8125775	0.00135204	36	0.821036	-0.0571909	UQCC2	FALSE	chr6	33711727	-	NA
8055279	0.00136232	37	0.821036	-0.119625	NA	FALSE	NA	NA	NA	NA
8099107	0.00137655	38	0.821036	0.0833353	LYAR	FALSE	chr4	4290021	-	NA
7997489	0.0013964	39	0.821036	0.0748592	PLCG2	FALSE	chr16	81779257	+	NA
7993167	0.00144565	40	0.821036	-0.104382	ATF7IP2	FALSE	chr16	10386054	+	NA
7894709	0.0014529	41	0.821036	-0.0765645	NA	FALSE	NA	NA	NA	NA
7975459	0.00151121	42	0.821036	-0.0691647	SIPA1L1	FALSE	chr14	71529324	+	NA
7990231	0.00152593	43	0.821036	-0.0447983	ADPGK	FALSE	chr15	72783785	-	NA
8123642	0.00153517	44	0.821036	-0.0821078	RNA5SP201	FALSE	chr6	3088809	-	NA
7937404	0.00156471	45	0.821036	-0.073674	LOC692247	FALSE	NA	NA	NA	NA
8094190	0.00156608	46	0.821036	-0.0843486	CC2D2A	FALSE	chr4	15469929	+	NA
7984475	0.00158872	47	0.821036	-0.0759646	CORO2B	FALSE	chr15	68616539	+	NA
8118861	0.00159436	48	0.821036	-0.118027	NA	FALSE	NA	NA	NA	NA
7984261	0.00159504	49	0.821036	-0.118023	NA	FALSE	NA	NA	NA	NA
7974471	0.00159532	50	0.821036	-0.0885676	NA	FALSE	NA	NA	NA	NA
8133788	0.00159627	51	0.821036	0.059672	PTPN12	FALSE	chr7	77538034	+	NA
8055085	0.00160728	52	0.821036	-0.103427	RNY4P7	FALSE	chr2	127798998	-	NA
7957495	0.00164543	53	0.821036	-0.0816057	NA	FALSE	NA	NA	NA	NA
8085946	0.001671	54	0.821036	-0.0620284	EOMES	FALSE	chr3	27722312	-	rs11129295; rs170934; rs1813375; rs2371108; rs669607
7899323	0.00171667	55	0.821036	-0.0618774	SYTL1	FALSE	chr1	27342040	+	NA
8116859	0.00172281	56	0.821036	-0.06836	TMEM14C	FALSE	chr6	10722914	+	NA
8180236	0.00179696	57	0.821036	0.121979	NA	FALSE	NA	NA	NA	NA
8180265	0.00179696	58	0.821036	0.121979	NA	FALSE	NA	NA	NA	NA
7964460	0.00180268	59	0.821036	-0.0876083	DDIT3	FALSE	chr12	57520492; 57520517; 57517743; 57520517; 57520511; 57520511; 57520511	-	rs12368653; rs201202118; rs703842
7972899	0.00181207	60	0.821036	-0.051178	LOC101928841	FALSE	NA	NA	NA	NA
8175621	0.00185716	61	0.821036	0.0728403	TMEM185A	FALSE	NA	NA	NA	NA
8040473	0.00187162	62	0.821036	-0.102039	RHOB	FALSE	chr2	20447073	+	NA
7916944	0.001877	63	0.821036	-0.051012	PTGER3	FALSE	chr1	71047788	-	NA
7894975	0.00189567	64	0.821036	-0.0872103	NA	FALSE	NA	NA	NA	NA
7928685	0.00190833	65	0.821036	-0.0677256	DYDC2	FALSE	chr10	80356767	+	NA
8048749	0.00191909	66	0.821036	-0.0753072	KCNE4	FALSE	chr2	223051813	+	NA
7895151	0.00194457	67	0.821036	-0.288161	NA	FALSE	NA	NA	NA	NA
7921031	0.00194693	68	0.821036	-0.174574	NA	FALSE	NA	NA	NA	NA
7963024	0.00195787	69	0.821036	-0.0527056	LMBR1L	FALSE	chr12	49110898	-	NA
8139107	0.00196283	70	0.821036	-0.115879	TRGV9	FALSE	chr7	38318861	-	NA
8063636	0.00196344	71	0.821036	-0.0371179	STX16	FALSE	chr20	58651282	+	NA
8055913	0.00197787	72	0.821036	0.0486807	PRPF40A	FALSE	chr2	152717981	-	NA
7963054	0.00199097	73	0.821036	-0.0720849	TUBA1A	FALSE	chr12	49188899	-	NA
8139460	0.00199775	74	0.821036	0.0583882	NACAD	FALSE	chr7	45088914	-	NA
8064322	0.00200434	75	0.821036	-0.0750064	C20orf96	FALSE	chr20	290778	-	NA
7895407	0.00201918	76	0.821036	-0.236292	NA	FALSE	NA	NA	NA	NA
8017150	0.00202	77	0.821036	0.0870781	TUBD1	FALSE	chr17	59892945; 59892945; 59892715; 59892920; 59892858; 59891003; 59891003; 59892893; 59892941; 59881148; 59892893; 59878762; 59892899; 59892935; 59892943; 59892935	-	rs180515; rs8070345
7966266	0.00206892	78	0.821036	-0.0997872	RN7SL441P	FALSE	chr12	109866509	-	NA
8143040	0.00207072	79	0.821036	0.0582303	SLC35B4	FALSE	chr7	134317051	-	NA
8002020	0.00210477	80	0.821036	-0.133953	TPPP3	FALSE	chr16	67391953	-	NA
8159977	0.00211465	81	0.821036	-0.0995869	RLN2	FALSE	chr9	5304432; 5304969	-	NA
7895277	0.00211616	82	0.821036	0.0531224	NA	FALSE	NA	NA	NA	NA
7975224	0.00212515	83	0.821036	0.0444311	EIF2S1	FALSE	chr14	67359996	+	NA
8014679	0.00214084	84	0.821036	-0.0460755	SRCIN1	FALSE	chr17	38605930	-	NA
7908966	0.00214133	85	0.821036	-0.0994719	LINC00260	FALSE	NA	NA	NA	NA
8089759	0.00219361	86	0.821036	0.0716415	TMEM39A	FALSE	chr3	119463682	-	rs1131265; rs1132200; rs2293370
8127822	0.00221489	87	0.821036	-0.100481	RNU6-130P	FALSE	chr6	82210440	-	NA
8150862	0.00225571	88	0.821036	-0.140062	NA	FALSE	chr8	55902855	-	NA
8134316	0.00226163	89	0.821036	-0.0815729	RNU6-1328P	FALSE	chr7	94495298	+	NA
8140534	0.00226293	90	0.821036	-0.133075	SEMA3C	FALSE	chr7	80919351	-	NA
7972745	0.00231097	91	0.821036	0.0792108	IRS2	FALSE	chr13	109786568	-	NA
7895057	0.00237601	92	0.821036	0.0384299	NA	FALSE	NA	NA	NA	NA
8102904	0.00238955	93	0.821036	0.0762621	UCP1	FALSE	chr4	140568805	-	NA
8006445	0.00244651	94	0.821036	-0.0661603	CCL11	FALSE	chr17	34285667	+	NA
7967586	0.00246863	95	0.821036	-0.0706373	RPL22P19	FALSE	NA	NA	NA	NA
8144857	0.00254948	96	0.821036	0.0877224	NAT1	FALSE	chr8	18210092	+	NA
8145782	0.00257219	97	0.821036	0.0756822	MAK16	FALSE	chr8	33484749	+	NA
7909306	0.00263645	98	0.821036	-0.0826908	C4BPB	FALSE	chr1	207089237	+	NA
8144512	0.00264173	99	0.821036	-0.0988236	RNU6-682P	FALSE	chr8	8895812	+	NA
7965760	0.00266548	100	0.821036	0.126939	DEPDC4	FALSE	chr12	100267079	-	NA
7895498	0.00267751	101	0.821036	-0.098696	NA	FALSE	NA	NA	NA	NA
8170286	0.00270302	102	0.821036	0.0845046	RN7SKP81	FALSE	NA	NA	NA	NA
8146448	0.00270918	103	0.821036	0.0700994	MRPL15	FALSE	chr8	54135209	+	NA
7895340	0.00273564	104	0.821036	-0.0842524	NA	FALSE	NA	NA	NA	NA
7892733	0.00274739	105	0.821036	-0.203617	NA	FALSE	NA	NA	NA	NA
8038782	0.00274974	106	0.821036	0.0629031	CTU1	FALSE	chr19	51108370	-	NA
8002802	0.00278423	107	0.821036	0.046465	WDR59	FALSE	chr16	74985148	-	NA
7892928	0.00279472	108	0.821036	-0.0590855	NA	FALSE	NA	NA	NA	NA
8068057	0.00279799	109	0.821036	-0.0850691	LINC00161	FALSE	chr21	28539317	+	NA
7988563	0.00281002	110	0.821036	-0.0652719	SHC4	FALSE	chr15	48963444	-	NA
8065256	0.00282414	111	0.821036	0.0493562	CRNKL1	FALSE	chr20	20038452; 20038611; 20052466; 20056046; 20056046; 20056046; 20056046	-	NA
8109403	0.00283406	112	0.821036	0.0731788	MFAP3	FALSE	chr5	154038958	+	NA
8072355	0.0028572	113	0.821036	-0.0881474	NA	FALSE	NA	NA	NA	NA
8075061	0.00294234	114	0.821036	-0.10122	RNA5SP495	FALSE	chr22	26390776	-	NA
7984077	0.0029429	115	0.821036	-0.0587822	MIR190A	FALSE	chr15	62823956	+	NA
7922297	0.00294504	116	0.821036	-0.0716884	RNU6-290P	FALSE	chr1	171418750	-	NA
8019071	0.00296978	117	0.821036	0.0771553	LOC100294362	FALSE	NA	NA	NA	NA
8150212	0.00297521	118	0.821036	-0.1297	RNU6-533P	FALSE	chr8	36309690	-	NA
8111915	0.00297802	119	0.821036	0.112472	SEPP1	FALSE	chr5	42811892	-	NA
7970287	0.00299031	120	0.821036	0.0438614	LAMP1	TRUE	chr13	113297240	+	NA
8012841	0.00299914	121	0.821036	-0.20199	NA	FALSE	NA	NA	NA	NA
8180316	0.00300827	122	0.821036	0.101482	NA	FALSE	NA	NA	NA	NA
8144378	0.00303445	123	0.821449	0.0707451	AGPAT5	FALSE	chr8	6708356	+	NA
7895817	0.00310499	124	0.823665	-0.0675705	NA	FALSE	NA	NA	NA	NA
7895632	0.003112	125	0.823665	0.0774625	NA	FALSE	NA	NA	NA	NA
7926677	0.00311685	126	0.823665	-0.0813404	OTUD1	FALSE	chr10	23439457	+	NA
7996117	0.00321791	127	0.8388	-0.0643914	CCDC135	FALSE	chr16	57694799	+	NA
7925972	0.00322451	128	0.8388	0.0618441	CALML3	FALSE	chr10	5524008	+	NA
7923177	0.00328207	129	0.847156	-0.0827453	RNU6-716P	FALSE	chr1	200008607	-	NA
8165682	0.00337241	130	0.858666	0.182751	MT-TS2	FALSE	NA	NA	NA	NA
7893781	0.00338608	131	0.858666	-0.095172	NA	FALSE	NA	NA	NA	NA
8180317	0.00342632	132	0.858666	0.0897821	NA	FALSE	NA	NA	NA	NA
7896416	0.00345241	133	0.858666	-0.0805048	NA	FALSE	NA	NA	NA	NA
8069666	0.0034556	134	0.858666	-0.0652043	RNU6-123P	FALSE	chr21	25943145	-	NA
7895681	0.00351235	135	0.862081	-0.141221	NA	FALSE	NA	NA	NA	NA
7893794	0.00355227	136	0.862081	-0.15373	NA	FALSE	NA	NA	NA	NA
7956281	0.00357414	137	0.862081	-0.0576282	GPR182	FALSE	chr12	56994445	+	NA
8112664	0.00365645	138	0.862081	-0.063551	NA	FALSE	chr5	74882783	-	NA
7895665	0.00373055	139	0.862081	0.0677122	NA	FALSE	NA	NA	NA	NA
8104746	0.00375452	140	0.862081	-0.0662667	NPR3	FALSE	chr5	32711722	+	NA
8124430	0.00375643	141	0.862081	-0.0941708	HIST1H1D	FALSE	chr6	26234933	-	NA
8138088	0.0037745	142	0.862081	-0.0662299	FAM220A	FALSE	chr7	6348959	-	NA
8047377	0.00382671	143	0.862081	0.086549	RNU6-1206P	FALSE	chr2	201079841	+	NA
7893831	0.00382981	144	0.862081	-0.0824188	NA	FALSE	NA	NA	NA	NA
7893247	0.00383348	145	0.862081	-0.055281	NA	FALSE	NA	NA	NA	NA
8170443	0.00389248	146	0.862081	-0.0516245	MTMR1	FALSE	NA	NA	NA	NA
7988346	0.00393257	147	0.862081	-0.0772113	RNU1-78P	FALSE	chr15	45003028	-	NA
8069532	0.00394257	148	0.862081	0.0604873	HSPA13	FALSE	chr21	14383187	-	NA
8086028	0.00394784	149	0.862081	-0.0433208	GLB1	FALSE	chr3	33097230	-	rs28723576
8013572	0.00400133	150	0.862081	-0.0998084	NA	FALSE	NA	NA	NA	NA
7910111	0.00401792	151	0.862081	-0.0810392	EPHX1	FALSE	chr1	225825353	+	NA
8039769	0.00403438	152	0.862081	0.0720633	NA	FALSE	NA	NA	NA	NA
8173581	0.00403817	153	0.862081	-0.0721015	RNU1-112P	FALSE	NA	NA	NA	NA
7983189	0.00404446	154	0.862081	-0.196318	NA	FALSE	NA	NA	NA	NA
8039075	0.00405114	155	0.862081	-0.155857	VN1R4	FALSE	chr19	53267723	-	NA
8132589	0.00405209	156	0.862081	-0.042098	NA	FALSE	NA	NA	NA	NA
8063242	0.00409219	157	0.862081	0.0495377	ARFGEF2	FALSE	chr20	48921889	+	NA
7895297	0.00411038	158	0.862081	-0.0808452	NA	FALSE	NA	NA	NA	NA
7893266	0.00412482	159	0.862081	0.0540806	NA	FALSE	NA	NA	NA	NA
8088128	0.00415004	160	0.862081	0.0494592	DCP1A	FALSE	chr3	53347525	-	NA
8029321	0.00416839	161	0.862081	0.102726	ZNF283	FALSE	chr19	43827291	+	NA
8060997	0.00420994	162	0.863568	0.0717138	SPTLC3	FALSE	chr20	13008986	+	NA
7893561	0.00422745	163	0.863568	0.060011	NA	FALSE	NA	NA	NA	NA
7895713	0.00427636	164	0.868231	-0.195239	NA	FALSE	NA	NA	NA	NA
8043028	0.00431576	165	0.870921	-0.107337	NA	FALSE	NA	NA	NA	NA
8131292	0.00438753	166	0.878059	0.0679005	RBAK	FALSE	chr7	5045820	+	NA
7952810	0.00440388	167	0.878059	-0.150443	IGSF9B	FALSE	chr11	133956754	-	NA
8054395	0.00443797	168	0.879589	-0.0563167	UXS1	FALSE	chr2	106194339	-	NA
8125835	0.00449384	169	0.885394	-0.034645	RPS10	TRUE	chr6	34425221; 34425580; 34425784; 34426026; 34426125; 34426041; 34426050	-	NA
7895324	0.00457404	170	0.895892	-0.0507742	NA	FALSE	NA	NA	NA	NA
7956989	0.00462132	171	0.89986	0.0709444	MDM2	FALSE	chr12	68809016	+	NA
7894762	0.00466726	172	0.902073	-0.160706	NA	FALSE	NA	NA	NA	NA
7948418	0.00473552	173	0.902073	0.0844426	OR10V1	FALSE	chr11	59713864	-	NA
8046788	0.00473986	174	0.902073	-0.106274	NA	FALSE	NA	NA	NA	NA
7994058	0.00481313	175	0.902073	0.0730786	SCNN1G	FALSE	chr16	23182714	+	NA
7978401	0.00481323	176	0.902073	-0.0794863	NA	FALSE	NA	NA	NA	NA
8041617	0.00485569	177	0.902073	0.0689033	MTA3	FALSE	chr2	42494568	+	NA
8169697	0.00488354	178	0.902073	0.0815929	NA	FALSE	NA	NA	NA	NA
8055143	0.00488936	179	0.902073	0.0841233	FAR2P1	FALSE	NA	NA	NA	NA
8040413	0.00490203	180	0.902073	-0.0915541	RNU5E-7P	FALSE	chr2	15864934	+	NA
7930148	0.0049036	181	0.902073	0.0861592	SFXN2	FALSE	chr10	102714539	+	NA
7920141	0.00495492	182	0.902496	0.0589162	TCHH	FALSE	chr1	152115454	-	NA
7903010	0.00496011	183	0.902496	0.0405581	RPL5	TRUE	chr1	92832024	+	rs11810217; rs41286801
8154523	0.00501036	184	0.906684	-0.0461624	RRAGA	TRUE	chr9	19049394	+	NA
8119842	0.00506782	185	0.909146	0.0587597	POLR1C	FALSE	chr6	43517021	+	NA
8058905	0.00510295	186	0.909146	0.223117	CXCR1	FALSE	chr2	218166995	-	NA
8095269	0.00511544	187	0.909146	0.0413128	POLR2B	FALSE	chr4	56978942	+	NA
8114898	0.00515758	188	0.909146	-0.092263	PPP2R2B	FALSE	chr5	146878642	-	NA
8107096	0.0051656	189	0.909146	-0.0553799	NA	FALSE	NA	NA	NA	NA
7892519	0.00518779	190	0.909146	-0.0979164	NA	FALSE	NA	NA	NA	NA
7995440	0.00523518	191	0.912173	-0.0639246	FLJ44674	FALSE	NA	NA	NA	NA
8149705	0.00525985	192	0.912173	-0.0499903	MIR320A	FALSE	chr8	22245043	-	NA
8006112	0.00529128	193	0.91287	0.0525835	NSRP1	FALSE	chr17	30116806	+	NA
7895184	0.00539238	194	0.914572	-0.147272	NA	FALSE	NA	NA	NA	NA
8097628	0.00541302	195	0.914572	0.0805912	HHIP	FALSE	chr4	144646020	+	NA
7998033	0.00553861	196	0.914572	-0.0328978	TCF25	TRUE	chr16	89873611	+	NA
7896596	0.00557269	197	0.914572	0.0588842	NA	FALSE	NA	NA	NA	NA
7995479	0.00558252	198	0.914572	0.0522028	PAPD5	FALSE	chr16	50152917; 50153793; 50154160; 50214225	+	NA
8180318	0.00559185	199	0.914572	0.0895028	NA	FALSE	NA	NA	NA	NA
8062211	0.00563882	200	0.914572	0.0645326	RPF2	FALSE	chr6	110982014; 110982014; 110982049; 110982315	+	NA
8147501	0.00564807	201	0.914572	-0.135402	NA	FALSE	NA	NA	NA	NA
7896518	0.00567254	202	0.914572	-0.180396	NA	FALSE	NA	NA	NA	NA
7948906	0.0056842	203	0.914572	0.1163	SNORD27	FALSE	chr11	62855083	-	NA
7955297	0.00570143	204	0.914572	0.0520701	AQP5	FALSE	chr12	49961869	+	NA
8043861	0.00571265	205	0.914572	0.0500186	EIF5B	FALSE	chr2	99337352	+	NA
8017827	0.00571872	206	0.914572	-0.0912089	NA	FALSE	NA	NA	NA	NA
7903171	0.00580384	207	0.914572	-0.064579	RWDD3	FALSE	chr1	95234210	+	NA
8094874	0.00582107	208	0.914572	-0.0604002	NA	FALSE	NA	NA	NA	NA
8097955	0.0058354	209	0.914572	-0.0958146	NA	FALSE	NA	NA	NA	NA
8095894	0.00586737	210	0.914572	0.0720015	MRPL1	FALSE	chr4	77862519	+	NA
7972442	0.00592669	211	0.914572	-0.0770005	RN7SKP8	FALSE	chr13	98204192	-	NA
7894208	0.00593653	212	0.914572	-0.188742	NA	FALSE	NA	NA	NA	NA
8055247	0.00600215	213	0.914572	-0.0601873	NA	FALSE	NA	NA	NA	NA
7959312	0.00601544	214	0.914572	-0.0954858	TMEM120B	FALSE	chr12	121712794	+	NA
8107113	0.00606322	215	0.914572	0.0981895	NA	FALSE	NA	NA	NA	NA
8103289	0.00608591	216	0.914572	0.0491342	PLRG1	FALSE	chr4	154550397	-	NA
8180378	0.0060943	217	0.914572	0.0710237	NA	FALSE	NA	NA	NA	NA
8173745	0.00610658	218	0.914572	0.0639057	CYSLTR1	FALSE	NA	NA	NA	NA
7988124	0.00610804	219	0.914572	0.0686045	PPIP5K1	FALSE	chr15	43590253	-	NA
8019939	0.00610911	220	0.914572	0.0639025	TGIF1	FALSE	chr18	3451676	+	NA
8168994	0.00612646	221	0.914572	-0.0893045	NA	FALSE	NA	NA	NA	NA
7981726	0.00614575	222	0.914572	-0.14915	LOC101930405	FALSE	NA	NA	NA	NA
7903026	0.00615204	223	0.914572	-0.0714118	RNU6-210P	FALSE	chr1	93010256	+	rs11810217
7916928	0.00615263	224	0.914572	0.0616719	ANKRD13C	FALSE	chr1	70354722	-	NA
8148317	0.00625851	225	0.92614	0.0707895	MYC	TRUE	chr8	127736068	+	rs2019960; rs4410871; rs759648
7892505	0.00628608	226	0.92614	-0.187582	NA	FALSE	NA	NA	NA	NA
8054437	0.00636874	227	0.927836	0.0834461	ANAPC1P1	FALSE	NA	NA	NA	NA
8147988	0.00643918	228	0.927836	0.216325	NA	FALSE	NA	NA	NA	NA
8044191	0.00644848	229	0.927836	-0.0658792	SLC5A7	FALSE	chr2	107986538	+	NA
8116530	0.00651852	230	0.927836	0.0680503	SNORD96A	FALSE	chr5	181241892	-	NA
7909992	0.00652761	231	0.927836	0.0512552	FBXO28	FALSE	chr1	224114110	+	NA
8073379	0.00655952	232	0.927836	-0.0538756	L3MBTL2	FALSE	chr22	41205204	+	NA
7894198	0.00656467	233	0.927836	-0.0385411	NA	FALSE	NA	NA	NA	NA
7937728	0.00658875	234	0.927836	-0.0595349	TNNI2	FALSE	chr11	1839480	+	NA
8125919	0.00659704	235	0.927836	0.152216	FKBP5	FALSE	chr6	35728583	-	NA
8090676	0.0066231	236	0.927836	0.0985264	NA	FALSE	NA	NA	NA	NA
8019231	0.00662335	237	0.927836	-0.059498	PDE6G	FALSE	chr17	81656583	-	NA
8133360	0.00664559	238	0.927836	0.0678852	CLDN4	FALSE	chr7	73830862	+	NA
7920382	0.00666006	239	0.927836	0.046756	CRTC2	FALSE	chr1	153958625	-	NA
8088180	0.00669924	240	0.927836	-0.0594178	WNT5A	FALSE	chr3	55481393	-	NA
8145685	0.00674141	241	0.927836	-0.0655355	NA	FALSE	NA	NA	NA	NA
8164766	0.00676639	242	0.927836	0.0574909	AK8	FALSE	chr9	132878777	-	NA
8033736	0.00678195	243	0.927836	-0.076455	OR7G1	FALSE	chr19	9115763	-	NA
7905067	0.00681748	244	0.927836	-0.0843718	HIST1H4I	FALSE	chr6	27138587	+	NA
7894969	0.00682987	245	0.927836	-0.0925122	NA	FALSE	NA	NA	NA	NA
8071063	0.00688201	246	0.927836	0.194742	TPTEP1	FALSE	chr22	16619614	+	NA
8114193	0.00692345	247	0.927836	0.0565578	SAR1B	FALSE	chr5	134632774	-	NA
7894802	0.0069348	248	0.927836	-0.101846	NA	FALSE	NA	NA	NA	NA
7893215	0.0069385	249	0.927836	-0.176476	NA	FALSE	NA	NA	NA	NA
7947512	0.00707853	250	0.928546	-0.0651561	PAMR1	FALSE	chr11	35526031	-	NA
8117330	0.00707858	251	0.928546	-0.101602	HIST1H3A	FALSE	chr6	26020489	+	NA
7977879	0.00708033	252	0.928546	0.0563972	PSMB5	FALSE	chr14	23035230	-	NA
8000465	0.00709397	253	0.928546	-0.0944932	NA	FALSE	NA	NA	NA	NA
7896577	0.00709676	254	0.928546	0.213637	NA	FALSE	NA	NA	NA	NA
8077851	0.00712911	255	0.928546	-0.0651005	HRH1	FALSE	chr3	11252698	+	NA
8065392	0.00714897	256	0.928546	-0.0601426	NA	FALSE	NA	NA	NA	NA
7954008	0.00718149	257	0.928546	-0.0605932	NA	FALSE	NA	NA	NA	NA
7962199	0.00719479	258	0.928546	-0.0797871	NA	FALSE	NA	NA	NA	NA
7903893	0.00725131	259	0.932227	0.0321845	CD53	FALSE	chr1	110873153; 110873182; 110880236; 110894308; 110897669	+	NA
8074458	0.00737408	260	0.944364	-0.0480081	C22orf39	FALSE	chr22	19448232	-	NA
8090416	0.00745836	261	0.949327	-0.0698053	NA	FALSE	NA	NA	NA	NA
8118580	0.00746986	262	0.949327	-0.0379429	BRD2	FALSE	chr6	32970887	+	NA
7985159	0.00754536	263	0.949798	0.0502806	CRABP1	FALSE	chr15	78340323	+	NA
7994615	0.00755697	264	0.949798	-0.0585634	ZG16	FALSE	chr16	29778239	+	rs7204270
8161467	0.00755913	265	0.949798	-0.0511772	FAM74A4	FALSE	NA	NA	NA	NA
8058518	0.00763861	266	0.953309	-0.101082	NA	FALSE	NA	NA	NA	NA
7940451	0.00764791	267	0.953309	-0.0401542	DAK	FALSE	NA	NA	NA	NA
7919625	0.00767297	268	0.953309	-0.047775	HIST2H2BC	FALSE	NA	NA	NA	NA
8079628	0.00772522	269	0.956233	-0.0791081	RN7SL321P	FALSE	chr3	48379833	+	NA
7894798	0.00779198	270	0.959499	-0.0714701	NA	FALSE	NA	NA	NA	NA
8112196	0.00788427	271	0.959499	-0.05826	NA	FALSE	NA	NA	NA	NA
7937986	0.00789265	272	0.959499	0.0637177	OR52J3	FALSE	chr11	5046525	+	NA
7980454	0.00796963	273	0.959499	0.0617771	ALKBH1	FALSE	chr14	77708020	-	NA
7896210	0.00797179	274	0.959499	-0.0457745	NA	FALSE	NA	NA	NA	NA
8031825	0.00797538	275	0.959499	0.101783	ZNF587B	FALSE	chr19	57830294	+	NA
8164696	0.00797847	276	0.959499	-0.0593437	NA	FALSE	chr9	131782958	-	NA
8107934	0.00798214	277	0.959499	-0.0593403	C5orf56	FALSE	chr5	132410980; 132410988; 132419863; 132410980; 132410988; 132470531; 132410635	+	NA
7893018	0.00804501	278	0.962658	-0.12272	NA	FALSE	NA	NA	NA	NA
8092295	0.00815089	279	0.962658	-0.0640475	CCDC39	FALSE	chr3	180679500	-	NA
8078382	0.00815494	280	0.962658	0.0765101	NA	FALSE	NA	NA	NA	NA
7907370	0.00815749	281	0.962658	0.0958781	DNM3	FALSE	chr1	171841499	+	NA
8126729	0.00821056	282	0.962658	-0.0639897	CLIC5	FALSE	chr6	46080395	-	NA
8147503	0.00829955	283	0.962658	-0.0873051	LAPTM4B	FALSE	chr8	97775056	+	NA
7894366	0.00832421	284	0.962658	-0.0578694	NA	FALSE	NA	NA	NA	NA
8045604	0.00837821	285	0.962658	0.0559271	MBD5	FALSE	chr2	148021010	+	NA
7957793	0.00842904	286	0.962658	0.0643089	ACTR6	FALSE	chr12	100200086	+	NA
7927106	0.00843814	287	0.962658	-0.0994867	RNU6-1170P	FALSE	chr10	42605157	+	NA
7999279	0.00844997	288	0.962658	-0.0604044	NAGPA	FALSE	chr16	5033934	-	NA
7965871	0.00849822	289	0.962658	0.0814185	RN7SL793P	FALSE	chr12	102217613	-	NA
7982284	0.00854592	290	0.962658	-0.0726975	GOLGA8O	FALSE	chr15	32455634	-	NA
8136969	0.00856902	291	0.962658	-0.071629	OR2A25	FALSE	chr7	144074181	+	NA
7894675	0.00858022	292	0.962658	0.0685777	NA	FALSE	NA	NA	NA	NA
8030993	0.00861496	293	0.962658	0.0656358	ZNF761	FALSE	chr19	53431992; 53445000; 53445184; 53447236; 53449895	+	NA
8019804	0.00863093	294	0.962658	0.130694	ROCK1P1	FALSE	NA	NA	NA	NA
8169636	0.00864371	295	0.962658	-0.0725945	RN7SL118P	FALSE	NA	NA	NA	NA
8146482	0.00865933	296	0.962658	0.0469736	TGS1	FALSE	chr8	55773141	+	NA
7902789	0.00866394	297	0.962658	0.0494217	HS2ST1	FALSE	chr1	86914647	+	NA
7952004	0.00870558	298	0.962658	-0.0556969	SCN4B	FALSE	chr11	118152888	-	NA
7905854	0.00871084	299	0.962658	-0.0372201	ZBTB7B	FALSE	chr1	155002629	+	NA
8081343	0.00874123	300	0.962658	0.0610256	TRMT10C	FALSE	chr3	101561861	+	NA
7995739	0.00878783	301	0.962658	0.0677474	GNAO1	FALSE	chr16	56191389	+	NA
7976152	0.00890869	302	0.962658	-0.0853986	NA	FALSE	NA	NA	NA	NA
7979694	0.00895798	303	0.962658	-0.044673	YBX1P1	FALSE	NA	NA	NA	NA
8030789	0.00899175	304	0.962658	-0.058933	SIGLEC7	FALSE	chr19	51142300	+	NA
8122261	0.00907564	305	0.962658	0.0931357	NA	FALSE	NA	NA	NA	NA
8037144	0.00908	306	0.962658	-0.0392954	DEDD2	FALSE	chr19	42220123	-	NA
8004133	0.00909094	307	0.962658	0.0754016	RPAIN	FALSE	chr17	5419640	+	NA
8159541	0.00914858	308	0.962658	-0.0369869	C9orf142	FALSE	chr9	136992417	+	NA
8089314	0.00921717	309	0.962658	0.0838914	IFT57	FALSE	chr3	108222570	-	NA
7910676	0.00923877	310	0.962658	-0.0736215	NA	FALSE	NA	NA	NA	NA
8081032	0.0092772	311	0.962658	0.0672524	RN7SKP61	FALSE	chr3	78161697	+	NA
8170590	0.00930828	312	0.962658	0.0447684	NSDHL	FALSE	NA	NA	NA	NA
8092834	0.00931682	313	0.962658	-0.073543	RN7SL447P	FALSE	chr3	193740715	-	NA
8056408	0.00934213	314	0.962658	-0.0570314	GALNT3	FALSE	chr2	165794682	-	NA
8054477	0.00934529	315	0.962658	-0.0466033	RPL22P11	FALSE	NA	NA	NA	NA
7892579	0.00937778	316	0.962658	0.0633923	NA	FALSE	NA	NA	NA	NA
7943413	0.00939612	317	0.962658	0.108857	BIRC3	FALSE	chr11	102317449; 102317483; 102317494; 102317501; 102317562; 102325220; 102336520	+	NA
8046757	0.00939625	318	0.962658	0.0940519	RN7SL267P	FALSE	chr2	182314283	+	NA
7912520	0.00942933	319	0.962658	0.055048	NPPB	FALSE	chr1	11858931	-	NA
7941505	0.00948537	320	0.962658	0.0603554	CST6	FALSE	chr11	66011840	+	NA
7896049	0.00949737	321	0.962658	-0.108594	NA	FALSE	NA	NA	NA	NA
7895052	0.00970479	322	0.962658	-0.0513232	NA	FALSE	NA	NA	NA	NA
7893146	0.00973916	323	0.962658	0.173596	NA	FALSE	NA	NA	NA	NA
8141717	0.00974216	324	0.962658	-0.0425974	FIS1	FALSE	chr7	101245085	-	NA
7939581	0.00978823	325	0.962658	-0.0512661	LOC399886	FALSE	NA	NA	NA	NA
7919627	0.00980415	326	0.962658	-0.0843718	HIST1H4I	FALSE	chr6	27138587	+	NA
8167220	0.00990131	327	0.962658	0.0672549	SSX6	FALSE	NA	NA	NA	NA
7947881	0.00997209	328	0.962658	-0.0462491	RAPSN	FALSE	chr11	47449178	-	rs7120737
7988093	0.00997982	329	0.962658	0.0519781	TP53BP1	FALSE	chr15	43493127	-	NA
7894570	0.010053	330	0.962658	0.470121	NA	FALSE	NA	NA	NA	NA
8118804	0.0100744	331	0.962658	0.0570865	PACSIN1	FALSE	chr6	34514871	+	NA
7971197	0.0100966	332	0.962658	0.0324395	ELF1	FALSE	chr13	40982225	-	NA
7892652	0.0101092	333	0.962658	-0.0493266	NA	FALSE	NA	NA	NA	NA
8002969	0.0102002	334	0.962658	0.091636	MAF	FALSE	chr16	79600714	-	rs7196953
8043583	0.0102348	335	0.962658	0.0669462	STARD7-AS1	FALSE	chr2	96240238; 96208415; 96239712	+	NA
8127664	0.0102943	336	0.962658	-0.0690043	RNA5SP209	FALSE	chr6	75865335	-	NA
8088954	0.0103082	337	0.962658	-0.097022	NA	FALSE	NA	NA	NA	NA
8139746	0.010321	338	0.962658	-0.054489	PHKG1	FALSE	chr7	56092996	-	NA
7905523	0.0103891	339	0.962658	-0.0438198	LCE1D	FALSE	chr1	152796750	+	NA
8151217	0.0103919	340	0.962658	-0.0689193	NA	FALSE	NA	NA	NA	NA
8118293	0.0104037	341	0.962658	-0.050858	MSH5-SAPCD1	FALSE	chr6	31740019; 31759444; 31760719; 31762443	+	NA
7953594	0.0104039	342	0.962658	0.0595906	EMG1	FALSE	chr12	6970892	+	NA
7895879	0.0104125	343	0.962658	-0.0620801	NA	FALSE	NA	NA	NA	NA
8016898	0.0104302	344	0.962658	0.0313682	SRSF1	FALSE	chr17	58007261	-	NA
8102328	0.0104409	345	0.962658	0.0639328	CFI	FALSE	chr4	109802179	-	NA
8176098	0.0104531	346	0.962658	-0.0508262	UBL4A	FALSE	NA	NA	NA	NA
8050805	0.0104767	347	0.962658	-0.068846	POMC	FALSE	chr2	25168604	-	rs4665719
8157679	0.0104819	348	0.962658	-0.0847707	OR1Q1	FALSE	chr9	122614737	+	NA
7896156	0.0105098	349	0.962658	-0.0620043	NA	FALSE	NA	NA	NA	NA
8175436	0.0105471	350	0.962658	0.0594769	RAC1P4	FALSE	NA	NA	NA	NA
8044127	0.0105635	351	0.962658	0.0594639	C2orf49	FALSE	chr2	105337531	+	NA
7893192	0.0105649	352	0.962658	-0.176657	NA	FALSE	NA	NA	NA	NA
8035666	0.0106355	353	0.962658	0.0389667	SUGP1	FALSE	chr19	19320844	-	NA
7975989	0.0106583	354	0.962658	0.0456653	SLIRP	FALSE	chr14	77708078	+	NA
7928671	0.0106897	355	0.962658	0.0760154	TMEM254	FALSE	chr10	80081702; 80078645; 80078691; 80079327; 80078645; 80081722; 80078681; 80079272; 80079294; 80078645; 80078669; 80079035; 80079269	+	NA
7896093	0.0107084	356	0.962658	-0.176363	NA	FALSE	NA	NA	NA	NA
8112672	0.0107791	357	0.962658	0.0664613	ANKRD31	FALSE	chr5	75236878	-	NA
8041642	0.0108699	358	0.962658	-0.176036	RNU6-958P	FALSE	chr2	43408306	+	rs12466022; rs2163226; rs6718520
7904016	0.0108777	359	0.962658	-0.0570334	NA	FALSE	NA	NA	NA	NA
7969772	0.0108896	360	0.962658	-0.0559005	NA	FALSE	NA	NA	NA	NA
7897329	0.0109025	361	0.962658	0.0712753	THAP3	FALSE	chr1	6625180	+	rs3007421
7934365	0.0109028	362	0.962658	-0.0757386	NA	FALSE	NA	NA	NA	NA
8083839	0.0109109	363	0.962658	-0.0968324	GPR160	FALSE	chr3	170037928	+	NA
8079151	0.0109134	364	0.962658	-0.0704526	NA	FALSE	NA	NA	NA	NA
7956908	0.010949	365	0.962658	0.133941	HELB	FALSE	chr12	66302544	+	NA
8046530	0.0109889	366	0.962658	0.0591345	HOXD11	FALSE	chr2	176107285	+	NA
7938301	0.0110052	367	0.962658	-0.0558219	AKIP1	FALSE	chr11	8911138	+	NA
8167728	0.0110082	368	0.962658	-0.0383119	SSX2B	FALSE	NA	NA	NA	NA
7912863	0.0110413	369	0.962658	-0.0353228	MST1L	FALSE	NA	NA	NA	NA
8098163	0.011044	370	0.962658	-0.096159	RNU6-668P	FALSE	chr4	164787289	+	NA
8057677	0.0110565	371	0.962658	-0.0830661	SLC40A1	FALSE	chr2	189580887	-	NA
8077450	0.011111	372	0.962658	0.037398	ARL8B	FALSE	chr3	5122244	+	NA
7940177	0.0111801	373	0.962658	0.0861635	OR4D10	FALSE	chr11	59477372	+	NA
7941059	0.0112306	374	0.962658	-0.0556706	LOC100996455	FALSE	NA	NA	NA	NA
7977373	0.0112524	375	0.962658	-0.0417895	MTA1	TRUE	chr14	105419891	+	NA
7893871	0.0112758	376	0.962658	0.106705	NA	FALSE	NA	NA	NA	NA
8128075	0.0113037	377	0.962658	-0.0958665	NA	FALSE	NA	NA	NA	NA
7892929	0.0113177	378	0.962658	-0.134985	NA	FALSE	NA	NA	NA	NA
7939365	0.0113487	379	0.962658	-0.0454597	FJX1	FALSE	chr11	35618418	+	NA
8074212	0.011383	380	0.962658	0.0475641	GAB4	FALSE	chr22	17008222	-	NA
7894538	0.011423	381	0.962658	-0.166328	NA	FALSE	NA	NA	NA	NA
8081202	0.0115064	382	0.962658	0.0924321	OR5H6	FALSE	chr3	98264284	+	NA
7955074	0.0115086	383	0.962658	-0.067994	RNU6-1203P	FALSE	chr12	48081318	+	NA
7894305	0.0115281	384	0.962658	-0.0612455	NA	FALSE	NA	NA	NA	NA
8133961	0.011541	385	0.962658	-0.0617536	RUNDC3B	FALSE	chr7	87628614	+	NA
7896255	0.0115431	386	0.962658	-0.124345	NA	FALSE	NA	NA	NA	NA
7895293	0.0115477	387	0.962658	-0.144785	NA	FALSE	NA	NA	NA	NA
8105607	0.0115881	388	0.962658	0.0679112	FAM159B	FALSE	chr5	64690307	+	NA
8080100	0.0115975	389	0.962658	0.0434257	RAD54L2	FALSE	chr3	51541579	+	NA
7981385	0.0116163	390	0.962658	-0.0836323	NA	FALSE	NA	NA	NA	NA
7917103	0.0116174	391	0.962658	0.0434151	ZZZ3	FALSE	chr1	77682658	-	NA
8074223	0.0116309	392	0.962658	0.0751038	CECR6	FALSE	chr22	17121253	-	NA
7893565	0.0116483	393	0.962658	-0.134484	NA	FALSE	NA	NA	NA	NA
8060839	0.0116665	394	0.962658	0.0651294	CRLS1	FALSE	chr20	6007251	+	NA
8139915	0.0116887	395	0.962658	-0.0698106	NA	FALSE	NA	NA	NA	NA
8102214	0.0117051	396	0.962658	0.0727765	PAPSS1	FALSE	chr4	107720452	-	NA
8096296	0.0117312	397	0.962658	-0.067819	HSP90AB3P	FALSE	NA	NA	NA	NA
8159919	0.0117779	398	0.962658	-0.0535352	SPATA6L	FALSE	chr9	4666307; 4666347; 4666399; 4666423; 4666423; 4666428; 4666428; 4666436; 4666449; 4666464; 4666508; 4666666; 4666674	-	NA
8015642	0.0117788	399	0.962658	0.0585521	PSMC3IP	FALSE	chr17	42577697	-	rs2293152; rs4796791; rs744166; rs9891119
8121485	0.0117974	400	0.962658	-0.095842	NA	FALSE	chr6	110848545	+	NA
8125903	0.0118014	401	0.962658	-0.055299	TULP1	FALSE	chr6	35512938	-	NA
8096938	0.0118267	402	0.962658	0.0473055	LARP7	FALSE	chr4	112637125	+	NA
7987648	0.0118749	403	0.962658	-0.0636011	RNU6-1169P	FALSE	chr15	41448844	-	NA
7921121	0.0118923	404	0.962658	0.0525794	MRPL24	FALSE	chr1	156738227; 156741088; 156741131; 156741590; 156741088; 156740562	-	NA
8100127	0.0118988	405	0.962658	-0.0696432	COX7B2	FALSE	chr4	46909231	-	NA
8080001	0.0119058	406	0.962658	-0.0430223	HEMK1	FALSE	chr3	50569196	+	NA
8173086	0.0120017	407	0.962658	-0.0551724	FGD1	FALSE	NA	NA	NA	NA
8143518	0.0120136	408	0.962658	0.0583857	TRPV5	FALSE	chr7	142933723	-	NA
7926366	0.0120644	409	0.962658	-0.0954126	RNU2-18P	FALSE	chr10	16476002	+	NA
8109620	0.012072	410	0.962658	0.0431775	TTC1	TRUE	chr5	160038914; 160043132; 160009112; 160036505; 160009112	+	NA
7892914	0.0120722	411	0.962658	0.159476	NA	FALSE	NA	NA	NA	NA
8107554	0.0120724	412	0.962658	-0.0576546	FAM170A	FALSE	chr5	119629558	+	NA
7910164	0.0121398	413	0.962658	-0.0498122	ADCK3	FALSE	chr1	226940287	+	NA
7911444	0.0121962	414	0.962658	0.0361033	UBE2J2	FALSE	chr1	1273885	-	NA
8091283	0.0121964	415	0.962658	0.0764108	PLOD2	FALSE	chr3	146161167	-	NA
8176665	0.0121989	416	0.962658	-0.0819836	NA	FALSE	NA	NA	NA	NA
8177193	0.0121989	417	0.962658	-0.0819836	NA	FALSE	NA	NA	NA	NA
7914354	0.0121989	418	0.962658	-0.0413307	PEF1	FALSE	chr1	31644887	-	NA
7895683	0.0122334	419	0.962658	-0.164879	NA	FALSE	NA	NA	NA	NA
8153790	0.012264	420	0.962658	0.04522	TONSL	FALSE	chr8	144444444	-	NA
8092523	0.0122976	421	0.962658	-0.074528	EHHADH	FALSE	chr3	185254048	-	NA
7892595	0.012312	422	0.962658	-0.164743	NA	FALSE	NA	NA	NA	NA
8068363	0.0123286	423	0.962658	-0.0673635	LINC00310	FALSE	chr21	34180676	+	NA
8119184	0.0123828	424	0.962658	0.0522732	RNF8	FALSE	chr6	37353971	+	NA
7983335	0.0123893	425	0.962658	0.0368232	CTDSPL2	FALSE	chr15	44427233	+	NA
7973393	0.0124569	426	0.962658	-0.0502732	IL25	FALSE	chr14	23372860	+	NA
7983527	0.0124621	427	0.962658	-0.0548881	SEMA6D	FALSE	chr15	47184100	+	NA
8056041	0.0124958	428	0.962658	0.0644834	NA	FALSE	NA	NA	NA	NA
7896571	0.0125256	429	0.962658	-0.19589	NA	FALSE	NA	NA	NA	NA
7893626	0.0125426	430	0.962658	-0.172876	NA	FALSE	NA	NA	NA	NA
7953723	0.0125455	431	0.962658	0.052174	CLEC4A	FALSE	chr12	8123631	+	NA
7971163	0.0125478	432	0.962658	-0.082768	RNY4P14	FALSE	chr13	39785510	-	NA
8047778	0.0126189	433	0.962658	-0.110111	SNORD51	FALSE	chr2	206161877	+	NA
7909931	0.0126429	434	0.962658	0.0314299	BROX	FALSE	chr1	222712552	+	NA
8080926	0.0126941	435	0.962658	0.0358954	ARL6IP5	FALSE	chr3	69084943	+	NA
8030871	0.0127419	436	0.962658	0.0608129	ZNF613	FALSE	chr19	51927219	+	NA
8065198	0.0127729	437	0.962658	0.0578669	RNU2-56P	FALSE	chr20	18265879	-	NA
8093035	0.0127762	438	0.962658	-0.057207	NA	FALSE	NA	NA	NA	NA
8101467	0.0128071	439	0.962658	0.0590774	HELQ	FALSE	chr4	83455856	-	NA
8089652	0.0128085	440	0.962658	0.0389856	NAA50	FALSE	chr3	113746274	-	NA
7896327	0.0128136	441	0.962658	-0.163891	NA	FALSE	NA	NA	NA	NA
8126360	0.0128152	442	0.962658	0.0520121	MED20	FALSE	chr6	41921099	-	NA
8038139	0.012818	443	0.962658	-0.0557754	NTN5	FALSE	chr19	48673007	-	NA
7983989	0.0128677	444	0.962658	-0.0813903	NA	FALSE	NA	NA	NA	NA
8102513	0.0128695	445	0.962658	-0.0669675	LOC101929762	FALSE	NA	NA	NA	NA
7892852	0.0129119	446	0.962658	-0.109771	NA	FALSE	NA	NA	NA	NA
7974902	0.0129375	447	0.962658	-0.0546042	RHOJ	FALSE	chr14	63204407	+	NA
8177083	0.0129591	448	0.962658	-0.0941283	NA	FALSE	NA	NA	NA	NA
8157976	0.0129812	449	0.962658	0.064123	GARNL3	FALSE	chr9	127264512; 127225238; 127224470; 127224625; 127225354; 127264235; 127224538; 127245336; 127263661; 127224264; 127313352; 127265001; 127353517; 127342314; 127355307; 127387129; 127388411; 127361715; 127264922; 127355355; 127263661; 127264525	+	NA
7910897	0.0130525	450	0.96364	-0.0602131	RN7SKP195	FALSE	chr1	237120806	+	NA
8103906	0.0130638	451	0.96364	0.0576753	LOC728175	FALSE	NA	NA	NA	NA
8053718	0.0130812	452	0.96364	-0.0940079	IGKV2D-40	FALSE	chr2	89851790	+	NA
8073032	0.0131419	453	0.964468	0.0465871	TOMM22	FALSE	chr22	38681947	+	NA
8056710	0.0131504	454	0.964468	-0.0667675	CCDC173	FALSE	chr2	169694433	-	NA
7966098	0.0132276	455	0.967239	0.0447241	SART3	FALSE	chr12	108561389	-	NA
8180078	0.0132463	456	0.967239	-0.0544246	HLA-DMB	FALSE	chr6	32941070	-	NA
7896245	0.0133224	457	0.969618	-0.132122	NA	FALSE	NA	NA	NA	NA
8023591	0.0133371	458	0.969618	0.0638662	SDCCAG3P1	FALSE	NA	NA	NA	NA
8104729	0.013415	459	0.972581	0.0603517	NA	FALSE	NA	NA	NA	NA
8015349	0.0134363	460	0.972581	0.0516506	KRT19	FALSE	chr17	41528308	-	NA
8014882	0.0135195	461	0.973005	-0.0372377	MIEN1	FALSE	chr17	39730787	-	rs12946510
7896095	0.0135296	462	0.973005	-0.109077	NA	FALSE	NA	NA	NA	NA
7988424	0.0135557	463	0.973005	-0.141769	RNU7-4P	FALSE	chr12	68911920	+	NA
7977409	0.0135705	464	0.973005	-0.0603926	CRIP1	FALSE	chr14	105486916	+	NA
8055482	0.0135882	465	0.973005	-0.0603815	RN7SKP286	FALSE	chr2	138863895	-	NA
7935401	0.0136208	466	0.973241	-0.06836	ARHGAP19-SLIT1	FALSE	chr10	97155433; 97292637	-	NA
7893452	0.0136807	467	0.97543	-0.236973	NA	FALSE	NA	NA	NA	NA
7926539	0.0137359	468	0.977275	-0.0663624	NA	FALSE	NA	NA	NA	NA
7895555	0.013767	469	0.977401	-0.162349	NA	FALSE	NA	NA	NA	NA
8155388	0.0138403	470	0.979307	-0.0540892	FAM74A4	FALSE	NA	NA	NA	NA
8027448	0.0139496	471	0.979307	-0.0643279	DPY19L3	FALSE	chr19	32405748	+	NA
8117594	0.0139736	472	0.979307	-0.0931565	HIST1H2BM	FALSE	chr6	27815043	+	NA
8088425	0.0139785	473	0.979307	-0.0441258	FAM3D	FALSE	chr3	58666848	-	NA
8005328	0.0139884	474	0.979307	-0.0300376	MYO15A	FALSE	chr17	18108705	+	NA
8122744	0.0140278	475	0.979307	-0.0564617	IYD	FALSE	chr6	150368891	+	NA
8156356	0.0140549	476	0.979307	-0.0564463	NA	FALSE	NA	NA	NA	NA
8052376	0.0142489	477	0.979307	0.0611057	LOC100129434	FALSE	NA	NA	NA	NA
7954492	0.0142724	478	0.979307	0.0460191	FGFR1OP2	FALSE	chr12	26938499	+	NA
7894807	0.0142726	479	0.979307	-0.145958	NA	FALSE	NA	NA	NA	NA
8169519	0.0143237	480	0.979307	0.0460331	WDR44	FALSE	NA	NA	NA	NA
8045931	0.0143551	481	0.979307	-0.069398	RN7SL423P	FALSE	chr2	160877546	+	NA
8045287	0.0145278	482	0.979307	-0.10801	NA	FALSE	NA	NA	NA	NA
8058512	0.0145482	483	0.979307	-0.0537056	PLEKHM3	FALSE	chr2	208025560	-	NA
8147785	0.0145743	484	0.979307	0.051025	DCAF13	FALSE	chr8	103414713	+	NA
7919886	0.0146144	485	0.979307	-0.0676829	RNU6-884P	FALSE	chr1	151022852	-	NA
8031622	0.0146243	486	0.979307	-0.0561269	GALP	FALSE	chr19	56176019	+	NA
8108401	0.0146333	487	0.979307	-0.0592485	RNU6-572P	FALSE	chr5	139221757	+	NA
7930760	0.0146968	488	0.979307	0.0635046	PNLIPRP3	FALSE	chr10	116427866	+	NA
7911136	0.0147194	489	0.979307	-0.13034	NA	FALSE	NA	NA	NA	NA
8131705	0.0147253	490	0.979307	-0.0666359	RPL23P8	FALSE	NA	NA	NA	NA
8055890	0.0148115	491	0.979307	0.0457621	STAM2	FALSE	chr2	152175992	-	NA
7894207	0.0148665	492	0.979307	-0.0535385	NA	FALSE	NA	NA	NA	NA
7935146	0.0149482	493	0.979307	0.0712286	NOC3L	FALSE	chr10	94362939	-	NA
7938154	0.014969	494	0.979307	-0.0345704	ILK	TRUE	chr11	6603815	+	NA
7952036	0.0150168	495	0.979307	0.0606192	MPZL3	FALSE	chr11	118252347	-	rs533646
8037387	0.0150419	496	0.979307	-0.139776	RN7SL368P	FALSE	chr19	43660776	-	NA
8089029	0.0150611	497	0.979307	0.0627029	DHFRL1	FALSE	chr3	94063223	-	NA
8055688	0.0150738	498	0.979307	-0.0571232	RND3	FALSE	chr2	150487667	-	NA
7965508	0.0150874	499	0.979307	-0.119936	NA	FALSE	NA	NA	NA	NA
7942544	0.0151069	500	0.979307	0.0357586	RNF169	FALSE	chr11	74748867	+	NA
7894752	0.0151194	501	0.979307	-0.1199	NA	FALSE	NA	NA	NA	NA
8156098	0.0151585	502	0.979307	-0.0419806	SPATA31D4	FALSE	chr9	81928513	+	NA
7963786	0.0152137	503	0.979307	-0.0366084	ITGA5	FALSE	chr12	54419460	-	NA
8095430	0.0152362	504	0.979307	-0.0794855	HTN3	FALSE	chr4	70028412	+	NA
7914000	0.0152865	505	0.979307	-0.0533225	NR0B2	FALSE	chr1	26913966	-	NA
7902345	0.0152866	506	0.979307	0.058017	TYW3	FALSE	chr1	74733151	+	NA
8022557	0.0152981	507	0.979307	-0.129645	NA	FALSE	NA	NA	NA	NA
8114263	0.0153171	508	0.979307	0.0699069	LECT2	FALSE	chr5	135955034	-	NA
8078214	0.0154142	509	0.979307	0.0379237	RAB5A	FALSE	chr3	19947404	+	NA
8067709	0.0154292	510	0.979307	-0.0399705	GMEB2	FALSE	chr20	63627041	-	rs2256814; rs6062314
7949206	0.0154352	511	0.979307	-0.0365307	MEN1	FALSE	chr11	64810716	-	rs694739
8126446	0.0154667	512	0.979307	0.0562244	C6orf226	FALSE	chr6	42890816	-	NA
8105908	0.0155622	513	0.979307	0.604286	OCLN	FALSE	chr5	69492789	+	NA
7896304	0.0155639	514	0.979307	-0.159676	NA	FALSE	NA	NA	NA	NA
8148446	0.015608	515	0.979307	-0.0591949	NA	FALSE	NA	NA	NA	NA
8180319	0.015643	516	0.979307	0.074542	NA	FALSE	NA	NA	NA	NA
7936320	0.0156607	517	0.979307	-0.0555724	RPL13AP6	FALSE	NA	NA	NA	NA
8104611	0.0157607	518	0.979307	-0.0586148	RN7SKP133	FALSE	chr5	17345615	+	NA
7896704	0.015848	519	0.979307	-0.091512	NA	FALSE	NA	NA	NA	NA
7893847	0.0158574	520	0.979307	-0.128994	NA	FALSE	NA	NA	NA	NA
8180377	0.0159254	521	0.979307	0.160995	NA	FALSE	NA	NA	NA	NA
8013965	0.0159729	522	0.979307	0.0503133	SSH2	FALSE	chr17	29930093	-	NA
8088718	0.0160021	523	0.979307	0.030345	UBA3	FALSE	chr3	69080408	-	NA
8100977	0.0160119	524	0.979307	0.0559234	CXCL5	FALSE	chr4	73998779	-	NA
8074541	0.0160206	525	0.979307	-0.0342258	TRMT2A	FALSE	chr22	20117245	-	NA
8136576	0.0161152	526	0.979307	-0.0630045	RNU1-58P	FALSE	chr7	140241869	+	NA
8062908	0.0161314	527	0.979307	-0.0294159	STK4	FALSE	chr20	44966473	+	NA
8005829	0.0161768	528	0.979307	-0.10638	NA	FALSE	NA	NA	NA	NA
7896119	0.0162293	529	0.979307	-0.138301	NA	FALSE	NA	NA	NA	NA
7973702	0.0162748	530	0.979307	-0.0511331	LTB4R	FALSE	chr14	24313310	+	NA
8156196	0.0163395	531	0.979307	-0.0477422	C9orf170	FALSE	chr9	87148643	+	NA
8058542	0.0163632	532	0.979307	-0.0552145	C2orf80	FALSE	chr2	208190073	-	NA
8098177	0.0163685	533	0.979307	0.0584383	KLHL2	FALSE	chr4	165209892	+	NA
8002216	0.0163754	534	0.979307	0.0557276	NA	FALSE	NA	NA	NA	NA
8035351	0.0164107	535	0.979307	0.07736	JAK3	FALSE	chr19	17848032	-	rs11554159; rs874628
8091523	0.0164842	536	0.979307	0.0500668	P2RY13	FALSE	chr3	151329548	-	NA
7894193	0.0165015	537	0.979307	0.151819	NA	FALSE	NA	NA	NA	NA
8020419	0.0165329	538	0.979307	-0.0714722	MIR320C1	FALSE	chr18	21683509	+	NA
8155451	0.0165449	539	0.979307	-0.0627605	CNN2P4	FALSE	NA	NA	NA	NA
8161556	0.0165449	540	0.979307	-0.0627605	CNN2P4	FALSE	NA	NA	NA	NA
7895055	0.0165629	541	0.979307	0.0449812	NA	FALSE	NA	NA	NA	NA
8166576	0.0166677	542	0.979307	0.0689879	MAGEB5	FALSE	NA	NA	NA	NA
7943984	0.0166999	543	0.979307	0.170662	ZBTB16	FALSE	chr11	114060506	+	NA
7970674	0.0167322	544	0.979307	-0.0550318	RNY1P3	FALSE	chr13	25950821	-	NA
7971661	0.0167575	545	0.979307	0.0921903	MIR15A	FALSE	chr13	50049202	-	NA
8160084	0.0167685	546	0.979307	0.068922	RNU2-47P	FALSE	chr9	12300451	-	NA
8175835	0.016814	547	0.979307	0.0351738	BCAP31	TRUE	NA	NA	NA	NA
7972365	0.0168162	548	0.979307	-0.111402	NA	FALSE	NA	NA	NA	NA
8076327	0.0168407	549	0.979307	0.0621743	LOC100129648	FALSE	NA	NA	NA	NA
7986757	0.0168845	550	0.979307	0.0997152	NDN	FALSE	chr15	23687330	-	NA
7983173	0.0169452	551	0.979307	-0.0428978	CCNDBP1	FALSE	chr15	43185256	+	NA
7894619	0.0169993	552	0.979307	0.133682	NA	FALSE	NA	NA	NA	NA
7894246	0.0170062	553	0.979307	-0.0782235	NA	FALSE	NA	NA	NA	NA
7988348	0.0170172	554	0.979307	0.0870718	NA	FALSE	NA	NA	NA	NA
7893629	0.017037	555	0.979307	-0.188054	NA	FALSE	NA	NA	NA	NA
8148474	0.0170544	556	0.979307	-0.0624782	RNA5SP278	FALSE	chr8	140940561	+	NA
7895046	0.0170871	557	0.979307	-0.0624603	NA	FALSE	NA	NA	NA	NA
8046186	0.0171042	558	0.979307	-0.052444	PHOSPHO2	FALSE	chr2	169694464	+	NA
7892855	0.017132	559	0.979307	0.165902	NA	FALSE	NA	NA	NA	NA
8084951	0.0171404	560	0.979307	0.055328	NRROS	FALSE	chr3	196639685	+	NA
8050423	0.0171699	561	0.979307	0.124942	MYCNOS	FALSE	chr2	15941723	-	NA
7938100	0.0171787	562	0.979307	-0.0473856	SMPD1	FALSE	chr11	6390430	+	NA
7896365	0.0172499	563	0.979307	-0.105395	NA	FALSE	NA	NA	NA	NA
7930919	0.0172541	564	0.979307	-0.0506884	NA	FALSE	NA	NA	NA	NA
7894929	0.0172554	565	0.979307	-0.165595	NA	FALSE	NA	NA	NA	NA
7894040	0.0172554	566	0.979307	-0.165595	NA	FALSE	NA	NA	NA	NA
7964832	0.0172941	567	0.979307	-0.067541	NA	FALSE	NA	NA	NA	NA
7893559	0.0172951	568	0.979307	0.0291212	NA	FALSE	NA	NA	NA	NA
8069880	0.0173185	569	0.979307	0.0993067	TIAM1	FALSE	chr21	31558977	-	NA
8109141	0.0174385	570	0.979307	0.0446556	GRPEL2	FALSE	chr5	149345429	+	NA
7964466	0.0175172	571	0.979307	-0.0337679	DCTN2	FALSE	chr12	57547172	-	rs12368653; rs201202118; rs703842
8164535	0.0175231	572	0.979307	-0.0406872	CRAT	FALSE	chr9	129098036; 129098371; 129109276; 129110672; 129110711; 129110769; 129110782; 129110804; 129111189	-	NA
7896499	0.0175492	573	0.979307	0.124495	NA	FALSE	NA	NA	NA	NA
8027819	0.0175552	574	0.979307	-0.0472305	HAMP	FALSE	chr19	35282345	+	NA
7942912	0.017594	575	0.979307	-0.12709	RNU6-560P	FALSE	chr11	86153226	+	NA
8007990	0.0175943	576	0.979307	-0.12709	NA	FALSE	NA	NA	NA	NA
7968732	0.017626	577	0.979307	-0.0905899	RNY3P9	FALSE	chr13	40226826	+	NA
8110546	0.0176286	578	0.979307	0.0298907	MAML1	FALSE	chr5	179732849	+	NA
8121159	0.0176304	579	0.979307	-0.0778055	RN7SL797P	FALSE	chr6	96282566	+	NA
8149067	0.0177199	580	0.979307	-0.0777466	RN7SL318P	FALSE	chr8	5142707	-	NA
8044766	0.0177369	581	0.979307	0.0611131	INSIG2	FALSE	chr2	118088473	+	NA
8098103	0.0177416	582	0.979307	0.056676	FNIP2	FALSE	chr4	158769137	+	NA
7930882	0.0177456	583	0.979307	0.0494865	FAM45A	FALSE	chr10	119104116	+	NA
8082974	0.0177495	584	0.979307	0.055021	ESYT3	FALSE	chr3	138434612	+	NA
7946569	0.0177849	585	0.979307	-0.0580572	RNF141	FALSE	chr11	10541217	-	NA
7964927	0.0179411	586	0.979307	-0.0638283	TSPAN8	FALSE	chr12	71158099	-	NA
8154012	0.0179652	587	0.979307	0.0719904	KANK1	FALSE	chr9	470290	+	NA
8122182	0.0180163	588	0.979307	0.0406376	TBPL1	FALSE	chr6	133952169	+	NA
8034578	0.0180295	589	0.979307	-0.0476443	KLF1	FALSE	chr19	12887181	-	NA
7961187	0.018053	590	0.979307	-0.0775297	KLRC1	FALSE	chr12	10453348	-	NA
8094550	0.0180717	591	0.979307	-0.067903	C4orf19	FALSE	chr4	37453940	+	NA
8117922	0.0180745	592	0.979307	0.0444014	PRR3	FALSE	chr6	30557279	+	NA
7927548	0.0181022	593	0.979307	0.076152	TIMM23	FALSE	chr10	45972448	+	NA
8117106	0.0181342	594	0.979307	0.0901612	RNF144B	FALSE	chr6	18387349	+	NA
7893039	0.018162	595	0.979307	0.049969	NA	FALSE	NA	NA	NA	NA
8020825	0.0181703	596	0.979307	-0.104591	NA	FALSE	NA	NA	NA	NA
8139015	0.0183774	597	0.979307	0.0492095	NA	FALSE	NA	NA	NA	NA
7986565	0.0184371	598	0.979307	0.0491838	NA	FALSE	NA	NA	NA	NA
8016336	0.0184663	599	0.979307	-0.0389026	OSBPL7	FALSE	chr17	47821770	-	rs4239162; rs4794058
8048319	0.0184987	600	0.979307	-0.0518235	VIL1	FALSE	chr2	218419091	+	NA
7984736	0.0185039	601	0.979307	0.057411	REC114	FALSE	chr15	73443157	+	NA
8163348	0.0185107	602	0.979307	-0.0572202	C9orf84	FALSE	chr9	111759533	-	NA
7964145	0.0186394	603	0.979307	0.0527374	TIMELESS	FALSE	chr12	56449399	-	NA
7982269	0.0186898	604	0.979307	-0.12597	NA	FALSE	NA	NA	NA	NA
7987025	0.0186898	605	0.979307	-0.12597	NA	FALSE	NA	NA	NA	NA
7894351	0.0186919	606	0.979307	-0.135517	NA	FALSE	NA	NA	NA	NA
8052753	0.0186932	607	0.979307	0.0715262	GKN2	FALSE	chr2	68952970	-	NA
8051119	0.0187015	608	0.979307	0.0345854	PPM1G	FALSE	chr2	27409687	-	NA
7896092	0.0187157	609	0.979307	-0.078147	NA	FALSE	NA	NA	NA	NA
7893456	0.0187239	610	0.979307	0.195707	NA	FALSE	NA	NA	NA	NA
8016733	0.0187276	611	0.979307	0.054547	NA	FALSE	NA	NA	NA	NA
8001327	0.0187374	612	0.979307	-0.0552987	RNU6-257P	FALSE	chr16	48731801	-	NA
7893530	0.0187676	613	0.979307	0.044096	NA	FALSE	NA	NA	NA	NA
8017688	0.0187814	614	0.979307	-0.0675063	LRRC37A2	FALSE	chr17	46512709	+	NA
8103485	0.0188191	615	0.979307	0.0571495	NAF1	FALSE	chr4	163166890	-	NA
8007949	0.0188626	616	0.979307	-0.145118	EFCAB13	FALSE	chr17	47324024	+	rs4239162; rs4794058
8075963	0.0188741	617	0.979307	-0.0531308	LOC101927051	FALSE	NA	NA	NA	NA
8151679	0.0189022	618	0.979307	-0.0466982	DCAF4L2	FALSE	chr8	87874068	-	NA
7893150	0.018975	619	0.979307	-0.135217	NA	FALSE	NA	NA	NA	NA
8032380	0.018998	620	0.979307	-0.0387316	BTBD2	TRUE	chr19	2015724	-	NA
8070389	0.0190054	621	0.979307	0.0544163	HMGN1	FALSE	chr21	39349200	-	NA
7896618	0.0191067	622	0.979307	-0.135079	NA	FALSE	NA	NA	NA	NA
7945125	0.019122	623	0.979307	-0.0492953	KIRREL3-AS3	FALSE	chr11	127002909	+	NA
7914994	0.0191232	624	0.979307	-0.0827577	NA	FALSE	NA	NA	NA	NA
7922121	0.0191558	625	0.979307	0.115782	ANKRD36BP1	FALSE	NA	NA	NA	NA
8010313	0.0192691	626	0.979307	-0.0514978	ENPP7	FALSE	chr17	79730918	+	NA
7975626	0.0192963	627	0.979307	0.0653222	NA	FALSE	NA	NA	NA	NA
8090577	0.0193338	628	0.979307	0.0438836	MBD4	FALSE	chr3	129440029	-	NA
7985224	0.019352	629	0.979307	0.0843037	TBC1D2B	FALSE	chr15	78077724	-	NA
7993083	0.0193724	630	0.979307	-0.0471188	RBFOX1	FALSE	chr16	6019130	+	NA
8129108	0.0194017	631	0.979307	0.0652635	ZUFSP	FALSE	chr6	116668794	-	NA
7961962	0.019453	632	0.979307	-0.0825417	NA	FALSE	NA	NA	NA	NA
8109732	0.0194961	633	0.979307	0.0401229	MAT2B	FALSE	chr5	163505547	+	NA
8118259	0.0195047	634	0.979307	-0.0464707	MSH5	FALSE	chr6	31739947	+	NA
8091733	0.0195118	635	0.979307	-0.0887322	RNU2-31P	FALSE	chr3	159808570	-	rs1014486; rs2243123; rs4680534
8151219	0.0196096	636	0.979307	-0.0699034	NA	FALSE	NA	NA	NA	NA
7954465	0.0196103	637	0.979307	-0.0765593	NA	FALSE	NA	NA	NA	NA
7920100	0.0196629	638	0.979307	-0.0566888	THEM5	FALSE	chr1	151853697	-	NA
8126259	0.0197169	639	0.979307	-0.0419435	OARD1	FALSE	chr6	41072538	-	NA
7985016	0.0197559	640	0.979307	-0.0566472	SNX33	FALSE	chr15	75647905	+	NA
7998466	0.0197737	641	0.979307	-0.0351768	UNKL	FALSE	chr16	1414751	-	rs2744148
7918533	0.0197882	642	0.979307	0.0897109	ADORA3	FALSE	chr1	111503760	-	NA
7895450	0.0198018	643	0.979307	-0.134363	NA	FALSE	NA	NA	NA	NA
7895638	0.0198356	644	0.979307	-0.115258	NA	FALSE	NA	NA	NA	NA
8045283	0.0198434	645	0.979307	-0.0661402	NA	FALSE	NA	NA	NA	NA
7896420	0.019911	646	0.979307	-0.0884572	NA	FALSE	NA	NA	NA	NA
8019754	0.0199112	647	0.979307	0.036418	FAM195B	FALSE	chr17	81826394; 81833268; 81826662; 81833268; 81833291; 81833302; 81826194; 81824546; 81823820; 81824487; 81833242; 81833256	-	NA
7960919	0.0199131	648	0.979307	-0.0763784	MFAP5	FALSE	chr12	8662812	-	NA
8105481	0.0199595	649	0.979307	0.0555989	GAPT	FALSE	chr5	58491434	+	NA
8148265	0.0199744	650	0.979307	0.0468247	RNF139	FALSE	chr8	124474737	+	NA
8124521	0.0199965	651	0.979307	0.142473	HIST1H4K	FALSE	chr6	27831527	-	NA
8162931	0.0200142	652	0.979307	-0.0636496	OR13C3	FALSE	chr9	104536856	-	NA
8109802	0.0200705	653	0.979307	0.0414924	RARS	FALSE	chr5	168486444	+	NA
7904000	0.0200915	654	0.979307	0.0598812	DDX20	FALSE	chr1	111755304	+	NA
7935968	0.0201247	655	0.979307	0.0288025	LDB1	FALSE	chr10	102120453	-	NA
7892995	0.0201685	656	0.979307	0.193183	NA	FALSE	NA	NA	NA	NA
8007169	0.0201749	657	0.979307	-0.0564613	KLHL10	FALSE	chr17	41837779	+	rs2293152
8033789	0.0201976	658	0.979307	0.0484559	ZNF121	FALSE	chr19	9584533	-	NA
7974166	0.0202178	659	0.979307	0.0668548	FANCM	FALSE	chr14	45135946	+	NA
7973694	0.0202181	660	0.979307	-0.0350532	LTB4R2	FALSE	chr14	24308954	+	NA
8121632	0.020227	661	0.979307	-0.0564385	KPNA5	FALSE	chr6	116681203	+	NA
8151054	0.0202331	662	0.979307	-0.0564358	RN7SKP135	FALSE	chr8	63609600	-	NA
8092065	0.0202542	663	0.979307	-0.0586359	NA	FALSE	NA	NA	NA	NA
8007441	0.0202634	664	0.979307	-0.0446289	RPL27	TRUE	chr17	42998433	+	NA
8126371	0.0202783	665	0.979307	0.043541	CCND3	TRUE	chr6	41941519	-	NA
8035175	0.0203325	666	0.979307	0.0484025	RN7SL146P	FALSE	chr19	16539984	-	rs1870071
8082786	0.0204141	667	0.979307	-0.0510341	NA	FALSE	chr3	133551185	+	NA
7943605	0.0204255	668	0.979307	0.0622006	ACAT1	FALSE	chr11	108121515	+	NA
7984016	0.0204324	669	0.979307	0.0563799	C2CD4A	FALSE	chr15	62066976	+	NA
8097120	0.0204531	670	0.979307	-0.0563398	NA	FALSE	NA	NA	NA	NA
7896133	0.0204573	671	0.979307	0.0602377	NA	FALSE	NA	NA	NA	NA
8137435	0.0204575	672	0.979307	-0.0760589	NA	FALSE	NA	NA	NA	NA
7932512	0.0204994	673	0.979307	-0.0487606	DNAJC1	FALSE	chr10	22003725	-	NA
7919055	0.0205305	674	0.979307	-0.046097	HMGCS2	FALSE	chr1	119768905	-	rs666930
8014257	0.0205324	675	0.979307	-0.0880384	SLFN12L	FALSE	chr17	35537861	-	NA
8055862	0.0205431	676	0.979307	0.0413331	ARL5A	FALSE	chr2	151791790; 151792086; 151828441; 151828465; 151828468; 151828488; 151828492	-	NA
8075160	0.0205509	677	0.979307	0.0601917	RN7SL757P	FALSE	chr22	28056453	-	NA
8100714	0.0205577	678	0.979307	0.0434791	YTHDC1	FALSE	chr4	68350089	-	NA
8162147	0.0205845	679	0.979307	0.0512247	ZCCHC6	FALSE	chr9	86319644; 86324653; 86343123; 86352706; 86354410; 86354412; 86354454	-	NA
8117987	0.0205877	680	0.979307	0.0483022	C6orf136	FALSE	chr6	30647038	+	NA
8033969	0.0206041	681	0.979307	0.0283123	RAVER1	FALSE	chr19	10333638	-	rs2288904; rs34536443; rs8112449
8129095	0.0206202	682	0.979307	-0.0460651	NA	FALSE	NA	NA	NA	NA
8033987	0.0206723	683	0.979307	-0.0567215	ICAM3	FALSE	chr19	10339823	-	rs2288904; rs34536443; rs8112449
7948910	0.020679	684	0.979307	0.192331	SNORD25	FALSE	chr11	62855632	-	NA
8180203	0.0207106	685	0.979307	0.0434255	NA	FALSE	NA	NA	NA	NA
8074978	0.020731	686	0.979307	-0.102525	NA	FALSE	NA	NA	NA	NA
7949383	0.0207515	687	0.979307	0.0340028	SYVN1	FALSE	chr11	65134532	-	NA
8092457	0.0207642	688	0.979307	0.0332604	ALG3	TRUE	chr3	184249548	-	NA
7895870	0.0208351	689	0.979307	-0.182723	NA	FALSE	NA	NA	NA	NA
8149774	0.0208916	690	0.979307	-0.0518731	LOXL2	FALSE	chr8	23404240	-	NA
7925950	0.0209103	691	0.979307	-0.0566188	UCN3	FALSE	chr10	5365008	+	NA
8130422	0.0209792	692	0.979307	-0.0543298	CNKSR3	FALSE	chr6	154510659	-	NA
8155169	0.021009	693	0.979307	0.0433221	RECK	FALSE	chr9	36036432	+	NA
8029996	0.0210293	694	0.979307	0.0535123	C19orf68	FALSE	chr19	48170691	+	NA
7893889	0.0210311	695	0.979307	-0.123754	NA	FALSE	NA	NA	NA	NA
8173364	0.0210716	696	0.979307	0.0739713	RN7SL581P	FALSE	NA	NA	NA	NA
8083282	0.021101	697	0.979307	0.0516687	HPS3	FALSE	chr3	149129583	+	NA
7894336	0.0211109	698	0.979307	0.0573907	NA	FALSE	NA	NA	NA	NA
7980140	0.0211482	699	0.979307	-0.0688369	RPS2P2	FALSE	NA	NA	NA	NA
7977592	0.0211513	700	0.979307	0.113842	GAFA1	FALSE	NA	NA	NA	NA
7913799	0.0211573	701	0.979307	-0.0485161	NA	FALSE	NA	NA	NA	NA
7970831	0.0211763	702	0.979307	0.0395786	UBL3	FALSE	chr13	29850684	-	NA
8097647	0.0212482	703	0.979307	0.0534192	ABCE1	FALSE	chr4	145097931; 145098287; 145098310; 145098310; 145098313; 145108026; 145121009; 145121033; 145121319; 145122868	+	NA
8166094	0.0212546	704	0.979307	0.0662946	RN7SKP20	FALSE	NA	NA	NA	NA
7934896	0.0212791	705	0.979307	-0.13291	NA	FALSE	NA	NA	NA	NA
8123372	0.0212838	706	0.979307	-0.0414032	NA	FALSE	NA	NA	NA	NA
8028872	0.0212878	707	0.979307	0.0350621	LTBP4	TRUE	chr19	40597234	+	NA
7949916	0.0213099	708	0.979307	0.0463229	CHKA	FALSE	chr11	68121204	-	NA
8021716	0.0213485	709	0.979307	0.059275	TIMM21	FALSE	chr18	74148510	+	NA
7893468	0.0213733	710	0.979307	-0.123448	NA	FALSE	NA	NA	NA	NA
7999364	0.0214218	711	0.979307	-0.0529711	GRIN2A	FALSE	chr16	10182754	-	NA
7896263	0.0214893	712	0.979307	-0.0620643	NA	FALSE	NA	NA	NA	NA
7935834	0.021582	713	0.979307	-0.0505837	PDZD7	FALSE	chr10	101031157	-	NA
8015445	0.0216078	714	0.979307	-0.160247	NT5C3B	FALSE	chr17	41836263	-	rs2293152
7895882	0.0216728	715	0.979307	-0.107237	NA	FALSE	NA	NA	NA	NA
7894624	0.0216861	716	0.979307	-0.061974	NA	FALSE	NA	NA	NA	NA
8026047	0.0217902	717	0.979307	-0.0412464	JUNB	FALSE	chr19	12791495	+	NA
8001371	0.0218023	718	0.979307	-0.0872152	NA	FALSE	NA	NA	NA	NA
8151123	0.0218462	719	0.979307	-0.0562243	PTTG3P	FALSE	NA	NA	NA	NA
8175330	0.0218815	720	0.979307	0.0590273	RNA5SP515	FALSE	NA	NA	NA	NA
7953749	0.021919	721	0.979307	0.128037	CLEC4D	FALSE	chr12	8513539	+	NA
8146357	0.0219361	722	0.979307	-0.0527696	MCM4	FALSE	chr8	47960935	+	NA
7895428	0.0219491	723	0.979307	0.285751	NA	FALSE	NA	NA	NA	NA
7959205	0.0219643	724	0.979307	0.046087	MLEC	TRUE	chr12	120686868	+	NA
7895296	0.0219871	725	0.979307	0.152397	NA	FALSE	NA	NA	NA	NA
7970428	0.0220122	726	0.979307	-0.0455848	ZMYM5	FALSE	chr13	19863508	-	NA
7904203	0.022023	727	0.979307	-0.0504191	TSHB	FALSE	chr1	115029823	+	NA
8134420	0.0220392	728	0.979307	-0.0683864	TAC1	FALSE	chr7	97731907	+	NA
8056184	0.0220796	729	0.979307	0.0556475	ITGB6	FALSE	chr2	160112110; 160200252; 160200258; 160200301; 160200304; 160200304; 160200313; 160253849; 160271249; 160271880; 160271888	-	NA
7894620	0.0221112	730	0.979307	-0.132129	NA	FALSE	NA	NA	NA	NA
8152719	0.022131	731	0.979307	-0.0556356	ANXA13	FALSE	chr8	123737402	-	NA
8015031	0.0221558	732	0.979307	-0.0808812	CCR7	FALSE	chr17	40565472	-	NA
7997500	0.0222083	733	0.979307	0.0658001	NA	FALSE	NA	NA	NA	NA
8005134	0.0222458	734	0.979307	0.0530052	ADORA2B	FALSE	chr17	15944916	+	NA
8126238	0.0222929	735	0.979307	0.0694427	NA	FALSE	NA	NA	NA	NA
8175977	0.0223519	736	0.979307	0.0335821	IRAK1	FALSE	NA	NA	NA	NA
7893037	0.022353	737	0.979307	-0.0750009	NA	FALSE	NA	NA	NA	NA
8008588	0.0223673	738	0.979307	-0.0648987	HLF	FALSE	chr17	55265011	+	NA
7932449	0.0223676	739	0.979307	-0.074993	NA	FALSE	NA	NA	NA	NA
8175250	0.0223728	740	0.979307	-0.0526016	MIR19B2	FALSE	NA	NA	NA	NA
8127107	0.0223938	741	0.979307	-0.15938	NA	FALSE	NA	NA	NA	NA
7942284	0.022407	742	0.979307	-0.0559947	DEFB108B	FALSE	chr11	71833199	+	NA
8094136	0.022407	743	0.979307	-0.0559947	DEFB108B	FALSE	chr11	71833199	+	NA
7976128	0.0224085	744	0.979307	0.0529392	TTC8	FALSE	chr14	88824152	+	NA
8073330	0.0224283	745	0.979307	0.0822176	NA	FALSE	NA	NA	NA	NA
8068608	0.0224323	746	0.979307	-0.0767648	RPL23AP12	FALSE	NA	NA	NA	NA
7940688	0.0224395	747	0.979307	-0.0410831	POLR2G	FALSE	chr11	62761543	+	NA
8140859	0.0224575	748	0.979307	0.0587657	MTERF1	FALSE	chr7	91880720	-	NA
7944765	0.0225189	749	0.979307	0.112604	NA	FALSE	NA	NA	NA	NA
7942647	0.0225437	750	0.979307	0.0809627	LOC100506127	FALSE	NA	NA	NA	NA
8148358	0.0225571	751	0.979307	0.0347216	PHF20L1	FALSE	chr8	132775357	+	NA
7993369	0.0225849	752	0.979307	-0.0758867	NA	FALSE	NA	NA	NA	NA
7959153	0.0225915	753	0.979307	-0.0324342	COX6A1	TRUE	chr12	120438089	+	NA
8000574	0.0226067	754	0.979307	-0.059799	NUPR1	FALSE	chr16	28539008	-	NA
8124798	0.0226346	755	0.979307	-0.0317419	PPP1R18	FALSE	chr6	30684744; 30687158; 30687193; 30687216; 30687895; 30687895	-	NA
8002590	0.0227212	756	0.979307	-0.0623782	SNORA70D	FALSE	chr16	71698701	-	NA
8097036	0.022805	757	0.979307	-0.0524381	RNU6-119P	FALSE	chr4	116839278	+	NA
8176675	0.0229679	758	0.979307	0.0474165	XKRY2	FALSE	NA	NA	NA	NA
8177180	0.0229679	759	0.979307	0.0474165	XKRY2	FALSE	NA	NA	NA	NA
8012349	0.0229889	760	0.979307	0.139025	PER1	FALSE	chr17	8152435	-	NA
7926531	0.0230374	761	0.979307	0.0690492	ARL5B	FALSE	chr10	18659404	+	NA
8041536	0.0230869	762	0.979307	0.0865479	CYP1B1-AS1	FALSE	chr2	38108072	+	NA
7893290	0.0231042	763	0.979307	0.151051	NA	FALSE	NA	NA	NA	NA
7893593	0.0231303	764	0.979307	-0.055706	NA	FALSE	NA	NA	NA	NA
7984631	0.0231801	765	0.979307	-0.0745631	HEXA-AS1	FALSE	chr15	72376112	+	NA
8003939	0.0231842	766	0.979307	-0.0436692	TM4SF5	FALSE	chr17	4771891	+	NA
8180386	0.0234086	767	0.979307	-0.0522142	NA	FALSE	NA	NA	NA	NA
7988438	0.0234207	768	0.979307	-0.0551249	NA	FALSE	NA	NA	NA	NA
7892948	0.0234254	769	0.979307	-0.0483043	NA	FALSE	NA	NA	NA	NA
8125530	0.023473	770	0.979307	-0.0498972	HLA-DMB	FALSE	chr6	32941070	-	NA
8072757	0.0235256	771	0.979307	0.0472206	CSF2RB	FALSE	chr22	36913627	+	NA
7998367	0.0235715	772	0.979307	0.0407919	RPUSD1	FALSE	chr16	788383	-	rs2744148
7893111	0.0235901	773	0.979307	-0.1308	NA	FALSE	NA	NA	NA	NA
8163908	0.0236437	774	0.979307	-0.138418	GGTA1P	FALSE	NA	NA	NA	NA
8067087	0.0236533	775	0.979307	0.0524479	SALL4	FALSE	chr20	51802520	-	NA
7895511	0.023674	776	0.979307	-0.10575	NA	FALSE	NA	NA	NA	NA
8150559	0.0237284	777	0.979307	0.0454806	THAP1	FALSE	chr8	42843325	-	NA
7932796	0.0237304	778	0.979307	-0.0520969	SVIL	FALSE	chr10	29735804	-	NA
7901634	0.0237438	779	0.979307	-0.0481967	MROH7	FALSE	chr1	54641792	+	NA
8167161	0.0237441	780	0.979307	-0.0799848	NA	FALSE	NA	NA	NA	NA
8040286	0.0237461	781	0.979307	-0.0549998	RNU6-1081P	FALSE	chr2	11233987	+	NA
8003700	0.0237484	782	0.979307	0.0284583	OVCA2	FALSE	chr17	2041935	+	NA
8156718	0.0237555	783	0.979307	0.0388127	NCBP1	FALSE	chr9	97633625	+	NA
8053057	0.0237713	784	0.979307	-0.11206	RNA5SP97	FALSE	chr2	73968206	-	NA
7960848	0.023775	785	0.979307	-0.055455	NA	FALSE	NA	NA	NA	NA
7893383	0.0238313	786	0.979307	-0.121363	NA	FALSE	NA	NA	NA	NA
8117377	0.0239089	787	0.979307	-0.0481414	HIST1H1E	FALSE	chr6	26156353	+	NA
8151136	0.0239182	788	0.979307	0.0423757	COPS5	FALSE	chr8	67062317	-	NA
8098261	0.023948	789	0.979307	0.066952	NA	FALSE	chr4	168471408	+	NA
7893422	0.0239525	790	0.979307	0.0423295	NA	FALSE	NA	NA	NA	NA
7906486	0.0239687	791	0.979307	0.137983	SLAMF8	FALSE	chr1	159826749	+	NA
7892834	0.0239922	792	0.979307	0.176256	NA	FALSE	NA	NA	NA	NA
7963946	0.0240091	793	0.979307	0.0586103	MMP19	FALSE	chr12	55842922	-	NA
7893052	0.0240171	794	0.979307	-0.142705	NA	FALSE	NA	NA	NA	NA
8121681	0.0240505	795	0.979307	0.0648957	RN7SKP18	FALSE	chr6	117299363	+	NA
8169640	0.0240564	796	0.979307	-0.0320977	SLC25A5	FALSE	NA	NA	NA	NA
7892804	0.0240625	797	0.979307	0.125926	NA	FALSE	NA	NA	NA	NA
7911323	0.0240724	798	0.979307	-0.0475057	FAM138A	FALSE	chr1	36081; 36073	-	NA
8031984	0.0240724	799	0.979307	-0.0475057	FAM138A	FALSE	chr1	36081; 36073	-	NA
8147689	0.0240945	800	0.979307	0.0648748	RN7SL685P	FALSE	chr8	100957882	+	NA
8030997	0.0241119	801	0.979307	0.0800136	ZNF813	FALSE	chr19	53467734	+	NA
8074632	0.0241584	802	0.979307	-0.0405525	KLHL22	FALSE	chr22	20495883	-	NA
8060627	0.0242652	803	0.979307	0.0342889	ATRN	FALSE	chr20	3471107; 3471039	+	NA
7977418	0.0242748	804	0.979307	0.0504422	C14orf80	FALSE	chr14	105491248	+	NA
8127854	0.0242841	805	0.979307	0.14969	ME1	FALSE	chr6	83431071	-	NA
7969374	0.0242885	806	0.979307	0.0721732	BORA	FALSE	chr13	72727903	+	NA
7908407	0.0243139	807	0.979307	0.0323819	RPS27A	TRUE	chr2	55231902	+	NA
8081454	0.0243848	808	0.979307	-0.124272	NA	FALSE	NA	NA	NA	NA
8155896	0.0243877	809	0.979307	-0.0749453	NA	FALSE	NA	NA	NA	NA
7947015	0.0244472	810	0.979307	0.0347613	TSG101	FALSE	chr11	18527232	-	NA
8132860	0.0244823	811	0.979307	-0.0404622	EGFR	FALSE	chr7	55019100	+	NA
7895598	0.0245178	812	0.979307	-0.0518154	NA	FALSE	NA	NA	NA	NA
8172307	0.0245283	813	0.979307	0.0475111	ZNF41	FALSE	NA	NA	NA	NA
7892613	0.0245434	814	0.979307	-0.0546996	NA	FALSE	NA	NA	NA	NA
8097128	0.0246053	815	0.979307	0.0503227	EXOSC9	FALSE	chr4	121801316	+	NA
8067279	0.0246299	816	0.979307	-0.0495002	CTSZ	FALSE	chr20	59007247	-	NA
7893631	0.0246914	817	0.979307	-0.120677	NA	FALSE	NA	NA	NA	NA
7896032	0.0247031	818	0.979307	-0.149157	NA	FALSE	NA	NA	NA	NA
8055594	0.0247639	819	0.979307	-0.0854439	NA	FALSE	NA	NA	NA	NA
7901895	0.0247917	820	0.979307	0.0520181	ATG4C	FALSE	chr1	62784134	+	NA
8148149	0.024795	821	0.979307	0.0520169	ZHX2	FALSE	chr8	122781393	+	NA
8152340	0.0248195	822	0.979307	0.0474127	NUDCD1	FALSE	chr8	109329934	-	NA
7972743	0.0248514	823	0.979307	-0.06706	RNA5SP39	FALSE	chr13	108301331	-	NA
8135907	0.0248783	824	0.979307	-0.0494171	MIR129-1	FALSE	chr7	128207870	+	NA
8009430	0.0249066	825	0.979307	0.0384941	LOC440461	FALSE	NA	NA	NA	NA
8001030	0.0249665	826	0.979307	-0.0312262	PYCARD	FALSE	chr16	31202992	-	NA
7895307	0.0249689	827	0.979307	-0.177779	NA	FALSE	NA	NA	NA	NA
7896554	0.0249889	828	0.979307	0.0420172	NA	FALSE	NA	NA	NA	NA
8126920	0.0250039	829	0.979307	0.057675	CRISP1	FALSE	chr6	49866528	-	NA
8171205	0.0251375	830	0.979307	-0.0569526	NLGN4X	FALSE	NA	NA	NA	NA
7895160	0.0251688	831	0.979307	-0.0445857	NA	FALSE	NA	NA	NA	NA
8088476	0.0251959	832	0.979307	-0.120283	NA	FALSE	NA	NA	NA	NA
8048110	0.025281	833	0.979307	-0.0548908	NA	FALSE	NA	NA	NA	NA
8040334	0.0253497	834	0.979307	0.062338	NA	FALSE	NA	NA	NA	NA
8120983	0.0253576	835	0.979307	-0.0492587	HTR1E	FALSE	chr6	86937305	+	NA
7980306	0.0253784	836	0.979307	-0.0621488	NA	FALSE	NA	NA	NA	NA
8007429	0.0253938	837	0.979307	-0.0548497	G6PC	FALSE	chr17	42900797	+	NA
7955425	0.0254173	838	0.979307	0.0465853	ATF1	FALSE	chr12	50764291	+	NA
7897737	0.0254241	839	0.979307	0.0517867	DRAXIN	FALSE	chr1	11691728	+	NA
7896609	0.025432	840	0.979307	-0.0621268	NA	FALSE	NA	NA	NA	NA
8169145	0.0254369	841	0.979307	-0.0612273	MUM1L1	FALSE	NA	NA	NA	NA
7912133	0.0254659	842	0.979307	-0.0586349	LOC100129476	FALSE	NA	NA	NA	NA
8180330	0.0254879	843	0.979307	0.0169708	NA	FALSE	NA	NA	NA	NA
7984952	0.0255397	844	0.979307	-0.0491991	C15orf39	FALSE	chr15	75201876	+	NA
7895619	0.0255619	845	0.979307	0.064198	NA	FALSE	NA	NA	NA	NA
8054075	0.025577	846	0.979307	0.0803293	UBTFL1	FALSE	chr11	90085949	+	NA
8014454	0.0255845	847	0.979307	-0.0401624	MYO19	FALSE	chr17	36534868	-	NA
7959146	0.0256005	848	0.979307	-0.0543141	NME2P1	FALSE	NA	NA	NA	NA
7902439	0.025602	849	0.979307	0.0803152	RNU6-161P	FALSE	chr1	76753134	+	NA
8052331	0.025618	850	0.979307	0.0677667	PNPT1	FALSE	chr2	55693910	-	NA
7896164	0.0257261	851	0.979307	-0.0849073	NA	FALSE	NA	NA	NA	NA
8129773	0.0257778	852	0.979307	0.039755	BCLAF1	FALSE	chr6	136289851	-	NA
7942809	0.0257942	853	0.979307	-0.0585085	LOC101928921	FALSE	NA	NA	NA	NA
8056206	0.0258149	854	0.979307	-0.0443946	RBMS1	FALSE	chr2	160276685; 160277372; 160279766; 160283100; 160284867; 160318203; 160367526; 160407889; 160408609; 160416178; 160416178; 160492969; 160493379; 160493482; 160493794	-	NA
7896135	0.0258607	855	0.979307	0.124279	NA	FALSE	NA	NA	NA	NA
8028248	0.0258818	856	0.979307	0.064055	ZNF570	FALSE	chr19	37469079	+	NA
7922460	0.0259002	857	0.979307	-0.084812	NA	FALSE	NA	NA	NA	NA
8018295	0.0260405	858	0.979307	-0.0504321	NA	FALSE	NA	NA	NA	NA
8029301	0.0261254	859	0.979307	0.0463581	ZNF575	FALSE	chr19	43533203	+	NA
8071147	0.0261558	860	0.979307	-0.0490004	TUBA8	FALSE	chr22	18110686	+	NA
8170971	0.0261736	861	0.979307	0.0338358	DKC1	FALSE	NA	NA	NA	NA
7894550	0.0261864	862	0.979307	-0.0541063	NA	FALSE	NA	NA	NA	NA
7917707	0.0261967	863	0.979307	-0.0489874	EVI5	FALSE	chr1	92792404	-	rs11810217; rs41286801
7932086	0.0262948	864	0.979307	0.0674492	RNA5SP300	FALSE	chr10	12924785	-	NA
8132248	0.0263943	865	0.979307	-0.085005	NA	FALSE	NA	NA	NA	NA
7957528	0.0264144	866	0.979307	-0.0617307	NA	FALSE	NA	NA	NA	NA
7905198	0.0264623	867	0.979307	-0.0442072	TARS2	FALSE	chr1	150487416	+	NA
8000346	0.0264724	868	0.979307	-0.0488999	ERN2	FALSE	chr16	23713500	-	NA
7892778	0.0264735	869	0.979307	0.084454	NA	FALSE	NA	NA	NA	NA
8023481	0.0264798	870	0.979307	0.034685	NARS	FALSE	chr18	57622173	-	NA
7895003	0.0264824	871	0.979307	0.0539023	NA	FALSE	NA	NA	NA	NA
7893674	0.0265402	872	0.979307	0.393866	NA	FALSE	NA	NA	NA	NA
7988838	0.02658	873	0.979307	0.0529153	LEO1	FALSE	chr15	51971776	-	NA
7901135	0.0266047	874	0.979307	0.0395319	TMEM69	FALSE	chr1	45687213	+	NA
7893155	0.0266147	875	0.979307	-0.147388	NA	FALSE	NA	NA	NA	NA
7931778	0.0267011	876	0.979307	0.0468001	PITRM1	FALSE	chr10	3172841	-	NA
8011062	0.0267124	877	0.979307	-0.0308666	INPP5K	TRUE	chr17	1516742	-	NA
8177851	0.0268052	878	0.979307	0.0512984	C6orf136	FALSE	chr6	30647072	+	NA
8179167	0.0268052	879	0.979307	0.0512984	C6orf136	FALSE	chr6	30647072	+	NA
7965510	0.026902	880	0.979307	0.0574342	TMCC3	FALSE	chr12	94650562	-	NA
8133959	0.0269267	881	0.979307	-0.0606399	NA	FALSE	NA	NA	NA	NA
8147683	0.0269477	882	0.979307	-0.0737058	NA	FALSE	NA	NA	NA	NA
7949615	0.026972	883	0.979307	-0.0597783	B3GNT1	FALSE	chr11	66347692	-	NA
8054758	0.0269985	884	0.979307	-0.154761	DDX11L2	FALSE	NA	NA	NA	NA
7973350	0.0270096	885	0.979307	-0.0597641	NA	FALSE	NA	NA	NA	NA
7894331	0.0270138	886	0.979307	-0.0614952	NA	FALSE	NA	NA	NA	NA
8080138	0.027031	887	0.979307	-0.0736672	IQCF2	FALSE	chr3	51861637	+	NA
8037688	0.0270905	888	0.979307	-0.0314535	RSPH6A	FALSE	chr19	45815319	-	NA
7952897	0.0271007	889	0.979307	0.0466749	IQSEC3	FALSE	chr12	66764	+	NA
7897849	0.0271094	890	0.979307	0.0345393	MIIP	FALSE	chr1	12029095	+	NA
7893494	0.0271133	891	0.979307	0.0511925	NA	FALSE	NA	NA	NA	NA
8026488	0.0271413	892	0.979307	-0.0605576	OR10H5	FALSE	chr19	15793950	+	NA
7988444	0.0271954	893	0.979307	0.061553	MYEF2	FALSE	chr15	48178517	-	NA
8167441	0.0272236	894	0.979307	-0.0694156	RNU4-52P	FALSE	NA	NA	NA	NA
8156604	0.027262	895	0.979307	0.04941	ERCC6L2	FALSE	chr9	95923352; 95876142; 95915800; 95875700; 95941503; 95966649; 95922401; 95972836	+	NA
8116992	0.0273925	896	0.979307	-0.121938	NA	FALSE	NA	NA	NA	NA
7892805	0.0274472	897	0.979307	-0.154347	NA	FALSE	NA	NA	NA	NA
8174717	0.0274629	898	0.979307	0.06337	UPF3B	FALSE	NA	NA	NA	NA
7954527	0.0274833	899	0.979307	0.0781442	ARNTL2	FALSE	chr12	27333054	+	NA
7892512	0.0274921	900	0.979307	-0.0839653	NA	FALSE	NA	NA	NA	NA
7958056	0.0275156	901	0.979307	-0.0335464	STAB2	FALSE	chr12	103587272	+	NA
8170882	0.0275278	902	0.979307	0.0269341	ATP6AP1	TRUE	NA	NA	NA	NA
7922095	0.0275519	903	0.979307	-0.0377987	MPC2	FALSE	chr1	167937040	-	NA
8180387	0.0275545	904	0.979307	-0.0507976	NA	FALSE	NA	NA	NA	NA
8052089	0.0276282	905	0.979307	-0.0485413	NA	FALSE	chr2	49888986	-	NA
8129861	0.0276288	906	0.979307	0.0458929	IFNGR1	FALSE	chr6	137219449	-	rs13192841; rs17066096; rs7769192
7931029	0.0276322	907	0.979307	-0.0626543	NA	FALSE	NA	NA	NA	NA
8160284	0.0276822	908	0.979307	0.0613538	HAUS6	FALSE	chr9	19065084; 19093213; 19103119	-	NA
7982248	0.0277333	909	0.979307	-0.121688	NA	FALSE	NA	NA	NA	NA
8134678	0.0277484	910	0.979307	0.0667907	NA	FALSE	chr7	99952032	+	NA
7976840	0.0277493	911	0.979307	-0.0838324	MIR487A	FALSE	chr14	101052423	+	NA
7928314	0.0277754	912	0.979307	-0.0977943	RNU6-805P	FALSE	chr10	72391963	+	NA
7894212	0.0277824	913	0.979307	0.0458467	NA	FALSE	NA	NA	NA	NA
7892618	0.0278059	914	0.979307	-0.0740815	NA	FALSE	NA	NA	NA	NA
7986822	0.0278185	915	0.979307	0.0565773	GABRB3	FALSE	chr15	26773074	-	NA
7973468	0.0278286	916	0.979307	0.0412163	LRRC16B	FALSE	chr14	24051999	+	NA
8017061	0.0278421	917	0.979307	-0.046912	TEX14	FALSE	chr17	58692023	-	NA
7985352	0.0278734	918	0.979307	-0.0506964	C15orf26	FALSE	NA	NA	NA	NA
7929596	0.0279157	919	0.979307	0.0391902	LCOR	FALSE	chr10	96832281	+	NA
8102210	0.0279648	920	0.979307	0.0631598	NA	FALSE	NA	NA	NA	NA
8180249	0.0279959	921	0.979307	0.061227	NA	FALSE	NA	NA	NA	NA
7935180	0.0279976	922	0.979307	-0.0976624	PDLIM1	FALSE	chr10	95291024	-	NA
8099326	0.0280554	923	0.979307	-0.048412	SLC2A9	FALSE	chr4	10021483	-	NA
8122742	0.0281192	924	0.979307	-0.0506191	NA	FALSE	NA	NA	NA	NA
8139784	0.0281578	925	0.979307	-0.0534351	NA	FALSE	NA	NA	NA	NA
8023308	0.0281836	926	0.979307	-0.0593275	NA	FALSE	NA	NA	NA	NA
7894858	0.0281962	927	0.979307	0.0276082	NA	FALSE	NA	NA	NA	NA
7984802	0.0282459	928	0.979307	0.0457084	ISLR2	FALSE	chr15	74129373	+	NA
8006237	0.0282468	929	0.979307	-0.0835783	LOC400590	FALSE	NA	NA	NA	NA
7907308	0.0282634	930	0.979307	-0.0505739	NA	FALSE	NA	NA	NA	NA
8079420	0.0282946	931	0.979307	-0.0483404	LRRC2-AS1	FALSE	chr3	46557403	+	NA
7968734	0.0283257	932	0.979307	-0.060113	SLC25A15	FALSE	chr13	40789496	+	NA
8027169	0.0283656	933	0.979307	0.0275782	GATAD2A	FALSE	chr19	19385832	+	NA
7899750	0.0283856	934	0.979307	0.0507659	FAM167B	FALSE	chr1	32247232	+	NA
7928408	0.0284558	935	0.979307	0.0507428	ZSWIM8	FALSE	chr10	73785654	+	rs2688608
8104124	0.0284959	936	0.979307	-0.0482805	FRG2	FALSE	chr4	190027257	-	NA
7912349	0.0284965	937	0.979307	-0.0421634	C1orf127	FALSE	chr1	10982037	-	NA
7950235	0.0286422	938	0.979307	0.0700471	STARD10	FALSE	chr11	72793681	-	NA
7985037	0.0286768	939	0.979307	0.0700314	RN7SL319P	FALSE	chr15	75785133	+	NA
8087825	0.0286934	940	0.979307	0.038994	ABHD14B	FALSE	chr3	51974066	-	NA
7892897	0.0287148	941	0.979307	0.180926	NA	FALSE	NA	NA	NA	NA
8029710	0.0287252	942	0.979307	-0.0311317	VASP	FALSE	chr19	45507415	+	NA
7983350	0.0287349	943	0.979307	0.0409756	EIF3J	FALSE	chr15	44537182	+	NA
8078567	0.0287829	944	0.979307	-0.0460759	NA	FALSE	NA	NA	NA	NA
8129254	0.0288096	945	0.979307	-0.043559	MAN1A1	FALSE	chr6	119349761	-	NA
8094830	0.028822	946	0.979307	0.0321123	TMEM33	FALSE	chr4	41935119	+	NA
8099982	0.0288587	947	0.979307	-0.213162	APBB2	FALSE	chr4	41214618	-	NA
8104074	0.0289307	948	0.979307	0.0647026	MTNR1A	FALSE	chr4	186555567	-	NA
7897422	0.0289687	949	0.979307	-0.0628927	NA	FALSE	NA	NA	NA	NA
8051234	0.0290191	950	0.979307	-0.0598601	NA	FALSE	NA	NA	NA	NA
7995069	0.0290442	951	0.979307	0.0374459	FUS	TRUE	chr16	31180138	+	NA
8093272	0.0290579	952	0.979307	0.0608068	ANKRD18DP	FALSE	NA	NA	NA	NA
7917503	0.02906	953	0.979307	0.180504	GBP3	FALSE	chr1	89022882	-	NA
8069541	0.0291367	954	0.979307	0.0626815	SAMSN1	FALSE	chr21	14583402	-	NA
8162216	0.0291402	955	0.979307	-0.0392653	SHC3	FALSE	chr9	89178767	-	NA
7971165	0.0291727	956	0.979307	-0.053105	NA	FALSE	NA	NA	NA	NA
8013753	0.0291843	957	0.979307	-0.0434597	RAB34	FALSE	chr17	28718166	-	NA
8104441	0.029206	958	0.979307	-0.0606699	RNU1-76P	FALSE	chr5	7980145	+	NA
8098822	0.0292062	959	0.979307	-0.0392813	DGKQ	FALSE	chr4	973556	-	NA
7911112	0.0292168	960	0.979307	-0.061519	EFCAB2	FALSE	chr1	244969981	+	NA
7926486	0.0292405	961	0.979307	0.0504885	SLC39A12	FALSE	chr10	17951838	+	NA
7964658	0.029244	962	0.979307	-0.102111	RNU1-83P	FALSE	chr12	62850901	-	NA
8174228	0.0292747	963	0.979307	-0.048052	TCEAL8	FALSE	NA	NA	NA	NA
8050507	0.0293222	964	0.979307	0.0645407	WDR35	FALSE	chr2	19990131	-	NA
7915485	0.0293556	965	0.979307	0.0408145	EBNA1BP2	FALSE	chr1	43172570	-	NA
8145122	0.0293672	966	0.979307	0.0437759	SLC39A14	FALSE	chr8	22367304	+	NA
8176681	0.0293982	967	0.979307	-0.0534831	HSFY1	FALSE	NA	NA	NA	NA
8177201	0.0293982	968	0.979307	-0.0534831	HSFY1	FALSE	NA	NA	NA	NA
7949792	0.0294075	969	0.979307	-0.0513414	PTPRCAP	FALSE	chr11	67438067	-	NA
8110463	0.0294106	970	0.979307	0.0559986	ZNF354B	FALSE	chr5	178859952	+	NA
8146051	0.0294372	971	0.979307	-0.0530206	ADAM5	FALSE	NA	NA	NA	NA
7935756	0.029451	972	0.979307	-0.0458896	PKD2L1	FALSE	chr10	100329940; 100329972; 100330264; 100330486	-	NA
7975630	0.0294565	973	0.979307	-0.0716169	NA	FALSE	NA	NA	NA	NA
7896598	0.0295092	974	0.979307	-0.117167	NA	FALSE	NA	NA	NA	NA
8164006	0.0295098	975	0.979307	-0.1449	NA	FALSE	NA	NA	NA	NA
8120057	0.029511	976	0.979307	0.179958	NA	FALSE	NA	NA	NA	NA
8093320	0.029609	977	0.979307	0.107091	ZNF718	FALSE	chr4	124479	+	NA
8159581	0.0296533	978	0.979307	-0.0512659	NA	FALSE	NA	NA	NA	NA
8029465	0.029694	979	0.979307	0.052783	BCL3	FALSE	chr19	44748546	+	NA
8097600	0.0297023	980	0.979307	0.0319351	SMARCA5	FALSE	chr4	143513462	+	NA
8174648	0.0297082	981	0.979307	0.0624543	CT83	FALSE	NA	NA	NA	NA
8174340	0.0297454	982	0.979307	0.0486244	RBM41	FALSE	NA	NA	NA	NA
8085374	0.0297571	983	0.979307	-0.02661	RAF1	FALSE	chr3	12664226	-	NA
8042696	0.0297588	984	0.979307	-0.0529188	SPR	FALSE	chr2	72887359	+	NA
7941879	0.0297692	985	0.979307	-0.0433069	TBC1D10C	FALSE	chr11	67403914	+	NA
8158224	0.029796	986	0.979307	-0.0359305	SLC27A4	FALSE	chr9	128340727	+	NA
7923798	0.0298051	987	0.979307	0.0406998	NUCKS1	FALSE	chr1	205750276	-	NA
7917591	0.0298309	988	0.979307	0.0643329	NA	FALSE	NA	NA	NA	NA
7983867	0.0298716	989	0.979307	-0.0587261	CGNL1	FALSE	chr15	57375966; 57376504; 57377145	+	NA
8149833	0.029873	990	0.979307	-0.0500832	RNU1-148P	FALSE	chr8	24077158	-	NA
7893798	0.0298912	991	0.979307	0.120929	NA	FALSE	NA	NA	NA	NA
7934411	0.0299401	992	0.979307	-0.0500633	USP54	FALSE	chr10	73575675	-	rs2688608
8010287	0.0299518	993	0.979307	0.0406626	C1QTNF1	FALSE	chr17	79022933	+	NA
7939420	0.0299876	994	0.979307	-0.0532955	NA	FALSE	NA	NA	NA	NA
8142522	0.0300312	995	0.979307	-0.116816	NA	FALSE	NA	NA	NA	NA
8050875	0.0300506	996	0.979307	0.0318662	ASXL2	FALSE	chr2	25878516	-	NA
7976061	0.0301361	997	0.979307	0.0900923	NA	FALSE	NA	NA	NA	NA
8134599	0.0301399	998	0.979307	0.0371902	CPSF4	FALSE	chr7	99438921	+	NA
7938066	0.0301746	999	0.979307	-0.060322	OR56A3	FALSE	chr11	5947339	+	NA
8133192	0.0302002	1000	0.979307	0.0264822	TMEM248	FALSE	chr7	66921224	+	NA
7893065	0.0302014	1001	0.979307	-0.116703	NA	FALSE	NA	NA	NA	NA
7893616	0.0302958	1002	0.979307	-0.0531987	NA	FALSE	NA	NA	NA	NA
7975645	0.0303074	1003	0.979307	-0.0327341	ZNF410	FALSE	chr14	73886870	+	NA
7982957	0.030327	1004	0.979307	0.0405683	MGA	FALSE	chr15	41660411	+	NA
7940711	0.0303594	1005	0.979307	-0.0301762	TMEM179B	FALSE	chr11	62787426	+	NA
7905339	0.0303668	1006	0.979307	-0.0487049	GABPB2	FALSE	chr1	151070603	+	NA
7901192	0.030399	1007	0.979307	0.0450907	RAD54L	FALSE	chr1	46247694	+	NA
7895449	0.0304053	1008	0.979307	0.178898	NA	FALSE	NA	NA	NA	NA
7974621	0.0304687	1009	0.979307	0.0434766	ARID4A	FALSE	chr14	58298384	+	NA
7997832	0.0304745	1010	0.979307	0.055627	LOC339059	FALSE	NA	NA	NA	NA
8072529	0.0304911	1011	0.979307	0.0317801	DEPDC5	FALSE	chr22	31754068	+	NA
7977117	0.0305022	1012	0.979307	-0.0602064	RNU7-160P	FALSE	chr14	103550344	+	NA
8014664	0.0305476	1013	0.979307	-0.107479	NA	FALSE	NA	NA	NA	NA
8019649	0.0305476	1014	0.979307	-0.107479	NA	FALSE	NA	NA	NA	NA
7964976	0.0305589	1015	0.979307	0.0405106	TRHDE-AS1	FALSE	chr12	72258240; 72272526; 72271991; 72274907	-	NA
7993112	0.0305726	1016	0.979307	-0.0711501	RNU6-457P	FALSE	chr16	6873898	+	NA
8083075	0.030594	1017	0.979307	0.07659	PXYLP1	FALSE	chr3	141231827	+	NA
7959087	0.0305962	1018	0.979307	0.045036	SRRM4	FALSE	chr12	118981494	+	NA
7971124	0.0306144	1019	0.979307	0.0898214	UFM1	FALSE	chr13	38349848; 38349850; 38349880; 38349885; 38349995	+	NA
8047692	0.030647	1020	0.979307	-0.064688	CTLA4	FALSE	chr2	203867942	+	NA
7896306	0.0307222	1021	0.979307	-0.151485	NA	FALSE	NA	NA	NA	NA
8062433	0.0307344	1022	0.979307	0.0404671	RPRD1B	FALSE	chr20	38033545	+	NA
8151092	0.0307369	1023	0.979307	0.0449972	CRH	FALSE	chr8	66178725	-	NA
7893392	0.030777	1024	0.979307	0.112611	NA	FALSE	NA	NA	NA	NA
8179504	0.0308546	1025	0.979307	-0.0307352	BRD2	FALSE	chr6	32970887	+	NA
7901856	0.0308645	1026	0.979307	-0.0476013	LAMTOR5P1	FALSE	NA	NA	NA	NA
8160452	0.0308907	1027	0.979307	0.0619961	CDKN2B	FALSE	chr9	22009363	-	NA
8163149	0.0309053	1028	0.979307	-0.0430173	PTPN3	FALSE	chr9	109378980; 109397770; 109451384; 109451384; 109498306; 109498313	-	NA
8162039	0.0309072	1029	0.979307	0.0482763	C9orf64	FALSE	chr9	83956717	-	NA
7933976	0.030958	1030	0.979307	-0.049765	RN7SL220P	FALSE	chr10	68008017	-	NA
7895007	0.0309827	1031	0.979307	-0.0645627	NA	FALSE	NA	NA	NA	NA
8162927	0.0310088	1032	0.979307	-0.0497503	NA	FALSE	NA	NA	NA	NA
7943530	0.0310781	1033	0.979307	-0.0529566	GRIA4	FALSE	chr11	105610072	+	NA
8026513	0.0311318	1034	0.979307	0.0403695	TPM4	FALSE	chr19	16067506	+	rs1870071
8074845	0.031135	1035	0.979307	-0.0582947	ZNF280B	FALSE	chr22	22509154	-	NA
8126312	0.031149	1036	0.979307	-0.0356442	TFEB	FALSE	chr6	41735527	-	NA
7925364	0.031183	1037	0.979307	0.040391	HEATR1	FALSE	chr1	236604504	-	NA
7895351	0.0312313	1038	0.979307	0.131258	NA	FALSE	NA	NA	NA	NA
8033605	0.0313068	1039	0.979307	-0.025631	MYO1F	FALSE	chr19	8577577	-	NA
8066444	0.0313519	1040	0.979307	0.0558248	LINC01260	FALSE	chr20	44663498; 44696096	-	NA
8015685	0.0313777	1041	0.979307	0.0383507	EZH1	FALSE	chr17	42745030	-	rs2293152; rs4796791; rs744166; rs9891119
8117334	0.0313798	1042	0.979307	-0.0582128	HIST1H4A	FALSE	chr6	26021678	+	NA
8047557	0.0313889	1043	0.979307	-0.0598989	NA	FALSE	NA	NA	NA	NA
7892544	0.0313926	1044	0.979307	-0.100863	NA	FALSE	NA	NA	NA	NA
8072636	0.0314609	1045	0.979307	0.0447999	ISX	FALSE	chr22	35066135; 35066135	+	NA
7962559	0.0314893	1046	0.979307	-0.0523867	SLC38A4	FALSE	chr12	46825997	-	NA
8043552	0.0314905	1047	0.979307	-0.0474292	KCNIP3	FALSE	chr2	95346727	+	NA
8175193	0.0315106	1048	0.979307	0.167265	RNU6-98P	FALSE	NA	NA	NA	NA
8084947	0.0315584	1049	0.979307	0.0552597	FBXO45	FALSE	chr3	196568687	+	NA
8047467	0.0316615	1050	0.979307	-0.0495637	CDK15	FALSE	chr2	201806620	+	NA
7895037	0.0316696	1051	0.979307	-0.124578	NA	FALSE	NA	NA	NA	NA
7895885	0.031677	1052	0.979307	0.0447418	NA	FALSE	NA	NA	NA	NA
8027247	0.0316985	1053	0.979307	0.0760712	ZNF93	FALSE	chr19	19901060	+	NA
8169365	0.0317124	1054	0.979307	0.0382738	TMEM164	FALSE	NA	NA	NA	NA
7901229	0.031727	1055	0.979307	-0.056432	FAAH	FALSE	chr1	46394264	+	NA
8122703	0.0317271	1056	0.979307	-0.115711	NA	FALSE	NA	NA	NA	NA
8038707	0.0317474	1057	0.979307	-0.0428084	KLK8	FALSE	chr19	51001702	-	NA
7962246	0.0317761	1058	0.979307	-0.0527449	NA	FALSE	NA	NA	NA	NA
7965675	0.0318031	1059	0.979307	-0.100633	NA	FALSE	NA	NA	NA	NA
7983985	0.031827	1060	0.979307	0.0480087	LDHAL6B	FALSE	chr15	59206822	+	NA
7965478	0.0318408	1061	0.979307	-0.0818471	NA	FALSE	NA	NA	NA	NA
7919604	0.0319408	1062	0.979307	0.063503	FCGR1B	FALSE	chr1	121087344; 121087344; 121087344; 121087351; 121087357; 121087361; 121087386; 121087394; 121087412; 121094904	+	NA
8133095	0.0320079	1063	0.979307	-0.0412951	INTS4	FALSE	chr11	77994678	-	NA
7997245	0.0320352	1064	0.979307	0.0551016	RNU6-237P	FALSE	chr16	74456540	+	NA
7892966	0.0320408	1065	0.979307	0.0446447	NA	FALSE	NA	NA	NA	NA
7902660	0.0320437	1066	0.979307	0.052029	WDR63	FALSE	chr1	85062311	+	rs11587876; rs12087340
8157014	0.0320516	1067	0.979307	-0.0610364	OR13C8	FALSE	chr9	104569167	+	NA
7943736	0.0320729	1068	0.979307	-0.0714984	MIR34B	FALSE	chr11	111512930	+	NA
7895487	0.0320818	1069	0.979307	-0.15037	NA	FALSE	NA	NA	NA	NA
8047765	0.0322364	1070	0.979307	-0.0521646	RN7SKP178	FALSE	chr2	205900629	+	NA
8045208	0.032238	1071	0.979307	-0.03049	POTEE	FALSE	chr2	131218066	+	NA
7893865	0.0322996	1072	0.979307	0.151356	NA	FALSE	NA	NA	NA	NA
7901110	0.0323066	1073	0.979307	-0.0304781	AKR1A1	TRUE	chr1	45550542; 45550782; 45550803; 45550845; 45550853; 45551066; 45551066; 45551067; 45566868; 45567548; 45567981; 45568146; 45568613; 45569049	+	NA
7896203	0.0323069	1074	0.979307	-0.106431	NA	FALSE	NA	NA	NA	NA
8100131	0.0323091	1075	0.979307	-0.0579068	GABRA4	FALSE	chr4	46994407; 46993505; 46993505; 46993540; 46993548	-	NA
8068266	0.0323537	1076	0.979307	0.0366972	IFNAR1	FALSE	chr21	33324903	+	NA
8111443	0.032393	1077	0.979307	0.076856	C1QTNF3	FALSE	chr5	34043213	-	NA
7979864	0.032412	1078	0.979307	-0.0323363	ERH	TRUE	chr14	69398627	-	NA
8175153	0.0324187	1079	0.979307	-0.0640391	RNA5SP514	FALSE	NA	NA	NA	NA
7893209	0.0324331	1080	0.979307	-0.064034	NA	FALSE	NA	NA	NA	NA
8086024	0.0325664	1081	0.979307	-0.0561654	YPLR6490	FALSE	NA	NA	NA	NA
8089060	0.0326033	1082	0.979307	-0.0578114	GABRR3	FALSE	chr3	98035304	-	NA
8148325	0.0326151	1083	0.979307	-0.0712828	RNU1-106P	FALSE	chr8	127999130	+	rs2019960; rs4410871; rs759648
8011396	0.0326215	1084	0.979307	-0.0384734	SHPK	FALSE	chr17	3636322	-	NA
8085112	0.0326275	1085	0.979307	-0.0703269	NA	FALSE	NA	NA	NA	NA
8072122	0.0326378	1086	0.979307	0.036636	HMGB1P10	FALSE	NA	NA	NA	NA
7923516	0.032639	1087	0.979307	0.0400087	CYB5R1	FALSE	chr1	202967280	-	NA
8138930	0.0326442	1088	0.979307	-0.0608341	RP9P	FALSE	NA	NA	NA	NA
8180389	0.032648	1089	0.979307	-0.0471186	NA	FALSE	NA	NA	NA	NA
8172787	0.0326594	1090	0.979307	-0.0384652	SSX2B	FALSE	NA	NA	NA	NA
8165107	0.0327128	1091	0.979307	0.0366199	CARD9	FALSE	chr9	136373681	-	NA
7985981	0.0327225	1092	0.979307	0.0613154	TTLL13	FALSE	NA	NA	NA	NA
8168163	0.0327957	1093	0.979307	-0.049247	GDPD2	FALSE	NA	NA	NA	NA
8104461	0.032806	1094	0.979307	-0.0712076	NA	FALSE	NA	NA	NA	NA
8011245	0.0328526	1095	0.979307	0.0399588	TSR1	FALSE	chr17	2337507	-	NA
8014700	0.0328595	1096	0.979307	0.0548331	C17orf96	FALSE	chr17	38675421	-	NA
7932094	0.0329222	1097	0.979307	-0.0813585	PHYH	FALSE	chr10	13299763	-	NA
8041745	0.0329759	1098	0.979307	0.0552866	CAMKMT	FALSE	chr2	44369710; 44372741; 44362104; 44361963; 44361949; 44372747; 44361955; 44676593; 44704284; 44361963	+	NA
7979888	0.03301	1099	0.979307	-0.0470233	SLC8A3	FALSE	chr14	70080206	-	NA
8110216	0.033035	1100	0.979307	0.0885045	NA	FALSE	NA	NA	NA	NA
7892832	0.0330515	1101	0.979307	-0.0593415	NA	FALSE	NA	NA	NA	NA
8057574	0.0330529	1102	0.979307	0.0884951	RN7SKP42	FALSE	chr2	187122861	-	NA
8180361	0.0330713	1103	0.979307	0.054765	NA	FALSE	NA	NA	NA	NA
8022606	0.0331015	1104	0.979307	-0.0948529	RNA5SP452	FALSE	chr18	24170623	-	NA
8029413	0.033102	1105	0.979307	0.0449647	ZNF227	FALSE	chr19	44207546; 44212527; 44212527; 44212537; 44212537; 44212537; 44212537; 44212564; 44212567; 44212570; 44212574; 44212622; 44227124	+	NA
8180384	0.0331619	1106	0.979307	0.0398869	NA	FALSE	NA	NA	NA	NA
7922389	0.0331793	1107	0.979307	-0.0592997	NA	FALSE	NA	NA	NA	NA
7956747	0.0331799	1108	0.979307	-0.0812441	LDHAL6CP	FALSE	NA	NA	NA	NA
7998784	0.0332388	1109	0.979307	0.0492779	ABCA3	FALSE	chr16	2340735	-	NA
8095539	0.0332537	1110	0.979307	0.0449251	UTP3	FALSE	chr4	70688478	+	NA
7941639	0.0333017	1111	0.979307	0.0398546	BBS1	FALSE	chr11	66510608	+	NA
8075198	0.0333086	1112	0.979307	-0.0748112	RNU6-1219P	FALSE	chr22	29191808	-	NA
7969675	0.033348	1113	0.979307	-0.0754498	NA	FALSE	NA	NA	NA	NA
8048772	0.0333918	1114	0.979307	-0.0321586	RHBDD1	FALSE	chr2	226835954	+	NA
7927723	0.0334344	1115	0.979307	0.050267	C10orf107	FALSE	chr10	61662960	+	NA
8016787	0.0334421	1116	0.979307	-0.0811284	NA	FALSE	NA	NA	NA	NA
8064188	0.0334668	1117	0.979307	-0.0429429	NA	FALSE	NA	NA	NA	NA
8178090	0.0334828	1118	0.979307	0.0427033	C6orf48	FALSE	chr6	31834607; 31834626; 31834907; 31834907; 31834907; 31834917; 31834921; 31834931; 31835287; 31836842	+	NA
8179326	0.0334828	1119	0.979307	0.0427033	C6orf48	FALSE	chr6	31834607; 31834626; 31834907; 31834907; 31834907; 31834917; 31834921; 31834931; 31835287; 31836842	+	NA
8091885	0.0334859	1120	0.979307	-0.0468995	RN7SKP298	FALSE	chr3	166670122	-	NA
7915841	0.0334963	1121	0.979307	-0.0382857	KNCN	FALSE	chr1	46551215	-	NA
7896983	0.0335145	1122	0.979307	-0.0423849	SSU72	FALSE	chr1	1574869; 1546487; 1574587; 1574584	-	NA
7902623	0.0335247	1123	0.979307	0.059174	DNASE2B	FALSE	chr1	84398531	+	NA
7904394	0.0335469	1124	0.979307	-0.0810824	NA	FALSE	NA	NA	NA	NA
7919038	0.0335539	1125	0.979307	0.0546113	WARS2	FALSE	chr1	119140671	-	NA
8135218	0.0335708	1126	0.979307	0.0591582	LRRC17	FALSE	chr7	102912990	+	NA
7992843	0.0335807	1127	0.979307	-0.0517757	RNU1-22P	FALSE	chr16	3086142	+	NA
7893271	0.0336148	1128	0.979307	-0.0468662	NA	FALSE	NA	NA	NA	NA
7983953	0.0336151	1129	0.979307	0.0364291	RNF111	FALSE	chr15	58987951	+	NA
7930870	0.0336215	1130	0.979307	0.0442336	TOMM22	FALSE	chr22	38681947	+	NA
7936596	0.0336453	1131	0.979307	0.0267128	CACUL1	FALSE	chr10	118755246	-	NA
8097066	0.0337087	1132	0.979307	0.0397613	METTL14	FALSE	chr4	118685367	+	NA
7905490	0.0337183	1133	0.979307	-0.0517367	LCE3C	FALSE	chr1	152600661	+	NA
8030677	0.033764	1134	0.979307	-0.0517237	MYBPC2	FALSE	chr19	50432902	+	NA
8129418	0.0337818	1135	0.979307	0.0491233	PTPRK	FALSE	chr6	128520583	-	NA
7984538	0.033798	1136	0.979307	-0.0489747	RNA5SP398	FALSE	chr15	69367584	+	NA
7895109	0.0338316	1137	0.979307	-0.148992	NA	FALSE	NA	NA	NA	NA
8090664	0.0338447	1138	0.979307	0.0651478	ASTE1	FALSE	chr3	131026792	-	NA
8072272	0.0338533	1139	0.979307	-0.0468049	NA	FALSE	NA	NA	NA	NA
8152701	0.0338636	1140	0.979307	-0.0667864	NA	FALSE	NA	NA	NA	NA
8179638	0.0338646	1141	0.979307	-0.0351003	TRIM26	FALSE	chr6	30213427	-	NA
7937073	0.0338871	1142	0.979307	-0.0422981	LINC01164	FALSE	chr10	131790199	-	NA
7957186	0.0338941	1143	0.979307	0.036371	TBC1D15	FALSE	chr12	71839758	+	NA
8036923	0.0339202	1144	0.979307	0.026671	NUMBL	FALSE	chr19	40690553	-	NA
8018935	0.0339869	1145	0.979307	-0.0808905	RNU6-638P	FALSE	chr17	78696797	-	NA
8155250	0.0339995	1146	0.979307	-0.063485	GRHPR	FALSE	chr9	37422665	+	NA
8073662	0.0340759	1147	0.979307	-0.0422544	PARVB	FALSE	chr22	43999210	+	NA
7919160	0.0341096	1148	0.979307	-0.114238	RNVU1-4	FALSE	chr1	120942599	+	NA
7919166	0.0341096	1149	0.979307	-0.114238	RNVU1-4	FALSE	chr1	120942599	+	NA
7973867	0.0341193	1150	0.979307	0.140193	NA	FALSE	NA	NA	NA	NA
8030831	0.0341467	1151	0.979307	0.0879277	ZNF175	FALSE	chr19	51571297	+	NA
8165690	0.034228	1152	0.979307	0.0258625	CYTB	FALSE	NA	NA	NA	NA
8041149	0.0342548	1153	0.979307	0.0396376	WDR43	FALSE	chr2	28894642	+	NA
7895919	0.0343317	1154	0.979307	0.104034	NA	FALSE	NA	NA	NA	NA
7961298	0.034342	1155	0.979307	-0.0572625	TAS2R42	FALSE	chr12	11186937	-	NA
7941457	0.0343602	1156	0.979307	0.0362748	CCDC85B	FALSE	chr11	65890111	+	NA
8111331	0.0343633	1157	0.979307	0.0266043	GOLPH3	FALSE	chr5	32174350	-	NA
8028227	0.0343784	1158	0.979307	0.0472998	ZNF383	FALSE	chr19	37226463	+	NA
8074606	0.0343904	1159	0.979307	0.139967	USP18	FALSE	chr22	18149898	+	NA
7892864	0.0344335	1160	0.979307	-0.1411	NA	FALSE	NA	NA	NA	NA
8048350	0.0344405	1161	0.979307	-0.0519716	PLCD4	FALSE	chr2	218609241; 218607898; 218607898; 218607898; 218629353; 218607918; 218630645; 218633638; 218607854; 218607915; 218635854; 218609739; 218607764; 218607918; 218622361	+	NA
8144405	0.034454	1162	0.979307	-0.0602348	DEFB107A	FALSE	chr8	7815716	-	NA
8149230	0.034454	1163	0.979307	-0.0602348	DEFB107A	FALSE	chr8	7815716	-	NA
8118322	0.0344666	1164	0.979307	0.0810769	SNORD52	FALSE	chr6	31837075	+	NA
7893503	0.0344792	1165	0.979307	-0.0743405	NA	FALSE	NA	NA	NA	NA
7925201	0.0345439	1166	0.979307	0.0395728	ARID4B	FALSE	chr1	235327487	-	NA
7952488	0.0345894	1167	0.979307	0.08026	NA	FALSE	NA	NA	NA	NA
7963758	0.0345949	1168	0.979307	-0.0695788	RN7SL390P	FALSE	chr12	54255910	-	NA
8086797	0.0345959	1169	0.979307	-0.0695784	RN7SL870P	FALSE	chr3	47560524	-	NA
8146859	0.034631	1170	0.979307	-0.113928	NA	FALSE	NA	NA	NA	NA
8098740	0.0346492	1171	0.979307	0.0265617	DUX4	FALSE	chr4	190173773	+	NA
8150276	0.0346678	1172	0.979307	-0.0406898	PPAPDC1B	FALSE	chr8	38269220	-	NA
8081462	0.0346774	1173	0.979307	-0.0571593	CCDC54	FALSE	chr3	107377193	+	NA
8075430	0.0346826	1174	0.979307	0.043967	MORC2	FALSE	chr22	30968201	-	NA
8022814	0.0346833	1175	0.979307	0.0257965	HNRNPA1	FALSE	chr12	54280192	+	NA
7924756	0.0346928	1176	0.979307	-0.0588141	NA	FALSE	NA	NA	NA	NA
8008817	0.0347235	1177	0.979307	-0.113873	NA	FALSE	NA	NA	NA	NA
7895152	0.0347241	1178	0.979307	-0.12257	NA	FALSE	NA	NA	NA	NA
7960846	0.034725	1179	0.979307	-0.066478	NA	FALSE	NA	NA	NA	NA
7955348	0.0347294	1180	0.979307	-0.0421046	GPD1	FALSE	chr12	50104007	+	NA
7895467	0.03474	1181	0.979307	-0.12256	NA	FALSE	NA	NA	NA	NA
7955613	0.0347732	1182	0.979307	0.0445366	KRT7	FALSE	chr12	52233113	+	NA
8113641	0.0347935	1183	0.979307	-0.0465666	CDO1	FALSE	chr5	115816954	-	NA
7997542	0.0348516	1184	0.980112	0.048825	NECAB2	FALSE	chr16	83968631	+	NA
7901858	0.0349121	1185	0.980639	0.0541889	RN7SL180P	FALSE	chr1	62072447	+	NA
8179258	0.0349305	1186	0.980639	0.0586992	LTA	FALSE	chr6	31572282	+	NA
7918188	0.0349586	1187	0.980639	-0.040626	SLC25A24	FALSE	chr1	108192818	-	NA
8114158	0.0351459	1188	0.983878	0.0309304	PPP2CA	FALSE	chr5	134226142	-	rs756699
7996908	0.0351609	1189	0.983878	0.0545977	SNTB2	FALSE	chr16	69187128	+	NA
8159086	0.0351628	1190	0.983878	0.0394357	ADAMTSL2	TRUE	chr9	133532163	+	NA
8005557	0.0352852	1191	0.984537	-0.0513012	EPN2	FALSE	chr17	19237395	+	NA
8149849	0.0353256	1192	0.984537	0.0510523	GNRH1	FALSE	chr8	25424654	-	NA
8151207	0.0353443	1193	0.984537	-0.0803113	NA	FALSE	NA	NA	NA	NA
8085429	0.035352	1194	0.984537	-0.0464277	LOC100128644	FALSE	NA	NA	NA	NA
7981183	0.0353562	1195	0.984537	-0.0536122	TCL1A	FALSE	chr14	95714196	-	NA
7904572	0.0354175	1196	0.984537	-0.167788	RNU1-59P	FALSE	chr1	149162944	-	NA
7936115	0.0354504	1197	0.984537	-0.0569247	SH3PXD2A	FALSE	chr10	103855406	-	NA
8154934	0.035451	1198	0.984537	0.0437782	IL11RA	FALSE	chr9	34652191	+	NA
7960544	0.0355062	1199	0.984537	-0.048526	VAMP1	TRUE	chr12	6470677	-	rs12296430; rs1800693
7894231	0.0355084	1200	0.984537	-0.122078	NA	FALSE	NA	NA	NA	NA
8123336	0.0355116	1201	0.984537	-0.066202	NA	FALSE	NA	NA	NA	NA
8174361	0.0355877	1202	0.985827	0.0621747	TSC22D3	FALSE	NA	NA	NA	NA
8125731	0.0356997	1203	0.985938	-0.0418867	ZBTB22	FALSE	chr6	33317942	-	NA
8110520	0.0357074	1204	0.985938	-0.0701074	HMGB3P22	FALSE	NA	NA	NA	NA
8164396	0.0357306	1205	0.985938	-0.0476544	MIR199B	FALSE	chr9	128244830	-	NA
7892682	0.0357659	1206	0.985938	-0.205719	NA	FALSE	NA	NA	NA	NA
8132034	0.0358518	1207	0.985938	-0.0800995	NA	FALSE	NA	NA	NA	NA
8155200	0.0358529	1208	0.985938	-0.0744514	CCIN	FALSE	chr9	36169393	+	NA
7997861	0.0358816	1209	0.985938	0.0635814	NA	FALSE	NA	NA	NA	NA
7894724	0.0359008	1210	0.985938	-0.147437	NA	FALSE	NA	NA	NA	NA
7894543	0.0359017	1211	0.985938	-0.113186	NA	FALSE	NA	NA	NA	NA
8117470	0.0359614	1212	0.985938	-0.0515525	BTN2A3P	FALSE	NA	NA	NA	NA
7892680	0.0359727	1213	0.985938	-0.0628229	NA	FALSE	NA	NA	NA	NA
7892998	0.0359867	1214	0.985938	0.12757	NA	FALSE	NA	NA	NA	NA
7951163	0.0360015	1215	0.985938	-0.0584084	RN7SL222P	FALSE	chr11	100642273	-	NA
8069085	0.0360497	1216	0.985938	0.0485001	TRPM2	FALSE	chr21	44353255	+	NA
7892959	0.0360909	1217	0.985938	0.138587	NA	FALSE	NA	NA	NA	NA
7970448	0.0361127	1218	0.985938	-0.0510777	GJB6	FALSE	chr13	20232395	-	NA
7893946	0.0361135	1219	0.985938	-0.0462412	NA	FALSE	NA	NA	NA	NA
7918149	0.0361768	1220	0.985938	-0.0567081	NA	FALSE	NA	NA	NA	NA
8145317	0.0361862	1221	0.985938	0.127425	ADAMDEC1	FALSE	chr8	24384504; 24405291; 24384284; 24384469	+	NA
8018095	0.0362139	1222	0.985938	-0.116155	NA	FALSE	NA	NA	NA	NA
8032057	0.0362352	1223	0.985938	-0.0346549	POLRMT	FALSE	chr19	633604	-	NA
7982333	0.0363005	1224	0.985938	0.0484333	LOC100499221	FALSE	NA	NA	NA	NA
8089407	0.0363014	1225	0.985938	-0.0494008	MORC1	FALSE	chr3	109118142	-	NA
8113358	0.0364065	1226	0.985938	0.0435483	ST8SIA4	FALSE	chr5	100903266	-	NA
7913547	0.0364254	1227	0.985938	0.0435438	WNT4	FALSE	chr1	22142966	-	NA
7967060	0.0364558	1228	0.985938	-0.0376803	SRSF9	FALSE	chr12	120469793	-	NA
7894746	0.036474	1229	0.985938	-0.147019	NA	FALSE	NA	NA	NA	NA
7893651	0.0364826	1230	0.985938	0.0867672	NA	FALSE	NA	NA	NA	NA
8091910	0.0365188	1231	0.985938	-0.0698132	SERPINI2	FALSE	chr3	167474132	-	NA
7895051	0.0365518	1232	0.985938	-0.146962	NA	FALSE	NA	NA	NA	NA
7967794	0.0365544	1233	0.985938	-0.0376608	ANKLE2	FALSE	chr12	132761888	-	NA
7951896	0.0365807	1234	0.985938	-0.0345921	PCSK7	FALSE	chr11	117232525	-	NA
7960259	0.0365866	1235	0.985938	-0.07417	NA	FALSE	NA	NA	NA	NA
7957431	0.0366054	1236	0.985938	-0.104058	RNU6-977P	FALSE	chr12	83021889	+	NA
8166398	0.0366387	1237	0.985938	0.0434932	YY2	FALSE	NA	NA	NA	NA
7956894	0.0366627	1238	0.985938	0.108746	HELB	FALSE	chr12	66302544	+	NA
7895143	0.0366975	1239	0.985938	-0.0797521	NA	FALSE	NA	NA	NA	NA
8064336	0.0367573	1240	0.985938	-0.0358592	TBC1D20	FALSE	chr20	462553	-	NA
8002667	0.0367746	1241	0.985938	-0.050902	PMFBP1	FALSE	chr16	72171271	-	NA
8090469	0.0367761	1242	0.985938	-0.0416506	GATA2	FALSE	chr3	128488530	-	NA
7922414	0.0368379	1243	0.986014	-0.112654	SNORD76	FALSE	NA	NA	NA	NA
8078227	0.0368382	1244	0.986014	-0.0345456	KAT2B	FALSE	chr3	20040022	+	NA
8120004	0.0369069	1245	0.986641	0.0535934	TMEM151B	FALSE	chr6	44270742	+	NA
8038725	0.0369209	1246	0.986641	0.0371601	KLK10	FALSE	chr19	51020175	-	NA
7897322	0.0370196	1247	0.986659	-0.0375697	PHF13	FALSE	chr1	6613684	+	rs3007421
8031913	0.0370962	1248	0.986659	-0.0248264	TRIM28	TRUE	chr19	58544468	+	NA
8014033	0.0371219	1249	0.986659	-0.069598	NA	FALSE	NA	NA	NA	NA
8037259	0.0371852	1250	0.986659	-0.0739439	PSG11	FALSE	chr19	43026466; 43026512; 43025352; 43010706; 43026469; 43015274; 43026462; 43026462; 43026448; 43019047; 43024844; 43026474; 43026454	-	NA
8058373	0.0371861	1251	0.986659	0.0482005	WDR12	FALSE	chr2	202912226	-	NA
8180336	0.0371906	1252	0.986659	-0.0512246	NA	FALSE	NA	NA	NA	NA
7940790	0.0372297	1253	0.986659	-0.0459737	C11orf84	FALSE	chr11	63813387; 63818594; 63818946	+	NA
8062023	0.0373271	1254	0.986659	0.0390046	MAP1LC3A	FALSE	chr20	34558717	+	NA
8046373	0.03735	1255	0.986659	-0.0415272	DLX1	FALSE	chr2	172085535	+	NA
8045835	0.0373812	1256	0.986659	-0.0480541	GALNT5	FALSE	chr2	157257597	+	NA
8050608	0.0373898	1257	0.986659	0.0630571	C2orf43	FALSE	NA	NA	NA	NA
7999476	0.0373922	1258	0.986659	-0.204138	NA	FALSE	NA	NA	NA	NA
8006768	0.0374405	1259	0.986659	0.0305467	SOCS7	FALSE	chr17	38352244	+	NA
7898675	0.0374665	1260	0.986659	0.0862976	NA	FALSE	NA	NA	NA	NA
8166065	0.0374695	1261	0.986659	0.048127	TLR8	FALSE	NA	NA	NA	NA
7904082	0.0375264	1262	0.986659	-0.0507057	NUTF2P4	FALSE	NA	NA	NA	NA
8090662	0.0375608	1263	0.986659	-0.0794043	NA	FALSE	NA	NA	NA	NA
8047286	0.0376181	1264	0.986659	-0.0793815	NA	FALSE	NA	NA	NA	NA
8046160	0.0376571	1265	0.986659	0.0515871	KLHL41	FALSE	chr2	169509701	+	NA
7937946	0.0377417	1266	0.986659	-0.0622549	OR52I2	FALSE	chr11	4586790	+	NA
7931268	0.0377487	1267	0.986659	0.0388841	BCCIP	FALSE	chr10	125823545	+	NA
8021540	0.0377995	1268	0.986659	-0.0562371	NA	FALSE	NA	NA	NA	NA
7989611	0.0378591	1269	0.986659	-0.041419	FAM96A	FALSE	chr15	64093808	-	NA
7895239	0.0378869	1270	0.986659	-0.0545991	NA	FALSE	NA	NA	NA	NA
8085340	0.0378915	1271	0.986659	0.0388546	VGLL4	FALSE	chr3	11643924	-	NA
8067011	0.0379117	1272	0.986659	0.0324094	ADNP	FALSE	chr20	50930990	-	NA
8150036	0.0379298	1273	0.986659	-0.0458094	KIF13B	FALSE	chr8	29263073	-	NA
7893801	0.0379608	1274	0.986659	-0.138646	NA	FALSE	NA	NA	NA	NA
8000205	0.0379728	1275	0.986659	0.0515001	NPIPB5	FALSE	chr16	22513522	+	NA
8005957	0.0379924	1276	0.986659	0.101908	SNORD4B	FALSE	chr17	28723681	+	NA
8139131	0.0380077	1277	0.986659	0.0532766	AMPH	FALSE	chr7	38631567	-	NA
8103894	0.0380104	1278	0.986659	0.0532758	ENPP6	FALSE	chr4	184217961	-	NA
8003087	0.0380365	1279	0.986659	-0.068352	RNA5SP432	FALSE	chr16	84040033	-	NA
8055445	0.0380552	1280	0.986659	0.0388536	DARS	FALSE	chr2	135911617; 135912559; 135914866; 135920553; 135980551; 135983447; 135985563; 135985684; 135985884; 135985897; 135986100	-	NA
7957536	0.038075	1281	0.986659	-0.0683388	NUDT4	FALSE	chr12	93377882	+	NA
8069770	0.0380812	1282	0.986659	-0.044295	GRIK1	FALSE	chr21	29939912	-	NA
7932508	0.0381017	1283	0.986659	-0.0791898	RNU6-306P	FALSE	chr10	21564577	-	NA
8130116	0.0381077	1284	0.986659	0.0297784	LATS1	FALSE	chr6	149718105	-	NA
8009351	0.038113	1285	0.986659	-0.0973728	NA	FALSE	chr17	67271468	+	NA
7894396	0.0381139	1286	0.986659	-0.120506	NA	FALSE	NA	NA	NA	NA
8063209	0.038156	1287	0.986659	0.0613083	LOC100131496	FALSE	NA	NA	NA	NA
7969569	0.0382073	1288	0.986659	0.0416043	SLITRK5	FALSE	chr13	87672614	+	NA
8076547	0.0382271	1289	0.986659	-0.0442622	TTLL1	FALSE	chr22	43089428	-	NA
8066264	0.0382394	1290	0.986659	-0.0620991	NA	FALSE	NA	NA	NA	NA
8153828	0.038255	1291	0.986659	-0.0373322	FOXH1	FALSE	chr8	144476335	-	NA
8180363	0.0383218	1292	0.986886	-0.0457185	NA	FALSE	NA	NA	NA	NA
7982090	0.0383366	1293	0.986886	0.0502229	SNORD115-6	FALSE	chr15	25180496	+	NA
7975361	0.0383845	1294	0.986886	0.0297352	KIAA0247	FALSE	NA	NA	NA	NA
8040430	0.0383866	1295	0.986886	0.0594016	VSNL1	FALSE	chr2	17540652	+	NA
8013521	0.0384986	1296	0.986886	-0.111736	NA	FALSE	NA	NA	NA	NA
8121927	0.0385066	1297	0.986886	0.0430608	RNF146	FALSE	chr6	127266609; 127266681; 127266725; 127266737; 127266839; 127266848; 127266850; 127266863; 127266871; 127266882; 127266882; 127266882; 127266882; 127266882; 127266887	+	NA
7892521	0.0385586	1298	0.986886	0.0742258	NA	FALSE	NA	NA	NA	NA
7932678	0.038592	1299	0.986886	0.0297029	YME1L1	FALSE	chr10	27154420	-	NA
8086139	0.0386305	1300	0.986886	0.0857557	RNU6ATAC4P	FALSE	chr3	36968316	-	NA
7945228	0.0386376	1301	0.986886	-0.06907	FLJ34521	FALSE	NA	NA	NA	NA
8034334	0.0386755	1302	0.986886	0.0593106	ZNF20	FALSE	chr19	12140341; 12136874; 12140407; 12140315; 12140326; 12137702; 12140355; 12140355	-	NA
8156573	0.0386972	1303	0.986886	0.0634218	MIR24-1	FALSE	NA	NA	NA	NA
8022424	0.0387079	1304	0.986886	-0.0681236	NF1P3	FALSE	NA	NA	NA	NA
8067862	0.0387079	1305	0.986886	-0.0681236	NF1P3	FALSE	NA	NA	NA	NA
8001656	0.0387084	1306	0.986886	-0.0681235	NA	FALSE	NA	NA	NA	NA
7946115	0.0387602	1307	0.987254	-0.0575923	OR52L1	FALSE	chr11	5986985	-	NA
8025237	0.0387821	1308	0.987254	-0.0412259	CAMSAP3	FALSE	chr19	7595901	+	NA
8002713	0.0388733	1309	0.987283	-0.0354727	CLEC18B	FALSE	chr16	74421392	-	NA
8108256	0.0388875	1310	0.987283	-0.0487528	MYOT	FALSE	chr5	137867857	+	NA
8040415	0.0388971	1311	0.987283	-0.0412021	NA	FALSE	NA	NA	NA	NA
7971537	0.0389207	1312	0.987283	-0.0726684	NA	FALSE	NA	NA	NA	NA
8050761	0.0389315	1313	0.987283	0.0625397	RNA5SP88	FALSE	chr2	24564738	-	rs4665719
7896524	0.0389699	1314	0.987505	0.145596	NA	FALSE	NA	NA	NA	NA
7915594	0.0390385	1315	0.988074	-0.0397755	RPS15AP11	FALSE	NA	NA	NA	NA
7985402	0.0391489	1316	0.988074	0.0429163	UBE2Q2P2	FALSE	NA	NA	NA	NA
8023078	0.0391926	1317	0.988074	-0.0787647	RNU6-1278P	FALSE	chr18	46121721	-	NA
7986520	0.039285	1318	0.988074	-0.0787292	LOC101927628	FALSE	NA	NA	NA	NA
7960666	0.0392925	1319	0.988074	0.0251667	ZNF384	TRUE	chr12	6689510	-	rs12296430; rs1800693
7894821	0.0393096	1320	0.988074	0.114431	NA	FALSE	NA	NA	NA	NA
7984217	0.039336	1321	0.988074	-0.0454869	PLEKHO2	FALSE	chr15	64841882	+	NA
8056792	0.0393371	1322	0.988074	-0.111285	NA	FALSE	NA	NA	NA	NA
8166948	0.0393549	1323	0.988074	-0.0787023	NA	FALSE	NA	NA	NA	NA
7950370	0.0393615	1324	0.988074	-0.101891	RNA5SP343	FALSE	chr11	74198854	-	NA
8162940	0.0393637	1325	0.988074	0.125203	ABCA1	FALSE	chr9	104928237	-	NA
7965398	0.0393912	1326	0.988074	-0.058725	KERA	FALSE	chr12	91057983	-	NA
8001231	0.0394134	1327	0.988074	-0.10263	NA	FALSE	NA	NA	NA	NA
8133074	0.0394145	1328	0.988074	-0.0410958	INTS4	FALSE	chr11	77994678	-	NA
7897089	0.0394375	1329	0.988074	-0.0287235	PLCH2	FALSE	chr1	2479089	+	rs3748817; rs4648356
8172022	0.0395032	1330	0.988348	0.0599393	TMEM47	FALSE	NA	NA	NA	NA
8159531	0.0395329	1331	0.988348	0.0428308	LCNL1	FALSE	chr9	136983323	+	NA
7911383	0.0395543	1332	0.988348	-0.0353521	C1orf159	FALSE	chr1	1116081; 1092077; 1116095; 1116098; 1087636; 1116089; 1116089; 1084072; 1092174; 1106127; 1116095; 1116243; 1116356; 1092294; 1116361; 1092813; 1092813; 1116087; 1116089	-	NA
7952103	0.0395672	1333	0.988348	0.0352705	DDX6	FALSE	chr11	118790948	-	rs523604; rs533646
8142876	0.0396211	1334	0.988953	-0.0618962	NA	FALSE	NA	NA	NA	NA
7987869	0.0396969	1335	0.989375	-0.0340469	TMEM87A	FALSE	chr15	42273584	-	NA
7893056	0.0397441	1336	0.989375	-0.114167	NA	FALSE	NA	NA	NA	NA
8138765	0.0397517	1337	0.989375	-0.0463118	HOXA11	FALSE	chr7	27185216	-	rs706015
8006968	0.0397692	1338	0.989375	-0.047481	GSDMA	FALSE	chr17	39962972	+	rs12946510
8066637	0.0398683	1339	0.989375	-0.0453673	LOC643549	FALSE	NA	NA	NA	NA
7951593	0.039908	1340	0.989375	0.0598132	COLCA1	FALSE	chr11	111305045; 111299253; 111300232; 111299814; 111300009	-	NA
8068383	0.039914	1341	0.989375	-0.0501034	CLIC6	FALSE	chr21	34669388	+	NA
7964246	0.0399263	1342	0.989375	-0.0572619	SNORD59B	FALSE	NA	NA	NA	NA
7940377	0.0399824	1343	0.989375	-0.0286457	TMEM132A	FALSE	chr11	60924480	+	rs34383631; rs650258
8002421	0.0400123	1344	0.989375	-0.0395836	VAC14	FALSE	chr16	70801161	-	NA
8168968	0.0400185	1345	0.989375	-0.0556198	GPRASP1	FALSE	NA	NA	NA	NA
8075458	0.0400403	1346	0.989375	-0.0409689	NA	FALSE	NA	NA	NA	NA
7897527	0.0400455	1347	0.989375	0.029481	UBE4B	FALSE	chr1	10033595	+	rs10492972
7926385	0.0400731	1348	0.989375	0.0427118	STAM	FALSE	chr10	17644124	+	NA
7923976	0.040111	1349	0.989375	0.124703	MIR29B2	FALSE	chr1	207802523	-	NA
8118116	0.0401513	1350	0.989375	-0.0500452	MICB	FALSE	chr6	31494880	+	NA
8160504	0.040221	1351	0.989375	-0.0555649	LRRC19	FALSE	chr9	27005693	-	NA
7894463	0.040223	1352	0.989375	-0.110818	NA	FALSE	NA	NA	NA	NA
8059387	0.0402641	1353	0.989375	-0.0539585	FAM124B	FALSE	chr2	224402034	-	NA
7893832	0.0402913	1354	0.989375	-0.126301	NA	FALSE	NA	NA	NA	NA
7979131	0.0403167	1355	0.989375	-0.110769	GNG2	FALSE	chr14	51860640; 51847171; 51877633; 51913111; 51826199; 51826199; 51826194; 51861323; 51847233; 51847233; 51860641; 51860733; 51860645; 51860413; 51877591; 51847125	+	NA
8162570	0.0403444	1356	0.989375	-0.0504231	HSD17B3	FALSE	chr9	96302152	-	NA
8167878	0.0403644	1357	0.989375	-0.110744	NA	FALSE	NA	NA	NA	NA
7897378	0.0403691	1358	0.989375	0.0735229	PER3	FALSE	chr1	7784319; 7784428; 7784428; 7784653; 7784702; 7785522; 7787321; 7803050; 7836807	+	NA
8082120	0.0404025	1359	0.989375	-0.0483898	DIRC2	FALSE	chr3	122794794	+	NA
8088065	0.0404186	1360	0.989375	0.073504	SFMBT1	FALSE	chr3	53046068	-	NA
8143659	0.0404403	1361	0.989375	-0.068464	NA	FALSE	NA	NA	NA	NA
7945177	0.0405017	1362	0.990151	-0.0499598	LINC00167	FALSE	chr11	130002937	+	NA
8016452	0.0405535	1363	0.99069	0.0525731	HOXB4	FALSE	chr17	48580111	-	NA
7990528	0.0405935	1364	0.990921	0.0425985	SNUPN	FALSE	chr15	75625794; 75625815; 75625688; 75625693; 75605364; 75617524; 75626159; 75626469; 75625638; 75625179; 75625663	-	NA
8061562	0.0406452	1365	0.990921	-0.0554506	RNU6-384P	FALSE	chr20	31581088	+	NA
8174666	0.0407361	1366	0.990921	-0.0464629	NA	FALSE	NA	NA	NA	NA
7894556	0.0407642	1367	0.990921	-0.0590386	NA	FALSE	NA	NA	NA	NA
7922420	0.0407659	1368	0.990921	-0.0554183	SERPINC1	FALSE	chr1	173917378	-	NA
8177174	0.0408594	1369	0.990921	-0.0368819	NA	FALSE	NA	NA	NA	NA
8100338	0.0409381	1370	0.990921	-0.0482642	ERVMER34-1	FALSE	chr4	52751640	-	NA
7905949	0.0410095	1371	0.990921	0.0760884	HMGN2P18	FALSE	NA	NA	NA	NA
7956648	0.0410167	1372	0.990921	0.113402	XRCC6BP1	FALSE	chr12	57941540; 57941576; 57941795; 57949740	+	rs12368653; rs201202118; rs703842
8017840	0.0410497	1373	0.990921	-0.0553426	LRRC37A16P	FALSE	NA	NA	NA	NA
8036830	0.0410659	1374	0.990921	0.0472336	TTC9B	FALSE	chr19	40218399	-	NA
8050232	0.041189	1375	0.990921	0.0381986	CYS1	FALSE	chr2	10080411	-	NA
8078896	0.0411916	1376	0.990921	-0.0910667	NA	FALSE	NA	NA	NA	NA
7951701	0.0412077	1377	0.990921	-0.125765	NA	FALSE	NA	NA	NA	NA
7980702	0.0412584	1378	0.990921	0.0424554	NRDE2	FALSE	chr14	90332137	-	NA
7993433	0.0412989	1379	0.990921	0.0318497	PDXDC1	FALSE	chr16	14975122	+	NA
8010583	0.0413241	1380	0.990921	-0.0367691	AATK-AS1	FALSE	chr17	81165506	+	NA
8157610	0.0413384	1381	0.990921	0.0409386	DAB2IP	FALSE	chr9	121567101	+	NA
7893526	0.0413432	1382	0.990921	0.250808	NA	FALSE	NA	NA	NA	NA
7895584	0.0414114	1383	0.990921	-0.136349	NA	FALSE	NA	NA	NA	NA
7928107	0.0414118	1384	0.990921	-0.0681467	H2AFY2	FALSE	chr10	70052795	+	NA
8088979	0.0414145	1385	0.990921	-0.0450275	VGLL3	FALSE	chr3	86991107	-	NA
8137584	0.0414191	1386	0.990921	0.0471495	NOM1	FALSE	chr7	156949722	+	NA
7955195	0.0414751	1387	0.990921	-0.0450144	TROAP	FALSE	chr12	49323278	+	NA
8115847	0.0414754	1388	0.990921	-0.110854	NA	FALSE	NA	NA	NA	NA
8180388	0.0415273	1389	0.990921	-0.0450031	NA	FALSE	NA	NA	NA	NA
7917599	0.0415555	1390	0.990921	0.0381606	BARHL2	FALSE	chr1	90717237	-	NA
8117288	0.041606	1391	0.990921	0.0650621	SCGN	FALSE	chr6	25652235	+	NA
8112857	0.041618	1392	0.990921	0.062471	MTX3	FALSE	chr5	79991259	-	NA
8122689	0.0416887	1393	0.990921	-0.034985	GINM1	FALSE	chr6	149566293	+	NA
7896308	0.0417272	1394	0.990921	-0.0308028	NA	FALSE	NA	NA	NA	NA
7895568	0.0417447	1395	0.990921	-0.136213	NA	FALSE	NA	NA	NA	NA
8165888	0.0417938	1396	0.990921	-0.0716699	NA	FALSE	NA	NA	NA	NA
8180379	0.041849	1397	0.990921	0.111979	NA	FALSE	NA	NA	NA	NA
7987426	0.0418611	1398	0.990921	-0.0551286	FSIP1	FALSE	chr15	39782830	-	NA
8152215	0.0418964	1399	0.990921	-0.109957	KLF10	FALSE	chr8	102654375	-	NA
8163381	0.0419193	1400	0.990921	-0.0670748	RNU6-710P	FALSE	chr9	111996739	-	NA
7952022	0.0419225	1401	0.990921	0.0255666	AMICA1	FALSE	chr11	118225094	-	rs533646
8006479	0.04193	1402	0.990921	-0.0405952	LIG3	FALSE	chr17	34980545	+	NA
8081989	0.0419704	1403	0.990921	0.0718788	ARGFX	FALSE	chr3	121570703	+	rs1920296; rs2255214
7959361	0.0420274	1404	0.990921	0.040798	MLXIP	FALSE	chr12	122078721	+	NA
7937251	0.0420501	1405	0.990921	-0.040572	FRG2	FALSE	chr4	190027257	-	NA
8000676	0.0420665	1406	0.990921	0.0521728	NPIPB5	FALSE	chr16	22513522	+	NA
7904025	0.0420735	1407	0.990921	-0.0448859	WNT2B	FALSE	chr1	112466540	+	NA
8106763	0.0421287	1408	0.990921	-0.0405568	RNU4-11P	FALSE	chr5	83803553	+	NA
7899448	0.0421513	1409	0.990921	0.049249	MED18	FALSE	chr1	28329001; 28329037; 28329054; 28329061; 28330282	+	NA
7944911	0.0422055	1410	0.990921	0.0521367	HEPN1	FALSE	chr11	124919243	+	NA
8036420	0.0422061	1411	0.990921	0.0717935	ZFP30	FALSE	chr19	37655412	-	NA
7990027	0.042228	1412	0.990921	-0.0678849	ANP32A-IT1	FALSE	NA	NA	NA	NA
8047262	0.0422886	1413	0.990921	0.0379898	C2orf69	FALSE	chr2	199911255	+	rs281783
8008289	0.0423589	1414	0.990921	-0.0366168	TMEM92	FALSE	chr17	50271405	+	NA
8121747	0.0423637	1415	0.990921	-0.0775828	RNU6-1286P	FALSE	chr6	121354353	+	NA
7997909	0.0423986	1416	0.990921	-0.0448167	SPG7	FALSE	chr16	89508402	+	NA
7933113	0.0424084	1417	0.990921	0.0776913	RNU6-795P	FALSE	chr10	38043975	-	NA
7896413	0.0424808	1418	0.990921	-0.0565654	NA	FALSE	NA	NA	NA	NA
8050548	0.0425075	1419	0.990921	0.0247639	LAPTM4A	FALSE	chr2	20052028	-	NA
7987012	0.0425115	1420	0.990921	-0.0905088	CHRNA7	FALSE	chr15	32030497	+	NA
7911793	0.0425938	1421	0.990921	-0.0778051	LINC00982	FALSE	chr1	3062531; 3063786; 3061751; 3062032; 3068437; 3063682; 3067769	-	rs3748817; rs4648356
8136235	0.0426213	1422	0.990921	-0.0447696	CPA1	FALSE	chr7	130380370	+	NA
8103535	0.0426649	1423	0.990921	0.0581114	GK3P	FALSE	NA	NA	NA	NA
8026035	0.0426918	1424	0.990921	-0.0447547	BEST2	FALSE	chr19	12752592	+	NA
8077877	0.0427292	1425	0.990921	-0.0607653	LOC100130924	FALSE	NA	NA	NA	NA
8105331	0.042736	1426	0.990921	-0.142772	GZMK	FALSE	chr5	55024252	+	NA
8137112	0.0427503	1427	0.990921	-0.0365489	ZNF212	FALSE	chr7	149239650	+	rs354033
8131479	0.0427821	1428	0.990921	0.0360579	MIOS	FALSE	chr7	7566871	+	NA
7940636	0.0429063	1429	0.990921	-0.0493898	SCGB2A2	FALSE	chr11	62270154	+	NA
7902227	0.0429077	1430	0.990921	0.0612824	GADD45A	FALSE	chr1	67685200	+	NA
8018786	0.0429164	1431	0.990921	0.0774939	MXRA7	FALSE	chr17	76690219	-	NA
7893912	0.0429652	1432	0.990921	-0.19911	NA	FALSE	NA	NA	NA	NA
7895474	0.0429721	1433	0.990921	-0.109418	NA	FALSE	NA	NA	NA	NA
8034055	0.042985	1434	0.990921	0.042093	KRI1	FALSE	chr19	10566037	-	rs2288904; rs34536443; rs8112449
7893518	0.0430134	1435	0.990921	-0.0446871	NA	FALSE	NA	NA	NA	NA
8051226	0.0430309	1436	0.990921	0.0597935	TRMT61B	FALSE	chr2	28870301	-	NA
8131414	0.0430508	1437	0.990921	-0.0364676	ZDHHC4	FALSE	chr7	6577433	+	NA
8094936	0.0431237	1438	0.990921	-0.0676024	LOC280665	FALSE	NA	NA	NA	NA
7924150	0.0432099	1439	0.990921	-0.0426788	TMEM206	FALSE	chr1	212414901	-	NA
8075239	0.0432163	1440	0.990921	-0.0347318	THOC5	FALSE	chr22	29553766	-	NA
7923394	0.0432509	1441	0.990921	-0.0334674	ARL8A	FALSE	chr1	202144743	-	NA
8031784	0.0432682	1442	0.990921	0.0611734	ZNF134	FALSE	chr19	57614250	+	NA
8055151	0.0432934	1443	0.990921	-0.030574	POTEE	FALSE	chr2	131218066	+	NA
7924910	0.0432979	1444	0.990921	-0.0287976	ACTA1	FALSE	chr1	229434094	-	NA
7902038	0.0433535	1445	0.990921	0.0596986	AK4	FALSE	chr1	65147829	+	NA
8043718	0.0434078	1446	0.990921	0.037782	COX5B	TRUE	chr2	97646039	+	NA
7897683	0.0434159	1447	0.990921	0.0596803	RNU6-291P	FALSE	chr1	11226253	+	NA
8078260	0.0434643	1448	0.990921	-0.0771897	NA	FALSE	NA	NA	NA	NA
8117608	0.043493	1449	0.990921	-0.0402967	HIST1H2AL	FALSE	chr6	27865354	+	NA
7978107	0.0435058	1450	0.990921	-0.0476805	NRL	FALSE	chr14	24084625	-	NA
7893992	0.0435146	1451	0.990921	-0.109151	NA	FALSE	NA	NA	NA	NA
7925457	0.0435461	1452	0.990921	0.0377566	RGS7	FALSE	chr1	241355776	-	NA
7895513	0.0435535	1453	0.990921	-0.117491	NA	FALSE	NA	NA	NA	NA
8051773	0.0435547	1454	0.990921	-0.053122	NA	FALSE	NA	NA	NA	NA
7894051	0.0435708	1455	0.990921	0.0249655	NA	FALSE	NA	NA	NA	NA
8027320	0.0436151	1456	0.990921	-0.046616	LOC641367	FALSE	NA	NA	NA	NA
7931951	0.0436465	1457	0.990921	0.0731332	SFMBT2	FALSE	chr10	7409341	-	NA
7893235	0.0436504	1458	0.990921	-0.109084	NA	FALSE	NA	NA	NA	NA
8034694	0.0437138	1459	0.990921	0.165712	MIR24-2	FALSE	chr19	13836359	-	NA
7904364	0.0437212	1460	0.990921	0.0377564	WDR3	FALSE	chr1	117929767	+	NA
8062041	0.0437303	1461	0.990921	-0.0363517	ACSS2	FALSE	chr20	34876613	+	NA
8109595	0.0438059	1462	0.990921	-0.0465748	NA	FALSE	chr5	159230193	+	rs11743296; rs2546890
7992887	0.0438251	1463	0.990921	0.0577808	ZNF75A	FALSE	chr16	3305483	+	NA
8128043	0.0438396	1464	0.990921	0.048842	CNR1	FALSE	chr6	88166359; 88164343; 88145365; 88145274; 88145274; 88163024; 88165915	-	NA
7898910	0.0438597	1465	0.990921	0.0253266	PNRC2	FALSE	chr1	23959811	+	NA
8039933	0.0438597	1466	0.990921	0.0253266	PNRC2	FALSE	chr1	23959811	+	NA
7973156	0.0438843	1467	0.990921	-0.0530412	RNASE8	FALSE	chr14	21057821	+	NA
8034202	0.0438934	1468	0.990921	0.037725	RAB3D	FALSE	chr19	11339668	-	NA
7905571	0.0439235	1469	0.990921	-0.0388504	S100A9	FALSE	chr1	153357853	+	NA
7932528	0.0439337	1470	0.990921	0.0711806	EBLN1	FALSE	chr10	22210021	-	NA
8013222	0.0439941	1471	0.990921	-0.0444835	TOP3A	FALSE	chr17	18315007	-	NA
7907012	0.0440207	1472	0.990921	-0.0561622	FMO9P	FALSE	NA	NA	NA	NA
7990090	0.0440627	1473	0.990921	-0.036325	NA	FALSE	NA	NA	NA	NA
7987369	0.0440964	1474	0.990921	0.0617082	DPH6	FALSE	chr15	35546168	-	NA
7894651	0.0441162	1475	0.990921	-0.172425	NA	FALSE	NA	NA	NA	NA
7894841	0.0441318	1476	0.990921	-0.141895	NA	FALSE	NA	NA	NA	NA
7968913	0.0442014	1477	0.990921	-0.0553024	RN7SKP3	FALSE	chr13	45060728	+	NA
7946354	0.0442414	1478	0.990921	0.0376302	LMO1	TRUE	chr11	8268716	-	NA
7962794	0.0442453	1479	0.990921	0.0710723	ZNF641	FALSE	chr12	48351238	-	NA
8003607	0.0443055	1480	0.990921	-0.161049	C17orf97	FALSE	chr17	410326	+	NA
7894588	0.0443266	1481	0.990921	-0.141775	NA	FALSE	NA	NA	NA	NA
7896362	0.0443994	1482	0.990921	-0.0456665	NA	FALSE	NA	NA	NA	NA
8051066	0.0444147	1483	0.990921	0.0252595	MPV17	FALSE	chr2	27323102	-	NA
8056823	0.044444	1484	0.990921	-0.0560535	NA	FALSE	NA	NA	NA	NA
8053584	0.0444566	1485	0.990921	-0.0401171	CD8A	FALSE	chr2	86808396	-	NA
7896208	0.0444738	1486	0.990921	0.111428	NA	FALSE	NA	NA	NA	NA
8180362	0.0445272	1487	0.990921	-0.0443744	NA	FALSE	NA	NA	NA	NA
8050565	0.0445541	1488	0.990921	0.0252428	PUM2	FALSE	chr2	20350850	-	NA
8045155	0.0446131	1489	0.990921	-0.0544276	NA	FALSE	NA	NA	NA	NA
8054941	0.0446517	1490	0.990921	-0.0767748	NA	FALSE	NA	NA	NA	NA
8064939	0.0446674	1491	0.990921	-0.0463905	TMX4	FALSE	chr20	8019829	-	NA
8066279	0.0447497	1492	0.990921	-0.0400632	ZHX3	FALSE	chr20	41300078	-	NA
8160360	0.0447523	1493	0.990921	-0.0602023	IFNB1	FALSE	chr9	21077963	-	NA
7893538	0.04477	1494	0.990921	-0.0895867	NA	FALSE	NA	NA	NA	NA
8097126	0.0447851	1495	0.990921	-0.057247	PP12613	FALSE	chr4	121764584	+	NA
8056005	0.044792	1496	0.990921	0.0357096	ACVR1	FALSE	chr2	157875111	-	NA
7979984	0.0448095	1497	0.990921	0.0357067	ZFYVE1	FALSE	chr14	73027131	-	NA
7985192	0.0448227	1498	0.990921	0.064037	HYKK	FALSE	chr15	78507563	+	rs59772922
8154951	0.0448481	1499	0.990921	0.0375212	GLULP4	FALSE	NA	NA	NA	NA
7933115	0.0449247	1500	0.990921	-0.0361516	SEPT7P9	FALSE	NA	NA	NA	NA
8133225	0.0449513	1501	0.990921	-0.0706364	NA	FALSE	NA	NA	NA	NA
8157802	0.0449566	1502	0.990921	0.0592355	MIR181B2	FALSE	chr9	124693709	+	NA
7907769	0.0449728	1503	0.990921	0.0485762	FAM163A	FALSE	chr1	179743162	+	NA
7963203	0.0449919	1504	0.990921	-0.0571933	FAM186A	FALSE	chr12	50396484	-	NA
7958262	0.0450145	1505	0.990921	-0.0571875	TCP11L2	FALSE	chr12	106302802	+	NA
7965064	0.0450517	1506	0.990921	0.0574392	OSBPL8	FALSE	chr12	76559809	-	NA
8102743	0.045053	1507	0.990921	-0.0489031	NA	FALSE	NA	NA	NA	NA
8001317	0.0451169	1508	0.990921	0.0356546	N4BP1	FALSE	chr16	48610209	-	NA
7893448	0.0451467	1509	0.990921	-0.0558748	NA	FALSE	NA	NA	NA	NA
8156110	0.0451479	1510	0.990921	-0.0558745	RNU4-29P	FALSE	chr9	83275940	+	NA
8175490	0.0451847	1511	0.990921	-0.0669704	NA	FALSE	NA	NA	NA	NA
8021712	0.0452579	1512	0.990921	-0.0472986	RN7SL795P	FALSE	chr18	70512726	+	NA
7932492	0.0452653	1513	0.990921	-0.0941806	C10orf113	FALSE	chr10	21146559	-	NA
7895794	0.0454023	1514	0.990921	-0.0570875	NA	FALSE	NA	NA	NA	NA
8082774	0.0454445	1515	0.990921	-0.0542229	BFSP2	FALSE	chr3	133399994	+	NA
7897449	0.0454767	1516	0.990921	-0.0441827	SPSB1	FALSE	chr1	9292879	+	NA
8043100	0.0455344	1517	0.990921	-0.0238261	TMSB10	TRUE	chr2	84905624	+	NA
8146230	0.0456165	1518	0.990921	0.0572846	CHRNB3	FALSE	chr8	42697418	+	NA
8109001	0.0456334	1519	0.990921	-0.0461873	SPINK5	FALSE	chr5	148063971	+	NA
7893203	0.045651	1520	0.990921	-0.196872	NA	FALSE	NA	NA	NA	NA
7939150	0.0456769	1521	0.990921	-0.0461782	PRRG4	FALSE	chr11	32829942	+	NA
7928602	0.0457092	1522	0.990921	-0.0360518	SFTPA1	FALSE	chr10	79610960; 79610952; 79610954; 79610938; 79610938; 79610944	+	rs1250542; rs1250550; rs1782645
7928632	0.0457092	1523	0.990921	-0.0360518	SFTPA1	FALSE	chr10	79610960; 79610952; 79610954; 79610938; 79610938; 79610944	+	rs1250542; rs1250550; rs1782645
8064751	0.0457319	1524	0.990921	-0.0360026	SPEF1	FALSE	chr20	3781448	-	NA
8073960	0.0457337	1525	0.990921	-0.047197	PIM3	FALSE	chr22	49960512	+	NA
8048763	0.0457474	1526	0.990921	-0.0487498	NYAP2	FALSE	chr2	225400647	+	NA
8064462	0.0457561	1527	0.990921	0.121169	RNU6-917P	FALSE	chr20	1529159	-	NA
8135405	0.0457756	1528	0.990921	-0.0491582	GPR22	FALSE	chr7	107470059	+	NA
7892969	0.0457956	1529	0.990921	-0.0360377	NA	FALSE	NA	NA	NA	NA
8123507	0.0457996	1530	0.990921	0.0342074	TBP	FALSE	chr6	170554332	+	NA
8035684	0.0458762	1531	0.990921	0.0516751	TSSK6	FALSE	chr19	19515685	-	NA
7938213	0.0459035	1532	0.990921	-0.0440977	SYT9	FALSE	chr11	7251949	+	NA
8012099	0.0459183	1533	0.990921	-0.0440947	PHF23	FALSE	chr17	7239439	-	NA
8044844	0.0459718	1534	0.990921	0.0494792	TMEM177	FALSE	chr2	119679166	+	NA
7991296	0.0459837	1535	0.990921	0.0373206	KIF7	FALSE	chr15	89655451	-	NA
7896483	0.0459984	1536	0.990921	0.0414892	NA	FALSE	NA	NA	NA	NA
7908376	0.0460239	1537	0.990921	0.0571741	RGS18	FALSE	chr1	192158456	+	rs1323292; rs1359062; rs2760524
7947245	0.0461401	1538	0.990921	-0.0486639	HSP90AA2	FALSE	NA	NA	NA	NA
7987135	0.0461556	1539	0.990921	-0.140663	NA	FALSE	NA	NA	NA	NA
8024829	0.0461559	1540	0.990921	0.0354808	MPND	FALSE	chr19	4343553	+	NA
7952707	0.0461605	1541	0.990921	0.0372897	PRDM10	FALSE	chr11	130002835	-	NA
8050873	0.046171	1542	0.990921	-0.0657846	NA	FALSE	NA	NA	NA	NA
8129666	0.0462708	1543	0.990921	0.0494097	SLC2A12	FALSE	chr6	134052636	-	NA
7894113	0.0463194	1544	0.990921	-0.196331	NA	FALSE	NA	NA	NA	NA
7982927	0.0463453	1545	0.990921	0.0372889	ITPKA	FALSE	chr15	41493874	+	NA
8064277	0.0463567	1546	0.990921	0.0399567	MYT1	FALSE	chr20	64164473	+	rs2256814; rs6062314
7894464	0.0463624	1547	0.990921	-0.0666199	NA	FALSE	NA	NA	NA	NA
8169385	0.0464334	1548	0.990921	-0.0889317	TDGF1P3	FALSE	NA	NA	NA	NA
8042503	0.0464455	1549	0.990921	0.0703254	MXD1	FALSE	chr2	69915131; 69915108; 69897687; 69915040; 69938151; 69915070	+	NA
8140965	0.0464542	1550	0.990921	-0.0547431	RN7SL7P	FALSE	chr7	92971299	-	NA
8127364	0.0464805	1551	0.990921	-0.0597378	GUSBP4	FALSE	NA	NA	NA	NA
7957260	0.0465279	1552	0.990921	0.024091	GLIPR1	FALSE	chr12	75480679	+	NA
7955076	0.0465726	1553	0.990921	-0.0383843	LOC101927180	FALSE	NA	NA	NA	NA
7899287	0.0465795	1554	0.990921	-0.0329598	NA	FALSE	NA	NA	NA	NA
8059097	0.0465866	1555	0.990921	-0.0439629	CNPPD1	FALSE	chr2	219176966	-	NA
8098611	0.0466905	1556	0.990921	-0.0567602	TLR3	FALSE	chr4	186069151	+	NA
8043597	0.0468027	1557	0.990921	-0.0425	ITPRIPL1	FALSE	chr2	96326222	+	NA
7892982	0.0468178	1558	0.990921	0.205509	NA	FALSE	NA	NA	NA	NA
8180371	0.0468439	1559	0.990921	-0.0239939	NA	FALSE	NA	NA	NA	NA
8173174	0.0468466	1560	0.990921	-0.0439121	USP51	FALSE	NA	NA	NA	NA
7896076	0.0468629	1561	0.990921	0.0459254	NA	FALSE	NA	NA	NA	NA
8119153	0.0469513	1562	0.990921	-0.0277217	COX6A1	TRUE	chr12	120438089	+	NA
7936706	0.0470466	1563	0.990921	0.0284996	MCMBP	FALSE	chr10	119858237; 119872754; 119872849; 119873621; 119892556	-	NA
8100292	0.0470718	1564	0.990921	-0.0396456	FRYL	FALSE	chr4	48653917	-	NA
8006940	0.0470825	1565	0.990921	0.0371304	GRB7	FALSE	chr17	39738336	+	rs12946510
8026877	0.0470966	1566	0.990921	-0.0358279	SLC5A5	FALSE	chr19	17871972	+	rs11554159; rs874628
7894918	0.0471718	1567	0.990921	0.162874	NA	FALSE	NA	NA	NA	NA
8108954	0.0471826	1568	0.990921	0.0356694	TCERG1	FALSE	chr5	146447311	+	NA
8041553	0.0472254	1569	0.990921	0.0442995	GEMIN6	FALSE	chr2	38778184	+	NA
8026272	0.047227	1570	0.990921	0.048064	IL27RA	FALSE	chr19	14031747	+	NA
8114691	0.047233	1571	0.990921	-0.0300277	HDAC3	FALSE	chr5	141636870	-	rs35952555
8087453	0.0472429	1572	0.990921	0.0371342	AMIGO3	FALSE	chr3	49719695	-	NA
7894796	0.0472473	1573	0.990921	-0.0396148	NA	FALSE	NA	NA	NA	NA
8030842	0.0472477	1574	0.990921	0.0412487	MIR99B	FALSE	chr19	51692611	+	NA
8101893	0.0472986	1575	0.990921	0.0607752	ADH1C	FALSE	chr4	99353027	-	NA
7918753	0.0473409	1576	0.990921	0.0710471	NA	FALSE	chr1	114670422	-	NA
7955358	0.0473714	1577	0.990921	-0.0423929	COX14	FALSE	chr12	50112203	+	NA
8175360	0.0473826	1578	0.990921	0.0290864	MMGT1	FALSE	NA	NA	NA	NA
8017098	0.0474488	1579	0.990921	-0.132865	NA	FALSE	NA	NA	NA	NA
8147047	0.0474593	1580	0.990921	-0.0521953	RNU7-174P	FALSE	chr8	80560566	+	NA
8027592	0.0474769	1581	0.990921	0.0352646	LSM14A	FALSE	chr19	34172567	+	NA
7988963	0.0474792	1582	0.990921	-0.0357671	ARPP19	FALSE	chr15	52569164	-	NA
7979931	0.0474895	1583	0.990921	0.0370921	MED6	FALSE	chr14	70600655	-	NA
7959148	0.0475058	1584	0.990921	-0.0487815	SIRT4	FALSE	chr12	120302320	+	NA
8144505	0.047509	1585	0.990921	0.039744	CLDN23	FALSE	chr8	8701937	+	NA
8100393	0.0475826	1586	0.990921	0.043667	KDR	FALSE	chr4	55125589	-	NA
7956005	0.0475878	1587	0.990921	-0.0653765	OR2AP1	FALSE	chr12	55574414	+	NA
8004431	0.0475885	1588	0.990921	-0.0282385	POLR2A	TRUE	chr17	7484378	+	NA
7947932	0.0475916	1589	0.990921	-0.0884869	NA	FALSE	NA	NA	NA	NA
8128034	0.047606	1590	0.990921	0.0411808	AKIRIN2	FALSE	chr6	87702209	-	NA
7945418	0.0476186	1591	0.990921	0.0550291	RN7SL838P	FALSE	chr11	440693	-	NA
7971620	0.0476722	1592	0.990921	0.0339121	KPNA3	FALSE	chr13	49792921	-	NA
7894401	0.0476804	1593	0.990921	-0.110179	NA	FALSE	NA	NA	NA	NA
7904883	0.0476836	1594	0.990921	-0.0536866	CHD1L	FALSE	chr1	147242640; 147242640; 147242683; 147242683; 147242683; 147242683; 147242703; 147242745; 147270903; 147270994	+	NA
8133845	0.0477051	1595	0.990921	-0.0884438	NA	FALSE	NA	NA	NA	NA
8036989	0.0477205	1596	0.990921	-0.0560186	NA	FALSE	NA	NA	NA	NA
8044333	0.047733	1597	0.990921	0.0339027	LIMS3L	FALSE	chr2	110473075	-	NA
8054519	0.047733	1598	0.990921	0.0339027	LIMS3L	FALSE	chr2	110473075	-	NA
7894595	0.0478005	1599	0.990921	-0.0544195	NA	FALSE	NA	NA	NA	NA
7941685	0.0478316	1600	0.990921	0.0370029	CCS	FALSE	chr11	66592820	+	NA
8112584	0.0478363	1601	0.990921	0.0566925	ZNF366	FALSE	chr5	72507727	-	NA
7978666	0.0478556	1602	0.990921	0.0396809	MBIP	FALSE	chr14	36320627	-	NA
7894104	0.0479011	1603	0.990921	0.0370223	NA	FALSE	NA	NA	NA	NA
8164562	0.0479055	1604	0.990921	0.033876	C9orf50	FALSE	chr9	129620776	-	NA
8085581	0.0479192	1605	0.990921	0.0566708	COLQ	FALSE	chr3	15521751	-	NA
7953737	0.0479493	1606	0.990921	-0.139608	CLEC6A	FALSE	chr12	8455925	+	NA
8077036	0.0479526	1607	0.990921	0.0310916	DENND6B	FALSE	chr22	50327060	-	rs470119
7922462	0.0479788	1608	0.990921	0.0370091	MRPS14	FALSE	chr1	175023425	-	NA
8102775	0.0480001	1609	0.990921	-0.0467247	NA	FALSE	NA	NA	NA	NA
7953098	0.0480179	1610	0.990921	0.0583892	NA	FALSE	NA	NA	NA	NA
7895668	0.0480877	1611	0.990921	0.119819	NA	FALSE	NA	NA	NA	NA
8089627	0.048123	1612	0.990921	0.0506845	SPICE1	FALSE	chr3	113515156	-	NA
8166098	0.0481397	1613	0.990921	0.0410803	RAB9A	FALSE	NA	NA	NA	NA
8128650	0.0481532	1614	0.990921	0.0248252	SEC63	FALSE	chr6	107958189	-	NA
7919929	0.0482385	1615	0.990921	0.0506577	TMOD4	FALSE	chr1	151176016	-	NA
8056100	0.04832	1616	0.990921	-0.0882118	NA	FALSE	NA	NA	NA	NA
8006679	0.04834	1617	0.990921	-0.0380855	NA	FALSE	NA	NA	NA	NA
7976425	0.0483764	1618	0.990921	-0.0481863	OTUB2	FALSE	chr14	94026377	+	NA
7894916	0.048431	1619	0.990921	-0.0436071	NA	FALSE	NA	NA	NA	NA
7971104	0.0484501	1620	0.990921	-0.0481709	TRPC4	FALSE	chr13	37869802	-	NA
7965038	0.0484659	1621	0.990921	-0.0481676	RN7SL734P	FALSE	chr12	75958130	-	NA
8076612	0.0485377	1622	0.990921	0.0455732	EFCAB6	FALSE	chr22	43812277	-	NA
8170097	0.0485614	1623	0.990921	-0.0326718	SLC9A6	FALSE	NA	NA	NA	NA
8106193	0.0485797	1624	0.990921	0.0455645	UTP15	FALSE	chr5	73565772	+	NA
7996160	0.0485835	1625	0.990921	-0.0485527	LOC388282	FALSE	NA	NA	NA	NA
7994675	0.0485991	1626	0.990921	-0.0393802	ASPHD1	FALSE	chr16	29900719	+	rs7204270
7984253	0.0486093	1627	0.990921	0.0409927	KBTBD13	FALSE	chr15	65076815	+	NA
8012247	0.04862	1628	0.990921	-0.0393767	SAT2	FALSE	chr17	7627855	-	NA
7980983	0.0486607	1629	0.990921	-0.0326577	MOAP1	FALSE	chr14	93184928	-	NA
7943282	0.0486643	1630	0.990921	-0.0465898	KDM4D	FALSE	chr11	94973680	+	NA
7894580	0.0487713	1631	0.990921	0.187747	NA	FALSE	NA	NA	NA	NA
7896157	0.0488165	1632	0.990921	0.0368378	NA	FALSE	NA	NA	NA	NA
7896176	0.0488172	1633	0.990921	-0.043534	NA	FALSE	NA	NA	NA	NA
8111455	0.0488303	1634	0.990921	-0.0485009	GUSBP2	FALSE	NA	NA	NA	NA
8125857	0.0488428	1635	0.990921	-0.0880164	RN7SL200P	FALSE	chr6	34685642	-	NA
7942073	0.0488591	1636	0.990921	-0.0355224	IGHMBP2	FALSE	chr11	68903841	+	NA
7989718	0.0488673	1637	0.990921	-0.0379981	RASL12	FALSE	chr15	65068112	-	NA
8144931	0.0489129	1638	0.990921	0.0288853	ATP6V1B2	FALSE	chr8	20197366	+	NA
8127419	0.0489375	1639	0.990921	0.0705245	ADH5P4	FALSE	NA	NA	NA	NA
8028737	0.0489387	1640	0.990921	0.0732226	LGALS13	FALSE	chr19	39602523	+	NA
8098554	0.0489623	1641	0.990921	0.0595476	RN7SL28P	FALSE	chr4	184278935	+	NA
7921342	0.0489843	1642	0.990921	-0.0435025	LOC729866	FALSE	NA	NA	NA	NA
8007867	0.0490556	1643	0.990921	-0.0649642	LRRC37A2	FALSE	chr17	46512709	+	NA
7895229	0.0490594	1644	0.990921	-0.168924	NA	FALSE	NA	NA	NA	NA
8173892	0.0490898	1645	0.990921	0.0367925	CHM	FALSE	NA	NA	NA	NA
8168790	0.0492198	1646	0.990921	-0.0498995	TMEM35	FALSE	NA	NA	NA	NA
7932160	0.0492473	1647	0.990921	-0.0533244	FAM107B	FALSE	chr10	14522225; 14532710; 14548640; 14548670; 14553454; 14554229; 14555885; 14556171; 14556180; 14556414; 14571999; 14572030; 14572032; 14572096; 14572113; 14572128; 14572155; 14572155; 14572189; 14572189; 14572314; 14572339; 14604270; 14604295; 14604389; 14604418; 14612552; 14774705; 14774897	-	NA
7999520	0.0492517	1648	0.990921	0.0282162	RSL1D1	FALSE	chr16	11851585	-	NA
8026170	0.0492612	1649	0.990921	-0.0392674	CCDC130	FALSE	chr19	13747778	+	NA
8020352	0.0493284	1650	0.990921	-0.131833	CYP4F35P	FALSE	chr18	14340403	+	NA
8126860	0.0493318	1651	0.990921	0.0711918	MUT	FALSE	chr6	49463191	-	NA
7901948	0.0493357	1652	0.990921	-0.075222	DLEU2L	FALSE	chr1	63547081	+	NA
8072847	0.0493521	1653	0.990921	-0.0479837	SH3BP1	FALSE	chr22	37639474	+	NA
7928208	0.0493538	1654	0.990921	-0.0464514	SLC29A3	FALSE	chr10	71319281; 71351687; 71319257	+	NA
8078918	0.0493698	1655	0.990921	-0.0756228	SNORA62	FALSE	chr3	39411053	+	NA
8151842	0.0494448	1656	0.990921	0.036734	KIAA1429	FALSE	chr8	94553523	-	NA
8001938	0.0494593	1657	0.990921	-0.0354589	TRADD	FALSE	chr16	67160298	-	NA
8061167	0.049578	1658	0.990921	-0.053249	LINC00851	FALSE	chr20	18379048	+	NA
8014115	0.0495844	1659	0.990921	-0.193776	MYO1D	FALSE	chr17	32877177	-	NA
8097947	0.0496395	1660	0.990921	-0.0692074	NA	FALSE	NA	NA	NA	NA
8016324	0.0496532	1661	0.990921	0.0413494	CDC27	FALSE	chr17	47189176	-	rs4794058
7950555	0.0496786	1662	0.990921	-0.0463868	LRRC32	FALSE	chr11	76670747	-	NA
8110253	0.0497426	1663	0.990921	0.0407842	ZNF346	FALSE	chr5	177022695	+	rs4075958; rs4976646
8057004	0.0497538	1664	0.990921	0.0544962	PDE11A	FALSE	chr2	177888738	-	NA
8044351	0.0497998	1665	0.990921	-0.0378454	RPL22P11	FALSE	NA	NA	NA	NA
8052382	0.0498349	1666	0.990921	0.0659841	FANCL	FALSE	chr2	58241350	-	NA
7899071	0.0498675	1667	0.990921	0.0702268	RNU6-110P	FALSE	chr1	25964196	+	NA
7894105	0.0498997	1668	0.990921	-0.138495	NA	FALSE	NA	NA	NA	NA
8171516	0.049901	1669	0.990921	0.0305868	RBBP7	FALSE	NA	NA	NA	NA
7894755	0.0499863	1670	0.990921	-0.114301	NA	FALSE	NA	NA	NA	NA
8135114	0.049996	1671	0.990921	-0.0240299	CUX1	FALSE	chr7	101816010	+	NA
7997164	0.0500318	1672	0.990921	-0.069093	RNU6-208P	FALSE	chr16	71666090	+	NA
8164252	0.0501151	1673	0.990921	-0.0396291	SH2D3C	FALSE	chr9	127744720; 127755030; 127755274; 127755304; 127762188; 127762287; 127762416; 127762418; 127771369; 127771438; 127774144; 127778710; 127778741	-	NA
8129804	0.0501391	1674	0.990921	-0.0336706	MAP3K5	FALSE	chr6	136792518	-	rs17066096
7899284	0.0501645	1675	0.990921	0.0365992	TRNP1	FALSE	chr1	26993706	+	NA
8038933	0.0501921	1676	0.990921	0.0691207	ZNF614	FALSE	chr19	52028570	-	NA
8139031	0.0502312	1677	0.990921	-0.074939	NA	FALSE	NA	NA	NA	NA
7903404	0.0502649	1678	0.990921	0.0569107	RNPC3	FALSE	chr1	103525970	+	NA
8167322	0.0502708	1679	0.990921	-0.0324312	WDR13	FALSE	NA	NA	NA	NA
7895321	0.0502861	1680	0.990921	0.186393	NA	FALSE	NA	NA	NA	NA
8013071	0.0503096	1681	0.990921	0.0461698	FLCN	FALSE	chr17	17237139	-	NA
8051422	0.0503128	1682	0.990921	0.0365923	MYADML	FALSE	NA	NA	NA	NA
8147479	0.0504411	1683	0.990921	-0.0545982	NA	FALSE	NA	NA	NA	NA
8062064	0.0504469	1684	0.990921	0.0334922	MYH7B	FALSE	chr20	34975402	+	NA
8043564	0.0504508	1685	0.990921	-0.0481658	FAHD2A	FALSE	chr2	95402725	+	NA
7992737	0.0504571	1686	0.990921	-0.0432289	FLYWCH2	FALSE	chr16	2883212	+	NA
8151413	0.0505039	1687	0.990921	0.0347877	TCEB1	FALSE	chr8	73970637; 73971908; 73971908; 73972106; 73972170; 73972186; 73972232; 73972247; 73972252; 73972287	-	NA
7933204	0.0505108	1688	0.990921	0.0451713	C10orf10	FALSE	chr10	44978810	-	NA
7898998	0.0505253	1689	0.990921	-0.074847	RHD	FALSE	chr1	25272392; 25272392; 25272485; 25272497; 25272547; 25272547; 25272547; 25272547; 25272547; 25272547; 25272547	+	NA
8175209	0.0505961	1690	0.990921	0.0542913	TFDP3	FALSE	NA	NA	NA	NA
7903565	0.05062	1691	0.990921	-0.045192	GPSM2	FALSE	chr1	108876980	+	NA
8075483	0.0506795	1692	0.990921	-0.0545433	PIK3IP1	FALSE	chr22	31292534	-	NA
8102560	0.0506828	1693	0.990921	0.0505511	MAD2L1	FALSE	chr4	120067074	-	NA
8023394	0.0506899	1694	0.990921	0.0598442	STARD6	FALSE	chr18	54354573	-	NA
8160682	0.0507016	1695	0.990921	0.0436091	NOL6	FALSE	chr9	33473930	-	NA
8117622	0.0507174	1696	0.990921	0.054262	OR2B6	FALSE	chr6	27957240	+	NA
8077376	0.0507387	1697	0.990921	-0.0431773	ITPR1	FALSE	chr3	4493349	+	NA
8034313	0.0507498	1698	0.990921	0.0238383	HNRNPA1	FALSE	chr12	54280192	+	NA
8145532	0.0508246	1699	0.990921	-0.0653553	EPHX2	FALSE	chr8	27492841; 27490780; 27491194; 27505046; 27515462; 27491209; 27491124; 27491191; 27491165; 27491124; 27491150; 27490778	+	NA
8053551	0.0508564	1700	0.990921	0.0451023	REEP1	FALSE	chr2	86338083	-	NA
8078991	0.0508674	1701	0.990921	0.0451001	ZNF619	FALSE	chr3	40477112	+	NA
8155345	0.050896	1702	0.990921	-0.0443799	FAM74A4	FALSE	NA	NA	NA	NA
7895447	0.0509148	1703	0.990921	0.0245223	NA	FALSE	NA	NA	NA	NA
8131927	0.0509311	1704	0.990921	-0.0588145	MPP6	FALSE	chr7	24573345	+	NA
7948375	0.050973	1705	0.990921	-0.0563981	OR5BB1P	FALSE	NA	NA	NA	NA
7964745	0.0509901	1706	0.990921	0.0347133	TMBIM4	FALSE	chr12	66169962	-	NA
8175365	0.0510006	1707	0.990921	-0.0529294	NA	FALSE	NA	NA	NA	NA
7926708	0.0510235	1708	0.990921	0.0558819	THNSL1	FALSE	chr10	25016657	+	NA
8147750	0.0510712	1709	0.990921	-0.0498036	NA	FALSE	NA	NA	NA	NA
8170307	0.0510806	1710	0.990921	-0.0476327	SLITRK2	FALSE	NA	NA	NA	NA
8134318	0.0511316	1711	0.990921	0.0405341	CASD1	FALSE	chr7	94509797	+	NA
7988703	0.0511708	1712	0.990921	0.0621863	NA	FALSE	NA	NA	NA	NA
7999981	0.0512402	1713	0.990921	-0.0416919	ACSM1	FALSE	chr16	20691256	-	NA
8123148	0.0513371	1714	0.990921	-0.0389214	MRPL18	FALSE	chr6	159790465	+	NA
8136641	0.0513633	1715	0.990921	-0.0535983	TAS2R3	FALSE	chr7	141764096	+	NA
8104072	0.0514032	1716	0.990921	0.0463373	FLJ38576	FALSE	chr4	186191490	-	NA
8095834	0.051411	1717	0.990921	-0.0430552	SHROOM3	FALSE	chr4	76435099	+	NA
8120215	0.0514704	1718	0.990921	-0.0475548	PAQR8	FALSE	chr6	52362127	+	NA
8102249	0.0515497	1719	0.990921	-0.0562624	ETNPPL	FALSE	chr4	108763008	-	NA
8132843	0.0516136	1720	0.990921	0.0723455	HAUS6	FALSE	chr9	19065084; 19093213; 19103119	-	NA
8058182	0.0516214	1721	0.990921	0.0363826	FAM126B	FALSE	chr2	201071669	-	NA
8020209	0.0516452	1722	0.990921	-0.0555674	RNU6-324P	FALSE	chr18	12098426	+	NA
8121704	0.0516462	1723	0.990921	0.0303534	NUS1	FALSE	chr6	117675501	+	NA
8121392	0.0517548	1724	0.990921	-0.0747608	CEP57L1	FALSE	chr6	109095109; 109095152; 109095152; 109095157; 109095162; 109095181; 109095184; 109095187; 109095480; 109095495; 109095504; 109095509; 109095509; 109095511; 109095518; 109095519; 109095523; 109095525; 109095528; 109095543; 109095550; 109095561; 109129303; 109155790	+	NA
7996879	0.0517801	1725	0.990921	-0.0478977	RPS2P45	FALSE	NA	NA	NA	NA
8022247	0.0518266	1726	0.990921	-0.0869328	NA	FALSE	NA	NA	NA	NA
7896750	0.0518591	1727	0.990921	0.200572	MT-TD	FALSE	NA	NA	NA	NA
7894886	0.0519359	1728	0.990921	-0.105313	NA	FALSE	NA	NA	NA	NA
7948900	0.05199	1729	0.990921	0.0951402	SNORD30	FALSE	chr11	62853732	-	NA
8023133	0.0520347	1730	0.990921	0.0695509	PIAS2	FALSE	chr18	46917345	-	NA
8037535	0.0520754	1731	0.990921	-0.0441611	RPS16P9	FALSE	NA	NA	NA	NA
7963911	0.0521301	1732	0.990921	0.0363023	CD63	FALSE	chr12	55729707	-	NA
8156633	0.0521386	1733	0.990921	-0.0429245	CCDC180	FALSE	chr9	97307658	+	NA
8174634	0.0521533	1734	0.990921	-0.0429219	NA	FALSE	NA	NA	NA	NA
7976724	0.0521619	1735	0.990921	-0.0350544	RNU1-47P	FALSE	chr14	99945314	+	NA
8078600	0.052165	1736	0.990921	0.0332418	TCEA1	FALSE	chr8	54022529	-	NA
8121454	0.0521803	1737	0.990921	0.0427795	GPR6	FALSE	chr6	109978255	+	NA
7896474	0.0522184	1738	0.990921	-0.0474069	NA	FALSE	NA	NA	NA	NA
8021181	0.0522441	1739	0.990921	0.0694869	SCARNA17	FALSE	chr1 chr18 chr22	26006005; 49814132; 18605354; 21389938; 21544896	+	NA
8136138	0.0522489	1740	0.990921	-0.0549523	RNU1-72P	FALSE	chr7	129484503	+	NA
8168463	0.052257	1741	0.990921	0.0502026	FGF16	FALSE	NA	NA	NA	NA
8097780	0.0522593	1742	0.990921	-0.0684568	ZBTB8OSP1	FALSE	NA	NA	NA	NA
8165676	0.0522647	1743	0.990921	0.0243793	ND4	FALSE	NA	NA	NA	NA
8167912	0.0522799	1744	0.990921	-0.0582769	KLF8	FALSE	NA	NA	NA	NA
7895106	0.0523043	1745	0.990921	-0.0526429	NA	FALSE	NA	NA	NA	NA
7896569	0.0523446	1746	0.990921	-0.113214	NA	FALSE	NA	NA	NA	NA
8084891	0.0523446	1747	0.990921	-0.0473821	FAM43A	FALSE	chr3	194686543	+	NA
8120758	0.0523961	1748	0.990921	-0.0387493	SENP6	FALSE	chr6	75601508	+	NA
7894355	0.052432	1749	0.990921	0.0741245	NA	FALSE	NA	NA	NA	NA
8113276	0.0524931	1750	0.990921	-0.047353	NA	FALSE	NA	NA	NA	NA
7893807	0.0525753	1751	0.990921	-0.0745103	NA	FALSE	NA	NA	NA	NA
7914489	0.0525905	1752	0.990921	-0.0276375	PTP4A2	FALSE	chr1	31919109	-	NA
7965224	0.0526057	1753	0.990921	0.0683846	NA	FALSE	NA	NA	NA	NA
8052018	0.0526379	1754	0.990921	0.0402693	KCNK12	FALSE	chr2	47570939	-	NA
7895275	0.0526535	1755	0.990921	0.0496722	NA	FALSE	NA	NA	NA	NA
8037856	0.0526615	1756	0.990921	0.0402652	ZC3H4	FALSE	chr19	47113752	-	NA
8162584	0.052688	1757	0.990921	0.0501088	RNU6-1160P	FALSE	chr9	96256319	-	NA
7899436	0.0527153	1758	0.990921	-0.0386981	SESN2	FALSE	chr1	28259526	+	NA
7894930	0.0527477	1759	0.990921	-0.136932	NA	FALSE	NA	NA	NA	NA
8139158	0.0527586	1760	0.990921	-0.04479	RN7SL83P	FALSE	chr7	38531338	-	NA
8135585	0.0527813	1761	0.990921	0.0948068	NA	FALSE	NA	NA	NA	NA
7918050	0.0528229	1762	0.990921	0.0344384	RPSA	FALSE	chr3	39406688; 39406715; 39406717; 39406718; 39406732; 39406734; 39406762; 39408203; 39410258	+	NA
7894874	0.0528908	1763	0.990921	-0.136856	NA	FALSE	NA	NA	NA	NA
8105144	0.0529391	1764	0.990921	-0.0639204	NA	FALSE	NA	NA	NA	NA
7893236	0.0530133	1765	0.990921	0.0800135	NA	FALSE	NA	NA	NA	NA
7908125	0.0530437	1766	0.990921	0.0895282	RGL1	FALSE	chr1	183636084	+	NA
7900413	0.0530463	1767	0.990921	0.0361594	ZMPSTE24	FALSE	chr1	40258106	+	NA
8099834	0.0530587	1768	0.990921	0.0537085	TLR1	FALSE	chr4	38804791	-	NA
8005978	0.0530741	1769	0.990921	-0.0320509	TRAF4	FALSE	chr17	28743983	+	NA
8097543	0.0530866	1770	0.990921	0.0407322	ZNF330	FALSE	chr4	141220886; 141220886; 141220899; 141220910; 141220927; 141220929; 141220929; 141220933	+	NA
7896422	0.0531052	1771	0.990921	0.0682359	NA	FALSE	NA	NA	NA	NA
8057557	0.0531237	1772	0.990921	0.055371	NA	FALSE	NA	NA	NA	NA
8022761	0.0531353	1773	0.990921	-0.0959429	NA	FALSE	NA	NA	NA	NA
7899289	0.053148	1774	0.990921	-0.0320411	WDTC1	FALSE	chr1	27234515	+	NA
8002758	0.0531623	1775	0.990921	-0.0821323	NA	FALSE	NA	NA	NA	NA
8054804	0.0532357	1776	0.990921	0.0361605	CCDC93	FALSE	chr2	118014133	-	NA
8110587	0.0532796	1777	0.990921	-0.0413398	RNU6-525P	FALSE	chr5	180444508	+	NA
7894544	0.053284	1778	0.990921	-0.112793	NA	FALSE	NA	NA	NA	NA
7960559	0.0532939	1779	0.990921	0.0361211	IFFO1	FALSE	chr12	6551900; 6549265; 6550467; 6551900; 6556071; 6556071; 6556071; 6556083; 6556073; 6556063; 6556071; 6549113	-	rs12296430; rs1800693
8145291	0.053322	1780	0.990921	0.057026	SLC25A37	FALSE	chr8	23528804	+	NA
7999419	0.0533312	1781	0.990921	0.069158	DEXI	FALSE	chr16	10942460	-	rs12708716; rs12927355; rs4780346; rs6498184; rs7191700; rs7200786
7902448	0.0533437	1782	0.990921	-0.0230305	RPL17	TRUE	chr18	49492482; 49490938; 49492409; 49491840; 49492444; 49492479; 49492523; 49491814; 49492399; 49492432; 49490468; 49492483; 49491586; 49490874; 49492508; 49492428; 49492433; 49490969; 49492305; 49492430; 49492450; 49492485; 49492485; 49492479	-	NA
7895772	0.0533574	1783	0.990921	0.127091	NA	FALSE	NA	NA	NA	NA
8008185	0.0534023	1784	0.990921	0.0446057	ABI3	FALSE	chr17	49210410	+	NA
7921447	0.0534126	1785	0.990921	-0.0582155	OR10J5	FALSE	chr1	159536007	-	NA
8005157	0.0534735	1786	0.990921	0.0515453	PIGL	FALSE	chr17	16217209	+	NA
7924663	0.0535566	1787	0.990921	-0.0438921	LEFTY1	FALSE	chr1	225889146	-	NA
8117178	0.0535612	1788	0.990921	0.0406496	NRSN1	FALSE	chr6	24126185	+	NA
7895309	0.0535984	1789	0.990921	-0.129603	NA	FALSE	NA	NA	NA	NA
8146633	0.0536076	1790	0.990921	-0.0680824	UG0898H09	FALSE	chr8	62977860	+	NA
8120585	0.0536136	1791	0.990921	-0.0385551	SMAP1	FALSE	chr6	70667775	+	NA
7969792	0.0536175	1792	0.990921	0.0300976	RN7SKP9	FALSE	chr13	99205707	+	rs4772201
7997032	0.0536223	1793	0.990921	-0.0348148	CLEC18B	FALSE	chr16	74421392	-	NA
8148923	0.0536524	1794	0.990921	0.0386792	LRRC14	FALSE	chr8	144518004	+	NA
8087374	0.0536609	1795	0.990921	0.0458865	C3orf62	FALSE	chr3	49277909	-	NA
8009666	0.0537112	1796	0.990921	-0.0508353	RAB37	FALSE	chr17	74737216	+	NA
8113220	0.0537721	1797	0.990921	0.0445353	ELL2	FALSE	chr5	95962071	-	NA
7975799	0.0537842	1798	0.990921	0.0552138	FLVCR2	FALSE	chr14	75605461	+	rs2300603; rs4903324
8033996	0.0538345	1799	0.990921	0.0282728	TYK2	FALSE	chr19	10380676	-	rs2288904; rs34536443; rs8112449
7950921	0.0538348	1800	0.990921	-0.0347844	GRM5	FALSE	chr11	89063648	-	NA
7894467	0.0538359	1801	0.990921	-0.0819107	NA	FALSE	NA	NA	NA	NA
7923850	0.0538412	1802	0.990921	0.0445222	SLC26A9	FALSE	chr1	205943460	-	NA
8059969	0.0538869	1803	0.990921	-0.038512	ILKAP	FALSE	chr2	238184096	-	NA
7894103	0.0539078	1804	0.990921	-0.104489	NA	FALSE	NA	NA	NA	NA
7971642	0.0539662	1805	0.990921	-0.0861867	RNY4P9	FALSE	chr13	49908730	-	NA
7919049	0.0539725	1806	0.990921	-0.0474675	GAPDHP27	FALSE	NA	NA	NA	NA
8117580	0.0539986	1807	0.990921	-0.0578697	HIST1H2AI	FALSE	chr6	27808198	+	NA
7906978	0.0540305	1808	0.990921	0.0614159	MGST3	FALSE	chr1	165630860; 165631212; 165631225; 165631236; 165631238; 165631239; 165631254; 165631257; 165632062; 165632239; 165645660; 165648791; 165649837; 165653832	+	NA
8157270	0.054057	1809	0.990921	0.0466298	SLC31A1	FALSE	chr9	113221561	+	NA
8042062	0.0540688	1810	0.990921	-0.0861515	NA	FALSE	NA	NA	NA	NA
8045664	0.0541115	1811	0.990921	-0.0384767	LYPD6B	FALSE	chr2	149038466	+	NA
8168604	0.054187	1812	0.990921	-0.0411867	DACH2	FALSE	NA	NA	NA	NA
8120679	0.0542799	1813	0.990921	-0.090702	DDX43	FALSE	chr6	73394747	+	NA
8110399	0.0543058	1814	0.990921	-0.0347175	B4GALT7	FALSE	chr5	177600099	+	rs4075958; rs4976646
8007850	0.0543593	1815	0.990921	-0.0635543	LRRC37A2	FALSE	chr17	46512709	+	NA
8077185	0.0543678	1816	0.990921	0.0282093	APOA1	FALSE	chr11	116837950	-	NA
8097811	0.054412	1817	0.990921	0.0550659	DKFZP434I0714	FALSE	chr4	152536263	+	NA
8075616	0.0544141	1818	0.990921	-0.0347022	SYN3	FALSE	chr22	33058372; 32529071; 32519686; 32541716; 32529082; 32530202; 32530188; 32541716; 32869100; 32869058; 32947579; 33057858; 33014529	-	NA
7984470	0.0544548	1819	0.990921	0.0275878	FEM1B	FALSE	chr15	68277802	+	NA
7900409	0.0544554	1820	0.990921	-0.0537021	TMCO2	FALSE	chr1	40247900	+	NA
8084016	0.0545021	1821	0.990921	0.0359364	PIK3CA	FALSE	chr3	179148522	+	NA
8147754	0.0545318	1822	0.990921	-0.038411	NA	FALSE	NA	NA	NA	NA
7902787	0.0545467	1823	0.990921	-0.0445409	NA	FALSE	NA	NA	NA	NA
7986627	0.054564	1824	0.990921	-0.0859826	RNU6-631P	FALSE	chr15	21866316	-	NA
8043209	0.0546164	1825	0.990921	-0.0318487	RNF181	FALSE	chr2	85595733	+	NA
8042830	0.0546359	1826	0.990921	0.0476043	MTHFD2	FALSE	chr2	74198561	+	NA
7895690	0.0546746	1827	0.990921	-0.0318411	NA	FALSE	NA	NA	NA	NA
7971967	0.0546986	1828	0.990921	0.032885	DIS3	FALSE	chr13	72781925	-	NA
8160968	0.0547622	1829	0.990921	-0.0290816	STOML2	FALSE	chr9	35103195	-	NA
8143781	0.0547785	1830	0.990921	0.0464874	GIMAP6	FALSE	chr7	150632648	-	NA
8173198	0.0549185	1831	0.990921	-0.0634124	SPIN2A	FALSE	NA	NA	NA	NA
7948141	0.0549542	1832	0.990921	-0.0548224	OR5M5P	FALSE	NA	NA	NA	NA
7892694	0.0550541	1833	0.990921	0.0644943	NA	FALSE	NA	NA	NA	NA
8152090	0.0551042	1834	0.990921	-0.0682705	RNU6ATAC41P	FALSE	chr8	100739927	-	NA
8044109	0.055128	1835	0.990921	0.0344486	POU3F3	FALSE	chr2	104855510	+	NA
8119580	0.0551492	1836	0.990921	-0.0903921	RNU6-890P	FALSE	chr6	42664161	+	NA
8147724	0.0551581	1837	0.990921	0.0358376	ATP6V1C1	FALSE	chr8	103021062	+	NA
8092187	0.0551673	1838	0.990921	-0.0468402	SPATA16	FALSE	chr3	173141268	-	NA
8140371	0.0552069	1839	0.990921	-0.034619	TMEM120A	FALSE	chr7	75994659	-	NA
8148962	0.0552135	1840	0.990921	-0.0520242	OR4F29	FALSE	chr1	451678	-	NA
8061428	0.0552296	1841	0.990921	-0.0317696	ENTPD6	TRUE	chr20	25195692	+	NA
7966706	0.0552539	1842	0.990921	0.0240733	MED13L	FALSE	chr12	116277338	-	NA
8161407	0.0552609	1843	0.990921	-0.0486657	FAM74A7	FALSE	chr9	42198999	+	NA
8163107	0.0553173	1844	0.990921	-0.0857279	MIR32	FALSE	chr9	109046298	-	NA
8137183	0.055344	1845	0.990921	0.0327964	SSPO	FALSE	chr7	149776041	+	rs354033
7892681	0.0553585	1846	0.990921	-0.054734	NA	FALSE	NA	NA	NA	NA
8040614	0.0553586	1847	0.990921	-0.0519941	RN7SL856P	FALSE	chr2	25058031	+	rs4665719
8159642	0.0553601	1848	0.990921	-0.0382827	TUBB4B	FALSE	chr9	137241212	+	NA
7933872	0.0553682	1849	0.990921	0.197379	EGR2	FALSE	chr10	62816355; 62816366; 62819167; 62919900	-	NA
8147650	0.0554699	1850	0.990921	-0.095779	NA	FALSE	NA	NA	NA	NA
8059222	0.0554788	1851	0.990921	-0.0267357	DNPEP	TRUE	chr2	219388015	-	NA
8125434	0.0554937	1852	0.990921	0.0685203	HLA-DRB9	FALSE	NA	NA	NA	NA
8166824	0.0555505	1853	0.990921	-0.0542219	NA	FALSE	NA	NA	NA	NA
8026217	0.0555657	1854	0.990921	-0.0273022	CC2D1A	FALSE	chr19	13906200	+	NA
8089596	0.0556178	1855	0.990921	0.0791204	WDR52	FALSE	NA	NA	NA	NA
7896624	0.0557457	1856	0.990921	-0.0534256	NA	FALSE	NA	NA	NA	NA
8005048	0.0557478	1857	0.990921	-0.0534252	MYOCD	FALSE	chr17	12665988	+	NA
8167726	0.0558203	1858	0.990921	-0.0640436	RNA5SP504	FALSE	NA	NA	NA	NA
7941401	0.0558558	1859	0.990921	-0.0345007	OVOL1	FALSE	chr11	65787021; 65790128; 65793708	+	NA
7896388	0.0558565	1860	0.990921	-0.0471091	NA	FALSE	NA	NA	NA	NA
7893180	0.0558782	1861	0.990921	-0.0732444	NA	FALSE	NA	NA	NA	NA
8009366	0.0559444	1862	0.990921	0.0383082	NOL11	FALSE	chr17	67717832	+	NA
8085954	0.0560192	1863	0.990921	0.0357094	AZI2	FALSE	chr3	28349050	-	rs170934; rs1813375; rs669607
7895075	0.0560496	1864	0.990921	-0.118205	NA	FALSE	NA	NA	NA	NA
7965108	0.0560877	1865	0.990921	-0.0533532	NA	FALSE	NA	NA	NA	NA
8064514	0.0561248	1866	0.990921	0.0546698	ZNF343	FALSE	chr20	2493030; 2508901; 2508915; 2509132; 2509132; 2524522; 2524522; 2524702	-	NA
7970973	0.0561415	1867	0.990921	-0.0731688	NA	FALSE	NA	NA	NA	NA
7937476	0.0561664	1868	0.990921	-0.0272363	RPLP2	FALSE	chr11	809646	+	NA
8035566	0.0562034	1869	0.990921	-0.0422208	HOMER3	FALSE	chr19	18940352	-	NA
7895578	0.0562404	1870	0.990921	-0.0430702	NA	FALSE	NA	NA	NA	NA
7992845	0.0563454	1871	0.990921	-0.0344333	ZNF205	FALSE	chr16	3112572	+	NA
8069553	0.0563791	1872	0.990921	-0.0470115	NRIP1	FALSE	chr21	15064805	-	NA
8097449	0.0564	1873	0.990921	0.0396348	PCDH10	FALSE	chr4	133149314	+	NA
7898350	0.0564647	1874	0.990921	-0.038114	LOC102724970	FALSE	NA	NA	NA	NA
7912884	0.0564647	1875	0.990921	-0.038114	LOC102724970	FALSE	NA	NA	NA	NA
8156519	0.0564701	1876	0.990921	-0.0469946	MIRLET7A1	FALSE	chr9	94175951	+	NA
7894316	0.0564729	1877	0.990921	-0.0344438	NA	FALSE	NA	NA	NA	NA
8074925	0.0564807	1878	0.990921	-0.0465958	GUSBP2	FALSE	NA	NA	NA	NA
7896192	0.0565048	1879	0.990921	-0.0344394	NA	FALSE	NA	NA	NA	NA
8161615	0.0565967	1880	0.990921	-0.042155	PRKACG	FALSE	chr9	69014113	-	NA
7894562	0.0566216	1881	0.990921	-0.128109	NA	FALSE	NA	NA	NA	NA
7895702	0.0566288	1882	0.990921	0.146928	NA	FALSE	NA	NA	NA	NA
7896508	0.0566877	1883	0.990921	-0.0421398	NA	FALSE	NA	NA	NA	NA
8151296	0.0566905	1884	0.990921	0.0545412	LACTB2	FALSE	chr8	70669157	-	NA
8170531	0.0567497	1885	0.990921	-0.0502209	MAGEA4	FALSE	NA	NA	NA	NA
8078310	0.0567909	1886	0.990921	-0.0729838	RNU1-96P	FALSE	chr3	27513870	+	rs11129295; rs2371108
8045148	0.0568112	1887	0.990921	0.0787231	MZT2A	FALSE	chr2	131491971; 131492335; 131492376; 131492387; 131492422; 131492743	-	NA
8055284	0.0568112	1888	0.990921	0.0787231	MZT2A	FALSE	chr2	131491971; 131492335; 131492376; 131492387; 131492422; 131492743	-	NA
8000409	0.0568911	1889	0.990921	0.0439568	HMGN2	FALSE	chr1	26472518	+	NA
7969228	0.0569058	1890	0.990921	0.0355791	ALG11	FALSE	chr13	52012413	+	NA
7939996	0.0569068	1891	0.990921	-0.0450313	OR9G3P	FALSE	NA	NA	NA	NA
7909503	0.0569193	1892	0.990921	0.0487845	SERTAD4	FALSE	chr1	210232798	+	NA
8113130	0.0569198	1893	0.990921	-0.0327434	MCTP1	FALSE	chr5	95081482	-	NA
7895770	0.0569552	1894	0.990921	-0.0516665	NA	FALSE	NA	NA	NA	NA
8066820	0.0569572	1895	0.990921	-0.0677752	RNU6-563P	FALSE	chr20	47493085	-	NA
7908591	0.0570056	1896	0.990921	-0.0516563	NA	FALSE	NA	NA	NA	NA
7936089	0.0570475	1897	0.990921	0.0606397	RNU11-3P	FALSE	chr10	103312568	-	NA
7895608	0.0570499	1898	0.990921	0.146661	NA	FALSE	NA	NA	NA	NA
7922229	0.0570816	1899	0.990921	-0.0407121	SELE	FALSE	chr1	169734062	-	NA
8142540	0.0570825	1900	0.990921	0.0395236	FAM3C	FALSE	chr7	121396334; 121351541; 121396364; 121396308; 121364552	-	NA
7929988	0.0571104	1901	0.990921	-0.0367243	HPS6	FALSE	chr10	102065389	+	NA
8092455	0.0571108	1902	0.990921	-0.0531388	NA	FALSE	NA	NA	NA	NA
7925755	0.0571318	1903	0.990921	0.0606185	OR2T11	FALSE	chr1	248627128	-	NA
7894330	0.0571796	1904	0.990921	-0.16374	NA	FALSE	NA	NA	NA	NA
8037355	0.0571828	1905	0.990921	0.0487315	ZNF428	FALSE	chr19	43619874	-	NA
8044263	0.0571867	1906	0.990921	0.0448331	RANBP2	FALSE	chr2	108719480	+	NA
8159111	0.0572093	1907	0.990921	0.0355349	WDR5	FALSE	chr9	134135364; 134135376; 134136087	+	NA
8103975	0.0572417	1908	0.990921	-0.0951268	SLED1	FALSE	NA	NA	NA	NA
8088986	0.0572824	1909	0.990921	0.0605807	POU1F1	FALSE	chr3	87276587	-	NA
7926609	0.0572904	1910	0.990921	0.0355231	COMMD3-BMI1	FALSE	chr10	22316408	+	NA
8114977	0.0573701	1911	0.990921	0.0486939	HTR4	FALSE	chr5	148637020	-	NA
8020919	0.0573796	1912	0.990921	0.0438686	C18orf21	FALSE	chr18	35972082; 35972624; 35972624; 35972633; 35972680; 35972681; 35972712; 35972784	+	NA
7908988	0.0573957	1913	0.990921	-0.0627973	SNRPE	FALSE	chr1	203861614	+	NA
7962197	0.0574285	1914	0.990921	0.0560474	RNU6-1069P	FALSE	chr12	31803090	-	NA
7932881	0.0574867	1915	0.990921	0.0451579	LOC100129307	FALSE	NA	NA	NA	NA
7896309	0.0574998	1916	0.990921	-0.110971	NA	FALSE	NA	NA	NA	NA
8041212	0.0575466	1917	0.990921	0.0543486	LCLAT1	FALSE	chr2	30447248; 30447387; 30447255; 30447225; 30447235; 30447402; 30447275; 30447242; 30447272; 30447245; 30447235; 30447256	+	NA
8028613	0.0576014	1918	0.990921	0.0355079	IFNL1	FALSE	chr19	39296324	+	NA
8079719	0.0576159	1919	0.990921	-0.0419861	CCDC36	FALSE	chr3	49199499	+	NA
8126931	0.0577049	1920	0.990921	-0.0481979	DEFB133	FALSE	chr6	49949444	-	NA
7894687	0.0577821	1921	0.990921	0.0324691	NA	FALSE	NA	NA	NA	NA
7896460	0.057816	1922	0.990921	0.328442	NA	FALSE	NA	NA	NA	NA
8012843	0.0578234	1923	0.990921	-0.0342604	ZNF18	FALSE	chr17	11997372	-	NA
8083447	0.057841	1924	0.990921	0.0437859	P2RY1	FALSE	chr3	152834692	+	NA
8102608	0.0578869	1925	0.990921	-0.0419416	QRFPR	FALSE	chr4	121381059	-	NA
7979387	0.0578872	1926	0.990921	0.0437777	SLC35F4	FALSE	chr14	57866062	-	NA
7935692	0.0578999	1927	0.990921	0.0437754	ERLIN1	FALSE	chr10	100186029; 100186033; 100188334	-	NA
8034084	0.057959	1928	0.990921	0.0422879	AP1M2	FALSE	chr19	10587314	-	rs2288904; rs34536443; rs8112449
7896512	0.0580043	1929	0.990921	-0.0342083	NA	FALSE	NA	NA	NA	NA
7894893	0.0580357	1930	0.990921	-0.18773	NA	FALSE	NA	NA	NA	NA
8150489	0.0580446	1931	0.990921	-0.0726313	RN7SL149P	FALSE	chr8	41840339	-	NA
7893477	0.058069	1932	0.990921	-0.0448268	NA	FALSE	NA	NA	NA	NA
8066025	0.0581797	1933	0.990921	-0.0541309	RNU6-1166P	FALSE	NA	NA	NA	NA
7924230	0.0581984	1934	0.990921	0.0379556	ABHD17A	FALSE	chr19	1885547	-	NA
8113981	0.0582003	1935	0.990921	0.0437219	P4HA2	FALSE	chr5	132227242	-	NA
7896642	0.0582338	1936	0.990921	-0.0625941	NA	FALSE	NA	NA	NA	NA
8137228	0.058278	1937	0.990921	-0.0328871	ZNF775	FALSE	chr7	150379334	+	NA
7909064	0.0582886	1938	0.990921	-0.0341703	CNTN2	FALSE	chr1	205043196	+	NA
8042466	0.058321	1939	0.990921	-0.0668315	NA	FALSE	NA	NA	NA	NA
8168045	0.0583853	1940	0.990921	-0.0341574	EFNB1	FALSE	NA	NA	NA	NA
8006083	0.0584025	1941	0.990921	-0.049898	NA	FALSE	NA	NA	NA	NA
8149264	0.0584899	1942	0.990921	0.0484717	PPP1R3B	FALSE	chr8	9151574	-	NA
7965200	0.0584907	1943	0.990921	0.0484715	CCDC59	FALSE	chr12	82358788	-	NA
7972981	0.0585223	1944	0.990921	0.0353458	OR11H1	FALSE	chr22	15528157	+	NA
8074194	0.0585223	1945	0.990921	0.0353458	OR11H1	FALSE	chr22	15528157	+	NA
8086538	0.0585634	1946	0.990921	-0.13394	LIMD1-AS1	FALSE	chr3	45689134	-	NA
7895601	0.0585668	1947	0.990921	-0.043762	NA	FALSE	NA	NA	NA	NA
8116033	0.0585839	1948	0.990921	-0.0341309	F12	FALSE	chr5	177409576	-	rs4075958; rs4976646
7894747	0.0586465	1949	0.990921	-0.0437485	NA	FALSE	NA	NA	NA	NA
8008132	0.0587205	1950	0.990921	0.0323462	ATP5G1	TRUE	chr17	48892764	+	NA
8094688	0.0587223	1951	0.990921	-0.0429993	LIAS	FALSE	chr4	39459071	+	NA
8000906	0.0587533	1952	0.990921	0.0392558	ZNF764	FALSE	chr16	30558498	-	rs7204270
8018082	0.0587685	1953	0.990921	-0.0417981	SLC39A11	FALSE	chr17	73092688	-	NA
8139810	0.0587719	1954	0.990921	-0.0633132	NA	FALSE	NA	NA	NA	NA
7895262	0.0587927	1955	0.990921	0.137607	NA	FALSE	NA	NA	NA	NA
7975521	0.0587945	1956	0.990921	0.0335952	RBM25	FALSE	chr14	73058435	+	NA
8128565	0.0588277	1957	0.990921	0.0488378	POPDC3	FALSE	chr6	105179860	-	NA
8102678	0.0588317	1958	0.990921	0.0335901	TRPC3	FALSE	chr4	121951754	-	NA
7952557	0.0588443	1959	0.990921	-0.0225264	SRPR	FALSE	chr11	126268982	-	NA
7947270	0.0588668	1960	0.990921	-0.0417822	KCNA4	FALSE	chr11	30017023	-	NA
7895150	0.0589373	1961	0.990921	-0.187127	NA	FALSE	NA	NA	NA	NA
8035765	0.0589399	1962	0.990921	0.0977977	ZNF14	FALSE	chr19	19733097	-	NA
7893949	0.0589484	1963	0.990921	-0.049793	NA	FALSE	NA	NA	NA	NA
7968962	0.0589609	1964	0.990921	0.0601653	LRRC63	FALSE	chr13	46211942	+	NA
8086880	0.0589844	1965	0.990921	-0.0377392	CDC25A	FALSE	chr3	48188356	-	NA
7996608	0.0590041	1966	0.990921	0.0352773	RLTPR	FALSE	chr16	67644918	+	NA
8147040	0.0590074	1967	0.990921	-0.0404072	ZBTB10	FALSE	chr8	80486212	+	NA
7994572	0.0590551	1968	0.990921	-0.0845045	SNX29P2	FALSE	NA	NA	NA	NA
8055680	0.0590784	1969	0.990921	0.0720689	RNU6-601P	FALSE	chr2	149610774	-	NA
8053288	0.0590924	1970	0.990921	0.0448642	GCFC2	FALSE	chr2	75665941; 75670214; 75687892; 75694479; 75701372; 75710606; 75710892; 75710899; 75710941; 75710985; 75710989	-	NA
7918504	0.0591185	1971	0.990921	0.0523662	OVGP1	FALSE	chr1	111427777	-	NA
7991453	0.0591898	1972	0.990921	-0.0340507	FAM174B	FALSE	chr15	92655958	-	NA
8145822	0.0592109	1973	0.990921	-0.0569002	RNA5SP264	FALSE	chr8	36764444	+	NA
7952522	0.059293	1974	0.990921	0.0539632	PUS3	FALSE	chr11	125903221	-	NA
7955719	0.0592994	1975	0.990921	-0.0312624	HIGD1AP1	FALSE	NA	NA	NA	NA
7931387	0.0593666	1976	0.990921	0.0483002	NA	FALSE	NA	NA	NA	NA
8124327	0.0593974	1977	0.990921	-0.0943549	NA	FALSE	NA	NA	NA	NA
8155376	0.0594246	1978	0.990921	-0.0340475	FAM74A4	FALSE	NA	NA	NA	NA
7969933	0.0595126	1979	0.990921	-0.102272	BIVM	FALSE	chr13	102799048; 102799048; 102800400; 102801493; 102807543; 102820386	+	NA
7969794	0.0595637	1980	0.990921	-0.0888769	LOC100132099	FALSE	NA	NA	NA	NA
8076225	0.0595647	1981	0.990921	-0.0324064	RPS19BP1	FALSE	chr22	39532855	-	NA
8137637	0.0595874	1982	0.990921	-0.0533758	NA	FALSE	NA	NA	NA	NA
8091696	0.059589	1983	0.990921	-0.0464276	RN7SKP46	FALSE	chr3	157930725	-	NA
7951133	0.0596028	1984	0.990921	0.0455741	MAML2	FALSE	chr11	96343180	-	NA
8003903	0.0596445	1985	0.990921	-0.0224564	ARRB2	FALSE	chr17	4710692	+	NA
8054837	0.0596936	1986	0.990921	0.0599871	C2orf76	FALSE	chr2	119366742	-	NA
7971513	0.0597275	1987	0.990921	-0.0340077	ESD	FALSE	chr13	46797232	-	NA
8084215	0.0597312	1988	0.990921	-0.0511145	LINC00888	FALSE	NA	NA	NA	NA
7921076	0.0597329	1989	0.990921	0.04866	GPATCH4	FALSE	chr1	156601470	-	NA
7934255	0.0597464	1990	0.990921	-0.0416409	MICU1	FALSE	chr10	72508625; 72523936; 72523953; 72523975; 72551198; 72626074; 72626078; 72626105; 72626111; 72626131; 72626191	-	NA
8038407	0.0597509	1991	0.990921	0.0522329	RRAS	FALSE	chr19	49640201	-	rs2303759; rs8107548
8131719	0.0597791	1992	0.990921	-0.0323796	DNAH11	FALSE	chr7	21543214	+	NA
8156547	0.0598156	1993	0.990921	-0.056566	RNU6-669P	FALSE	chr9	94507737	+	NA
8054077	0.0598455	1994	0.990921	-0.0376141	ACTR1B	FALSE	chr2	97664107	-	NA
7940358	0.0598504	1995	0.990921	-0.0376134	ZP1	FALSE	chr11	60870511	+	rs34383631; rs650258
8072353	0.0598532	1996	0.990921	-0.0445192	LOC646513	FALSE	NA	NA	NA	NA
8027139	0.0598821	1997	0.990921	0.0321964	RFXANK	FALSE	chr19	19192242	+	NA
7974447	0.0598853	1998	0.990921	0.0455225	SOCS4	FALSE	chr14	55027229	+	NA
8005814	0.059949	1999	0.990921	0.0343906	NLK	FALSE	chr17	28042155	+	NA
[truncated: 31,298 more rows]

## Sheet: NK cells, all
Transcript Cluster ID	p Value	Rank	False Discovery Rate	est. % diff in expression	Gene Name	Control Gene	Chromosome(s)	Hg38 Transcription Start Site(s)	Hg38 Strand	MS Risk SNPs within 500kb
8072274	5.01371e-06	1	0.166941	-0.0586051	UQCR10	FALSE	chr22	29767373	+	NA
7896555	1.66902e-05	2	0.252138	-0.295026	NA	FALSE	NA	NA	NA	NA
7894881	4.23229e-05	3	0.252138	0.061714	NA	FALSE	NA	NA	NA	NA
7894862	4.50506e-05	4	0.252138	0.0684427	NA	FALSE	NA	NA	NA	NA
7895644	4.5096e-05	5	0.252138	0.0598813	NA	FALSE	NA	NA	NA	NA
7893409	4.85693e-05	6	0.252138	0.0575441	NA	FALSE	NA	NA	NA	NA
8002312	5.30067e-05	7	0.252138	0.0885911	NOB1	FALSE	chr16	69754940	-	NA
8162214	7.84898e-05	8	0.326684	-0.0821153	SPATA31C1	FALSE	NA	NA	NA	NA
7972180	0.000100749	9	0.337015	0.0880396	RNF219	FALSE	chr13	78659179	-	NA
7892601	0.000104968	10	0.337015	0.0526633	NA	FALSE	NA	NA	NA	NA
8156257	0.000121185	11	0.337015	-0.0800167	SPATA31C1	FALSE	NA	NA	NA	NA
8056361	0.000121458	12	0.337015	-0.130182	RNA5SP111	FALSE	chr2	164895777	-	NA
7896573	0.000146467	13	0.344268	0.0536853	NA	FALSE	NA	NA	NA	NA
8095422	0.000156742	14	0.344268	-0.115961	STATH	FALSE	chr4	69995965	+	NA
8177277	0.000160268	15	0.344268	-0.273833	RBMY1J	FALSE	NA	NA	NA	NA
7892916	0.00016711	16	0.344268	0.0661004	NA	FALSE	NA	NA	NA	NA
7896637	0.000175768	17	0.344268	0.0627643	NA	FALSE	NA	NA	NA	NA
8089230	0.000203951	18	0.34505	0.0839229	NA	FALSE	NA	NA	NA	NA
7893026	0.000239523	19	0.34505	0.0599534	NA	FALSE	NA	NA	NA	NA
7894935	0.000244818	20	0.34505	0.360085	NA	FALSE	NA	NA	NA	NA
8021185	0.000245277	21	0.34505	-0.114684	RNA5SP458	FALSE	chr18	50319001	+	NA
7894838	0.000251168	22	0.34505	0.103305	NA	FALSE	NA	NA	NA	NA
7896667	0.000258923	23	0.34505	0.0516018	NA	FALSE	NA	NA	NA	NA
8048205	0.000265421	24	0.34505	0.0904641	IGFBP2	FALSE	chr2	216633394	+	NA
8125919	0.000268565	25	0.34505	0.292398	FKBP5	FALSE	chr6	35728583	-	NA
7953243	0.000269433	26	0.34505	-0.0670486	NDUFA9	FALSE	chr12	4649106	+	NA
7894480	0.000286285	27	0.353053	0.0639388	NA	FALSE	NA	NA	NA	NA
8146377	0.000328491	28	0.390635	-0.111565	RNU6-519P	FALSE	chr8	47979413	+	NA
8074836	0.000341162	29	0.391713	-0.0789295	PRAMENP	FALSE	NA	NA	NA	NA
7925128	0.00035417	30	0.393093	0.0854494	NA	FALSE	NA	NA	NA	NA
7896347	0.000380793	31	0.407778	-0.136134	NA	FALSE	NA	NA	NA	NA
7900426	0.000399582	32	0.407778	0.109137	SMAP2	FALSE	chr1	40374647	+	NA
7938154	0.000404141	33	0.407778	-0.0651684	ILK	TRUE	chr11	6603815	+	NA
7895973	0.000417447	34	0.408816	0.0575299	NA	FALSE	NA	NA	NA	NA
8066776	0.000434449	35	0.409652	0.0766834	TP53RK	FALSE	chr20	46689779	-	NA
7945942	0.000442907	36	0.409652	-0.174802	RNU6-1143P	FALSE	chr11	3714875	-	NA
7893892	0.000505355	37	0.451973	-0.0726855	NA	FALSE	NA	NA	NA	NA
8100097	0.000554499	38	0.451973	-0.096089	GABRG1	FALSE	chr4	46124081	-	NA
8139198	0.000560337	39	0.451973	-0.0658802	RWDD4	FALSE	chr4	183659225	-	NA
7962829	0.000607415	40	0.451973	-0.131684	SNORA2B	FALSE	chr12	48667593	-	NA
8178346	0.00060763	41	0.451973	-0.0566278	GNL1	FALSE	chr6	30557174	-	NA
7894132	0.000618561	42	0.451973	0.0699605	NA	FALSE	NA	NA	NA	NA
8104613	0.0006248	43	0.451973	-0.0771074	NA	FALSE	NA	NA	NA	NA
7892797	0.00063322	44	0.451973	0.129961	NA	FALSE	NA	NA	NA	NA
8179648	0.000649336	45	0.451973	-0.056338	GNL1	FALSE	chr6	30557174	-	NA
8073943	0.000655275	46	0.451973	0.112221	ZBED4	FALSE	chr22	49853841	+	NA
8075483	0.000677067	47	0.451973	0.119513	PIK3IP1	FALSE	chr22	31292534	-	NA
8136938	0.000677122	48	0.451973	-0.181157	RNU6-162P	FALSE	chr7	143574745	+	NA
8143599	0.000677122	49	0.451973	-0.181157	RNU6-162P	FALSE	chr7	143574745	+	NA
8116086	0.000684875	50	0.451973	0.0911964	DOK3	FALSE	chr5	177510385	-	rs4075958; rs4976646
8089261	0.000692344	51	0.451973	0.0738465	CBLB	FALSE	chr3	105702201; 105869043; 105673993; 105682130; 105869043; 105869043; 105869422; 105869422; 105869552	-	rs2028597
7982052	0.00072933	52	0.451973	-0.0867241	SNORD115-23	FALSE	chr15	25211795	+	NA
7893348	0.00073634	53	0.451973	0.0651628	NA	FALSE	NA	NA	NA	NA
7948910	0.000765724	54	0.451973	0.211265	SNORD25	FALSE	chr11	62855632	-	NA
8124742	0.000766882	55	0.451973	-0.0556053	GNL1	FALSE	chr6	30557174	-	NA
8149289	0.00078862	56	0.451973	0.0829765	SOX7	FALSE	chr8	10730512	-	NA
7932832	0.000793276	57	0.451973	-0.0994237	RNU6-598P	FALSE	chr10	30299673	-	NA
8128001	0.000799055	58	0.451973	0.0965826	CGA	FALSE	chr6	87095406	-	NA
7895923	0.000800865	59	0.451973	0.0659507	NA	FALSE	NA	NA	NA	NA
8103881	0.000847134	60	0.470117	-0.0615918	RWDD4	FALSE	chr4	183659225	-	NA
8086600	0.000904048	61	0.493477	0.199022	CCR1	FALSE	chr3	46208396	-	NA
8049552	0.000924275	62	0.496381	-0.113272	RBM44	FALSE	chr2	237798388	+	NA
8034482	0.000965817	63	0.50857	0.0636623	TNPO2	FALSE	chr19	12724011	-	NA
8032034	0.000977519	64	0.50857	0.0716911	C2CD4C	FALSE	chr19	409170	-	NA
7915902	0.00114143	65	0.577345	-0.151574	CYP4A11	FALSE	chr1	46941465; 46941484; 46941456; 46941464; 46941484; 46941484; 46941476; 46941464; 46934246	-	NA
8152213	0.00115602	66	0.577345	-0.0680788	RNU6-1224P	FALSE	chr8	102533339	-	NA
8082585	0.00118985	67	0.577345	-0.0904745	COL6A5	FALSE	chr3	130345515; 130345515; 130431462; 130440509; 130443483	+	NA
7903389	0.00119225	68	0.577345	-0.118619	NA	FALSE	NA	NA	NA	NA
8114468	0.00119641	69	0.577345	-0.141141	SNORD63	FALSE	chr5	138561110	-	NA
8024511	0.00128057	70	0.602989	0.0699681	ZNF554	FALSE	chr19	2819873	+	NA
8037835	0.00130544	71	0.602989	0.153844	SLC1A5	FALSE	chr19	46787342	-	NA
8129693	0.00132367	72	0.602989	-0.101162	NA	FALSE	NA	NA	NA	NA
7908382	0.00133625	73	0.602989	-0.0971775	RGS21	FALSE	chr1	192316991	+	rs1323292; rs1359062; rs2760524
7955852	0.0013401	74	0.602989	0.0781399	HOXC12	FALSE	chr12	53954833	+	NA
7895983	0.00137515	75	0.610512	-0.139529	NA	FALSE	NA	NA	NA	NA
8038954	0.00141252	76	0.618849	0.104764	ZNF616	FALSE	chr19	52139917	-	NA
7942091	0.00147938	77	0.626243	0.077418	TPCN2	FALSE	chr11	69048896	+	NA
8165046	0.00148828	78	0.626243	-0.0703291	CAMSAP1	FALSE	chr9	135907224	-	NA
7906786	0.00149247	79	0.626243	-0.0887389	FCRLA	FALSE	chr1	161706971	+	NA
8111197	0.00150462	80	0.626243	-0.165381	RNU6-660P	FALSE	chr5	16941951	-	NA
7926345	0.00155782	81	0.640378	0.0710557	RPP38	FALSE	chr10	15097179	+	NA
8139767	0.0015789	82	0.641129	0.249099	RNU6-1052P	FALSE	chr7	56402173	-	NA
8111991	0.00160108	83	0.642302	-0.0995156	RNU6-381P	FALSE	chr5	44066731	-	NA
7894892	0.00172055	84	0.659765	0.0469144	NA	FALSE	NA	NA	NA	NA
8085970	0.00174211	85	0.659765	-0.107408	NA	FALSE	NA	NA	NA	NA
8103378	0.00175983	86	0.659765	-0.0772513	ASIC5	FALSE	chr4	155866273	-	NA
7908966	0.00175998	87	0.659765	-0.107311	LINC00260	FALSE	NA	NA	NA	NA
7961275	0.00182459	88	0.659765	-0.156749	TAS2R13	FALSE	chr12	10909562	-	NA
8060772	0.00185168	89	0.659765	-0.0481479	CDS2	FALSE	chr20	5126785	+	NA
7950294	0.00185867	90	0.659765	0.0698535	COA4	FALSE	chr11	73876988	-	NA
8012663	0.00188823	91	0.659765	-0.0800529	MYH8	FALSE	chr17	10421950	-	NA
8124262	0.00189798	92	0.659765	0.0755758	TDP2	FALSE	chr6	24667033	-	NA
8121257	0.00190491	93	0.659765	0.128584	PRDM1	FALSE	chr6	106086319	+	NA
7912552	0.00190498	94	0.659765	-0.105075	HNRNPCL1	FALSE	chr1	12848725	-	NA
8071196	0.00192256	95	0.659765	0.0950006	TSSK2	FALSE	chr22	19130807	+	NA
8058052	0.00192696	96	0.659765	0.0696059	HSPD1	FALSE	chr2	197500047	-	NA
7940253	0.0019603	97	0.659765	-0.0921155	MS4A6E	FALSE	chr11	60334830	+	NA
7995523	0.00196053	98	0.659765	-0.227098	NA	FALSE	NA	NA	NA	NA
8174644	0.00196164	99	0.659765	-0.0816054	RN7SL712P	FALSE	NA	NA	NA	NA
7895941	0.00209229	100	0.694005	0.1682	NA	FALSE	NA	NA	NA	NA
8119842	0.00211804	101	0.694005	0.0689539	POLR1C	FALSE	chr6	43517021	+	NA
8051793	0.00212597	102	0.694005	0.0730622	OXER1	FALSE	chr2	42764261	-	rs12466022; rs2163226; rs6718520
7894647	0.00215018	103	0.695094	-0.0293843	NA	FALSE	NA	NA	NA	NA
7894592	0.00220395	104	0.69597	0.053434	NA	FALSE	NA	NA	NA	NA
7993019	0.00221373	105	0.69597	0.0536732	NUDT16L1	FALSE	chr16	4693693; 4693702; 4693706; 4693717; 4693760	+	NA
8140869	0.0022156	106	0.69597	-0.0966392	LRRD1	FALSE	chr7	92165276	-	NA
7992460	0.00227622	107	0.708329	0.0661842	NPW	FALSE	chr16	2019519	+	NA
8027279	0.00233515	108	0.719941	0.0805513	ZNF430	FALSE	chr19	21020619; 21020633; 21020649; 21020656; 21020716; 21057804	+	NA
8063369	0.00244741	109	0.747627	-0.0502149	RNF114	FALSE	chr20	49936347	+	rs17785991
8067201	0.00252081	110	0.76305	-0.143014	NA	FALSE	NA	NA	NA	NA
7952986	0.00255468	111	0.766336	-0.103701	WNK1	FALSE	chr12	752922	+	NA
8055643	0.00261723	112	0.778088	-0.151756	RNU6-715P	FALSE	chr2	147495540	-	NA
7951422	0.00269034	113	0.792747	0.0713153	MSANTD4	FALSE	chr11	106022227	-	NA
8178897	0.00276218	114	0.799759	0.142511	COL11A2	FALSE	chr6	33192454	-	NA
8180105	0.00276218	115	0.799759	0.142511	COL11A2	FALSE	chr6	33192454	-	NA
7906061	0.00281785	116	0.808845	-0.0698375	SYT11	FALSE	chr1	155859508	+	NA
8004266	0.00290187	117	0.825842	0.0853284	SLC16A13	FALSE	chr17	7036074	+	NA
7938544	0.00299125	118	0.844064	-0.0604401	TEAD1	FALSE	chr11	12674590	+	NA
8062691	0.00302305	119	0.845871	-0.0783016	NA	FALSE	chr20	43304554	+	NA
7971218	0.00311214	120	0.849503	0.0846868	KBTBD7	FALSE	chr13	41194566	-	NA
7969574	0.00317841	121	0.849503	-0.108576	KRT18	FALSE	chr12	52948963	+	NA
8133856	0.0032063	122	0.849503	-0.0932582	RNU6-337P	FALSE	chr7	79030239	+	NA
7992302	0.00327033	123	0.849503	0.0576294	CRAMP1L	FALSE	chr16	1614639	+	NA
7966876	0.00336645	124	0.849503	-0.0757161	NA	FALSE	chr12	118888564	-	NA
7949637	0.00337354	125	0.849503	0.0596152	MRPL11	FALSE	chr11	66438848	-	NA
8046997	0.00338107	126	0.849503	0.0695884	ASNSD1	FALSE	chr2	189661419	+	NA
7893603	0.00342503	127	0.849503	0.0719745	NA	FALSE	NA	NA	NA	NA
8144874	0.00343479	128	0.849503	-0.0663342	NSAP11	FALSE	NA	NA	NA	NA
8051814	0.00343883	129	0.849503	0.0780925	ZFP36L2	FALSE	chr2	43226609	-	rs12466022; rs2163226; rs6718520
8169432	0.00344576	130	0.849503	-0.0872487	ZCCHC16	FALSE	NA	NA	NA	NA
8060395	0.00345115	131	0.849503	-0.0872348	RAD21L1	FALSE	chr20	1226119	+	NA
8030212	0.00345146	132	0.849503	0.0594666	LIN7B	FALSE	chr19	49114360	+	rs2303759; rs8107548
7920875	0.00345594	133	0.849503	-0.12204	SCARNA4	FALSE	chr1	155926086	-	NA
8073842	0.00346586	134	0.849503	-0.0662729	TTC38	FALSE	chr22	46267963	+	NA
7895732	0.00346942	135	0.849503	0.0633032	NA	FALSE	NA	NA	NA	NA
7950731	0.0034791	136	0.849503	0.0594146	PRCP	FALSE	chr11	82900597	-	NA
8091595	0.00349527	137	0.849503	-0.0648391	FLJ46120	FALSE	NA	NA	NA	NA
8047503	0.00353746	138	0.84963	-0.137029	NA	FALSE	NA	NA	NA	NA
8111512	0.00354682	139	0.84963	-0.086992	UGT3A1	FALSE	chr5	36001028	-	rs6881706; rs6897932
8083656	0.00360045	140	0.850215	0.0691076	MFSD1	FALSE	chr3	158732197; 158732356; 158747576; 158801864; 158801925; 158801925; 158802050; 158802056; 158802090; 158802136; 158802155; 158802378; 158802485; 158804230; 158809001; 158809236; 158819546; 158822442; 158823193	+	NA
8139832	0.00361786	141	0.850215	0.101475	ZNF117	FALSE	chr7	64991036	-	NA
8060274	0.0036514	142	0.850215	-0.0482269	THAP4	FALSE	chr2	241617501	-	NA
8077250	0.0036514	143	0.850215	-0.0482269	THAP4	FALSE	chr2	241617501	-	NA
7965249	0.00371394	144	0.853035	-0.0999427	C12orf50	FALSE	chr12	88029412	-	NA
7999423	0.00373799	145	0.853035	0.171837	SOCS1	FALSE	chr16	11256179	-	rs12708716; rs12927355; rs4780346; rs6498184; rs7191700; rs7200786
7928308	0.00374037	146	0.853035	0.171824	DDIT4	FALSE	chr10	72273919	+	NA
7960709	0.00385447	147	0.868277	0.0503674	SPSB2	FALSE	chr12	6873285	-	rs12296430
7893649	0.00386083	148	0.868277	0.0806755	NA	FALSE	NA	NA	NA	NA
7952116	0.0038962	149	0.868277	-0.0525476	BCL9L	FALSE	chr11	118910904	-	rs523604; rs533646
8050993	0.00397371	150	0.868277	-0.0761413	CIB4	FALSE	chr2	26641368	-	NA
7892568	0.00398103	151	0.868277	0.0585312	NA	FALSE	NA	NA	NA	NA
7928959	0.00400141	152	0.868277	0.0563595	PTEN	FALSE	chr10	87863112	+	NA
8063970	0.00401778	153	0.868277	0.0503804	COL9A3	FALSE	chr20	62817061	+	NA
8057554	0.00406293	154	0.868277	-0.0551748	CACYBP	FALSE	chr1	174999162	+	NA
8036436	0.00421752	155	0.868277	0.092089	ZNF607	FALSE	chr19	37719188	-	NA
8161648	0.00423033	156	0.868277	0.0762912	KLF9	FALSE	chr9	70414624	-	NA
8103023	0.00429136	157	0.868277	0.0797066	NA	FALSE	NA	NA	NA	NA
7950370	0.00430358	158	0.868277	-0.101345	RNA5SP343	FALSE	chr11	74198854	-	NA
7953715	0.00431642	159	0.868277	-0.0529199	NECAP1	FALSE	chr12	8082210	+	NA
8137537	0.00435983	160	0.868277	0.0579296	EN2	FALSE	chr7	155458128	+	NA
8078603	0.00439219	161	0.868277	-0.1107	RNA5SP129	FALSE	chr3	37341648	+	NA
8108376	0.00439906	162	0.868277	-0.0886808	NA	FALSE	NA	NA	NA	NA
7946121	0.00439983	163	0.868277	-0.0753213	OR52L2P	FALSE	NA	NA	NA	NA
8081488	0.00440988	164	0.868277	-0.0850341	HHLA2	FALSE	chr3	108296489	+	NA
8027260	0.00441603	165	0.868277	0.0751439	ZNF486	FALSE	chr19	20167273	+	NA
7921076	0.00445619	166	0.868277	0.0674579	GPATCH4	FALSE	chr1	156601470	-	NA
8000906	0.00450956	167	0.868277	0.0635626	ZNF764	FALSE	chr16	30558498	-	rs7204270
8139695	0.00451068	168	0.868277	-0.0965671	NA	FALSE	chr7	52269569	-	NA
8016607	0.00452328	169	0.868277	-0.0899972	RNU6-1313P	FALSE	chr17	49966176	-	NA
7895180	0.00455197	170	0.868277	-0.0664542	NA	FALSE	NA	NA	NA	NA
7907396	0.00456603	171	0.868277	-0.0750207	C1orf105	FALSE	chr1	172420687; 172420733; 172445138; 172451040; 172452892	+	NA
7961287	0.00457961	172	0.868277	-0.143635	TAS2R19	FALSE	chr12	11022620	-	NA
7976554	0.00460732	173	0.868277	-0.0695717	LOC100133207	FALSE	NA	NA	NA	NA
7997767	0.00463319	174	0.868277	0.0809665	ZFPM1	FALSE	chr16	88453316	+	NA
8058604	0.00464639	175	0.868277	-0.0845578	MYL1	FALSE	chr2	210315190	-	NA
8057034	0.00466731	176	0.868277	-0.0595397	PRKRA	FALSE	chr2	178450757	-	NA
8018935	0.00469451	177	0.868277	-0.104306	RNU6-638P	FALSE	chr17	78696797	-	NA
7982252	0.00470255	178	0.868277	-0.148718	DKFZP434L187	FALSE	chr15	30196035	+	NA
7892664	0.00470672	179	0.868277	-0.153134	NA	FALSE	NA	NA	NA	NA
8094872	0.00473496	180	0.868277	-0.0693646	RN7SL193P	FALSE	chr4	43863273	+	NA
7970595	0.004743	181	0.868277	-0.148585	C1QTNF9B	FALSE	chr13	23897006	-	NA
7896859	0.00474596	182	0.868277	-0.0594305	MIR200B	FALSE	chr1	1167091	+	NA
8081997	0.00480711	183	0.870896	-0.0640053	FBXO40	FALSE	chr3	121593118	+	rs1920296; rs2255214; rs9282641
8130406	0.00484182	184	0.870896	-0.0745429	NA	FALSE	NA	NA	NA	NA
8174361	0.00484335	185	0.870896	0.0980991	TSC22D3	FALSE	NA	NA	NA	NA
8151384	0.00488495	186	0.870896	-0.0522063	STAU2	FALSE	chr8	73746840	-	NA
8172406	0.00491215	187	0.870896	-0.084048	SSX3	FALSE	NA	NA	NA	NA
8154973	0.0049427	188	0.870896	-0.0645682	C9orf131	FALSE	chr9	35041149; 35041141; 35042471; 35042212; 35041094; 35041094; 35042207	+	NA
8138596	0.00494337	189	0.870896	0.0570903	CLK2P	FALSE	NA	NA	NA	NA
7896206	0.00504765	190	0.882178	-0.166403	NA	FALSE	NA	NA	NA	NA
7893325	0.00506979	191	0.882178	-0.117283	NA	FALSE	NA	NA	NA	NA
8029615	0.00508689	192	0.882178	-0.0966701	RNU6-611P	FALSE	chr19	45047457	+	NA
7895472	0.00514842	193	0.883941	0.0547417	NA	FALSE	NA	NA	NA	NA
7983648	0.00515015	194	0.883941	-0.123116	RNA5SP394	FALSE	chr15	49982442	+	NA
8142446	0.0051878	195	0.885837	-0.103183	NA	FALSE	NA	NA	NA	NA
8075798	0.00530133	196	0.892834	-0.0267343	EIF3D	TRUE	chr22	36529436	-	NA
7892679	0.00530916	197	0.892834	0.249105	NA	FALSE	NA	NA	NA	NA
7967032	0.00531258	198	0.892834	0.104809	RNU6-1088P	FALSE	chr12	120313341	-	NA
8106784	0.00533603	199	0.892834	0.0683974	RASA1	FALSE	chr5	87267887	+	NA
7971197	0.00539364	200	0.897578	0.037504	ELF1	FALSE	chr13	40982225	-	NA
8178289	0.00543549	201	0.897578	-0.0831122	OR12D3	FALSE	chr6	29375291	-	NA
8020086	0.00544526	202	0.897578	-0.108166	NA	FALSE	NA	NA	NA	NA
8088864	0.00550992	203	0.898264	-0.0734794	NA	FALSE	NA	NA	NA	NA
8157945	0.00554379	204	0.898264	0.0563161	ZBTB34	FALSE	chr9	126879347	+	NA
7896283	0.00557097	205	0.898264	0.698929	NA	FALSE	NA	NA	NA	NA
8014264	0.00558029	206	0.898264	0.090355	PEX12	FALSE	chr17	35578637	-	NA
8021416	0.00559658	207	0.898264	-0.0943184	MIR122	FALSE	chr18	58451067	+	rs7238078
8086899	0.00561388	208	0.898264	0.0598868	NME6	FALSE	chr3	48301358	-	NA
7952426	0.00564053	209	0.898264	0.0484299	VSIG2	FALSE	chr11	124752238	-	NA
8123976	0.00566524	210	0.898264	0.0655638	GFOD1	FALSE	chr6	13486183	-	NA
8150592	0.005854	211	0.91811	0.103562	CEBPD	FALSE	chr8	47739086	-	NA
7943025	0.00587871	212	0.91811	0.0733633	TRIM49D2P	FALSE	chr11	89924063	+	NA
7950971	0.00587871	213	0.91811	0.0733633	TRIM49D2P	FALSE	chr11	89924063	+	NA
8013965	0.00590742	214	0.91811	0.061551	SSH2	FALSE	chr17	29930093	-	NA
7917548	0.00593954	215	0.91811	-0.0624982	GBP7	FALSE	chr1	89176040	-	NA
8180312	0.00597848	216	0.91811	-0.0456688	NA	FALSE	NA	NA	NA	NA
7892958	0.00601711	217	0.91811	0.324128	NA	FALSE	NA	NA	NA	NA
7895328	0.00605529	218	0.91811	-0.0710542	NA	FALSE	NA	NA	NA	NA
7936762	0.00605854	219	0.91811	-0.045598	ATE1	FALSE	chr10	121928063	-	NA
8078958	0.00607742	220	0.91811	-0.0820685	RN7SL411P	FALSE	chr3	40209004	+	NA
7895405	0.00610172	221	0.91811	-0.0680566	NA	FALSE	NA	NA	NA	NA
7988245	0.00615239	222	0.91811	0.0612441	MFAP1	FALSE	chr15	43824802	-	NA
8109503	0.00615922	223	0.91811	-0.114789	RNU6-556P	FALSE	chr5	156814129	+	NA
8056020	0.00617643	224	0.91811	-0.0576835	RNU6-932P	FALSE	chr2	157985894	-	NA
7896440	0.00627127	225	0.926653	-0.162567	NA	FALSE	NA	NA	NA	NA
7895500	0.00638397	226	0.926653	-0.203016	NA	FALSE	NA	NA	NA	NA
7929026	0.00639743	227	0.926653	-0.086591	ACTA2-AS1	FALSE	chr10	88932642	+	NA
8050591	0.00639825	228	0.926653	-0.055653	NDUFAF2	FALSE	chr5	60945128	+	NA
7938756	0.00642779	229	0.926653	0.0553048	ST13P5	FALSE	NA	NA	NA	NA
8078248	0.00643466	230	0.926653	0.0268361	HMGB1	TRUE	chr13	30465965	-	NA
8075332	0.00645371	231	0.926653	0.0522565	TBC1D10A	FALSE	chr22	30326901	-	NA
8100941	0.00645654	232	0.926653	-0.138394	NA	FALSE	NA	NA	NA	NA
8024306	0.00660067	233	0.939338	0.0551219	APC2	FALSE	chr19	1450148	+	NA
7931216	0.00660134	234	0.939338	0.0531097	FAM175B	FALSE	chr10	124801784	+	NA
7892558	0.00673411	235	0.93961	0.230102	NA	FALSE	NA	NA	NA	NA
8048257	0.0067495	236	0.93961	0.0473732	PNKD	FALSE	chr2	218270391	+	NA
7893315	0.006759	237	0.93961	0.210043	NA	FALSE	NA	NA	NA	NA
8005097	0.00679956	238	0.93961	0.106607	HS3ST3B1	FALSE	chr17	14301082	+	NA
8020930	0.00685968	239	0.93961	-0.0502009	ELP2	FALSE	chr18	36129897	+	NA
8084971	0.00686044	240	0.93961	-0.0449316	SENP5	FALSE	chr3	196867855	+	NA
7975595	0.00687065	241	0.93961	0.0528436	C14orf169	FALSE	chr14	73490963	+	NA
8151561	0.00687235	242	0.93961	0.0604021	ZFAND1	FALSE	chr8	81721300	-	NA
7956044	0.00688142	243	0.93961	0.0662813	RNU1-69P	FALSE	chr12	55874677	+	NA
8157888	0.00688545	244	0.93961	-0.0934141	NA	FALSE	NA	NA	NA	NA
7962869	0.00695832	245	0.945678	0.047192	DDX23	FALSE	chr12	48852163	-	NA
7997642	0.00709837	246	0.950234	0.101053	CRISPLD2	FALSE	chr16	84819983	+	NA
8096873	0.00712314	247	0.950234	-0.0805619	RNU6-205P	FALSE	chr4	110278184	+	NA
8031511	0.00715405	248	0.950234	0.0446084	ZNF524	FALSE	chr19	55600368	+	NA
7928545	0.0071598	249	0.950234	-0.0805128	DLG5-AS1	FALSE	chr10	77927371; 77927630	+	NA
8039017	0.00716636	250	0.950234	0.0818512	ZNF816	FALSE	chr19	52962861	-	NA
8139606	0.00717923	251	0.950234	-0.0696473	SUN3	FALSE	chr7	48029098	-	NA
8027884	0.00727999	252	0.950234	0.0873739	NA	FALSE	NA	NA	NA	NA
7973056	0.0073459	253	0.950234	0.0514097	APEX1	FALSE	chr14	20455218; 20455244; 20455226; 20455226; 20455225; 20455225; 20455246; 20455264; 20455247; 20455214; 20456006; 20455256; 20455200; 20455238; 20455225; 20455239; 20455194; 20455225; 20455246; 20455190	+	NA
7894782	0.00741278	254	0.950234	0.126587	NA	FALSE	NA	NA	NA	NA
8033674	0.00742268	255	0.950234	-0.048834	MUC16	FALSE	chr19	8981342	-	NA
7908161	0.00743512	256	0.950234	-0.0658564	C1orf21	FALSE	chr1	184387057	+	NA
7989883	0.00756631	257	0.950234	-0.0988294	NA	FALSE	NA	NA	NA	NA
7983841	0.00758513	258	0.950234	-0.0799582	NA	FALSE	NA	NA	NA	NA
8174979	0.00759169	259	0.950234	-0.0691799	ACTRT1	FALSE	NA	NA	NA	NA
7940103	0.00761051	260	0.950234	-0.0833418	OR9Q1	FALSE	chr11	58023880	+	NA
7975045	0.00765565	261	0.950234	0.0653793	MTHFD1	FALSE	chr14	64388349	+	NA
7895925	0.00770668	262	0.950234	0.396925	NA	FALSE	NA	NA	NA	NA
7978093	0.00772213	263	0.950234	0.0520604	JPH4	FALSE	chr14	23578800	-	NA
8028323	0.00773548	264	0.950234	-0.0921323	NA	FALSE	NA	NA	NA	NA
7945232	0.00778768	265	0.950234	-0.0605177	ADAMTS15	FALSE	chr11	130448973	+	NA
7896387	0.00781653	266	0.950234	0.0584157	NA	FALSE	NA	NA	NA	NA
8168900	0.00788362	267	0.950234	-0.0542711	NXF2B	FALSE	NA	NA	NA	NA
8003125	0.00792275	268	0.950234	0.0518872	TAF1C	FALSE	chr16	84187039	-	NA
7892682	0.00793058	269	0.950234	0.311757	NA	FALSE	NA	NA	NA	NA
7894828	0.00794683	270	0.950234	-0.198157	NA	FALSE	NA	NA	NA	NA
7943317	0.00798993	271	0.950234	-0.0843373	RNA5SP347	FALSE	chr11	97657463	+	NA
8021603	0.00802901	272	0.950234	-0.079408	SERPINB13	FALSE	chr18	63587365	+	NA
8112615	0.00809633	273	0.950234	-0.170058	ENC1	FALSE	chr5	74641424	-	NA
8097066	0.00814272	274	0.950234	0.0462488	METTL14	FALSE	chr4	118685367	+	NA
7984569	0.00814584	275	0.950234	-0.0685862	LRRC49	FALSE	chr15	70892625	+	NA
8027074	0.00822058	276	0.950234	0.0516373	UPF1	FALSE	chr19	18831937	+	NA
8122971	0.0082234	277	0.950234	-0.0441499	ARID1B	FALSE	chr6	156777928	+	NA
8052331	0.00823108	278	0.950234	0.100644	PNPT1	FALSE	chr2	55693910	-	NA
7932177	0.0082348	279	0.950234	0.0695621	CDNF	FALSE	chr10	14838072	-	NA
7994269	0.00829964	280	0.950234	0.0589458	KDM8	FALSE	chr16	27203974	+	NA
7896085	0.00832212	281	0.950234	-0.0913185	NA	FALSE	NA	NA	NA	NA
8170024	0.00833229	282	0.950234	0.0701631	LINC00086	FALSE	NA	NA	NA	NA
8146069	0.00837471	283	0.950234	-0.0789979	ADAM18	FALSE	chr8	39584584	+	NA
8068353	0.00843741	284	0.950234	-0.0682881	SLC5A3	FALSE	chr21	34073569	+	NA
7955043	0.00846731	285	0.950234	-0.11522	RN7SL246P	FALSE	chr12	45874034	+	NA
8090664	0.00848363	286	0.950234	0.0800541	ASTE1	FALSE	chr3	131026792	-	NA
7904361	0.00851171	287	0.950234	-0.147142	FAM46C	FALSE	chr1	117605933	+	NA
7934066	0.00856804	288	0.950234	-0.133914	NA	FALSE	NA	NA	NA	NA
8158446	0.00857032	289	0.950234	-0.0313766	NUP188	FALSE	chr9	128947698	+	NA
7978644	0.00860323	290	0.950234	0.0691578	NFKBIA	TRUE	chr14	35404746	-	NA
8075406	0.00860384	291	0.950234	0.0513275	PES1	FALSE	chr22	30591858	-	NA
8023481	0.00860586	292	0.950234	0.0459134	NARS	FALSE	chr18	57622173	-	NA
8043129	0.0086324	293	0.950234	-0.0896349	RNU6-674P	FALSE	chr2	85204925	+	NA
8149646	0.00864522	294	0.950234	0.0512948	NUDT18	FALSE	chr8	22109397	-	NA
8170097	0.00865362	295	0.950234	-0.0487861	SLC9A6	FALSE	NA	NA	NA	NA
8143749	0.00867757	296	0.950234	0.0643075	ZNF467	FALSE	chr7	149773479	-	rs354033
8113705	0.00868947	297	0.950234	-0.11024	RNU6-718P	FALSE	chr5	120337653	-	NA
8056047	0.0087062	298	0.950234	0.0983466	WDSUB1	FALSE	chr2	159286799	-	NA
7949019	0.00871719	299	0.950234	-0.197438	RNU6-1306P	FALSE	chr11	63882685	-	rs694739
8117077	0.00874698	300	0.950234	-0.102357	RNU6-190P	FALSE	chr6	17619532	+	NA
7894783	0.00876901	301	0.950234	-0.168474	NA	FALSE	NA	NA	NA	NA
8094701	0.0087801	302	0.950234	0.0661324	LOC401127	FALSE	NA	NA	NA	NA
7950764	0.00884174	303	0.950234	-0.0552236	DLG2	FALSE	chr11	85627270	-	NA
8065537	0.00887105	304	0.950234	0.185147	LOC100134868	FALSE	NA	NA	NA	NA
8126371	0.00887668	305	0.950234	0.0390144	CCND3	TRUE	chr6	41941519	-	NA
7907370	0.00890111	306	0.950234	-0.0678322	DNM3	FALSE	chr1	171841499	+	NA
8153823	0.00893159	307	0.950234	0.0554922	CYHR1	FALSE	chr8	144465648	-	NA
7964484	0.008987	308	0.950234	-0.050297	B4GALNT1	FALSE	chr12	57633202	-	rs12368653; rs201202118; rs703842
8063478	0.00899113	309	0.950234	0.0529575	FAM210B	FALSE	chr20	56358914	+	NA
7973797	0.00899617	310	0.950234	-0.0551024	COCH	FALSE	chr14	30874542	+	NA
8132915	0.00905478	311	0.950234	-0.109683	RNU6-1126P	FALSE	chr7	55789367	+	NA
8085749	0.00907457	312	0.950234	-0.0692312	PP2D1	FALSE	chr3	20012330	-	NA
7945045	0.00907678	313	0.950234	-0.0648626	DDX25	FALSE	chr11	125904362	+	NA
8012138	0.00911329	314	0.950234	-0.114188	NA	FALSE	NA	NA	NA	NA
8100768	0.00911997	315	0.950234	-0.0532877	UGT2B11	FALSE	chr4	69214731	-	NA
8120600	0.00913519	316	0.950234	-0.0965837	RNU6-411P	FALSE	chr6	71182611	+	NA
8124645	0.00914016	317	0.950234	-0.0771168	OR12D3	FALSE	chr6	29375291	-	NA
7893471	0.00918694	318	0.950234	0.201261	NA	FALSE	NA	NA	NA	NA
7917468	0.00918715	319	0.950234	-0.167541	RNA5SP52	FALSE	chr1	87453373	-	NA
8165462	0.00923428	320	0.950234	0.0452613	ANAPC2	FALSE	chr9	137188537	-	NA
7894374	0.00924075	321	0.950234	-0.0592358	NA	FALSE	NA	NA	NA	NA
8101828	0.00924423	322	0.950234	0.106734	TSPAN5	FALSE	chr4	98658629	-	NA
8165156	0.00930224	323	0.950234	0.0615159	SDCCAG3	FALSE	chr9	136410527	-	NA
7975292	0.0093095	324	0.950234	-0.0579452	RAD51B	FALSE	chr14	67819778	+	NA
8043512	0.00932758	325	0.950234	0.0636835	ZNF2	FALSE	chr2	95165431	+	NA
8163481	0.00933125	326	0.950234	-0.0820572	CDC26	FALSE	chr9	113275589	-	NA
7895818	0.00935532	327	0.950234	0.0893608	NA	FALSE	NA	NA	NA	NA
8162086	0.00937916	328	0.950234	-0.0500225	AGTPBP1	FALSE	chr9	85742029	-	NA
7895255	0.00938905	329	0.950234	-0.155158	NA	FALSE	NA	NA	NA	NA
8080894	0.00943107	330	0.951595	-0.0886494	RNU6-739P	FALSE	chr3	64511754	+	NA
8005475	0.00956714	331	0.962409	0.0634634	TRIM16L	FALSE	chr17	18722022	+	NA
8148772	0.00964681	332	0.966585	0.0449944	HGH1	FALSE	chr8	144137768	+	NA
7894245	0.00978505	333	0.966585	-0.16627	NA	FALSE	NA	NA	NA	NA
8028389	0.00981838	334	0.966585	0.0576262	SPRED3	FALSE	chr19	38390199	+	NA
8092957	0.00987688	335	0.966585	-0.0844578	NA	FALSE	NA	NA	NA	NA
8005749	0.00987873	336	0.966585	0.068562	NA	FALSE	NA	NA	NA	NA
7898627	0.00988252	337	0.966585	-0.0544402	VWA5B1	FALSE	chr1	20290918	+	NA
8063522	0.00988767	338	0.966585	-0.12221	NA	FALSE	NA	NA	NA	NA
8160769	0.00989663	339	0.966585	-0.0544301	RNA5SP282	FALSE	chr9	34206241	-	NA
7934244	0.00993451	340	0.966585	0.057533	DNAJB12	FALSE	chr10	72355149	-	NA
7895479	0.00996208	341	0.966585	-0.136529	NA	FALSE	NA	NA	NA	NA
7913558	0.0099872	342	0.966585	-0.0478946	LUZP1	FALSE	chr1	23168858; 23177808; 23168817; 23168845; 23133679	-	NA
8142580	0.010019	343	0.966585	0.0574658	FEZF1	FALSE	chr7	122304505	-	NA
8148040	0.010069	344	0.966585	0.0715481	MAL2	FALSE	chr8	119208370	+	NA
8171032	0.0100697	345	0.966585	-0.0725273	TMLHE-AS1	FALSE	NA	NA	NA	NA
8176243	0.0100697	346	0.966585	-0.0725273	TMLHE-AS1	FALSE	NA	NA	NA	NA
7915045	0.0101235	347	0.966585	0.0608057	C1orf109	FALSE	chr1	37690520	-	NA
7981566	0.0102054	348	0.966585	0.0731866	NUDT14	FALSE	chr14	105181303	-	NA
8124459	0.0102578	349	0.966585	0.0713629	ZNF322	FALSE	chr6	26659752	-	NA
8072482	0.0102601	350	0.966585	0.150718	RNA5SP496	FALSE	chr22	31305403	+	NA
7997321	0.0102687	351	0.966585	0.0520065	MON1B	FALSE	chr16	77190918	+	NA
8035980	0.0102744	352	0.966585	0.0834001	RHPN2	FALSE	chr19	33064888	-	NA
8087746	0.0103194	353	0.966585	0.0833487	ZNF652P1	FALSE	NA	NA	NA	NA
8022488	0.0103506	354	0.966585	-0.0590686	ABHD3	FALSE	chr18	21704805	-	NA
8020666	0.0103701	355	0.966585	-0.0968905	NA	FALSE	NA	NA	NA	NA
8081786	0.0103957	356	0.966585	0.0571724	QTRTD1	FALSE	chr3	114056734	+	NA
8055087	0.0104125	357	0.966585	0.0959316	NA	FALSE	NA	NA	NA	NA
8131583	0.0104257	358	0.966585	0.0627133	BZW2	FALSE	chr7	16646133	+	NA
8157036	0.0104547	359	0.966585	-0.0664441	RN7SKP191	FALSE	chr9	105096755	+	NA
7961962	0.0104563	360	0.966585	-0.0949422	NA	FALSE	NA	NA	NA	NA
8059996	0.0104912	361	0.966585	0.0570995	PER2	FALSE	chr2	238288609	-	NA
7992043	0.0105086	362	0.966585	0.0499509	FAM173A	FALSE	chr16	721141	+	rs2744148
7914665	0.0106953	363	0.977695	0.0775389	RN7SKP16	FALSE	chr1	33336864	-	NA
7952394	0.0107266	364	0.977695	0.088447	OR8D2	FALSE	chr11	124320197	-	NA
8009351	0.0107333	365	0.977695	-0.111857	NA	FALSE	chr17	67271468	+	NA
8170241	0.0108245	366	0.977695	-0.0811631	SPANXB1	FALSE	NA	NA	NA	NA
8170244	0.0108245	367	0.977695	-0.0811631	SPANXB1	FALSE	NA	NA	NA	NA
7979925	0.0108323	368	0.977695	-0.135098	ADAM20P1	FALSE	chr14	70483756	-	NA
7970096	0.0108398	369	0.977695	0.0497348	ING1	FALSE	chr13	110712735; 110713277; 110713459; 110714981; 110715436	+	NA
8174149	0.0108643	370	0.977695	-0.0537654	NXF2B	FALSE	NA	NA	NA	NA
7948109	0.0110449	371	0.987516	-0.0674904	OR5I1	FALSE	chr11	55936400	-	NA
8074106	0.0110705	372	0.987516	0.0514626	KLHDC7B	FALSE	chr22	50548032	+	rs470119
8055406	0.0111255	373	0.987516	-0.0659004	LCT	FALSE	chr2	135837180	-	NA
8038309	0.0111291	374	0.987516	0.0705463	KCNA7	FALSE	chr19	49072941	-	rs2303759; rs8107548
7947129	0.0111495	375	0.987516	0.0566127	DBX1	FALSE	chr11	20160613	-	NA
8084878	0.0111607	376	0.987516	-0.112349	NA	FALSE	NA	NA	NA	NA
7959014	0.0111942	377	0.987516	-0.152821	RNU6-1188P	FALSE	chr12	116082569	+	NA
7893726	0.0112411	378	0.987516	-0.0940515	NA	FALSE	NA	NA	NA	NA
8155200	0.0112961	379	0.987516	-0.0990831	CCIN	FALSE	chr9	36169393	+	NA
7952046	0.0113066	380	0.987516	0.082272	MPZL2	FALSE	chr11	118264536	-	rs533646
7893691	0.0113201	381	0.987516	-0.163291	NA	FALSE	NA	NA	NA	NA
7901052	0.011333	382	0.987516	0.103693	SNORD38B	FALSE	chr1	44778389	+	NA
8050873	0.0113589	383	0.987516	0.0822173	NA	FALSE	NA	NA	NA	NA
8169000	0.0114369	384	0.987847	-0.134161	NA	FALSE	NA	NA	NA	NA
7981748	0.011442	385	0.987847	-0.0582864	RNU6-978P	FALSE	chr15	19883613	+	NA
8138686	0.011459	386	0.987847	-0.0656407	KIAA0087	FALSE	chr7	26538788	-	rs706015
7895980	0.0115363	387	0.987847	0.348172	NA	FALSE	NA	NA	NA	NA
8149250	0.0116132	388	0.987847	0.05964	SGK223	FALSE	chr8	8381747	-	NA
8010629	0.0116292	389	0.987847	0.056274	CCDC137	FALSE	chr17	81666363	+	NA
7963863	0.0116412	390	0.987847	-0.106223	OR10U1P	FALSE	NA	NA	NA	NA
8117700	0.0117144	391	0.987847	-0.0654463	GPX5	FALSE	chr6	28525924	+	NA
8043187	0.01176	392	0.987847	0.0491639	MAT2A	FALSE	chr2	85539164	+	NA
8139790	0.0117696	393	0.987847	-0.106069	NA	FALSE	NA	NA	NA	NA
8017150	0.0118194	394	0.987847	0.0661704	TUBD1	FALSE	chr17	59892945; 59892945; 59892715; 59892920; 59892858; 59891003; 59891003; 59892893; 59892941; 59881148; 59892893; 59878762; 59892899; 59892935; 59892943; 59892935	-	rs180515; rs8070345
7988410	0.0118796	395	0.987847	-0.079515	NA	FALSE	NA	NA	NA	NA
7908525	0.0118983	396	0.987847	0.0542399	C1orf53	FALSE	chr1	197902646	+	NA
8052056	0.0120649	397	0.987847	-0.105722	RNU6-282P	FALSE	chr2	48502024	-	NA
7907271	0.0120716	398	0.987847	-0.0753533	FMO2	FALSE	chr1	171185207	+	NA
8127662	0.0120852	399	0.987847	-0.0858303	RNU6-155P	FALSE	chr6	75768158	-	NA
7980358	0.0120933	400	0.987847	-0.0529927	POMT2	FALSE	chr14	77320884	-	NA
8004081	0.0121356	401	0.987847	0.0559297	ZFP3	FALSE	chr17	5078247	+	NA
7894866	0.0121482	402	0.987847	-0.0930872	NA	FALSE	NA	NA	NA	NA
7948864	0.0121505	403	0.987847	-0.0466508	STX5	FALSE	chr11	62832041	-	NA
8178291	0.0121562	404	0.987847	-0.0651186	OR11A1	FALSE	chr6	29427732	-	NA
8179591	0.0121562	405	0.987847	-0.0651186	OR11A1	FALSE	chr6	29427732	-	NA
8019798	0.012206	406	0.987847	0.0489014	MAFG	FALSE	chr17	81927714	-	NA
8149823	0.0122176	407	0.987847	-0.0792147	NA	FALSE	chr8	23806377	-	NA
7955979	0.0122609	408	0.987847	-0.0617545	OR9K1P	FALSE	NA	NA	NA	NA
8110106	0.0122768	409	0.987847	0.0712789	HRH2	FALSE	chr5	175658029	+	NA
8129560	0.0122945	410	0.987847	-0.0797967	CTAGE15	FALSE	chr7	143571800	+	NA
7894521	0.0123458	411	0.987847	-0.161489	NA	FALSE	NA	NA	NA	NA
8123949	0.0123517	412	0.987847	-0.0790975	RNU1-64P	FALSE	chr6	11503671	-	NA
8051998	0.0123649	413	0.987847	0.0591019	MCFD2	FALSE	chr2	46909072; 46914074; 46914118; 46915780; 46915789; 46915791; 46915810; 46915816; 46915868; 46916054; 46916112; 46941714; 46941727; 46941732; 46941773; 46941855; 46941855	-	NA
7900624	0.012424	414	0.987847	0.0603967	ZNF691	FALSE	chr1	42846636	+	NA
8129067	0.0124653	415	0.987847	-0.070497	RNA5SP213	FALSE	chr6	114220786	-	NA
8038913	0.012474	416	0.987847	0.0590262	ZNF649	FALSE	chr19	51905011	-	NA
8129456	0.0124823	417	0.987847	-0.0648833	NA	FALSE	NA	NA	NA	NA
8142538	0.0124913	418	0.987847	-0.105232	RNU6-517P	FALSE	chr7	121195057	-	NA
7895740	0.0125048	419	0.987847	-0.0796131	NA	FALSE	NA	NA	NA	NA
7983761	0.0125057	420	0.987847	-0.0892415	NA	FALSE	NA	NA	NA	NA
7970082	0.0125485	421	0.987847	0.0864549	NA	FALSE	NA	NA	NA	NA
8114898	0.0125999	422	0.987847	-0.0853476	PPP2R2B	FALSE	chr5	146878642	-	NA
7976160	0.0126713	423	0.987847	-0.0463807	TDP1	FALSE	chr14	89955937	+	NA
7896149	0.0127009	424	0.987847	0.0602022	NA	FALSE	NA	NA	NA	NA
8016552	0.0127409	425	0.987847	0.0527981	PHB	FALSE	chr17	49414858	-	NA
8055194	0.0127574	426	0.987847	0.094591	TUBA3E	FALSE	chr2	130198461	-	NA
8107613	0.0128063	427	0.987847	0.0601292	SNX2	FALSE	chr5	122775202	+	NA
8177222	0.012815	428	0.987847	-0.160708	CD24	FALSE	chr6	106975627	-	NA
8112306	0.0128325	429	0.987847	-0.074728	LOC57399	FALSE	NA	NA	NA	NA
8154100	0.0128504	430	0.987847	-0.109236	VLDLR	FALSE	chr9	2622099	+	NA
8078319	0.0129385	431	0.987847	-0.0645631	ZCWPW2	FALSE	chr3	28349148	+	rs170934; rs1813375; rs669607
7936242	0.0129567	432	0.987847	-0.0645506	ITPRIP	FALSE	chr10	104328924	-	NA
7965976	0.0129704	433	0.987847	-0.0524823	KRT18P20	FALSE	NA	NA	NA	NA
7924967	0.0129855	434	0.987847	0.162155	RNU4-21P	FALSE	chr1	229535189	-	NA
8078832	0.0129948	435	0.987847	-0.109072	RNU6-1227P	FALSE	chr3	39025986	+	NA
7951034	0.0130262	436	0.987847	-0.119142	SNORA8	FALSE	chr11	93732499	-	NA
8096077	0.0130825	437	0.987847	-0.0849103	RNU6-499P	FALSE	chr4	82174546	+	NA
8016077	0.0131225	438	0.987847	0.0552942	GPATCH8	FALSE	chr17	44465935; 44436787; 44503401; 44503404; 44503391; 44503389; 44445922; 44503403; 44503403; 44503430; 44503406	-	NA
8042168	0.0131452	439	0.987847	-0.0744803	KIAA1841	FALSE	chr2	61065932	+	rs842639
7894998	0.0131494	440	0.987847	0.0430675	NA	FALSE	NA	NA	NA	NA
8139911	0.0132148	441	0.987847	-0.0783692	NA	FALSE	NA	NA	NA	NA
8031784	0.0132746	442	0.987847	0.0803562	ZNF134	FALSE	chr19	57614250	+	NA
8106702	0.0133264	443	0.987847	0.0618217	ZCCHC9	FALSE	chr5	81301602	+	NA
7895734	0.0133304	444	0.987847	-0.109727	NA	FALSE	NA	NA	NA	NA
8109401	0.0133387	445	0.987847	0.0939606	RN7SL177P	FALSE	chr5	153755381	+	NA
8159379	0.013348	446	0.987847	0.0650003	TMEM141	FALSE	chr9	136791354	+	NA
7896249	0.0133491	447	0.987847	0.0482659	NA	FALSE	NA	NA	NA	NA
7894108	0.0133537	448	0.987847	-0.118744	NA	FALSE	NA	NA	NA	NA
8146685	0.0134889	449	0.987847	0.055069	RRS1	FALSE	chr8	66429027	+	NA
7895454	0.0134994	450	0.987847	-0.131259	NA	FALSE	NA	NA	NA	NA
7927955	0.0135428	451	0.987847	0.0685516	KIAA1279	FALSE	NA	NA	NA	NA
8075910	0.0135478	452	0.987847	-0.0237112	RAC2	FALSE	chr22	37244270	-	NA
8020354	0.0135814	453	0.987847	-0.0741434	OR4K11P	FALSE	NA	NA	NA	NA
8117594	0.0136893	454	0.987847	-0.103931	HIST1H2BM	FALSE	chr6	27815043	+	NA
8025945	0.0137049	455	0.987847	0.0921402	ZNF441	FALSE	chr19	11767091	+	NA
7989493	0.0137162	456	0.987847	-0.0608004	RPS27L	FALSE	chr15	63157499	-	NA
7936091	0.0137356	457	0.987847	-0.0740266	USMG5	FALSE	chr10	103396441	-	NA
8163999	0.0137506	458	0.987847	0.0602514	ZBTB6	FALSE	chr9	122913330	-	NA
8016412	0.0137974	459	0.987847	-0.108184	RNU6-1201P	FALSE	chr17	48088784	-	rs4239162
8069987	0.0138578	460	0.987847	-0.0607124	TCP10L	FALSE	chr21	32585533	-	NA
8030964	0.0138757	461	0.987847	-0.0729507	ERVFRD-2	FALSE	NA	NA	NA	NA
7995994	0.0139519	462	0.987847	0.0529865	RSPRY1	FALSE	chr16	57186290	+	NA
8180323	0.0139704	463	0.987847	-0.0457474	NA	FALSE	NA	NA	NA	NA
8121312	0.0139801	464	0.987847	0.0797312	C6orf203	FALSE	chr6	107028212	+	NA
8069085	0.0140166	465	0.987847	0.068198	TRPM2	FALSE	chr21	44353255	+	NA
8127778	0.014022	466	0.987847	0.0529467	FAM46A	FALSE	chr6	81752708	-	NA
7925724	0.0140712	467	0.987847	-0.0652869	RNU6-691P	FALSE	NA	NA	NA	NA
8154725	0.0141888	468	0.987847	-0.0911289	KRT18	FALSE	chr12	52948963	+	NA
8096602	0.0141988	469	0.987847	0.106274	DAPP1	FALSE	chr4	99816845	+	NA
8004938	0.0141991	470	0.987847	-0.063727	NA	FALSE	NA	NA	NA	NA
8016257	0.0142104	471	0.987847	-0.0736738	RN7SL739P	FALSE	NA	NA	NA	NA
8042495	0.014227	472	0.987847	-0.0637092	SNRNP27	FALSE	chr2	69893559	+	NA
8051361	0.0142858	473	0.987847	-0.0558528	SRD5A2	FALSE	chr2	31581067	-	NA
8089438	0.0142881	474	0.987847	-0.0636704	DPPA2	FALSE	chr3	109316517	-	NA
8131044	0.0143025	475	0.987847	0.0477719	GET4	FALSE	chr7	876551	+	NA
8125007	0.0143232	476	0.987847	0.0598824	LY6G5C	FALSE	chr6	31680377	-	NA
7924203	0.0143322	477	0.987847	-0.0651169	RPL31P13	FALSE	NA	NA	NA	NA
8031714	0.0143403	478	0.987847	-0.0407826	ZNF460	FALSE	chr19	57280484	+	NA
7895673	0.0143473	479	0.987847	0.59701	NA	FALSE	NA	NA	NA	NA
8121743	0.0143692	480	0.987847	0.0742463	NA	FALSE	NA	NA	NA	NA
8016402	0.0144122	481	0.987847	0.054525	CBX1	FALSE	chr17	48101198	-	rs4239162
7919582	0.014454	482	0.987847	-0.0557593	NA	FALSE	NA	NA	NA	NA
7895829	0.0144845	483	0.987847	0.133053	NA	FALSE	NA	NA	NA	NA
7895783	0.0144882	484	0.987847	0.0927832	NA	FALSE	NA	NA	NA	NA
7937936	0.0145058	485	0.987847	-0.071572	OR52B3P	FALSE	NA	NA	NA	NA
7948741	0.0145188	486	0.987847	-0.0563895	B3GAT3	FALSE	chr11	62622175; 62622154; 62621984; 62621984; 62617454; 62622146	-	NA
8141328	0.0145259	487	0.987847	-0.0635209	CYP3A5	FALSE	chr7	99676576	-	NA
8141445	0.0145471	488	0.987847	0.042425	C7orf43	FALSE	chr7	100158685	-	NA
8146647	0.0145528	489	0.987847	-0.183956	NA	FALSE	NA	NA	NA	NA
8151436	0.0145901	490	0.987847	0.0641346	PEX2	FALSE	chr8	76986527; 77000226; 77000230; 77000267; 77000947; 77001044	-	NA
8007730	0.0146166	491	0.987847	0.0476155	ACBD4	FALSE	chr17	45132599	+	NA
8134869	0.014697	492	0.987847	-0.04705	PCOLCE	FALSE	chr7	100602176	+	NA
7970150	0.0147677	493	0.987847	-0.0607405	SPACA7	FALSE	chr13	112376318; 112376354; 112376387; 112382277	+	NA
7971511	0.0147787	494	0.987847	0.0790568	RNU2-6P	FALSE	chr13	46374590	-	NA
8157941	0.0148284	495	0.987847	0.0425095	ZBTB34	FALSE	chr9	126879347	+	NA
7945132	0.014833	496	0.987847	0.039376	FLI1	FALSE	chr11	128694091	+	NA
7918902	0.014881	497	0.987847	-0.0490574	CD58	FALSE	chr1	116571039	-	rs1335532; rs2300747; rs6677309
8157841	0.0148965	498	0.987847	-0.0731817	NA	FALSE	NA	NA	NA	NA
7893541	0.0149028	499	0.987847	0.226499	NA	FALSE	NA	NA	NA	NA
7964460	0.0149416	500	0.987847	-0.0632644	DDIT3	FALSE	chr12	57520492; 57520517; 57517743; 57520517; 57520511; 57520511; 57520511	-	rs12368653; rs201202118; rs703842
7951604	0.0150076	501	0.987847	-0.0731039	BTG4	FALSE	chr11	111512342	-	NA
8117628	0.0151197	502	0.987847	-0.0730258	OR1F12	FALSE	NA	NA	NA	NA
8073194	0.0151397	503	0.987847	-0.0646076	GRAP2	FALSE	chr22	39901081; 39926590; 39926602; 39926648; 39946816; 39966049; 39969374	+	NA
7978534	0.0152156	504	0.987847	-0.0831315	RNU6-602P	FALSE	chr14	31662143	-	NA
8080419	0.0152444	505	0.987847	0.0540606	GNL3	FALSE	chr3	52685919	+	NA
7914921	0.0153405	506	0.987847	-0.0684701	RNU4-27P	FALSE	chr1	36402859	-	NA
8042335	0.0153479	507	0.987847	-0.0376956	VDAC2	FALSE	chr10	75210847	+	NA
7982254	0.0153731	508	0.987847	-0.156835	NA	FALSE	NA	NA	NA	NA
7987110	0.0153731	509	0.987847	-0.156835	NA	FALSE	NA	NA	NA	NA
7933217	0.0154053	510	0.987847	-0.0728293	RNU6-1207P	FALSE	chr10	45188896	-	NA
8000890	0.0154512	511	0.987847	0.0489972	SEPHS2	FALSE	chr16	30446181	-	rs7204270
8069764	0.0154716	512	0.987847	-0.0841155	NA	FALSE	NA	NA	NA	NA
8178554	0.0154747	513	0.987847	0.0635572	LY6G5C	FALSE	chr6	31680377	-	NA
8004431	0.0155174	514	0.987847	-0.0315145	POLR2A	TRUE	chr17	7484378	+	NA
8094169	0.0155332	515	0.987847	-0.0511476	CPEB2	FALSE	chr4	15002673; 15002673; 15003897; 15003897; 15003935; 15003935; 15003935; 15007366; 15054132	+	NA
8016562	0.0155385	516	0.987847	0.0489548	SPOP	FALSE	chr17	49678110; 49678163; 49601631; 49678234; 49646630; 49602041; 49602398; 49611318; 49619304; 49678110; 49678085; 49678106; 49678055; 49678099; 49678025; 49678113; 49678003; 49646622; 49678005; 49678046; 49678110; 49678082	-	NA
7893395	0.0155541	517	0.987847	0.0687818	NA	FALSE	NA	NA	NA	NA
8144512	0.0155655	518	0.987847	-0.0840424	RNU6-682P	FALSE	chr8	8895812	+	NA
8015163	0.015573	519	0.987847	-0.0511284	KRTAP3-3	FALSE	chr17	40994133	-	NA
8019599	0.015573	520	0.987847	-0.0511284	KRTAP3-3	FALSE	chr17	40994133	-	NA
8152815	0.0156135	521	0.987847	-0.0643197	TMEM75	FALSE	chr8	127948723	-	rs2019960; rs4410871; rs759648
7895450	0.0156138	522	0.987847	-0.145244	NA	FALSE	NA	NA	NA	NA
8114787	0.0156764	523	0.987847	0.0772278	GNPDA1	FALSE	chr5	142013031	-	rs35952555
7894223	0.0156966	524	0.987847	-0.0466007	NA	FALSE	NA	NA	NA	NA
8020375	0.015779	525	0.987847	0.0827506	RNU6-1210P	FALSE	chr18	14759187	+	NA
8006602	0.0159116	526	0.987847	0.169402	CCL4	FALSE	chr17	36103589	+	NA
7894666	0.0159569	527	0.987847	-0.0401507	NA	FALSE	NA	NA	NA	NA
8097543	0.0160058	528	0.987847	0.0487311	ZNF330	FALSE	chr4	141220886; 141220886; 141220899; 141220910; 141220927; 141220929; 141220929; 141220933	+	NA
7970251	0.0160127	529	0.987847	-0.0626312	PROZ	FALSE	chr13	113158653	+	NA
8171180	0.0160285	530	0.987847	-0.046457	NA	FALSE	NA	NA	NA	NA
8171350	0.0160767	531	0.987847	0.0568097	LOC645769	FALSE	NA	NA	NA	NA
8046160	0.0161054	532	0.987847	-0.0640287	KLHL41	FALSE	chr2	169509701	+	NA
7917792	0.0161424	533	0.987847	-0.0943314	NA	FALSE	NA	NA	NA	NA
8121277	0.016155	534	0.987847	0.0898186	AIM1	FALSE	chr6	106511854	+	NA
8103986	0.0161624	535	0.987847	-0.0679518	LRP2BP	FALSE	chr4	185378998	-	NA
8145334	0.0161689	536	0.987847	-0.0599448	ADAM7	FALSE	chr8	24441025	+	NA
8107878	0.016241	537	0.987847	-0.0639498	IL3	FALSE	chr5	132060528	+	NA
8100532	0.0162847	538	0.987847	0.0419028	NOA1	FALSE	chr4	56978823	-	NA
7906784	0.0165131	539	0.987847	-0.0637933	NA	FALSE	NA	NA	NA	NA
7906950	0.0165228	540	0.987847	-0.0821458	NA	FALSE	NA	NA	NA	NA
7959986	0.0165421	541	0.987847	0.0484815	PUS1	FALSE	chr12	131929222	+	NA
8069827	0.0165464	542	0.987847	-0.0720745	KRTAP19-2	FALSE	chr21	30487436	-	NA
8122464	0.0166438	543	0.987847	-0.0311866	UTRN	FALSE	chr6	144291828	+	NA
8076851	0.0166935	544	0.987847	0.0415378	ALG12	FALSE	chr22	49918458	-	NA
7986838	0.0166986	545	0.987847	0.0775598	OCA2	FALSE	chr15	28099358	-	NA
7992038	0.0167097	546	0.987847	0.0466439	METRN	FALSE	chr16	715114	+	rs2744148
8172088	0.0167269	547	0.987847	-0.0461629	BCOR	FALSE	NA	NA	NA	NA
7910383	0.0167515	548	0.987847	-0.0763835	NA	FALSE	chr1	228652435	+	NA
7998931	0.0168123	549	0.987847	0.0564124	ZNF200	FALSE	chr16	3235360; 3235456; 3235457; 3235167; 3235186; 3227805; 3235070; 3234195; 3236221; 3236003	-	NA
8078284	0.0168209	550	0.987847	-0.106198	RNA5SP125	FALSE	chr3	25025006	+	NA
7979483	0.0168555	551	0.987847	-0.0621583	C14orf39	FALSE	chr14	60486096	-	NA
8028158	0.0168739	552	0.987847	0.0532129	OVOL3	FALSE	chr19	36111150; 36111202	+	NA
8159627	0.0169236	553	0.987847	0.0576266	SLC34A3	FALSE	chr9	137230756; 137230932	+	NA
8067899	0.016977	554	0.987847	-0.0718014	RNU6-1326P	FALSE	chr21	15614282	+	NA
8162472	0.0170555	555	0.987847	0.0413982	BARX1	FALSE	chr9	93953431	-	NA
7895108	0.0171014	556	0.987847	-0.166601	NA	FALSE	NA	NA	NA	NA
8176926	0.0171082	557	0.987847	-0.05042	CDY2B	FALSE	NA	NA	NA	NA
8177405	0.0171082	558	0.987847	-0.05042	CDY2B	FALSE	NA	NA	NA	NA
8084943	0.0171853	559	0.987847	0.0721996	UBXN7-AS1	FALSE	chr3	196431384	+	NA
8100758	0.017201	560	0.987847	-0.130727	UGT2B11	FALSE	chr4	69214731	-	NA
8108693	0.0172104	561	0.987847	-0.0828194	PCDHB4	FALSE	chr5	141121798	+	NA
7964795	0.0172535	562	0.987847	-0.0816239	IL26	FALSE	chr12	68225821	-	NA
8130401	0.0172633	563	0.987847	-0.0716231	RNA5SP224	FALSE	chr6	153159345	-	NA
7900076	0.0172763	564	0.987847	-0.0531824	TEKT2	FALSE	chr1	36084074	+	NA
8056151	0.0173001	565	0.987847	-0.0543071	PLA2R1	FALSE	chr2	160062610	-	NA
7896520	0.0173185	566	0.987847	0.0512492	NA	FALSE	NA	NA	NA	NA
8094154	0.0173897	567	0.987847	-0.0715452	OR7E35P	FALSE	NA	NA	NA	NA
7932550	0.0174123	568	0.987847	-0.0715313	NA	FALSE	NA	NA	NA	NA
8041445	0.0174144	569	0.987847	-0.130495	RNU6-1117P	FALSE	chr2	35471604	+	NA
8081138	0.0174772	570	0.987847	-0.0542238	EPHA6	FALSE	chr3	96814585	+	NA
8164496	0.0175212	571	0.987847	-0.0442475	CCBL1	FALSE	chr9	128835511; 128845408; 128846857; 128860532; 128881929; 128881945; 128882036; 128882053; 128882075; 128882494	-	NA
8164554	0.017594	572	0.987847	0.0462655	IER5L	FALSE	chr9	129178262	-	NA
8162191	0.017602	573	0.987847	-0.0915049	LOC392364	FALSE	NA	NA	NA	NA
7896095	0.0176349	574	0.987847	0.117903	NA	FALSE	NA	NA	NA	NA
7949373	0.0176423	575	0.987847	0.0572465	ZNHIT2	FALSE	chr11	65117708	-	NA
8148799	0.0176476	576	0.987847	0.0411755	HGH1	FALSE	chr8	144137768	+	NA
8080773	0.017651	577	0.987847	0.0502337	RPP14	FALSE	chr3	58306261	+	NA
7926728	0.0176698	578	0.987847	-0.0585952	MYO3A	FALSE	chr10	25934266	+	NA
8092220	0.0176991	579	0.987847	-0.0713565	RNU6-681P	FALSE	chr3	177126120	-	NA
7926127	0.0177132	580	0.987847	0.0332015	CELF2	FALSE	chr10	11165029	+	NA
7894588	0.0177361	581	0.987847	0.212328	NA	FALSE	NA	NA	NA	NA
7918153	0.017797	582	0.987847	0.0621706	NA	FALSE	NA	NA	NA	NA
8033605	0.0178063	583	0.987847	-0.0394931	MYO1F	FALSE	chr19	8577577	-	NA
8086706	0.0179448	584	0.987847	-0.0376757	SETD2	FALSE	chr3	47163967	-	NA
8021594	0.0179643	585	0.987847	-0.071197	SERPINB12	FALSE	chr18	63556159	+	NA
7909888	0.0179906	586	0.987847	-0.0749597	RNU6ATAC35P	FALSE	chr1	220825619	+	NA
7893663	0.0179996	587	0.987847	-0.12987	NA	FALSE	NA	NA	NA	NA
8128638	0.0180023	588	0.987847	0.0620559	SCML4	FALSE	chr6	107824317; 107732395; 107824312; 107732103; 107772251; 107824312; 107772251; 107824294; 107744054; 107824286; 107772251	-	NA
8171260	0.0180504	589	0.987847	-0.0749223	FAM9A	FALSE	NA	NA	NA	NA
8137006	0.0180674	590	0.987847	-0.0711356	RNU6ATAC40P	FALSE	chr7	144451680	+	NA
8112740	0.0181027	591	0.987847	0.0477937	ZBED3	FALSE	chr5	77087323	-	NA
8088996	0.0181127	592	0.987847	-0.153257	NA	FALSE	NA	NA	NA	NA
8068610	0.0182095	593	0.987847	-0.125849	NA	FALSE	NA	NA	NA	NA
7896557	0.0182404	594	0.987847	-0.153101	NA	FALSE	NA	NA	NA	NA
7965979	0.0182565	595	0.987847	-0.0628404	ALDH1L2	FALSE	chr12	105084577	-	NA
7894244	0.0182654	596	0.987847	-0.103932	NA	FALSE	NA	NA	NA	NA
8174283	0.0183178	597	0.987847	-0.0538381	H2BFWT	FALSE	NA	NA	NA	NA
7893268	0.0183244	598	0.987847	-0.0582724	NA	FALSE	NA	NA	NA	NA
8171921	0.0183419	599	0.987847	-0.0330641	DMD	FALSE	NA	NA	NA	NA
8021716	0.018352	600	0.987847	0.0568844	TIMM21	FALSE	chr18	74148510	+	NA
8026292	0.0183861	601	0.987847	0.0556116	EEF1DP1	FALSE	NA	NA	NA	NA
7979241	0.0184072	602	0.987847	0.0575761	BMP4	FALSE	chr14	53956811	-	NA
7999196	0.0184193	603	0.987847	0.0476606	ZNF500	FALSE	chr16	4767218	-	NA
7923698	0.0184439	604	0.987847	-0.113432	RNA5SP74	FALSE	chr1	204562521	-	NA
8083422	0.0184887	605	0.987847	-0.0807836	SUCNR1	FALSE	chr3	151873642	+	NA
8159959	0.0185014	606	0.987847	-0.11338	NA	FALSE	NA	NA	NA	NA
7894905	0.0185147	607	0.987847	-0.0819196	NA	FALSE	NA	NA	NA	NA
7923183	0.0185227	608	0.987847	0.0458858	ZNF281	FALSE	chr1	200410056; 200410009; 200409992	-	rs55838263
8088480	0.0185304	609	0.987847	0.0524226	ID2B	FALSE	NA	NA	NA	NA
8169541	0.0185857	610	0.987847	-0.0366223	DOCK11	FALSE	NA	NA	NA	NA
7946703	0.0185872	611	0.987847	-0.0394176	COPB1	FALSE	chr11	14457886; 14461222; 14499852; 14499895; 14461341; 14475875; 14499811; 14499862; 14500027; 14499666; 14499810; 14499846	-	NA
8132501	0.0185984	612	0.987847	-0.120773	RNU7-35P	FALSE	chr7	43194420	+	NA
8022994	0.0186003	613	0.987847	-0.0876163	RNU6-443P	FALSE	chr18	43832265	-	NA
8052667	0.0186407	614	0.987847	-0.0806835	NA	FALSE	NA	NA	NA	NA
7899187	0.0186628	615	0.987847	0.0623225	HMGN2	FALSE	chr1	26472518	+	NA
8071061	0.0187768	616	0.987847	0.143225	TPTEP1	FALSE	chr22	16612581	+	NA
8139706	0.0188295	617	0.987847	-0.0496885	SEC61G	TRUE	chr7	54759246	-	NA
7896388	0.0188373	618	0.987847	0.0811414	NA	FALSE	NA	NA	NA	NA
8092640	0.0188456	619	0.987847	-0.0706815	RFC4	FALSE	chr3	186806501	-	NA
7898026	0.0188831	620	0.987847	-0.0496667	PRAMEF16	FALSE	NA	NA	NA	NA
8180223	0.0189196	621	0.987847	-0.092144	NA	FALSE	NA	NA	NA	NA
7984330	0.0190099	622	0.987847	-0.0610368	ZWILCH	FALSE	chr15	66504958; 66504958; 66505082; 66505116; 66505294; 66505294; 66505299; 66505299; 66505299; 66505325; 66520507; 66523510; 66537168; 66540152	+	NA
8090503	0.019032	623	0.987847	-0.0804292	NA	FALSE	NA	NA	NA	NA
8109333	0.0190353	624	0.987847	0.0521941	GPX3	FALSE	chr5	151020562	+	NA
7980765	0.0191419	625	0.987847	0.0649306	GPR68	FALSE	chr14	91244508	-	NA
7954312	0.0191452	626	0.987847	-0.0560198	SLCO1C1	FALSE	chr12	20695461	+	NA
8141342	0.0192565	627	0.987847	-0.0540643	CYP3A7	FALSE	chr7	99735096	-	NA
8135361	0.0192666	628	0.987847	-0.124803	RNU6-392P	FALSE	chr7	106208166	+	NA
7901611	0.0192786	629	0.987847	-0.0540547	SSBP3-AS1	FALSE	chr1	54236439	+	NA
7973820	0.019289	630	0.987847	-0.128553	RNU6-541P	FALSE	chr14	31142938	+	NA
8030366	0.0193208	631	0.987847	-0.0988904	SNORD35A	FALSE	chr19	49491174	+	rs2303759; rs8107548
7899251	0.0193379	632	0.987847	0.0832777	RN7SL165P	FALSE	chr1	26814821	+	NA
7892623	0.0193854	633	0.987847	0.0647956	NA	FALSE	NA	NA	NA	NA
8043630	0.0195433	634	0.987847	0.0663099	ARID5A	FALSE	chr2	96537344	+	NA
7895540	0.0195452	635	0.987847	-0.124535	NA	FALSE	NA	NA	NA	NA
8109585	0.0195499	636	0.987847	0.0454849	LSM11	FALSE	chr5	157743694	+	NA
8033818	0.0195532	637	0.987847	0.0663044	OLFM2	FALSE	chr19	9936552	-	rs34536443; rs8112449
7955425	0.0196081	638	0.987847	0.0519413	ATF1	FALSE	chr12	50764291	+	NA
7895713	0.0196278	639	0.987847	0.269337	NA	FALSE	NA	NA	NA	NA
7958410	0.0196683	640	0.987847	0.0519151	FICD	FALSE	chr12	108515184	+	NA
7895222	0.019687	641	0.987847	-0.141428	NA	FALSE	NA	NA	NA	NA
7896217	0.0196943	642	0.987847	-0.0868579	NA	FALSE	NA	NA	NA	NA
8121112	0.0197008	643	0.987847	-0.0868536	RN7SL11P	FALSE	chr6	89478140	+	NA
7893902	0.0197493	644	0.987847	0.214034	NA	FALSE	NA	NA	NA	NA
8169015	0.0197536	645	0.987847	-0.0493195	TCEAL7	FALSE	NA	NA	NA	NA
8032491	0.0197672	646	0.987847	0.0406266	LMNB2	FALSE	chr19	2456996	-	NA
8041031	0.0198238	647	0.987847	-0.0388403	BRE	FALSE	chr2	27890762; 27890786; 27889940; 27890783; 27894619; 27894544; 27890728; 27890749; 27890791; 27890792; 27890792	+	NA
7953321	0.0198321	648	0.987847	0.0804511	LTBR	FALSE	chr12	6375428	+	rs12296430; rs1800693
8072272	0.0198437	649	0.987847	-0.0531756	NA	FALSE	NA	NA	NA	NA
7966688	0.0198759	650	0.987847	-0.102618	NA	FALSE	NA	NA	NA	NA
8096091	0.0198891	651	0.987847	0.0610525	THAP9	FALSE	chr4	82900751	+	NA
7984624	0.0198895	652	0.987847	-0.0537925	NA	FALSE	NA	NA	NA	NA
8099826	0.0198921	653	0.987847	-0.0810268	TLR10	FALSE	chr4	38782990	-	NA
7944718	0.0199082	654	0.987847	-0.0810167	RNU4ATAC10P	FALSE	chr11	122449209	+	NA
8092187	0.0199891	655	0.987847	-0.0691209	SPATA16	FALSE	chr3	173141268	-	NA
8151659	0.0200004	656	0.987847	-0.0580404	CNGB3	FALSE	chr8	86743675	-	NA
8120360	0.020013	657	0.987847	-0.0605517	RNU6-626P	FALSE	chr6	56945729	+	NA
8002344	0.0200327	658	0.987847	0.044953	EXOSC6	FALSE	chr16	70251930	-	NA
7895553	0.0200557	659	0.987847	-0.127805	NA	FALSE	NA	NA	NA	NA
8176397	0.0200882	660	0.987847	0.0560482	TGIF2LX	FALSE	NA	NA	NA	NA
8180285	0.0201013	661	0.987847	0.0452773	NA	FALSE	NA	NA	NA	NA
8010770	0.0201233	662	0.987847	0.0567406	SLC16A3	FALSE	chr17	82228405	+	NA
8081356	0.020133	663	0.987847	-0.0547677	NA	FALSE	NA	NA	NA	NA
8085676	0.0201507	664	0.987847	-0.0574219	DAZL	FALSE	chr3	16604790	-	NA
8130565	0.020185	665	0.987847	-0.0699362	RNU4ATAC18P	FALSE	chr6	159720540	-	NA
7893854	0.020222	666	0.987847	0.203566	NA	FALSE	NA	NA	NA	NA
7969815	0.0202323	667	0.987847	0.0865741	CLYBL	FALSE	chr13	99606695	+	rs4772201
8084630	0.0202513	668	0.987847	0.0751538	LOC344887	FALSE	NA	NA	NA	NA
7961279	0.0202798	669	0.987847	-0.111825	TAS2R14	FALSE	chr12	10939263	-	NA
8147194	0.0203383	670	0.987847	-0.0762786	CNBD1	FALSE	chr8	86866444	+	NA
8112220	0.0203535	671	0.987847	-0.091121	PDE4D	FALSE	chr5	59276119	-	NA
8068974	0.0203759	672	0.987847	-0.0222899	TRAPPC10	FALSE	chr21	44012318	+	NA
7990830	0.0203887	673	0.987847	0.0490684	MESDC2	FALSE	chr15	80989878	-	NA
7895832	0.0203989	674	0.987847	-0.057861	NA	FALSE	NA	NA	NA	NA
8117614	0.0204138	675	0.987847	-0.0807024	HIST1H2BO	FALSE	chr6	27893462	+	NA
7968746	0.0204249	676	0.987847	0.0607829	WBP4	FALSE	chr13	41061273	+	NA
8059672	0.0204446	677	0.987847	-0.0475157	BANF1P3	FALSE	NA	NA	NA	NA
7957271	0.0204878	678	0.987847	-0.0535423	NA	FALSE	NA	NA	NA	NA
8148941	0.0205129	679	0.987847	0.046828	ZNF7	FALSE	chr8	144827558	+	NA
7903049	0.0205654	680	0.987847	0.0749595	CCDC18	FALSE	chr1	93180362	+	rs11810217
7995308	0.0206688	681	0.987847	-0.0489685	RNA5-8SP2	FALSE	chr16	34162958	+	NA
8129377	0.0206713	682	0.987847	0.0612782	RNU6-200P	FALSE	chr6	126590393	-	NA
8070315	0.0206759	683	0.987847	-0.0571897	LINC00114	FALSE	chr21	38742053; 38742517; 38747460	-	NA
7894301	0.0208257	684	0.987847	0.0861514	NA	FALSE	NA	NA	NA	NA
8131427	0.020852	685	0.987847	-0.0367993	C7orf26	FALSE	chr7	6590016	+	NA
7948312	0.0209362	686	0.987847	-0.0891237	OR1S2	FALSE	chr11	58204181	-	NA
8111251	0.0209762	687	0.987847	-0.0976513	NA	FALSE	chr5	23972294	-	NA
8070213	0.0209829	688	0.987847	-0.0792246	NA	FALSE	NA	NA	NA	NA
7980454	0.0210299	689	0.987847	0.0639214	ALKBH1	FALSE	chr14	77708020	-	NA
7895894	0.0210373	690	0.987847	-0.0906547	NA	FALSE	NA	NA	NA	NA
8068363	0.0211283	691	0.987847	-0.0724221	LINC00310	FALSE	chr21	34180676	+	NA
8114843	0.0211405	692	0.987847	0.13438	RN7SKP246	FALSE	chr5	144535670	-	NA
7918149	0.0211793	693	0.987847	-0.0723945	NA	FALSE	NA	NA	NA	NA
7893251	0.0212151	694	0.987847	0.176086	NA	FALSE	NA	NA	NA	NA
7965589	0.0212371	695	0.987847	-0.0526079	CCDC38	FALSE	chr12	95942974	-	NA
7999476	0.0212672	696	0.987847	-0.0974421	NA	FALSE	NA	NA	NA	NA
7949765	0.0212706	697	0.987847	-0.030015	PPP1CA	FALSE	chr11	67401793	-	NA
8125500	0.0212886	698	0.987847	-0.0532171	PSMB8	FALSE	chr6	32844703	-	NA
8178855	0.0212886	699	0.987847	-0.0532171	PSMB8	FALSE	chr6	32844703	-	NA
8180049	0.0212886	700	0.987847	-0.0532171	PSMB8	FALSE	chr6	32844703	-	NA
8016870	0.0213085	701	0.987847	0.0603517	MRPS23	FALSE	chr17	57850056	-	NA
7947553	0.0213519	702	0.987847	-0.0723017	LRRC4C	FALSE	chr11	40294114; 40319730; 40293130; 41459585; 41459773; 40241883; 41459636	-	NA
7995324	0.0214148	703	0.987847	0.0653014	NA	FALSE	NA	NA	NA	NA
8050213	0.0214175	704	0.987847	-0.090401	NA	FALSE	NA	NA	NA	NA
8123889	0.0214356	705	0.987847	-0.0903891	NA	FALSE	NA	NA	NA	NA
7894593	0.0214508	706	0.987847	-0.139613	NA	FALSE	NA	NA	NA	NA
8037621	0.021475	707	0.987847	0.0511601	EML2	FALSE	chr19	45645629	-	NA
7892928	0.0215497	708	0.987847	-0.0428377	NA	FALSE	NA	NA	NA	NA
7976080	0.0215546	709	0.987847	0.0577665	GPR65	FALSE	chr14	88005123	+	rs2119704; rs74796499
8040111	0.0215581	710	0.987847	-0.0692153	NA	FALSE	NA	NA	NA	NA
8130422	0.021607	711	0.987847	-0.0598224	CNKSR3	FALSE	chr6	154510659	-	NA
8159692	0.0216285	712	0.987847	0.0400239	ARRDC1	FALSE	chr9	137605702	+	NA
7939118	0.0216656	713	0.987847	-0.0691605	NA	FALSE	NA	NA	NA	NA
8079931	0.0216839	714	0.987847	-0.0524328	SLC38A3	FALSE	chr3	50205245	+	NA
8006608	0.0216935	715	0.987847	0.139698	CCL4L2	FALSE	chr17	36211062	+	NA
8052669	0.0217364	716	0.987847	0.0601485	SERTAD2	FALSE	chr2	64653913	-	NA
8072486	0.021798	717	0.987847	0.0651046	LOC54944	FALSE	NA	NA	NA	NA
8014925	0.0218602	718	0.987847	-0.0321559	MED24	FALSE	chr17	40054405	-	rs12946510
7893098	0.0219093	719	0.987847	-0.0854271	NA	FALSE	NA	NA	NA	NA
8154414	0.0219132	720	0.987847	-0.110496	RNU6-246P	FALSE	chr9	15544187	+	NA
7972239	0.0219774	721	0.987847	-0.0610448	SLITRK6	FALSE	chr13	85799488	-	NA
8133089	0.0220289	722	0.987847	0.0740875	ZNF92	FALSE	chr7	65373798	+	NA
8062433	0.0220336	723	0.987847	0.0397046	RPRD1B	FALSE	chr20	38033545	+	NA
8122858	0.0220382	724	0.987847	-0.0753197	RNA5SP223	FALSE	chr6	152410274	+	NA
8146423	0.0220635	725	0.987847	-0.0726249	NA	FALSE	NA	NA	NA	NA
8076836	0.022131	726	0.987847	0.0492254	BRD1	FALSE	chr22	49823213; 49824804; 49825900; 49827512; 49824804; 49776115; 49823301; 49823205	-	NA
7892656	0.0221328	727	0.987847	0.200294	NA	FALSE	NA	NA	NA	NA
7952406	0.0221363	728	0.987847	-0.0565697	OR8B12	FALSE	chr11	124543679	-	NA
7972745	0.0221476	729	0.987847	0.063361	IRS2	FALSE	chr13	109786568	-	NA
8177426	0.0221641	730	0.987847	-0.051154	DAZ4	FALSE	NA	NA	NA	NA
7921358	0.0221692	731	0.987847	-0.0883251	OR10T1P	FALSE	NA	NA	NA	NA
7950471	0.0221833	732	0.987847	0.05512	OR2AT4	FALSE	chr11	75089754	-	NA
7896523	0.0221941	733	0.987847	0.0987739	NA	FALSE	NA	NA	NA	NA
8034055	0.0222174	734	0.987847	0.0538897	KRI1	FALSE	chr19	10566037	-	rs2288904; rs34536443; rs8112449
8088192	0.0222834	735	0.987847	-0.0468637	ERC2	FALSE	chr3	56468363	-	NA
7968085	0.0223211	736	0.987847	-0.173126	RNF17	FALSE	chr13	24764151; 24764200; 24764200; 24803733; 24843878	+	NA
7988400	0.0223631	737	0.987847	0.0461523	SHF	FALSE	chr15	45201175	-	NA
8035646	0.0223796	738	0.987847	0.0538228	HAPLN4	FALSE	chr19	19262796	-	NA
7973850	0.0223948	739	0.987847	-0.0564637	AKAP6	FALSE	chr14	32329272	+	NA
8139125	0.0224357	740	0.987847	-0.166527	TRGV4	FALSE	chr7	38354517	-	NA
8069872	0.0224544	741	0.987847	-0.0594534	KRTAP11-1	FALSE	chr21	30881555	-	NA
8151219	0.0224993	742	0.987847	-0.0794732	NA	FALSE	NA	NA	NA	NA
8059341	0.0225264	743	0.987847	-0.0867128	RN7SL807P	FALSE	chr2	223248794	-	NA
8152845	0.0225574	744	0.987847	-0.0309246	FAM49B	FALSE	chr8	129939872	-	NA
8119974	0.0225814	745	0.987847	-0.05209	SLC29A1	FALSE	chr6	44223564	+	NA
8001924	0.0225956	746	0.987847	-0.0380315	FAM96B	FALSE	chr16	66934400	-	NA
8099631	0.0225978	747	0.987847	0.0507187	CDC42P6	FALSE	NA	NA	NA	NA
7947421	0.0227042	748	0.987847	-0.138398	NA	FALSE	NA	NA	NA	NA
8163784	0.022713	749	0.987847	-0.0308897	FBXW2	FALSE	chr9	120793412	-	NA
8045368	0.0227715	750	0.987847	-0.0677068	ACMSD	FALSE	chr2	134838546	+	NA
8167601	0.0228039	751	0.987847	0.0602632	USP27X	FALSE	NA	NA	NA	NA
8065517	0.0229134	752	0.987847	0.050598	ZNF337	FALSE	chr20	25686957	-	NA
8006621	0.0229322	753	0.987847	0.138327	CCL4L2	FALSE	chr17	36211062	+	NA
8019651	0.0229322	754	0.987847	0.138327	CCL4L2	FALSE	chr17	36211062	+	NA
7965873	0.0230454	755	0.987847	-0.0605779	IGF1	FALSE	chr12	102480645	-	NA
8033746	0.0230695	756	0.987847	0.0595372	ZNF699	FALSE	chr19	9305119	-	NA
8170135	0.0231408	757	0.987847	-0.0567021	GPR112	FALSE	NA	NA	NA	NA
8043034	0.0231945	758	0.987847	-0.0697884	NA	FALSE	NA	NA	NA	NA
8067946	0.023215	759	0.987847	-0.0683961	MIR125B2	FALSE	chr21	16590236	+	NA
8034694	0.0232484	760	0.987847	0.189388	MIR24-2	FALSE	chr19	13836359	-	NA
7929986	0.0232641	761	0.987847	-0.121243	RNU6-1165P	FALSE	chr10	101622858	+	NA
7892883	0.0232788	762	0.987847	0.173167	NA	FALSE	NA	NA	NA	NA
8162938	0.0232879	763	0.987847	-0.0683612	OR13C9	FALSE	chr9	104618204	-	NA
8058905	0.0232888	764	0.987847	0.0924156	CXCR1	FALSE	chr2	218166995	-	NA
8107594	0.0233129	765	0.987847	-0.0480247	SNCAIP	FALSE	chr5	122312124	+	NA
7953341	0.0233752	766	0.987847	0.0733293	TAPBPL	FALSE	chr12	6452083	+	rs12296430; rs1800693
8115838	0.0233824	767	0.987847	-0.0683161	NA	FALSE	NA	NA	NA	NA
8089677	0.0233925	768	0.987847	0.0923432	NA	FALSE	NA	NA	NA	NA
7985488	0.0234035	769	0.987847	0.0441296	FAM103A1	FALSE	chr15	82986206	+	NA
8033813	0.0234393	770	0.987847	0.0504002	FBXL12	FALSE	chr19	9819055	-	NA
8080082	0.0234427	771	0.987847	-0.0789489	NA	FALSE	NA	NA	NA	NA
8111993	0.0234447	772	0.987847	-0.0560435	FGF10	FALSE	chr5	44388797	-	NA
8103452	0.0234677	773	0.987847	-0.0682756	C4orf45	FALSE	chr4	159035181	-	NA
8054439	0.0234685	774	0.987847	0.0552781	ST6GAL2	FALSE	chr2	106886646	-	NA
7896109	0.0234954	775	0.987847	0.209194	NA	FALSE	NA	NA	NA	NA
8109610	0.0235155	776	0.987847	-0.0890668	RNU4ATAC2P	FALSE	chr5	159318041	+	rs11743296; rs2546890
8154307	0.0235352	777	0.987847	-0.056008	TPD52L3	FALSE	chr9	6328374	+	NA
7966684	0.0235865	778	0.987847	-0.0603485	RN7SKP216	FALSE	chr12	114505187	-	NA
7902874	0.0236311	779	0.987847	0.0721561	LRRC8C	FALSE	chr1	89633071	+	NA
8095744	0.0236317	780	0.987847	0.296901	AREG	FALSE	chr4	74445133	+	NA
7974341	0.0236426	781	0.987847	-0.0421934	GNG2	FALSE	chr14	51860640; 51847171; 51877633; 51913111; 51826199; 51826199; 51826194; 51861323; 51847233; 51847233; 51860641; 51860733; 51860645; 51860413; 51877591; 51847125	+	NA
7965867	0.0236881	782	0.987847	-0.058937	PMCH	FALSE	chr12	102197845	-	NA
7933501	0.0237198	783	0.987847	-0.0505896	DRGX	FALSE	chr10	49396016	-	NA
7982514	0.023779	784	0.987847	-0.0843127	NA	FALSE	NA	NA	NA	NA
8164918	0.0237794	785	0.987847	-0.0516503	SLC2A6	FALSE	chr9	133479096	-	NA
7895152	0.0237819	786	0.987847	-0.165044	NA	FALSE	NA	NA	NA	NA
8040576	0.0237836	787	0.987847	-0.0889037	RNU6-936P	FALSE	chr2	24676308	+	rs4665719
8172787	0.0237971	788	0.987847	-0.0421478	SSX2B	FALSE	NA	NA	NA	NA
8048141	0.0238249	789	0.987847	0.062565	TMEM169	FALSE	chr2	216081865	+	NA
8147650	0.0238447	790	0.987847	-0.10903	NA	FALSE	NA	NA	NA	NA
7894734	0.0238449	791	0.987847	-0.0564236	NA	FALSE	NA	NA	NA	NA
8017885	0.0238843	792	0.987847	-0.0558723	ABCA8	FALSE	chr17	68955241	-	NA
8139365	0.0238903	793	0.987847	-0.0602216	RNU6-1097P	FALSE	chr7	44503879	-	NA
8000329	0.0238914	794	0.987847	0.0502333	PALB2	FALSE	chr16	23641310	-	NA
7946332	0.0239091	795	0.987847	-0.0680677	OR10A3	FALSE	chr11	7939594	-	NA
8087778	0.0239548	796	0.987847	-0.0810342	RNU6ATAC29P	FALSE	chr3	51611562	-	NA
7979367	0.0239651	797	0.987847	-0.0463068	EXOC5	FALSE	chr14	57269008	-	NA
8109141	0.0239721	798	0.987847	0.0543867	GRPEL2	FALSE	chr5	149345429	+	NA
8045637	0.0239825	799	0.987847	-0.116141	KIF5C	FALSE	chr2	148875249	+	NA
8076584	0.0239895	800	0.987847	-0.0477981	SCUBE1	FALSE	chr22	43343388	-	NA
8139128	0.0239988	801	0.987847	-0.206024	TRGV1	FALSE	chr7	38368169	-	NA
7985587	0.0240448	802	0.987847	0.0455794	SCAND2P	FALSE	NA	NA	NA	NA
7928819	0.0240591	803	0.987847	-0.0775073	RNA5SP322	FALSE	chr10	86052447	+	NA
8118147	0.0241208	804	0.987847	-0.0477547	LTB	FALSE	chr6	31582522; 31582425; 31582427; 31582406	-	NA
8022644	0.0241273	805	0.987847	-0.107693	RNU6-1289P	FALSE	chr18	26366406	-	NA
8133221	0.0241322	806	0.987847	-0.0587567	RNU6-832P	FALSE	chr7	69125269	+	NA
8036341	0.0241763	807	0.987847	0.0590529	ZNF461	FALSE	chr19	36666837	-	NA
8023377	0.0241879	808	0.987847	0.0438779	MEX3C	FALSE	chr18	51197320	-	NA
7894813	0.024228	809	0.987847	-0.0477195	NA	FALSE	NA	NA	NA	NA
8113759	0.0242468	810	0.987847	-0.0679108	NA	FALSE	NA	NA	NA	NA
7947396	0.024269	811	0.987847	0.0530727	CSTF3	FALSE	chr11	33161531	-	NA
8159541	0.0242903	812	0.987847	0.0438456	C9orf142	FALSE	chr9	136992417	+	NA
7944763	0.0242922	813	0.987847	-0.0715004	RNU4-23P	FALSE	chr11	122927033	+	NA
7929574	0.0242968	814	0.987847	-0.0520827	DNTT	FALSE	chr10	96304408	+	NA
7949851	0.0243107	815	0.987847	-0.0514614	C11orf72	FALSE	chr11	67606706	-	NA
8150818	0.0243116	816	0.987847	0.031504	TCEA1	FALSE	chr8	54022529	-	NA
7927058	0.0243758	817	0.987847	-0.058659	RN7SL314P	FALSE	chr10	37297397	+	NA
8157939	0.0244308	818	0.987847	0.0483922	ZBTB34	FALSE	chr9	126879347	+	NA
7934228	0.0245216	819	0.987847	0.0541711	ASCC1	FALSE	chr10	72216109	-	NA
8028213	0.0245378	820	0.987847	0.0588989	ZNF568	FALSE	chr19	36916328; 36916340; 36916340; 36916342; 36916363; 36916448; 36916454; 36922561; 36922570; 36936654; 36973212; 36973214; 36973217; 36973537; 36973560; 36991052	+	NA
8142036	0.0245677	821	0.987847	-0.0419241	SRPK2	FALSE	chr7	105298779	-	NA
8046560	0.0246099	822	0.987847	-0.041912	HOXD3	FALSE	chr2	176164076	+	NA
7894689	0.0246328	823	0.987847	-0.0772081	NA	FALSE	NA	NA	NA	NA
7894219	0.0246336	824	0.987847	-0.108459	NA	FALSE	NA	NA	NA	NA
7969977	0.0246438	825	0.987847	0.0877355	ATP5G1P5	FALSE	NA	NA	NA	NA
7980889	0.0246658	826	0.987847	-0.0585439	NA	FALSE	NA	NA	NA	NA
8054930	0.0246768	827	0.987847	0.0437247	NIFK	FALSE	chr2	121736923	-	NA
8135902	0.0247317	828	0.987847	-0.0883392	SND1-IT1	FALSE	chr7	127997596	+	NA
8176663	0.0248668	829	0.987847	-0.100001	RNU6-109P	FALSE	NA	NA	NA	NA
8177176	0.0248668	830	0.987847	-0.100001	RNU6-109P	FALSE	NA	NA	NA	NA
7961281	0.0248799	831	0.987847	-0.123587	TAS2R50	FALSE	chr12	10986912	-	NA
8043441	0.0249136	832	0.987847	0.209393	IGKV1D-27	FALSE	NA	NA	NA	NA
7989785	0.024915	833	0.987847	0.0540193	IGDCC4	FALSE	chr15	65423072	-	NA
7921119	0.0249564	834	0.987847	0.104951	NA	FALSE	NA	NA	NA	NA
8127999	0.0250267	835	0.987847	-0.077006	NDUFA5P9	FALSE	NA	NA	NA	NA
8038192	0.025178	836	0.987847	0.0435703	FUT1	FALSE	chr19	48755390	-	NA
8045602	0.0252231	837	0.987847	-0.083502	RNU6-1275P	FALSE	chr2	147877421	+	NA
8058695	0.0252589	838	0.987847	0.0764724	BARD1	FALSE	chr2	214809704	-	NA
7893866	0.0253043	839	0.987847	0.0435318	NA	FALSE	NA	NA	NA	NA
8132617	0.0253092	840	0.987847	0.0435304	ZMIZ2	FALSE	chr7	44748930	+	NA
8036865	0.0253108	841	0.987847	-0.107982	RNU6-945P	FALSE	chr19	40299584	-	NA
8144378	0.0253252	842	0.987847	0.0538632	AGPAT5	FALSE	chr8	6708356	+	NA
7962358	0.0253293	843	0.987847	-0.0458792	YAF2	FALSE	chr12	42238236	-	NA
7976578	0.0253576	844	0.987847	-0.0510992	AK7	FALSE	chr14	96392110	+	NA
7913300	0.0253691	845	0.987847	-0.0267491	HP1BP3	FALSE	chr1	20786688	-	NA
7942400	0.0254323	846	0.987847	0.0545028	P2RY2	FALSE	chr11	73218297	+	NA
7938010	0.0254337	847	0.987847	-0.0673741	OR52B6	FALSE	chr11	5580876	+	NA
8098848	0.0254986	848	0.987847	0.0426578	SLC26A1	FALSE	chr4	993440	-	NA
8172905	0.0255697	849	0.987847	-0.0431441	HSD17B10	FALSE	NA	NA	NA	NA
7956759	0.0256164	850	0.987847	-0.0552231	SRGAP1	FALSE	chr12	63844292	+	NA
8065905	0.0256538	851	0.987847	0.0617513	GDF5	FALSE	chr20	35438243	-	NA
8067662	0.0256976	852	0.987847	0.0386613	PTK6	FALSE	chr20	63537370	-	rs2256814; rs6062314
8167742	0.0257119	853	0.987847	-0.106585	XAGE5	FALSE	NA	NA	NA	NA
8105321	0.0257142	854	0.987847	-0.0832353	NA	FALSE	NA	NA	NA	NA
8134680	0.0257412	855	0.987847	0.0434	ZKSCAN1	FALSE	chr7	100015598	+	NA
7908931	0.0257963	856	0.987847	-0.0551579	OPTC	FALSE	chr1	203494142	+	NA
7896690	0.0257978	857	0.987847	-0.0672137	NA	FALSE	NA	NA	NA	NA
7953198	0.0258495	858	0.987847	0.0616673	NA	FALSE	NA	NA	NA	NA
7894139	0.0258624	859	0.987847	0.155619	NA	FALSE	NA	NA	NA	NA
7962904	0.0258686	860	0.987847	0.0368167	ARF3	TRUE	chr12	48957551	-	NA
8035813	0.0258769	861	0.987847	0.0616556	ZNF43	FALSE	chr19	21852028	-	NA
8107232	0.0259331	862	0.987847	-0.0876497	NA	FALSE	NA	NA	NA	NA
7892686	0.0259585	863	0.987847	0.0719763	NA	FALSE	NA	NA	NA	NA
7985493	0.0259695	864	0.987847	-0.0765332	TM6SF1	FALSE	chr15	83107680	+	NA
8062569	0.0259858	865	0.987847	-0.0733162	RN7SL116P	FALSE	chr20	38872769	+	NA
8122426	0.026069	866	0.987847	-0.094302	PHACTR2	FALSE	chr6	143677964	+	NA
7977216	0.0261255	867	0.987847	0.0387366	KIF26A	FALSE	chr14	104138722	+	NA
7958207	0.0261665	868	0.987847	-0.118971	NA	FALSE	NA	NA	NA	NA
8107518	0.0261971	869	0.987847	-0.0875018	RNU6-701P	FALSE	chr5	119138858	+	NA
8146353	0.0262092	870	0.987847	-0.094218	RNU6-665P	FALSE	chr8	47667770	+	NA
7944335	0.0262257	871	0.987847	-0.070594	CXCR5	FALSE	chr11	118883765	+	rs523604; rs533646
7893666	0.026228	872	0.987847	0.203148	NA	FALSE	NA	NA	NA	NA
7893009	0.0262507	873	0.987847	0.169346	NA	FALSE	NA	NA	NA	NA
7988342	0.0262968	874	0.987847	-0.162453	NA	FALSE	NA	NA	NA	NA
8144569	0.0263168	875	0.987847	-0.162433	RNU6-729P	FALSE	chr8	10476222	+	NA
8137474	0.0263173	876	0.987847	0.0614687	ACTR3B	FALSE	chr7	152759748	+	NA
7958273	0.0264072	877	0.987847	-0.106117	NA	FALSE	NA	NA	NA	NA
8167218	0.0264286	878	0.987847	-0.106102	NA	FALSE	NA	NA	NA	NA
8160276	0.026443	879	0.987847	-0.0698162	NA	FALSE	NA	NA	NA	NA
7974914	0.0264699	880	0.987847	-0.0566117	NA	FALSE	NA	NA	NA	NA
8091731	0.0264849	881	0.987847	-0.0628604	GPR79	FALSE	NA	NA	NA	NA
7958761	0.0264963	882	0.987847	0.0477005	ACAD10	FALSE	chr12	111686075	+	NA
8063024	0.0265881	883	0.987847	-0.0548752	SPINT5P	FALSE	NA	NA	NA	NA
8114812	0.026598	884	0.987847	-0.0773171	NA	FALSE	NA	NA	NA	NA
8078300	0.026692	885	0.987847	0.0492566	OXSM	FALSE	chr3	25790079	+	NA
8047097	0.0267021	886	0.987847	-0.0454683	GLS	FALSE	chr2	190880833	+	rs9967792
7892832	0.026792	887	0.987847	0.071565	NA	FALSE	NA	NA	NA	NA
8098500	0.0268079	888	0.987847	0.053317	CDKN2AIP	FALSE	chr4	183444590	+	NA
7999404	0.0268114	889	0.987847	-0.0987653	NA	FALSE	NA	NA	NA	NA
8171535	0.0268292	890	0.987847	-0.0577193	NA	FALSE	NA	NA	NA	NA
7979804	0.0268674	891	0.987847	-0.0795053	RN7SL706P	FALSE	chr14	68149908	-	NA
7938261	0.0268909	892	0.987847	0.0627417	OR5E1P	FALSE	NA	NA	NA	NA
8036004	0.0269014	893	0.987847	0.0532834	CEBPA	FALSE	chr19	33302564	-	NA
8013588	0.0269036	894	0.987847	-0.0352704	POLDIP2	FALSE	chr17	28357463	-	NA
8126566	0.026906	895	0.987847	0.0612231	LRRC73	FALSE	chr6	43510686	-	NA
7927643	0.026923	896	0.987847	0.0715013	NA	FALSE	NA	NA	NA	NA
8114193	0.026964	897	0.987847	0.0430412	SAR1B	FALSE	chr5	134632774	-	NA
7964976	0.0269722	898	0.987847	0.0446609	TRHDE-AS1	FALSE	chr12	72258240; 72272526; 72271991; 72274907	-	NA
7896370	0.0269803	899	0.987847	0.128584	NA	FALSE	NA	NA	NA	NA
7941164	0.0269961	900	0.987847	0.0475402	MRPL49	FALSE	chr11	65122327	+	NA
8115166	0.0270046	901	0.987847	0.0822869	NA	FALSE	NA	NA	NA	NA
7895077	0.0271074	902	0.987847	-0.0412273	NA	FALSE	NA	NA	NA	NA
8095736	0.0271404	903	0.987847	0.253364	AREG	FALSE	chr4	74445133	+	NA
7989073	0.0272204	904	0.987847	-0.0824436	PRTG	FALSE	chr15	55742979	-	NA
7893185	0.0272278	905	0.987847	-0.125046	NA	FALSE	NA	NA	NA	NA
8012006	0.0272505	906	0.987847	0.0490726	SLC16A11	FALSE	chr17	7043923	-	NA
8022653	0.0272671	907	0.987847	-0.0467722	PCAT18	FALSE	chr18	26703638	-	NA
8175297	0.0272807	908	0.987847	-0.106653	RNU6-616P	FALSE	NA	NA	NA	NA
8084012	0.0272836	909	0.987847	-0.0707002	NA	FALSE	NA	NA	NA	NA
7896259	0.0272879	910	0.987847	-0.105538	NA	FALSE	NA	NA	NA	NA
7892769	0.027322	911	0.987847	0.201554	NA	FALSE	NA	NA	NA	NA
7954240	0.0273619	912	0.987847	-0.066546	CAPZA3	FALSE	chr12	18738100	+	NA
7895797	0.0273792	913	0.987847	-0.124931	NA	FALSE	NA	NA	NA	NA
8068083	0.0274099	914	0.987847	-0.0935134	MAP3K7CL	FALSE	chr21	29130484	+	NA
8112767	0.0274517	915	0.987847	0.0519177	TBCA	FALSE	chr5	77776361	-	NA
8160452	0.0275485	916	0.987847	0.0609603	CDKN2B	FALSE	chr9	22009363	-	NA
7969286	0.0275606	917	0.987847	-0.0664635	LOC101060458	FALSE	NA	NA	NA	NA
8139121	0.0275896	918	0.987847	-0.16381	TRGV3	FALSE	chr7	38359162	-	NA
8059475	0.0276341	919	0.987847	-0.0587619	COL4A4	FALSE	chr2	227164113	-	NA
8167560	0.0276436	920	0.987847	-0.117895	GAGE12F	FALSE	NA	NA	NA	NA
7893930	0.0276892	921	0.987847	0.119053	NA	FALSE	NA	NA	NA	NA
8174670	0.0276922	922	0.987847	-0.0705206	KIAA1210	FALSE	NA	NA	NA	NA
7916910	0.0277566	923	0.987847	-0.0410581	LRRC40	FALSE	chr1	70205620	-	NA
8073705	0.0277805	924	0.987847	0.058185	PRR5	FALSE	chr22	44668546	+	NA
8088866	0.0277859	925	0.987847	-0.0623467	CNTN3	FALSE	chr3	74521140	-	NA
8042942	0.0278219	926	0.987847	0.0948329	HK2	FALSE	chr2	74833980	+	NA
7893784	0.0278625	927	0.987847	-0.0932546	NA	FALSE	NA	NA	NA	NA
7968915	0.0278755	928	0.987847	-0.0465935	GTF2F2	FALSE	chr13	45120514	+	NA
7897561	0.0279223	929	0.987847	-0.0549372	KIF1B	FALSE	chr1	10210804	+	rs10492972
8106528	0.0279383	930	0.987847	-0.121259	NA	FALSE	NA	NA	NA	NA
8019532	0.0280033	931	0.987847	0.0517295	RAB40B	FALSE	chr17	82698728	-	NA
8101226	0.0280088	932	0.987847	-0.0543856	RNU6-1187P	FALSE	chr4	77150437	-	NA
7895945	0.0280541	933	0.987847	0.0817096	NA	FALSE	NA	NA	NA	NA
8180374	0.0280766	934	0.987847	-0.040976	NA	FALSE	NA	NA	NA	NA
7898048	0.0281338	935	0.987847	-0.0450587	PRAMEF16	FALSE	NA	NA	NA	NA
7943984	0.0281653	936	0.987847	0.060713	ZBTB16	FALSE	chr11	114060506	+	NA
8175583	0.0282031	937	0.987847	-0.104954	RNA5SP517	FALSE	NA	NA	NA	NA
8086538	0.0282889	938	0.987847	0.191246	LIMD1-AS1	FALSE	chr3	45689134	-	NA
7978586	0.0283469	939	0.987847	0.0621386	CFL2	FALSE	chr14	34714555	-	NA
7893416	0.0283622	940	0.987847	0.117136	NA	FALSE	NA	NA	NA	NA
8128843	0.0283804	941	0.987847	-0.0661285	DDO	FALSE	chr6	110415562	-	NA
8052416	0.0284559	942	0.987847	0.0748259	RN7SL632P	FALSE	chr2	60831929	-	rs842639
8157947	0.0284759	943	0.987847	0.0486802	ZBTB34	FALSE	chr9	126879347	+	NA
8138956	0.0284911	944	0.987847	-0.0620768	RNU6-438P	FALSE	chr7	34297598	-	NA
8061847	0.0285116	945	0.987847	-0.0643712	BPIFA2	FALSE	chr20	33168153	+	NA
8027049	0.0285183	946	0.987847	0.042605	KLHL26	FALSE	chr19	18636964	+	rs11554159; rs874628
8180395	0.0285254	947	0.987847	0.046274	NA	FALSE	NA	NA	NA	NA
7930612	0.028554	948	0.987847	-0.0701491	NA	FALSE	NA	NA	NA	NA
7977478	0.0286567	949	0.987847	-0.0701055	OR4K13	FALSE	chr14	20034760	-	NA
7896056	0.0286609	950	0.987847	-0.105769	NA	FALSE	NA	NA	NA	NA
7950409	0.028725	951	0.987847	0.0486022	KCNE3	FALSE	chr11	74467628	-	NA
8055445	0.0287468	952	0.987847	0.0485954	DARS	FALSE	chr2	135911617; 135912559; 135914866; 135920553; 135980551; 135983447; 135985563; 135985684; 135985884; 135985897; 135986100	-	NA
8017139	0.02876	953	0.987847	0.0604791	MIR301A	FALSE	chr17	59151221	-	NA
8065580	0.0287876	954	0.987847	0.0417343	DUSP15	FALSE	chr20	31869998	-	NA
7928489	0.028801	955	0.987847	-0.112693	NA	FALSE	NA	NA	NA	NA
8166140	0.0289263	956	0.987847	0.152339	MOSPD2	FALSE	NA	NA	NA	NA
8136587	0.0289268	957	0.987847	-0.0659097	NA	FALSE	NA	NA	NA	NA
7974479	0.0289686	958	0.987847	-0.0658931	NA	FALSE	NA	NA	NA	NA
8110861	0.029047	959	0.987847	0.0513821	MRPL36	FALSE	chr5	1799839	-	NA
7895134	0.0290476	960	0.987847	-0.142431	NA	FALSE	NA	NA	NA	NA
8162584	0.0290786	961	0.987847	-0.0658495	RNU6-1160P	FALSE	chr9	96256319	-	NA
8075633	0.0291052	962	0.987847	-0.0815034	RNA5SP497	FALSE	chr22	32635198	-	NA
8129677	0.0291355	963	0.987847	0.0922005	SGK1	FALSE	chr6	134177905	-	NA
8094516	0.0291724	964	0.987847	-0.0859172	RN7SL101P	FALSE	chr4	28711197	+	NA
8110708	0.0291921	965	0.987847	-0.0406959	TPPP	FALSE	chr5	693395	-	NA
8098782	0.0292549	966	0.987847	0.0484383	CPLX1	FALSE	chr4	826198	-	NA
8003066	0.0292649	967	0.987847	0.101898	NA	FALSE	NA	NA	NA	NA
8123780	0.029282	968	0.987847	-0.0514585	CAGE1	FALSE	chr6	7389743	-	NA
7901376	0.0292902	969	0.987847	-0.0406717	RNF11	FALSE	chr1	51236270	+	NA
8174373	0.0292963	970	0.987847	-0.0698367	NA	FALSE	NA	NA	NA	NA
8119993	0.0292994	971	0.987847	-0.0339568	HSP90AB1	TRUE	chr6	44247086	+	NA
8126770	0.0293137	972	0.987847	-0.0498369	CYP39A1	FALSE	chr6	46652830; 46652786; 46587143; 46587125; 46637885	-	NA
8159850	0.0293309	973	0.987847	-0.0657501	VLDLR-AS1	FALSE	chr9	2643359	-	NA
7917649	0.0294368	974	0.987847	-0.0567976	TGFBR3	FALSE	chr1	91886109	-	NA
8069559	0.0294387	975	0.987847	-0.0617228	RNU6-426P	FALSE	chr21	16035509	-	NA
7894501	0.0294752	976	0.987847	-0.0406262	NA	FALSE	NA	NA	NA	NA
7943882	0.0295498	977	0.987847	-0.0497663	PTS	FALSE	chr11	112226364	+	NA
7913415	0.0295527	978	0.987847	-0.0406073	USP48	FALSE	chr1	21783606	-	NA
8037495	0.0295904	979	0.987847	0.0483358	ZNF296	FALSE	chr19	45076588	-	NA
8012949	0.0296055	980	0.987847	0.165471	FBXW10	FALSE	chr17	18744023	+	NA
7894421	0.0296168	981	0.987847	-0.036312	NA	FALSE	NA	NA	NA	NA
7960637	0.0296174	982	0.987847	0.060149	LPAR5	FALSE	chr12	6631649	-	rs12296430; rs1800693
7970735	0.0297149	983	0.987847	0.0656681	RN7SL272P	FALSE	chr13	27989584	-	NA
7957386	0.0297252	984	0.987847	-0.04607	ACSS3	FALSE	chr12	81077210	+	NA
8177186	0.0297615	985	0.987847	-0.0538099	CDY2B	FALSE	NA	NA	NA	NA
8129309	0.0297617	986	0.987847	-0.141852	NA	FALSE	NA	NA	NA	NA
8065359	0.0297759	987	0.987847	0.088354	CD93	FALSE	chr20	23086340	-	NA
8155169	0.0297818	988	0.987847	-0.0460544	RECK	FALSE	chr9	36036432	+	NA
7917591	0.0297838	989	0.987847	-0.0615963	NA	FALSE	NA	NA	NA	NA
8150419	0.0297966	990	0.987847	0.24813	ZMAT4	FALSE	chr8	40897833	-	NA
8039664	0.0298013	991	0.987847	0.0600793	ZNF416	FALSE	chr19	57578927	-	NA
7910416	0.0298169	992	0.987847	0.0438481	URB2	FALSE	chr1	229626233	+	NA
8141708	0.0298378	993	0.987847	-0.046039	CLDN15	FALSE	chr7	101238820	-	NA
7893555	0.0298609	994	0.987847	-0.0757944	NA	FALSE	NA	NA	NA	NA
7916491	0.0298734	995	0.987847	0.192864	NA	FALSE	NA	NA	NA	NA
7893621	0.0299742	996	0.987847	0.197915	NA	FALSE	NA	NA	NA	NA
7954434	0.0299751	997	0.987847	0.0540138	RN7SL38P	FALSE	chr12	24706787	+	NA
7894207	0.0300409	998	0.987847	-0.0445399	NA	FALSE	NA	NA	NA	NA
8143065	0.030058	999	0.987847	0.0437823	C7orf49	FALSE	chr7	135170695; 135148163; 135169474; 135170524; 135170661; 135170695; 135170795; 135168179; 135170675; 135169459; 135169474; 135167809; 135170738; 135170511	-	NA
8168546	0.0301517	1000	0.987847	-0.050183	FAM46D	FALSE	NA	NA	NA	NA
8118995	0.0301527	1001	0.987847	-0.0536853	LHFPL5	FALSE	chr6	35805292	+	NA
8058273	0.0301603	1002	0.987847	-0.0565542	MPP4	FALSE	chr2	201698694	-	NA
8146307	0.0301623	1003	0.987847	-0.0919919	POTEA	FALSE	NA	NA	NA	NA
8138202	0.0301872	1004	0.987847	-0.0654181	ICA1	FALSE	chr7	8262281	-	NA
7920285	0.0301934	1005	0.987847	-0.0637278	S100A2	FALSE	chr1	153565865	-	NA
8180361	0.030378	1006	0.987847	0.0844098	NA	FALSE	NA	NA	NA	NA
8100578	0.0304041	1007	0.987847	-0.0444443	EPHA5	FALSE	chr4	65670495	-	NA
7955290	0.0304795	1008	0.987847	0.0420832	AQP2	FALSE	chr12	49950745	+	NA
7918759	0.0304926	1009	0.987847	-0.0403806	BCAS2	FALSE	chr1	114581639	-	NA
7892998	0.0305076	1010	0.987847	0.125603	NA	FALSE	NA	NA	NA	NA
7971933	0.0305777	1011	0.987847	-0.0965733	NA	FALSE	NA	NA	NA	NA
7895961	0.0305862	1012	0.987847	-0.115888	NA	FALSE	NA	NA	NA	NA
8143601	0.0306384	1013	0.987847	-0.04841	CTAGE15	FALSE	chr7	143571800	+	NA
8149942	0.0306405	1014	0.987847	0.0520182	CCDC25	FALSE	chr8	27772634	-	NA
8033825	0.0306697	1015	0.987847	0.0612301	COL5A3	FALSE	chr19	10010471	-	rs34536443; rs8112449
7971913	0.0307013	1016	0.987847	-0.104525	PPP1R2P10	FALSE	NA	NA	NA	NA
8165862	0.0307109	1017	0.987847	-0.0612625	NA	FALSE	NA	NA	NA	NA
7895643	0.0307241	1018	0.987847	-0.056368	NA	FALSE	NA	NA	NA	NA
8114814	0.030732	1019	0.987847	-0.0403238	NR3C1	FALSE	chr5	143390001; 143400852; 143401397; 143402737; 143403329; 143403689; 143403700; 143403882; 143404129; 143404544; 143404667; 143405323; 143434702; 143434772; 143434774; 143435512	-	NA
8156060	0.0307911	1020	0.987847	0.0374083	TLE4	FALSE	chr9	79572614	+	NA
7949763	0.0308455	1021	0.987847	-0.0686393	RNU6-1238P	FALSE	chr11	67395311	-	NA
7909144	0.0308522	1022	0.987847	-0.122435	LOC284581	FALSE	NA	NA	NA	NA
7895642	0.0308856	1023	0.987847	-0.0916115	NA	FALSE	NA	NA	NA	NA
8139031	0.0308867	1024	0.987847	-0.0916109	NA	FALSE	NA	NA	NA	NA
7939992	0.0309303	1025	0.987847	-0.0563006	OR5AR1	FALSE	chr11	56663685	+	NA
8143365	0.0309719	1026	0.987847	-0.111295	RNU6-797P	FALSE	chr7	140209671	-	NA
7948213	0.0310443	1027	0.987847	-0.0611446	PRG3	FALSE	chr11	57381150	-	NA
7998817	0.0311964	1028	0.987847	-0.0492866	CEMP1	FALSE	chr16	2531408	-	NA
7921346	0.0312138	1029	0.987847	-0.0805108	CD1B	FALSE	chr1	158331531	-	NA
7975705	0.0312471	1030	0.987847	0.0418868	ISCA2	FALSE	chr14	74493764	+	NA
7951679	0.0312596	1031	0.987847	0.0563457	TIMM8B	FALSE	chr11	112086795; 112086798; 112086798; 112086722	-	NA
8045083	0.0313075	1032	0.987847	0.0434487	SFT2D3	FALSE	chr2	127701507	+	NA
7976552	0.0313107	1033	0.987847	-0.140634	NA	FALSE	NA	NA	NA	NA
7973024	0.0313759	1034	0.987847	-0.0574626	OR4K17	FALSE	chr14	20117406	+	NA
7920472	0.0314084	1035	0.987847	-0.0561458	TPM3	FALSE	chr1	154183130	-	NA
8130209	0.0314214	1036	0.987847	-0.0709448	RNU6-813P	FALSE	chr6	151615879	-	NA
8156759	0.0314246	1037	0.987847	-0.104101	RNU6-918P	FALSE	chr9	98032229	+	NA
7979281	0.0314404	1038	0.987847	0.0517651	WDHD1	FALSE	chr14	55027105	-	NA
7960702	0.0314498	1039	0.987847	0.0562807	CDCA3	FALSE	chr12	6852066	-	rs12296430
8045142	0.0314598	1040	0.987847	0.0462131	MZT2B	FALSE	chr2	130181927	+	NA
8162388	0.0314961	1041	0.987847	-0.0649256	OMD	FALSE	chr9	92424461	-	NA
8109403	0.0314968	1042	0.987847	0.0562647	MFAP3	FALSE	chr5	154038958	+	NA
7930880	0.0315191	1043	0.987847	-0.0803718	NA	FALSE	NA	NA	NA	NA
8163273	0.0315447	1044	0.987847	-0.08325	OR2K2	FALSE	chr9	111328433	-	NA
7909332	0.0315464	1045	0.987847	0.0811539	CD55	FALSE	chr1	207321790	+	NA
8108256	0.0315777	1046	0.987847	-0.0632205	MYOT	FALSE	chr5	137867857	+	NA
7993148	0.0315879	1047	0.987847	0.0433754	PMM2	FALSE	chr16	8797816	+	NA
7979878	0.0316079	1048	0.987847	-0.0491701	SLC10A1	FALSE	chr14	69797289	-	NA
8056821	0.0316321	1049	0.987847	-0.0648755	RN7SL65P	FALSE	chr2	174240457	-	NA
8104499	0.0317775	1050	0.987847	0.0505221	ANKRD33B	FALSE	chr5	10564467	+	NA
8099027	0.0318078	1051	0.987847	-0.0911372	NA	FALSE	NA	NA	NA	NA
8050908	0.0318807	1052	0.987847	0.0310631	HADHA	TRUE	chr2	26244726	-	NA
8015665	0.0318851	1053	0.987847	0.0409449	PLEKHH3	FALSE	chr17	42676951	-	rs2293152; rs4796791; rs744166; rs9891119
8020653	0.0319077	1054	0.987847	-0.0559862	CABYR	FALSE	chr18	24139094	+	NA
8029321	0.0319309	1055	0.987847	0.0738593	ZNF283	FALSE	chr19	43827291	+	NA
8165277	0.0319799	1056	0.987847	-0.0454681	LCN6	FALSE	chr9	136748528	-	NA
8151341	0.0320915	1057	0.987847	-0.060781	TRPA1	FALSE	chr8	72075617	-	NA
7950895	0.0320973	1058	0.987847	-0.129871	NA	FALSE	NA	NA	NA	NA
8056999	0.032148	1059	0.987847	0.0796243	TTC30A	FALSE	chr2	177618966	-	NA
7893074	0.0322207	1060	0.987847	0.0723263	NA	FALSE	NA	NA	NA	NA
7896410	0.0322245	1061	0.987847	0.186348	NA	FALSE	NA	NA	NA	NA
7982086	0.032246	1062	0.987847	-0.0558793	SNORD115-40	FALSE	chr15	25243613	+	NA
8067157	0.0322834	1063	0.987847	0.0515044	CBLN4	FALSE	chr20	56005472	-	NA
7894756	0.0322951	1064	0.987847	-0.068639	NA	FALSE	NA	NA	NA	NA
7922130	0.0323557	1065	0.987847	-0.0558449	DPT	FALSE	chr1	168729264	-	NA
7895974	0.0323846	1066	0.987847	-0.0646011	NA	FALSE	NA	NA	NA	NA
7896343	0.0323867	1067	0.987847	0.0999229	NA	FALSE	NA	NA	NA	NA
7893720	0.0323878	1068	0.987847	-0.0736534	NA	FALSE	NA	NA	NA	NA
8041995	0.0324014	1069	0.987847	-0.103541	SPTBN1	FALSE	chr2	54456284	+	NA
7981373	0.0324061	1070	0.987847	-0.0769498	NA	FALSE	NA	NA	NA	NA
8110966	0.032416	1071	0.987847	0.064589	FAM173B	FALSE	chr5	10249897	-	NA
7953979	0.0324343	1072	0.987847	-0.102444	NA	FALSE	NA	NA	NA	NA
7927167	0.0324588	1073	0.987847	0.0559415	NA	FALSE	NA	NA	NA	NA
8124521	0.0324671	1074	0.987847	0.134014	HIST1H4K	FALSE	chr6	27831527	-	NA
7895123	0.0325009	1075	0.987847	-0.0736071	NA	FALSE	NA	NA	NA	NA
8058118	0.0325124	1076	0.987847	0.0459241	KCTD18	FALSE	chr2	200510063	-	NA
8074384	0.0325643	1077	0.987847	0.0415594	GSC2	FALSE	chr22	19150283	-	NA
7905060	0.0325798	1078	0.987847	0.0806484	FCGR1A	FALSE	chr1	149782689	+	NA
8002533	0.0326316	1079	0.987847	0.0513984	ZNF23	FALSE	chr16	71462214	-	NA
8081277	0.0326747	1080	0.987847	0.0415325	NIT2	FALSE	chr3	100334700	+	NA
8136971	0.0326943	1081	0.987847	-0.0798471	OR2A12	FALSE	chr7	144095047	+	NA
8175442	0.0326967	1082	0.987847	0.133825	LINC00889	FALSE	NA	NA	NA	NA
7895446	0.0327872	1083	0.987847	-0.090646	NA	FALSE	NA	NA	NA	NA
7933535	0.0328043	1084	0.987847	-0.0841581	NA	FALSE	NA	NA	NA	NA
7973156	0.0328286	1085	0.987847	-0.0488319	RNASE8	FALSE	chr14	21057821	+	NA
8169836	0.0328821	1086	0.987847	-0.0533605	XPNPEP2	FALSE	NA	NA	NA	NA
8097415	0.0328901	1087	0.987847	-0.0569739	NA	FALSE	NA	NA	NA	NA
8086462	0.0329292	1088	0.987847	0.0473676	POMGNT2	FALSE	chr3	43106076	-	NA
7895504	0.0329337	1089	0.987847	0.185523	NA	FALSE	NA	NA	NA	NA
7953569	0.0329493	1090	0.987847	0.0501725	PTPN6	FALSE	chr12	6951268	+	NA
8180368	0.0329516	1091	0.987847	-0.0556593	NA	FALSE	NA	NA	NA	NA
8109177	0.0329571	1092	0.987847	0.0688282	RN7SL868P	FALSE	chr5	149722069	+	NA
8052622	0.0329691	1093	0.987847	-0.0437953	NA	FALSE	NA	NA	NA	NA
7894201	0.0330136	1094	0.987847	-0.0840618	NA	FALSE	NA	NA	NA	NA
8168731	0.0330289	1095	0.987847	-0.0943627	NA	FALSE	NA	NA	NA	NA
8137228	0.0330552	1096	0.987847	0.0414403	ZNF775	FALSE	chr7	150379334	+	NA
8013570	0.0330695	1097	0.987847	0.0756096	NA	FALSE	chr17	28022464	-	NA
8126946	0.0330815	1098	0.987847	-0.10316	RPS17P5	FALSE	NA	NA	NA	NA
8109001	0.0331005	1099	0.987847	-0.0527886	SPINK5	FALSE	chr5	148063971	+	NA
8045664	0.0331619	1100	0.987847	0.0557105	LYPD6B	FALSE	chr2	149038466	+	NA
8167650	0.0331673	1101	0.987847	-0.0532761	CXorf67	FALSE	NA	NA	NA	NA
8151296	0.0332061	1102	0.987847	0.0687274	LACTB2	FALSE	chr8	70669157	-	NA
8075026	0.0332308	1103	0.987847	-0.0527505	PIWIL3	FALSE	chr22	24762523; 24774716; 24774477; 24774477; 24774720	-	NA
7893637	0.0332542	1104	0.987847	-0.109913	NA	FALSE	NA	NA	NA	NA
8121031	0.0332717	1105	0.987847	-0.0451393	SLC35A1	FALSE	chr6	87472924	+	NA
8141016	0.0332818	1106	0.987847	-0.0568506	TFPI2	FALSE	chr7	93890991; 93890170; 93890753	-	NA
8056995	0.0332896	1107	0.987847	0.113548	TTC30B	FALSE	chr2	177553014	-	NA
8060611	0.0332996	1108	0.987847	0.0472655	ITPA	FALSE	chr20	3209524	+	NA
8074688	0.0333299	1109	0.987847	0.0413743	THAP7	FALSE	chr22	21002196	-	NA
8110865	0.0333439	1110	0.987847	0.0472534	IRX4	FALSE	chr5	1887236	-	NA
8160870	0.0333479	1111	0.987847	0.04137	CCL27	FALSE	chr9	34662692	-	NA
7955637	0.0333605	1112	0.987847	0.055646	KRT18	FALSE	chr12	52948963	+	NA
8149847	0.0333655	1113	0.987847	0.050051	NA	FALSE	NA	NA	NA	NA
7945357	0.0333741	1114	0.987847	0.0413638	SIRT3	FALSE	chr11	236834	-	NA
8040712	0.0333857	1115	0.987847	0.0518178	CENPA	FALSE	chr2	26786067	+	NA
8103466	0.0334062	1116	0.987847	-0.0568117	FSTL5	FALSE	chr4	162163966	-	NA
8025998	0.033417	1117	0.987847	0.0472334	ZNF136	FALSE	chr19	12163063	+	NA
7896409	0.0334191	1118	0.987847	-0.128956	NA	FALSE	NA	NA	NA	NA
8051985	0.0334578	1119	0.987847	0.0556145	RN7SL414P	FALSE	chr2	45569492	-	NA
7932788	0.0335357	1120	0.987847	-0.052662	RN7SKP39	FALSE	chr10	28442896	-	NA
8175537	0.0335471	1121	0.987847	0.0471979	SPANXA2-OT1	FALSE	NA	NA	NA	NA
8162669	0.0335762	1122	0.987847	0.0587253	ZNF322	FALSE	chr6	26659752	-	NA
8124574	0.0336483	1123	0.987847	0.0587008	ZSCAN12	FALSE	chr6	28399734; 28399731	-	NA
8022342	0.0336783	1124	0.987847	0.0367759	AFG3L2	TRUE	chr18	12377314	-	NA
8122058	0.033687	1125	0.987847	-0.0531239	ARG1	FALSE	chr6	131573143	+	NA
8139033	0.0337529	1126	0.987847	-0.0641158	AOAH	FALSE	chr7	36724449	-	NA
7974781	0.0338165	1127	0.987847	-0.0330808	PPM1A	FALSE	chr14	60245751	+	NA
8168468	0.0338265	1128	0.987847	-0.113857	RNU6-854P	FALSE	NA	NA	NA	NA
8176280	0.0338265	1129	0.987847	-0.113857	RNU6-854P	FALSE	NA	NA	NA	NA
8024527	0.0339385	1130	0.987847	0.0516527	ZNF556	FALSE	chr19	2867334	+	NA
8106771	0.0339528	1131	0.987847	-0.0938951	NBPF22P	FALSE	NA	NA	NA	NA
8056710	0.0340565	1132	0.987847	-0.0566103	CCDC173	FALSE	chr2	169694433	-	NA
8136293	0.0341016	1133	0.987847	-0.0392689	EXOC4	FALSE	chr7	133253072	+	NA
7980338	0.034106	1134	0.987847	0.0470466	IRF2BPL	FALSE	chr14	77028699	-	NA
8053610	0.034135	1135	0.987847	-0.0330229	LOC285074	FALSE	NA	NA	NA	NA
7911383	0.0341471	1136	0.987847	0.0341483	C1orf159	FALSE	chr1	1116081; 1092077; 1116095; 1116098; 1087636; 1116089; 1116089; 1084072; 1092174; 1106127; 1116095; 1116243; 1116356; 1092294; 1116361; 1092813; 1092813; 1116087; 1116089	-	NA
7894225	0.0341668	1137	0.987847	-0.0739871	NA	FALSE	NA	NA	NA	NA
8040479	0.0342483	1138	0.987847	0.0366566	GDF7	FALSE	chr2	20666663	+	NA
7952522	0.0342699	1139	0.987847	0.058491	PUS3	FALSE	chr11	125903221	-	NA
7893150	0.0342967	1140	0.987847	-0.117033	NA	FALSE	NA	NA	NA	NA
7961569	0.0343264	1141	0.987847	0.0728233	RNU6-251P	FALSE	chr12	15671810	-	NA
8180310	0.0343684	1142	0.987847	-0.0355037	NA	FALSE	NA	NA	NA	NA
7917455	0.0345287	1143	0.987847	-0.0275823	2015-09-01	FALSE	chr1	86914365	-	NA
8128618	0.0345499	1144	0.987847	-0.0790501	RNU6-117P	FALSE	chr6	106739054	-	NA
8160274	0.0345809	1145	0.987847	-0.120003	MGC24103	FALSE	NA	NA	NA	NA
8132743	0.0345945	1146	0.987847	-0.0394558	ABCA13	FALSE	chr7	48171459	+	NA
7894384	0.0346153	1147	0.987847	-0.109125	NA	FALSE	NA	NA	NA	NA
8180403	0.0347021	1148	0.987847	0.058347	NA	FALSE	NA	NA	NA	NA
7893501	0.0347426	1149	0.987847	-0.12807	NA	FALSE	NA	NA	NA	NA
7896110	0.0347758	1150	0.987847	-0.102237	NA	FALSE	NA	NA	NA	NA
8029640	0.0348007	1151	0.987847	0.0468615	BLOC1S3	FALSE	chr19	45178744	+	NA
8168646	0.0348865	1152	0.987847	0.0513748	TGIF2LX	FALSE	NA	NA	NA	NA
8139484	0.0349106	1153	0.987847	0.0557135	SNORA5C	FALSE	chr7	45105042	-	NA
8095646	0.0349537	1154	0.987847	-0.0598359	AFP	FALSE	chr4	73436162	+	NA
8146130	0.035003	1155	0.987847	0.0582477	GINS4	FALSE	chr8	41529205	+	NA
8176681	0.0350141	1156	0.987847	-0.0550384	HSFY1	FALSE	NA	NA	NA	NA
8177201	0.0350141	1157	0.987847	-0.0550384	HSFY1	FALSE	NA	NA	NA	NA
8061645	0.0350895	1158	0.987847	-0.0831336	RNU1-94P	FALSE	chr20	31901253	+	NA
8152512	0.0351509	1159	0.987847	0.0550792	TNFRSF11B	FALSE	chr8	118952200	-	NA
7915995	0.0351522	1160	0.987847	-0.0328409	FAF1	FALSE	chr1	50960263	-	NA
8091629	0.0351788	1161	0.987847	0.0679508	C3orf33	FALSE	chr3	155806272	-	NA
7894419	0.0351959	1162	0.987847	0.113603	NA	FALSE	NA	NA	NA	NA
8087691	0.0352454	1163	0.987847	-0.0669958	CACNA2D2	FALSE	chr3	50503597	-	NA
7914750	0.0353058	1164	0.987847	0.0409131	SMIM12	FALSE	chr1	34859069	-	NA
8151367	0.0353089	1165	0.987847	-0.119554	RNU6-285P	FALSE	chr8	73019044	-	NA
7969770	0.0353191	1166	0.987847	-0.0669697	RNU6-83P	FALSE	chr13	99025233	+	rs4772201
8149350	0.0353213	1167	0.987847	-0.0526579	DEFB134	FALSE	chr8	11996312; 11996312	-	NA
7944869	0.0353236	1168	0.987847	0.0506105	SPA17	FALSE	chr11	124673797	+	NA
8060101	0.0353335	1169	0.987847	-0.0446363	PP14571	FALSE	chr2	240456700	-	NA
7967622	0.0353423	1170	0.987847	-0.0894202	NA	FALSE	NA	NA	NA	NA
8102404	0.0353623	1171	0.987847	-0.0562155	MIR302A	FALSE	chr4	112648251	-	NA
8067877	0.0353734	1172	0.987847	-0.0407099	ABCC13	FALSE	NA	NA	NA	NA
8133085	0.0353741	1173	0.987847	-0.0635617	NA	FALSE	NA	NA	NA	NA
8072626	0.0353959	1174	0.987847	-0.0635544	TIMP3	FALSE	chr22	32801700	+	NA
8136936	0.0354351	1175	0.987847	-0.0481439	CTAGE15	FALSE	chr7	143571800	+	NA
8031576	0.0354774	1176	0.987847	-0.0471232	NLRP4	FALSE	chr19	55836577	+	NA
8108720	0.0355092	1177	0.987847	-0.048125	PCDHB9	FALSE	chr5	141187126	+	NA
7894758	0.0355986	1178	0.987847	0.0408467	NA	FALSE	NA	NA	NA	NA
7931293	0.0356088	1179	0.987847	-0.038535	DOCK1	FALSE	chr10	126905455	+	NA
8032088	0.0356317	1180	0.987847	0.131515	PRSS57	FALSE	chr19	695498	-	NA
8106393	0.035649	1181	0.987847	-0.0828913	F2R	FALSE	chr5	76716042	+	NA
7906746	0.0356604	1182	0.987847	-0.0734049	SDHC	FALSE	chr1	161314380	+	NA
8144880	0.0356954	1183	0.987847	-0.0480775	SH2D4A	FALSE	chr8	19313975	+	NA
8041048	0.0357277	1184	0.987847	-0.0525449	FOSL2	FALSE	chr2	28392857	+	NA
8067858	0.03574	1185	0.987847	-0.0828522	RNU6-286P	FALSE	chr21	13621576	+	NA
7894053	0.0357666	1186	0.987847	0.159273	NA	FALSE	NA	NA	NA	NA
8023864	0.0357797	1187	0.987847	-0.0723218	FAM69C	FALSE	chr18	74457268	-	NA
7950016	0.0357915	1188	0.987847	0.046603	ORAOV1	FALSE	chr11	69675347	-	NA
7895914	0.0358504	1189	0.987847	-0.128212	NA	FALSE	NA	NA	NA	NA
8041640	0.035874	1190	0.987847	0.088529	LINC01126	FALSE	chr2	43227209	+	rs12466022; rs2163226; rs6718520
8072009	0.0358902	1191	0.987847	-0.0560594	CRYBB2P1	FALSE	NA	NA	NA	NA
7921895	0.035902	1192	0.987847	-0.0547806	C1orf111	FALSE	chr1	162376870	-	NA
7896255	0.0359168	1193	0.987847	-0.101636	NA	FALSE	NA	NA	NA	NA
7895475	0.0359267	1194	0.987847	0.0407728	NA	FALSE	NA	NA	NA	NA
8177096	0.0359478	1195	0.987847	-0.0732952	RBMY1A3P	FALSE	NA	NA	NA	NA
7926486	0.0359644	1196	0.987847	-0.0470021	SLC39A12	FALSE	chr10	17951838	+	NA
8168018	0.0361209	1197	0.987847	-0.0391354	YIPF6	FALSE	NA	NA	NA	NA
8001211	0.0361449	1198	0.987847	-0.0384257	ITFG1	FALSE	chr16	47461274	-	NA
7895876	0.0361866	1199	0.987847	-0.159948	NA	FALSE	NA	NA	NA	NA
7950140	0.0362025	1200	0.987847	0.0464976	LOC220077	FALSE	NA	NA	NA	NA
7934091	0.036272	1201	0.987847	-0.0889925	NA	FALSE	NA	NA	NA	NA
7894696	0.0362851	1202	0.987847	-0.0731674	NA	FALSE	NA	NA	NA	NA
8102415	0.0363061	1203	0.987847	0.0509706	CAMK2D	FALSE	chr4	113761068	-	NA
8141166	0.036309	1204	0.987847	0.050335	LOC441268	FALSE	NA	NA	NA	NA
8100013	0.0363119	1205	0.987847	-0.0731574	RNU1-49P	FALSE	chr4	41772103	-	NA
7969861	0.0364067	1206	0.987847	-0.0429897	ITGBL1	FALSE	chr13	101452666	+	NA
8176832	0.0364445	1207	0.987847	-0.046884	DAZ4	FALSE	NA	NA	NA	NA
8176878	0.0364445	1208	0.987847	-0.046884	DAZ4	FALSE	NA	NA	NA	NA
8177354	0.0364445	1209	0.987847	-0.046884	DAZ4	FALSE	NA	NA	NA	NA
8130539	0.0365239	1210	0.987847	0.0577569	TAGAP	FALSE	chr6	159045152; 159045152; 159045018	-	rs1738074; rs212405
8156261	0.0365605	1211	0.987847	-0.160803	NA	FALSE	NA	NA	NA	NA
7985023	0.0365978	1212	0.987847	-0.0545823	NA	FALSE	NA	NA	NA	NA
8126629	0.0367882	1213	0.987847	0.0291759	GTPBP2	FALSE	chr6	43627353	-	NA
8023246	0.0367961	1214	0.987847	0.0463472	C18orf32	FALSE	chr18	49487231	-	NA
7893595	0.0368281	1215	0.987847	-0.160594	NA	FALSE	NA	NA	NA	NA
7940622	0.0368382	1216	0.987847	-0.0557837	SCGB1D1	FALSE	chr11	62190215	+	NA
8034408	0.0368508	1217	0.987847	0.0405677	ZNF490	FALSE	chr19	12610803	-	NA
7959282	0.0368529	1218	0.987847	0.0344508	RNF34	FALSE	chr12	121400040	+	NA
8083777	0.0368604	1219	0.987847	0.0490788	NA	FALSE	NA	NA	NA	NA
8078270	0.0368649	1220	0.987847	0.0302014	RPL15	TRUE	chr3	23916544; 23916590; 23916803; 23916803; 23916978; 23917130; 23917146; 23917147; 23917147; 23917147; 23917147; 23917704; 23917846	+	NA
7893080	0.03697	1221	0.987847	0.112465	NA	FALSE	NA	NA	NA	NA
7896558	0.036997	1222	0.987847	-0.0780521	NA	FALSE	NA	NA	NA	NA
8014158	0.0369992	1223	0.987847	-0.0630274	RNA5SP438	FALSE	chr17	34120167	-	NA
7943917	0.0370165	1224	0.987847	-0.107796	NA	FALSE	NA	NA	NA	NA
8031949	0.0370194	1225	0.987847	0.0405308	ZNF324B	FALSE	chr19	58451603	+	NA
8115168	0.0370552	1226	0.987847	-0.0382434	RBM22	FALSE	chr5	150701107	-	NA
8064438	0.0370649	1227	0.987847	-0.0389429	NSFL1C	FALSE	chr20	1466918	-	NA
8152148	0.0370942	1228	0.987847	-0.0348286	UBR5	FALSE	chr8	102412689	-	NA
8019316	0.0371001	1229	0.987847	0.0360843	PYCR1	FALSE	chr17	81937328	-	NA
7968295	0.0371321	1230	0.987847	-0.115356	RNU6-82P	FALSE	chr13	28232500	+	NA
8020804	0.0371459	1231	0.987847	-0.0668869	RNU6-1050P	FALSE	chr18	31937532	+	NA
8030148	0.0372908	1232	0.987847	0.0462234	DHDH	FALSE	chr19	48933681	+	rs2303759; rs8107548
7899627	0.0373221	1233	0.987847	0.0404649	TINAGL1	FALSE	chr1	31576484	+	NA
7951008	0.0373712	1234	0.987847	0.0500451	TAF1D	FALSE	chr11	93741945	-	NA
8151306	0.0373815	1235	0.987847	0.0877908	RN7SL19P	FALSE	chr8	70654883	-	NA
7896083	0.0373899	1236	0.987847	-0.127235	NA	FALSE	NA	NA	NA	NA
7893393	0.0374063	1237	0.987847	0.0588974	NA	FALSE	NA	NA	NA	NA
7952893	0.0374428	1238	0.987847	0.0279166	IQSEC3	FALSE	chr12	66764; 77375; 168977; 169054; 176481	+	NA
7915516	0.0374516	1239	0.987847	0.0461834	MED8	FALSE	chr1	43389784	-	NA
8129134	0.0374668	1240	0.987847	-0.040266	ROS1	FALSE	chr6	117425855	-	NA
7931159	0.037507	1241	0.987847	-0.0555929	PSTK	FALSE	chr10	122980039	+	NA
8175039	0.0375374	1242	0.987847	-0.032431	ELF4	FALSE	NA	NA	NA	NA
7991323	0.0376157	1243	0.987847	0.0574153	PEX11A	FALSE	chr15	89690662	-	NA
7895691	0.0376485	1244	0.987847	0.0771601	NA	FALSE	NA	NA	NA	NA
7894728	0.0376626	1245	0.987847	0.112034	NA	FALSE	NA	NA	NA	NA
7901212	0.0377371	1246	0.987847	-0.0515061	UQCRH	TRUE	chr1	46303630	+	NA
8043564	0.037892	1247	0.987847	0.054258	FAHD2A	FALSE	chr2	95402725	+	NA
8141311	0.0379165	1248	0.987847	0.0842358	FAM200A	FALSE	chr7	99552134	-	NA
7981750	0.0379697	1249	0.987847	0.0547855	LOC400968	FALSE	NA	NA	NA	NA
8006345	0.0380727	1250	0.987847	-0.0380441	RHOT1	FALSE	chr17	32142536	+	NA
7898184	0.0381041	1251	0.987847	0.0541966	CELA2B	FALSE	chr1	15476100	+	NA
8094148	0.0381079	1252	0.987847	0.0659232	FAM86MP	FALSE	NA	NA	NA	NA
7971015	0.0382468	1253	0.987847	0.0519427	SMAD9	FALSE	chr13	36920272	-	NA
7925058	0.0382529	1254	0.987847	-0.0588242	SNRPD2P2	FALSE	NA	NA	NA	NA
7902738	0.0382563	1255	0.987847	-0.0553824	CLCA4	FALSE	chr1	86547077	+	NA
7934334	0.0382839	1256	0.987847	-0.0541145	TTC18	FALSE	NA	NA	NA	NA
7893169	0.0383323	1257	0.987847	-0.0926937	NA	FALSE	NA	NA	NA	NA
7955419	0.0383608	1258	0.987847	-0.0664784	RNU6-238P	FALSE	chr12	50656972	+	NA
8157214	0.0383645	1259	0.987847	-0.0659323	RNU6-1013P	FALSE	chr9	111839827	+	NA
7979691	0.0383799	1260	0.987847	-0.0880556	LOC100128233	FALSE	NA	NA	NA	NA
7927972	0.0383853	1261	0.987847	0.0444461	VPS26A	FALSE	chr10	69124151	+	NA
8026982	0.0384045	1262	0.987847	0.03601	MPV17L2	FALSE	chr19	18193181	+	rs11554159; rs874628
7893917	0.0384277	1263	0.987847	0.183073	NA	FALSE	NA	NA	NA	NA
7992685	0.0384835	1264	0.987847	0.0399062	KCTD5	FALSE	chr16	2682474	+	NA
7925170	0.0385396	1265	0.987847	-0.0664191	PP2672	FALSE	NA	NA	NA	NA
8063014	0.0385438	1266	0.987847	-0.0587386	WFDC13	FALSE	chr20	45702015	+	rs2425752; rs4810485; rs6074022
7892820	0.038563	1267	0.987847	-0.0540388	NA	FALSE	NA	NA	NA	NA
8107934	0.0385713	1268	0.987847	-0.0418306	C5orf56	FALSE	chr5	132410980; 132410988; 132419863; 132410980; 132410988; 132470531; 132410635	+	NA
8007865	0.0385826	1269	0.987847	-0.0658607	RN7SL199P	FALSE	chr17	46537533	+	NA
8007883	0.0385826	1270	0.987847	-0.0658607	RN7SL199P	FALSE	chr17	46537533	+	NA
7922821	0.0386621	1271	0.987847	-0.0438742	NA	FALSE	NA	NA	NA	NA
8148932	0.038688	1272	0.987847	0.0357818	ZNF517	FALSE	chr8	144798875	+	NA
8089988	0.0387008	1273	0.987847	0.0657152	CCDC58	FALSE	chr3	122383231	-	rs2255214; rs9282641
8079204	0.0387286	1274	0.987847	0.0485914	ZNF197	FALSE	chr3	44625048	+	NA
7975876	0.0387585	1275	0.987847	0.0503034	ESRRB	FALSE	chr14	76404428	+	NA
8008064	0.038761	1276	0.987847	0.0496764	PNPO	FALSE	chr17	47941570	+	rs4239162; rs4794058
7936115	0.0388042	1277	0.987847	-0.0712211	SH3PXD2A	FALSE	chr10	103855406	-	NA
7894951	0.0388731	1278	0.987847	-0.0424503	NA	FALSE	NA	NA	NA	NA
7987010	0.0388855	1279	0.987847	-0.110989	SYT2	FALSE	chr1	202643453	-	NA
8110668	0.0389025	1280	0.987847	0.0766424	RNU6-705P	FALSE	chr5	181301966	+	NA
8153486	0.038918	1281	0.987847	0.0496355	CCDC166	FALSE	chr8	143708109	-	NA
8018078	0.038937	1282	0.987847	-0.0711744	NA	FALSE	chr17	69355218	-	NA
8048120	0.0389575	1283	0.987847	0.0502509	ATIC	FALSE	chr2	215311816	+	NA
7972215	0.0390601	1284	0.987847	-0.0711313	RNA5SP33	FALSE	chr13	79389631	-	NA
8157144	0.0391061	1285	0.987847	0.0583667	FAM206A	FALSE	chr9	108934180	+	NA
8175775	0.039115	1286	0.987847	-0.0511506	MAGEA1	FALSE	NA	NA	NA	NA
8061746	0.0391409	1287	0.987847	0.0495776	DNMT3B	FALSE	chr20	32762595	+	NA
8124756	0.0391693	1288	0.987847	0.0356922	PPP1R10	TRUE	chr6	30617244	-	NA
8178358	0.0391693	1289	0.987847	0.0356922	PPP1R10	TRUE	chr6	30617244	-	NA
8179664	0.0391693	1290	0.987847	0.0356922	PPP1R10	TRUE	chr6	30617244	-	NA
8138224	0.0391719	1291	0.987847	-0.0511361	NDUFA4	FALSE	chr7	10940256	-	NA
7918367	0.0391896	1292	0.987847	-0.0538704	GNAT2	FALSE	chr1	109613057	-	NA
8025563	0.0392019	1293	0.987847	0.0484711	P2RY11	FALSE	chr19	10111537	+	rs34536443; rs8112449
7894131	0.0392306	1294	0.987847	-0.0585385	NA	FALSE	NA	NA	NA	NA
7894926	0.0392344	1295	0.987847	-0.0472138	NA	FALSE	NA	NA	NA	NA
7973840	0.0392726	1296	0.987847	-0.0430433	ARHGAP5	FALSE	chr14	32077288	+	NA
8169715	0.0393158	1297	0.987847	-0.0550907	NA	FALSE	NA	NA	NA	NA
7950753	0.0393481	1298	0.987847	-0.043724	CCDC90B	FALSE	chr11	83286390	-	NA
8105191	0.0393662	1299	0.987847	0.0457189	PARP8	FALSE	chr5	50665898	+	NA
7963121	0.0393813	1300	0.987847	0.0415344	NCKAP5L	FALSE	chr12	49797002	-	NA
8169009	0.0394034	1301	0.987847	-0.0622718	BEX4	FALSE	NA	NA	NA	NA
7910587	0.0394272	1302	0.987847	-0.0538071	RNU6-1211P	FALSE	chr1	232700203	+	NA
8151768	0.0394456	1303	0.987847	-0.0423293	RUNX1T1	FALSE	chr8	92095613	-	NA
8007310	0.0394671	1304	0.987847	-0.0709894	HMGB3P27	FALSE	NA	NA	NA	NA
8059731	0.0394683	1305	0.987847	-0.0384708	PDE6D	FALSE	chr2	231781291	-	NA
8057563	0.0394717	1306	0.987847	-0.0510602	ZSWIM2	FALSE	chr2	186849170	-	NA
7903227	0.0395134	1307	0.987847	-0.0622382	PALMD	FALSE	chr1	99645942	+	NA
8141241	0.0395149	1308	0.987847	-0.0423147	SMURF1	FALSE	chr7	99144019; 99144100; 99081427; 99144019	-	NA
7952036	0.0396435	1309	0.987847	0.0663238	MPZL3	FALSE	chr11	118252347	-	rs533646
8176671	0.0397252	1310	0.987847	-0.0476648	CDY2B	FALSE	NA	NA	NA	NA
7996908	0.0397412	1311	0.987847	0.0399537	SNTB2	FALSE	chr16	69187128	+	NA
7932883	0.0398371	1312	0.987847	0.0774456	NA	FALSE	NA	NA	NA	NA
8030871	0.0398708	1313	0.987847	0.0493901	ZNF613	FALSE	chr19	51927219	+	NA
8067836	0.0398747	1314	0.987847	0.110702	LINC00314	FALSE	chr21	28013362	+	NA
8010113	0.0399054	1315	0.987847	0.03992	MGAT5B	FALSE	chr17	76868455	+	NA
7894755	0.0399082	1316	0.987847	0.12416	NA	FALSE	NA	NA	NA	NA
8174985	0.0399173	1317	0.987847	-0.0621154	SMARCA1	FALSE	NA	NA	NA	NA
8026915	0.0399177	1318	0.987847	0.0399175	ARRDC2	FALSE	chr19	18001131; 18007181; 18007239; 18008167; 18008167; 18008169; 18008169; 18008169; 18009548	+	rs11554159; rs874628
7916832	0.0399213	1319	0.987847	-0.0621142	NA	FALSE	chr1	67102779	-	NA
8124518	0.0399408	1320	0.987847	-0.151188	HIST1H2AJ	FALSE	chr6	27814740	-	NA
8136200	0.0399806	1321	0.987847	0.0619356	CPA4	FALSE	chr7	130293133	+	NA
8032094	0.0399858	1322	0.987847	0.0399035	LPPR3	FALSE	NA	NA	NA	NA
7894113	0.0399914	1323	0.987847	0.233581	NA	FALSE	NA	NA	NA	NA
8112801	0.039999	1324	0.987847	-0.0996093	RNU6-183P	FALSE	chr5	78315025	-	NA
8042519	0.0400129	1325	0.987847	-0.0435806	PCYOX1	FALSE	chr2	70258136	+	NA
8073207	0.0400293	1326	0.987847	0.0566895	FAM83F	FALSE	chr22	40009687	+	NA
8099037	0.0400676	1327	0.987847	-0.0380727	MFSD10	TRUE	chr4	2934458	-	NA
8055021	0.0401224	1328	0.987847	0.0395685	IWS1	FALSE	chr2	127526468	-	NA
8163956	0.0401562	1329	0.987847	-0.047564	OR1J1	FALSE	chr9	122477926	-	NA
7987114	0.0401943	1330	0.987847	-0.0872829	GOLGA8I	FALSE	NA	NA	NA	NA
7892585	0.0402539	1331	0.987847	0.155327	NA	FALSE	NA	NA	NA	NA
7928543	0.0402584	1332	0.987847	-0.0469762	RNA5SP321	FALSE	chr10	77587048	+	NA
8151215	0.0402599	1333	0.987847	-0.0909599	RPS15AP25	FALSE	NA	NA	NA	NA
8117578	0.0402708	1334	0.987847	-0.0620087	RNU6-471P	FALSE	chr6	27596411	+	NA
8176815	0.0402716	1335	0.987847	-0.125491	RBMY2AP	FALSE	NA	NA	NA	NA
8036820	0.0402837	1336	0.987847	0.0661036	ZNF780A	FALSE	chr19	40090888; 40090938; 40090903; 40090938; 40090888; 40090235; 40090938; 40090235; 40090457; 40090938; 40090860	-	NA
7903026	0.0403039	1337	0.987847	-0.0513413	RNU6-210P	FALSE	chr1	93010256	+	rs11810217
7933931	0.0403538	1338	0.987847	0.0651496	NA	FALSE	NA	NA	NA	NA
7981215	0.0403539	1339	0.987847	-0.113575	NA	FALSE	NA	NA	NA	NA
7941621	0.0403579	1340	0.987847	0.0398277	DPP3	FALSE	chr11	66480437	+	NA
7958017	0.0403725	1341	0.987847	0.0772299	RNA5SP369	FALSE	chr12	101836819	+	NA
8068120	0.0404438	1342	0.987847	-0.0619568	BACH1	FALSE	chr21	29596039	+	NA
8066475	0.0404553	1343	0.987847	-0.0581889	KCNS1	FALSE	chr20	45101112	-	NA
8142230	0.0405175	1344	0.987847	-0.0581714	NA	FALSE	NA	NA	NA	NA
8088956	0.0405329	1345	0.987847	-0.0619302	NA	FALSE	NA	NA	NA	NA
8094688	0.0406188	1346	0.987847	0.0481183	LIAS	FALSE	chr4	39459071	+	NA
8041383	0.0406318	1347	0.987847	-0.0619006	LTBP1	FALSE	chr2	33134656	+	NA
8020668	0.0406563	1348	0.987847	0.0481091	IMPACT	FALSE	chr18	24426741	+	NA
8148607	0.0406867	1349	0.987847	0.0355888	GLI4	FALSE	chr8	143267436	+	NA
8096556	0.0407371	1350	0.987847	0.0354068	METAP1	FALSE	chr4	98995619	+	NA
8079950	0.0408149	1351	0.987847	-0.0267014	GNAI2	TRUE	chr3	50246893	+	NA
7894351	0.0408668	1352	0.987847	-0.0992007	NA	FALSE	NA	NA	NA	NA
7909661	0.040888	1353	0.987847	-0.0395837	RPS6KC1	FALSE	chr1	213051254	+	NA
7898448	0.0409144	1354	0.987847	0.0658896	PADI4	FALSE	chr1	17308194	+	NA
7968514	0.0409268	1355	0.987847	-0.0715028	N4BP2L1	FALSE	chr13	32428133; 32428178; 32428178; 32428014; 32428311; 32411606; 32428130; 32428133; 32428014; 32428130; 32428006; 32428014	-	NA
8050689	0.040929	1356	0.987847	0.0453539	C2orf44	FALSE	chr2	24047361	-	NA
8089867	0.0409372	1357	0.987847	0.045352	RABL3	FALSE	chr3	120742537	-	NA
7935270	0.0409418	1358	0.987847	-0.0546554	BLNK	FALSE	chr10	96271540	-	NA
8149413	0.0409656	1359	0.987847	-0.0381888	DLC1	FALSE	chr8	13116244	-	NA
7980580	0.0409849	1360	0.987847	0.0564124	GALC	FALSE	chr14	87993271	-	rs2119704; rs74796499
7921367	0.041054	1361	0.987847	-0.0419969	SPTA1	FALSE	chr1	158686698	-	NA
8008547	0.0410822	1362	0.987847	-0.0656011	TOM1L1	FALSE	chr17	54900512	+	NA
7903162	0.0410893	1363	0.987847	-0.0580114	TMEM56	FALSE	chr1	95117337; 95117438; 95117922; 95140671	+	NA
7892764	0.0410895	1364	0.987847	-0.0395451	NA	FALSE	NA	NA	NA	NA
8042874	0.0411652	1365	0.987847	0.0389227	TTC31	FALSE	chr2	74483088	+	NA
8057898	0.0411763	1366	0.987847	-0.047329	HECW2	FALSE	chr2	196592611	-	NA
7895094	0.041268	1367	0.987847	-0.0990142	NA	FALSE	NA	NA	NA	NA
7961503	0.0412919	1368	0.987847	-0.0655355	SMCO3	FALSE	chr12	14814182	-	NA
7938195	0.0413667	1369	0.987847	-0.0533022	NLRP14	FALSE	chr11	7020445	+	NA
7926889	0.041425	1370	0.987847	-0.0989416	LYZL1	FALSE	chr10	29289060	+	NA
8105121	0.0414281	1371	0.987847	-0.0532866	GHR	FALSE	chr5	42423776	+	NA
7986329	0.0414459	1372	0.987847	0.0452358	NR2F2	FALSE	chr15	96330716	+	NA
7960544	0.0414726	1373	0.987847	-0.0505659	VAMP1	TRUE	chr12	6470677	-	rs12296430; rs1800693
8005064	0.0415006	1374	0.987847	0.0614555	ARHGAP44	FALSE	chr17	12789538	+	NA
8096875	0.0415497	1375	0.987847	-0.0544964	ENPEP	FALSE	chr4	110476072	+	NA
8057711	0.0415742	1376	0.987847	-0.0578771	NA	FALSE	NA	NA	NA	NA
8094460	0.0415877	1377	0.987847	0.035428	RBPJ	FALSE	chr4	26319709	+	NA
7976012	0.041601	1378	0.987847	-0.0418863	NRXN3	FALSE	chr14	78243601; 78278642; 78403730; 78698219; 78645119; 78614931; 78614931; 79298794; 79280501; 79314050; 78170372; 78242390; 78403749; 78243036; 79280262; 79279338; 79279905; 79279412	+	NA
7905496	0.0416751	1379	0.987847	-0.0702406	LINC00302	FALSE	chr1	152655476	+	NA
8135080	0.0417076	1380	0.987847	0.0562066	AP1S1	FALSE	chr7	101154396	+	NA
8053797	0.0417106	1381	0.987847	-0.0762759	ANKRD36C	FALSE	chr2	95855377; 95859929; 95907499; 95944694; 95945121; 95991793; 95991793; 95991831	-	NA
8019924	0.0417697	1382	0.987847	0.0436806	MYL12A	FALSE	chr18	3247529	+	NA
7909422	0.0417728	1383	0.987847	-0.0653862	MIR205	FALSE	chr1	209432132	+	NA
7895635	0.0417729	1384	0.987847	0.179764	NA	FALSE	NA	NA	NA	NA
8090936	0.0417883	1385	0.987847	-0.0544346	RNA5SP142	FALSE	chr3	137518255	-	NA
8026564	0.0417978	1386	0.987847	0.0436745	KLF2	FALSE	chr19	16324816	+	rs1870071
8180272	0.0418136	1387	0.987847	0.0575609	NA	FALSE	NA	NA	NA	NA
7896275	0.0418321	1388	0.987847	-0.115838	NA	FALSE	NA	NA	NA	NA
8123717	0.0418572	1389	0.987847	0.0754773	RPP40	FALSE	chr6	5004036	-	NA
7896010	0.0418574	1390	0.987847	-0.115825	NA	FALSE	NA	NA	NA	NA
8032637	0.0419371	1391	0.987847	0.0395123	CACTIN	FALSE	chr19	3626815	-	NA
7897974	0.0419547	1392	0.987847	-0.0504498	PRAMEF12	FALSE	chr1	12774840	+	NA
8098423	0.0419605	1393	0.987847	0.0947602	NEIL3	FALSE	chr4	177309835	+	NA
7893015	0.0419913	1394	0.987847	0.0436324	NA	FALSE	NA	NA	NA	NA
7942932	0.0419997	1395	0.987847	-0.0431635	C11orf73	FALSE	chr11	86302222	+	NA
7894258	0.0420059	1396	0.987847	0.0451093	NA	FALSE	NA	NA	NA	NA
7968516	0.0420174	1397	0.987847	-0.0341452	PDS5B	FALSE	chr13	32586426	+	NA
7957954	0.042051	1398	0.987847	-0.0701164	RNU6-1068P	FALSE	chr12	101411356	+	NA
7969533	0.0420612	1399	0.987847	-0.0465698	SLAIN1	FALSE	chr13	77697853	+	NA
7916743	0.0421473	1400	0.987847	-0.0614553	RNU6-809P	FALSE	chr1	64029000	-	NA
7927106	0.0421813	1401	0.987847	-0.0864692	RNU6-1170P	FALSE	chr10	42605157	+	NA
7894832	0.0422079	1402	0.987847	0.153728	NA	FALSE	NA	NA	NA	NA
8050474	0.0422265	1403	0.987847	0.0450598	RDH14	FALSE	chr2	18560680	-	NA
7895807	0.0422446	1404	0.987847	-0.133223	NA	FALSE	NA	NA	NA	NA
7969366	0.0422645	1405	0.987847	-0.0710523	RNY3P10	FALSE	chr13	69802939	+	NA
7930148	0.0422816	1406	0.987847	0.0654353	SFXN2	FALSE	chr10	102714539	+	NA
8165430	0.0422896	1407	0.987847	0.0435678	SAPCD2	FALSE	chr9	137070588	-	NA
8088954	0.0422941	1408	0.987847	-0.133193	NA	FALSE	NA	NA	NA	NA
7894950	0.0423002	1409	0.987847	-0.0900923	NA	FALSE	NA	NA	NA	NA
8053753	0.0423243	1410	0.987847	-0.0542966	LOC442028	FALSE	NA	NA	NA	NA
7961363	0.04234	1411	0.987847	0.0752937	RNU6-1295P	FALSE	NA	NA	NA	NA
7971563	0.0423512	1412	0.987847	0.0409147	PCNPP5	FALSE	NA	NA	NA	NA
7895525	0.0424361	1413	0.987847	-0.0379201	NA	FALSE	NA	NA	NA	NA
7927803	0.0424836	1414	0.987847	-0.0464767	LRRTM3	FALSE	chr10	66926005	+	NA
8133690	0.0425063	1415	0.987847	-0.0316433	MDH2	FALSE	chr7	76048160	+	NA
7955331	0.0425279	1416	0.987847	-0.0242979	SMARCD1	FALSE	chr12	50084971	+	NA
7951325	0.0425739	1417	0.987847	0.0487203	DCUN1D5	FALSE	chr11	103092215	-	NA
7896630	0.0426041	1418	0.987847	-0.155235	NA	FALSE	NA	NA	NA	NA
8104738	0.042606	1419	0.987847	-0.0430395	SUB1	FALSE	chr5	32585498	+	NA
8174594	0.0426409	1420	0.987847	-0.0786831	NA	FALSE	NA	NA	NA	NA
8064894	0.0427751	1421	0.987847	-0.0502548	LRRN4	FALSE	chr20	6054049	-	NA
8109830	0.04281	1422	0.987847	0.0751167	SPDL1	FALSE	chr5	169583633	+	NA
8102789	0.0428256	1423	0.987847	-0.0416432	TERF1P3	FALSE	NA	NA	NA	NA
7896929	0.0428324	1424	0.987847	0.0350397	VWA1	FALSE	chr1	1435670	+	NA
8065252	0.0428562	1425	0.987847	-0.0624944	LOC100287166	FALSE	NA	NA	NA	NA
8024740	0.0429357	1426	0.987847	0.0292778	PIAS4	FALSE	chr19	4007645	+	NA
8067585	0.0429562	1427	0.987847	0.0475587	BHLHE23	FALSE	chr20	63007035	-	NA
8120579	0.0430751	1428	0.987847	0.0558253	C6orf57	FALSE	chr6	70566916	+	NA
7896435	0.0431201	1429	0.987847	0.153004	NA	FALSE	NA	NA	NA	NA
8089954	0.0431771	1430	0.987847	0.064228	IQCB1	FALSE	chr3	121835079	-	rs1920296; rs2255214; rs9282641
8130470	0.0431857	1431	0.987847	0.0448473	NA	FALSE	NA	NA	NA	NA
8022104	0.0431887	1432	0.987847	-0.0981416	RNU6-831P	FALSE	chr18	3894805	-	NA
8058348	0.0431961	1433	0.987847	-0.0644197	NA	FALSE	NA	NA	NA	NA
8090091	0.0432328	1434	0.987847	-0.0391433	PTPLB	FALSE	NA	NA	NA	NA
7893452	0.043246	1435	0.987847	0.229489	NA	FALSE	NA	NA	NA	NA
8175662	0.0432726	1436	0.987847	-0.0429049	RNU6-383P	FALSE	NA	NA	NA	NA
8026390	0.0432828	1437	0.987847	0.0392515	CCDC105	FALSE	chr19	15010743	+	NA
8123342	0.0432848	1438	0.987847	0.0392511	FGFR1OP	FALSE	chr6	166999316	+	NA
8123129	0.0432951	1439	0.987847	0.0407256	WTAP	FALSE	chr6	159727499	+	NA
7957819	0.0433155	1440	0.987847	-0.0611211	SLC17A8	FALSE	chr12	100357367	+	NA
8098165	0.043331	1441	0.987847	-0.0468482	NACA3P	FALSE	NA	NA	NA	NA
8105144	0.0433838	1442	0.987847	-0.0468367	NA	FALSE	NA	NA	NA	NA
7894917	0.0433854	1443	0.987847	-0.0696829	NA	FALSE	NA	NA	NA	NA
8081710	0.0434016	1444	0.987847	-0.0428791	SIDT1	FALSE	chr3	113532295	+	NA
7960832	0.0434058	1445	0.987847	-0.0610955	CLEC4C	FALSE	chr12	7749473	-	NA
8028286	0.043427	1446	0.987847	-0.033918	SIPA1L3	FALSE	chr19	37907227	+	NA
7916219	0.0437183	1447	0.987847	0.0556496	COA7	FALSE	chr1	52698366	-	NA
8100870	0.0437584	1448	0.987847	-0.0609963	ADAMTS3	FALSE	chr4	72568799	-	NA
8033780	0.0437716	1449	0.987847	0.052656	ZNF426	FALSE	chr19	9538627	-	NA
7950420	0.0438637	1450	0.987847	0.0531658	LIPT2	FALSE	chr11	74493733	-	NA
8086075	0.0438822	1451	0.987847	-0.0609616	RNA5SP128	FALSE	chr3	33492098	-	NA
8074059	0.0438825	1452	0.987847	-0.0796486	NA	FALSE	NA	NA	NA	NA
8141380	0.0439957	1453	0.987847	0.0405874	ZNF3	FALSE	chr7	100081727; 100081764; 100079167; 100081740; 100081762; 100081730; 100081739; 100082548; 100081738; 100077587; 100081703; 100081705; 100081709; 100081711; 100081737	-	NA
7908553	0.0440202	1454	0.987847	-0.019383	PTPRC	FALSE	chr1	198639039	+	NA
7896515	0.0440736	1455	0.987847	-0.148409	NA	FALSE	NA	NA	NA	NA
8132986	0.0440796	1456	0.987847	-0.0609065	NA	FALSE	NA	NA	NA	NA
8108066	0.04412	1457	0.987847	-0.0413924	UBE2B	FALSE	chr5	134371178	+	rs756699
7901895	0.0441358	1458	0.987847	0.0489589	ATG4C	FALSE	chr1	62784134	+	NA
8158523	0.0441646	1459	0.987847	-0.0336429	PPP2R4	FALSE	chr9	129111687	+	NA
7896491	0.0442196	1460	0.987847	0.0446228	NA	FALSE	NA	NA	NA	NA
8036420	0.0442473	1461	0.987847	0.0555067	ZFP30	FALSE	chr19	37655412	-	NA
8059708	0.0442501	1462	0.987847	-0.0641086	SNORA75	FALSE	chr2	231455936	-	NA
7929596	0.0443197	1463	0.987847	-0.0375872	LCOR	FALSE	chr10	96832281	+	NA
8001693	0.0443343	1464	0.987847	-0.0193546	CNOT1	FALSE	chr16	58629834	-	NA
8174029	0.0444234	1465	0.987847	-0.0525453	TAF7L	FALSE	NA	NA	NA	NA
7969488	0.0444437	1466	0.987847	0.09899	CLN5	FALSE	chr13	76990659	+	NA
8065372	0.0444597	1467	0.987847	-0.0413276	NAPB	FALSE	chr20	23421519	-	NA
8039092	0.0445093	1468	0.987847	0.0684137	RNU6-803P	FALSE	chr19	53719165	-	NA
8015635	0.0445217	1469	0.987847	0.0488679	PTRF	FALSE	chr17	42423517	-	rs2293152; rs4796791; rs744166; rs9891119
8103722	0.0445329	1470	0.987847	-0.108131	HSP90AA6P	FALSE	NA	NA	NA	NA
7989487	0.0445979	1471	0.987847	0.0683843	NA	FALSE	NA	NA	NA	NA
8156569	0.0446067	1472	0.987847	-0.0412997	MIR23B	FALSE	chr9	95085207	+	NA
8177116	0.0446249	1473	0.987847	-0.06929	RNA5SP518	FALSE	NA	NA	NA	NA
7937878	0.0446374	1474	0.987847	-0.0498234	TRPC2	FALSE	NA	NA	NA	NA
7936706	0.0446443	1475	0.987847	0.0347344	MCMBP	FALSE	chr10	119858237; 119872754; 119872849; 119873621; 119892556	-	NA
7983867	0.0446548	1476	0.987847	-0.060747	CGNL1	FALSE	chr15	57375966; 57376504; 57377145	+	NA
8154793	0.0447167	1477	0.987847	0.0347224	NFX1	FALSE	chr9	33290511	+	NA
8078772	0.0447234	1478	0.987847	-0.0498038	SLC22A14	FALSE	chr3	38305935	+	NA
7974916	0.0447253	1479	0.987847	-0.0607275	RNU6-1162P	FALSE	chr14	63630677	+	NA
7947526	0.0447374	1480	0.987847	-0.0524701	KRT18P14	FALSE	NA	NA	NA	NA
8039680	0.0447714	1481	0.987847	0.0646394	ZNF671	FALSE	chr19	57727624	-	NA
7979414	0.0447824	1482	0.987847	-0.0899373	NA	FALSE	NA	NA	NA	NA
8009796	0.0448517	1483	0.987847	0.0268989	KIAA0195	FALSE	chr17	75456463	+	NA
8176429	0.0448528	1484	0.987847	-0.0502535	TTTY1	FALSE	NA	NA	NA	NA
8177108	0.0448528	1485	0.987847	-0.0502535	TTTY1	FALSE	NA	NA	NA	NA
8048505	0.0448829	1486	0.987847	0.0389502	STK16	FALSE	chr2	219245454	+	NA
8001750	0.0449337	1487	0.987847	0.0389407	SLC38A7	FALSE	chr16	58685104	-	NA
8056730	0.0449492	1488	0.987847	-0.0536414	LINC01124	FALSE	chr2	170714567	-	NA
8130211	0.0449588	1489	0.987847	-0.0412332	SYNE1	FALSE	chr6	152636851	-	NA
8045962	0.0449753	1490	0.987847	0.0481551	TBR1	FALSE	chr2	161416093	+	NA
8021884	0.044992	1491	0.987847	0.0348462	CTDP1	FALSE	chr18	79681429	+	NA
7921677	0.0450088	1492	0.987847	-0.0459357	CD244	FALSE	chr1	160862760	-	rs35967351
8095221	0.0450321	1493	0.987847	0.0523368	PAICS	FALSE	chr4	56436151	+	NA
7896728	0.0450358	1494	0.987847	0.0487477	NA	FALSE	NA	NA	NA	NA
7895352	0.0450538	1495	0.987847	0.258895	NA	FALSE	NA	NA	NA	NA
7954465	0.0450574	1496	0.987847	-0.0606363	NA	FALSE	NA	NA	NA	NA
7946128	0.0450909	1497	0.987847	0.044437	FAM160A2	FALSE	chr11	6234616	-	NA
7950032	0.0451015	1498	0.987847	0.0403732	FGF4	FALSE	chr11	69775403	-	NA
8114152	0.0451349	1499	0.987847	-0.0632343	SKP1	FALSE	chr5	134176964	-	rs756699
8024896	0.0452198	1500	0.987847	-0.0449277	MIR7-3	FALSE	chr19	4770669	+	NA
8099756	0.0452745	1501	0.987847	-0.060577	NA	FALSE	NA	NA	NA	NA
8163328	0.0453746	1502	0.987847	0.0644523	PTGR1	FALSE	chr9	111599855	-	NA
7894415	0.0454852	1503	0.987847	0.22683	NA	FALSE	NA	NA	NA	NA
8123446	0.0455267	1504	0.987847	-0.0424622	SMOC2	FALSE	chr6	168441150	+	NA
7999233	0.0455405	1505	0.987847	0.038829	GLYR1	FALSE	chr16	4847342	-	NA
8117685	0.0456189	1506	0.987847	0.0551429	ZKSCAN3	FALSE	chr6	28349949	+	NA
7952382	0.0456735	1507	0.987847	-0.0689647	OR6T1	FALSE	chr11	123943873	-	NA
7940299	0.045676	1508	0.987847	-0.0604679	MS4A12	FALSE	chr11	60492777	+	NA
7900438	0.0456929	1509	0.987847	0.0657467	ZFP69B	FALSE	chr1	40450664	+	NA
8004255	0.0456957	1510	0.987847	0.0428565	BCL6B	FALSE	chr17	7023019	+	NA
8030879	0.0457024	1511	0.987847	-0.085102	NA	FALSE	NA	NA	NA	NA
7894571	0.0457073	1512	0.987847	0.121448	NA	FALSE	NA	NA	NA	NA
8118124	0.04572	1513	0.987847	-0.0386975	MCCD1	FALSE	chr6	31528716	+	NA
7894780	0.0457387	1514	0.987847	-0.154244	NA	FALSE	NA	NA	NA	NA
8142061	0.0457721	1515	0.987847	0.0857486	PUS7	FALSE	chr7	105522258	-	NA
7973020	0.0457832	1516	0.987847	-0.0495653	OR4Q2	FALSE	chr14	20002162	+	NA
8119829	0.0458112	1517	0.987847	0.0387795	TJAP1	FALSE	chr6	43477522	+	NA
8115840	0.0458143	1518	0.987847	0.0345428	NKX2-5	FALSE	chr5	173235264	-	NA
8136979	0.0458314	1519	0.987847	-0.0373284	CTAGE9	FALSE	chr6	131711017	-	NA
8149885	0.0458682	1520	0.987847	-0.0457573	ADRA1A	FALSE	chr8	26865405	-	NA
8000924	0.0458897	1521	0.987847	0.0387652	ZNF689	FALSE	chr16	30610379	-	rs7204270
8144317	0.0458966	1522	0.987847	0.0442679	KBTBD11	FALSE	chr8	1973877	+	NA
8046502	0.0458992	1523	0.987847	0.0485485	SCRN3	FALSE	chr2	174395744	+	NA
7896472	0.045939	1524	0.987847	-0.0457428	NA	FALSE	NA	NA	NA	NA
8154491	0.0459561	1525	0.987847	-0.0567198	ADAMTSL1	FALSE	chr9	18474099	+	NA
8121334	0.0459873	1526	0.987847	0.0387475	NR2E1	FALSE	chr6	108168022	+	NA
7952451	0.046024	1527	0.987847	-0.0635986	LOC100130428	FALSE	NA	NA	NA	NA
8157580	0.0460275	1528	0.987847	0.0972044	RN7SL181P	FALSE	chr9	121203158	+	NA
8127549	0.0460537	1529	0.987847	0.0427844	SLC17A5	FALSE	chr6	73654155	-	NA
8131385	0.0460793	1530	0.987847	-0.064109	RNU6-218P	FALSE	chr7	6057499	+	NA
8098762	0.0460882	1531	0.987847	-0.0333481	ATP5I	TRUE	chr4	674338	-	NA
7892561	0.0461504	1532	0.987847	-0.0423429	NA	FALSE	NA	NA	NA	NA
8023906	0.046252	1533	0.987847	-0.0423236	NA	FALSE	NA	NA	NA	NA
7894624	0.0462554	1534	0.987847	-0.0566442	NA	FALSE	NA	NA	NA	NA
7940409	0.0462835	1535	0.987847	-0.110583	CD5	FALSE	chr11	61102394	+	rs34383631; rs650258
7893935	0.046345	1536	0.987847	-0.130848	NA	FALSE	NA	NA	NA	NA
8155946	0.046371	1537	0.987847	-0.0409706	VPS13A	FALSE	chr9	77177444	+	NA
7923798	0.0464212	1538	0.987847	0.0344451	NUCKS1	FALSE	chr1	205750276	-	NA
7920737	0.0464296	1539	0.987847	0.037944	CLK2	FALSE	chr1	155273287; 155273516; 155273329; 155273482; 155269363; 155278491; 155270841	-	NA
8060805	0.0464493	1540	0.987847	-0.0565954	CHGB	FALSE	chr20	5911429	+	NA
7973727	0.0464643	1541	0.987847	-0.0565916	NYNRIN	FALSE	chr14	24398785	+	NA
8030848	0.046481	1542	0.987847	0.042699	SPACA6P	FALSE	chr19	51693343	+	NA
8156393	0.0465026	1543	0.987847	0.0519739	SUSD3	FALSE	chr9	93069099	+	NA
8132531	0.0465437	1544	0.987847	-0.0532588	SPDYE1	FALSE	chr7	44000888	+	NA
7944667	0.0465761	1545	0.987847	-0.0372035	SORL1	FALSE	chr11	121452202	+	NA
7981266	0.0465815	1546	0.987847	0.0477912	CCDC85C	FALSE	chr14	99604026	-	NA
7941702	0.0465975	1547	0.987847	-0.068683	RBM14	FALSE	chr11	66616625	+	NA
8065032	0.0465986	1548	0.987847	0.0548887	ESF1	FALSE	chr20	13782597; 13784886	-	NA
7976571	0.0466079	1549	0.987847	0.0562379	GSKIP	FALSE	chr14	96363556	+	NA
8032730	0.0466281	1550	0.987847	0.0195259	EEF2	TRUE	chr19	3985469	-	NA
7895316	0.0467032	1551	0.987847	-0.0745679	NA	FALSE	NA	NA	NA	NA
7954063	0.0467264	1552	0.987847	0.0343963	RPL13AP20	FALSE	NA	NA	NA	NA
8051241	0.0467296	1553	0.987847	-0.0415597	ALK	FALSE	chr2	29921566	-	NA
7911351	0.0467508	1554	0.987847	0.0467034	LINC00115	FALSE	chr1	827522	-	NA
8064514	0.0467659	1555	0.987847	0.0640288	ZNF343	FALSE	chr20	2493030; 2508901; 2508915; 2509132; 2509132; 2524522; 2524522; 2524702	-	NA
7948211	0.0467908	1556	0.987847	0.0640213	SSRP1	FALSE	chr11	57335851	-	NA
7896704	0.0468053	1557	0.987847	-0.0686204	NA	FALSE	NA	NA	NA	NA
7893320	0.0468101	1558	0.987847	-0.113312	NA	FALSE	NA	NA	NA	NA
7972217	0.0468244	1559	0.987847	0.138793	SPRY2	FALSE	chr13	80339659	-	NA
7908610	0.046829	1560	0.987847	-0.0686132	RNU6-570P	FALSE	chr1	200054060	+	NA
8169002	0.0469096	1561	0.987847	-0.0785829	NA	FALSE	NA	NA	NA	NA
8051670	0.0469386	1562	0.987847	-0.0371434	SOS1	FALSE	chr2	39120463	-	NA
8052250	0.0469676	1563	0.987847	0.043314	MTIF2	FALSE	chr2	55249534; 55263868; 55267604; 55267787; 55269038; 55269138; 55269179; 55269193; 55269217; 55269243; 55269248; 55269347	-	NA
8076272	0.047012	1564	0.987847	0.0319845	ST13	FALSE	chr22	40857022; 40856616; 40856565; 40835905; 40856616; 40844890; 40854598; 40835949	-	NA
8128865	0.0470352	1565	0.987847	0.0924271	RN7SL617P	FALSE	chr6	110440303	-	NA
7895736	0.0470535	1566	0.987847	0.0476863	NA	FALSE	NA	NA	NA	NA
8132209	0.0470681	1567	0.987847	0.0476831	ZNRF2P1	FALSE	NA	NA	NA	NA
7926638	0.0471446	1568	0.987847	-0.0600756	ARMC3	FALSE	chr10	22928036	+	NA
7903334	0.0471713	1569	0.987847	-0.102863	CDC14A	FALSE	chr1	100352599	+	rs7552544
7959108	0.0472199	1570	0.987847	-0.0592613	CCDC60	FALSE	chr12	119334711	+	NA
8053713	0.0472361	1571	0.987847	-0.0492457	LOC102724453	FALSE	NA	NA	NA	NA
8007429	0.0472429	1572	0.987847	-0.0492443	G6PC	FALSE	chr17	42900797	+	NA
8146579	0.0472799	1573	0.987847	-0.0563882	CHD7	FALSE	chr8	60678777	+	NA
8078173	0.0473395	1574	0.987847	0.0834757	OXNAD1	FALSE	chr3	16265198	+	NA
7972044	0.0473412	1575	0.987847	-0.0715401	COMMD6	FALSE	chr13	75537805; 75538802; 75530504; 75537618; 75537826; 75537841; 75537841; 75538802; 75549428; 75537844; 75537841; 75549439; 75537805	-	NA
7894563	0.0473503	1576	0.987847	0.0922895	NA	FALSE	NA	NA	NA	NA
7894891	0.047386	1577	0.987847	0.106612	NA	FALSE	NA	NA	NA	NA
8017148	0.0473918	1578	0.987847	-0.0784184	RNU6-450P	FALSE	chr17	59847544	-	rs180515; rs8070345
8142169	0.0474415	1579	0.987847	-0.130242	NA	FALSE	NA	NA	NA	NA
8131292	0.0474526	1580	0.987847	0.0425072	RBAK	FALSE	chr7	5045820	+	NA
8004219	0.0474707	1581	0.987847	-0.0844479	NA	FALSE	NA	NA	NA	NA
8145281	0.0474777	1582	0.987847	0.059703	SLC25A37	FALSE	chr8	23528966	+	NA
8044417	0.0474874	1583	0.987847	0.0638134	TMEM87B	FALSE	chr2	112055222	+	rs17174870
7893308	0.0475089	1584	0.987847	-0.0783787	NA	FALSE	NA	NA	NA	NA
7952549	0.0475206	1585	0.987847	0.0439346	RPUSD4	FALSE	chr11	126211646	-	NA
7927936	0.0475434	1586	0.987847	0.0399154	DDX21	FALSE	chr10	68956439	+	NA
7896535	0.0476053	1587	0.987847	0.224416	NA	FALSE	NA	NA	NA	NA
7984408	0.0476055	1588	0.987847	-0.0420698	MAP2K5	FALSE	chr15	67548997	+	NA
7927732	0.047627	1589	0.987847	0.0819335	ARID5B	FALSE	chr10	62049210	+	NA
8146456	0.0476485	1590	0.987847	-0.053	RNU105C	FALSE	chr8	54330686	+	NA
7894104	0.0476601	1591	0.987847	0.0475529	NA	FALSE	NA	NA	NA	NA
8039068	0.0476809	1592	0.987847	-0.0367469	NDUFV2	TRUE	chr18	9102629	+	NA
8098263	0.0476961	1593	0.987847	-0.0879538	PALLD	FALSE	chr4	168497103	+	NA
8163105	0.0477018	1594	0.987847	-0.065474	NA	FALSE	NA	NA	NA	NA
8005707	0.0477204	1595	0.987847	-0.0370149	MAP2K3	FALSE	chr17	21288035	+	NA
7892517	0.0477327	1596	0.987847	0.123468	NA	FALSE	NA	NA	NA	NA
8045525	0.047751	1597	0.987847	-0.0562721	NA	FALSE	NA	NA	NA	NA
8180276	0.0477556	1598	0.987847	0.042448	NA	FALSE	NA	NA	NA	NA
7896226	0.0477797	1599	0.987847	0.119344	NA	FALSE	NA	NA	NA	NA
7965226	0.0478343	1600	0.987847	-0.0517503	RASSF9	FALSE	chr12	85836570	-	NA
7899244	0.0478619	1601	0.987847	0.0438658	PIGV	FALSE	chr1	26788194	+	NA
8050619	0.0480283	1602	0.987847	-0.0490749	APOB	FALSE	chr2	21044073	-	NA
8071020	0.0480424	1603	0.987847	0.0398243	C21orf58	FALSE	chr21	46319137	-	NA
7932495	0.0480803	1604	0.987847	0.0494895	CASC10	FALSE	chr10	21497262	-	NA
8093976	0.0480807	1605	0.987847	0.0521178	TBC1D14	FALSE	chr4	6909443	+	NA
8021666	0.0480895	1606	0.987847	-0.121228	NA	FALSE	NA	NA	NA	NA
7999468	0.0482922	1607	0.987847	-0.0257915	LITAF	FALSE	chr16	11586950	-	rs12927355; rs4780346; rs6498184; rs7191700
7895117	0.0483242	1608	0.987847	0.123123	NA	FALSE	NA	NA	NA	NA
8016033	0.0483299	1609	0.987847	0.0480042	FAM171A2	FALSE	chr17	44363875	-	NA
7894808	0.0483402	1610	0.987847	-0.0369143	NA	FALSE	NA	NA	NA	NA
8006423	0.0483887	1611	0.987847	-0.0452498	SPACA3	FALSE	chr17	32991868	+	NA
7922707	0.0484044	1612	0.987847	0.0515187	RNASEL	FALSE	chr1	182589256; 182589256	-	NA
8073309	0.0484366	1613	0.987847	0.049409	NA	FALSE	NA	NA	NA	NA
8180385	0.0484366	1614	0.987847	0.049409	NA	FALSE	NA	NA	NA	NA
8032478	0.0484986	1615	0.987847	0.0479673	LINGO3	FALSE	chr19	2292024	-	NA
8145914	0.0485187	1616	0.987847	0.0437345	BAG4	FALSE	chr8	38176587	+	NA
8095854	0.0485464	1617	0.987847	-0.0329859	2011-09-01	FALSE	chr4	76949702	+	NA
7943437	0.0485927	1618	0.987847	-0.049426	NA	FALSE	NA	NA	NA	NA
7971513	0.048642	1619	0.987847	0.062582	ESD	FALSE	chr13	46797232	-	NA
7895459	0.0486763	1620	0.987847	-0.147931	NA	FALSE	NA	NA	NA	NA
8072744	0.0487101	1621	0.987847	0.0969912	NCF4	FALSE	chr22	36860987	+	NA
8151631	0.0487298	1622	0.987847	0.0462806	REXO1L2P	FALSE	NA	NA	NA	NA
8157231	0.0487355	1623	0.987847	-0.0839923	RNA5SP295	FALSE	chr9	112252257	+	NA
7896878	0.0488197	1624	0.987847	0.038246	B3GALT6	FALSE	chr1	1232264	+	NA
8073096	0.0489029	1625	0.987847	-0.0779118	APOBEC3H	FALSE	chr22	39097223	+	NA
8016523	0.0489343	1626	0.987847	-0.0451429	GIP	FALSE	chr17	48968596	-	NA
7963845	0.0489469	1627	0.987847	-0.0488797	DCD	FALSE	chr12	54648493	-	NA
8084739	0.0489529	1628	0.987847	-0.0608167	FLJ42393	FALSE	chr3	188178542	+	NA
7895302	0.0489838	1629	0.987847	-0.120777	NA	FALSE	NA	NA	NA	NA
8016371	0.0489912	1630	0.987847	0.0429149	SCRN2	FALSE	chr17	47841289	-	rs4239162; rs4794058
8038695	0.0490041	1631	0.987847	0.0436385	KLK7	FALSE	chr19	50984038	-	NA
8097445	0.0490507	1632	0.987847	-0.0595812	RNU6-224P	FALSE	chr4	131273241	+	NA
7935146	0.0490717	1633	0.987847	0.0518829	NOC3L	FALSE	chr10	94362939	-	NA
7927981	0.0491286	1634	0.987847	0.0542528	SUPV3L1	FALSE	chr10	69180231	+	NA
7900087	0.0491388	1635	0.987847	0.0341861	ADPRHL2	FALSE	chr1	36088874	+	NA
7909946	0.0491772	1636	0.987847	-0.0580077	FAM177B	FALSE	chr1	222737306	+	NA
7965787	0.0492034	1637	0.987847	0.051852	RNU6-768P	FALSE	chr12	101199377	-	NA
7895101	0.0492345	1638	0.987847	0.0492305	NA	FALSE	NA	NA	NA	NA
8027117	0.0492385	1639	0.987847	0.038174	ARMC6	FALSE	chr19	19033577	+	NA
8098721	0.04924	1640	0.987847	0.0513236	RNA5SP174	FALSE	chr4	190015137	+	NA
8049544	0.0492867	1641	0.987847	-0.0678889	LRRFIP1	FALSE	chr2	237627575	+	NA
8063380	0.049319	1642	0.987847	0.0632788	RNU6-147P	FALSE	chr20	49972105	+	rs17785991
7906993	0.0493676	1643	0.987847	-0.0595006	NA	FALSE	NA	NA	NA	NA
7898750	0.0493933	1644	0.987847	0.0381475	ZBTB40	FALSE	chr1	22451850	+	NA
8044225	0.0494277	1645	0.987847	-0.0594853	SULT1C4	FALSE	chr2	108378011	+	NA
8142059	0.0495377	1646	0.987847	0.0541526	NA	FALSE	NA	NA	NA	NA
7920944	0.0495694	1647	0.987847	0.0323761	SMG5	FALSE	chr1	156282825	-	NA
8109826	0.0495975	1648	0.987847	-0.0487433	NA	FALSE	NA	NA	NA	NA
8163491	0.0496006	1649	0.987847	-0.0380407	WDR31	FALSE	chr9	113340282	-	NA
8177554	0.0496021	1650	0.987847	-0.0455543	PMCHL1	FALSE	NA	NA	NA	NA
8058462	0.0496661	1651	0.987847	-0.0558095	MDH1B	FALSE	chr2	206765286	-	NA
8157450	0.0496785	1652	0.987847	-0.101781	ORM2	FALSE	chr9	114329868	+	NA
8113639	0.0496803	1653	0.987847	-0.048726	RNU2-49P	FALSE	chr5	115774502	-	NA
8006638	0.0497212	1654	0.987847	0.0380916	GGNBP2	FALSE	chr17	36544887	+	NA
7934916	0.0497533	1655	0.987847	0.105439	CH25H	FALSE	chr10	89207314	-	NA
8056972	0.0497547	1656	0.987847	-0.0594026	NA	FALSE	NA	NA	NA	NA
8139727	0.0497786	1657	0.987847	-0.0491746	2014-09-01	FALSE	chr7	55862789	-	NA
8117520	0.0497908	1658	0.987847	-0.0440318	NA	FALSE	NA	NA	NA	NA
8035863	0.0498141	1659	0.987847	0.0517096	RNA5-8SP4	FALSE	chr19	24004507	-	NA
7959220	0.0498213	1660	0.987847	0.0380746	ACADS	FALSE	chr12	120725734	+	NA
7979437	0.0498219	1661	0.987847	0.0794194	L3HYPDH	FALSE	chr14	59484430	-	NA
7939963	0.049868	1662	0.987847	-0.0593741	OR5J1P	FALSE	NA	NA	NA	NA
8068235	0.0498699	1663	0.987847	0.0380664	OLIG1	FALSE	chr21	33070143	+	NA
8075657	0.0498928	1664	0.987847	0.0631148	NA	FALSE	NA	NA	NA	NA
7893731	0.0499303	1665	0.987847	0.0511645	NA	FALSE	NA	NA	NA	NA
7895690	0.0499691	1666	0.987847	0.0338944	NA	FALSE	NA	NA	NA	NA
8140942	0.0499948	1667	0.987847	-0.0366508	FAM133B	FALSE	chr7	92590393	-	NA
7949754	0.0500142	1668	0.987847	-0.055727	CLCF1	FALSE	chr11	67374177	-	NA
8104068	0.0500521	1669	0.987847	-0.0676694	NA	FALSE	NA	NA	NA	NA
7932086	0.050068	1670	0.987847	0.0590015	RNA5SP300	FALSE	chr10	12924785	-	NA
8039791	0.0500703	1671	0.987847	0.0420065	ZBTB45	FALSE	chr19	58519554	-	NA
8156373	0.0501212	1672	0.987847	0.0338715	FGD3	FALSE	chr9	92947450	+	NA
7918294	0.0501407	1673	0.987847	-0.0486305	C1orf194	FALSE	chr1	109113857	-	NA
8152922	0.0501616	1674	0.987847	-0.0416064	NA	FALSE	NA	NA	NA	NA
8103922	0.0501741	1675	0.987847	0.062149	CASP3	FALSE	chr4	184649475	-	NA
8172660	0.0501855	1676	0.987847	-0.0676314	AKAP4	FALSE	NA	NA	NA	NA
7896493	0.0501957	1677	0.987847	-0.035959	NA	FALSE	NA	NA	NA	NA
7938925	0.0501961	1678	0.987847	-0.0486191	NELL1	FALSE	chr11	20669570	+	NA
7982495	0.0502323	1679	0.987847	-0.0592827	NA	FALSE	NA	NA	NA	NA
8147303	0.0502639	1680	0.987847	0.0516057	RN7SKP231	FALSE	chr8	91594964	+	NA
7914805	0.0502765	1681	0.987847	0.0671859	RN7SL503P	FALSE	chr1	35292498	-	NA
8012696	0.0503352	1682	0.987847	-0.0485904	MYH4	FALSE	chr17	10469559	-	NA
8071411	0.0503428	1683	0.987847	0.0724858	POM121L4P	FALSE	NA	NA	NA	NA
8029988	0.0503441	1684	0.987847	-0.0523889	ELSPBP1	FALSE	chr19	47994650	+	NA
8112894	0.0503496	1685	0.987847	-0.105482	RNU6-211P	FALSE	chr5	80365832	-	NA
8139131	0.0504003	1686	0.987847	-0.0448603	AMPH	FALSE	chr7	38631567	-	NA
7979820	0.0504565	1687	0.987847	0.0419345	NA	FALSE	NA	NA	NA	NA
8152865	0.0504657	1688	0.987847	-0.0774012	NA	FALSE	NA	NA	NA	NA
7995580	0.0504861	1689	0.987847	0.053923	NA	FALSE	NA	NA	NA	NA
8023816	0.0504944	1690	0.987847	-0.0628985	GTSCR1	FALSE	chr18	70650744	-	NA
7970975	0.0505024	1691	0.987847	-0.048556	SOHLH2	FALSE	chr13	36214588	-	NA
8151619	0.0505344	1692	0.987847	0.04192	REXO1L2P	FALSE	NA	NA	NA	NA
7895776	0.0505533	1693	0.987847	-0.105394	NA	FALSE	NA	NA	NA	NA
7987892	0.0505655	1694	0.987847	-0.0305162	ZNF106	FALSE	chr15	42457513	-	NA
8055135	0.0506203	1695	0.987847	-0.105365	NA	FALSE	NA	NA	NA	NA
7961604	0.0506264	1696	0.987847	-0.0415243	PLCZ1	FALSE	chr12	18738057	-	NA
7927527	0.050629	1697	0.987847	-0.0675058	NA	FALSE	NA	NA	NA	NA
7933593	0.050629	1698	0.987847	-0.0675058	NA	FALSE	NA	NA	NA	NA
8066668	0.0506335	1699	0.987847	0.0339598	NCOA5	FALSE	chr20	46089952	-	rs2425752; rs4810485; rs6074022
8153449	0.0506631	1700	0.987847	0.0272813	EEF1D	TRUE	chr8	143597675	-	NA
8148474	0.0506643	1701	0.987847	-0.0523182	RNA5SP278	FALSE	chr8	140940561	+	NA
8065198	0.0507277	1702	0.987847	-0.048977	RNU2-56P	FALSE	chr20	18265879	-	NA
7998457	0.0507853	1703	0.987847	0.0379123	UNKL	FALSE	chr16	1414720	-	rs2744148
7977033	0.0508916	1704	0.987847	0.0371859	AMN	FALSE	chr14	102922655	+	rs12148050
8157516	0.050896	1705	0.987847	0.0628319	TRIM32	FALSE	chr9	116687342; 116687301; 116687329	+	NA
8054486	0.050905	1706	0.987847	-0.0438238	NPHP1	FALSE	chr2	110204992	-	NA
7902911	0.0509236	1707	0.987847	-0.0484698	NA	FALSE	NA	NA	NA	NA
8059902	0.0509394	1708	0.987847	-0.0627814	LOC93463	FALSE	NA	NA	NA	NA
8015060	0.0509583	1709	0.987847	-0.041466	KRT24	FALSE	chr17	40703750	-	NA
8092834	0.0509735	1710	0.987847	-0.0522502	RN7SL447P	FALSE	chr3	193740715	-	NA
8148302	0.0509815	1711	0.987847	-0.0746608	RN7SL329P	FALSE	chr8	125270603	+	NA
8048317	0.0510452	1712	0.987847	-0.0590806	MIR26B	FALSE	chr2	218402636	+	NA
8078999	0.0510836	1713	0.987847	0.0468255	ZNF620	FALSE	chr3	40506038	+	NA
7894346	0.0510935	1714	0.987847	-0.0590687	NA	FALSE	NA	NA	NA	NA
7926981	0.0510965	1715	0.987847	-0.0510327	RNU6-193P	FALSE	chr10	34942968	+	NA
8127396	0.0511081	1716	0.987847	-0.14413	EYS	FALSE	chr6	65707225	-	NA
8097124	0.0511189	1717	0.987847	-0.0746183	RNU6-550P	FALSE	chr4	120810468	+	NA
7911301	0.0511592	1718	0.987847	0.0587153	PGBD2	FALSE	chr1	248906242	+	NA
7972223	0.0511641	1719	0.987847	0.0432206	RNU6-61P	FALSE	chr13	80369534	-	NA
7894062	0.0512009	1720	0.987847	-0.0447089	NA	FALSE	NA	NA	NA	NA
8013384	0.051298	1721	0.987847	0.0378271	ALDH3A1	FALSE	chr17	19748341; 19748341; 19748364; 19748393; 19748433; 19745612; 19745459; 19745680; 19741356; 19743500; 19745133; 19748298; 19745146; 19748943; 19745412; 19748293; 19745612	-	NA
7994565	0.0513345	1722	0.987847	-0.0364428	RRN3	FALSE	chr16	15094317	-	NA
8115344	0.0513604	1723	0.987847	-0.0673005	RN7SKP232	FALSE	chr5	151704578	-	NA
7925730	0.0513668	1724	0.987847	-0.0626697	OR14A2	FALSE	chr1	247724043	-	NA
7895645	0.0514893	1725	0.987847	0.168104	NA	FALSE	NA	NA	NA	NA
8059576	0.0515707	1726	0.987847	0.0431437	NA	FALSE	NA	NA	NA	NA
8056184	0.0516831	1727	0.987847	-0.0483158	ITGB6	FALSE	chr2	160112110; 160200252; 160200258; 160200301; 160200304; 160200304; 160200313; 160253849; 160271249; 160271880; 160271888	-	NA
7922969	0.0516969	1728	0.987847	-0.0509048	PDC	FALSE	chr1	186461122	-	NA
7896624	0.0517192	1729	0.987847	-0.0589151	NA	FALSE	NA	NA	NA	NA
7996281	0.0517209	1730	0.987847	-0.0400326	BEAN1	FALSE	chr16	66427370	+	NA
8136658	0.0517289	1731	0.987847	-0.0702238	NA	FALSE	NA	NA	NA	NA
8025958	0.051758	1732	0.987847	0.0431084	ZNF440	FALSE	chr19	11814283	+	NA
7974288	0.0517645	1733	0.987847	-0.0451397	ABHD12B	FALSE	chr14	50893739	+	NA
7963359	0.0517713	1734	0.987847	0.0456583	KRT83	FALSE	chr12	52321398	-	NA
7896736	0.0517935	1735	0.987847	-0.0829294	NA	FALSE	NA	NA	NA	NA
8023933	0.0517935	1736	0.987847	-0.0829294	NA	FALSE	NA	NA	NA	NA
8130765	0.0518059	1737	0.987847	0.0377434	FAM103A1	FALSE	chr15	82986206	+	NA
8118682	0.051816	1738	0.987847	-0.0363691	PHF1	TRUE	chr6	33410960	+	NA
8039010	0.0518412	1739	0.987847	0.033617	ZNF813	FALSE	chr19	53467734	+	NA
8086077	0.0518469	1740	0.987847	-0.0400115	CLASP2	FALSE	chr3	33659441	-	NA
8078920	0.0518479	1741	0.987847	-0.0508729	MOBP	FALSE	chr3	39467679	+	NA
8017825	0.0519093	1742	0.987847	0.0903819	NA	FALSE	NA	NA	NA	NA
8146550	0.0519445	1743	0.987847	0.053577	SDCBP	FALSE	chr8	58552923; 58553261; 58570711; 58553260; 58577992; 58565015; 58553254; 58553236; 58553216; 58553215; 58553253; 58561747; 58553168	+	NA
7923372	0.0519635	1744	0.987847	0.0456201	PHLDA3	FALSE	chr1	201469184	-	rs12122721
7996393	0.051967	1745	0.987847	-0.0253869	CBFB	FALSE	chr16	67029146	+	NA
7929168	0.0520235	1746	0.987847	-0.0356822	TNKS2	FALSE	chr10	91798311	+	NA
7952361	0.0520247	1747	0.987847	0.0416469	ZNF202	FALSE	chr11	123741655	-	NA
8141423	0.0520619	1748	0.987847	0.0625091	MIR106B	FALSE	chr7	100094074	-	NA
7927998	0.0521196	1749	0.987847	-0.0508155	HKDC1	FALSE	chr10	69220302	+	NA
7923027	0.0521977	1750	0.987847	0.0465977	GLRX2	FALSE	chr1	193106114	-	NA
7919024	0.0522106	1751	0.987847	-0.0871421	RNA5SP56	FALSE	chr1	118264489	-	NA
8180375	0.0522638	1752	0.987847	-0.0466412	NA	FALSE	NA	NA	NA	NA
8064430	0.0523062	1753	0.987847	-0.0507763	NA	FALSE	NA	NA	NA	NA
8026610	0.0523123	1754	0.987847	0.0335485	SIN3B	FALSE	chr19	16829406	+	rs1870071
8040528	0.0523338	1755	0.987847	-0.0624198	RNU6-370P	FALSE	chr2	24045834	+	NA
8057819	0.0523476	1756	0.987847	-0.107831	RNU6-915P	FALSE	chr2	195670474	-	NA
7925609	0.0524574	1757	0.987847	-0.100633	NA	FALSE	NA	NA	NA	NA
8027239	0.0524981	1758	0.987847	0.058371	NA	FALSE	NA	NA	NA	NA
7894801	0.052582	1759	0.987847	0.0510821	NA	FALSE	NA	NA	NA	NA
7985032	0.0526033	1760	0.987847	0.120725	NA	FALSE	NA	NA	NA	NA
7963479	0.0526154	1761	0.987847	-0.044446	KRT2	FALSE	chr12	52652164	-	NA
8104650	0.0526374	1762	0.987847	-0.0481249	RNU4-43P	FALSE	chr5	26012888	+	NA
8063650	0.0526498	1763	0.987847	0.0376058	NPEPL1	FALSE	chr20	58689130	+	NA
8117128	0.0526498	1764	0.987847	-0.0669445	E2F3	FALSE	chr6	20403678	+	NA
8102713	0.0526566	1765	0.987847	0.0583308	NUDT6	FALSE	chr4	122922606	-	NA
8167815	0.0526831	1766	0.987847	-0.0434995	MAGED2	FALSE	NA	NA	NA	NA
8085852	0.0526985	1767	0.987847	-0.0362355	NGLY1	FALSE	chr3	25783498	-	NA
7991246	0.0527014	1768	0.987847	0.0510557	RLBP1	FALSE	chr15	89221751	-	NA
8095395	0.0527234	1769	0.987847	-0.0766859	UGT2B7	FALSE	chr4	69096474	+	NA
7946069	0.0527429	1770	0.987847	-0.0518675	OR51B2	FALSE	chr11	5324352	-	NA
7928529	0.0527475	1771	0.987847	0.0583077	ZNF503	FALSE	chr10	75401755; 75401906	-	NA
8018264	0.0527988	1772	0.987847	0.0464765	HID1	FALSE	chr17	74972734	-	NA
7931764	0.0528294	1773	0.987847	0.0622999	ADARB2	FALSE	chr10	1737476	-	NA
7894677	0.0528661	1774	0.987847	0.146002	NA	FALSE	NA	NA	NA	NA
7901662	0.0529259	1775	0.987847	0.0428908	TTC4	FALSE	chr1	54715821	+	NA
8161224	0.052956	1776	0.987847	0.046445	ZBTB5	FALSE	chr9	37465399	-	NA
8170390	0.0530084	1777	0.987847	-0.0252765	IDS	FALSE	NA	NA	NA	NA
8146794	0.0530259	1778	0.987847	-0.0411098	PREX2	FALSE	chr8	67952117	+	NA
8070421	0.0530573	1779	0.987847	0.0428665	DSCAM	FALSE	chr21	40847139; 40369270; 40353654	-	NA
7957673	0.0530654	1780	0.987847	-0.048503	C12orf55	FALSE	NA	NA	NA	NA
7893051	0.0530895	1781	0.987847	0.166875	NA	FALSE	NA	NA	NA	NA
8089329	0.053167	1782	0.987847	-0.041086	MYH15	FALSE	chr3	108529322	-	NA
7892615	0.053189	1783	0.987847	-0.12634	NA	FALSE	NA	NA	NA	NA
8092638	0.0531927	1784	0.987847	-0.0940534	RNU6-1105P	FALSE	chr3	186771947	-	NA
7895604	0.053225	1785	0.987847	-0.0505847	NA	FALSE	NA	NA	NA	NA
7893915	0.0533029	1786	0.987847	-0.107421	NA	FALSE	NA	NA	NA	NA
8133165	0.0533398	1787	0.987847	-0.073944	RNU6-96P	FALSE	chr7	66395190	+	NA
7939954	0.0533494	1788	0.987847	-0.0859166	TRIM51	FALSE	chr11	55883296	+	NA
7972665	0.0533579	1789	0.987847	-0.0577451	METTL21C	FALSE	chr13	102694504	-	NA
8118721	0.0533899	1790	0.987847	0.0483385	ZBTB9	FALSE	chr6	33454578	+	NA
7895036	0.0534028	1791	0.987847	0.0621453	NA	FALSE	NA	NA	NA	NA
7914075	0.0535249	1792	0.987847	0.0453135	FCN3	FALSE	chr1	27374824	-	NA
7922295	0.0535578	1793	0.987847	-0.066698	NA	FALSE	NA	NA	NA	NA
7935528	0.053577	1794	0.987847	0.0503536	SFRP5	FALSE	chr10	97771952	-	NA
8126542	0.0535819	1795	0.987847	-0.0479387	ZNF318	FALSE	chr6	43369443	-	NA
8103064	0.0536471	1796	0.987847	-0.0584512	TTC29	FALSE	chr4	146945882	-	NA
7896705	0.0536973	1797	0.987847	0.103588	NA	FALSE	NA	NA	NA	NA
8088546	0.0537459	1798	0.987847	-0.0822774	NA	FALSE	NA	NA	NA	NA
8043423	0.0537539	1799	0.987847	-0.0584259	NA	FALSE	NA	NA	NA	NA
7942783	0.0537593	1800	0.987847	-0.0479041	AAMDC	FALSE	chr11	77821143	+	NA
8028607	0.0537804	1801	0.987847	0.0620442	IFNL2	FALSE	chr19	39268513	+	NA
7892932	0.0537813	1802	0.987847	-0.0620528	NA	FALSE	NA	NA	NA	NA
7912804	0.0538074	1803	0.987847	0.0713875	LOC101927806	FALSE	NA	NA	NA	NA
8125788	0.0538523	1804	0.987847	0.0278656	LEMD2	FALSE	chr6	33787001	-	NA
7896716	0.0538644	1805	0.987847	-0.0447504	NA	FALSE	NA	NA	NA	NA
8014342	0.0538645	1806	0.987847	-0.0516303	CCL16	FALSE	chr17	35981496	-	NA
8042532	0.0538971	1807	0.987847	0.0374057	VAX2	FALSE	chr2	70900589	+	NA
8022020	0.0539705	1808	0.987847	-0.0857038	RNU6-340P	FALSE	chr18	2649867	-	NA
8168843	0.0539811	1809	0.987847	0.0373924	RPL36A-HNRNPH2	FALSE	NA	NA	NA	NA
7971122	0.0539874	1810	0.987847	-0.072328	RNA5SP26	FALSE	chr13	37854970	-	NA
8023640	0.0540154	1811	0.987847	-0.0637689	RN7SL705P	FALSE	chr18	62650601	-	NA
7966172	0.0540291	1812	0.987847	-0.0504193	SVOP	FALSE	chr12	109021240	-	NA
8068130	0.0540568	1813	0.987847	-0.0583544	KRTAP13-1	FALSE	chr21	30396073	+	NA
8159967	0.0540818	1814	0.987847	0.0747549	NA	FALSE	NA	NA	NA	NA
7955983	0.0541586	1815	0.987847	-0.0583304	OR10A7	FALSE	chr12	55221024	+	NA
7894436	0.054178	1816	0.987847	0.0530627	NA	FALSE	NA	NA	NA	NA
7959080	0.054289	1817	0.987847	0.046181	SUDS3	FALSE	chr12	118376379	+	NA
8043431	0.0542959	1818	0.987847	0.123465	IGKV1D-33	FALSE	chr2	89913981	+	NA
8098725	0.054306	1819	0.987847	0.030974	DUX4	FALSE	chr4	190173773	+	NA
8048699	0.0543403	1820	0.987847	-0.0432054	NA	FALSE	NA	NA	NA	NA
7971486	0.0543779	1821	0.987847	-0.0582789	KIAA0226L	FALSE	chr13	46387233	-	NA
7894963	0.0543996	1822	0.987847	-0.0736303	NA	FALSE	NA	NA	NA	NA
7971369	0.0544547	1823	0.987847	-0.0582609	KCTD4	FALSE	chr13	45194717	-	NA
8076998	0.0545107	1824	0.987847	0.0426019	PLXNB2	TRUE	chr22	50307572	-	rs470119
8158167	0.0545449	1825	0.987847	-0.0477517	LCN2	FALSE	chr9	128149452	+	NA
8015572	0.0545548	1826	0.987847	0.041198	HCRT	FALSE	chr17	42185452	-	rs2293152; rs4796791; rs744166; rs9891119
8042270	0.0545587	1827	0.987847	0.0425932	UGP2	FALSE	chr2	63841709	+	NA
7896584	0.0546033	1828	0.987847	-0.109765	NA	FALSE	NA	NA	NA	NA
7941004	0.054613	1829	0.987847	0.0332215	CCDC88B	FALSE	chr11	64340222	+	rs694739
7915252	0.0546226	1830	0.987847	0.0653428	BMP8B	FALSE	chr1	39788861	-	NA
7940884	0.0547403	1831	0.987847	0.0372727	NUDT22	FALSE	chr11	64225940; 64226267; 64226274; 64226289; 64226289; 64226289; 64226299; 64226608; 64229130; 64229262; 64229301; 64229541	+	rs694739
7908022	0.0548062	1832	0.987847	-0.0321281	DHX9	FALSE	chr1	182839368	+	NA
8139113	0.0548293	1833	0.987847	-0.0720854	TRGV7	FALSE	NA	NA	NA	NA
8068168	0.0548648	1834	0.987847	-0.0321204	SOD1	TRUE	chr21	31659621	+	NA
8173823	0.0548959	1835	0.987847	-0.092442	RNU6-974P	FALSE	NA	NA	NA	NA
7991467	0.0549141	1836	0.987847	-0.0760154	RNA5SP401	FALSE	chr15	97472252	-	NA
8176941	0.054923	1837	0.987847	-0.125491	RBMY2AP	FALSE	NA	NA	NA	NA
8177393	0.054923	1838	0.987847	-0.125491	RBMY2AP	FALSE	NA	NA	NA	NA
8098344	0.0549296	1839	0.987847	-0.0581501	HAND2-AS1	FALSE	chr4	173530457	+	NA
8171271	0.0549829	1840	0.987847	-0.0513979	FAM9B	FALSE	NA	NA	NA	NA
8066598	0.0550013	1841	0.987847	-0.0299585	ACOT8	FALSE	chr20	45857406	-	rs2425752; rs4810485; rs6074022
8021131	0.0550224	1842	0.987847	-0.0394932	KATNAL2	FALSE	chr18	46946823	+	NA
8146198	0.0550954	1843	0.987847	-0.0394815	POLB	FALSE	chr8	42338454	+	NA
8088126	0.0551265	1844	0.987847	-0.0933369	NA	FALSE	NA	NA	NA	NA
7971561	0.0551747	1845	0.987847	-0.0662675	POLR2KP2	FALSE	NA	NA	NA	NA
8067351	0.0551942	1846	0.987847	0.0365063	PPP1R3D	FALSE	chr20	59940297	-	NA
8127743	0.055232	1847	0.987847	-0.0439748	HMGN3	FALSE	chr6	79234689; 79234689; 79234738	-	NA
8085714	0.0552324	1848	0.987847	0.0890799	NA	FALSE	NA	NA	NA	NA
8122881	0.055235	1849	0.987847	-0.0358616	NA	FALSE	NA	NA	NA	NA
8011193	0.0552589	1850	0.987847	-0.0501702	MIR22HG	FALSE	chr17	1716251	-	NA
8037898	0.0552996	1851	0.987847	-0.0480658	KPTN	FALSE	chr19	47484268; 47476187; 47484162; 47484176; 47484219; 47483578; 47484265; 47484261; 47483894	-	NA
8127989	0.0553273	1852	0.987847	-0.0758915	SNORD50B	FALSE	chr6	85677658	-	NA
7915971	0.0553448	1853	0.987847	-0.050153	AGBL4	FALSE	chr1	48663244	-	NA
8096027	0.0554248	1854	0.987847	-0.085213	PCAT4	FALSE	chr4	79827470	+	NA
8023261	0.0554269	1855	0.987847	0.065695	ACAA2	FALSE	chr18	49813960	-	NA
7991173	0.0554577	1856	0.987847	0.0371609	KLHL25	FALSE	chr15	85795030	-	NA
7982358	0.0555876	1857	0.987847	0.144248	ARHGAP11A	FALSE	chr15	32615143	+	NA
7917180	0.0556166	1858	0.987847	-0.109334	RNA5SP22	FALSE	chr1	78094915	-	NA
8139746	0.0556572	1859	0.987847	-0.0438999	PHKG1	FALSE	chr7	56092996	-	NA
8078497	0.0556631	1860	0.987847	-0.0370953	ARPP21	FALSE	chr3	35638944; 35639588; 35640254; 35640963; 35641420; 35642164; 35642289; 35642336; 35642339; 35643620; 35678818; 35679619; 35679620; 35679623; 35679626; 35679643; 35679744; 35679784; 35680936; 35680960; 35680999; 35681351; 35681496; 35682429; 35689313; 35690071; 35690074; 35690924; 35706973; 35714963; 35721635; 35738231; 35774791; 35781451; 35792176	+	NA
8050093	0.0556971	1861	0.987847	-0.0500825	NA	FALSE	chr2	4827084	-	NA
7905848	0.0557055	1862	0.987847	-0.0475299	LENEP	FALSE	chr1	154993587	+	NA
7953871	0.0557289	1863	0.987847	-0.0921416	NA	FALSE	chr12	9445057	+	rs10466829; rs11052877
7988625	0.0557712	1864	0.987847	0.0464714	FAM227B	FALSE	chr15	49620931	-	NA
7979902	0.055794	1865	0.987847	-0.0579505	NA	FALSE	NA	NA	NA	NA
8062016	0.0558247	1866	0.987847	-0.0321473	DYNLRB1	FALSE	chr20	34516443; 34516408; 34516413; 34516454	+	NA
8061416	0.0558447	1867	0.987847	-0.0500531	CST7	FALSE	chr20	24949229	+	NA
7953098	0.0558578	1868	0.987847	-0.0615401	NA	FALSE	NA	NA	NA	NA
8122440	0.0558702	1869	0.987847	0.0423596	LTV1	FALSE	chr6	143843343	+	NA
7916843	0.0559048	1870	0.987847	-0.0500412	GNG12	FALSE	chr1	67833467	-	NA
8025933	0.0559099	1871	0.987847	0.0464445	ZNF833P	FALSE	NA	NA	NA	NA
7921342	0.0559177	1872	0.987847	-0.0474897	LOC729866	FALSE	NA	NA	NA	NA
7895151	0.0559211	1873	0.987847	0.271009	NA	FALSE	NA	NA	NA	NA
7900857	0.0559349	1874	0.987847	-0.0319821	ST3GAL3	FALSE	chr1	43736262	+	NA
7893166	0.0559515	1875	0.987847	0.144019	NA	FALSE	NA	NA	NA	NA
8016628	0.0559792	1876	0.987847	0.0330327	PPP1R9B	FALSE	chr17	50150630	-	NA
8021015	0.0559993	1877	0.987847	-0.0321248	PIK3C3	FALSE	chr18	41955205	+	NA
8151679	0.056018	1878	0.987847	-0.0511861	DCAF4L2	FALSE	chr8	87874068	-	NA
7987634	0.0560243	1879	0.987847	-0.0578977	RN7SL497P	FALSE	chr15	41192265	-	NA
8153459	0.0560306	1880	0.987847	0.0314909	PYCRL	FALSE	chr8	143609614	-	NA
8091340	0.0560418	1881	0.987847	-0.050014	RNU6-505P	FALSE	chr3	146996713	-	NA
8122013	0.0560541	1882	0.987847	-0.0500115	L3MBTL3	FALSE	chr6	130018588	+	NA
8067183	0.0560637	1883	0.987847	0.0448308	RNU6-929P	FALSE	chr20	56786087	-	NA
7893210	0.0561089	1884	0.987847	0.102512	NA	FALSE	NA	NA	NA	NA
7893153	0.0561632	1885	0.987847	-0.0305133	NA	FALSE	NA	NA	NA	NA
7940341	0.0561674	1886	0.987847	-0.0474427	MS4A10	FALSE	chr11	60785347	+	rs34383631; rs650258
7969531	0.0562912	1887	0.987847	-0.0814557	RNY3P7	FALSE	chr13	77623371	+	NA
7944375	0.0563049	1888	0.987847	-0.0405679	TRAPPC4	FALSE	chr11	119018431	+	rs523604; rs533646
8107005	0.0563253	1889	0.987847	-0.0392876	CAST	FALSE	chr5	96662236	+	NA
8039607	0.0563418	1890	0.987847	-0.0478668	PEG3	FALSE	chr19	56840696; 56811283; 56840726; 56840696; 56825006; 56840696; 56824648; 56840662; 56840728; 56840709	-	NA
7937404	0.0563499	1891	0.987847	-0.0578234	LOC692247	FALSE	NA	NA	NA	NA
8044021	0.0564018	1892	0.987847	0.114801	IL1RL1	FALSE	chr2	102311567; 102337249; 102311528; 102337280; 102337287; 102337257; 102311501; 102337147; 102311501	+	NA
8099449	0.0564212	1893	0.987847	-0.03192	FBXL5	FALSE	chr4	15655412; 15644649; 15655341; 15655382; 15655341; 15655295; 15644678; 15659867; 15659864; 15681567; 15681554; 15681619; 15681679	-	NA
8146863	0.0564229	1894	0.987847	-0.0499386	SULF1	FALSE	chr8	69466623	+	NA
7893807	0.0564336	1895	0.987847	-0.0716315	NA	FALSE	NA	NA	NA	NA
8130807	0.0564618	1896	0.987847	-0.0542786	LOC441178	FALSE	NA	NA	NA	NA
8130980	0.0564618	1897	0.987847	-0.0542786	LOC441178	FALSE	NA	NA	NA	NA
8140403	0.0564663	1898	0.987847	0.0408704	SRCRB4D	FALSE	NA	NA	NA	NA
7971671	0.0564994	1899	0.987847	-0.0499235	GUCY1B2	FALSE	NA	NA	NA	NA
7896392	0.0565228	1900	0.987847	-0.0813825	NA	FALSE	NA	NA	NA	NA
7969675	0.056592	1901	0.987847	-0.0813606	NA	FALSE	NA	NA	NA	NA
7896656	0.0566075	1902	0.987847	-0.0856376	NA	FALSE	NA	NA	NA	NA
7892979	0.0566222	1903	0.987847	-0.0437319	NA	FALSE	NA	NA	NA	NA
7981530	0.0566679	1904	0.987847	0.0612908	GPR132	FALSE	chr14	105065430	-	NA
7894958	0.0567647	1905	0.987847	-0.14102	NA	FALSE	NA	NA	NA	NA
8008723	0.0567944	1906	0.987847	0.0456992	EPX	FALSE	chr17	58192736	+	NA
7893235	0.0568021	1907	0.987847	-0.102821	NA	FALSE	NA	NA	NA	NA
8024898	0.0568063	1908	0.987847	0.0462721	FEM1A	FALSE	chr19	4791680	+	NA
7939897	0.0568225	1909	0.987847	-0.102813	LOC101060256	FALSE	NA	NA	NA	NA
7896528	0.0568275	1910	0.987847	0.0369508	NA	FALSE	NA	NA	NA	NA
8167575	0.0568748	1911	0.987847	0.0625609	GAGE1	FALSE	NA	NA	NA	NA
8061114	0.0568841	1912	0.987847	-0.0577022	DSTN	FALSE	chr20	17570081	+	NA
7997139	0.0568907	1913	0.987847	-0.0385678	CALB2	FALSE	chr16	71358715	+	NA
7966810	0.0569327	1914	0.987847	0.0407919	KSR2	FALSE	chr12	117968223	-	NA
8160767	0.0570102	1915	0.987847	0.0884106	NA	FALSE	NA	NA	NA	NA
8110920	0.0570183	1916	0.987847	0.052434	FASTKD3	FALSE	chr5	7869002	-	NA
7976241	0.0570288	1917	0.987847	0.0524317	NA	FALSE	NA	NA	NA	NA
7893958	0.0570861	1918	0.987847	-0.0607408	NA	FALSE	NA	NA	NA	NA
7901479	0.0570912	1919	0.987847	-0.0657703	ZYG11B	FALSE	chr1	52726508	+	NA
8120067	0.0571882	1920	0.987847	0.0652121	SLC25A27	FALSE	chr6	46652940	+	NA
7907032	0.0571906	1921	0.987847	-0.0612192	MAEL	FALSE	chr1	166989088	+	NA
8116740	0.0571944	1922	0.987847	0.0366114	RREB1	FALSE	chr6	7108030	+	NA
7942896	0.0572813	1923	0.987847	-0.0576128	CCDC83	FALSE	chr11	85855396	+	NA
8151118	0.0573108	1924	0.987847	0.0368776	VCPIP1	FALSE	chr8	66667217	-	NA
8121886	0.057365	1925	0.987847	0.0461658	HINT3	FALSE	chr6	125956780	+	NA
7893572	0.057376	1926	0.987847	0.0639252	NA	FALSE	NA	NA	NA	NA
8098121	0.0574232	1927	0.987847	-0.0509038	RAPGEF2	FALSE	chr4	159267736	+	NA
7982076	0.0574306	1928	0.987847	-0.0540728	SNORD115-35	FALSE	chr15	25234246	+	NA
7940153	0.0574416	1929	0.987847	0.0368579	FAM111A	FALSE	chr11	59142747; 59142844; 59142855; 59142856; 59142858; 59144778; 59144778; 59144798; 59144861; 59145062; 59148244	+	NA
7963280	0.0574566	1930	0.987847	-0.0656771	SMAGP	FALSE	chr12	51270890	-	NA
7896177	0.0574614	1931	0.987847	-0.140654	NA	FALSE	NA	NA	NA	NA
8082572	0.0575049	1932	0.987847	-0.0713341	RNU6-1142P	FALSE	NA	NA	NA	NA
7923438	0.0575338	1933	0.987847	0.0312974	RPS27	FALSE	chr1	153990758	+	NA
7955358	0.0575391	1934	0.987847	-0.0403706	COX14	FALSE	chr12	50112203	+	NA
7963491	0.0575525	1935	0.987847	-0.0497175	KRT1	FALSE	chr12	52680407	-	NA
8098758	0.0576054	1936	0.987847	0.0455472	ZNF721	FALSE	chr4	499156	-	NA
8170015	0.0576194	1937	0.987847	0.0495076	ZNF449	FALSE	NA	NA	NA	NA
7959354	0.0576512	1938	0.987847	-0.0403529	BCL7A	FALSE	chr12	122021885	+	NA
8008704	0.0576804	1939	0.987847	-0.0508527	RN7SKP94	FALSE	chr17	57789448	+	NA
8071981	0.0577053	1940	0.987847	-0.140527	KIAA1671	FALSE	chr22	25027973	+	NA
7951437	0.0577058	1941	0.987847	0.0522858	GUCY1A2	FALSE	chr11	107018524	-	NA
8020129	0.0578818	1942	0.987847	-0.0354863	VAPA	FALSE	chr18	9914061	+	NA
8076826	0.0580005	1943	0.987847	-0.075107	C22orf34	FALSE	chr22	49624920	-	NA
8134122	0.0580118	1944	0.987847	-0.035205	AKAP9	FALSE	chr7	91940866; 91940915; 91940915; 91940925; 91941099; 91941099; 91973755; 92040703; 92057625; 92070137; 92083575; 92091988; 92097159; 92098153; 92102588; 92105676	+	NA
8003859	0.0580554	1945	0.987847	-0.145885	NA	FALSE	NA	NA	NA	NA
7928314	0.0580577	1946	0.987847	-0.0851623	RNU6-805P	FALSE	chr10	72391963	+	NA
7971184	0.0580634	1947	0.987847	-0.0470907	MRPS31	FALSE	chr13	40771173	-	NA
8086660	0.058095	1948	0.987847	0.0701085	PRSS50	FALSE	chr3	46717883	-	NA
7958425	0.0581056	1949	0.987847	-0.0539312	DAO	FALSE	chr12	108880029	+	NA
7977598	0.0581406	1950	0.987847	-0.0627412	RNASE11	FALSE	chr14	20587725	-	NA
8124562	0.0581779	1951	0.987847	-0.0470697	ZSCAN31	FALSE	chr6	28336134	-	NA
8111772	0.0581859	1952	0.987847	-0.0922438	DAB2	FALSE	chr5	39425233	-	NA
8114628	0.0582734	1953	0.987847	0.0304715	HARS	FALSE	chr5	140691341	-	NA
7931168	0.0583525	1954	0.987847	0.0444112	ACADSB	FALSE	chr10	123009015	+	NA
8168280	0.0583751	1955	0.987847	0.030459	NONO	TRUE	NA	NA	NA	NA
7948879	0.058414	1956	0.987847	-0.0710853	RNU6-118P	FALSE	chr11	62816067	-	NA
7984511	0.0584239	1957	0.987847	-0.0402313	LINC00277	FALSE	NA	NA	NA	NA
8106814	0.0584256	1958	0.987847	-0.0434239	NA	FALSE	NA	NA	NA	NA
7915345	0.0584756	1959	0.987847	0.0398564	NFYC-AS1	FALSE	chr1	40692066	-	NA
7954965	0.0584827	1960	0.987847	-0.102168	RNU6-249P	FALSE	chr12	42398549	+	NA
8172270	0.0585058	1961	0.987847	-0.0710604	NA	FALSE	NA	NA	NA	NA
8008038	0.0585191	1962	0.987847	0.14244	NA	FALSE	NA	NA	NA	NA
7942586	0.0585627	1963	0.987847	0.0326861	RPS3	FALSE	chr11	75399530	+	NA
7895711	0.0585856	1964	0.987847	-0.102129	NA	FALSE	NA	NA	NA	NA
7957032	0.0586208	1965	0.987847	0.0710362	YEATS4	FALSE	chr12	69359702	+	NA
7945058	0.0586376	1966	0.987847	0.0366795	FAM118B	FALSE	chr11	126211413	+	NA
7892763	0.0586539	1967	0.987847	-0.0710202	NA	FALSE	NA	NA	NA	NA
8061471	0.0586869	1968	0.987847	0.064244	GINS1	FALSE	chr20	25407726	+	NA
7921621	0.0586951	1969	0.987847	-0.102087	NA	FALSE	NA	NA	NA	NA
7907012	0.0587363	1970	0.987847	-0.0494896	FMO9P	FALSE	NA	NA	NA	NA
7894846	0.05883	1971	0.987847	-0.0353552	NA	FALSE	NA	NA	NA	NA
8006325	0.0588566	1972	0.987847	-0.0347137	SUZ12	FALSE	chr17	31937017	+	NA
8034370	0.058872	1973	0.987847	0.0698854	ZNF563	FALSE	chr19	12333688	-	NA
7957532	0.0589175	1974	0.987847	-0.0572494	NA	FALSE	NA	NA	NA	NA
7957536	0.0589479	1975	0.987847	-0.0469297	NUDT4	FALSE	chr12	93377882	+	NA
7919133	0.0589716	1976	0.987847	0.0763501	FCGR1A	FALSE	chr1	149782689	+	NA
8055980	0.0589857	1977	0.987847	0.0404526	CYTIP	FALSE	chr2	157444142	-	NA
8127141	0.0590196	1978	0.987847	-0.0564689	NA	FALSE	NA	NA	NA	NA
8066264	0.0590589	1979	0.987847	-0.0748045	NA	FALSE	NA	NA	NA	NA
7915277	0.0590773	1980	0.987847	-0.0433146	MYCL	FALSE	chr1	39901882	-	NA
8080909	0.0590973	1981	0.987847	-0.05721	RN7SL482P	FALSE	chr3	66323854	+	NA
8052834	0.0591114	1982	0.987847	0.0366096	C2orf42	FALSE	chr2	70191071	-	NA
8041808	0.0591123	1983	0.987847	0.0532656	RHOQ	FALSE	chr2	46542727	+	NA
8085033	0.0591714	1984	0.987847	0.0519747	LMLN	FALSE	chr3	197960221	+	NA
8086417	0.0591754	1985	0.987847	0.0606624	RN7SL567P	FALSE	chr3	42676491	-	NA
8053429	0.0592174	1986	0.987847	0.0404149	GGCX	FALSE	chr2	85561509	-	NA
7896408	0.0592841	1987	0.987847	-0.0980085	NA	FALSE	NA	NA	NA	NA
7895800	0.059308	1988	0.987847	-0.104974	NA	FALSE	NA	NA	NA	NA
8122672	0.0593123	1989	0.987847	-0.0346525	TAB2	FALSE	chr6	149218640; 149318581; 149321051; 149321051; 149342656; 149342812; 149397691	+	NA
7907010	0.0593532	1990	0.987847	-0.104956	FMO8P	FALSE	NA	NA	NA	NA
7906988	0.0593534	1991	0.987847	-0.057154	LOC440700	FALSE	NA	NA	NA	NA
7967418	0.0593655	1992	0.987847	0.0731188	RNA5SP375	FALSE	chr12	123283034	-	rs1790100; rs7132277; rs949143
8043745	0.0593843	1993	0.987847	0.0519301	NA	FALSE	NA	NA	NA	NA
8166059	0.0594061	1994	0.987847	0.0640563	TLR7	FALSE	NA	NA	NA	NA
7898675	0.0594095	1995	0.987847	-0.0681254	NA	FALSE	NA	NA	NA	NA
7962201	0.0594538	1996	0.987847	-0.0571322	NA	FALSE	NA	NA	NA	NA
7931571	0.0595037	1997	0.987847	0.032563	PRAP1	FALSE	chr10	133347367	+	NA
8023394	0.059528	1998	0.987847	-0.0640484	STARD6	FALSE	chr18	54354573	-	NA
8023549	0.0595331	1999	0.987847	0.0379209	RAX	FALSE	chr18	59273393	-	NA
[truncated: 31,298 more rows]

## Sheet: B cells, all
Transcript Cluster ID	p Value	Rank	False Discovery Rate	est. % diff in expression	Gene Name	Control Gene	Chromosome(s)	Hg38 Transcription Start Site(s)	Hg38 Strand	MS Risk SNPs within 500kb
8128698	4.39311e-08	1	0.00146277	0.409302	SESN1	FALSE	chr6	109009555	-	NA
7938364	6.63102e-06	2	0.0685468	0.336209	WEE1	FALSE	chr11	9575489	+	NA
8080991	6.97195e-06	3	0.0685468	-0.0707483	HNRNPA3	FALSE	chr2	177212562	+	NA
7952986	8.23459e-06	4	0.0685468	-0.120881	WNK1	FALSE	chr12	752922	+	NA
7999423	1.81605e-05	5	0.100849	0.158867	SOCS1	FALSE	chr16	11256179	-	rs12708716; rs12927355; rs4780346; rs6498184; rs7191700; rs7200786
8129097	1.88636e-05	6	0.100849	0.197873	TSPYL1	FALSE	chr6	116279903	-	NA
7928308	2.2125e-05	7	0.100849	0.242748	DDIT4	FALSE	chr10	72273919	+	NA
8046590	2.42302e-05	8	0.100849	-0.0666023	HNRNPA3	FALSE	chr2	177212562	+	NA
7895181	3.4299e-05	9	0.126895	-0.16374	NA	FALSE	NA	NA	NA	NA
7971920	3.86427e-05	10	0.128669	-0.0745278	HNRNPA3	FALSE	chr2	177212562	+	NA
8066072	4.71551e-05	11	0.142032	-0.126352	NA	FALSE	NA	NA	NA	NA
8125919	5.11871e-05	12	0.142032	0.297657	FKBP5	FALSE	chr6	35728583	-	NA
7943984	5.70473e-05	13	0.146116	0.295536	ZBTB16	FALSE	chr11	114060506	+	NA
8058905	0.000113723	14	0.258219	0.327086	CXCR1	FALSE	chr2	218166995	-	NA
8128572	0.000122397	15	0.258219	-0.0630885	PREP	FALSE	chr6	105403084	-	NA
8067279	0.00012408	16	0.258219	-0.109215	CTSZ	FALSE	chr20	59007247	-	NA
8143307	0.000144349	17	0.282728	0.111469	HIPK2	FALSE	chr7	139777778	-	NA
7894239	0.000191542	18	0.354321	-0.0590759	NA	FALSE	NA	NA	NA	NA
8140737	0.00023493	19	0.387795	0.117213	NA	FALSE	NA	NA	NA	NA
8053610	0.000240401	20	0.387795	-0.0518565	LOC285074	FALSE	NA	NA	NA	NA
7939420	0.000244578	21	0.387795	0.171534	NA	FALSE	NA	NA	NA	NA
8058127	0.000284557	22	0.430677	0.0810501	CLK1	FALSE	chr2	200864561	-	NA
8161701	0.000312457	23	0.440176	0.113729	TMEM2	FALSE	chr9	71768386	-	NA
8049544	0.000317273	24	0.440176	-0.0988092	LRRFIP1	FALSE	chr2	237627575	+	NA
7893350	0.000386802	25	0.481908	0.15757	NA	FALSE	NA	NA	NA	NA
7893444	0.000389313	26	0.481908	0.122206	NA	FALSE	NA	NA	NA	NA
8038395	0.000390771	27	0.481908	-0.0645605	NOSIP	FALSE	chr19	49560630; 49580535; 49580558; 49580572; 49580555; 49557295; 49560049; 49590262; 49560691; 49580532; 49580556; 49579278; 49560050; 49560397; 49560037; 49580547	-	rs2303759; rs8107548
8102713	0.000443595	28	0.500882	0.106289	NUDT6	FALSE	chr4	122922606	-	NA
7938348	0.000446879	29	0.500882	0.155748	WEE1	FALSE	chr11	9574686	+	NA
7973840	0.000480911	30	0.500882	-0.0652224	ARHGAP5	FALSE	chr14	32077288	+	NA
7909586	0.000490881	31	0.500882	-0.0581664	PPP2R5A	FALSE	chr1	212301805	+	NA
8131573	0.000499103	32	0.500882	0.162134	ARL4A	FALSE	chr7	12686907	+	NA
8042109	0.000500318	33	0.500882	-0.13949	RNU6-508P	FALSE	chr2	59647620	+	NA
8172504	0.000514508	34	0.500882	-0.0551224	GRIPAP1	FALSE	NA	NA	NA	NA
8088848	0.00054004	35	0.500882	0.0777337	PDZRN3	FALSE	chr3	73624940	-	NA
8101304	0.000561912	36	0.500882	-0.0892815	RASGEF1B	FALSE	chr4	81471915	-	NA
7938366	0.000586096	37	0.500882	0.277483	WEE1	FALSE	chr11	9575489	+	NA
7896704	0.000589922	38	0.500882	0.0976425	NA	FALSE	NA	NA	NA	NA
8014956	0.000656534	39	0.500882	0.0741442	NR1D1	FALSE	chr17	40100725	-	rs12946510
8072757	0.000660103	40	0.500882	0.0786954	CSF2RB	FALSE	chr22	36913627	+	NA
7949104	0.00066384	41	0.500882	-0.0448306	RASGRP2	FALSE	chr11	64744834	-	rs694739
8049042	0.000691232	42	0.500882	-0.13055	RNU1-93P	FALSE	chr2	231133461	+	NA
7900426	0.000693004	43	0.500882	0.0738109	SMAP2	FALSE	chr1	40374647	+	NA
8126312	0.000706066	44	0.500882	0.0760363	TFEB	FALSE	chr6	41735527	-	NA
8180223	0.000713757	45	0.500882	-0.10849	NA	FALSE	NA	NA	NA	NA
7965335	0.000720115	46	0.500882	0.157157	DUSP6	FALSE	chr12	89353271	-	NA
8132349	0.000721634	47	0.500882	0.149593	NME8	FALSE	chr7	37848596	+	NA
8161919	0.000722056	48	0.500882	0.13003	TLE1	FALSE	chr9	81689305	-	NA
7980454	0.000812307	49	0.547679	0.0855245	ALKBH1	FALSE	chr14	77708020	-	NA
7896138	0.000822414	50	0.547679	-0.113917	NA	FALSE	NA	NA	NA	NA
7901336	0.000861298	51	0.555385	0.0761958	STRADB	FALSE	chr2	201451795	+	NA
7920472	0.000867345	52	0.555385	-0.0628801	TPM3	FALSE	chr1	154183130	-	NA
8161986	0.000932736	53	0.585987	-0.18735	RNU4-15P	FALSE	chr9	83596584	-	NA
7964640	0.000957108	54	0.590163	-0.209639	RNU6-595P	FALSE	chr12	62334197	-	NA
7896247	0.00100413	55	0.593348	-0.0621307	NA	FALSE	NA	NA	NA	NA
7893644	0.00103209	56	0.593348	0.103028	NA	FALSE	NA	NA	NA	NA
8140942	0.00103472	57	0.593348	-0.0598779	FAM133B	FALSE	chr7	92590393	-	NA
7899192	0.00107533	58	0.593348	-0.0519851	RPS6KA1	FALSE	chr1	26545851	+	NA
8046515	0.00107676	59	0.593348	-0.0205747	H3F3A	TRUE	chr1	226062677	+	NA
8083739	0.00109063	60	0.593348	0.15139	MIR16-2	FALSE	chr3	160404744	+	rs1014486; rs2243123; rs4680534
8089314	0.00110159	61	0.593348	0.0925062	IFT57	FALSE	chr3	108222570	-	NA
7942832	0.00113008	62	0.593348	0.150889	DDIAS	FALSE	chr11	82901726	+	NA
7912784	0.00113692	63	0.593348	-0.059406	CROCCP3	FALSE	NA	NA	NA	NA
7983890	0.00114047	64	0.593348	-0.131009	GCOM1	FALSE	chr15	57591907	+	NA
8143341	0.00119472	65	0.604572	-0.0666799	KDM7A	FALSE	chr7	140177035	-	NA
7977075	0.00119836	66	0.604572	0.146497	SNORA28	FALSE	chr14	103337848	+	NA
8010260	0.00128803	67	0.612051	0.0699026	BIRC5	FALSE	chr17	78214185	+	NA
8081277	0.00129178	68	0.612051	0.0709341	NIT2	FALSE	chr3	100334700	+	NA
8002792	0.00133838	69	0.612051	-0.0797173	FA2H	FALSE	chr16	74717106	-	NA
7960544	0.00136798	70	0.612051	-0.0777025	VAMP1	TRUE	chr12	6470677	-	rs12296430; rs1800693
7979808	0.00137795	71	0.612051	-0.0830842	NA	FALSE	NA	NA	NA	NA
7978644	0.00138619	72	0.612051	0.0784374	NFKBIA	TRUE	chr14	35404746	-	NA
8151306	0.00138634	73	0.612051	0.140917	RN7SL19P	FALSE	chr8	70654883	-	NA
8021113	0.00140031	74	0.612051	-0.065774	C18orf25	FALSE	chr18	46174033	+	NA
8153678	0.00142717	75	0.612051	-0.066194	BOP1	FALSE	chr8	144291370	-	NA
8019762	0.00146454	76	0.612051	0.0562228	P4HB	TRUE	chr17	81860694	-	NA
8098500	0.00150676	77	0.612051	0.0638377	CDKN2AIP	FALSE	chr4	183444590	+	NA
7954711	0.00150747	78	0.612051	0.0531701	KIAA1551	FALSE	chr12	31959418	+	NA
8180312	0.0015159	79	0.612051	-0.0504607	NA	FALSE	NA	NA	NA	NA
8171199	0.00152965	80	0.612051	0.159587	NA	FALSE	NA	NA	NA	NA
8126542	0.00153448	81	0.612051	0.0762046	ZNF318	FALSE	chr6	43369443	-	NA
8054939	0.00157953	82	0.612051	0.12102	RN7SKP102	FALSE	chr2	123869570	-	NA
8159439	0.00159982	83	0.612051	0.0759017	C9orf172	FALSE	chr9	136844414	+	NA
7951140	0.00160709	84	0.612051	-0.121962	LOC100131541	FALSE	NA	NA	NA	NA
8157270	0.00160714	85	0.612051	0.110395	SLC31A1	FALSE	chr9	113221561	+	NA
7903676	0.00161101	86	0.612051	-0.0564648	ATXN7L2	FALSE	chr1	109483478; 109483938; 109483938; 109485545; 109489339; 109489550; 109491015	+	NA
8005202	0.00162158	87	0.612051	0.120709	SNORD49A	FALSE	chr17	16440035	+	NA
7967624	0.00162394	88	0.612051	0.0694246	SLC15A4	FALSE	chr12	128823983	-	NA
8083090	0.00163596	89	0.612051	0.0915243	ZBTB38	FALSE	chr3	141387811	+	NA
8114145	0.00169156	90	0.625821	0.0888521	VDAC1	FALSE	chr5	134005133	-	rs756699
7893460	0.00177646	91	0.630549	-0.05712	NA	FALSE	NA	NA	NA	NA
7945418	0.00177972	92	0.630549	0.0987358	RN7SL838P	FALSE	chr11	440693	-	NA
7892879	0.00179982	93	0.630549	0.257193	NA	FALSE	NA	NA	NA	NA
8000848	0.00181749	94	0.630549	-0.0570007	CD2BP2	FALSE	chr16	30354934	-	rs7204270
8102936	0.00182858	95	0.630549	-0.147571	NA	FALSE	NA	NA	NA	NA
8117598	0.00184202	96	0.630549	0.172989	HIST1H4K	FALSE	chr6	27831527	-	NA
7917676	0.00185039	97	0.630549	-0.0756478	GLMN	FALSE	chr1	92298976	-	rs11810217; rs41286801
7895145	0.00185584	98	0.630549	-0.0989803	NA	FALSE	NA	NA	NA	NA
8151492	0.00189967	99	0.633399	0.0938764	RNU2-71P	FALSE	chr8	80585773	-	NA
8081657	0.00190227	100	0.633399	0.11881	CD200	FALSE	chr3	112333155	+	NA
8160718	0.00193497	101	0.637909	-0.0439564	PTEN	FALSE	chr10	87863112	+	NA
8015969	0.00200562	102	0.645434	-0.0407719	UBTF	FALSE	chr17	44220963	-	NA
8008706	0.00203327	103	0.645434	-0.0509958	DYNLL2	FALSE	chr17	58083414	+	NA
8124630	0.00208401	104	0.645434	0.0870337	OR2W1	FALSE	chr6	29045240	-	NA
8178283	0.00208401	105	0.645434	0.0870337	OR2W1	FALSE	chr6	29045240	-	NA
8179587	0.00208401	106	0.645434	0.0870337	OR2W1	FALSE	chr6	29045240	-	NA
8167878	0.00209319	107	0.645434	0.178313	NA	FALSE	NA	NA	NA	NA
8152522	0.00214584	108	0.645434	-0.20153	ENPP2	FALSE	chr8	119638839	-	NA
8119237	0.00215522	109	0.645434	-0.0698718	LOC100132005	FALSE	NA	NA	NA	NA
8020930	0.00218956	110	0.645434	-0.0697874	ELP2	FALSE	chr18	36129897	+	NA
7990033	0.00219123	111	0.645434	0.0593385	TLE3	FALSE	chr15	70096844	-	NA
8030362	0.00220645	112	0.645434	-0.0966147	SNORD33	FALSE	chr19	49490614	+	rs2303759; rs8107548
7964271	0.00220747	113	0.645434	-0.0684949	PRIM1	FALSE	chr12	56752335	-	NA
8050801	0.00221307	114	0.645434	0.21141	NA	FALSE	NA	NA	NA	NA
8047443	0.00225033	115	0.645434	0.0683307	STRADB	FALSE	chr2	201451795	+	NA
8124413	0.00225445	116	0.645434	0.140924	HIST1H4D	FALSE	chr6	26189076	-	NA
8055261	0.00226795	117	0.645434	0.0554504	WTH3DI	FALSE	NA	NA	NA	NA
8049540	0.00234232	118	0.654903	-0.0960767	LRRFIP1	FALSE	chr2	237627575	+	NA
7942342	0.00235132	119	0.654903	-0.0431494	INPPL1	FALSE	chr11	72224780	+	NA
7894544	0.00236022	120	0.654903	0.209943	NA	FALSE	NA	NA	NA	NA
7894096	0.0023816	121	0.655372	-0.173374	NA	FALSE	NA	NA	NA	NA
8051583	0.00241487	122	0.657167	0.119532	CYP1B1	FALSE	chr2	38076181	-	NA
8180295	0.00244568	123	0.657167	-0.0912433	NA	FALSE	NA	NA	NA	NA
8081431	0.00244769	124	0.657167	0.0795583	ALCAM	FALSE	chr3	105367342	+	rs2028597
8180310	0.00247842	125	0.657167	-0.0567833	NA	FALSE	NA	NA	NA	NA
8157698	0.0024868	126	0.657167	0.0794276	OR1K1	FALSE	chr9	122800122	+	NA
8026090	0.00254461	127	0.667149	-0.0566379	GCDH	FALSE	chr19	12891025; 12891159; 12891159; 12891159; 12891163; 12891165; 12891167; 12891176; 12891179; 12891179; 12891179; 12891268; 12891268; 12897302; 12897379; 12899570	+	NA
8122877	0.00261367	128	0.668366	0.150997	NA	FALSE	NA	NA	NA	NA
8073522	0.00262044	129	0.668366	0.0715384	SREBF2	FALSE	chr22	41833104	+	NA
8140907	0.00262465	130	0.668366	-0.121779	NA	FALSE	NA	NA	NA	NA
8103437	0.00262954	131	0.668366	0.0849734	PPID	FALSE	chr4	158723396	-	NA
7938816	0.00267173	132	0.671145	0.0502502	ZDHHC13	FALSE	chr11	19117144	+	NA
8005048	0.00268079	133	0.671145	0.0683944	MYOCD	FALSE	chr17	12665988	+	NA
8019563	0.0027544	134	0.684427	0.245492	MGC70870	FALSE	NA	NA	NA	NA
7998978	0.00278354	135	0.684687	0.0892648	ZNF597	FALSE	chr16	3443542	-	NA
8167013	0.00284196	136	0.684687	0.130935	JADE3	FALSE	NA	NA	NA	NA
7967636	0.00287135	137	0.684687	0.104021	NA	FALSE	NA	NA	NA	NA
7893958	0.00287819	138	0.684687	-0.0795356	NA	FALSE	NA	NA	NA	NA
8124397	0.00288725	139	0.684687	-0.120676	HIST1H1C	FALSE	chr6	26056428	-	NA
8081107	0.0029023	140	0.684687	0.137159	RNU6-712P	FALSE	chr3	90184633	+	NA
8055096	0.00292732	141	0.684687	0.0597357	AMMECR1L	FALSE	chr2	127885922	-	NA
7896202	0.00293699	142	0.684687	-0.230571	NA	FALSE	NA	NA	NA	NA
8157246	0.00297728	143	0.684687	-0.0822362	KIAA1958	FALSE	chr9	112486967	+	NA
7968236	0.00299893	144	0.684687	0.130166	RASL11A	FALSE	chr13	27270326	+	NA
8044640	0.00301852	145	0.684687	0.0662712	LOC729468	FALSE	NA	NA	NA	NA
8092455	0.0030497	146	0.684687	-0.10158	NA	FALSE	NA	NA	NA	NA
7893482	0.00306981	147	0.684687	-0.114912	NA	FALSE	NA	NA	NA	NA
7950299	0.00308799	148	0.684687	-0.0815655	NA	FALSE	NA	NA	NA	NA
8011112	0.00311248	149	0.684687	-0.117303	NA	FALSE	NA	NA	NA	NA
8142100	0.00313187	150	0.684687	0.0750913	ATXN7L1	FALSE	chr7	105876604	-	NA
7892573	0.00316193	151	0.684687	0.135866	NA	FALSE	NA	NA	NA	NA
7893966	0.00316857	152	0.684687	-0.0718481	NA	FALSE	NA	NA	NA	NA
7928959	0.00316934	153	0.684687	-0.0494658	PTEN	FALSE	chr10	87863112	+	NA
8105504	0.0032384	154	0.684687	-0.0528105	FAM133B	FALSE	chr7	92590393	-	NA
8100306	0.00325416	155	0.684687	0.128993	RNU6-158P	FALSE	chr4	48932854	-	NA
7926708	0.00329596	156	0.684687	0.102465	THNSL1	FALSE	chr10	25016657	+	NA
8003087	0.00329839	157	0.684687	-0.0886134	RNA5SP432	FALSE	chr16	84040033	-	NA
8124521	0.00330032	158	0.684687	0.202201	HIST1H4K	FALSE	chr6	27831527	-	NA
7981530	0.00334072	159	0.684687	0.0567798	GPR132	FALSE	chr14	105065430	-	NA
8013965	0.00334832	160	0.684687	0.0532344	SSH2	FALSE	chr17	29930093	-	NA
7896137	0.00336977	161	0.684687	-0.059691	NA	FALSE	NA	NA	NA	NA
7920616	0.00339892	162	0.684687	-0.071338	DCST2	FALSE	chr1	155033760	-	NA
7897520	0.00340225	163	0.684687	0.12835	RN7SKP269	FALSE	chr1	9947317	+	rs10492972
7894985	0.00344375	164	0.684687	-0.171535	NA	FALSE	NA	NA	NA	NA
8180294	0.00346736	165	0.684687	-0.118527	NA	FALSE	NA	NA	NA	NA
8129193	0.00349521	166	0.684687	-0.0761276	CEP85L	FALSE	chr6	118651891	-	NA
7936661	0.00351925	167	0.684687	0.0641252	PRDX3	FALSE	chr10	119178833	-	NA
8018982	0.00352848	168	0.684687	0.0641067	CANT1	FALSE	chr17	79009778	-	NA
8151890	0.00353611	169	0.684687	0.091874	TP53INP1	FALSE	chr8	94949366	-	NA
8022531	0.00354739	170	0.684687	0.0651181	NPC1	FALSE	chr18	23586898	-	NA
7892714	0.0035744	171	0.684687	0.353379	NA	FALSE	NA	NA	NA	NA
8107100	0.00358595	172	0.684687	0.0584385	RGMB	FALSE	chr5	98769294	+	NA
8068761	0.00359331	173	0.684687	-0.118639	ABCG1	FALSE	chr21	42219117	+	NA
8033767	0.00361332	174	0.684687	0.0962463	ZNF560	FALSE	chr19	9498607	-	NA
8018352	0.00365727	175	0.684687	-0.0600204	SLC25A19	FALSE	chr17	75289390	-	NA
8000329	0.00368155	176	0.684687	0.0511978	PALB2	FALSE	chr16	23641310	-	NA
8180194	0.00371658	177	0.684687	-0.0860394	NA	FALSE	NA	NA	NA	NA
8180288	0.00371658	178	0.684687	-0.0860394	NA	FALSE	NA	NA	NA	NA
8180293	0.00371658	179	0.684687	-0.0860394	NA	FALSE	NA	NA	NA	NA
8136662	0.0037174	180	0.684687	0.160236	MGAM	FALSE	chr7	141995837	+	NA
7981481	0.00372666	181	0.684687	0.0526128	C14orf2	TRUE	chr14	103921501	-	NA
8064245	0.00375326	182	0.684687	-0.054949	TCEA2	FALSE	chr20	64063143	+	rs2256814; rs6062314
7957608	0.00376304	183	0.684687	0.110439	MIR492	FALSE	chr12	94834397	+	NA
8124574	0.00380682	184	0.688889	0.0626303	ZSCAN12	FALSE	chr6	28399734; 28399731	-	NA
7935421	0.00386511	185	0.68924	0.0634602	FRAT2	FALSE	chr10	97334709	-	NA
8113489	0.00387574	186	0.68924	-0.0796954	NA	FALSE	chr5	110684927	-	NA
8118634	0.00389255	187	0.68924	-0.0460342	RING1	TRUE	chr6	33208494	+	NA
7892568	0.00391644	188	0.68924	-0.0587625	NA	FALSE	NA	NA	NA	NA
7953341	0.00391707	189	0.68924	0.0756112	TAPBPL	FALSE	chr12	6452083	+	rs12296430; rs1800693
8076754	0.00393295	190	0.68924	0.0755765	PKDREJ	FALSE	chr22	46263355	-	NA
8026047	0.00403124	191	0.694621	-0.0987498	JUNB	FALSE	chr19	12791495	+	NA
8105778	0.00403302	192	0.694621	-0.0476127	PIK3R1	FALSE	chr5	68292567	+	NA
7963869	0.00406036	193	0.694621	-0.0575587	PHC1	FALSE	chr12	8914740	+	NA
8180296	0.00406311	194	0.694621	-0.0867337	NA	FALSE	NA	NA	NA	NA
7975459	0.0040993	195	0.694621	0.064072	SIPA1L1	FALSE	chr14	71529324	+	NA
7933760	0.0040999	196	0.694621	0.0575702	CCDC6	FALSE	chr10	59906656	-	NA
8014264	0.00411389	197	0.694621	0.0903111	PEX12	FALSE	chr17	35578637	-	NA
7915045	0.00413055	198	0.694621	0.0728154	C1orf109	FALSE	chr1	37690520	-	NA
7974533	0.00418131	199	0.699624	-0.0573782	PELI2	FALSE	chr14	56118374	+	NA
7953812	0.00421464	200	0.699802	-0.0573293	PHC1	FALSE	chr12	8914740	+	NA
7894576	0.00423392	201	0.699802	0.225973	NA	FALSE	NA	NA	NA	NA
8012349	0.00424543	202	0.699802	-0.0696982	PER1	FALSE	chr17	8152435	-	NA
8068305	0.00430954	203	0.705575	0.0572443	ITSN1	FALSE	chr21	33642477	+	NA
7895820	0.00435216	204	0.705575	0.195675	NA	FALSE	NA	NA	NA	NA
8111922	0.00435352	205	0.705575	0.0747032	LOC648987	FALSE	NA	NA	NA	NA
8002711	0.00436521	206	0.705575	0.0571602	RPSAP56	FALSE	NA	NA	NA	NA
8165552	0.00442814	207	0.712289	-0.0742591	NSMF	FALSE	chr9	137459334	-	NA
8061481	0.00447148	208	0.715803	0.0851831	RNU6ATAC17P	FALSE	chr20	25611152	+	NA
8146243	0.00453849	209	0.719775	-0.0538408	HOOK3	FALSE	chr8	42896931	+	NA
8113073	0.0045522	210	0.719775	-0.110392	ARRDC3	FALSE	chr5	91383359	-	NA
7931832	0.00456115	211	0.719775	0.141712	AKR1C2	FALSE	chr10	5003860; 5003861; 5004014; 5004023; 5004023; 5015048; 5015892; 5017934; 5017955; 5018031; 5135226	-	NA
8011375	0.00459556	212	0.721785	0.0568223	TRPV1	FALSE	chr17	3597098	-	NA
8039530	0.00465835	213	0.728211	-0.0402021	ZNF784	FALSE	chr19	55624601	-	NA
7969576	0.00474392	214	0.737619	0.107495	MIR17HG	FALSE	chr13	91347819	+	NA
7952522	0.00478077	215	0.737619	0.0738917	PUS3	FALSE	chr11	125903221	-	NA
7922482	0.00480667	216	0.737619	0.123284	TNR	FALSE	chr1	175743616	-	NA
7895549	0.00482092	217	0.737619	-0.186727	NA	FALSE	NA	NA	NA	NA
7894727	0.00482929	218	0.737619	0.130012	NA	FALSE	NA	NA	NA	NA
8160622	0.00491198	219	0.740438	-0.0465972	SMU1	FALSE	chr9	33076659	-	NA
8049784	0.00493726	220	0.740438	-0.0465705	PPP1R7	FALSE	chr2	241149657	+	NA
8036755	0.00501017	221	0.740438	0.280579	CLC	FALSE	chr19	39738028	-	NA
7959354	0.00501817	222	0.740438	-0.0833316	BCL7A	FALSE	chr12	122021885	+	NA
8097790	0.00502131	223	0.740438	0.122634	NA	FALSE	NA	NA	NA	NA
8124534	0.00503839	224	0.740438	0.154507	HIST1H4L	FALSE	chr6	27873510	-	NA
7893771	0.0050427	225	0.740438	-0.0991071	NA	FALSE	NA	NA	NA	NA
7896538	0.00504581	226	0.740438	0.197694	NA	FALSE	NA	NA	NA	NA
7895373	0.00508835	227	0.740438	-0.0513554	NA	FALSE	NA	NA	NA	NA
7896652	0.00509551	228	0.740438	-0.053155	NA	FALSE	NA	NA	NA	NA
8110362	0.00515823	229	0.740438	-0.0446353	GRK6	FALSE	chr5	177426842	+	rs4075958; rs4976646
8168215	0.00517932	230	0.740438	0.0383871	MED12	FALSE	NA	NA	NA	NA
8026806	0.0051975	231	0.740438	-0.0525567	COLGALT1	FALSE	chr19	17555593	+	NA
8004691	0.00524151	232	0.740438	0.0786317	TMEM88	FALSE	chr17	7855064	+	NA
7894520	0.00525012	233	0.740438	-0.0680972	NA	FALSE	NA	NA	NA	NA
7895526	0.00526133	234	0.740438	0.327949	NA	FALSE	NA	NA	NA	NA
8086555	0.00526962	235	0.740438	-0.0884556	LZTFL1	FALSE	chr3	45915724	-	NA
7927658	0.00528974	236	0.740438	-0.0620309	UBE2D1	FALSE	chr10	58334978	+	NA
8064739	0.00528986	237	0.740438	-0.0529316	C20orf27	FALSE	chr20	3767728	-	NA
8068671	0.00529842	238	0.740438	0.0838976	BACE2	FALSE	chr21	41167800	+	NA
8124446	0.00533417	239	0.740438	0.0660668	HIST1H2APS4	FALSE	NA	NA	NA	NA
7893325	0.00535809	240	0.740438	-0.120298	NA	FALSE	NA	NA	NA	NA
8034920	0.00535921	241	0.740438	0.0538027	ILVBL	FALSE	chr19	15125785	-	NA
8089261	0.00539213	242	0.741473	-0.0678936	CBLB	FALSE	chr3	105702201; 105869043; 105673993; 105682130; 105869043; 105869043; 105869422; 105869422; 105869552	-	rs2028597
7953603	0.00541123	243	0.741473	0.0783297	C1S	FALSE	chr12	7060675	+	NA
7972257	0.00546371	244	0.745595	-0.113008	RNA5SP35	FALSE	chr13	94025598	-	NA
7904751	0.00559979	245	0.74941	0.0617705	RBM8A	TRUE	chr1	145927536	-	NA
8116992	0.00562758	246	0.74941	-0.16316	NA	FALSE	NA	NA	NA	NA
7997940	0.00563685	247	0.74941	-0.132213	SNORD68	FALSE	chr16	89561433	+	NA
8163383	0.00565465	248	0.74941	-0.107823	SUSD1	FALSE	chr9	112175267	-	NA
8075483	0.00567757	249	0.74941	0.089554	PIK3IP1	FALSE	chr22	31292534	-	NA
8086698	0.00570077	250	0.74941	-0.0506968	CCDC12	FALSE	chr3	46981982	-	NA
8018860	0.00570077	251	0.74941	-0.0722132	BIRC5	FALSE	chr17	78214185; 78214197; 78214262; 78214263; 78214279; 78214316; 78214364; 78214384; 78214384; 78214384; 78216426	+	NA
7894946	0.0057038	252	0.74941	-0.27395	NA	FALSE	NA	NA	NA	NA
7893833	0.00573708	253	0.74941	0.0860475	NA	FALSE	NA	NA	NA	NA
8053562	0.00574578	254	0.74941	-0.0457751	CHMP3	FALSE	chr2	86563479	-	NA
7894488	0.00577517	255	0.74941	-0.162705	NA	FALSE	NA	NA	NA	NA
8124813	0.00580504	256	0.74941	0.0615007	MDC1	FALSE	chr6	30717889	-	NA
8178404	0.00580504	257	0.74941	0.0615007	MDC1	FALSE	chr6	30717889	-	NA
7946641	0.00583569	258	0.74941	0.0740112	GALNT18	FALSE	chr11	11622005	-	NA
7904482	0.00590265	259	0.74941	-0.0522722	SRGAP2	FALSE	chr1	206205908	+	NA
7933632	0.00591037	260	0.74941	-0.107291	NA	FALSE	NA	NA	NA	NA
8116983	0.00595008	261	0.74941	-0.10721	CD83	FALSE	chr6	14117255; 14117640	+	NA
7964577	0.00596042	262	0.74941	0.126025	PP12719	FALSE	NA	NA	NA	NA
8047659	0.00598257	263	0.74941	-0.0568607	ABI2	FALSE	chr2	203328238	+	NA
7933082	0.00606612	264	0.74941	0.0932942	NA	FALSE	NA	NA	NA	NA
8122146	0.00607157	265	0.74941	0.0953588	LINC00326	FALSE	chr6	133088079; 133088127	+	NA
8152764	0.00608059	266	0.74941	0.0695442	MTSS1	FALSE	chr8	124728273	-	NA
7908635	0.00608624	267	0.74941	-0.0685788	RPL34P6	FALSE	NA	NA	NA	NA
8013307	0.00608805	268	0.74941	0.0549467	FOXO3	FALSE	chr6	108560865	+	NA
8095751	0.00609043	269	0.74941	0.125681	PARM1	FALSE	chr4	74933115	+	NA
7939839	0.00610454	270	0.74941	-0.0793088	PTPRJ	FALSE	chr11	47980560	+	rs7120737
8135594	0.00612326	271	0.74941	0.104183	CAV1	FALSE	chr7	116525008	+	NA
7894003	0.00613055	272	0.74941	0.321236	NA	FALSE	NA	NA	NA	NA
8180292	0.00614436	273	0.74941	-0.0814567	NA	FALSE	NA	NA	NA	NA
8160260	0.00628981	274	0.76435	0.0733273	BNC2	FALSE	chr9	16870706	-	NA
8167957	0.00636537	275	0.770719	0.0767773	ZC3H12B	FALSE	NA	NA	NA	NA
8055978	0.006429	276	0.774887	-0.0499917	FAM133B	FALSE	chr7	92590393	-	NA
7935692	0.00644633	277	0.774887	0.0645512	ERLIN1	FALSE	chr10	100186029; 100186033; 100188334	-	NA
7912937	0.00648223	278	0.774889	0.0663833	PADI2	FALSE	chr1	17119435	-	NA
8025429	0.0064929	279	0.774889	-0.042676	HNRNPM	FALSE	chr19	8444766; 8444919; 8444957; 8444970; 8444976; 8444989; 8444991; 8444992; 8444993; 8461968; 8463496; 8466248; 8481468; 8482548; 8485861; 8486157; 8487301	+	NA
8022767	0.00660533	280	0.785492	-0.0435979	TRAPPC8	FALSE	chr18	31943100	-	NA
7896096	0.00665345	281	0.788068	0.267734	NA	FALSE	NA	NA	NA	NA
8180199	0.00667433	282	0.788068	-0.0861105	NA	FALSE	NA	NA	NA	NA
7996744	0.00674615	283	0.788325	-0.0455079	NFATC3	FALSE	chr16	68085657	+	NA
8078378	0.00675051	284	0.788325	-0.0959032	ZNF587P1	FALSE	NA	NA	NA	NA
8064382	0.00675366	285	0.788325	-0.0661522	NA	FALSE	NA	NA	NA	NA
8100391	0.00681379	286	0.788325	0.120973	RNU6-410P	FALSE	chr4	55032071	-	NA
8086498	0.00682362	287	0.788325	-0.0509226	KIAA1143	FALSE	chr3	44761662	-	NA
8037389	0.00682926	288	0.788325	0.045151	SMG9	FALSE	chr19	43754990	-	NA
8180289	0.00686202	289	0.788325	-0.0818252	NA	FALSE	NA	NA	NA	NA
7957161	0.00690643	290	0.788325	0.0811769	THAP2	FALSE	chr12	71663008	+	NA
7976488	0.00690674	291	0.788325	0.0706368	SERPINA5	FALSE	chr14	94581368	+	NA
7998174	0.00698067	292	0.788325	-0.0447356	LUC7L	FALSE	chr16	229450	-	NA
8166797	0.00699391	293	0.788325	-0.0886022	MID1IP1	FALSE	NA	NA	NA	NA
7893302	0.00706789	294	0.788325	0.183907	NA	FALSE	NA	NA	NA	NA
7961595	0.00710641	295	0.788325	0.08088	RERGL	FALSE	chr12	18090189	-	NA
7892982	0.00710848	296	0.788325	-0.183755	NA	FALSE	NA	NA	NA	NA
8142880	0.00715774	297	0.788325	-0.109597	MIR182	FALSE	chr7	129770490	-	NA
7989885	0.00719875	298	0.788325	-0.0637406	LOC646358	FALSE	NA	NA	NA	NA
8062964	0.00720121	299	0.788325	0.0538033	SYS1	FALSE	chr20	45361936	+	NA
8069174	0.00720987	300	0.788325	-0.061468	FAM207A	FALSE	chr21	44940009	+	NA
8027862	0.00722718	301	0.788325	0.117118	FFAR2	FALSE	chr19	35449714	+	NA
7892709	0.00728033	302	0.788325	-0.178636	NA	FALSE	NA	NA	NA	NA
8137874	0.00729786	303	0.788325	-0.0444952	CARD11	FALSE	chr7	3043945	-	rs1843938
8074878	0.00732701	304	0.788325	0.10181	NA	FALSE	NA	NA	NA	NA
7978542	0.00733523	305	0.788325	-0.0509422	KIAA1143	FALSE	chr3	44761662	-	NA
7968915	0.00736086	306	0.788325	-0.0559299	GTF2F2	FALSE	chr13	45120514	+	NA
8075164	0.007382	307	0.788325	-0.0717899	CHEK2	FALSE	chr22	28741838	-	NA
8154838	0.00738305	308	0.788325	0.0800844	TRBV21OR9-2	FALSE	chr9	33629120	+	NA
7895366	0.00740089	309	0.788325	0.312873	NA	FALSE	NA	NA	NA	NA
7895234	0.00745836	310	0.788325	-0.154387	NA	FALSE	NA	NA	NA	NA
8111974	0.00747215	311	0.788325	-0.0443671	PAIP1	FALSE	chr5	43557079	-	NA
8101324	0.00747392	312	0.788325	-0.0354004	HNRNPD	TRUE	chr4	82373956; 82358842; 82373986; 82359639; 82373983; 82357392; 82373991; 82373150; 82374144; 82374503; 82374161; 82373985	-	NA
7893135	0.00750026	313	0.788325	0.490303	NA	FALSE	NA	NA	NA	NA
7948397	0.00751304	314	0.788325	-0.173385	NA	FALSE	NA	NA	NA	NA
8117422	0.00752129	315	0.788325	0.0936366	HIST1H4F	FALSE	chr6	26240425	+	NA
7996160	0.00754121	316	0.788325	0.0632754	LOC388282	FALSE	NA	NA	NA	NA
7990054	0.00754862	317	0.788325	0.223267	UACA	FALSE	chr15	70702308	-	NA
7896523	0.00755085	318	0.788325	0.122846	NA	FALSE	NA	NA	NA	NA
8132501	0.00756512	319	0.788325	-0.106602	RNU7-35P	FALSE	chr7	43194420	+	NA
8089015	0.00757617	320	0.788325	0.0837958	PROS1	FALSE	chr3	93974066	-	NA
7998910	0.00760688	321	0.789054	0.0534262	CCDC64B	FALSE	chr16	3035541	-	NA
7932433	0.00766462	322	0.792033	-0.0741508	NSUN6	FALSE	chr10	18651622	-	NA
8089112	0.00768412	323	0.792033	0.0749485	FILIP1L	FALSE	chr3	100114513	-	NA
8152867	0.00771534	324	0.792033	0.0696356	ASAP1	FALSE	chr8	130443660	-	NA
8151572	0.00775092	325	0.792033	0.121794	SNX16	FALSE	chr8	81842286	-	NA
8083221	0.00781306	326	0.792033	-0.0424971	PBX2	FALSE	chr6	32190186	-	NA
8082673	0.0078469	327	0.792033	0.0975001	ACPP	FALSE	chr3	132317366	+	NA
7895034	0.00786696	328	0.792033	-0.0739162	NA	FALSE	NA	NA	NA	NA
8127484	0.0079407	329	0.792033	0.0531292	B3GAT2	FALSE	chr6	70957038	-	NA
8011214	0.00795318	330	0.792033	0.0591025	RTN4RL1	FALSE	chr17	2025345	-	NA
8080994	0.00801585	331	0.792033	0.13765	FRG2C	FALSE	chr3	75664329	+	NA
7977077	0.00801604	332	0.792033	-0.0445601	MARK3	FALSE	chr14	103385519	+	NA
8143555	0.00801669	333	0.792033	0.1184	OR9A2	FALSE	chr7	143027195	-	NA
8180290	0.00805366	334	0.792033	-0.0767872	NA	FALSE	NA	NA	NA	NA
8180291	0.00805366	335	0.792033	-0.0767872	NA	FALSE	NA	NA	NA	NA
7976669	0.00805931	336	0.792033	0.0525204	HHIPL1	FALSE	chr14	99645109	+	NA
8133331	0.00807715	337	0.792033	0.0441921	POM121C	FALSE	chr7	75486271	-	NA
8000948	0.00813013	338	0.792033	-0.0422872	BCL7C	FALSE	chr16	30894960	-	NA
7895890	0.00813891	339	0.792033	0.0709386	NA	FALSE	NA	NA	NA	NA
7894783	0.00815181	340	0.792033	-0.171765	NA	FALSE	NA	NA	NA	NA
8082408	0.00815397	341	0.792033	0.03629	SEC61A1	FALSE	chr3	128052368	+	NA
7925792	0.00817199	342	0.792033	-0.0485571	ZMYND11	FALSE	chr10	135483	+	NA
8039462	0.0081814	343	0.792033	0.0691009	COX6B2	FALSE	chr19	55354719	-	NA
8140869	0.0081827	344	0.792033	0.115196	LRRD1	FALSE	chr7	92165276	-	NA
8077513	0.00831201	345	0.799474	0.0528119	THUMPD3	FALSE	chr3	9371232	+	NA
7894462	0.00832439	346	0.799474	-0.126434	NA	FALSE	NA	NA	NA	NA
8029147	0.00833161	347	0.799474	-0.0349243	ARHGEF1	FALSE	chr19	41883160	+	NA
8115355	0.00839991	348	0.803713	0.0826586	GLRA1	FALSE	chr5	151924832; 151924836; 151924836; 151924842	-	NA
8026361	0.00847523	349	0.804838	-0.0688872	RN7SL337P	FALSE	chr19	14584094	+	NA
8144378	0.00848296	350	0.804838	0.0629186	AGPAT5	FALSE	chr8	6708356	+	NA
8151587	0.00848419	351	0.804838	0.0790187	C8orf59	FALSE	chr8	85215134; 85217702; 85219322; 85220339; 85220353; 85220367; 85220374; 85220374; 85220375; 85220384; 85220394; 85220414; 85220421	-	NA
8172717	0.008567	352	0.805521	-0.0906705	RNU6-504P	FALSE	NA	NA	NA	NA
8043981	0.00857482	353	0.805521	0.0738681	IL1R2	FALSE	chr2	102008514	+	NA
7892848	0.00863143	354	0.805521	0.0584672	NA	FALSE	NA	NA	NA	NA
7899289	0.00865239	355	0.805521	-0.0482099	WDTC1	FALSE	chr1	27234515	+	NA
7970810	0.00865799	356	0.805521	0.0664523	SLC7A1	FALSE	chr13	29595688	-	NA
7895608	0.00872364	357	0.805521	0.119858	NA	FALSE	NA	NA	NA	NA
7928444	0.00872428	358	0.805521	-0.0641189	VCL	FALSE	chr10	73998113	+	rs2688608
7945999	0.0087384	359	0.805521	0.0943883	OR51F1	FALSE	chr11	4769917	-	NA
7927267	0.00874903	360	0.805521	0.0495001	FAM35A	FALSE	chr10	87095195	+	NA
8149733	0.00875468	361	0.805521	0.0626542	TNFRSF10B	FALSE	chr8	23069179	-	NA
8072494	0.00877025	362	0.805521	-0.0418848	SFI1	FALSE	chr22	31496562	+	NA
8021442	0.00878169	363	0.805521	0.0573956	ZNF532	FALSE	chr18	58862599	+	rs7238078
7945158	0.00886878	364	0.809385	0.0992425	RNU6-874P	FALSE	chr11	129202965	+	NA
8110183	0.00889786	365	0.809385	0.0582299	CDHR2	FALSE	chr5	176542510	+	NA
7994889	0.00890281	366	0.809385	0.0436286	SRCAP	FALSE	chr16	30699140	+	NA
8077376	0.00893625	367	0.809385	0.0518071	ITPR1	FALSE	chr3	4493349	+	NA
7979437	0.0089727	368	0.809385	0.119393	L3HYPDH	FALSE	chr14	59484430	-	NA
8080773	0.00898706	369	0.809385	0.0572179	RPP14	FALSE	chr3	58306261	+	NA
8078286	0.00899837	370	0.809385	0.0733896	RARB	FALSE	chr3	25174331; 25428262; 25428310; 25428700; 25428715; 25428715; 25428715; 25458309	+	NA
7892919	0.00901828	371	0.809385	0.127716	NA	FALSE	NA	NA	NA	NA
8131965	0.00906607	372	0.811487	-0.068307	LOC101930332	FALSE	NA	NA	NA	NA
7900413	0.00912254	373	0.813112	0.0521613	ZMPSTE24	FALSE	chr1	40258106	+	NA
8133900	0.00913307	374	0.813112	-0.0899524	HMGN2P11	FALSE	NA	NA	NA	NA
8148474	0.00920756	375	0.814704	-0.0721527	RNA5SP278	FALSE	chr8	140940561	+	NA
8113035	0.00921751	376	0.814704	0.0987184	RNA5SP187	FALSE	chr5	88274376	-	NA
8025183	0.00922436	377	0.814704	0.0520833	MCOLN1	FALSE	chr19	7522625	+	NA
8123644	0.00936629	378	0.82318	0.0632672	TUBB2A	TRUE	chr6	3157526	-	NA
7948037	0.00938456	379	0.82318	-0.0773957	NA	FALSE	NA	NA	NA	NA
7919778	0.0093945	380	0.82318	-0.150227	NA	FALSE	NA	NA	NA	NA
7895201	0.00957589	381	0.828093	-0.259464	NA	FALSE	NA	NA	NA	NA
7920165	0.00958403	382	0.828093	-0.0633575	FLG	FALSE	chr1	152325203	-	NA
7992996	0.00960516	383	0.828093	-0.0750714	NA	FALSE	NA	NA	NA	NA
7894674	0.00961075	384	0.828093	0.0558657	NA	FALSE	NA	NA	NA	NA
8172395	0.00961309	385	0.828093	0.0981451	NA	FALSE	NA	NA	NA	NA
8048723	0.00970176	386	0.828093	-0.0749753	RNU6-619P	FALSE	chr2	222498290	+	NA
8085358	0.00971629	387	0.828093	0.097999	RN7SL147P	FALSE	chr3	11953085	-	NA
8166094	0.00971681	388	0.828093	0.0896238	RN7SKP20	FALSE	NA	NA	NA	NA
7894405	0.00978203	389	0.828093	0.128292	NA	FALSE	NA	NA	NA	NA
8079950	0.00978256	390	0.828093	-0.0318766	GNAI2	TRUE	chr3	50246893	+	NA
7893403	0.00979692	391	0.828093	0.0903484	NA	FALSE	NA	NA	NA	NA
7895404	0.00983345	392	0.828093	-0.12388	NA	FALSE	NA	NA	NA	NA
8048452	0.00984147	393	0.828093	0.0516264	WNT10A	FALSE	chr2	218880362	+	NA
7945260	0.00984446	394	0.828093	0.0978196	RNU6ATAC12P	FALSE	chr11	131385248	+	NA
8023646	0.00986679	395	0.828093	0.0574176	BCL2	FALSE	chr18	63320128	-	NA
7990027	0.00987522	396	0.828093	-0.0715099	ANP32A-IT1	FALSE	NA	NA	NA	NA
8098195	0.00987916	397	0.828093	0.0704096	MSMO1	FALSE	chr4	165327622	+	NA
8068460	0.00990763	398	0.828093	-0.0534459	MORC3	FALSE	chr21	36320188	+	NA
7896248	0.00994641	399	0.828093	-0.149179	NA	FALSE	NA	NA	NA	NA
8103802	0.00994796	400	0.828093	-0.0542419	SPATA4	FALSE	chr4	176194877	-	NA
7896281	0.0100149	401	0.829393	-0.123597	NA	FALSE	NA	NA	NA	NA
7892539	0.0100377	402	0.829393	0.140981	NA	FALSE	NA	NA	NA	NA
7896482	0.0100686	403	0.829393	-0.0629545	NA	FALSE	NA	NA	NA	NA
7974066	0.0101262	404	0.829393	-0.0432467	PNN	FALSE	chr14	39175212	+	NA
8083246	0.0101368	405	0.829393	0.0767374	CPB1	FALSE	chr3	148827800	+	NA
8054077	0.0101535	406	0.829393	-0.0488918	ACTR1B	FALSE	chr2	97664107	-	NA
8015739	0.0101548	407	0.829393	-0.113169	NA	FALSE	chr17	42940702	-	NA
8007312	0.0102198	408	0.829393	0.117231	TUBG2	FALSE	chr17	42659304	+	rs2293152; rs4796791; rs744166; rs9891119
8155096	0.0103211	409	0.829393	-0.0483439	CREB3	TRUE	chr9	35732334	+	NA
7893206	0.0103565	410	0.829393	-0.100307	NA	FALSE	NA	NA	NA	NA
8017262	0.0103744	411	0.829393	0.155047	BRIP1	FALSE	chr17	61863521	-	NA
8104731	0.0103985	412	0.829393	-0.104698	NA	FALSE	NA	NA	NA	NA
8076461	0.010425	413	0.829393	0.125126	RN7SKP80	FALSE	chr22	42565330	-	NA
7895517	0.0104529	414	0.829393	-0.0487048	NA	FALSE	NA	NA	NA	NA
8063524	0.0104717	415	0.829393	-0.0626321	LOC100130156	FALSE	NA	NA	NA	NA
8166619	0.0104938	416	0.829393	0.0551919	MAGEB1	FALSE	NA	NA	NA	NA
8126371	0.0105062	417	0.829393	0.0622901	CCND3	TRUE	chr6	41941519	-	NA
8171079	0.0105547	418	0.829393	-0.0486423	GTPBP6	TRUE	NA	NA	NA	NA
7990827	0.0106028	419	0.829393	-0.0711774	NA	FALSE	NA	NA	NA	NA
8045247	0.0106185	420	0.829393	-0.0529614	PLEKHB2	FALSE	chr2	131107555	+	NA
7956668	0.0106403	421	0.829393	0.0559071	LOC100996696	FALSE	NA	NA	NA	NA
7973221	0.0106633	422	0.829393	-0.0668911	TRAJ41	FALSE	chr14	22497656	+	NA
8155083	0.010679	423	0.829393	0.0558787	CA9	FALSE	chr9	35673855	+	NA
7942781	0.0107203	424	0.829393	0.0799258	NA	FALSE	NA	NA	NA	NA
8021866	0.0107276	425	0.829393	0.0491888	NFATC1	FALSE	chr18	79396224	+	NA
7946561	0.0107417	426	0.829393	-0.084009	RNU6ATAC33P	FALSE	chr11	10399317	-	NA
7979341	0.0107423	427	0.829393	-0.0710552	TBPL2	FALSE	chr14	55440616	-	NA
8030840	0.010756	428	0.829393	0.0966011	NA	FALSE	NA	NA	NA	NA
7894335	0.0107641	429	0.829393	0.173317	NA	FALSE	NA	NA	NA	NA
8152551	0.0107741	430	0.829393	0.0965778	RN7SKP153	FALSE	chr8	119712145	-	NA
8162880	0.0107843	431	0.829393	0.0540089	MRPL50	FALSE	chr9	101398614	-	NA
7983811	0.0108074	432	0.829393	0.0602746	PIGB	FALSE	chr15	55318959	+	NA
8059969	0.0108205	433	0.829393	-0.0484815	ILKAP	FALSE	chr2	238184096	-	NA
7924230	0.0108546	434	0.829393	-0.0484612	ABHD17A	FALSE	chr19	1885547	-	NA
7993624	0.0108813	435	0.829393	0.0797566	SYT17	FALSE	chr16	19168248	+	NA
8159371	0.0108959	436	0.829393	-0.081041	MIR126	FALSE	chr9	136670601	+	NA
7992145	0.0108969	437	0.829393	0.0447433	SSTR5	TRUE	chr16	1078780	+	rs2744148
7987180	0.0109101	438	0.829393	-0.0527709	KATNBL1	FALSE	chr15	34210079	-	NA
7905324	0.0109606	439	0.829762	0.0556745	C1orf56	FALSE	chr1	151047739	+	NA
7894540	0.0109648	440	0.829762	-0.0336945	NA	FALSE	NA	NA	NA	NA
7973156	0.0111029	441	0.830186	-0.073074	RNASE8	FALSE	chr14	21057821	+	NA
8148333	0.0111077	442	0.830186	-0.0406077	EFR3A	FALSE	chr8	131904087	+	NA
7896295	0.0111082	443	0.830186	0.113122	NA	FALSE	NA	NA	NA	NA
8142096	0.0111329	444	0.830186	0.0600222	ATXN7L1	FALSE	chr7	105876604	-	NA
8055263	0.0111338	445	0.830186	0.172451	NA	FALSE	NA	NA	NA	NA
8005661	0.0111385	446	0.830186	-0.0571441	SPECC1	FALSE	chr17	20087021	+	NA
7918593	0.0111657	447	0.830186	-0.0571255	RHOC	FALSE	chr1	112707434	-	NA
7986426	0.0111859	448	0.830186	0.0960584	RN7SL484P	FALSE	chr15	99791208	+	NA
7950933	0.0111988	449	0.830186	0.112988	NOX4	FALSE	chr11	89491328	-	NA
8006573	0.0112197	450	0.830186	-0.0405527	TAF15	FALSE	chr17	35809488	+	NA
7920249	0.0112645	451	0.831341	0.0817617	S100A7L2	FALSE	chr1	153439949	-	NA
8068395	0.0112929	452	0.831341	0.0897744	NA	FALSE	NA	NA	NA	NA
7893093	0.0113372	453	0.831341	0.300824	NA	FALSE	NA	NA	NA	NA
8007584	0.0114024	454	0.831341	0.0505763	ASB16	FALSE	chr17	44170705	+	NA
8144457	0.0114103	455	0.831341	-0.0805484	DEFB104B	FALSE	chr8	7475082	-	NA
8149192	0.0114103	456	0.831341	-0.0805484	DEFB104B	FALSE	chr8	7475082	-	NA
7948995	0.0114473	457	0.831341	0.0659787	ATL3	FALSE	chr11	63671909	-	NA
8075897	0.0114532	458	0.831341	0.0709606	C1QTNF6	FALSE	chr22	37188289	-	NA
7943998	0.0114837	459	0.831341	0.0562095	NNMT	FALSE	chr11	114295824	+	NA
8159239	0.011492	460	0.831341	0.0544889	C9orf62	FALSE	chr9	135343248	+	NA
8154223	0.01151	461	0.831341	-0.119079	NA	FALSE	NA	NA	NA	NA
7942168	0.01159	462	0.835309	0.0426556	FADD	FALSE	chr11	70203162	+	NA
8168691	0.011669	463	0.836644	-0.0531029	DIAPH2	FALSE	NA	NA	NA	NA
7968670	0.0116914	464	0.836644	0.0503962	UFM1	FALSE	chr13	38349848; 38349850; 38349880; 38349885; 38349995	+	NA
8059689	0.0117119	465	0.836644	-0.0333936	NCL	TRUE	chr2	231464594	-	NA
7944793	0.0117327	466	0.836644	0.0905539	OR8D4	FALSE	chr11	123906145	+	NA
7917283	0.0117388	467	0.836644	-0.103058	MCOLN2	FALSE	chr1	84996940	-	rs11587876; rs12087340
8035232	0.011772	468	0.836644	0.095348	NA	FALSE	NA	NA	NA	NA
8151764	0.0118084	469	0.836644	0.0715088	NA	FALSE	NA	NA	NA	NA
8123246	0.0118418	470	0.836644	-0.0659617	SLC22A3	FALSE	chr6	160348267	+	NA
8035398	0.0118789	471	0.836644	0.0498022	RAB3A	FALSE	chr19	18204074	-	rs11554159; rs874628
8006638	0.0118847	472	0.836644	0.0441968	GGNBP2	FALSE	chr17	36544887	+	NA
8044236	0.0118849	473	0.836644	-0.0697828	GCC2	FALSE	chr2	108448560	+	NA
8096301	0.0119403	474	0.838183	0.0611667	SPP1	FALSE	chr4	87975666	+	NA
7893736	0.0119644	475	0.838183	0.111897	NA	FALSE	NA	NA	NA	NA
8124394	0.0119903	476	0.838183	0.143383	HIST1H2BB	FALSE	chr6	26043657	-	NA
7896706	0.0120377	477	0.838183	0.124482	NA	FALSE	NA	NA	NA	NA
8131143	0.0120655	478	0.838183	-0.0513318	LFNG	FALSE	chr7	2519841	+	NA
7950669	0.0121028	479	0.838183	0.0540852	KCTD21	FALSE	chr11	78188822	-	NA
8122856	0.0121132	480	0.838183	0.094949	NA	FALSE	NA	NA	NA	NA
8005957	0.0121213	481	0.838183	0.0778407	SNORD4B	FALSE	chr17	28723681	+	NA
7960832	0.0121334	482	0.838183	-0.12058	CLEC4C	FALSE	chr12	7749473	-	NA
8066117	0.0121796	483	0.839633	-0.0839888	SAMHD1	FALSE	chr20	36951843	-	NA
8127130	0.0122471	484	0.842548	-0.120431	GCM1	FALSE	chr6	53148829	-	NA
8023059	0.0123932	485	0.850839	0.108609	RN7SKP26	FALSE	chr18	45989945	-	NA
8125470	0.0124381	486	0.852166	0.0748894	HLA-DOB	FALSE	chr6	32817048	-	NA
7894685	0.0125028	487	0.854839	-0.071915	NA	FALSE	NA	NA	NA	NA
8149324	0.0125792	488	0.858296	0.33509	FAM167A	FALSE	chr8	11466767	-	NA
8076137	0.012662	489	0.860692	-0.0355058	SUN2	FALSE	chr22	38755999	-	NA
7894800	0.012666	490	0.860692	0.0943235	NA	FALSE	NA	NA	NA	NA
8029914	0.0127614	491	0.864469	0.0746067	C5AR2	FALSE	chr19	47332146	+	NA
8165171	0.0127821	492	0.864469	0.0431434	INPP5E	FALSE	chr9	136439822	-	NA
8096808	0.0127995	493	0.864469	-0.0516352	CCDC109B	FALSE	chr4	109560204	+	NA
8163999	0.0128519	494	0.866256	0.0553009	ZBTB6	FALSE	chr9	122913330	-	NA
8140297	0.012904	495	0.868012	0.0340692	POM121C	FALSE	chr7	75486271	-	NA
8054790	0.0130347	496	0.871476	-0.0858562	NA	FALSE	NA	NA	NA	NA
7899600	0.0130363	497	0.871476	0.069632	RN7SKP91	FALSE	chr1	30843822	+	NA
8121461	0.0130372	498	0.871476	-0.0472619	CDC40	FALSE	chr6	110180420	+	NA
8163629	0.0131041	499	0.871476	0.17305	TNFSF8	FALSE	chr9	114930417	-	NA
7894325	0.0131043	500	0.871476	0.242196	NA	FALSE	NA	NA	NA	NA
7895976	0.0131291	501	0.871476	-0.065035	NA	FALSE	NA	NA	NA	NA
7937986	0.0131796	502	0.871476	0.0775591	OR52J3	FALSE	chr11	5046525	+	NA
8022412	0.0132028	503	0.871476	-0.0553175	MC2R	TRUE	chr18	13915540; 13915707	-	NA
8030148	0.0132326	504	0.871476	0.0541804	DHDH	FALSE	chr19	48933681	+	rs2303759; rs8107548
7895951	0.0132521	505	0.871476	0.167936	NA	FALSE	NA	NA	NA	NA
7892800	0.01327	506	0.871476	0.172711	NA	FALSE	NA	NA	NA	NA
8113491	0.0133518	507	0.871476	0.0584594	STARD4	FALSE	chr5	111512471; 111512510; 111512510; 111512512; 111512535; 111512535; 111512535; 111512535; 111512535; 111512535; 111512562; 111512590	-	NA
7904050	0.0133552	508	0.871476	-0.0471021	MOV10	FALSE	chr1	112674486	+	NA
8054354	0.0133627	509	0.871476	0.167719	NA	FALSE	NA	NA	NA	NA
7895151	0.0133642	510	0.871476	-0.308683	NA	FALSE	NA	NA	NA	NA
7893442	0.0134419	511	0.871476	0.107288	NA	FALSE	NA	NA	NA	NA
7970793	0.0134529	512	0.871476	0.0583939	SLC46A3	FALSE	chr13	28718841	-	NA
8027543	0.013482	513	0.871476	0.0532368	WDR88	FALSE	chr19	33132093	+	NA
8143363	0.0134864	514	0.871476	-0.10115	NA	FALSE	NA	NA	NA	NA
7896374	0.0135163	515	0.871476	0.197745	NA	FALSE	NA	NA	NA	NA
8095744	0.013542	516	0.871476	-0.146878	AREG	FALSE	chr4	74445133	+	NA
7965357	0.0135581	517	0.871476	0.0643645	POC1B-GALNT4	FALSE	chr12	89526198; 89526262	-	NA
7893104	0.013605	518	0.871476	-0.060443	NA	FALSE	NA	NA	NA	NA
8110604	0.0136235	519	0.871476	0.0643183	RNU1-17P	FALSE	chr5	180729585	+	NA
7896714	0.0136599	520	0.871476	-0.0988466	NA	FALSE	NA	NA	NA	NA
8166140	0.0136739	521	0.871476	0.112296	MOSPD2	FALSE	NA	NA	NA	NA
7894422	0.0136781	522	0.871476	-0.143182	NA	FALSE	NA	NA	NA	NA
8041900	0.0136884	523	0.871476	0.167089	RN7SKP224	FALSE	chr2	48217574	+	NA
8073259	0.0138202	524	0.878192	-0.0409055	SGSM3	FALSE	chr22	40370610	+	NA
7895824	0.0138621	525	0.878507	0.040992	NA	FALSE	NA	NA	NA	NA
8021961	0.013878	526	0.878507	0.112041	RN7SKP146	FALSE	chr18	586850	-	NA
8166784	0.0139072	527	0.878687	0.0769349	TSPAN7	FALSE	NA	NA	NA	NA
7894454	0.014054	528	0.879486	0.134067	NA	FALSE	NA	NA	NA	NA
7988077	0.0140629	529	0.879486	0.0620284	LCMT2	FALSE	chr15	43330605	-	NA
8076384	0.0140632	530	0.879486	-0.0644111	NA	FALSE	NA	NA	NA	NA
7946334	0.0141314	531	0.879486	-0.064367	NLRP10	FALSE	chr11	7963657	-	NA
7994874	0.0141373	532	0.879486	0.0443337	FBRS	FALSE	chr16	30664456	+	NA
8146649	0.0141468	533	0.879486	0.0760683	MTFR1	FALSE	chr8	65669872	+	NA
8081612	0.0141554	534	0.879486	0.0596488	ABHD10	FALSE	chr3	111979052	+	NA
8002143	0.0141784	535	0.879486	0.0443145	LCAT	FALSE	chr16	67944131	-	NA
7926168	0.0141802	536	0.879486	-0.0712433	RNU6-1095P	FALSE	chr10	11923180	+	NA
8041759	0.0142454	537	0.879486	-0.041263	SIX3	FALSE	chr2	44941897	+	NA
7953590	0.0142517	538	0.879486	0.111582	MIR200C	FALSE	chr12	6963671	+	NA
8050942	0.0142827	539	0.879486	-0.0423894	OTOF	FALSE	chr2	26558678	-	NA
7995237	0.0142928	540	0.879486	0.0686767	AHSP	FALSE	chr16	31527863	+	NA
8157976	0.0143124	541	0.879486	0.0489224	GARNL3	FALSE	chr9	127264512; 127225238; 127224470; 127224625; 127225354; 127264235; 127224538; 127245336; 127263661; 127224264; 127313352; 127265001; 127353517; 127342314; 127355307; 127387129; 127388411; 127361715; 127264922; 127355355; 127263661; 127264525	+	NA
8084627	0.014316	542	0.879486	0.0729699	C3orf65	FALSE	NA	NA	NA	NA
7983910	0.0143593	543	0.880377	0.170579	AQP9	FALSE	chr15	58138195	+	NA
8018935	0.0144103	544	0.880377	-0.100227	RNU6-638P	FALSE	chr17	78696797	-	NA
8086350	0.0144628	545	0.880377	-0.192482	RNU5B-2P	FALSE	chr3	40499003	-	NA
7946117	0.0144815	546	0.880377	-0.070457	OR56A4	FALSE	chr11	6003194	-	NA
8070257	0.0145146	547	0.880377	0.0653509	PIGP	FALSE	chr21	37072811	-	NA
7901993	0.0145345	548	0.880377	0.0764198	CACHD1	FALSE	chr1	64470791; 64505914; 64563676; 64664199	+	NA
8088776	0.014564	549	0.880377	-0.039099	FOXP1	FALSE	chr3	71583939	-	rs9828629
7895713	0.0145803	550	0.880377	-0.224077	NA	FALSE	NA	NA	NA	NA
7892831	0.0145859	551	0.880377	-0.0678269	NA	FALSE	NA	NA	NA	NA
8011713	0.014595	552	0.880377	-0.0742211	CXCL16	FALSE	chr17	4739922	-	NA
8136918	0.0146309	553	0.88095	0.0616572	ZYX	FALSE	chr7	143381079; 143381294; 143381359; 143381360; 143381574; 143381906; 143382027; 143382849; 143382999; 143387888	+	NA
8021228	0.014689	554	0.882854	0.0360137	SMAD4	FALSE	chr18	51030212	+	NA
8003228	0.0148455	555	0.883363	0.0842255	NA	FALSE	NA	NA	NA	NA
7923233	0.0149175	556	0.883363	0.0486166	KIF21B	FALSE	chr1	201023700	-	rs12122721; rs55838263; rs7522462
7894719	0.0149717	557	0.883363	0.110729	NA	FALSE	NA	NA	NA	NA
7930274	0.0149755	558	0.883363	-0.105941	NA	FALSE	NA	NA	NA	NA
8019238	0.0149781	559	0.883363	-0.0409644	OXLD1	FALSE	chr17	81666588	-	NA
7895270	0.0150057	560	0.883363	0.287397	NA	FALSE	NA	NA	NA	NA
8094938	0.0150286	561	0.883363	0.0681515	NIPAL1	FALSE	chr4	48016773	+	NA
7993371	0.0150404	562	0.883363	0.054013	NOMO2	FALSE	chr16	18562112	-	NA
7993511	0.0150404	563	0.883363	0.054013	NOMO2	FALSE	chr16	18562112	-	NA
7999791	0.0150404	564	0.883363	0.054013	NOMO2	FALSE	chr16	18562112	-	NA
7971653	0.0150831	565	0.883363	-0.0953478	MIR15A	FALSE	chr13	50049202	-	NA
8110706	0.0151019	566	0.883363	0.0633206	NA	FALSE	NA	NA	NA	NA
8115344	0.0151476	567	0.883363	-0.0840701	RN7SKP232	FALSE	chr5	151704578	-	NA
7893356	0.0151493	568	0.883363	-0.0577855	NA	FALSE	NA	NA	NA	NA
7925870	0.0151783	569	0.883363	-0.0738065	LINC00200	FALSE	chr10	1159767	+	NA
7957275	0.0151857	570	0.883363	0.0945695	RN7SKP172	FALSE	chr12	76315750	+	NA
7896372	0.015203	571	0.883363	-0.141133	NA	FALSE	NA	NA	NA	NA
8131944	0.0152448	572	0.883363	0.091695	NFE2L3	FALSE	chr7	26184059	+	NA
8039413	0.0152474	573	0.883363	-0.0345727	PPP6R1	FALSE	chr19	55247372	-	NA
7896456	0.0152678	574	0.883363	0.0530251	NA	FALSE	NA	NA	NA	NA
7949971	0.0152709	575	0.883363	0.193903	CPT1A	FALSE	chr11	68841931	-	NA
7983274	0.0153008	576	0.883363	-0.0403078	PDIA3	FALSE	chr15	43746391	+	NA
8033414	0.0153454	577	0.883363	-0.046172	PCP2	FALSE	chr19	7632971	-	NA
7998129	0.0154239	578	0.883363	0.0631149	POLR3K	FALSE	chr16	53628	-	NA
8044149	0.0154251	579	0.883363	-0.0992697	PLGLB2	FALSE	chr2	87021852	-	NA
7919314	0.0154344	580	0.883363	0.119815	FMO5	FALSE	chr1	147225638	-	NA
8020691	0.0154392	581	0.883363	-0.0992567	PSMA8	FALSE	chr18	26133851	+	NA
7901592	0.0154598	582	0.883363	-0.0510402	TCEANC2	FALSE	chr1	54054133	+	NA
8162938	0.0155088	583	0.883363	0.0720768	OR13C9	FALSE	chr9	104618204	-	NA
7984624	0.0155218	584	0.883363	-0.0635057	NA	FALSE	NA	NA	NA	NA
7931405	0.01556	585	0.883363	-0.0456594	PPP2R2D	FALSE	chr10	131939775; 131940606; 131940158; 131901030; 131901265; 131901290; 131900643	+	NA
7993821	0.0155663	586	0.883363	-0.0634793	CRYM-AS1	FALSE	chr16	21300848; 21300880; 21303246	+	NA
7948109	0.015662	587	0.883363	-0.0702361	OR5I1	FALSE	chr11	55936400	-	NA
7893548	0.015663	588	0.883363	0.1931	NA	FALSE	NA	NA	NA	NA
8023708	0.0156672	589	0.883363	0.109939	NA	FALSE	NA	NA	NA	NA
8064384	0.0156693	590	0.883363	0.0482518	SCRT2	FALSE	chr20	676179	-	NA
7893233	0.0156791	591	0.883363	0.168183	NA	FALSE	NA	NA	NA	NA
8133770	0.0157194	592	0.884136	0.109881	CCDC146	FALSE	chr7	77122616	+	NA
8065596	0.0157606	593	0.884961	0.0546461	PDRG1	FALSE	chr20	31952092	-	NA
7913547	0.0158483	594	0.887117	0.0477086	WNT4	FALSE	chr1	22142966	-	NA
8038899	0.0158523	595	0.887117	0.104573	FPR1	FALSE	chr19	51751893	-	NA
8138997	0.0160806	596	0.894248	-0.0631784	TBX20	FALSE	chr7	35254147	-	NA
8018439	0.0160821	597	0.894248	-0.0590061	H3F3B	FALSE	chr17	75779779	-	NA
8109424	0.0160881	598	0.894248	-0.116003	RN7SL655P	FALSE	chr5	154349427	+	NA
8167625	0.0160979	599	0.894248	0.0692124	CCNB3	FALSE	NA	NA	NA	NA
7990636	0.016114	600	0.894248	-0.0833244	LINC00597	FALSE	NA	NA	NA	NA
8135114	0.0161586	601	0.895227	-0.0405094	CUX1	FALSE	chr7	101816010	+	NA
7893220	0.0162832	602	0.897714	0.071101	NA	FALSE	NA	NA	NA	NA
8111892	0.0163019	603	0.897714	-0.0404561	OXCT1	FALSE	chr5	41870519	-	NA
8101203	0.0163771	604	0.897714	0.0811456	RNU6-1000P	FALSE	chr4	76356715	-	NA
8103508	0.0163782	605	0.897714	0.0714635	2001-03-01	FALSE	chr4	164384050	-	NA
8162352	0.0164144	606	0.897714	-0.0441545	NOL8	FALSE	chr9	92325594	-	NA
8143367	0.0164179	607	0.897714	-0.0505898	SLC37A3	FALSE	chr7	140398502	-	NA
8054281	0.0164639	608	0.897714	-0.0514814	LONRF2	FALSE	chr2	100322733	-	NA
7892765	0.0164743	609	0.897714	-0.0602224	NA	FALSE	NA	NA	NA	NA
8067203	0.0165025	610	0.897714	-0.0550338	LOC100291105	FALSE	NA	NA	NA	NA
8100994	0.0165484	611	0.897714	-0.0791313	CXCL2	FALSE	chr4	74099293	-	NA
8097282	0.0165502	612	0.897714	0.10898	SPRY1	FALSE	chr4	123396794	+	NA
8167654	0.0165573	613	0.897714	0.0523622	GSPT2	FALSE	NA	NA	NA	NA
8117543	0.0165699	614	0.897714	-0.105914	HIST1H2AH	FALSE	chr6	27147128	+	NA
7894331	0.0165824	615	0.897714	0.074866	NA	FALSE	NA	NA	NA	NA
8090464	0.016617	616	0.897714	0.0515644	DNAJB8	FALSE	chr3	128467248	-	NA
7905576	0.0166348	617	0.897714	-0.0829385	S100A7A	FALSE	chr1	153416523	+	NA
7895102	0.0167273	618	0.901246	0.232647	NA	FALSE	NA	NA	NA	NA
7943293	0.0167953	619	0.901567	-0.0586282	ENDOD1	FALSE	chr11	95089809	+	NA
8012518	0.0168343	620	0.901567	0.0711533	NA	FALSE	NA	NA	NA	NA
7912303	0.0168392	621	0.901567	-0.0451268	DFFA	FALSE	chr1	10472526	-	rs10492972
7946569	0.0168416	622	0.901567	-0.0586042	RNF141	FALSE	chr11	10541217	-	NA
8133854	0.0169056	623	0.903204	0.161501	NA	FALSE	NA	NA	NA	NA
7895316	0.0169446	624	0.903204	-0.0979339	NA	FALSE	NA	NA	NA	NA
7981377	0.0170229	625	0.903204	-0.0439142	ANKRD9	FALSE	chr14	102509791	-	rs12148050
8034512	0.0170445	626	0.903204	-0.160491	SNORD41	FALSE	chr19	12706518	-	NA
8138581	0.0170452	627	0.903204	-0.0396654	TRA2A	FALSE	chr7	23532041	-	NA
8069553	0.0170638	628	0.903204	-0.0584896	NRIP1	FALSE	chr21	15064805	-	NA
7974483	0.0170699	629	0.903204	-0.0401775	KTN1	FALSE	chr14	55559071; 55580253; 55580209; 55644285; 55651889; 55641748; 55656099; 55656101; 55661248; 55671861; 55580323; 55611976; 55675049; 55679662; 55644274; 55661273; 55663342; 55580314; 55580316; 55580321; 55601791; 55671314; 55611976; 55667650; 55672929	+	NA
7912956	0.0171149	630	0.903204	-0.0381759	RCC2	FALSE	chr1	17438561	-	NA
8026868	0.0171163	631	0.903204	-0.015045	RPL18A	FALSE	chr19	17859875	+	rs11554159; rs874628
8093037	0.0172398	632	0.90426	-0.103823	RNU2-11P	FALSE	chr3	195928775	-	NA
7979862	0.0172918	633	0.90426	0.105685	NA	FALSE	NA	NA	NA	NA
7955865	0.0173201	634	0.90426	0.0635747	HOXC9	FALSE	chr12	54000118	+	NA
7956105	0.017355	635	0.90426	0.0528208	IKZF4	FALSE	chr12	56021079	+	NA
8126086	0.0174068	636	0.90426	0.0619264	TMEM217	FALSE	chr6	37257623	-	NA
7914334	0.0174139	637	0.90426	0.0665934	SNRNP40	FALSE	chr1	31296770; 31261822; 31282483; 31269666; 31261077; 31289419; 31296782	-	NA
8041236	0.0174434	638	0.90426	-0.0395268	SPAST	FALSE	chr2	32063610	+	NA
8082504	0.0175604	639	0.90426	-0.0660093	HMCES	FALSE	chr3	129278973	+	NA
7893292	0.0175686	640	0.90426	-0.155614	NA	FALSE	NA	NA	NA	NA
8047059	0.0175838	641	0.90426	-0.0493089	HNRNPC	FALSE	chr14	21269425	-	NA
7948105	0.0176261	642	0.90426	-0.068463	OR4C11	FALSE	chr11	55604398	-	NA
7986605	0.0176275	643	0.90426	0.0895988	POTEC	FALSE	chr18	14543146	-	NA
8147228	0.0176337	644	0.90426	-0.0410874	DECR1	FALSE	chr8	90001404	+	NA
8054664	0.0176617	645	0.90426	-0.0492759	ZC3H8	FALSE	chr2	112255111	-	rs17174870
7893343	0.0176697	646	0.90426	-0.0581835	NA	FALSE	NA	NA	NA	NA
8052143	0.0176968	647	0.90426	-0.0500229	GPR75	FALSE	chr2	53859989	-	NA
8102171	0.0177393	648	0.90426	-0.0451836	TBCK	FALSE	chr4	106316266	-	NA
8067351	0.0177419	649	0.90426	0.039466	PPP1R3D	FALSE	chr20	59940297	-	NA
8049552	0.0178773	650	0.90426	-0.0708044	RBM44	FALSE	chr2	237798388	+	NA
8140317	0.0178983	651	0.90426	0.1076	NA	FALSE	NA	NA	NA	NA
8065134	0.0179009	652	0.90426	0.107598	RN7SKP69	FALSE	chr20	17576510	-	NA
8165458	0.0179034	653	0.90426	-0.0621753	TMEM210	FALSE	chr9	137172409	-	NA
8157804	0.0179148	654	0.90426	-0.0398833	OLFML2A	FALSE	chr9	124800873	+	NA
7995994	0.0179206	655	0.90426	0.0467954	RSPRY1	FALSE	chr16	57186290	+	NA
8175947	0.0179903	656	0.90426	0.0409519	HCFC1	FALSE	NA	NA	NA	NA
8132992	0.0180101	657	0.90426	-0.0657582	NA	FALSE	NA	NA	NA	NA
8066598	0.0180174	658	0.90426	-0.0446667	ACOT8	FALSE	chr20	45857406	-	rs2425752; rs4810485; rs6074022
7896401	0.0181159	659	0.90426	0.159645	NA	FALSE	NA	NA	NA	NA
7970262	0.0181616	660	0.90426	-0.0392837	CUL4A	FALSE	chr13	113209543	+	NA
8048227	0.0182538	661	0.90426	0.163992	CXCR2	FALSE	chr2	218125704; 218130849; 218126018; 218125680; 218129286; 218125288; 218126003	+	NA
8134777	0.0182603	662	0.90426	0.0814998	PVRIG	FALSE	chr7	100219235	+	NA
8067844	0.0182927	663	0.90426	0.0890587	POTEC	FALSE	chr18	14543146	-	NA
8045285	0.0183093	664	0.90426	0.0759044	NA	FALSE	NA	NA	NA	NA
8008912	0.0183156	665	0.90426	0.102157	NA	FALSE	NA	NA	NA	NA
8153269	0.0183618	666	0.90426	0.0556437	GPR20	FALSE	chr8	141367267	-	NA
7945182	0.018389	667	0.90426	-0.0497307	APLP2	TRUE	chr11	130069920	+	NA
7952406	0.0184054	668	0.90426	0.066001	OR8B12	FALSE	chr11	124543679	-	NA
8140840	0.0184786	669	0.90426	0.15911	STEAP4	FALSE	chr7	88306891; 88306888; 88306880	-	NA
8052654	0.0184853	670	0.90426	0.0729293	PELI1	FALSE	chr2	64144362	-	NA
7931975	0.0185476	671	0.90426	0.106969	RNU6-535P	FALSE	chr10	7486809	-	NA
8175802	0.01855	672	0.90426	0.0453062	TREX2	FALSE	NA	NA	NA	NA
7892857	0.0186216	673	0.90426	-0.0448485	NA	FALSE	NA	NA	NA	NA
8080956	0.0186379	674	0.90426	0.0658662	RNU6-281P	FALSE	chr3	70808349	+	NA
8094240	0.018642	675	0.90426	-0.0924426	CD38	FALSE	chr4	15778277	+	NA
7969879	0.0186719	676	0.90426	0.0734476	NA	FALSE	NA	NA	NA	NA
7979925	0.0186732	677	0.90426	-0.137059	ADAM20P1	FALSE	chr14	70483756	-	NA
7939368	0.0186923	678	0.90426	-0.0391093	TRIM44	FALSE	chr11	35662804	+	NA
8077366	0.018705	679	0.90426	0.228206	LRRN1	FALSE	chr3	3799436	+	NA
8093829	0.0187231	680	0.90426	0.052181	ZBTB49	FALSE	chr4	4290250	+	NA
7896339	0.0187661	681	0.90426	0.0468957	NA	FALSE	NA	NA	NA	NA
7952126	0.0188287	682	0.90426	-0.0714875	RPL23AP64	FALSE	NA	NA	NA	NA
8148642	0.018838	683	0.90426	-0.033484	GSDMD	FALSE	chr8	143553206	+	NA
8092534	0.0188427	684	0.90426	0.0554107	TMEM41A	FALSE	chr3	185499057	-	NA
7895529	0.0188447	685	0.90426	-0.136875	NA	FALSE	NA	NA	NA	NA
7892738	0.0188652	686	0.90426	-0.0922768	NA	FALSE	NA	NA	NA	NA
8136557	0.0188716	687	0.90426	0.106661	TBXAS1	FALSE	chr7	139777050; 139777146; 139778135; 139778247; 139778247; 139778247; 139778253; 139778255; 139778337; 139778399; 139829152; 139829223; 139829246; 139829248; 139829253; 139829253; 139829263; 139829270; 139829272; 139829301; 139953434; 139957580	+	NA
8155248	0.0188916	688	0.90426	-0.216385	NA	FALSE	NA	NA	NA	NA
7916984	0.0190168	689	0.90426	-0.071379	MIR186	FALSE	chr1	71067716	-	NA
7912808	0.0190268	690	0.90426	-0.0390016	NBPF8	FALSE	chr1	149082311	-	NA
7894654	0.0190992	691	0.90426	0.265784	NA	FALSE	NA	NA	NA	NA
8081758	0.0191164	692	0.90426	0.158193	GRAMD1C	FALSE	chr3	113897469	+	NA
8040576	0.0191269	693	0.90426	-0.0812249	RNU6-936P	FALSE	chr2	24676308	+	rs4665719
8142098	0.0191713	694	0.90426	0.0655625	ATXN7L1	FALSE	chr7	105876604	-	NA
7954279	0.0191905	695	0.90426	-0.0375096	AEBP2	FALSE	chr12	19439698	+	NA
7896695	0.0192335	696	0.90426	-0.081156	NA	FALSE	NA	NA	NA	NA
8043945	0.0192632	697	0.90426	-0.0374875	MAP4K4	FALSE	chr2	101698080	+	NA
7895966	0.0192695	698	0.90426	0.181401	NA	FALSE	NA	NA	NA	NA
8035838	0.0192947	699	0.90426	-0.0614676	ZNF724P	FALSE	chr19	23250360; 23250388; 23250390	-	NA
8021342	0.0193327	700	0.90426	0.0723941	NA	FALSE	NA	NA	NA	NA
8112918	0.0193581	701	0.90426	0.0654579	NA	FALSE	NA	NA	NA	NA
8025076	0.0194034	702	0.90426	-0.0374449	VAV1	FALSE	chr19	6772713	+	rs1077667
8041168	0.0194146	703	0.90426	-0.112853	SNORD53	FALSE	chr2	28927066	+	NA
8135250	0.0194164	704	0.90426	0.0514782	PSMC2	FALSE	chr7	103347711	+	NA
7979414	0.0194321	705	0.90426	-0.136255	NA	FALSE	NA	NA	NA	NA
8053417	0.0194384	706	0.90426	-0.0772422	CAPG	FALSE	chr2	85410370	-	NA
8147221	0.0194418	707	0.90426	0.0466263	OSGIN2	FALSE	chr8	89902533	+	NA
7908968	0.0195338	708	0.90426	0.0880962	LAX1	FALSE	chr1	203765175; 203765176; 203769637	+	NA
8021418	0.0195957	709	0.90426	-0.0388222	MALT1	FALSE	chr18	58671385	+	rs7238078
8144619	0.019623	710	0.90426	0.0588533	RN7SL293P	FALSE	chr8	11379394	+	NA
8102743	0.0196748	711	0.90426	0.0670087	NA	FALSE	NA	NA	NA	NA
8070665	0.0196827	712	0.90426	-0.0710018	SIK1	FALSE	chr21	43427128	-	NA
8120860	0.0196887	713	0.90426	-0.0521447	BCKDHB	FALSE	chr6	80106646	+	NA
8013633	0.0197098	714	0.90426	-0.0444537	UNC119	FALSE	chr17	28552668	-	NA
8071642	0.0197287	715	0.90426	0.157338	IGLV6-57	FALSE	chr22	22195712	+	rs2283792
7983254	0.0197576	716	0.90426	0.0804457	NA	FALSE	NA	NA	NA	NA
7983272	0.0197576	717	0.90426	0.0804457	NA	FALSE	NA	NA	NA	NA
7969626	0.0197621	718	0.90426	0.0834776	GPR180	FALSE	chr13	94601902	+	NA
7896375	0.0197673	719	0.90426	-0.0429154	NA	FALSE	NA	NA	NA	NA
8151871	0.019846	720	0.90426	0.0803856	CCNE2	FALSE	chr8	94895254	-	NA
8009502	0.0198642	721	0.90426	0.06061	KCNJ2	FALSE	chr17	70169534	+	NA
7896328	0.0198897	722	0.90426	0.263855	NA	FALSE	NA	NA	NA	NA
8095566	0.0199267	723	0.90426	-0.0525299	MOB1B	FALSE	chr4	70902377	+	NA
7904574	0.0199391	724	0.90426	-0.0372846	NBPF8	FALSE	chr1	149082311	-	NA
7893561	0.0199441	725	0.90426	0.0605696	NA	FALSE	NA	NA	NA	NA
7894143	0.0199709	726	0.90426	-0.236221	NA	FALSE	NA	NA	NA	NA
8002247	0.0199889	727	0.90426	0.0877569	RNU4-30P	FALSE	chr16	68329529	-	rs1886700
7995055	0.0200356	728	0.90426	-0.0402811	KAT8	FALSE	chr16	31117663	+	NA
8137464	0.0200873	729	0.90426	-0.185243	PSPH	FALSE	chr7	56051604	-	NA
8112731	0.0201291	730	0.90426	0.0761426	F2RL2	FALSE	chr5	76623413	-	NA
7903972	0.0201434	731	0.90426	0.0747161	ATP5F1	FALSE	chr1	111448935	+	NA
8114843	0.0201501	732	0.90426	0.126405	RN7SKP246	FALSE	chr5	144535670	-	NA
8142079	0.0201832	733	0.90426	0.114642	EFCAB10	FALSE	chr7	105581690	-	NA
8036436	0.0202167	734	0.90426	0.0649883	ZNF607	FALSE	chr19	37719188	-	NA
8089519	0.0202396	735	0.90426	0.0585523	BTLA	FALSE	chr3	112499358	-	NA
7969202	0.0202774	736	0.90426	0.100431	RN7SL320P	FALSE	chr13	51469752	+	NA
7978558	0.0202961	737	0.90426	-0.0518965	EAPP	FALSE	chr14	34539710	-	NA
8165498	0.020305	738	0.90426	-0.0523748	FAM166A	FALSE	chr9	137247770	-	NA
8048940	0.0203098	739	0.90426	-0.0371759	SP100	FALSE	chr2	230416246	+	rs10201872; rs9989735
8108166	0.0203987	740	0.90426	0.0498848	TXNDC15	FALSE	chr5	134873802	+	NA
8063115	0.0204622	741	0.90426	0.0618662	MMP9	FALSE	chr20	46008907	+	rs2425752; rs4810485; rs6074022
8096899	0.0204647	742	0.90426	-0.0441907	C4orf32	FALSE	chr4	112145396	+	NA
8073242	0.0204742	743	0.90426	-0.0385538	ADSL	FALSE	chr22	40346499	+	NA
8154914	0.0204867	744	0.90426	-0.0740378	RN7SKP24	FALSE	chr9	34478621	+	NA
7909142	0.0205287	745	0.90426	-0.0644444	NUCKS1	FALSE	chr1	205750276; 205719726	-	NA
8034297	0.0205308	746	0.90426	0.0692222	RN7SL833P	FALSE	chr19	11516330	-	NA
8147040	0.0205329	747	0.90426	-0.0481378	ZBTB10	FALSE	chr8	80486212	+	NA
7932160	0.0205573	748	0.90426	-0.0437574	FAM107B	FALSE	chr10	14522225; 14532710; 14548640; 14548670; 14553454; 14554229; 14555885; 14556171; 14556180; 14556414; 14571999; 14572030; 14572032; 14572096; 14572113; 14572128; 14572155; 14572155; 14572189; 14572189; 14572314; 14572339; 14604270; 14604295; 14604389; 14604418; 14612552; 14774705; 14774897	-	NA
8170507	0.0205574	749	0.90426	0.0688674	PRRG3	FALSE	NA	NA	NA	NA
8061958	0.0205659	750	0.90426	-0.0385263	CHMP4B	FALSE	chr20	33811303	+	NA
8009241	0.0205733	751	0.90426	-0.135095	SNORD104	FALSE	chr17	64146082	+	NA
7916130	0.020586	752	0.90426	0.0546079	KTI12	FALSE	chr1	52033816	-	NA
8109752	0.0205964	753	0.90426	-0.0724932	TENM2	FALSE	chr5	167284798	+	NA
7944991	0.0205983	754	0.90426	0.0406075	STT3A	FALSE	chr11	125591711; 125592794; 125592818; 125592835; 125592866; 125593168; 125594862; 125602756; 125603376; 125606209; 125606412; 125608147; 125609418; 125610708; 125613683; 125618517	+	NA
8148047	0.0206153	755	0.90426	0.0873007	NA	FALSE	NA	NA	NA	NA
7972297	0.0206636	756	0.90426	0.072221	ABCC4	FALSE	chr13	95301429	-	NA
7951752	0.0206903	757	0.90426	0.0445026	USP28	FALSE	chr11	113875570	-	NA
7895177	0.020739	758	0.90426	-0.0521999	NA	FALSE	NA	NA	NA	NA
8101118	0.020781	759	0.90426	0.072152	CXCL9	FALSE	chr4	76007488	-	NA
8097903	0.0207907	760	0.90426	0.100004	TLR2	FALSE	chr4	153701499	+	NA
8113616	0.0207922	761	0.90426	0.041715	FEM1C	FALSE	chr5	115544894	-	NA
8148302	0.0208095	762	0.90426	-0.0908999	RN7SL329P	FALSE	chr8	125270603	+	NA
7892548	0.0208439	763	0.90426	0.0646562	NA	FALSE	NA	NA	NA	NA
8170520	0.0208829	764	0.90426	0.0646359	CNGA2	FALSE	NA	NA	NA	NA
7975453	0.0209059	765	0.90426	-0.138078	SNORD56B	FALSE	chr14	71398336	+	NA
8159642	0.0209187	766	0.90426	0.0512355	TUBB4B	FALSE	chr9	137241212	+	NA
7928306	0.0209275	767	0.90426	0.0998922	NA	FALSE	NA	NA	NA	NA
8074196	0.0209325	768	0.90426	-0.052123	CCT8L2	FALSE	chr22	16592810	-	NA
8097867	0.0209408	769	0.90426	0.034049	KIAA0922	FALSE	chr4	153466348	+	NA
8001507	0.0211076	770	0.90426	0.0719618	BBS2	FALSE	chr16	56520283	-	NA
8022009	0.0211772	771	0.90426	0.0486991	METTL4	FALSE	chr18	2571486	-	NA
7958784	0.0211948	772	0.90426	-0.0736439	ALDH2	FALSE	chr12	111766921	+	NA
8079422	0.0212173	773	0.90426	0.105094	TDGF1	FALSE	chr3	46574554	+	NA
8091188	0.0212268	774	0.90426	-0.0906189	RNU1-100P	FALSE	chr3	142420369	-	NA
8024100	0.0212298	775	0.90426	0.0383281	GRIN3B	FALSE	chr19	1000418	+	NA
8142468	0.0212862	776	0.90426	-0.043914	TPM3	FALSE	chr1	154183130	-	NA
8084266	0.0213492	777	0.90426	-0.061999	HTR3D	FALSE	chr3	184031741	+	NA
7929612	0.0214555	778	0.90426	0.0643408	NA	FALSE	NA	NA	NA	NA
8108015	0.021528	779	0.90426	0.0442079	HSPA4	FALSE	chr5	133051961	+	NA
7982927	0.0215469	780	0.90426	0.0501651	ITPKA	FALSE	chr15	41493874	+	NA
8066198	0.0215932	781	0.90426	0.0642709	RN7SKP185	FALSE	chr20	37975481	-	NA
8050805	0.021617	782	0.90426	-0.0699654	POMC	FALSE	chr2	25168604	-	rs4665719
7925442	0.0216281	783	0.90426	0.0716642	NA	FALSE	NA	NA	NA	NA
7896034	0.0216492	784	0.90426	0.0892276	NA	FALSE	NA	NA	NA	NA
8124022	0.0216657	785	0.90426	-0.0397805	DTNBP1	FALSE	chr6	15663042; 15586015; 15663007; 15663058; 15663058; 15663030; 15663058; 15548362; 15662975; 15662920; 15533547; 15663020	-	NA
8013616	0.0217367	786	0.90426	0.0518731	SLC46A1	FALSE	chr17	28406201	-	NA
7971218	0.0217989	787	0.90426	0.067779	KBTBD7	FALSE	chr13	41194566	-	NA
8084717	0.0218065	788	0.90426	0.0337494	ST6GAL1	FALSE	chr3	187021855	+	NA
7913415	0.0218286	789	0.90426	-0.0381589	USP48	FALSE	chr1	21783606	-	NA
7945349	0.0218353	790	0.90426	0.0596542	BET1L	FALSE	chr11	207428	-	NA
8178244	0.0218402	791	0.90426	-0.0367445	RING1	TRUE	chr6	33208494	+	NA
7924405	0.0218618	792	0.90426	0.0396626	RAB3GAP2	FALSE	chr1	220272454	-	NA
8027824	0.0219129	793	0.90426	-0.0480269	MAG	FALSE	chr19	35292160	+	NA
8107920	0.0219154	794	0.90426	0.0611532	SLC22A5	FALSE	chr5	132369751	+	NA
8116662	0.021919	795	0.90426	-0.0941829	NA	FALSE	NA	NA	NA	NA
8135835	0.0219199	796	0.90426	0.0708795	SPAM1	FALSE	chr7	123925236; 123925302; 123925313; 123925854; 123947699; 123949865	+	NA
8044764	0.0219341	797	0.90426	0.0596082	RN7SL111P	FALSE	chr2	118016384	+	NA
8037835	0.0219353	798	0.90426	0.0556073	SLC1A5	FALSE	chr19	46787342	-	NA
7967331	0.021945	799	0.90426	0.0456954	VPS37B	FALSE	chr12	122896444	-	rs1790100; rs7132277; rs949143
8022007	0.02199	800	0.90426	0.0708407	RN7SKP72	FALSE	chr18	1324085	-	NA
8163599	0.0219951	801	0.90426	0.0499904	DFNB31	FALSE	chr9	114503173	-	NA
7893857	0.0220199	802	0.90426	-0.081698	NA	FALSE	NA	NA	NA	NA
8157947	0.0220329	803	0.90426	0.0507887	ZBTB34	FALSE	chr9	126879347	+	NA
7949898	0.0220525	804	0.90426	-0.0562062	FAM86C2P	FALSE	NA	NA	NA	NA
8122240	0.0220732	805	0.90426	0.12442	RNA5SP219	FALSE	chr6	136630242	+	NA
8080144	0.0220878	806	0.90426	0.0595373	PARP3	FALSE	chr3	51942358	+	NA
7985117	0.0221055	807	0.90426	-0.0794128	NA	FALSE	NA	NA	NA	NA
8089072	0.022107	808	0.90426	0.0544836	CPOX	FALSE	chr3	98593723	-	NA
7918048	0.0222119	809	0.90426	0.0988694	NA	FALSE	NA	NA	NA	NA
8119842	0.0222194	810	0.90426	0.0499042	POLR1C	FALSE	chr6	43517021	+	NA
7941563	0.022227	811	0.90426	-0.0919892	NA	FALSE	NA	NA	NA	NA
7896021	0.0222433	812	0.90426	0.303517	NA	FALSE	NA	NA	NA	NA
8005814	0.0222492	813	0.90426	0.0491612	NLK	FALSE	chr17	28042155	+	NA
8084541	0.0222725	814	0.90426	-0.038534	VPS8	FALSE	chr3	184812206	+	NA
8105647	0.0222802	815	0.90426	-0.0495675	TRAPPC13	FALSE	chr5	65625033	+	NA
7926898	0.0222926	816	0.90426	0.0639217	RNU6-908P	FALSE	chr10	29711914	+	NA
8172028	0.0223062	817	0.90426	0.0455689	NA	FALSE	NA	NA	NA	NA
8144740	0.0223476	818	0.90426	0.0638947	NA	FALSE	NA	NA	NA	NA
7996593	0.022433	819	0.90426	-0.0365844	CTCF	FALSE	chr16	67562406	+	NA
7929593	0.0224704	820	0.90426	0.0455119	RPL13AP5	FALSE	NA	NA	NA	NA
7953383	0.0224969	821	0.90426	0.267447	SCARNA10	FALSE	chr12	6510221	+	rs12296430; rs1800693
8095159	0.0225166	822	0.90426	-0.0664416	NA	FALSE	NA	NA	NA	NA
8044391	0.0225207	823	0.90426	-0.0664396	MERTK	FALSE	chr2	111898607	+	rs17174870
8081740	0.0225512	824	0.90426	0.0438613	ATP6V1A	FALSE	chr3	113747018	+	NA
7922416	0.0226312	825	0.90426	0.0985468	SNORD75	FALSE	chr2 chr4	42440376; 77702803	+	NA
8073068	0.0226643	826	0.90426	0.045013	APOBEC3C	TRUE	chr22	39014082	+	NA
8119898	0.0226996	827	0.90426	0.0654066	VEGFA	FALSE	chr6	43770706	+	NA
7894472	0.0227079	828	0.90426	-0.133065	NA	FALSE	NA	NA	NA	NA
8095137	0.0227593	829	0.90426	0.0984493	RNU6-746P	FALSE	chr4	55294489	+	NA
7893830	0.0227704	830	0.90426	0.157781	NA	FALSE	NA	NA	NA	NA
7915758	0.0227891	831	0.90426	0.0378719	GPBP1L1	FALSE	chr1	45686630	-	NA
7958273	0.0227906	832	0.90426	-0.0936025	NA	FALSE	NA	NA	NA	NA
8020037	0.0228007	833	0.90426	-0.0598624	MTCL1	FALSE	chr18	8717370	+	NA
7896165	0.0228169	834	0.90426	-0.153219	NA	FALSE	NA	NA	NA	NA
8032392	0.0228688	835	0.90426	-0.036469	MKNK2	FALSE	chr19	2051224	-	NA
7940959	0.0229094	836	0.90426	0.0398863	GPR137	FALSE	chr11	64284338	+	rs694739
8081128	0.0229333	837	0.90426	-0.0433857	NSUN3	FALSE	chr3	94062915	+	NA
8164196	0.0229363	838	0.90426	0.0679252	LOC51145	FALSE	NA	NA	NA	NA
8006377	0.0229431	839	0.90426	-0.0301801	ZNF207	FALSE	chr17	32350137	+	NA
7976063	0.0229457	840	0.90426	-0.0636006	NA	FALSE	NA	NA	NA	NA
8074931	0.022959	841	0.90426	-0.0522747	ZNF70	FALSE	chr22	23751092	-	NA
7933261	0.0230459	842	0.90426	-0.0894463	LOC100133130	FALSE	NA	NA	NA	NA
7933572	0.0230459	843	0.90426	-0.0894463	LOC100133130	FALSE	NA	NA	NA	NA
7920185	0.0230515	844	0.90426	0.0708811	LCE3D	FALSE	chr1	152580504	-	NA
8042468	0.0230936	845	0.90426	0.103552	ANXA4	FALSE	chr2	69741973	+	NA
7893818	0.0231139	846	0.90426	0.0882178	NA	FALSE	NA	NA	NA	NA
7922846	0.0231164	847	0.90426	0.0981801	FAM129A	FALSE	chr1	184974550	-	NA
8114113	0.0231306	848	0.90426	0.0635158	ZCCHC10	FALSE	chr5	133026604	-	NA
7979663	0.023133	849	0.90426	-0.0597215	RAB15	FALSE	chr14	64972157	-	NA
8119338	0.0231476	850	0.90426	0.0436656	GLP1R	FALSE	chr6	39048797	+	NA
7893142	0.0231495	851	0.90426	-0.10067	NA	FALSE	NA	NA	NA	NA
8175589	0.0231614	852	0.90426	0.0855648	NA	FALSE	NA	NA	NA	NA
8115164	0.0231813	853	0.90426	-0.0557524	RPS14	TRUE	chr5	150449727	-	NA
8084986	0.0231924	854	0.90426	-0.0363845	FYTTD1	FALSE	chr3	197749552	+	NA
8081878	0.0232479	855	0.905363	-0.15733	NA	FALSE	NA	NA	NA	NA
8110914	0.0232767	856	0.905426	0.0512688	RN7SKP79	FALSE	chr5	6848462	-	NA
8157283	0.0233136	857	0.905804	0.0377246	PRPF4	FALSE	chr9	113275342	+	NA
8083092	0.0233708	858	0.906111	0.078167	ZBTB38	FALSE	chr3	141387811	+	NA
8091879	0.0235095	859	0.906111	0.109883	NA	FALSE	NA	NA	NA	NA
7939998	0.0235621	860	0.906111	0.085307	OR5AK3P	FALSE	NA	NA	NA	NA
8070953	0.0235684	861	0.906111	0.0498233	SPATC1L	FALSE	chr21	46184459	-	NA
7893840	0.0235729	862	0.906111	-0.0555993	NA	FALSE	NA	NA	NA	NA
8152664	0.0235756	863	0.906111	-0.132285	NA	FALSE	NA	NA	NA	NA
8031514	0.0235789	864	0.906111	0.05887	ZNF865	FALSE	chr19	55605404	+	NA
7893609	0.0236091	865	0.906111	-0.0490997	NA	FALSE	NA	NA	NA	NA
7894227	0.0236178	866	0.906111	-0.135502	NA	FALSE	NA	NA	NA	NA
7908409	0.0236198	867	0.906111	-0.148891	RGS2	FALSE	chr1	192809041	+	rs1323292; rs1359062; rs2760524
7894796	0.0236983	868	0.906111	-0.0658913	NA	FALSE	NA	NA	NA	NA
7990020	0.0237038	869	0.906111	-0.0477592	ANP32A	FALSE	chr15	68820895	-	NA
7892854	0.0237175	870	0.906111	-0.205369	NA	FALSE	NA	NA	NA	NA
7952671	0.023789	871	0.906111	-0.0658501	RNU6-876P	FALSE	chr11	128993340	-	NA
8103043	0.0238359	872	0.906111	0.0390808	SLC10A7	FALSE	chr4	146521933	-	NA
7936064	0.0238663	873	0.906111	-0.0391538	NT5C2	FALSE	chr10	103094368; 103094535; 103105759; 103106650; 103106684; 103106687; 103140192; 103174982; 103181320; 103193272; 103193272; 103193298; 103193298; 103193306	-	NA
8010078	0.0239206	874	0.906111	-0.169824	SNORD1C	FALSE	chr17	76558790	+	NA
7918444	0.0239256	875	0.906111	-0.0505347	KCNA10	FALSE	chr1	110518838	-	NA
8052554	0.0239311	876	0.906111	0.0778419	FAM161A	FALSE	chr2	61854053	-	NA
8149069	0.0239325	877	0.906111	0.0850723	RN7SKP159	FALSE	chr8	5911236	-	NA
8060675	0.02397	878	0.906111	-0.0631479	CDC25B	FALSE	chr20	3801651; 3802768; 3801070; 3796430; 3795738; 3796290; 3795834; 3786771; 3786771	+	NA
8063903	0.0240085	879	0.906111	-0.036176	RPS21	FALSE	chr20	62387115	+	NA
7969151	0.0240147	880	0.906111	-0.0707307	CTAGE10P	FALSE	NA	NA	NA	NA
8080911	0.024016	881	0.906111	0.0631008	KBTBD8	FALSE	chr3	66998306	+	NA
7997489	0.0240268	882	0.906111	0.0449897	PLCG2	FALSE	chr16	81779257	+	NA
7950751	0.0240393	883	0.906111	-0.074683	SNORA70E	FALSE	chr11	83041598	-	NA
7948476	0.0241332	884	0.906111	-0.0361446	PRPF19	FALSE	chr11	60906588	-	rs34383631; rs650258
8057056	0.0241369	885	0.906111	-0.11331	TTN	FALSE	chr2	178807421	-	NA
7895809	0.0241405	886	0.906111	-0.109092	NA	FALSE	NA	NA	NA	NA
8020650	0.0241555	887	0.906111	-0.0592986	NA	FALSE	NA	NA	NA	NA
8024532	0.0242017	888	0.906111	0.0499731	ZNF57	FALSE	chr19	2900897	+	NA
8065332	0.0242155	889	0.906111	-0.070634	NA	FALSE	NA	NA	NA	NA
8115287	0.0242196	890	0.906111	0.0601038	SLC36A2	FALSE	chr5	151347590	-	NA
8020802	0.0242721	891	0.906464	0.0820253	RN7SKP44	FALSE	chr18	31718892	+	NA
8103516	0.0243693	892	0.906464	0.0701932	RN7SKP105	FALSE	chr4	163829113	-	NA
7934083	0.0244034	893	0.906464	-0.0503689	NEUROG3	FALSE	chr10	69573238	-	NA
7965767	0.0244148	894	0.906464	0.230276	NA	FALSE	NA	NA	NA	NA
8078350	0.0244241	895	0.906464	-0.0360721	TGFBR2	FALSE	chr3	30606600	+	NA
8059014	0.024428	896	0.906464	0.0448599	FEV	FALSE	chr2	218985657	-	NA
7893389	0.0244401	897	0.906464	0.217386	NA	FALSE	NA	NA	NA	NA
8148293	0.0244468	898	0.906464	-0.0552655	NSMCE2	FALSE	chr8	125091852	+	NA
8037640	0.0245417	899	0.90897	0.0498512	MIR330	FALSE	chr19	45639087	-	NA
8090664	0.0246607	900	0.911182	0.0529428	ASTE1	FALSE	chr3	131026792	-	NA
8053183	0.024681	901	0.911182	0.0490048	LBX2	FALSE	chr2	74499716	-	NA
7896123	0.0247077	902	0.911182	0.0497921	NA	FALSE	NA	NA	NA	NA
8002939	0.0247504	903	0.911182	0.0721068	RNA5SP430	FALSE	chr16	75861157	-	NA
7995348	0.0247602	904	0.911182	-0.0672527	RNA5SP416	FALSE	chr16	35751573	+	NA
7965471	0.0247943	905	0.911182	0.044743	UBE2N	FALSE	chr12	93442262	-	NA
8063484	0.0248173	906	0.911182	0.0447357	CSTF1	FALSE	chr20	56392370; 56392521; 56392410; 56392694; 56392370; 56392650; 56392682; 56392393	+	NA
8056426	0.0248203	907	0.911182	-0.0452443	TTC21B	FALSE	chr2	165953843	-	NA
7967210	0.0248902	908	0.912004	-0.0590041	LINC01089	FALSE	chr12	121802910; 121803484; 121801007; 121802933; 121802943; 121802402; 121802946; 121802604; 121801442; 121802945; 121802886; 121803906	-	NA
7938834	0.0249147	909	0.912004	0.0968776	NAV2	FALSE	chr11	19350723	+	NA
8078386	0.0249639	910	0.912004	-0.0550728	GPD1L	FALSE	chr3	32106510	+	NA
7898793	0.0249946	911	0.912004	-0.0550615	C1QA	FALSE	chr1	22636505	+	NA
7965431	0.0250079	912	0.912004	0.177909	CLLU1OS	FALSE	chr12	92428148	-	NA
8078665	0.0250391	913	0.912004	-0.042756	VILL	FALSE	chr3	37993586	+	NA
8132962	0.0250855	914	0.912004	0.0626169	SNORA15	FALSE	chr7	56060469	+	NA
8180206	0.025088	915	0.912004	-0.055027	NA	FALSE	NA	NA	NA	NA
8137483	0.0251065	916	0.912004	-0.0716511	FLJ16734	FALSE	NA	NA	NA	NA
7892811	0.0252443	917	0.912004	0.228817	NA	FALSE	NA	NA	NA	NA
8100834	0.0253027	918	0.912004	-0.0319134	GRSF1	FALSE	chr4	70839001	-	NA
7905938	0.0253054	919	0.912004	-0.0465196	SLC50A1	FALSE	chr1	155135343; 155135356; 155135390; 155135392; 155135811; 155135827; 155135849; 155135849; 155135857; 155135858; 155135866; 155135896; 155136315; 155138047	+	NA
8045136	0.0253373	920	0.912004	0.037182	WTH3DI	FALSE	NA	NA	NA	NA
8022326	0.0253872	921	0.912004	-0.0472144	MPPE1	FALSE	chr18	11908350	-	NA
8008969	0.0254096	922	0.912004	-0.0372084	TBX2	FALSE	chr17	61399895	+	NA
7894854	0.0254174	923	0.912004	-0.0587973	NA	FALSE	NA	NA	NA	NA
8045289	0.0254701	924	0.912004	0.0429432	RHOQP2	FALSE	NA	NA	NA	NA
7946013	0.0254716	925	0.912004	-0.0797873	OR51G1	FALSE	chr11	4924339	-	NA
7933634	0.025545	926	0.912004	-0.0739367	NA	FALSE	NA	NA	NA	NA
8146456	0.0255537	927	0.912004	0.0624108	RNU105C	FALSE	chr8	54330686	+	NA
7895952	0.0255714	928	0.912004	-0.130581	NA	FALSE	NA	NA	NA	NA
8130817	0.0256015	929	0.912004	0.0494801	MLLT4-AS1	FALSE	chr6	167826709	-	NA
7904881	0.0256317	930	0.912004	-0.0371534	PDIA3	FALSE	chr15	43746391	+	NA
8073546	0.0256549	931	0.912004	-0.0621509	LINC00634	FALSE	NA	NA	NA	NA
8030015	0.0256871	932	0.912004	-0.0425714	SYNGR4	FALSE	chr19	48364394	+	NA
8155877	0.0257106	933	0.912004	0.0623425	RN7SKP47	FALSE	chr9	74799894	+	NA
8076497	0.0257194	934	0.912004	0.0479359	A4GALT	FALSE	chr22	42695633	-	NA
7895072	0.0257406	935	0.912004	-0.0425563	NA	FALSE	NA	NA	NA	NA
7970676	0.0257628	936	0.912004	0.0486343	SHISA2	FALSE	chr13	26051031	-	NA
8119661	0.0257705	937	0.912004	-0.0421606	RRP36	FALSE	chr6	43021644	+	NA
7914202	0.025781	938	0.912004	0.0494186	SNHG12	FALSE	chr1	28581229	-	NA
7937106	0.0257922	939	0.912004	-0.0457212	NKX6-2	FALSE	chr10	132786052	-	NA
8154668	0.0258282	940	0.912004	0.12095	NA	FALSE	NA	NA	NA	NA
8142102	0.0258938	941	0.912004	0.0530003	ATXN7L1	FALSE	chr7	105876604	-	NA
8055087	0.0259245	942	0.912004	0.0796273	NA	FALSE	NA	NA	NA	NA
8010113	0.0259359	943	0.912004	0.0443881	MGAT5B	FALSE	chr17	76868455	+	NA
8152828	0.0260153	944	0.912004	0.068777	GSDMC	FALSE	chr8	129786888	-	NA
8068238	0.0260493	945	0.912004	-0.0466685	IFNAR2	FALSE	chr21	33229900; 33229970; 33229973; 33229981; 33230135; 33230140; 33230181; 33230181; 33230408; 33248743	+	NA
7954065	0.0261656	946	0.912004	0.0621463	GPRC5A	FALSE	chr12	12890781	+	NA
8135480	0.0261938	947	0.912004	-0.0546278	DNAJB9	FALSE	chr7	108569567	+	NA
8123104	0.026208	948	0.912004	-0.0466202	FNDC1	FALSE	chr6	159169396	+	rs1738074; rs212405
7933192	0.0262107	949	0.912004	-0.0546218	HNRNPA3P1	FALSE	NA	NA	NA	NA
8134655	0.026217	950	0.912004	0.0621244	CYP3A43	FALSE	chr7	99828042	+	NA
8160020	0.0262347	951	0.912004	0.10069	C9orf38	FALSE	NA	NA	NA	NA
7942032	0.0262362	952	0.912004	-0.0295045	PPP6R3	FALSE	chr11	68460769	+	NA
8018288	0.026239	953	0.912004	0.0438752	ATP5H	TRUE	chr17	75046985	-	NA
8065607	0.0262607	954	0.912004	0.0400699	PLAGL2	FALSE	chr20	32207791	-	NA
7894876	0.0262792	955	0.912004	-0.0914534	NA	FALSE	NA	NA	NA	NA
8111099	0.0263007	956	0.912004	0.0765371	EEF1A1P13	FALSE	NA	NA	NA	NA
8001531	0.026302	957	0.912004	-0.0618901	MT1G	FALSE	chr16	56668065	-	NA
7894171	0.0263026	958	0.912004	0.0620878	NA	FALSE	NA	NA	NA	NA
8132646	0.026389	959	0.912004	-0.0349543	CCM2	FALSE	chr7	45027633	+	NA
8008087	0.0264065	960	0.912004	0.0426681	NFE2L1	FALSE	chr17	48048358	+	rs4239162
8132830	0.0264321	961	0.912004	-0.0913649	RNU6-199P	FALSE	chr12	51162900	+	NA
8055941	0.0265537	962	0.912004	-0.0496556	RPRM	FALSE	chr2	153478808	-	NA
8086595	0.0265596	963	0.912004	0.0764009	XCR1	FALSE	chr3	46027742; 46027487	-	NA
7894491	0.0265651	964	0.912004	-0.111554	NA	FALSE	NA	NA	NA	NA
7967039	0.026576	965	0.912004	0.0368683	MSI1	FALSE	chr12	120369180	-	NA
8060294	0.0266444	966	0.912004	0.0399661	PDCD1	FALSE	chr2	241858908	-	NA
8146579	0.0266466	967	0.912004	0.0368508	CHD7	FALSE	chr8	60678777	+	NA
8159654	0.0266496	968	0.912004	-0.0373915	NELFB	FALSE	chr9	137255306	+	NA
8027480	0.0266804	969	0.912004	0.061928	RGS9BP	FALSE	chr19	32675406	+	NA
7906377	0.0267264	970	0.912004	0.120187	MNDA	FALSE	chr1	158831316	+	NA
7938762	0.0267312	971	0.912004	0.0382994	GTF2H1	FALSE	chr11	18322294	+	NA
8098084	0.0267368	972	0.912004	0.0661014	ETFDH	FALSE	chr4	158672124; 158672124; 158672306; 158672315; 158672315; 158672338; 158672404; 158681941	+	NA
7951447	0.0267589	973	0.912004	-0.0495901	CWF19L2	FALSE	chr11	107457844	-	NA
7892779	0.0267777	974	0.912004	-0.132797	NA	FALSE	NA	NA	NA	NA
7973694	0.0267829	975	0.912004	-0.0355098	LTB4R2	FALSE	chr14	24308954	+	NA
8000409	0.0267947	976	0.912004	-0.0464437	HMGN2	FALSE	chr1	26472518	+	NA
7951596	0.0267966	977	0.912004	0.0575477	POU2AF1	FALSE	chr11	111379692	-	NA
8025488	0.0268239	978	0.912004	-0.0582631	ZNF177	FALSE	chr19	9376410	+	NA
7895586	0.0268632	979	0.912004	-0.145869	NA	FALSE	NA	NA	NA	NA
8005707	0.0268987	980	0.912004	-0.0373315	MAP2K3	FALSE	chr17	21288035	+	NA
7895251	0.0269024	981	0.912004	-0.145834	NA	FALSE	NA	NA	NA	NA
7893666	0.026917	982	0.912004	0.21341	NA	FALSE	NA	NA	NA	NA
7892949	0.0269305	983	0.912004	0.170699	NA	FALSE	NA	NA	NA	NA
7903355	0.0269766	984	0.912004	0.0490182	GPR88	FALSE	chr1	100538136	+	rs11581062; rs12027668; rs7552544
7941917	0.0269791	985	0.912004	-0.046727	CABP4	FALSE	chr11	67455346	+	NA
7975645	0.02702	986	0.912459	0.0367589	ZNF410	FALSE	chr14	73886870	+	NA
8126135	0.0270715	987	0.912548	0.0574413	GLO1	FALSE	chr6	38703141	-	NA
7892689	0.0270774	988	0.912548	0.152811	NA	FALSE	NA	NA	NA	NA
7925201	0.0271058	989	0.912581	-0.0399085	ARID4B	FALSE	chr1	235327487	-	NA
8019296	0.0271706	990	0.913349	-0.0367827	SIRT7	FALSE	chr17	81918194	-	NA
7977571	0.0272078	991	0.913349	-0.046659	OSGEP	FALSE	chr14	20455105	-	NA
7894022	0.0272109	992	0.913349	0.21178	NA	FALSE	NA	NA	NA	NA
7895909	0.0273009	993	0.913571	0.152573	NA	FALSE	NA	NA	NA	NA
7938420	0.027302	994	0.913571	-0.086984	NA	FALSE	NA	NA	NA	NA
8006906	0.0273103	995	0.913571	0.0439785	ERBB2	FALSE	chr17	39687913	+	rs12946510
7896699	0.0274811	996	0.913571	-0.0465784	NA	FALSE	NA	NA	NA	NA
7927288	0.0274916	997	0.913571	0.0423598	FAM35DP	FALSE	NA	NA	NA	NA
8008914	0.027496	998	0.913571	-0.0580163	C17orf64	FALSE	chr17	60422508	+	rs180515
7909371	0.0275121	999	0.913571	0.0951357	CR1	FALSE	chr1	207496227	+	NA
8167912	0.0275311	1000	0.913571	0.152329	KLF8	FALSE	NA	NA	NA	NA
8030826	0.0275671	1001	0.913571	0.0654114	SIGLEC27P	FALSE	NA	NA	NA	NA
7893447	0.0275991	1002	0.913571	0.082906	NA	FALSE	NA	NA	NA	NA
8018093	0.0275998	1003	0.913571	0.0680409	RN7SKP180	FALSE	chr17	72664152	-	NA
8048976	0.0276452	1004	0.913571	-0.0579622	RN7SL834P	FALSE	chr2	230507100	+	rs10201872; rs9989735
7902891	0.0276619	1005	0.913571	-0.0420324	ZNF326	FALSE	chr1	89995133	+	NA
7912224	0.0276622	1006	0.913571	0.0686484	SLC2A5	FALSE	chr1	9069604	-	NA
8082816	0.0276683	1007	0.913571	0.0423106	SRPRB	FALSE	chr3	133784032	+	NA
7893213	0.027699	1008	0.913571	-0.175069	NA	FALSE	NA	NA	NA	NA
8102789	0.0277022	1009	0.913571	-0.0444026	TERF1P3	FALSE	NA	NA	NA	NA
8123819	0.0277369	1010	0.913571	0.0653377	EEF1E1	FALSE	chr6	8102548	-	NA
8110616	0.0277601	1011	0.913571	0.0828168	NA	FALSE	NA	NA	NA	NA
8158625	0.0277663	1012	0.913571	-0.0457855	LOC100129785	FALSE	NA	NA	NA	NA
8113071	0.0277954	1013	0.913628	0.0422754	LOC729040	FALSE	NA	NA	NA	NA
8091811	0.0278686	1014	0.91513	0.0517939	SI	FALSE	chr3	165078495	-	NA
7980578	0.0279009	1015	0.915287	0.0852705	NA	FALSE	NA	NA	NA	NA
8117045	0.027943	1016	0.915767	-0.0763968	RBM24	FALSE	chr6	17282063	+	NA
7942603	0.0280523	1017	0.918369	0.0684306	MOGAT2	FALSE	chr11	75717888	+	NA
8121483	0.0280776	1018	0.918369	0.0947757	NA	FALSE	NA	NA	NA	NA
8008868	0.028108	1019	0.918462	0.10635	CLTC-IT1	FALSE	NA	NA	NA	NA
7894010	0.0281841	1020	0.920046	-0.12851	NA	FALSE	NA	NA	NA	NA
8172711	0.0282134	1021	0.9201	0.085094	NA	FALSE	NA	NA	NA	NA
8117343	0.0282996	1022	0.9213	0.0531576	HFE	FALSE	chr6	26087318	+	NA
7976451	0.0283463	1023	0.9213	0.0482096	PPP4R4	FALSE	chr14	94174337	+	NA
8058450	0.0283507	1024	0.9213	0.061244	GPR1	FALSE	chr2	206213371; 206213438; 206213625; 206213628; 206213744; 206217900; 206217903; 206218024; 206218047; 206218047	-	NA
7892995	0.0283609	1025	0.9213	0.289022	NA	FALSE	NA	NA	NA	NA
8147654	0.0284319	1026	0.921654	0.0378742	POLR2K	FALSE	chr8	100150583	+	NA
7892830	0.0284467	1027	0.921654	-0.0369688	NA	FALSE	NA	NA	NA	NA
8126705	0.0284548	1028	0.921654	-0.070146	NA	FALSE	NA	NA	NA	NA
7904976	0.0285607	1029	0.923148	-0.0351134	NBPF8	FALSE	chr1	149082311	-	NA
8171874	0.028573	1030	0.923148	0.0944655	RN7SL91P	FALSE	NA	NA	NA	NA
7945275	0.0285841	1031	0.923148	-0.0475278	VPS26B	FALSE	chr11	134224644	+	NA
8132915	0.0288041	1032	0.927324	0.107542	RNU6-1126P	FALSE	chr7	55789367	+	NA
7922412	0.0288226	1033	0.927324	0.118491	SNORD81	FALSE	chr1 chr5 chr7	85592279; 18236122; 137287686	+	NA
7977445	0.0288266	1034	0.927324	0.0943086	KIAA0125	FALSE	chr14	105917978	+	NA
8102984	0.0288386	1035	0.927324	-0.0448466	NA	FALSE	NA	NA	NA	NA
7965671	0.0288764	1036	0.927324	-0.0900056	RNU4-24P	FALSE	chr12	96303513	-	NA
8095262	0.0288813	1037	0.927324	-0.0350441	REST	FALSE	chr4	56908912	+	NA
7893969	0.0289084	1038	0.927324	0.222844	NA	FALSE	NA	NA	NA	NA
7919438	0.0289724	1039	0.92773	-0.0350246	NBPF9	FALSE	chr1	149082311	-	NA
7914350	0.0289881	1040	0.92773	-0.0461458	SERINC2	FALSE	chr1	31409564; 31410173; 31410216; 31413115; 31413812; 31413812	+	NA
7951091	0.0291049	1041	0.92773	-0.127819	NA	FALSE	NA	NA	NA	NA
7986348	0.0291629	1042	0.92773	0.0518653	RN7SL677P	FALSE	chr15	97353496	+	NA
8045423	0.0292008	1043	0.92773	-0.0607845	TAF1D	FALSE	chr11	93736157	-	NA
8038078	0.0292645	1044	0.92773	0.0362289	KDELR1	TRUE	chr19	48391553	-	NA
8000945	0.0292672	1045	0.92773	-0.0607603	NA	FALSE	NA	NA	NA	NA
7900216	0.029341	1046	0.92773	-0.0401762	AKIRIN1	FALSE	chr1	38991287	+	NA
7954481	0.0293468	1047	0.92773	0.0986056	SSPN	FALSE	chr12	26195339	+	NA
7967358	0.0293518	1048	0.92773	-0.063029	PITPNM2	FALSE	chr12	123110428	-	rs1790100; rs7132277; rs949143
7894933	0.0293799	1049	0.92773	0.0646444	NA	FALSE	NA	NA	NA	NA
8005951	0.0294049	1050	0.92773	0.0608302	SNORD42B	FALSE	chr17	28720549	+	NA
8062339	0.0294139	1051	0.92773	0.0527794	TLDC2	FALSE	chr20	36876130	+	NA
7923041	0.0294266	1052	0.92773	0.0698633	RNU6-983P	FALSE	chr1	194488205	-	NA
8159838	0.029437	1053	0.92773	-0.0635125	C9orf66	FALSE	chr9	215741	-	NA
7939102	0.0294414	1054	0.92773	-0.0415742	ELP4	FALSE	chr11	31509777	+	NA
8117822	0.0294674	1055	0.92773	0.0474604	ZNRD1	FALSE	chr6	30061256	+	NA
8075778	0.0295129	1056	0.92773	0.0467518	TXN2	FALSE	chr22	36482030	-	NA
8166769	0.0295488	1057	0.92773	-0.0572928	OTC	FALSE	NA	NA	NA	NA
7917604	0.0295548	1058	0.92773	-0.0401244	ZNF644	FALSE	chr1	91021457	-	NA
8097541	0.0296475	1059	0.92773	0.0938087	RN7SL152P	FALSE	chr4	140577924	+	NA
7893392	0.029649	1060	0.92773	0.117852	NA	FALSE	NA	NA	NA	NA
8105645	0.0297162	1061	0.92773	0.0648243	NA	FALSE	NA	NA	NA	NA
7895668	0.0297372	1062	0.92773	0.172097	NA	FALSE	NA	NA	NA	NA
7963263	0.0297375	1063	0.92773	-0.0755777	NA	FALSE	NA	NA	NA	NA
8171723	0.0297407	1064	0.92773	0.0776307	NA	FALSE	NA	NA	NA	NA
7998510	0.0297538	1065	0.92773	-0.0459333	CLCN7	FALSE	chr16	1475084	-	rs2744148
8019211	0.0297883	1066	0.92773	-0.0361916	NPLOC4	FALSE	chr17	81637146	-	NA
8139737	0.0298159	1067	0.92773	-0.0534136	PSPH	FALSE	chr7	56051604	-	NA
8125360	0.0298574	1068	0.92773	-0.0342046	PBX2	FALSE	chr6	32190186	-	NA
7913694	0.0298662	1069	0.92773	0.0564098	FUCA1	FALSE	chr1	23868294	-	NA
7892878	0.0298978	1070	0.92773	-0.0894663	NA	FALSE	NA	NA	NA	NA
8112940	0.0299366	1071	0.92773	-0.0451829	SSBP2	FALSE	chr5	81751253	-	NA
8037459	0.0299497	1072	0.92773	0.0709499	ZNF285	FALSE	chr19	44401575	-	NA
8082163	0.029974	1073	0.92773	0.0432333	NA	FALSE	NA	NA	NA	NA
8051622	0.0299941	1074	0.92773	0.0391111	SRSF7	FALSE	chr2	38751494	-	NA
8033465	0.0301094	1075	0.92773	0.0390832	TIMM44	TRUE	chr19	7943920	-	NA
8151234	0.0301205	1076	0.92773	-0.0458331	NA	FALSE	NA	NA	NA	NA
8093130	0.0301482	1077	0.92773	0.0465666	RNF168	FALSE	chr3	196503768	-	NA
7904869	0.0301518	1078	0.92773	-0.0399814	ABHD17A	FALSE	chr19	1885547	-	NA
7904948	0.0301518	1079	0.92773	-0.0399814	ABHD17A	FALSE	chr19	1885547	-	NA
7998336	0.0302051	1080	0.92773	0.0510276	NARFL	FALSE	chr16	741002	-	rs2744148
7904999	0.0302342	1081	0.92773	-0.034759	NBPF8	FALSE	chr1	149082311	-	NA
8018620	0.0303319	1082	0.92773	-0.0309159	EXOC7	FALSE	chr17	76103758	-	NA
7919271	0.0303378	1083	0.92773	-0.0347377	NBPF8	FALSE	chr1	149082311	-	NA
7895911	0.0303401	1084	0.92773	-0.0399368	NA	FALSE	NA	NA	NA	NA
7895675	0.0303705	1085	0.92773	0.0979623	NA	FALSE	NA	NA	NA	NA
8031344	0.0304094	1086	0.92773	-0.0752818	KIR2DS2	FALSE	NA	NA	NA	NA
7928600	0.0304227	1087	0.92773	-0.0413315	EIF5AL1	FALSE	chr10	79512600	+	rs1250542; rs1250550; rs1782645
8024909	0.0304368	1088	0.92773	-0.048484	KDM4B	FALSE	chr19	4969120	+	NA
8089295	0.0304498	1089	0.92773	-0.0584042	NA	FALSE	NA	NA	NA	NA
7985053	0.0304512	1090	0.92773	-0.0399106	FBXO22	FALSE	chr15	75903877	+	NA
8098789	0.0304538	1091	0.92773	-0.0287384	GAK	FALSE	chr4	932373	-	NA
7936683	0.0305336	1092	0.92773	0.0378887	TIAL1	FALSE	chr10	119596495	-	NA
8151238	0.0305531	1093	0.92773	0.0813374	RN7SL675P	FALSE	chr8	69923047	-	NA
7977319	0.0305581	1094	0.92773	-0.069867	PLD4	FALSE	chr14	104924822	+	NA
8090934	0.0306139	1095	0.92773	-0.085284	RNU6-1284P	FALSE	chr3	136430183	-	NA
8171837	0.0306959	1096	0.92773	-0.0456781	KLHL15	FALSE	NA	NA	NA	NA
8145334	0.0307454	1097	0.92773	0.064409	ADAM7	FALSE	chr8	24441025	+	NA
8055482	0.0307605	1098	0.92773	0.0705916	RN7SKP286	FALSE	chr2	138863895	-	NA
8113467	0.0307737	1099	0.92773	0.0523187	GJA1P1	FALSE	NA	NA	NA	NA
7928491	0.0308172	1100	0.92773	-0.0390134	KAT6B	FALSE	chr10	74838699	+	NA
7892742	0.0308499	1101	0.92773	0.0836693	NA	FALSE	NA	NA	NA	NA
7895884	0.0308619	1102	0.92773	0.116941	NA	FALSE	NA	NA	NA	NA
7960117	0.0308659	1103	0.92773	-0.0530851	PXMP2	FALSE	chr12	132687605	+	NA
7944111	0.0308706	1104	0.92773	-0.0624691	NA	FALSE	chr11	117263798	+	NA
8051187	0.0308952	1105	0.92773	0.0358655	FNDC4	FALSE	chr2	27495245	-	NA
8008682	0.0309277	1106	0.92773	-0.0397991	MSI2	FALSE	chr17	57256533	+	NA
8127360	0.0309567	1107	0.92773	0.0930361	NA	FALSE	NA	NA	NA	NA
8043071	0.0310761	1108	0.92773	0.104331	DNAH6	FALSE	chr2	84516454	+	NA
8063566	0.0310761	1109	0.92773	0.0414114	RAE1	FALSE	chr20	57351543	+	NA
7894806	0.0311843	1110	0.92773	-0.0397397	NA	FALSE	NA	NA	NA	NA
7896102	0.0312046	1111	0.92773	-0.104496	NA	FALSE	NA	NA	NA	NA
8103743	0.0312289	1112	0.92773	0.0521736	RNU6-1096P	FALSE	chr4	173446704	-	NA
7981190	0.0312339	1113	0.92773	0.0928761	LOC100130815	FALSE	NA	NA	NA	NA
7940307	0.0312697	1114	0.92773	0.0703707	MS4A13	FALSE	chr11	60515412	+	NA
8162249	0.0312755	1115	0.92773	-0.0567166	LOC102724237	FALSE	NA	NA	NA	NA
8064014	0.0313666	1116	0.92773	-0.0529318	SLC17A9	FALSE	chr20	62952646	+	NA
7894130	0.0313821	1117	0.92773	0.170268	NA	FALSE	NA	NA	NA	NA
7928645	0.0314091	1118	0.92773	0.0371802	NUTM2A	FALSE	chr10	87225447	+	NA
7896003	0.0314183	1119	0.92773	-0.129275	NA	FALSE	NA	NA	NA	NA
7951679	0.0314656	1120	0.92773	0.0461931	TIMM8B	FALSE	chr11	112086795; 112086798; 112086798; 112086722	-	NA
7926622	0.0314987	1121	0.92773	-0.0454659	SPAG6	FALSE	chr10	22360821	+	NA
7895676	0.0315032	1122	0.92773	0.042831	NA	FALSE	NA	NA	NA	NA
8108013	0.0315193	1123	0.92773	-0.0645104	NA	FALSE	NA	NA	NA	NA
7983391	0.03159	1124	0.92773	0.0972201	RNU6-966P	FALSE	chr15	44973557	+	NA
7980452	0.0316068	1125	0.92773	-0.0747679	RN7SL587P	FALSE	chr14	77547846	-	NA
7893679	0.0316114	1126	0.92773	0.190206	NA	FALSE	NA	NA	NA	NA
8179049	0.0316559	1127	0.92773	-0.0344709	HLA-J	FALSE	NA	NA	NA	NA
7909782	0.031656	1128	0.92773	-0.0528442	RRP15	FALSE	chr1	218285286	+	NA
8117018	0.0316724	1129	0.92773	-0.171238	RNU6-522P	FALSE	chr6	15314919	+	NA
7893906	0.0316762	1130	0.92773	0.113828	NA	FALSE	NA	NA	NA	NA
7970158	0.0316834	1131	0.92773	-0.0565844	ATP11AUN	FALSE	chr13	112647043	+	NA
7896717	0.0317517	1132	0.92773	-0.0453999	NA	FALSE	NA	NA	NA	NA
7895800	0.0318216	1133	0.92773	-0.12899	NA	FALSE	NA	NA	NA	NA
7893125	0.0318627	1134	0.92773	-0.0865952	NA	FALSE	NA	NA	NA	NA
7952641	0.0319127	1135	0.92773	-0.108119	ARHGAP32	FALSE	chr11	129192198	-	NA
8091678	0.0319128	1136	0.92773	0.0924897	VEPH1	FALSE	chr3	157503339	-	NA
7904203	0.0319182	1137	0.92773	0.070094	TSHB	FALSE	chr1	115029823	+	NA
8008646	0.0319979	1138	0.92773	0.0636066	SCPEP1	FALSE	chr17	56978104	+	NA
8128865	0.0320853	1139	0.92773	0.083038	RN7SL617P	FALSE	chr6	110440303	-	NA
8047339	0.032122	1140	0.92773	-0.0357008	BZW1	FALSE	chr2	200811922; 200811909; 200812675; 200810593; 200812988; 200811545; 200811545; 200818271; 200818033; 200812355; 200818325; 200812184; 200811545	+	NA
7918951	0.0322164	1141	0.92773	0.0597867	NA	FALSE	NA	NA	NA	NA
8011462	0.0322247	1142	0.92773	-0.0386979	C17orf85	FALSE	NA	NA	NA	NA
7895051	0.0322248	1143	0.92773	-0.144834	NA	FALSE	NA	NA	NA	NA
8130505	0.0322535	1144	0.92773	0.0315361	EZR	TRUE	chr6	158819412	-	rs1738074; rs212405
7995258	0.0323579	1145	0.92773	-0.056369	ZNF267	FALSE	chr16	31873757; 31873806; 31873830; 31873832; 31874065; 31911853	+	NA
8124588	0.0323691	1146	0.92773	0.055555	GPX6	FALSE	chr6	28515793	-	NA
8127423	0.0323912	1147	0.92773	0.175143	NA	FALSE	NA	NA	NA	NA
7939383	0.0324102	1148	0.92773	0.0804178	PRR5L	FALSE	chr11	36296287	+	NA
7895250	0.0324159	1149	0.92773	0.0944868	NA	FALSE	NA	NA	NA	NA
8086451	0.0324299	1150	0.92773	0.0637547	HIGD1A	FALSE	chr3	42804433	-	NA
7893196	0.0325073	1151	0.92773	-0.0525902	NA	FALSE	NA	NA	NA	NA
8044880	0.0325238	1152	0.92773	-0.0881476	NA	FALSE	NA	NA	NA	NA
7936280	0.0325262	1153	0.92773	0.0803619	RN7SKP278	FALSE	chr10	108941310	-	NA
7956005	0.0325556	1154	0.92773	0.0921303	OR2AP1	FALSE	chr12	55574414	+	NA
8116908	0.0325559	1155	0.92773	-0.0624162	NA	FALSE	chr6	11709818	+	NA
7974895	0.0326374	1156	0.92773	-0.125326	LINC00643	FALSE	chr14	62114352; 62118144; 62117356; 62117356; 62127243; 62118623	+	NA
7907464	0.0326458	1157	0.92773	-0.0843165	NA	FALSE	NA	NA	NA	NA
8074591	0.0326463	1158	0.92773	0.0762556	RN7SKP63	FALSE	chr22	21389190	+	rs2283792
7966299	0.0326796	1159	0.92773	0.115635	RN7SL769P	FALSE	chr12	110360746	-	NA
7989708	0.0327057	1160	0.92773	0.0425264	MTFMT	FALSE	chr15	65029627	-	NA
8148270	0.0327127	1161	0.92773	-0.0451535	NDUFB9	FALSE	chr8	124539130; 124539143; 124542939; 124546677; 124539102; 124549773; 124539139	+	NA
8025978	0.0327362	1162	0.92773	0.0684569	ZNF763	FALSE	chr19	11965053	+	NA
7991171	0.0327513	1163	0.92773	-0.125249	RNU6-1280P	FALSE	chr15	85651628	-	NA
7893533	0.0327585	1164	0.92773	0.063319	NA	FALSE	NA	NA	NA	NA
8099850	0.0327858	1165	0.92773	0.0633088	TMEM156	FALSE	chr4	39032421	-	NA
7893443	0.0328303	1166	0.92773	0.0684188	NA	FALSE	NA	NA	NA	NA
7894294	0.0328493	1167	0.92773	-0.0393638	NA	FALSE	NA	NA	NA	NA
7893649	0.0329148	1168	0.92773	-0.0622919	NA	FALSE	NA	NA	NA	NA
8111925	0.0329215	1169	0.92773	0.0663876	ANXA2R	FALSE	chr5	43040345	-	NA
7896407	0.0329381	1170	0.92773	0.217014	NA	FALSE	NA	NA	NA	NA
8146423	0.0329671	1171	0.92773	0.0663697	NA	FALSE	NA	NA	NA	NA
8178205	0.0330317	1172	0.92773	0.0825686	HLA-DQA2	FALSE	chr6	32741341	+	NA
8169361	0.0330343	1173	0.92773	-0.0841372	NA	FALSE	NA	NA	NA	NA
8177788	0.033087	1174	0.92773	-0.028305	HLA-E	FALSE	chr6	30489466; 30489509; 30489511	+	NA
8179103	0.033087	1175	0.92773	-0.028305	HLA-E	FALSE	chr6	30489466; 30489509; 30489511	+	NA
7956747	0.0331145	1176	0.92773	0.0918228	LDHAL6CP	FALSE	NA	NA	NA	NA
7979849	0.0331206	1177	0.92773	-0.0304224	DCAF5	FALSE	chr14	69153003	-	rs2236262; rs4902647
7999279	0.0331327	1178	0.92773	-0.0477433	NAGPA	FALSE	chr16	5033934	-	NA
7983775	0.0331628	1179	0.92773	0.163847	RNU2-53P	FALSE	chr15	53651976	+	NA
8165934	0.0331655	1180	0.92773	0.0449254	SHROOM2	FALSE	NA	NA	NA	NA
8129837	0.0331659	1181	0.92773	-0.0561159	IL20RA	FALSE	chr6	137044312	-	rs17066096
8060503	0.0331997	1182	0.92773	-0.074109	SNORD57	FALSE	chr20	2656938	+	NA
8109177	0.0332342	1183	0.92773	0.0634527	RN7SL868P	FALSE	chr5	149722069	+	NA
8091422	0.03331	1184	0.92773	-0.0621215	WWTR1	FALSE	chr3	149703273	-	NA
8095135	0.0333377	1185	0.92773	0.0716151	RN7SL424P	FALSE	chr4	55063737	+	NA
7956417	0.0333551	1186	0.92773	-0.0740461	RNU6-879P	FALSE	chr12	57415295	+	rs12368653; rs201202118; rs703842
8068052	0.0333723	1187	0.92773	0.0759287	LINC00314	FALSE	chr21	28013362	+	NA
8109315	0.0333742	1188	0.92773	0.0662113	MYOZ3	FALSE	chr5	150669092; 150662940; 150671420; 150671760; 150672056; 150671657; 150660873; 150672651; 150660881	+	NA
7980576	0.0334476	1189	0.92773	0.0961366	NA	FALSE	NA	NA	NA	NA
7896201	0.0334565	1190	0.92773	-0.0436603	NA	FALSE	NA	NA	NA	NA
7894922	0.0334617	1191	0.92773	-0.169641	NA	FALSE	NA	NA	NA	NA
7893182	0.0334721	1192	0.92773	-0.0717096	NA	FALSE	NA	NA	NA	NA
7951093	0.0334867	1193	0.92773	-0.0406144	FAM76B	FALSE	chr11	95789791	-	NA
8155284	0.0335054	1194	0.92773	0.0551857	FRMPD1	FALSE	chr9	37650999	+	NA
8078187	0.033535	1195	0.92773	-0.0436414	PLCL2	FALSE	chr3	16884958	+	NA
8095986	0.0335933	1196	0.92773	0.091563	ANXA3	FALSE	chr4	78551518	+	NA
8174642	0.0335952	1197	0.92773	0.0423073	LOC642776	FALSE	NA	NA	NA	NA
7934531	0.0336047	1198	0.92773	0.0608637	PPIAP13	FALSE	NA	NA	NA	NA
7893656	0.0336705	1199	0.92773	0.279233	NA	FALSE	NA	NA	NA	NA
8117395	0.0336927	1200	0.92773	0.0964834	HIST1H2BF	FALSE	chr6	26199519	+	NA
7896413	0.0337086	1201	0.92773	0.0632775	NA	FALSE	NA	NA	NA	NA
8070194	0.0337261	1202	0.92773	-0.0340705	RUNX1	FALSE	chr21	34888690	-	NA
7959572	0.0337298	1203	0.92773	-0.192277	NA	FALSE	NA	NA	NA	NA
8049083	0.0337424	1204	0.92773	-0.0442105	PTMA	TRUE	chr2	231709780	+	NA
7982204	0.0337457	1205	0.92773	-0.0448954	HMGN2	FALSE	chr1	26472518	+	NA
8118564	0.0337515	1206	0.92773	0.0797818	HLA-DQA2	FALSE	chr6	32741341	+	NA
8013606	0.0337911	1207	0.92773	0.0447633	VTN	FALSE	chr17	28370822	-	NA
7892553	0.0337951	1208	0.92773	-0.192214	NA	FALSE	NA	NA	NA	NA
8154213	0.0338277	1209	0.92773	0.142252	NA	FALSE	NA	NA	NA	NA
8086494	0.0338374	1210	0.92773	-0.0522044	ZNF852	FALSE	chr3	44510636	-	NA
8030383	0.0338403	1211	0.92773	-0.048	RCN3	FALSE	chr19	49527617	+	rs2303759; rs8107548
8023526	0.033871	1212	0.92773	-0.0521949	HMGN1P30	FALSE	NA	NA	NA	NA
7906367	0.0338842	1213	0.92773	-0.0597238	OR10R2	FALSE	chr1	158479877	+	NA
8052845	0.033947	1214	0.92773	-0.0344826	TIA1	FALSE	chr2	70248660	-	NA
7991846	0.0339712	1215	0.92773	0.0422162	DECR2	FALSE	chr16	401825	+	NA
7893299	0.0339926	1216	0.92773	-0.143493	NA	FALSE	NA	NA	NA	NA
7928298	0.0340152	1217	0.92773	-0.0558554	NA	FALSE	NA	NA	NA	NA
8126820	0.0340206	1218	0.92773	0.0713308	GPR110	FALSE	chr6	47042294	-	NA
8037621	0.0340216	1219	0.92773	-0.0391088	EML2	FALSE	chr19	45645629	-	NA
8021374	0.0340515	1220	0.92773	-0.0874211	RSL24D1P11	FALSE	NA	NA	NA	NA
8049123	0.0340615	1221	0.92773	-0.0737636	ALPP	FALSE	chr2	232378533	+	NA
8138592	0.034074	1222	0.92773	0.055005	TRA2A	FALSE	chr7	23532041; 23532041; 23532041; 23532041; 23506206; 23505885; 23506480; 23506208; 23531981; 23531680; 23531980; 23532023	-	NA
7911092	0.0341045	1223	0.92773	0.095766	RN7SKP55	FALSE	chr1	244943909	+	NA
8157691	0.0341321	1224	0.92773	0.0503359	SKA2	FALSE	chr17	59155194	-	NA
7921473	0.0342042	1225	0.92773	-0.047463	CCDC19	FALSE	NA	NA	NA	NA
8063949	0.0342184	1226	0.92773	-0.0404514	MRGBP	FALSE	chr20	62796452	+	NA
7984779	0.0342832	1227	0.92773	0.0417411	PML	FALSE	chr15	73994672	+	NA
8066417	0.0343481	1228	0.92773	0.0351477	SERINC3	FALSE	chr20	44522109	-	NA
8168855	0.0343627	1229	0.92773	0.0794992	ARMCX4	FALSE	NA	NA	NA	NA
8180351	0.0344148	1230	0.92773	0.0677903	NA	FALSE	NA	NA	NA	NA
7972810	0.0344283	1231	0.92773	-0.0390221	CARS2	FALSE	chr13	110706157	-	NA
8137962	0.0344479	1232	0.92773	-0.0404009	LOC100129484	FALSE	NA	NA	NA	NA
8152845	0.0344483	1233	0.92773	-0.035241	FAM49B	FALSE	chr8	129939872	-	NA
7936826	0.0344593	1234	0.92773	-0.0434213	IKZF5	FALSE	chr10	123008687	-	NA
8097951	0.0344627	1235	0.92773	0.0727157	NA	FALSE	NA	NA	NA	NA
7964810	0.0344787	1236	0.92773	-0.0478336	MDM1	FALSE	chr12	68332286	-	NA
8048014	0.0344864	1237	0.92773	-0.0478316	RPE	FALSE	chr2	210002649; 210002633; 210002642; 210002638; 210002642; 210002642; 210002623; 210002641; 210002642; 210002655; 210002656; 210002583; 210002627; 210002564; 210002627; 210002564	+	NA
7944351	0.0344935	1238	0.92773	-0.0570958	FOXR1	FALSE	chr11	118971706	+	rs523604; rs533646
7937208	0.0345739	1239	0.92807	-0.0403733	FUOM	FALSE	chr10	133358035	-	NA
7960635	0.0346443	1240	0.92807	0.0501894	SCARNA11	FALSE	chr12	6581609	-	rs12296430; rs1800693
7927474	0.0346587	1241	0.92807	0.0496994	C10orf71	FALSE	chr10	49299192	+	NA
8144857	0.0346648	1242	0.92807	0.0689734	NAT1	FALSE	chr8	18210092	+	NA
7894671	0.0346918	1243	0.92807	0.0589314	NA	FALSE	NA	NA	NA	NA
7949954	0.0346977	1244	0.92807	-0.123974	NA	FALSE	NA	NA	NA	NA
7894752	0.0347213	1245	0.92807	-0.123959	NA	FALSE	NA	NA	NA	NA
7895312	0.0347841	1246	0.92807	-0.0588946	NA	FALSE	NA	NA	NA	NA
7976560	0.0347894	1247	0.92807	0.0725799	BDKRB2	FALSE	chr14	96204794	+	NA
7927876	0.0348108	1248	0.92807	-0.0591587	TET1	FALSE	chr10	68560655	+	NA
7993181	0.0348162	1249	0.92807	0.0547729	NA	FALSE	NA	NA	NA	NA
8104490	0.0348406	1250	0.92807	-0.0755318	NA	FALSE	NA	NA	NA	NA
7893169	0.0349432	1251	0.929301	-0.0676133	NA	FALSE	NA	NA	NA	NA
8011011	0.035	1252	0.929301	0.0496039	YWHAE	FALSE	chr17	1400378	-	NA
8134091	0.0350036	1253	0.929301	-0.0569401	CLDN12	FALSE	chr7	90403352	+	NA
8095161	0.0350284	1254	0.929301	0.0650166	RNU6-276P	FALSE	chr4	55798635	+	NA
8093576	0.0350366	1255	0.929301	-0.0699423	SCARNA22	FALSE	chr4	1974635	+	NA
8169247	0.0350688	1256	0.929301	0.0907821	NCBP2L	FALSE	NA	NA	NA	NA
7895606	0.0351369	1257	0.929301	-0.0380806	NA	FALSE	NA	NA	NA	NA
8176675	0.035138	1258	0.929301	0.0529865	XKRY2	FALSE	NA	NA	NA	NA
8177180	0.035138	1259	0.929301	0.0529865	XKRY2	FALSE	NA	NA	NA	NA
8170538	0.035209	1260	0.929496	0.0466173	GABRQ	FALSE	NA	NA	NA	NA
8006590	0.0352381	1261	0.929496	0.081518	NA	FALSE	NA	NA	NA	NA
7947421	0.03527	1262	0.929496	-0.12361	NA	FALSE	NA	NA	NA	NA
[truncated: 32,035 more rows]

## Sheet: CD4 cells, all
Transcript Cluster ID	p Value	Rank	False Discovery Rate	est. % diff in expression	Gene Name	Control Gene	Chromosome(s)	Hg38 Transcription Start Site(s)	Hg38 Strand	MS Risk SNPs within 500kb
[truncated: 33,297 more rows]

[truncated: 6 more sheets: CD8 cells, all, Monocytes, near risk SNPs, NK cells, near risk SNPs, B cells, near risk SNPs, CD4 cells, near risk SNPs, CD8 cells, near risk SNPs]
